# Supplementary material for: Aneuploidy drives the acquisition of cancer-specific driver genes
Source: Research Square preprint supplement (doi:10.21203/rs.3.rs-4941895/v1), 2024-09-04
Supplement: Supplementary file 2 [file 85e0e0f2b398130789e22267.xlsx]

## Sheet: DEGs (sgFbxw7 vs sgSHL)
gene	baseMean	log2FoldChange	lfcSE	stat	pvalue	padj
S100g	166.567	8.4131	0.920339	9.1413	6.17034e-20	1.14485e-16
Phox2a	25.4802	7.43854	1.30444	5.70246	1.1809e-08	2.35596e-06
Vit	595.241	7.19947	0.802434	8.97204	2.9106e-19	3.85738e-16
Gm18787	12.1115	7.07827	1.63279	4.33507	1.45712e-05	0.000922709
Krt90	238.681	6.66064	1.02372	6.50631	7.70193e-11	2.97712e-08
Nfasc	177.209	6.62283	0.665969	9.94465	2.66104e-23	8.22883e-20
Klk11	395.77	6.37775	0.579373	11.008	3.49598e-28	2.16215e-24
Rgs17	78.5124	6.33295	1.11743	5.66742	1.44965e-08	2.83125e-06
Vnn1	572.765	6.07629	0.671532	9.0484	1.45077e-19	2.07058e-16
Acan	2356.2	5.92047	1.39744	4.23665	2.26877e-05	0.00136671
Gm12407	5.09178	5.82778	1.73508	3.35881	0.000782799	0.020042
Upk3bl	61.0094	5.50222	1.81444	3.03247	0.00242564	0.044253
Grik1	152.425	5.49909	1.79075	3.07084	0.0021346	0.040455
Wfdc21	69.6351	5.06863	0.953632	5.31509	1.06607e-07	1.56984e-05
Tmem178	158.217	4.99738	0.967889	5.16317	2.42804e-07	3.10689e-05
Gm20689	4.66729	4.94258	1.44296	3.4253	0.000614131	0.0168809
Col2a1	7473.64	4.69758	1.2501	3.75776	0.000171445	0.0064523
Galnt14	556.296	4.57835	0.909683	5.03291	4.83095e-07	5.53293e-05
Tnn	944.87	4.52758	1.3753	3.29206	0.000994565	0.0235072
Wfdc15b	27.4763	4.47669	1.20823	3.70516	0.000211259	0.00750902
Clcnka	28.5713	4.39674	1.01081	4.34973	1.36303e-05	0.00087811
Sox6	177.978	4.36361	0.585922	7.44743	9.51762e-14	5.35121e-11
Rtn4r	154.127	4.34168	0.533941	8.13138	4.24425e-16	3.74989e-13
Ccl21b	108.606	4.24877	0.881036	4.82248	1.41786e-06	0.000137733
Cpz	349.73	4.14616	0.813983	5.09366	3.51209e-07	4.28706e-05
C1qtnf3	251.581	4.12476	0.761709	5.41513	6.12427e-08	9.96752e-06
Fndc1	2303.03	4.10898	0.463685	8.86158	7.88911e-19	9.7583e-16
Pirt	221.482	4.01269	0.720471	5.56954	2.55416e-08	4.739e-06
Wnt10b	123.481	4.00585	0.455292	8.79842	1.38753e-18	1.60902e-15
Esm1	353.789	4.00125	0.864415	4.62885	3.67704e-06	0.000296625
1500009C09Rik	193.385	3.98059	0.732297	5.43575	5.45665e-08	8.95953e-06
Cpa1	33.643	3.91174	1.12502	3.47706	0.000506948	0.0145828
Sfrp2	1263.88	3.9042	0.483282	8.07852	6.55587e-16	5.28859e-13
Dynap	124.852	3.8845	0.703982	5.51789	3.43089e-08	6.12084e-06
Adamts16	98.6811	3.87271	0.479861	8.07049	7.00193e-16	5.41308e-13
Gm2564	84.802	3.86823	0.886677	4.36262	1.28516e-05	0.000836662
Pcolce2	209.871	3.82751	0.779732	4.90875	9.16595e-07	9.44626e-05
Cntn2	1831.37	3.82634	0.77966	4.9077	9.21512e-07	9.44626e-05
Csn1s1	2672.5	3.81407	0.802926	4.75022	2.032e-06	0.00018046
Slc4a8	131.446	3.73108	0.501915	7.43368	1.05615e-13	5.7635e-11
Tmem213	129.39	3.71021	1.00073	3.70749	0.000209323	0.00746882
Matn4	2592.13	3.70787	0.751441	4.93435	8.042e-07	8.47507e-05
Slurp1	39.283	3.69146	0.953938	3.86971	0.000108966	0.00448281
Klk14	36.8608	3.68087	0.553195	6.65384	2.85546e-11	1.15174e-08
Wfdc5	446.456	3.64056	0.781696	4.65726	3.20449e-06	0.00026308
Krt75	60.4793	3.61023	0.57794	6.24672	4.19151e-10	1.32883e-07
Slc27a2	34.8733	3.59951	0.839615	4.2871	1.81023e-05	0.00112331
Klk8	828.058	3.57953	0.680092	5.2633	1.41489e-07	1.9162e-05
Ccl19	54.2623	3.56278	0.902072	3.94955	7.82976e-05	0.00338879
Ak5	52.079	3.55628	0.956105	3.71955	0.000199576	0.00721818
Fabp4	346.698	3.52486	0.773315	4.55812	5.16141e-06	0.000389288
Ccl21a	366.062	3.5048	0.672907	5.20845	1.9042e-07	2.47067e-05
Fam180a	267.218	3.50134	0.907373	3.85877	0.000113961	0.00464712
Nts	20.5431	3.45328	0.82259	4.19806	2.69207e-05	0.00156188
Mmp27	59.5982	3.45066	0.876532	3.93671	8.26049e-05	0.00353145
Reg3b	16.6633	3.44503	1.13527	3.03455	0.00240897	0.0441224
Chad	199.944	3.41418	0.672906	5.07379	3.89972e-07	4.57946e-05
Artn	220.531	3.39156	0.499673	6.78755	1.1405e-11	4.80929e-09
Klk10	957.861	3.37361	0.662683	5.09084	3.56483e-07	4.323e-05
Serpina3n	1365.46	3.35265	0.622517	5.38564	7.21882e-08	1.10693e-05
Cyp26b1	1756.88	3.33506	0.550659	6.05648	1.39131e-09	3.65067e-07
Prelp	3205.73	3.28318	0.1932	16.9937	9.1451e-65	1.69678e-60
Serpinb2	40.0467	3.27967	0.762971	4.29855	1.71919e-05	0.001074
Muc13	126.587	3.27058	0.767605	4.26075	2.03738e-05	0.00123535
Klk13	254.133	3.26287	0.619211	5.26939	1.36874e-07	1.88116e-05
Apol8	136.517	3.25531	0.317334	10.2583	1.08581e-24	4.02921e-21
Clec3b	445.898	3.25426	0.793199	4.1027	4.08362e-05	0.00207015
Kcns1	1013.78	3.23894	0.812536	3.98621	6.71369e-05	0.00302344
Shank1	472.547	3.22798	0.311019	10.3787	3.09868e-25	1.43732e-21
Masp1	697.632	3.19802	0.410133	7.79753	6.31286e-15	4.18317e-12
Rad51b	402.664	3.19275	0.452366	7.05789	1.69049e-12	8.25404e-10
Cyp26a1	1058.75	3.13615	0.650801	4.81891	1.44341e-06	0.000138762
Bhlhe22	96.5859	3.09132	0.754136	4.09916	4.14659e-05	0.00208498
Fosl1	275.753	3.07296	0.563078	5.45742	4.83097e-08	8.22328e-06
Barx2	1136.64	3.06906	0.336365	9.1242	7.22663e-20	1.15841e-16
Cxcl13	25.9104	3.06558	0.978174	3.13398	0.00172452	0.0345537
A630023A22Rik	26.9814	3.06141	0.729976	4.19385	2.74264e-05	0.00158034
Loxl4	617.85	3.05482	0.497063	6.14573	7.95971e-10	2.3442e-07
Gli1	497.905	3.04001	0.680259	4.46889	7.8625e-06	0.000544331
Ogn	397.896	3.01605	0.911547	3.30872	0.000937245	0.0224672
Bst1	300.651	2.99499	0.663116	4.51654	6.28571e-06	0.000457354
Reg1	13.2873	2.96646	0.724452	4.09477	4.22587e-05	0.00210206
Bmp6	93.7287	2.95818	0.486551	6.0799	1.20257e-09	3.28124e-07
Ret	155.766	2.94821	0.545092	5.40865	6.35019e-08	1.00768e-05
Vtn	53.8306	2.93533	0.794991	3.69228	0.000222248	0.00776572
Sncg	30.1086	2.92159	0.558525	5.23091	1.68678e-07	2.23547e-05
Bnc1	748.286	2.91847	0.491586	5.93684	2.90571e-09	6.57596e-07
Gna14	494.45	2.91249	0.569962	5.10997	3.22209e-07	4.03937e-05
Krt6b	6981.24	2.89938	0.882147	3.28673	0.00101359	0.0238657
Itga11	498.229	2.86258	0.360381	7.94321	1.97011e-15	1.4059e-12
Slc13a2	161.635	2.86081	0.759291	3.76774	0.000164732	0.00629209
Ltf	25258.5	2.85782	0.683185	4.18308	2.87588e-05	0.00163678
Efemp1	303.949	2.84523	0.790912	3.59741	0.000321402	0.0101763
Dpt	988.023	2.84176	0.848321	3.34986	0.000808518	0.020272
Ly6k	211.857	2.84055	0.553235	5.13443	2.82994e-07	3.59635e-05
Akr1c18	102.756	2.83473	0.742076	3.82001	0.000133449	0.0052681
Lgi3	44.6601	2.82885	0.786044	3.59884	0.000319644	0.0101583
Kcnq1	114.01	2.8162	0.472885	5.95536	2.59499e-09	6.25292e-07
Wfdc17	120.96	2.80218	0.444994	6.29712	3.03222e-10	9.87015e-08
Smoc1	2749.79	2.802	0.535035	5.23705	1.63167e-07	2.17798e-05
Mgam	86.0996	2.78801	0.887364	3.1419	0.00167856	0.033926
Apod	5429.14	2.76939	0.559681	4.94816	7.49187e-07	8.1289e-05
Ccn2	7194.42	2.74508	0.805146	3.40941	0.000651025	0.0176595
Ankrd1	35.9874	2.73326	0.628866	4.34634	1.38431e-05	0.00088567
Ntng1	333.285	2.70878	0.617366	4.38764	1.14588e-05	0.000756605
Edn2	108.359	2.68859	0.819584	3.28043	0.00103648	0.0242176
Dlk2	196.532	2.67332	0.845932	3.16021	0.00157655	0.0323577
Rbpjl	93.7077	2.67305	0.638853	4.18413	2.86259e-05	0.00163423
Lrrc32	1644.44	2.66132	0.467183	5.69654	1.22264e-08	2.41328e-06
Mmp9	753.51	2.64013	0.85288	3.09555	0.00196449	0.0379678
Odaph	119.906	2.63972	0.747641	3.53073	0.000414422	0.012307
Krt14	103765	2.63861	0.43274	6.09745	1.07775e-09	3.02978e-07
C4b	4056.86	2.63002	0.309412	8.50004	1.8953e-17	2.06855e-14
Csn2	1421.85	2.60631	0.798369	3.26455	0.0010964	0.0251143
Mapk15	116.12	2.58848	0.266932	9.69714	3.10071e-22	8.21866e-19
Fxyd4	298.787	2.58682	0.747031	3.4628	0.000534586	0.0152361
Sema5b	84.2345	2.58471	0.698555	3.70008	0.000215527	0.00761184
Tenm2	868.906	2.57901	0.653061	3.9491	7.84449e-05	0.00338879
Pcsk9	130.526	2.57529	0.72794	3.53778	0.000403503	0.0121536
Aqp1	341.238	2.57222	0.508739	5.05606	4.28009e-07	4.9633e-05
Vsnl1	243.355	2.56891	0.545766	4.70698	2.51411e-06	0.000214962
Msln	40.969	2.54311	0.713285	3.56535	0.000363368	0.0111437
Wfdc12	1570.25	2.52071	0.778201	3.23914	0.00119889	0.0268325
Slpi	12482.5	2.50782	0.681174	3.68161	0.000231765	0.00802269
Fut1	101.693	2.50217	0.759051	3.29645	0.000979168	0.0232618
Prtn3	144.611	2.4833	0.769392	3.22761	0.00124829	0.0276382
Ccn5	286.392	2.46309	0.355228	6.93382	4.09631e-12	1.80959e-09
Cdh15	71.2177	2.45635	0.790248	3.10833	0.00188147	0.0367074
Rrad	183.351	2.44693	0.482996	5.06614	4.05958e-07	4.7372e-05
Snx22	74.9528	2.42765	0.676901	3.58642	0.000335249	0.0105586
Adrb2	421.397	2.42191	0.265552	9.12029	7.49215e-20	1.15841e-16
Trp73	613.688	2.40151	0.490447	4.89657	9.75224e-07	9.94193e-05
Lyve1	73.1981	2.38047	0.780002	3.05187	0.00227418	0.0423646
Cd80	65.7956	2.36761	0.592338	3.99705	6.41356e-05	0.00294448
Slc9a2	82.8797	2.36387	0.634662	3.7246	0.000195622	0.00710503
Chrdl2	59.7456	2.36328	0.654491	3.61087	0.000305169	0.00981299
Sod3	270.167	2.35598	0.750824	3.13785	0.00170189	0.0343181
Dmbt1	1364.9	2.35182	0.740021	3.17804	0.00148275	0.0313693
Dysf	1074.69	2.3343	0.485177	4.81123	1.50002e-06	0.000142725
Ifitm10	336.228	2.33343	0.5662	4.1212	3.76898e-05	0.00196985
Itgbl1	196.995	2.31803	0.710186	3.26397	0.00109862	0.0251341
Sectm1a	102.648	2.31555	0.698436	3.31534	0.000915326	0.0221048
Cpne4	88.4672	2.31501	0.722027	3.20627	0.00134468	0.029039
Rgs5	1512.27	2.3139	0.73163	3.16266	0.00156334	0.0322291
Fut2	55.1503	2.29489	0.693224	3.31047	0.000931403	0.0223561
Ptprz1	737.908	2.28759	0.557128	4.10604	4.02507e-05	0.00205733
Rtl3	134.229	2.2821	0.570922	3.99722	6.40899e-05	0.00294448
Hsf2bp	20.9007	2.27861	0.559178	4.07494	4.60267e-05	0.00224142
Gsta3	41.9863	2.26516	0.670579	3.37792	0.000730354	0.0190323
Nqo1	1983.36	2.24758	0.484307	4.64081	3.47044e-06	0.000281182
Tcp11	42.0582	2.24669	0.492156	4.565	4.99486e-06	0.000379814
Tmem132e	77.5016	2.24658	0.637535	3.52385	0.000425322	0.012566
Chl1	947.063	2.2432	0.524889	4.27366	1.92286e-05	0.00118528
Scube3	797.907	2.2429	0.544364	4.12021	3.78528e-05	0.00197281
Tnfrsf11b	912.293	2.2422	0.618613	3.62457	0.000289448	0.00945486
Fibin	1470.86	2.24168	0.604799	3.70649	0.000210148	0.00748385
Medag	1341.02	2.22252	0.578852	3.83953	0.000123271	0.00491863
Col11a2	1054.04	2.2156	0.659975	3.35709	0.000787662	0.020042
Adh7	643.796	2.21101	0.538835	4.10331	4.07276e-05	0.00207015
Sulf1	833.268	2.21036	0.347854	6.35428	2.09406e-10	7.19504e-08
Rnf125	119.025	2.19922	0.490889	4.48007	7.46169e-06	0.00052441
Adcy2	245.924	2.19377	0.363138	6.04116	1.53013e-09	3.88904e-07
Atp6v0a4	489.308	2.19296	0.431746	5.07928	3.7887e-07	4.50612e-05
Ly6c1	1229.22	2.18774	0.526117	4.15828	3.20646e-05	0.00177062
Ackr3	1371.47	2.18193	0.197576	11.0435	2.35753e-28	2.16215e-24
Ngef	1007.25	2.18094	0.380661	5.72935	1.00813e-08	2.05548e-06
Angpt1	448.496	2.17162	0.480061	4.52363	6.07868e-06	0.000447555
Sp6	136.116	2.15977	0.671715	3.2153	0.00130306	0.0286797
Hs3st1	237.21	2.14066	0.463597	4.61749	3.88402e-06	0.000309288
Efcab1	267.231	2.13796	0.449204	4.75943	1.94138e-06	0.000175709
Mn1	122.594	2.13037	0.517753	4.11465	3.87764e-05	0.00200874
Gjb2	2203.54	2.12794	0.468548	4.54157	5.5836e-06	0.000414392
Rtn4rl1	92.3628	2.12055	0.470745	4.50468	6.64746e-06	0.00047991
Flt4	121.47	2.11549	0.347758	6.08323	1.17785e-09	3.26176e-07
Lgr5	448.231	2.10756	0.531691	3.96389	7.37394e-05	0.00323442
Kit	4116.38	2.10104	0.626532	3.35344	0.000798131	0.0201751
Ccl6	451.966	2.09105	0.56748	3.68479	0.000228887	0.00795275
Fndc5	270.763	2.07786	0.600347	3.4611	0.000537965	0.0152704
Ifi205	353.891	2.07221	0.664738	3.11734	0.00182491	0.0360975
Gpr68	118.743	2.05862	0.566784	3.6321	0.000281121	0.00924807
Scx	149.167	2.0566	0.640629	3.21028	0.00132605	0.0288494
Runx3	630.878	2.05533	0.339398	6.05583	1.39699e-09	3.65067e-07
Arhgap44	444.386	2.04402	0.534744	3.82243	0.000132142	0.00523882
Saa2	250.421	2.04326	0.621146	3.28949	0.00100368	0.0236924
Gprc5a	520.079	2.03374	0.467534	4.34992	1.36186e-05	0.00087811
Syt8	359.287	2.02734	0.664664	3.05017	0.00228712	0.0425203
Kif26a	880.96	2.02382	0.490822	4.12332	3.73443e-05	0.00195731
Nbl1	1953.86	1.99964	0.337402	5.92659	3.09289e-09	6.91392e-07
Scn7a	203.528	1.98862	0.496562	4.00479	6.20736e-05	0.00287928
Rasgrp3	111.802	1.97939	0.518649	3.81643	0.000135395	0.0053084
Hcn4	130.662	1.97758	0.600394	3.29381	0.000988406	0.0234213
Gpnmb	160.54	1.97701	0.526108	3.75781	0.00017141	0.0064523
Wdr72	121.708	1.97239	0.281173	7.01486	2.30176e-12	1.09505e-09
Calml3	3048.95	1.97223	0.393781	5.00845	5.48711e-07	6.24588e-05
2310034G01Rik	34.065	1.95573	0.473066	4.13416	3.56257e-05	0.00189943
Muc1	1001.36	1.95342	0.589858	3.31167	0.000927401	0.0222889
Scel	167.884	1.95251	0.634052	3.07942	0.00207407	0.0396091
Hbegf	2248.6	1.9472	0.400995	4.85593	1.19822e-06	0.000120825
Mybpc2	70.6742	1.94613	0.544742	3.57257	0.000353497	0.0109862
Htra1	5423.31	1.94098	0.380809	5.09698	3.4511e-07	4.24052e-05
Trpv4	471.276	1.93941	0.546853	3.54649	0.000390395	0.011797
Anxa8	9158.76	1.93045	0.596613	3.23569	0.0012135	0.0270291
C3	7458.01	1.92042	0.396952	4.83793	1.31199e-06	0.000131582
Atp2b4	1518.76	1.91792	0.419156	4.57568	4.74675e-06	0.000365441
Gramd2	358.304	1.91123	0.484219	3.94704	7.91234e-05	0.00340616
Flrt2	859.605	1.90124	0.549534	3.45972	0.000540728	0.0152704
P4ha3	307.89	1.89723	0.431686	4.39492	1.10812e-05	0.000739571
Adamtsl2	78.7779	1.89691	0.487705	3.88946	0.000100466	0.00416303
Rnf150	818.257	1.89437	0.455971	4.15458	3.25883e-05	0.0017942
Pakap	695.484	1.8913	0.505748	3.7396	0.00018431	0.00678509
Spib	79.4252	1.88612	0.420606	4.48429	7.31569e-06	0.00051902
Car12	12013.1	1.87394	0.452859	4.13801	3.50325e-05	0.00188395
Tubb3	196.141	1.873	0.509364	3.67713	0.00023587	0.00813443
Bmp2	143.91	1.87112	0.397808	4.70357	2.55653e-06	0.000216701
Slc27a3	1448.85	1.86448	0.412631	4.51852	6.22747e-06	0.0004549
Sdr16c5	32.8249	1.85515	0.541548	3.42564	0.000613361	0.0168809
Susd2	430.472	1.85511	0.524827	3.53471	0.000408226	0.0122362
Egr4	89.2073	1.84856	0.590367	3.1312	0.00174092	0.0347698
Ptch1	1476.7	1.84582	0.46328	3.98424	6.76971e-05	0.00303394
Postn	55928.5	1.84192	0.400245	4.60197	4.18506e-06	0.000329024
Lynx1	885.165	1.82778	0.379689	4.8139	1.48016e-06	0.000141561
Krt5	64241.2	1.81893	0.458419	3.96784	7.25284e-05	0.00319642
Celsr1	1957.52	1.81836	0.356115	5.10612	3.28846e-07	4.06761e-05
Foxo6	188.709	1.8086	0.530635	3.40836	0.000653536	0.0177018
Igf1r	847.203	1.8078	0.377794	4.78515	1.70864e-06	0.000157831
Kif26b	3175.57	1.80757	0.304469	5.93681	2.90627e-09	6.57596e-07
Pde8a	108.809	1.80401	0.49884	3.61642	0.000298711	0.00965555
Cd69	65.6622	1.79699	0.579124	3.10295	0.00191604	0.0372407
Htra3	861.32	1.79259	0.567078	3.1611	0.00157173	0.0323302
Nt5e	2337.57	1.78859	0.543892	3.28851	0.00100718	0.0237449
Scn1b	449.654	1.78801	0.308929	5.78779	7.13188e-09	1.4868e-06
Gfra1	1693.65	1.78581	0.438377	4.0737	4.62725e-05	0.00224749
Prrg3	149.231	1.78333	0.506451	3.52122	0.000429561	0.012671
Klrg2	187.101	1.77665	0.401822	4.42149	9.80246e-06	0.000663776
Fam81a	60.9362	1.77513	0.36104	4.9167	8.80141e-07	9.12298e-05
Il18	69.969	1.73448	0.455502	3.80784	0.000140188	0.0054644
Foxc1	2198.69	1.73395	0.539902	3.2116	0.00132	0.0288472
Col17a1	20095.1	1.73188	0.419234	4.13106	3.61101e-05	0.00191973
Timp3	13232.3	1.7191	0.540099	3.18294	0.00145787	0.0310958
Ntn4	1018.73	1.717	0.494707	3.47074	0.000519019	0.0148609
Tmem221	74.5394	1.71174	0.497257	3.44238	0.000576628	0.0161369
Ccl9	607.531	1.70739	0.472228	3.61561	0.000299636	0.0096686
Nr4a2	1002.86	1.70427	0.473571	3.59876	0.000319738	0.0101583
Scn8a	27.2637	1.70289	0.471764	3.60963	0.000306635	0.00983498
Cfap157	25.0069	1.70258	0.519921	3.27469	0.00105777	0.0244711
Notum	165.324	1.70122	0.410395	4.14534	3.39317e-05	0.00184624
Whrn	317	1.70082	0.427507	3.97846	6.93619e-05	0.00309361
Clic3	107.152	1.69569	0.42214	4.0169	5.89699e-05	0.00276994
Hhat	399.25	1.68122	0.236828	7.09893	1.25722e-12	6.30446e-10
Creb3l3	91.1049	1.67809	0.552669	3.03634	0.00239472	0.0439209
Clec11a	966.695	1.67282	0.55138	3.03388	0.00241429	0.0441327
Gm13889	231.403	1.6722	0.415363	4.02586	5.67666e-05	0.00267322
Pdzk1ip1	615.198	1.66825	0.419649	3.97535	7.02763e-05	0.00311939
Bco2	46.6121	1.66472	0.376648	4.41982	9.87818e-06	0.000666472
Hspb2	58.9326	1.66367	0.399862	4.1606	3.17409e-05	0.00175797
Epha3	321.62	1.66259	0.450823	3.68791	0.000226106	0.00787086
Adam12	2186.85	1.65025	0.487857	3.38266	0.000717877	0.0188128
Adora1	71.723	1.63704	0.529397	3.09228	0.00198628	0.038349
Nrp2	1584.4	1.63406	0.538596	3.03392	0.00241396	0.0441327
Unc13a	194.639	1.63172	0.502411	3.24778	0.00116309	0.0262529
Hp	5920.48	1.63093	0.496825	3.28271	0.00102813	0.0240555
Foxred2	220.277	1.61595	0.334301	4.83383	1.3393e-06	0.000132884
Prss12	832.89	1.61482	0.483673	3.33866	0.000841833	0.0207153
Cxcl17	131.116	1.60676	0.400223	4.01466	5.95319e-05	0.00277526
Rgcc	492.763	1.6062	0.448124	3.58426	0.00033803	0.0105616
Them6	217.502	1.60329	0.334986	4.78615	1.70013e-06	0.000157831
Peli2	427.672	1.60296	0.24389	6.57246	4.94895e-11	1.95368e-08
Nfatc1	692.415	1.60291	0.274337	5.84284	5.1318e-09	1.08199e-06
Amigo2	73.9258	1.59933	0.453124	3.52956	0.000416258	0.0123375
Lbp	994.481	1.58713	0.429647	3.69404	0.000220716	0.00772673
Id1	1527.14	1.58155	0.376635	4.19917	2.6789e-05	0.00156188
Krt79	10451.6	1.57196	0.478492	3.28524	0.00101897	0.0239266
Abi3bp	428.677	1.56414	0.388445	4.02668	5.65703e-05	0.00267322
B4galnt3	297.807	1.56278	0.376728	4.14831	3.3494e-05	0.00182779
Sertad4	2604.37	1.55799	0.327547	4.75654	1.96939e-06	0.000176522
Prdm1	1071.63	1.5539	0.285066	5.451	5.00863e-08	8.4482e-06
Reep2	51.0402	1.55341	0.505241	3.07459	0.0021079	0.0400307
Xylt1	1000.7	1.54887	0.472423	3.27856	0.00104338	0.0242592
Naprt	281.597	1.54793	0.263952	5.86442	4.50708e-09	9.612e-07
Eppk1	2128.11	1.54721	0.296937	5.21058	1.88255e-07	2.45978e-05
Porcn	863.88	1.54349	0.387949	3.97858	6.93288e-05	0.00309361
Ctsd	28518.6	1.5421	0.352176	4.37876	1.19356e-05	0.000779763
AI467606	66.5682	1.54018	0.453766	3.39423	0.000688224	0.0182941
Ly6g6c	138.19	1.53897	0.303256	5.0748	3.879e-07	4.57946e-05
Osgin2	924.055	1.53544	0.462778	3.31787	0.000907068	0.0219423
Slc16a11	152.538	1.52164	0.442718	3.43703	0.000588121	0.0163598
Dusp14	637.298	1.51967	0.412658	3.68264	0.000230836	0.00800546
Tmem154	885.487	1.51839	0.390044	3.89287	9.90641e-05	0.00412116
Adamtsl4	1134.84	1.51453	0.42094	3.59797	0.000320716	0.0101719
Adamtsl5	478.997	1.5119	0.372744	4.05613	4.98919e-05	0.00241066
Nedd9	3126	1.50691	0.333361	4.52035	6.17379e-06	0.000452761
Bcam	3040.27	1.50395	0.450779	3.33633	0.000848932	0.0208348
Wnt10a	503.897	1.49031	0.361063	4.12756	3.66628e-05	0.0019325
Prodh	89.5063	1.48715	0.40175	3.70167	0.000214183	0.00758388
Wnt5b	583.169	1.47774	0.474275	3.11578	0.00183456	0.036216
Vamp5	308.501	1.47657	0.40242	3.66923	0.000243279	0.00834343
Depp1	80.5994	1.47421	0.45074	3.27064	0.00107306	0.0247016
Cdk6	1589.03	1.47017	0.412415	3.56479	0.000364142	0.011149
Grasp	439.775	1.44926	0.409084	3.54269	0.000396074	0.0119492
Ntrk2	601.41	1.44905	0.457489	3.1674	0.00153809	0.0321371
Cemip	206.902	1.44782	0.423601	3.41788	0.000631108	0.0172708
Apol7a	399.886	1.43845	0.469898	3.06121	0.00220448	0.0414042
Arhgdig	109.204	1.41636	0.440305	3.21677	0.00129644	0.0285678
Frat2	133.126	1.41611	0.368028	3.84783	0.000119167	0.00479614
Tppp	116.318	1.41599	0.451386	3.13697	0.00170701	0.0343512
Zfp521	404.905	1.41452	0.454382	3.11306	0.0018516	0.0363926
Sostdc1	1615.68	1.41221	0.46852	3.01418	0.00257671	0.0463679
Tent5c	281.086	1.4013	0.405746	3.45365	0.000553049	0.0155474
Cyp2d22	426.581	1.39832	0.385054	3.63148	0.000281805	0.00925419
2024-03-03	421.712	1.39818	0.439852	3.17875	0.00147913	0.0313284
Odc1	6618.61	1.38855	0.343357	4.04406	5.25338e-05	0.00249926
Ggta1	1246.46	1.38326	0.260064	5.31892	1.04382e-07	1.54937e-05
Hrct1	74.2699	1.3775	0.428883	3.21184	0.00131889	0.0288472
Rasl10a	56.9444	1.37351	0.365459	3.75832	0.000171061	0.0064523
Dclk1	1345.85	1.3556	0.359727	3.76843	0.000164277	0.00629209
Runx1	6249.2	1.34208	0.304579	4.40634	1.05131e-05	0.000704189
Pmaip1	340.732	1.34141	0.443388	3.02537	0.00248331	0.0451277
Kif21b	498.391	1.33417	0.307283	4.34182	1.41305e-05	0.000897867
Lrfn3	62.523	1.33392	0.425142	3.13758	0.00170351	0.0343181
Cdk5r1	202.485	1.32776	0.437126	3.03748	0.00238565	0.0438685
Kcnk6	286.314	1.32695	0.413505	3.20902	0.00133187	0.0288685
Tmtc1	336.644	1.31501	0.424426	3.09833	0.00194613	0.037731
Cyp7b1	273.812	1.31231	0.434493	3.02033	0.00252497	0.045661
Atp10a	598.242	1.31101	0.242838	5.39869	6.71296e-08	1.05553e-05
AI464131	509.91	1.29792	0.381612	3.40115	0.000671018	0.0179914
Lurap1l	1362.02	1.2834	0.402545	3.18822	0.00143152	0.0307057
Rab32	387.751	1.27718	0.275006	4.64419	3.41418e-06	0.000278753
Dlc1	1407.74	1.2744	0.420117	3.03344	0.00241782	0.0441538
Xdh	3852.36	1.27316	0.347229	3.66664	0.000245755	0.00839868
Pamr1	125.09	1.27047	0.41203	3.08343	0.0020463	0.0392222
Ctsc	5344.29	1.2672	0.293422	4.31868	1.56966e-05	0.000990591
Tsc22d1	17304.4	1.26233	0.41018	3.0775	0.00208743	0.0397233
Rhbdl3	455.632	1.25308	0.419469	2.9873	0.00281456	0.0493586
Klf4	12737.8	1.25149	0.306505	4.0831	4.44384e-05	0.00219869
Runx2	1325.37	1.24403	0.235066	5.29224	1.2083e-07	1.71135e-05
Pde7a	1687.68	1.24186	0.366348	3.38983	0.00069935	0.0184577
Mmp28	195.84	1.23495	0.362822	3.40373	0.000664736	0.017886
Eva1a	326.431	1.2303	0.361405	3.40421	0.000663557	0.017886
D16Ertd472e	854.379	1.2269	0.245877	4.9899	6.04097e-07	6.75205e-05
Slc35e4	924.871	1.22318	0.238814	5.12188	3.02503e-07	3.81812e-05
Adarb1	487.875	1.19941	0.390935	3.06806	0.0021545	0.0407074
Slc2a6	45.1276	1.19332	0.38671	3.08583	0.00202984	0.0389872
Dusp1	18606.7	1.18855	0.286288	4.15159	3.30175e-05	0.00181244
B3gnt8	327.334	1.18816	0.352456	3.37109	0.000748714	0.0194078
Degs1	2545.53	1.18474	0.195808	6.05053	1.44366e-09	3.72023e-07
Dbndd2	1885.03	1.18163	0.351127	3.36525	0.000764742	0.0196796
Cacna1a	278.384	1.18036	0.368277	3.20508	0.00135023	0.0290628
Scara5	1291.18	1.17822	0.301083	3.91327	9.10533e-05	0.0038483
1190005I06Rik	276.221	1.17102	0.370143	3.16369	0.0015578	0.0322233
Crabp2	2539.65	1.16522	0.365733	3.18597	0.00144268	0.0308736
Aff3	309.474	1.16499	0.298054	3.90865	9.28116e-05	0.00390482
Kcne3	490.408	1.15426	0.381374	3.02659	0.00247328	0.0449894
Tcf7	951.461	1.14425	0.367387	3.11456	0.00184218	0.0363228
Nrbp2	2639.3	1.1393	0.352045	3.23624	0.00121116	0.0270207
Krt80	659.433	1.12801	0.308279	3.65906	0.000253141	0.00855662
Klf11	1091.9	1.12576	0.215696	5.21918	1.7972e-07	2.36491e-05
Lgr4	2659.3	1.12431	0.33616	3.34457	0.000824089	0.0204687
Sertad1	1631.97	1.12254	0.333525	3.36568	0.000763561	0.0196765
Mfsd13a	308.726	1.11486	0.353395	3.15471	0.00160656	0.0328645
Otud1	147.335	1.11167	0.224173	4.959	7.08574e-07	7.77922e-05
Slc35e3	836.621	1.11146	0.345901	3.21323	0.0013125	0.0288459
Anxa11	1243.27	1.10766	0.252814	4.38132	1.1796e-05	0.000773366
Tnfaip3	1880.48	1.09997	0.327561	3.35807	0.000784898	0.020042
Slc39a14	3849.51	1.09839	0.334864	3.28011	0.00103767	0.0242176
Nphp1	572.622	1.09715	0.344701	3.1829	0.00145809	0.0310958
Hspa2	1125.96	1.09004	0.193847	5.6232	1.87454e-08	3.54901e-06
Epha2	2976.03	1.08554	0.338548	3.20647	0.00134375	0.029039
Asic1	131.944	1.07418	0.328714	3.26781	0.00108384	0.0248572
Ucp2	11302.5	1.07324	0.327624	3.27583	0.00105354	0.0244171
Dnajb1	6958.42	1.07048	0.285889	3.74438	0.000180843	0.00670136
Nfil3	2439.09	1.06766	0.226426	4.71524	2.41422e-06	0.000208342
Cavin1	5582.36	1.06387	0.301181	3.53233	0.000411912	0.0122964
Ovol2	132.367	1.06174	0.268842	3.9493	7.83798e-05	0.00338879
Tiparp	1261.44	1.05175	0.310146	3.39115	0.000695992	0.0184215
Tmem8	170.199	1.03912	0.321811	3.22898	0.00124233	0.0275391
Fosl2	7250.41	1.03098	0.29915	3.44637	0.000568168	0.0159483
Slc35g1	649.145	1.02338	0.289733	3.53213	0.000412222	0.0122964
Ksr1	444.564	1.02048	0.310714	3.28432	0.00102228	0.0239487
Gnb1l	280.813	1.01727	0.323357	3.14596	0.00165544	0.0336744
Ajuba	2677.28	1.01412	0.307718	3.2956	0.000982119	0.0233021
2024-09-06	641.663	-1.00915	0.289864	-3.48148	0.000498658	0.0144114
Zhx1	407.148	-1.01157	0.318843	-3.17262	0.0015107	0.0317796
Rbm12b1	178.289	-1.01442	0.262372	-3.86635	0.000110477	0.00453493
Cxxc5	1126.53	-1.01461	0.247956	-4.09188	4.27884e-05	0.00212272
Rab3ip	856.022	-1.01787	0.218081	-4.66741	3.05022e-06	0.000252651
Sh3bp5	652.793	-1.02731	0.251777	-4.08025	4.49866e-05	0.00221372
Plekhh1	963.905	-1.02846	0.295973	-3.47484	0.000511167	0.0146814
Med18	112.425	-1.03266	0.252069	-4.09674	4.19011e-05	0.00208987
Asb1	237.161	-1.03335	0.300451	-3.43933	0.000583151	0.0162459
Myh14	3940.3	-1.03697	0.327609	-3.16525	0.00154949	0.0322204
Lzts3	364.869	-1.03744	0.251188	-4.13013	3.62562e-05	0.00192199
Cd164	10723	-1.04626	0.28867	-3.62442	0.000289606	0.00945486
Zfp870	146.153	-1.06273	0.252527	-4.20838	2.57208e-05	0.001515
D3Ertd751e	124.372	-1.06329	0.266572	-3.98877	6.64181e-05	0.00300745
Tpd52l1	293.713	-1.06394	0.316292	-3.36378	0.000768818	0.0197571
Tbc1d16	732.076	-1.07207	0.338454	-3.16754	0.00153736	0.0321371
Bcat2	610.393	-1.07514	0.329781	-3.26016	0.0011135	0.0253497
Map1b	1452.11	-1.0759	0.316259	-3.40194	0.000669096	0.0179659
Slc25a23	947.785	-1.08014	0.340781	-3.1696	0.00152647	0.0320468
Snx10	942.492	-1.08485	0.282013	-3.84681	0.000119665	0.00480577
Slc7a5	2008.08	-1.10388	0.283307	-3.89643	9.76199e-05	0.0040702
Cnn3	9081.49	-1.10426	0.195178	-5.65769	1.53422e-08	2.9652e-06
Kyat3	110.86	-1.10527	0.360624	-3.06489	0.00217753	0.0409876
Atp8a1	697.721	-1.10907	0.330985	-3.35082	0.000805725	0.020272
Trp53inp2	2602.98	-1.12681	0.304366	-3.70217	0.000213764	0.0075835
Prkar2b	1027.49	-1.12789	0.338478	-3.33224	0.000861509	0.0210876
Tinagl1	1933.04	-1.13664	0.295134	-3.85127	0.000117508	0.00475
Abca3	1465.39	-1.13961	0.20754	-5.49103	3.99601e-08	7.06115e-06
Mapk12	172.651	-1.14906	0.267596	-4.29402	1.75468e-05	0.0010925
Tfap2b	1126.49	-1.15207	0.381744	-3.01792	0.00254516	0.0459815
Dnajc12	156.605	-1.15648	0.347811	-3.32503	0.000884086	0.0215833
Fgf1	859.259	-1.15933	0.223389	-5.18975	2.1058e-07	2.71326e-05
Ccdc92	358.771	-1.16505	0.325575	-3.57843	0.000345661	0.0107607
Ptges3l	121.31	-1.1654	0.310624	-3.7518	0.000175572	0.00656765
Basp1	4641.47	-1.17026	0.297409	-3.93487	8.32411e-05	0.00354233
Nipal4	131.236	-1.17236	0.313359	-3.74126	0.0001831	0.00675395
Abcc3	468.09	-1.1769	0.350652	-3.35631	0.000789894	0.0200488
Lpar6	454.671	-1.17759	0.333026	-3.53603	0.000406193	0.012195
Tspyl4	118.028	-1.17766	0.393257	-2.99464	0.0027477	0.0486459
Abca5	459.901	-1.17839	0.261524	-4.50585	6.61072e-06	0.000479123
Aldh3a2	1560.35	-1.18562	0.239241	-4.95577	7.20461e-07	7.8632e-05
Dock5	1638.17	-1.18635	0.263738	-4.4982	6.85316e-06	0.000489052
Dbt	595.75	-1.18785	0.223735	-5.30919	1.10111e-07	1.60866e-05
Zfp799	211.781	-1.1906	0.338846	-3.51368	0.000441938	0.0129948
Zfp40	94.607	-1.19107	0.397864	-2.99365	0.00275661	0.0487012
Cystm1	606.741	-1.19272	0.344238	-3.46482	0.000530589	0.0151455
Capn5	1476.54	-1.19778	0.380074	-3.15143	0.00162474	0.0331633
Iqgap2	625.371	-1.20208	0.326749	-3.67891	0.000234235	0.00809312
Chsy3	385.265	-1.21392	0.383996	-3.16128	0.00157077	0.0323302
4930412O13Rik	106.227	-1.21434	0.388284	-3.12746	0.00176321	0.0349889
Tlr6	101.105	-1.21595	0.378852	-3.20955	0.00132943	0.0288494
Fads6	220.859	-1.22647	0.409722	-2.99342	0.0027587	0.0487012
Hectd2	388.353	-1.23466	0.373246	-3.30789	0.000940019	0.0225047
Bcl6b	139.88	-1.24174	0.402868	-3.08225	0.00205443	0.0392969
Agps	4845.37	-1.242	0.331756	-3.74372	0.000181313	0.00670136
Npas2	174.457	-1.24287	0.278063	-4.46975	7.83104e-06	0.000544184
Lurap1	322.992	-1.24295	0.362153	-3.4321	0.000598916	0.0166352
Spsb4	139.898	-1.26099	0.390989	-3.22513	0.00125916	0.0278455
Gm5124	46.4432	-1.26676	0.42131	-3.00671	0.00264093	0.0472064
Stambpl1	465.427	-1.26727	0.28877	-4.38849	1.14138e-05	0.000756326
Rasef	343.953	-1.26933	0.392864	-3.23097	0.00123372	0.0273809
P2rx7	723.637	-1.27297	0.422189	-3.01517	0.00256836	0.0462654
Il15	101.702	-1.28909	0.261758	-4.92474	8.4473e-07	8.80512e-05
Nr3c2	346.119	-1.29087	0.422782	-3.05328	0.00226352	0.0423361
Pde7b	272.73	-1.29707	0.414591	-3.12855	0.0017567	0.034897
Slco2a1	7044.77	-1.30213	0.35195	-3.69977	0.000215793	0.00761184
Dusp4	2217.94	-1.30479	0.350324	-3.72453	0.000195681	0.00710503
Sort1	1986.86	-1.31137	0.307376	-4.26636	1.98688e-05	0.00121265
Ugt1a6a	887.059	-1.31288	0.32164	-4.08183	4.46832e-05	0.00220492
P2rx3	40.1854	-1.31844	0.362831	-3.63374	0.000279339	0.00921641
Tnfrsf21	1715.65	-1.32973	0.305852	-4.34764	1.37607e-05	0.000883448
Mapk11	191.977	-1.33191	0.31271	-4.25927	2.05099e-05	0.00123955
Rbm24	75.9891	-1.33793	0.43977	-3.04235	0.0023474	0.043337
Lcp1	1802.44	-1.34184	0.280228	-4.78837	1.68139e-06	0.000157831
Etv5	1756.48	-1.35832	0.43777	-3.10283	0.00191683	0.0372407
Arfgef3	217.501	-1.36476	0.419455	-3.25365	0.00113932	0.0258029
Sgsm1	215.118	-1.38107	0.437659	-3.15559	0.00160176	0.0328024
Cdk18	1824.18	-1.38936	0.256883	-5.40853	6.35438e-08	1.00768e-05
Gata3	2895.61	-1.39056	0.336991	-4.1264	3.68483e-05	0.00193678
Ccdc170	94.8104	-1.40488	0.430569	-3.26284	0.00110302	0.0251727
Myo5c	1103.52	-1.40514	0.412088	-3.40979	0.000650119	0.0176595
Aldh1b1	68.877	-1.41936	0.392826	-3.61321	0.000302434	0.00974193
Kcnma1	52.5948	-1.42388	0.460681	-3.09082	0.00199603	0.0384905
Btc	232.977	-1.43861	0.420244	-3.42327	0.000618722	0.0169819
Svil	6522.47	-1.46254	0.389562	-3.75432	0.000173813	0.00651501
Pabpc4l	63.8807	-1.4647	0.467993	-3.12974	0.00174962	0.0348814
Itga9	656.195	-1.4662	0.467938	-3.13332	0.0017284	0.034594
Hc	377.906	-1.47246	0.418404	-3.51923	0.000432795	0.0127461
Fam210b	2219.59	-1.47284	0.321798	-4.5769	4.71917e-06	0.000364831
Mtmr7	790.676	-1.47366	0.390474	-3.77401	0.000160642	0.00619657
Lrrc75b	483.027	-1.48976	0.470991	-3.16304	0.00156132	0.0322233
Slc2a4	183.051	-1.49168	0.464563	-3.21094	0.00132303	0.0288494
Bmpr1b	162.503	-1.50225	0.493606	-3.04343	0.00233899	0.0432678
C130074G19Rik	230.124	-1.51217	0.456515	-3.31242	0.000924923	0.0222581
Tspan1	479.698	-1.52779	0.468331	-3.2622	0.00110551	0.0251987
Gipc2	900.937	-1.53001	0.371567	-4.11772	3.82638e-05	0.00198865
Vill	2556.44	-1.53429	0.386073	-3.97411	7.06443e-05	0.00312825
Oxct1	3545.12	-1.5351	0.343079	-4.47449	7.65936e-06	0.000534254
Csdc2	301.564	-1.53687	0.459432	-3.34516	0.000822358	0.0204531
Fam43a	1092.23	-1.55901	0.388816	-4.00965	6.081e-05	0.00282774
Adcy5	210.619	-1.56249	0.440104	-3.55027	0.000384842	0.0116482
Tmem200b	292.16	-1.57535	0.293663	-5.36446	8.11909e-08	1.23477e-05
Ptpn7	112.651	-1.58574	0.525861	-3.01551	0.00256551	0.046259
Foxa1	3079.09	-1.59124	0.469634	-3.38825	0.000703399	0.0185119
Enho	431.887	-1.59839	0.340596	-4.69292	2.6933e-06	0.000227143
Il18r1	631.218	-1.62891	0.431233	-3.77734	0.00015851	0.00615272
Dmpk	445.738	-1.63288	0.466108	-3.50323	0.00045965	0.0134516
Plcb4	410.915	-1.64469	0.442773	-3.71452	0.000203591	0.0073206
Krt19	31511.2	-1.64989	0.23622	-6.98454	2.85781e-12	1.3256e-09
Filip1	156.777	-1.65951	0.483778	-3.43031	0.000602882	0.0166705
Ramp3	74.5007	-1.66038	0.363598	-4.56651	4.95904e-06	0.000379659
Jsrp1	32.4901	-1.68014	0.562036	-2.98939	0.00279535	0.049161
Scml4	768.842	-1.6861	0.562354	-2.99829	0.00271501	0.048159
Adrb1	81.4928	-1.68944	0.546645	-3.09057	0.00199776	0.0384905
Prom1	1201.81	-1.73098	0.578962	-2.9898	0.00279158	0.049161
Cbs	251.823	-1.73902	0.437306	-3.97666	6.98894e-05	0.00310966
Cacng4	66.4104	-1.74908	0.48517	-3.60508	0.000312055	0.00996533
Itga8	865.061	-1.76264	0.512266	-3.44087	0.000579841	0.0162024
Dnaic1	44.2231	-1.77419	0.485693	-3.65291	0.000259282	0.00874674
Dmrta2	68.4754	-1.77443	0.582448	-3.04651	0.00231513	0.0429119
Tmem229a	104.889	-1.77503	0.471401	-3.76544	0.000166255	0.0063211
Ctns	1325.06	-1.77621	0.563513	-3.15203	0.0016214	0.0331316
Mns1	228.346	-1.78152	0.567414	-3.13971	0.00169114	0.034143
Ttc6	970.019	-1.79016	0.534317	-3.35037	0.000807035	0.020272
Il12rb1	40.1012	-1.79034	0.565696	-3.16484	0.00155168	0.0322204
Prss53	154.613	-1.79442	0.363502	-4.93648	7.95458e-07	8.47507e-05
Dpysl3	2221.93	-1.79486	0.450159	-3.98718	6.68629e-05	0.00301843
Adgrg3	292.84	-1.80553	0.511941	-3.52683	0.000420567	0.0124453
Tbx3	1648.62	-1.81183	0.388802	-4.66004	3.16147e-06	0.000260702
Dennd2a	945.589	-1.83622	0.528753	-3.47274	0.000515173	0.0147736
Gatm	113.214	-1.84021	0.287481	-6.40115	1.54208e-10	5.72235e-08
Pkib	30.7049	-1.84123	0.606421	-3.03623	0.0023956	0.0439209
Adcyap1r1	203.754	-1.84384	0.543907	-3.38999	0.00069895	0.0184577
Tgm2	8844.27	-1.85406	0.445455	-4.16217	3.15232e-05	0.00175114
Abca8b	110.144	-1.85548	0.603709	-3.07347	0.00211585	0.0401406
BC030870	80.1679	-1.85839	0.485069	-3.83119	0.000127524	0.00506657
Slc23a1	116.55	-1.87051	0.448895	-4.16691	3.0875e-05	0.0017295
Sdk1	433.559	-1.87666	0.452315	-4.149	3.33926e-05	0.00182763
Tspan13	905.72	-1.88376	0.39657	-4.75014	2.03278e-06	0.00018046
Tbx2	721.243	-1.89183	0.484309	-3.90626	9.37376e-05	0.00393486
Lrrn2	375.35	-1.911	0.610669	-3.12935	0.00175193	0.0348814
Hs3st6	488.501	-1.9267	0.398967	-4.82924	1.37058e-06	0.000134549
Slc14a1	111.131	-1.92913	0.553783	-3.48355	0.000494813	0.0143226
Cd38	144.197	-1.93532	0.531005	-3.64464	0.00026777	0.00892885
Map4k1	290.182	-1.93895	0.464049	-4.17834	2.93645e-05	0.00166106
Trpc6	319.986	-1.94227	0.506101	-3.8377	0.000124191	0.0049447
Rragd	77.2314	-1.9436	0.354331	-5.48526	4.12857e-08	7.22656e-06
Stx1b	48.3984	-1.95062	0.64376	-3.03005	0.00244513	0.0445211
Gm45716	46.0371	-1.95089	0.571664	-3.41265	0.000643353	0.0175283
Mlph	4708.31	-1.96292	0.549657	-3.57117	0.000355395	0.01099
Atp1a2	892.039	-1.97713	0.613968	-3.22024	0.00128082	0.0282573
Capn6	1581.61	-1.98686	0.595403	-3.337	0.000846875	0.0208118
Prlr	4442.95	-1.99055	0.248546	-8.00875	1.15881e-15	8.60025e-13
Foxs1	207.917	-1.99148	0.598823	-3.32565	0.000882117	0.0215636
Padi4	425.848	-1.99204	0.629524	-3.16436	0.00155424	0.0322204
Gstm7	41.0337	-1.99405	0.571986	-3.48619	0.000489952	0.014204
Arhgap40	337.59	-2.00638	0.439963	-4.56034	5.10702e-06	0.000386758
Tril	1983.31	-2.01149	0.588938	-3.41546	0.000636743	0.0173737
Shpk	246.772	-2.01466	0.553403	-3.64049	0.000272118	0.00904815
Cited1	2179.04	-2.01979	0.452537	-4.46326	8.07202e-06	0.000554697
Styk1	73.4544	-2.0286	0.354576	-5.72121	1.05766e-08	2.13303e-06
Cxcl14	2134.75	-2.03669	0.556149	-3.66213	0.000250129	0.0085154
Emilin1	1916.03	-2.04033	0.607652	-3.35774	0.000785839	0.020042
Peg12	70.6353	-2.04331	0.649562	-3.14568	0.00165704	0.0336744
Gm14419	19.8856	-2.04484	0.505041	-4.04887	5.14661e-05	0.00245476
Krt78	206.654	-2.05533	0.682646	-3.01083	0.00260536	0.0467052
Nckap5	322.466	-2.06176	0.520114	-3.96406	7.36846e-05	0.00323442
Mmd	607.356	-2.07073	0.384016	-5.3923	6.95603e-08	1.08456e-05
Mmp16	248.422	-2.0722	0.690432	-3.0013	0.00268826	0.0478217
Angpt2	243.556	-2.07228	0.42006	-4.9333	8.08499e-07	8.47507e-05
Egflam	1297.09	-2.07711	0.584183	-3.55559	0.000377137	0.0114711
Folr1	150.271	-2.08734	0.508925	-4.10146	4.10546e-05	0.00207555
Fam25c	1195.26	-2.08992	0.617113	-3.3866	0.000707637	0.018597
Tuba8	199.531	-2.09061	0.452077	-4.62446	3.7557e-06	0.000301659
Gcnt4	540.676	-2.13083	0.466678	-4.56595	4.97236e-06	0.000379659
Stat5a	2963.38	-2.13432	0.308411	-6.92038	4.50445e-12	1.94362e-09
Add2	129.132	-2.14016	0.536206	-3.99129	6.57138e-05	0.00299352
Sspo	78.2443	-2.14161	0.597259	-3.58574	0.000336124	0.0105586
Slc46a3	189.294	-2.14654	0.449743	-4.77282	1.81669e-06	0.000165229
Gm42417	48.2913	-2.15799	0.678734	-3.17944	0.00147561	0.0312896
Coro6	177.804	-2.16034	0.532497	-4.05699	4.97096e-05	0.00240813
Plk5	32.296	-2.16351	0.583207	-3.70968	0.000207518	0.00741865
Nos2	319.17	-2.17881	0.665148	-3.27567	0.00105412	0.0244171
Doc2b	232.909	-2.18069	0.440947	-4.94547	7.5961e-07	8.19407e-05
P2ry6	152.67	-2.1825	0.673391	-3.24106	0.00119085	0.0267495
Unc5c	304.649	-2.19792	0.402037	-5.46696	4.5781e-08	7.86501e-06
Fxyd2	839.803	-2.20521	0.464786	-4.74458	2.0894e-06	0.000183729
Gm2619	43.5635	-2.21784	0.658318	-3.36895	0.000754558	0.0194987
Fam198b	938.092	-2.22587	0.374232	-5.94783	2.71726e-09	6.38177e-07
Fam131b	73.8095	-2.2503	0.672578	-3.34578	0.00082052	0.0204382
Ggt1	415.066	-2.25432	0.707654	-3.18563	0.00144441	0.0308751
Gria3	327.937	-2.25853	0.634112	-3.56172	0.00036843	0.0112512
Etv4	1014.67	-2.27687	0.431479	-5.27689	1.31393e-07	1.81931e-05
Zbtb46	262.539	-2.29862	0.512872	-4.48187	7.39924e-06	0.000521998
Qprt	31.2249	-2.30402	0.610191	-3.7759	0.000159431	0.00617412
Nes	1791.91	-2.3042	0.49881	-4.61939	3.84876e-06	0.000307801
Gm2792	55.5778	-2.30723	0.553779	-4.16633	3.09542e-05	0.0017295
Liph	88.8823	-2.31195	0.585075	-3.95154	7.76495e-05	0.00338194
9130230L23Rik	126.823	-2.31635	0.521826	-4.43893	9.04086e-06	0.000616706
Slc27a6	118.928	-2.31771	0.581081	-3.98862	6.64577e-05	0.00300745
Proc	160.901	-2.32581	0.604189	-3.84947	0.000118373	0.00477456
Stac2	1058.84	-2.34227	0.531439	-4.4074	1.04618e-05	0.000703288
Chn1	369.184	-2.34288	0.574282	-4.07967	4.51e-05	0.00221372
Inmt	21.191	-2.36016	0.746096	-3.16335	0.00155967	0.0322233
Sytl5	52.3877	-2.36034	0.649614	-3.63345	0.000279662	0.00921641
Cd4	117.249	-2.3794	0.574953	-4.13842	3.49712e-05	0.00188395
Sema7a	1701.12	-2.38222	0.632422	-3.76681	0.000165344	0.00629937
Gata2	111.86	-2.38282	0.694465	-3.43116	0.000601012	0.0166435
Etv1	136.491	-2.3916	0.508477	-4.70347	2.5578e-06	0.000216701
Actg2	643.871	-2.41111	0.774384	-3.11358	0.00184832	0.0363926
Cdo1	1983.51	-2.42361	0.379487	-6.38653	1.69687e-10	6.17328e-08
Wdr86	186.971	-2.42744	0.606853	-4.00005	6.33278e-05	0.00293013
Stc2	3627.67	-2.44862	0.350816	-6.97978	2.95637e-12	1.33786e-09
Arg2	194.349	-2.46169	0.409423	-6.01258	1.82589e-09	4.51701e-07
Slc35f3	139.545	-2.46492	0.554585	-4.44462	8.80487e-06	0.000602825
Morc1	65.3755	-2.47106	0.466298	-5.29932	1.16238e-07	1.66851e-05
Crlf1	122.117	-2.47451	0.663189	-3.73123	0.000190548	0.00695949
Ptn	7502.06	-2.47997	0.304202	-8.15239	3.56811e-16	3.31013e-13
Msx2	452.919	-2.49516	0.316224	-7.89048	3.01033e-15	2.06865e-12
Adig	50.4257	-2.51218	0.449605	-5.58753	2.30324e-08	4.31659e-06
Rem1	149.139	-2.5161	0.617012	-4.07788	4.5448e-05	0.00222491
Meox1	651.182	-2.52035	0.747812	-3.3703	0.000750872	0.0194305
Esrrb	87.8509	-2.52794	0.730412	-3.46097	0.000538229	0.0152704
Crabp1	1622.49	-2.53253	0.42781	-5.91977	3.22392e-09	7.12103e-07
Chst1	309.376	-2.54675	0.478585	-5.32142	1.0296e-07	1.5435e-05
Rassf6	461.083	-2.55703	0.353012	-7.24346	4.37372e-13	2.31857e-10
Tmem56	2024.53	-2.55724	0.303758	-8.41868	3.8076e-17	3.71822e-14
Amn	290.809	-2.58532	0.541427	-4.77501	1.797e-06	0.000164244
Zfp618	304.51	-2.60391	0.693048	-3.75718	0.000171838	0.00645402
Lamc3	1810.25	-2.63685	0.63882	-4.12769	3.66429e-05	0.0019325
Areg	2948.41	-2.64245	0.73019	-3.61885	0.000295919	0.009582
Frem1	2142.99	-2.66727	0.795013	-3.355	0.000793661	0.0201169
Pde11a	317.741	-2.68196	0.456436	-5.87588	4.20615e-09	9.18127e-07
Nrg2	226.21	-2.6871	0.566079	-4.74686	2.06598e-06	0.000182535
Dclk3	164.078	-2.69707	0.731109	-3.68901	0.000225125	0.00785143
Slc12a2	15806.5	-2.71338	0.427915	-6.34094	2.28365e-10	7.70379e-08
Ism2	26.6709	-2.73632	0.754145	-3.62838	0.00028521	0.00934944
Prrx2	686.084	-2.73724	0.80418	-3.40376	0.000664648	0.017886
Lat	67.7382	-2.76955	0.56099	-4.9369	7.93755e-07	8.47507e-05
Cacna1b	58.5053	-2.77216	0.675279	-4.1052	4.03963e-05	0.0020591
Dgki	81.3159	-2.77944	0.576561	-4.82072	1.43039e-06	0.000138226
Anks1b	58.7152	-2.78177	0.786516	-3.53683	0.000404962	0.0121778
Lbhd2	177.126	-2.78963	0.790122	-3.53063	0.000414567	0.012307
Reln	475.226	-2.79956	0.804331	-3.4806	0.000500287	0.014436
Hpca	41.3724	-2.80271	0.551704	-5.0801	3.77227e-07	4.50612e-05
Tmem200a	60.6823	-2.80296	0.793692	-3.53154	0.000413146	0.0123042
Nlrp10	496.784	-2.82759	0.765365	-3.69444	0.000220372	0.00772673
Sema3a	115.623	-2.82965	0.751044	-3.76762	0.000164814	0.00629209
Epyc	580.15	-2.85009	0.925571	-3.07928	0.00207502	0.0396091
Crispld2	3946.19	-2.92511	0.537911	-5.4379	5.39117e-08	8.93106e-06
Rnf182	45.6511	-2.95051	0.794831	-3.71212	0.00020553	0.00737604
Cxcl15	235.409	-2.96442	0.892827	-3.32027	0.000899308	0.0218973
Pcp4	486.612	-2.97176	0.707718	-4.19908	2.68e-05	0.00156188
Sh3gl3	41.7145	-2.99313	0.675446	-4.43133	9.36522e-06	0.000636492
Spdef	200.352	-3.00121	0.567337	-5.29	1.22317e-07	1.7193e-05
Dsg1c	86.9733	-3.006	0.850578	-3.53407	0.000409219	0.0122462
Cma1	88.2412	-3.04691	0.959148	-3.17669	0.00148968	0.0314801
Htra4	112.881	-3.05602	0.883045	-3.46077	0.000538629	0.0152704
Shc3	32.0949	-3.07804	0.677323	-4.54441	5.50887e-06	0.000411441
Cntn1	109.261	-3.10299	0.589415	-5.26452	1.40559e-07	1.9162e-05
Ndst4	115.089	-3.129	0.588039	-5.32108	1.03155e-07	1.5435e-05
Col13a1	711.227	-3.16358	0.740734	-4.27087	1.94708e-05	0.00119623
Unc5a	281.995	-3.16512	0.531676	-5.9531	2.63111e-09	6.25866e-07
Wdr63	51.9447	-3.17043	0.766315	-4.13725	3.51498e-05	0.00188395
Bcl2l15	68.6996	-3.17194	0.743303	-4.26736	1.97802e-05	0.00121123
Cap2	231.679	-3.17967	0.410973	-7.73693	1.01847e-14	6.29889e-12
Pcdh12	256.027	-3.22081	0.515974	-6.2422	4.31459e-10	1.33421e-07
Padi3	222.519	-3.32723	0.666282	-4.99372	5.92278e-07	6.66007e-05
Astn2	312.002	-3.33016	0.359103	-9.27356	1.80041e-20	4.1756e-17
Pgr	1396.86	-3.3608	0.433626	-7.75045	9.15681e-15	5.85846e-12
Gm16485	204.759	-3.37825	0.529975	-6.37436	1.83727e-10	6.43183e-08
Tpsb2	81.4959	-3.39487	0.905686	-3.7484	0.000177966	0.00663047
Msx1	1163	-3.42173	0.647364	-5.28563	1.25274e-07	1.74762e-05
Scube1	598.419	-3.49983	0.45908	-7.62357	2.46763e-14	1.47692e-11
P2rx2	74.1135	-3.50172	1.05538	-3.31797	0.000906742	0.0219423
Kcnab1	41.7916	-3.52352	0.976404	-3.60867	0.000307767	0.00984537
Dcdc2a	419.709	-3.56118	0.661138	-5.38644	7.18684e-08	1.10693e-05
Crym	353.888	-3.615	0.907111	-3.98518	6.74293e-05	0.00302926
Emilin3	597.048	-3.74024	0.781349	-4.7869	1.69375e-06	0.000157831
Chrm2	179.624	-3.74212	0.801036	-4.67161	2.98853e-06	0.000248651
Enpp6	67.1873	-3.86896	1.00099	-3.86512	0.000111033	0.00454771
Crispld1	746.909	-3.91684	0.482639	-8.11547	4.839e-16	4.08104e-13
Nxph3	147.341	-3.94275	0.42669	-9.24032	2.45766e-20	5.06661e-17
Gm12873	42.5103	-4.06593	0.601231	-6.76269	1.35457e-11	5.58506e-09
Dync1i1	118.718	-4.06654	0.906919	-4.4839	7.32905e-06	0.00051902
Fam90a1a	168.492	-4.08455	0.821367	-4.97287	6.59701e-07	7.28577e-05
Klrb1a	88.4821	-4.13674	0.735136	-5.62717	1.83185e-08	3.50394e-06
Itih2	1832.46	-4.15023	0.683432	-6.07263	1.25836e-09	3.38371e-07
Cd79b	154.113	-4.21722	0.656676	-6.42208	1.34429e-10	5.0902e-08
Kcng1	168.687	-4.24602	0.703562	-6.03503	1.5893e-09	3.98484e-07
Cyp3a57	383.869	-4.24609	0.888688	-4.77793	1.77107e-06	0.000162676
Agtr2	153.961	-4.25784	1.06023	-4.01597	5.92017e-05	0.0027714
Kcnd3	85.5598	-4.27649	0.684735	-6.24546	4.22554e-10	1.32883e-07
Nptx2	283.699	-4.3414	0.5721	-7.58855	3.23516e-14	1.87579e-11
Il19	96.0575	-4.43957	0.936966	-4.73824	2.1558e-06	0.000188673
Dppa2	99.0507	-4.50607	0.737106	-6.11319	9.76604e-10	2.83123e-07
Tslp	394.601	-4.57427	0.935679	-4.88872	1.01494e-06	0.000102903
Dlx2	258.26	-4.90886	0.836557	-5.86793	4.41279e-09	9.52033e-07
Efcab6	59.4262	-5.13776	0.865236	-5.93799	2.88544e-09	6.57596e-07
Fgf3	28.8949	-5.25167	1.40081	-3.74903	0.000177522	0.00662724
Dlx1	189.596	-5.36695	0.743965	-7.21398	5.4341e-13	2.80068e-10
Nrgn	122.72	-5.39178	0.845575	-6.37647	1.81215e-10	6.43183e-08
Pyy	169.307	-5.82744	1.57674	-3.69588	0.000219126	0.00771473
Gm30191	31.6147	-5.96175	1.138	-5.23881	1.61615e-07	2.1729e-05
5430419D17Rik	285.636	-6.89639	0.813698	-8.47537	2.34342e-17	2.41555e-14
Defb50	11.4852	-6.92601	2.04909	-3.38004	0.00072475	0.0189128
Tpsab1	53.134	-7.04424	2.16161	-3.2588	0.00111885	0.0254402

## Sheet: DEGs (sgCsnk1a1 vs sgSHL)
gene	baseMean	log2FoldChange	lfcSE	stat	pvalue	padj
Rpl10-ps1	1923.68	27.886	3.38339	8.24203	1.69312e-16	5.52441e-14
1700047I17Rik2	359.062	25.3108	3.38348	7.48069	7.3933e-14	1.56358e-11
Gm28635	100.214	23.3809	3.38376	6.90974	4.85533e-12	6.87726e-10
Krt35	585.438	12.0255	1.14067	10.5425	5.50261e-26	8.37864e-23
Gm49425	253.663	11.4605	1.07731	10.638	1.9832e-26	3.43181e-23
Golga7b	614.425	11.2857	1.06127	10.6342	2.066e-26	3.43181e-23
Krt33a	174.18	10.9177	1.12338	9.71864	2.51123e-22	1.91188e-19
Spink12	167.856	10.8648	1.81854	5.97444	2.3088e-09	1.87495e-07
Krt73	6112.92	10.5795	0.711433	14.8707	5.10716e-50	3.1106e-46
Krt81	125.981	10.4478	1.08994	9.58566	9.18664e-22	6.21698e-19
Mt4	90.0774	9.96679	1.07609	9.26201	2.00617e-20	1.14552e-17
AC124513.1	59.8676	9.3775	3.38404	2.7711	0.00558674	0.0478355
Gm3788	53.4964	9.21646	3.04509	3.02666	0.00247271	0.0266388
Krt2	51.4424	9.15727	1.39195	6.57872	4.74526e-11	5.55804e-09
Krt86	49.5782	9.10546	1.15186	7.90501	2.67909e-15	7.30631e-13
Sp5	79.9054	9.05753	1.23732	7.32027	2.4748e-13	4.59816e-11
Gprc5d	43.4199	8.91072	1.12379	7.92918	2.20601e-15	6.10731e-13
Krtap7-1	38.4521	8.73708	1.28414	6.80383	1.01873e-11	1.35871e-09
Cadps	72.3514	8.3886	1.11956	7.49274	6.74508e-14	1.48489e-11
Gm18787	28.408	8.30326	1.36808	6.06929	1.28477e-09	1.11258e-07
Krtap8-1	26.4675	8.19583	1.24481	6.58402	4.57887e-11	5.39775e-09
Gm5512	24.4758	8.08705	2.73464	2.95726	0.00310386	0.0314378
Gm13772	23.7943	8.04714	2.8372	2.8363	0.00456397	0.0414066
Shh	613.887	8.01528	0.626684	12.79	1.86477e-37	5.67884e-34
Gm2423	143.01	7.99058	2.81545	2.83812	0.00453807	0.0413358
Mmp7	34.9685	7.84705	1.36636	5.74304	9.29943e-09	6.65087e-07
Krt36	111.458	7.81194	0.814665	9.58914	8.8823e-22	6.21698e-19
Krt27	32.0962	7.73213	1.21508	6.36346	1.97261e-10	2.03635e-08
Klk14	506.073	7.50946	0.475729	15.7852	3.93521e-56	3.59521e-52
S100g	96.126	7.49721	0.89813	8.34758	6.96776e-17	2.40217e-14
Krtap13-1	15.3479	7.40795	1.37702	5.37968	7.46182e-08	4.2607e-06
Otop2	73.6393	7.21858	0.790717	9.12916	6.90304e-20	3.82219e-17
Krt90	253.545	6.71964	0.851573	7.89085	3.00125e-15	8.06454e-13
Spink6	7.76091	6.42495	1.55154	4.14101	3.45786e-05	0.000894931
Serpinb2	380.608	6.41961	0.851404	7.54003	4.69849e-14	1.07313e-11
Rdh16f1	53.9619	6.40888	1.0246	6.25499	3.97532e-10	3.72498e-08
Cnfn	276.165	6.33952	0.63446	9.99199	1.65224e-23	1.50949e-20
Igkv3-2	11.8608	6.24449	1.9765	3.15937	0.00158109	0.0191831
Cryba4	184.981	6.1021	0.681673	8.95166	3.50189e-19	1.88196e-16
Wnt10b	508.731	6.07141	0.369266	16.4418	9.59666e-61	1.7535e-56
Sptssb	173.228	6.05522	0.637127	9.50395	2.02075e-21	1.23077e-18
Krt28	338.557	6.02688	0.79991	7.53445	4.90411e-14	1.10627e-11
Krt31	214.452	5.92944	0.569032	10.4202	2.00494e-25	2.44228e-22
Shisal1	107.732	5.82825	0.667208	8.73528	2.43043e-18	1.03276e-15
Klk11	271.898	5.75078	0.600734	9.57292	1.03925e-21	6.78187e-19
Ptch2	3120.58	5.57703	0.517432	10.7783	4.35941e-27	9.9569e-24
Fcrlb	23.621	5.52535	1.09958	5.02497	5.035e-07	2.29999e-05
Krt25	100.528	5.44449	0.634845	8.57609	9.81568e-18	3.816e-15
Tmem178	210.669	5.38295	0.772632	6.96703	3.23707e-12	4.69427e-10
Otop3	185.92	5.32651	0.607724	8.76469	1.8729e-18	8.34675e-16
4930438A08Rik	44.8231	5.28172	0.786335	6.71688	1.85656e-11	2.38895e-09
Abhd12b	89.8271	5.28048	0.727753	7.25588	3.99068e-13	6.94454e-11
Ascl4	49.6698	5.26945	0.720065	7.31802	2.51651e-13	4.59816e-11
Trdj1	22.2542	5.25198	1.73475	3.02751	0.00246579	0.0265953
Notum	1468.05	5.15797	0.388223	13.2861	2.78735e-40	1.27326e-36
Krt75	168.92	5.14461	1.03829	4.9549	7.23683e-07	3.1863e-05
Tchh	6237.33	5.14195	0.615225	8.35784	6.38777e-17	2.24456e-14
Il1f5	91.1044	5.07433	0.939524	5.40096	6.62841e-08	3.85714e-06
Dkk4	32.0118	4.95738	0.82178	6.03248	1.61459e-09	1.37218e-07
Serpinb10	589.324	4.9465	0.655572	7.54531	4.51201e-14	1.04359e-11
Ildr2	283.364	4.90581	0.573054	8.56083	1.12056e-17	4.2656e-15
Sp6	780.132	4.90213	0.678917	7.22052	5.17898e-13	8.68169e-11
Sfrp5	34.4203	4.88453	0.832665	5.86614	4.46066e-09	3.42459e-07
Il1f6	24.2107	4.88163	1.22444	3.98684	6.69591e-05	0.00155263
Gm17241	4.80697	4.86822	1.61546	3.01352	0.00258235	0.0274356
Gm20689	4.99999	4.82965	1.48841	3.24482	0.00117523	0.0151865
Krt84	67.8848	4.81024	0.624845	7.6983	1.37891e-14	3.45144e-12
Clec4e	250.877	4.80652	1.03875	4.62723	3.70583e-06	0.000134618
Dsg4	113.312	4.80077	0.81587	5.88423	3.99902e-09	3.13606e-07
Trdc	190.45	4.73048	0.64482	7.33613	2.19866e-13	4.14165e-11
Tgm3	121.421	4.69349	0.602424	7.791	6.64828e-15	1.71095e-12
Gli1	1394.61	4.63754	0.612916	7.56636	3.8384e-14	9.02281e-12
C1qtnf3	356.266	4.63023	0.923923	5.01149	5.40094e-07	2.44878e-05
Wif1	12112.3	4.62909	0.472662	9.79366	1.19875e-22	9.95614e-20
Kremen2	171.231	4.62863	0.558277	8.29092	1.12372e-16	3.80233e-14
Wnt16	107.191	4.60308	0.470757	9.77803	1.39907e-22	1.11147e-19
S100a9	2291.13	4.55855	0.957049	4.76314	1.90605e-06	7.60422e-05
Vit	99.2858	4.54892	0.933542	4.87275	1.10053e-06	4.66565e-05
Sdr9c7	63.836	4.53852	0.935257	4.8527	1.21795e-06	5.0809e-05
Ntf3	42.4415	4.5232	0.817769	5.53115	3.18145e-08	2.00069e-06
Tubb3	1025.13	4.51389	0.470792	9.58787	8.99227e-22	6.21698e-19
Fstl4	100.712	4.49587	0.625028	7.19307	6.33512e-13	1.05232e-10
Il1b	2984.69	4.48202	0.933271	4.80249	1.56709e-06	6.36306e-05
Gm6392	26.3191	4.48082	1.21258	3.69527	0.000219652	0.00408288
Bmp2	722.692	4.46268	0.343284	13	1.22395e-38	4.4728e-35
Prr9	1070.65	4.45718	0.985449	4.523	6.09705e-06	0.000206306
Nxpe5	364.716	4.37524	1.05375	4.15205	3.29512e-05	0.000863822
S100a3	368.65	4.34134	0.485412	8.94362	3.76631e-19	1.96623e-16
Ccr4	53.718	4.33489	0.68202	6.35595	2.07137e-10	2.11752e-08
Tspear	135.9	4.31228	0.76256	5.65501	1.5584e-08	1.04304e-06
Gm5416	8.72722	4.29648	1.11429	3.8558	0.00011535	0.00240876
Sfrp4	107.296	4.26043	0.790302	5.39088	7.01131e-08	4.04134e-06
Psors1c2	26.9525	4.1914	0.762891	5.49411	3.92696e-08	2.39978e-06
Gpr55	74.3686	4.16441	0.822776	5.06142	4.16149e-07	1.92503e-05
Rpsa-ps10	666.497	4.13846	0.99566	4.15649	3.23167e-05	0.00085208
Tpt1-ps5	12.1591	4.13166	1.24445	3.32006	0.000899976	0.0125601
S100a8	1096.17	4.10392	0.676574	6.06573	1.31353e-09	1.13211e-07
Klk8	1258.57	4.09837	0.612483	6.6914	2.21043e-11	2.76637e-09
AC122119.2	60.9223	4.07708	1.04402	3.90517	9.41595e-05	0.00205064
Tnn	695.533	4.07432	1.25507	3.24628	0.00116922	0.0151216
Sprr1b	1082.2	4.05326	0.673972	6.01399	1.8101e-09	1.52416e-07
Foxf2	52.9741	4.04581	0.647597	6.24742	4.17291e-10	3.87042e-08
Klk13	422.925	4.02194	0.673445	5.97219	2.34085e-09	1.89257e-07
Gm18283	34.6381	4.01984	0.977311	4.11316	3.90277e-05	0.000989062
Casp14	61.0596	3.99451	1.00531	3.97343	7.08454e-05	0.00162217
Osm	790.986	3.98197	1.01998	3.90396	9.46296e-05	0.00205597
Vnn1	147.669	3.94701	0.837783	4.71125	2.46204e-06	9.52499e-05
Tnfsf14	70.1783	3.94509	1.11649	3.53347	0.000410143	0.00676976
Crct1	32.1435	3.94131	0.993198	3.9683	7.23859e-05	0.00165123
Wfdc21	37.2869	3.93586	0.943082	4.1734	3.00087e-05	0.000800466
Gpr132	207.986	3.91968	0.838744	4.67327	2.96441e-06	0.000111682
Il23a	411.195	3.91545	0.587943	6.65957	2.74629e-11	3.39056e-09
Galnt14	372.476	3.91304	0.781277	5.00852	5.48507e-07	2.48077e-05
Krt79	42915.9	3.89497	0.37655	10.3438	4.46364e-25	5.09748e-22
Hoxb9	47.1568	3.8884	0.930187	4.18023	2.91211e-05	0.000781352
Foxi3	110.131	3.87761	0.860288	4.50734	6.56448e-06	0.000220489
Lyve1	198.858	3.85909	1.07181	3.60054	0.000317556	0.00552083
Ak5	57.8955	3.85714	0.914659	4.21702	2.47547e-05	0.000684293
Wfdc17	256.447	3.85105	0.946026	4.07077	4.68588e-05	0.00115391
Lyz1	114.218	3.84306	1.11281	3.45347	0.000553415	0.00856224
Gm13981	22.7461	3.84116	1.0105	3.80126	0.000143961	0.00289061
Lgi2	615.565	3.83376	0.543684	7.05145	1.77068e-12	2.74185e-10
Axin2	1794.19	3.81291	0.381014	10.0073	1.41603e-23	1.36177e-20
Slco4a1	258.711	3.78736	0.361426	10.4789	1.07959e-25	1.40903e-22
Slurp2	21.0952	3.76517	0.827834	4.54822	5.41021e-06	0.000186286
Nlrp3	566.721	3.75902	0.962726	3.90456	9.43958e-05	0.00205333
Ptch1	4930.84	3.74388	0.402545	9.30052	1.3976e-20	8.2377e-18
Klrg2	613.607	3.72279	0.354319	10.5069	8.02895e-26	1.1285e-22
Ifitm6	50.4775	3.71813	1.20398	3.08821	0.00201366	0.0229816
Fut2	128.566	3.69011	0.546242	6.75546	1.42386e-11	1.87171e-09
Apoo-ps	50.1932	3.68042	1.00333	3.66821	0.000244251	0.0044585
Egr4	272.552	3.67578	0.599965	6.12666	8.97438e-10	8.07783e-08
Krt1	4694.82	3.67059	1.30566	2.81129	0.00493439	0.0437888
Gm6136	62.1981	3.66338	0.875765	4.18306	2.87609e-05	0.00077396
S100a7a	139.364	3.64508	0.475298	7.66903	1.73298e-14	4.222e-12
Parvg	653.184	3.6074	0.687502	5.24712	1.54498e-07	7.90752e-06
Cd69	209.124	3.58829	0.83253	4.3101	1.63181e-05	0.000479275
Clec4n	570.165	3.58753	0.904539	3.96614	7.3047e-05	0.00166423
Dynap	106.359	3.58721	0.7043	5.09329	3.51897e-07	1.64447e-05
Sirpb1c	116.812	3.54413	0.91173	3.88726	0.000101381	0.00215685
Gm12222	19.3246	3.53539	1.15509	3.06072	0.00220807	0.0245563
Gpnmb	420.639	3.53396	0.564965	6.25519	3.97039e-10	3.72498e-08
Gm10240	6.67962	3.52354	1.19309	2.95329	0.00314403	0.0317391
Gm13370	6.67962	3.52354	1.19309	2.95329	0.00314403	0.0317391
Cldn11	43.2228	3.52093	1.04126	3.38142	0.000721132	0.0104742
Fosl1	356.908	3.5181	0.664634	5.2933	1.20131e-07	6.456e-06
Tdh	47.1731	3.51318	1.08978	3.22375	0.00126524	0.0160294
Klk5	27.3818	3.49119	1.02287	3.41313	0.000642217	0.00967402
Endou	433.789	3.47744	0.44646	7.78892	6.75851e-15	1.71516e-12
Stfa1	148.254	3.47666	0.867469	4.00783	6.12805e-05	0.00144293
Fpr2	36.0318	3.4662	0.967661	3.58204	0.000340921	0.00581635
Plek	1975.93	3.46467	1.21286	2.85662	0.0042818	0.0397606
Ptprz1	1496.18	3.44201	0.460175	7.47978	7.44481e-14	1.56358e-11
Cd80	130.761	3.43349	0.436428	7.86725	3.6252e-15	9.59996e-13
Gm5483	16.5659	3.42855	1.11984	3.06165	0.00220123	0.0244951
Sdr16c6	38.7727	3.39551	0.760841	4.46284	8.08823e-06	0.000263907
Defb6	169.93	3.38931	0.948665	3.57271	0.000353301	0.00598841
Ngp	28.6009	3.38041	0.779878	4.33453	1.4607e-05	0.000436109
Klk6	362.71	3.37893	0.335274	10.0781	6.9021e-24	7.0064e-21
Uox	128.332	3.35939	0.494418	6.79464	1.08584e-11	1.43772e-09
Gm6551	118.052	3.347	0.745826	4.48764	7.20166e-06	0.000238818
Npr3	79.664	3.33558	0.583811	5.71346	1.10701e-08	7.74992e-07
Pira2	93.8946	3.32835	0.975818	3.41083	0.000647657	0.00973026
Ccn3	158.826	3.32275	0.737836	4.50336	6.68861e-06	0.000223836
Pcolce2	140.912	3.31093	1.06016	3.12304	0.00178996	0.0210109
Akr1c18	142.967	3.30616	0.650729	5.0807	3.76042e-07	1.75282e-05
Cemip	609.298	3.29581	0.378221	8.71397	2.93403e-18	1.21842e-15
Fst	5149.53	3.29449	0.520097	6.33438	2.38292e-10	2.36635e-08
Srgn	1391.47	3.29275	0.96935	3.39686	0.000681628	0.0100574
Psca	55.2709	3.29058	1.09335	3.00963	0.00261562	0.0276258
Trem1	101.139	3.28691	0.948117	3.46677	0.000526745	0.00825294
2310007B03Rik	314.877	3.28679	0.576915	5.69717	1.2181e-08	8.46279e-07
Dusp2	565.491	3.28514	0.672396	4.88573	1.03046e-06	4.37875e-05
Gimap8	174.029	3.28132	0.447149	7.33831	2.16302e-13	4.11695e-11
Pirb	1229.21	3.27242	0.945247	3.46198	0.000536219	0.00836703
Gm6557	30.0638	3.26078	0.920005	3.5443	0.000393651	0.00655679
Rbp2	296.236	3.26005	0.698157	4.66951	3.01919e-06	0.000113512
Ccr1	596.844	3.25998	0.976078	3.33988	0.000838141	0.011905
Pnpla1	374.363	3.25145	0.474116	6.85793	6.98638e-12	9.59814e-10
Flrt1	101.467	3.24023	0.72881	4.44592	8.75171e-06	0.000281703
Bmp4	200.183	3.23679	0.489958	6.60626	3.94156e-11	4.73007e-09
Clec4d	130.976	3.23187	0.978987	3.30123	0.000962605	0.0132445
Kcna3	37.1665	3.21606	1.07413	2.99411	0.00275243	0.028673
Fzd10	744.938	3.20177	0.482687	6.63321	3.28453e-11	4.001e-09
Capns2	259.038	3.1968	0.71065	4.49842	6.84619e-06	0.00022869
Tmem269	30.4866	3.19471	0.543289	5.88032	4.09471e-09	3.19737e-07
Rps2-ps6	38.0079	3.18163	0.983271	3.23576	0.0012132	0.0155672
Xkrx	94.0342	3.18153	0.501487	6.34419	2.236e-10	2.24484e-08
Tmem132e	126.432	3.17202	0.477947	6.63677	3.20638e-11	3.93201e-09
Cd300ld	412.887	3.15738	1.04281	3.02777	0.00246367	0.0265896
Lemd1	80.4705	3.15542	0.801074	3.93899	8.18247e-05	0.00183448
Defb14	42.5073	3.15534	1.09634	2.87807	0.00400112	0.0379535
Cyp21a1	22.0483	3.14296	0.875061	3.59171	0.00032852	0.00567015
Hoxc13	57.7573	3.13846	0.804326	3.90198	9.54086e-05	0.00206617
Rrad	283.109	3.13041	0.595073	5.26055	1.43622e-07	7.43752e-06
Tnfrsf11b	1580.74	3.12813	0.494837	6.32154	2.58971e-10	2.53044e-08
Itgam	1829.15	3.1106	0.935451	3.32524	0.000883423	0.0123978
Muc13	115.044	3.0925	0.6735	4.59168	4.3969e-06	0.0001545
Il1a	217.274	3.091	0.621838	4.97074	6.66965e-07	2.9508e-05
Cd226	24.4602	3.0784	0.917451	3.35539	0.000792541	0.0113803
Pmaip1	947.732	3.07758	0.567881	5.41941	5.97972e-08	3.51557e-06
Bst1	331.282	3.07254	0.645375	4.76085	1.92777e-06	7.65744e-05
Teddm3	526.898	3.07048	1.01985	3.01072	0.00260631	0.0275752
Krt87	239.935	3.05743	0.349838	8.73954	2.34059e-18	1.01827e-15
Apoc2	94.6229	3.05553	1.07576	2.84033	0.00450664	0.0411521
Apol8	126.24	3.05073	0.396439	7.69534	1.41119e-14	3.4845e-12
Gpr141	65.5137	3.03766	1.01279	2.99931	0.00270594	0.0283911
Trp73	947.68	3.02921	0.430663	7.03382	2.00948e-12	3.05977e-10
Tagln3	40.6058	3.01161	0.583525	5.16106	2.45559e-07	1.20614e-05
Dct	112.684	2.99465	0.952408	3.1443	0.00166486	0.0199591
Cd53	846.217	2.99246	1.00666	2.97265	0.00295237	0.0301879
Asprv1	3095.44	2.97904	0.681668	4.37022	1.2412e-05	0.000380525
Vsnl1	317.392	2.97315	0.441966	6.72709	1.73085e-11	2.24298e-09
Masp1	610.74	2.96474	0.463038	6.40281	1.52542e-10	1.64926e-08
Rasgef1b	1209.4	2.94594	0.573084	5.14051	2.73999e-07	1.32352e-05
Stra6	7484.97	2.94571	0.351266	8.38599	5.03025e-17	1.80221e-14
Ms4a6d	787.891	2.93539	0.964207	3.04436	0.00233178	0.025467
Sncaip	408.512	2.93022	0.428364	6.8405	7.89164e-12	1.07609e-09
Mmp9	895.713	2.92964	0.747676	3.91833	8.91643e-05	0.00196527
Slc6a2	190.387	2.92813	0.657779	4.45155	8.52541e-06	0.00027571
Cd300lf	352.156	2.92194	0.843558	3.46383	0.000532551	0.00831689
Calm4	3852.36	2.92152	0.90334	3.23414	0.00122011	0.0156338
Prss33	28.4413	2.91817	0.611365	4.77321	1.81312e-06	7.32949e-05
Csf2rb2	302.137	2.90269	0.806302	3.60001	0.000318207	0.00552688
Slc38a4	735.533	2.90139	0.48396	5.99509	2.03369e-09	1.67385e-07
Ms4a4a	326.489	2.89894	0.99985	2.89937	0.00373913	0.0361977
Lilr4b	1319.98	2.89313	0.912054	3.1721	0.00151341	0.0184723
Scel	296.875	2.89194	0.529088	5.46589	4.60582e-08	2.76834e-06
Gsg1l	245.947	2.89059	0.591375	4.8879	1.01915e-06	4.34078e-05
Slurp1	25.6393	2.88225	0.973089	2.96196	0.00305691	0.0310655
Gjb5	194.227	2.86725	0.446447	6.42237	1.3417e-10	1.468e-08
Krt14	119767	2.85746	0.394072	7.25112	4.13348e-13	7.12518e-11
Acer1	66.9212	2.85047	0.685268	4.15965	3.18738e-05	0.000844054
Itga11	497.747	2.84309	0.53188	5.34536	9.02371e-08	5.01159e-06
Cd300c2	1231.35	2.83453	0.991308	2.85939	0.00424462	0.0395501
Clec7a	718.55	2.83174	0.926141	3.05756	0.00223145	0.024711
Dlx3	580.134	2.829	0.560256	5.04949	4.42996e-07	2.04405e-05
Ccr2	1534.6	2.82431	1.0108	2.79415	0.00520367	0.0456148
Csf2rb	784.002	2.82137	0.757311	3.72551	0.000194921	0.00370999
Ccl3	805.558	2.80641	0.92501	3.03392	0.00241395	0.0262078
Gm14335	13.2871	2.80452	0.828406	3.38545	0.000710622	0.0103723
Popdc3	72.1315	2.80443	0.645288	4.34601	1.38636e-05	0.000418703
Adgrg5	75.12	2.80281	0.857869	3.26717	0.00108628	0.0144353
Aqp1	399.218	2.80166	0.566913	4.94196	7.73418e-07	3.369e-05
Scimp	117.031	2.79352	0.932278	2.99644	0.00273149	0.0285525
Slc15a3	896.866	2.79186	0.603284	4.62777	3.69627e-06	0.000134538
Fabp4	230.094	2.78694	0.65184	4.2755	1.90709e-05	0.000551366
Klk10	690.813	2.78552	0.675199	4.12548	3.69955e-05	0.000946752
Gpr171	64.1128	2.78409	0.952344	2.92341	0.00346219	0.0341081
Ncf4	549.146	2.77657	0.933618	2.97399	0.00293958	0.0300907
Gm12254	11.797	2.76759	0.967007	2.86201	0.00420961	0.0393242
Shank1	404.634	2.74702	0.422717	6.49849	8.11313e-11	9.15081e-09
Wnt10a	1032.59	2.73569	0.287534	9.51433	1.82886e-21	1.15231e-18
Clec5a	184.907	2.73481	0.981142	2.78737	0.00531379	0.0462217
Tenm2	1014.58	2.73222	0.470546	5.80649	6.37975e-09	4.71947e-07
Samsn1	141.424	2.73152	0.948751	2.87907	0.00398846	0.0378582
Gm1966	155.018	2.72731	0.855639	3.18746	0.00143529	0.0178406
Tyrobp	2002.37	2.72047	0.97602	2.78731	0.00531478	0.0462217
Krt6b	6313.57	2.69803	0.782848	3.44643	0.000568043	0.00873676
Bdkrb2	194.799	2.69439	0.524623	5.13586	2.8085e-07	1.35044e-05
Selp	80.6937	2.69293	0.730051	3.68868	0.000225419	0.00416467
Il1f9	191.266	2.6843	0.424375	6.3253	2.52736e-10	2.48279e-08
Csn1s1	1383.56	2.67795	0.699291	3.82953	0.00012839	0.00262704
Adrb2	499.776	2.67123	0.365002	7.3184	2.50949e-13	4.59816e-11
Krt5	106244	2.66396	0.322819	8.25218	1.55536e-16	5.16718e-14
Lair1	618.18	2.66254	0.955111	2.78767	0.00530881	0.0462217
Gm7600	21.5011	2.66035	0.926295	2.87203	0.00407847	0.0384494
Alox5ap	688.925	2.65216	0.722196	3.67235	0.000240327	0.00440005
Fam81a	109.322	2.64676	0.571577	4.63062	3.64575e-06	0.00013323
Slc16a13	464.494	2.64473	0.305842	8.64738	5.26934e-18	2.09307e-15
Fndc1	920.505	2.63112	0.614209	4.28375	1.83769e-05	0.000532144
Chil3	117.663	2.61869	0.862375	3.0366	0.00239263	0.0260382
Hsd17b2	20.6942	2.61492	0.86976	3.00649	0.00264283	0.027881
Mmp12	638.897	2.61384	0.767	3.40787	0.000654716	0.00979265
Runx3	909.104	2.6122	0.326556	7.99923	1.25198e-15	3.68971e-13
Msr1	541.209	2.61158	0.937841	2.78468	0.00535809	0.0464153
Gngt2	347.309	2.61105	0.8774	2.9759	0.00292132	0.0299878
Car14	20.5379	2.61046	0.839365	3.11005	0.00187058	0.0216459
Stfa3	365.157	2.60878	0.807817	3.22942	0.00124042	0.0158164
Pla2g4f	287.658	2.60179	0.565363	4.60197	4.18507e-06	0.00014791
Saa3	1563.56	2.60177	0.797967	3.2605	0.00111215	0.0146196
Cyp26a1	789.249	2.5993	0.395905	6.56546	5.18711e-11	5.99866e-09
Krt83	128.667	2.59091	0.610988	4.24052	2.22999e-05	0.000630748
Cd5	92.1781	2.58761	0.510993	5.06389	4.10786e-07	1.90505e-05
Tent5c	558.863	2.58233	0.744372	3.46914	0.000522132	0.00822449
Krtdap	4862.85	2.57881	0.806982	3.19562	0.00139529	0.0173789
I830077J02Rik	115.608	2.57858	0.795144	3.24291	0.00118316	0.0152459
Rtn4r	51.5883	2.57194	0.739869	3.47621	0.00050855	0.0080802
Itgb2	1508.77	2.56711	0.84621	3.03366	0.00241608	0.0262153
Ptprc	2073.06	2.55956	0.916667	2.79225	0.00523432	0.0457494
H2-Aa	17176.8	2.55722	0.914719	2.79563	0.00517986	0.045499
Sncg	25.4774	2.55564	0.544561	4.69303	2.69193e-06	0.000102901
Lgr5	598.2	2.54203	0.586051	4.33756	1.44073e-05	0.000431556
Gja5	69.1149	2.54136	0.623121	4.07844	4.53399e-05	0.00111953
Hopx	888.204	2.53352	0.473367	5.35212	8.69279e-08	4.87223e-06
AB124611	272.048	2.52648	0.857762	2.94543	0.00322503	0.0323246
Wnt6	413.747	2.52002	0.730144	3.4514	0.000557676	0.00861358
Ccdc88b	509.394	2.51501	0.638713	3.93762	8.22939e-05	0.00184274
AC127331.2	125.627	2.51316	0.796718	3.15439	0.00160835	0.0194364
Id1	2714.23	2.51225	0.508377	4.94171	7.74397e-07	3.369e-05
Fxyd4	301.081	2.48728	0.657117	3.78514	0.00015362	0.00305768
Il1rn	1625.95	2.4748	0.62187	3.97961	6.90283e-05	0.00159052
Lrrk2	484.3	2.47471	0.427083	5.79445	6.85446e-09	5.00978e-07
Cd244a	70.4906	2.46452	0.817951	3.01304	0.00258645	0.0274449
Ccdc33	58.7354	2.45652	0.864322	2.84213	0.0044813	0.0410439
Stac	143.731	2.45545	0.815352	3.01152	0.00259944	0.0275185
Mfng	75.1448	2.45066	0.669411	3.66093	0.000251304	0.00454187
Rpl17-ps5	65.5194	2.44889	0.7251	3.37732	0.000731953	0.0106229
Cyfip2	205.54	2.44867	0.429934	5.69544	1.23055e-08	8.51693e-07
Trbc2	301.563	2.44736	0.416295	5.87891	4.12971e-09	3.19738e-07
Csf3r	484.913	2.44194	0.801953	3.045	0.00232684	0.0254434
Neurl3	630.556	2.44149	0.806079	3.02884	0.00245491	0.0265421
Lgr6	5484.25	2.44097	0.419047	5.82506	5.70912e-09	4.24053e-07
Pou2f3	164.108	2.43538	0.333079	7.31172	2.63737e-13	4.77128e-11
Il10ra	748.586	2.43518	0.880101	2.76693	0.00565876	0.0483235
Bnc1	566.074	2.43361	0.430205	5.65687	1.54154e-08	1.03938e-06
Atp2b4	2069.97	2.43269	0.286058	8.50417	1.82896e-17	6.68374e-15
Mefv	162.093	2.43243	0.799183	3.04365	0.00233727	0.0254965
Rpl19-ps3	95.185	2.42532	0.433932	5.58917	2.28152e-08	1.48356e-06
Rbm3-ps	45.326	2.41716	0.769355	3.1418	0.00167912	0.0200791
Chl1	1037.08	2.41673	0.516098	4.6827	2.83124e-06	0.000107776
Cybb	1905.72	2.41538	0.856028	2.82161	0.00477828	0.0428615
Loxl4	439.062	2.41489	0.270893	8.91457	4.89717e-19	2.41841e-16
Ceacam19	247.104	2.41273	0.301833	7.99359	1.31067e-15	3.80137e-13
Defb1	463.707	2.40946	0.403937	5.96493	2.44738e-09	1.96998e-07
Ret	113.502	2.40311	0.446498	5.38212	7.36119e-08	4.21642e-06
Trex2	21.3562	2.40122	0.629042	3.81726	0.000134942	0.00274266
Coro1a	1518.63	2.38546	0.842231	2.83231	0.00462136	0.0418441
Ccrl2	1028.11	2.38309	0.842164	2.82972	0.00465891	0.0420793
Nfkbid	490.941	2.38266	0.786605	3.02905	0.00245324	0.0265398
A630023A22Rik	18.2968	2.38021	0.74816	3.18141	0.00146559	0.0180819
Slc23a4	63.3381	2.37298	0.525374	4.51674	6.27985e-06	0.000212099
Gsdma	253.711	2.3661	0.585266	4.04278	5.28216e-05	0.00127497
Relt	247.805	2.36311	0.759044	3.11327	0.00185025	0.0214706
Cers3	390.64	2.35487	0.70932	3.3199	0.000900491	0.0125601
Il2rg	776.006	2.33985	0.441093	5.30467	1.12875e-07	6.13823e-06
Fxyd5	1372.94	2.33391	0.732463	3.18639	0.00144062	0.0178946
Syk	1221.52	2.3293	0.602387	3.86679	0.000110279	0.00232146
Gm14137	346.317	2.32643	0.454761	5.11573	3.12525e-07	1.47939e-05
Pla2g4e	313.489	2.32546	0.744811	3.12221	0.00179499	0.0210109
Lmo2	304.064	2.32389	0.779562	2.98102	0.00287292	0.0296074
Ephx3	317.444	2.32092	0.532528	4.3583	1.31079e-05	0.000400515
Klk7	273.229	2.31204	0.501018	4.61468	3.93702e-06	0.000140228
Pltp	4024.51	2.31197	0.60016	3.85225	0.000117039	0.00243293
Cwh43	1162.55	2.30397	0.471087	4.89075	1.00454e-06	4.28855e-05
Syt9	137.583	2.30274	0.598506	3.84748	0.00011934	0.00246951
Pirt	77.983	2.30145	0.784125	2.93506	0.00333487	0.0330922
Pik3r5	304.816	2.29932	0.812114	2.83128	0.00463617	0.0419367
Serpinb8	804.415	2.28892	0.449334	5.09404	3.50518e-07	1.64222e-05
Gm49369	571.293	2.28376	0.614858	3.71429	0.000203773	0.00384642
Klhdc8a	179.073	2.28297	0.585523	3.89902	9.65814e-05	0.00207616
Fgr	411.067	2.28287	0.731034	3.1228	0.00179137	0.0210109
Moxd1	9901.65	2.28256	0.36264	6.29428	3.08828e-10	2.96995e-08
Nccrp1	217.425	2.27955	0.812463	2.80573	0.00502031	0.0443574
Adgrl4	66.3162	2.27687	0.769418	2.95921	0.00308427	0.031274
Lilrb4a	902.153	2.25645	0.793936	2.84211	0.00448161	0.0410439
Diras2	158.251	2.2555	0.356862	6.32036	2.60946e-10	2.53394e-08
Grasp	694.471	2.2456	0.402159	5.58386	2.35235e-08	1.52419e-06
Cpa6	64.4062	2.24472	0.525796	4.26919	1.96186e-05	0.000562749
Gprc5a	596.641	2.2376	0.447763	4.9973	5.81399e-07	2.61015e-05
Acod1	125.688	2.23129	0.622033	3.58708	0.000334395	0.00572674
Galnt6	1050.87	2.21667	0.580198	3.82054	0.00013316	0.00271248
Gm15501	257.913	2.20346	0.643278	3.42536	0.000613992	0.00935685
Cd36	158.433	2.19878	0.779494	2.82077	0.00479078	0.0429525
Vsig10l	183.599	2.19783	0.426613	5.15181	2.57986e-07	1.2604e-05
Lmo1	1255	2.18956	0.270603	8.09139	5.89859e-16	1.79632e-13
Mkx	73.5461	2.18673	0.683543	3.1991	0.00137856	0.0172174
Ctsc	8959.63	2.18431	0.521684	4.18703	2.82625e-05	0.000762795
Fut1	89.5017	2.1819	0.630466	3.46078	0.000538623	0.00839021
Apcdd1	3698.7	2.1756	0.603158	3.60702	0.000309735	0.00541577
Pla2g2f	341.271	2.16347	0.506813	4.26877	1.9655e-05	0.00056291
C4b	3135.94	2.16339	0.607444	3.56146	0.000368798	0.00621076
Ackr4	423.143	2.16316	0.633568	3.41425	0.000639577	0.00965016
Pim1	3000.56	2.15533	0.552378	3.90191	9.54381e-05	0.00206617
Acp6	2269.22	2.14516	0.341	6.29078	3.15872e-10	3.00605e-08
Fam180a	120.658	2.1432	0.739145	2.89956	0.00373685	0.0361977
Tspan18	1237.5	2.13196	0.614979	3.46671	0.00052686	0.00825294
1500009C09Rik	63.5717	2.13137	0.757767	2.81269	0.00491284	0.0436188
Vsir	2224.22	2.12167	0.709439	2.99063	0.00278401	0.0289173
Tcf7	1631.25	2.12101	0.372892	5.688	1.28532e-08	8.86243e-07
Arhgap45	806.298	2.11851	0.743376	2.84985	0.00437393	0.0403339
Ltb4r1	185.433	2.11801	0.406453	5.21095	1.87874e-07	9.48297e-06
Tnfaip3	3263.02	2.10193	0.543901	3.86454	0.000111298	0.0023402
Smim3	1709.14	2.08607	0.356884	5.84524	5.05848e-09	3.82899e-07
Cers4	375.839	2.07318	0.47316	4.38156	1.17832e-05	0.00036492
Gm13456	56.181	2.07314	0.596211	3.47719	0.000506707	0.00806494
Kif26a	873.023	2.06492	0.52563	3.92846	8.54907e-05	0.00190266
Dlk2	140.024	2.06386	0.5581	3.69801	0.000217293	0.00405512
Bcam	4243.18	2.0594	0.282556	7.28845	3.13538e-13	5.61664e-11
Itgax	972.609	2.04813	0.709591	2.88635	0.00389744	0.0372069
Ntng2	217.823	2.0315	0.481372	4.22023	2.44053e-05	0.000678744
Tnfsf9	240.736	2.03005	0.615458	3.29844	0.000972252	0.0133571
Cd93	784.723	2.0239	0.65884	3.07192	0.00212688	0.0239031
Bcl11a	800.999	2.02334	0.19918	10.1583	3.04224e-24	3.26987e-21
Prelp	1558.39	2.01564	0.318947	6.31968	2.62103e-10	2.53394e-08
Bdkrb1	18.2588	2.0124	0.712139	2.82586	0.00471539	0.0424641
Sostdc1	2276.57	2.00832	0.513506	3.91099	9.19184e-05	0.00201142
Fgd5	161.901	2.00463	0.698057	2.87173	0.0040823	0.0384494
Slc4a8	47.633	1.99671	0.506072	3.9455	7.96335e-05	0.00178975
Snai3	57.8421	1.99569	0.67932	2.93778	0.00330569	0.0328925
Scube3	683.135	1.99278	0.678886	2.93536	0.00333157	0.0330922
Clic3	139.723	1.99207	0.378365	5.26494	1.40235e-07	7.34203e-06
Cdh5	482.196	1.99075	0.638874	3.11604	0.00183299	0.0213192
Pik3ap1	1361.95	1.98962	0.570108	3.48991	0.000483187	0.00777182
Saa2	261.694	1.98947	0.460562	4.31966	1.56268e-05	0.000461279
Tnfsf13b	40.1411	1.98534	0.602443	3.29548	0.000982544	0.013448
AI464131	737.902	1.98121	0.349449	5.66951	1.43204e-08	9.80008e-07
Cybrd1	627.629	1.97284	0.447275	4.41079	1.02995e-05	0.00032503
Slc25a48	151.863	1.97066	0.488837	4.03132	5.54648e-05	0.00133349
Aqp9	972.398	1.96721	0.522547	3.76465	0.00016678	0.00325578
Hbegf	2318.64	1.96513	0.378016	5.19854	2.00863e-07	9.97331e-06
Slc2a6	70.2665	1.96452	0.611709	3.21152	0.00132033	0.0165922
Pdzk1ip1	742.456	1.96078	0.400304	4.89823	9.67051e-07	4.14788e-05
Tlr2	1220.21	1.95476	0.650666	3.00425	0.0026624	0.0280388
Egr3	2717.48	1.9518	0.472808	4.1281	3.65779e-05	0.000938923
AC147227.1	28.1564	1.93961	0.547702	3.54135	0.000398078	0.00661474
Rps18-ps3	10.5751	1.93816	0.6759	2.86752	0.00413701	0.0388246
Whrn	379.502	1.93661	0.442679	4.37475	1.21574e-05	0.000375237
Ifitm10	285.223	1.93608	0.329769	5.87101	4.3314e-09	3.33938e-07
Ly6g6c	185	1.93236	0.355495	5.43569	5.45863e-08	3.23831e-06
Sema6b	102.08	1.92347	0.631762	3.0446	0.00232989	0.0254615
Saa1	528.928	1.92133	0.499631	3.84551	0.000120302	0.002481
Adm2	117.408	1.91937	0.437349	4.38865	1.14058e-05	0.000354435
Abca12	671.261	1.91472	0.475474	4.02697	5.6501e-05	0.00135042
Chst11	1308.18	1.91227	0.452228	4.22856	2.35191e-05	0.000657928
Gjb2	1995.56	1.91219	0.461423	4.14412	3.41115e-05	0.000886724
Adamts17	822.497	1.9119	0.385835	4.95522	7.22485e-07	3.1863e-05
Prtn3	109.932	1.90866	0.560382	3.406	0.000659232	0.00984109
1700066B19Rik	41.8309	1.90726	0.503356	3.78908	0.000151204	0.00301286
Dll4	131.527	1.89994	0.581438	3.26765	0.00108445	0.0144214
Pigr	1783.41	1.89905	0.392057	4.84381	1.27375e-06	5.2656e-05
Tmem125	410.143	1.89735	0.36082	5.25844	1.45285e-07	7.49901e-06
Fam49a	429.928	1.89	0.389366	4.85405	1.20967e-06	5.05793e-05
Alpk2	60.5836	1.88809	0.631924	2.98785	0.00280949	0.0290685
Zc3h12a	2121.96	1.88302	0.471138	3.99675	6.42169e-05	0.00149856
Ackr3	1226.7	1.88	0.275858	6.81511	9.41928e-12	1.26551e-09
Card14	108.562	1.87227	0.517995	3.61446	0.000300974	0.0053083
Nsg1	204.857	1.86164	0.541649	3.43699	0.000588223	0.00903195
Wdr72	113.624	1.85902	0.398989	4.65933	3.17243e-06	0.000118185
Tie1	230.835	1.85586	0.631281	2.93983	0.00328393	0.0327354
Arhgef15	249.723	1.85303	0.417094	4.4427	8.88355e-06	0.000285273
Cdh13	721.12	1.85148	0.360019	5.14273	2.70771e-07	1.3142e-05
Pde8a	113.857	1.85145	0.493534	3.7514	0.000175847	0.0034109
Gm12366	20.6811	1.84836	0.454382	4.06785	4.74485e-05	0.00116652
Arhgdib	2629.65	1.84574	0.345273	5.34575	9.00455e-08	5.01159e-06
Lrrc32	1072.57	1.8441	0.44623	4.13263	3.58634e-05	0.000924253
Bmp6	48.5012	1.84013	0.427175	4.30767	1.64987e-05	0.000482341
Nfatc1	777.14	1.83463	0.266051	6.89579	5.35649e-12	7.52875e-10
Zfp993	142.515	1.83014	0.495396	3.69429	0.000220502	0.00409037
Pstpip1	499.954	1.82929	0.549312	3.33015	0.000867986	0.0122187
Scnn1g	286.239	1.82663	0.496162	3.68151	0.000231854	0.00427061
Ric3	73.7766	1.82094	0.394196	4.61938	3.84883e-06	0.000138165
Rnf150	790.343	1.81966	0.374093	4.86418	1.14935e-06	4.82779e-05
Depp1	101.574	1.8177	0.433535	4.19274	2.75606e-05	0.000748272
Syt3	41.5671	1.81155	0.487853	3.71331	0.000204566	0.00385741
Tnf	1744.2	1.81085	0.454934	3.98046	6.87823e-05	0.00158686
Ltb4r2	311.956	1.8065	0.387324	4.66405	3.10045e-06	0.000116089
Syngr1	135.729	1.80363	0.509317	3.54126	0.000398217	0.00661474
Artn	88.549	1.80138	0.477393	3.77337	0.000161054	0.00316769
N4bp3	1383.4	1.80016	0.279855	6.43248	1.25539e-10	1.38184e-08
Tnfrsf1b	844.188	1.79481	0.62737	2.86084	0.00422517	0.0394091
Pappa	1010.83	1.79182	0.64743	2.76758	0.00564741	0.0482645
Sfrp2	382.312	1.78873	0.617198	2.89815	0.00375373	0.036266
Slc16a10	364.013	1.78806	0.581964	3.07246	0.00212301	0.0238864
Sulf1	666.648	1.78286	0.494598	3.60466	0.000312561	0.00544954
Nhs	244.266	1.7645	0.341785	5.16261	2.43529e-07	1.20114e-05
Gpr179	209.55	1.75576	0.53916	3.25648	0.00112803	0.0147858
Rps6kl1	153.338	1.75046	0.345019	5.07351	3.90541e-07	1.81577e-05
Apoc4	26.4889	1.73244	0.606878	2.85467	0.00430816	0.0399385
Dnase1l3	159.494	1.72764	0.579991	2.97874	0.0028944	0.0297784
Spock2	235.485	1.7193	0.562934	3.05417	0.00225682	0.0248414
Kdr	229.098	1.71768	0.609074	2.82016	0.00480004	0.0429722
Znrf3	1235.77	1.71606	0.286557	5.98855	2.11721e-09	1.72704e-07
Prodh	104.782	1.71327	0.40461	4.23438	2.29184e-05	0.000645247
Slc26a9	108.421	1.70437	0.528095	3.2274	0.00124922	0.0158953
Tgfb2	562.716	1.7024	0.588358	2.89348	0.00380995	0.0366268
Ggt6	585.434	1.69933	0.41137	4.1309	3.61349e-05	0.00092994
Stc1	364.133	1.68834	0.380063	4.44225	8.90212e-06	0.000285367
Btbd19	877.052	1.68659	0.225752	7.47101	7.95845e-14	1.65246e-11
Bok	1564.54	1.68218	0.320527	5.24816	1.53626e-07	7.88497e-06
Nhsl1	6350.39	1.68051	0.23145	7.26078	3.84858e-13	6.76165e-11
Rab32	481.079	1.6801	0.250741	6.70054	2.07644e-11	2.63477e-09
Gpat3	114.067	1.67981	0.429679	3.90945	9.25053e-05	0.00201942
Gm4735	69.7854	1.6798	0.544623	3.08433	0.00204009	0.0231797
Slc7a11	499.767	1.67851	0.395209	4.24713	2.16523e-05	0.000614333
Bcl11b	1874.31	1.67531	0.475199	3.5255	0.000422684	0.00694851
S100a14	8912.09	1.67388	0.419288	3.99219	6.54662e-05	0.00152188
Celsr1	1855.56	1.66954	0.414356	4.02925	5.59562e-05	0.00134001
Mesp2	46.7376	1.66813	0.480924	3.46858	0.000523213	0.0082311
Susd1	268.609	1.66471	0.423316	3.93254	8.4054e-05	0.00187526
Kcnk6	360.376	1.66391	0.382585	4.34912	1.36687e-05	0.000414187
Sult2b1	614.323	1.65699	0.383015	4.32617	1.51723e-05	0.000450047
Atp6v0a4	365.557	1.65277	0.275489	5.99941	1.9804e-09	1.63737e-07
Fut9	162.56	1.65222	0.452043	3.65501	0.000257169	0.00463411
Plk3	2272.51	1.65094	0.364836	4.52516	6.0349e-06	0.000204962
Nod2	476.21	1.64893	0.416755	3.95659	7.60287e-05	0.00171554
Crybg2	724.571	1.64685	0.33521	4.91288	8.97475e-07	3.86761e-05
Tns3	8249.16	1.64196	0.44798	3.66526	0.000247085	0.00449228
Mall	899.937	1.64092	0.504235	3.25429	0.00113677	0.0148577
Odc1	7616.7	1.6382	0.33242	4.92811	8.30285e-07	3.59501e-05
Edar	668.514	1.63482	0.580113	2.8181	0.00483087	0.0431848
Rasip1	148.626	1.63098	0.527949	3.08928	0.00200643	0.0229134
Lrg1	834.664	1.62834	0.368915	4.41386	1.01544e-05	0.000321562
Cdhr1	765.853	1.62667	0.452196	3.59726	0.000321583	0.00556963
Klf4	15750.9	1.62612	0.345404	4.70788	2.50312e-06	9.6086e-05
Nkd2	5178.63	1.62378	0.57237	2.83694	0.00455477	0.0413505
Slc16a6	659.78	1.62307	0.417901	3.88386	0.00010281	0.00217928
Kcnmb4	117.332	1.62041	0.5472	2.96128	0.00306366	0.0311168
Trpv3	429.013	1.61461	0.322771	5.00235	5.66348e-07	2.55514e-05
Mal	362.126	1.6146	0.442717	3.64701	0.00026531	0.00476202
Gcat	727.313	1.61302	0.281923	5.72148	1.05599e-08	7.42118e-07
Sfn	33941.8	1.61298	0.410772	3.92671	8.61167e-05	0.00190962
D16Ertd472e	997.667	1.61195	0.265375	6.07425	1.24568e-09	1.08386e-07
Muc4	731.041	1.60894	0.421618	3.81612	0.000135568	0.00274319
Atp6v1c2	1305.64	1.60838	0.42893	3.74975	0.000177011	0.00342984
Nrp2	1571.3	1.60716	0.28664	5.60688	2.06008e-08	1.34917e-06
Hspa1a	19444.3	1.60351	0.48968	3.27461	0.00105807	0.0141323
Scn8a	24.4451	1.59706	0.551088	2.89802	0.00375522	0.036266
Nkpd1	98.408	1.59588	0.34345	4.64662	3.37421e-06	0.000124051
Ass1	3384.41	1.59327	0.334373	4.76494	1.88912e-06	7.56975e-05
Gjb4	1626.43	1.58911	0.275963	5.7584	8.49142e-09	6.10847e-07
Gjb6	249.778	1.58591	0.488932	3.24362	0.00118023	0.0152188
Cfap69	49.8389	1.5856	0.34918	4.54093	5.60054e-06	0.000191635
Trpv4	399.814	1.58196	0.4869	3.24905	0.0011579	0.0150263
Il4ra	4550.97	1.58189	0.497042	3.1826	0.00145958	0.0180358
Rhbdl3	541.043	1.5744	0.297553	5.29115	1.21548e-07	6.49394e-06
Slc24a3	203.184	1.57409	0.377368	4.17124	3.02945e-05	0.000806911
Rgs9	78.7109	1.57339	0.391393	4.01998	5.82039e-05	0.00137759
Trp63	7361.97	1.57236	0.338065	4.65106	3.3024e-06	0.000121747
Nrarp	1285.89	1.57228	0.426184	3.6892	0.000224961	0.00416041
Mef2c	442.054	1.57194	0.459352	3.42208	0.000621437	0.00944666
Zfp385a	1672.21	1.56744	0.2449	6.40034	1.55031e-10	1.66631e-08
Slc27a3	1266.82	1.56715	0.23472	6.67669	2.444e-11	3.03787e-09
Edn2	59.282	1.56435	0.492291	3.1777	0.0014845	0.0182535
Cd300lg	72.8634	1.56232	0.561958	2.78014	0.00543347	0.0468304
Cxcl16	2300.16	1.56091	0.523092	2.984	0.00284503	0.0293698
Irs2	2106.2	1.55822	0.482741	3.22786	0.00124718	0.0158876
Mfsd7a	145.105	1.55783	0.434323	3.5868	0.000334756	0.00572674
Pecam1	562.811	1.55126	0.487376	3.18287	0.00145823	0.0180358
Gm9761	459.935	1.55106	0.456598	3.397	0.000681297	0.0100574
Rasgrp3	88.1587	1.54855	0.538951	2.87326	0.0040626	0.0383688
Slc39a2	61.399	1.54588	0.397664	3.88741	0.000101318	0.00215685
Zdhhc14	119.926	1.54378	0.42385	3.64229	0.000270224	0.00484073
Map3k8	624.591	1.54155	0.485858	3.17284	0.00150955	0.0184498
Orm1	26.2738	1.53717	0.523746	2.93495	0.00333602	0.0330922
Rel	899.77	1.53482	0.474956	3.23149	0.00123147	0.0157463
Rgs14	148.444	1.5291	0.486387	3.14379	0.00166778	0.0199696
Calhm2	280.025	1.52847	0.29041	5.26315	1.41605e-07	7.3926e-06
Slc28a3	474.824	1.5245	0.504273	3.02317	0.00250139	0.026854
Ly6a	14121.6	1.5232	0.36692	4.15131	3.30571e-05	0.000865358
Amz1	188.716	1.52258	0.50898	2.99144	0.00277666	0.0288941
Gvin1	598.893	1.5213	0.516438	2.94575	0.00322173	0.0323093
Slc16a1	2056.99	1.51956	0.377068	4.02993	5.57923e-05	0.0013392
Sgk3	564.572	1.51714	0.407702	3.72121	0.000198272	0.00376202
Pim3	2190.98	1.51337	0.321398	4.70872	2.49279e-06	9.5891e-05
Ltf	12654.8	1.51248	0.476573	3.17366	0.00150528	0.0184223
Dnah8	186.303	1.51036	0.475043	3.17941	0.00147575	0.0181582
Dkk2	225.562	1.50567	0.358406	4.20103	2.65708e-05	0.000726798
Barx2	475.274	1.49851	0.48269	3.1045	0.00190603	0.021959
Eva1c	373.416	1.49847	0.303027	4.94498	7.61502e-07	3.33673e-05
Frat2	141.775	1.49054	0.361117	4.12757	3.66621e-05	0.000939537
Tmem221	68.2889	1.47791	0.479544	3.08191	0.00205674	0.0233276
Rnd1	95.7114	1.47744	0.496133	2.9779	0.00290226	0.0298425
Gm45855	29.6105	1.47103	0.528964	2.78097	0.00541966	0.0467554
Nupr1	2990.95	1.46981	0.278989	5.26834	1.37664e-07	7.22815e-06
Cpsf4l	74.6121	1.46799	0.270987	5.41722	6.05339e-08	3.54511e-06
Rassf4	1383.41	1.46673	0.48357	3.03313	0.00242028	0.0262298
Nt5e	1986.31	1.46495	0.51565	2.84098	0.00449748	0.04111
Fgd3	295.642	1.46162	0.5042	2.89888	0.00374497	0.0362245
Tnfaip8l1	173.075	1.46154	0.310285	4.71031	2.47339e-06	9.53456e-05
Gm8741	159.177	1.46016	0.445748	3.27575	0.00105381	0.0141079
Urah	1665.37	1.45905	0.44892	3.25014	0.00115347	0.0149902
Lpar5	158.178	1.45849	0.427628	3.41065	0.00064808	0.00973026
Dcn	13989.4	1.45211	0.372338	3.89998	9.62023e-05	0.00207289
Rnf149	3214.72	1.45107	0.376714	3.85193	0.000117191	0.00243332
Fosb	49065.4	1.4507	0.289361	5.01345	5.34623e-07	2.43537e-05
Prkch	1108.1	1.44655	0.289498	4.99675	5.83045e-07	2.61113e-05
Cyp7b1	298.981	1.44602	0.412994	3.50132	0.000462966	0.00750605
Cdk6	1579.82	1.44581	0.359865	4.01765	5.87812e-05	0.00138946
Acsl1	984.666	1.44572	0.356247	4.05821	4.94505e-05	0.00120635
Rerg	1407.57	1.44348	0.378243	3.81629	0.000135476	0.00274319
Xdh	4266.29	1.44321	0.190099	7.59191	3.15235e-14	7.57892e-12
Samd12	636.778	1.44112	0.312084	4.61775	3.87928e-06	0.000138985
Cd274	518.777	1.44061	0.478054	3.01349	0.0025826	0.0274356
Lgals7	13881.2	1.44056	0.338889	4.25083	2.12984e-05	0.000605233
Tmem154	855.873	1.43908	0.405736	3.54685	0.00038987	0.00650567
Ocstamp	69.7482	1.43815	0.473718	3.03588	0.00239838	0.0260852
Cacna2d3	59.2532	1.43532	0.515726	2.7831	0.00538419	0.0465373
Col17a1	17624.3	1.4352	0.365795	3.9235	8.72725e-05	0.00193056
Cxcl11	41.6553	1.43262	0.495985	2.88844	0.00387154	0.037037
Crabp2	3036.1	1.42862	0.302798	4.71807	2.38095e-06	9.27606e-05
Gm2225	40.4439	1.42847	0.436743	3.27074	0.00107267	0.0142959
Nuak2	510.114	1.42838	0.463132	3.08418	0.00204116	0.0231797
Krt80	782.503	1.42681	0.364926	3.90987	9.23445e-05	0.00201832
Card11	93.8118	1.42248	0.425189	3.34552	0.00082129	0.0117148
Cpox	1412.94	1.42196	0.202106	7.03572	1.98231e-12	3.04376e-10
Tent5b	727.294	1.42134	0.271591	5.23339	1.66431e-07	8.47083e-06
Prss22	348.76	1.42111	0.4475	3.17567	0.0014949	0.018332
Igf1r	711.666	1.42033	0.307175	4.62385	3.76686e-06	0.000136024
Frmd4b	1519.2	1.42018	0.376133	3.77575	0.000159526	0.0031512
Rnaset2a	1192.58	1.4102	0.418158	3.37241	0.000745124	0.0107798
B3gnt8	384.389	1.40235	0.263582	5.32035	1.03567e-07	5.70795e-06
Tiparp	1516.96	1.39898	0.488373	2.86457	0.00417572	0.0390875
Pdgfa	1381.15	1.39677	0.239658	5.8282	5.60277e-09	4.19565e-07
Lipg	351.414	1.39543	0.409801	3.40514	0.00066131	0.00986356
Cxadr	5777.69	1.39003	0.314278	4.42293	9.73703e-06	0.000309417
Prr5l	128.523	1.38744	0.495362	2.80086	0.00509659	0.0448794
Foxc1	1855.42	1.38535	0.370417	3.73997	0.000184042	0.00354992
Ptger2	94.615	1.38501	0.489627	2.8287	0.0046737	0.0421509
Fam71a	254.78	1.3744	0.308918	4.44906	8.62474e-06	0.00027843
Hspb1	9500.33	1.37386	0.242604	5.66297	1.48775e-08	1.01056e-06
Bmp7	2774.76	1.37159	0.254035	5.39922	6.69297e-08	3.88235e-06
Prss12	749.627	1.36893	0.419804	3.26089	0.00111062	0.0146196
Dnajb1	8161.29	1.36198	0.237167	5.74269	9.31821e-09	6.65087e-07
Zfp703	4718.65	1.35974	0.301652	4.50764	6.55512e-06	0.000220489
Flrt2	664.424	1.35685	0.483156	2.80831	0.0049802	0.0440883
Cerk	1552.31	1.3563	0.425711	3.18596	0.00144277	0.0179005
Slc16a11	150.849	1.35603	0.433119	3.13085	0.00174301	0.0206271
Dysf	654.512	1.35567	0.356118	3.80679	0.000140782	0.00283301
Gm45551	431.44	1.35347	0.341435	3.96405	7.36888e-05	0.00167671
Htra1	4130.22	1.35323	0.303328	4.46127	8.14742e-06	0.000265365
Pinlyp	132.998	1.3496	0.409195	3.29818	0.00097314	0.0133593
Rras2	673.781	1.34844	0.247239	5.45401	4.9247e-08	2.94066e-06
Cdsn	138.985	1.34451	0.289566	4.64319	3.43077e-06	0.000125878
Plcxd1	447.662	1.34345	0.345606	3.88722	0.000101398	0.00215685
Mgll	578.98	1.343	0.469738	2.85904	0.00424925	0.039573
Slc2a9	932.889	1.34255	0.3491	3.84575	0.000120186	0.002481
Eepd1	163.543	1.34111	0.460864	2.90998	0.00361447	0.0351669
Eppk1	1930.52	1.33975	0.168651	7.94394	1.95851e-15	5.59156e-13
Nt5dc2	2521.38	1.33835	0.362273	3.69431	0.000220489	0.00409037
Tnfrsf22	257.531	1.33781	0.209939	6.37239	1.86102e-10	1.97701e-08
Nfkbia	7055.67	1.33763	0.374461	3.57216	0.000354055	0.00599564
Jag2	4122.63	1.33104	0.288005	4.6216	3.80797e-06	0.000137237
Tshz2	1134.29	1.32796	0.328459	4.043	5.27722e-05	0.00127497
Calml3	2230.88	1.32321	0.312395	4.2357	2.27842e-05	0.000642458
Car12	9116.08	1.31703	0.376758	3.49569	0.000472837	0.00763898
Lyrm1	99.4505	1.31553	0.401504	3.2765	0.00105102	0.0140896
Cebpa	2238.87	1.31167	0.462016	2.83901	0.00452539	0.041282
Gbp5	619.257	1.30293	0.415353	3.13692	0.0017073	0.0203098
Zfp747	208.895	1.30047	0.434862	2.99054	0.00278485	0.0289173
Mylip	1459.67	1.29935	0.297043	4.37428	1.21834e-05	0.000375404
Slco3a1	1317.74	1.2979	0.316309	4.10327	4.07348e-05	0.00102381
Sertad1	1852.88	1.29555	0.394221	3.28635	0.00101494	0.0137402
Pglyrp1	225.368	1.29323	0.354352	3.64958	0.000262671	0.00472394
Hagh	1364.75	1.29152	0.329115	3.92422	8.7011e-05	0.00192711
C3	5393.06	1.28246	0.34884	3.67635	0.000236598	0.00434485
Gm12918	5429.25	1.28023	0.459912	2.78365	0.0053751	0.046497
Exoc3l2	244.244	1.27857	0.348253	3.67137	0.000241254	0.00441261
Plekha7	2492.2	1.27781	0.299165	4.27126	1.94372e-05	0.000558422
Ctsd	25173.1	1.26933	0.247525	5.12809	2.92704e-07	1.40008e-05
Adamtsl5	433.323	1.26898	0.365864	3.46846	0.000523453	0.0082311
Clcf1	146.261	1.26526	0.413593	3.05919	0.00221933	0.0246461
Lrrc8c	599.037	1.26308	0.349547	3.61347	0.000302121	0.00531826
AA986860	223.196	1.26302	0.236931	5.33074	9.78134e-08	5.4159e-06
Arid5a	2002.28	1.26135	0.38718	3.25778	0.00112288	0.0147393
Porcn	762.031	1.26032	0.311693	4.04346	5.26687e-05	0.00127465
Procr	433.212	1.25815	0.368554	3.41375	0.000640756	0.00965998
Spns2	1715.69	1.25781	0.256102	4.91137	9.04414e-07	3.88834e-05
Mtmr10	881.774	1.25093	0.372346	3.35958	0.000780611	0.011231
Endod1	2193.42	1.24564	0.434248	2.86849	0.00412434	0.0387256
Kif7	277.261	1.24547	0.426833	2.91793	0.00352369	0.0345412
Bach2	261.573	1.24452	0.278411	4.47008	7.81921e-06	0.000257428
Kcnh1	1005.94	1.24262	0.390038	3.1859	0.00144305	0.0179005
Sco2	116.837	1.23208	0.363012	3.39406	0.000688647	0.0101231
Pfkfb4	468.343	1.23118	0.426087	2.8895	0.0038586	0.0369519
Eogt	1103.91	1.23073	0.256	4.80753	1.52806e-06	6.23231e-05
Uba52	8354.14	1.22998	0.434297	2.83212	0.00462399	0.0418472
Sema3c	2109.83	1.2288	0.40228	3.0546	0.00225364	0.0248214
Disp1	432.997	1.22764	0.313497	3.91596	9.00469e-05	0.00197995
Mapk15	66.2458	1.22222	0.419546	2.91319	0.00357759	0.0349197
Tmem176b	5689.72	1.21972	0.290691	4.19592	2.71764e-05	0.000741146
Fbln1	3129.78	1.2189	0.411886	2.9593	0.00308338	0.031274
Cltb	3903.43	1.21679	0.335297	3.62899	0.000284537	0.0050673
Trim16	553.959	1.21519	0.265796	4.57189	4.8334e-06	0.000168899
Ggta1	1229.29	1.20799	0.223174	5.41274	6.20673e-08	3.6233e-06
Hp	4951.74	1.20501	0.427059	2.82166	0.00477763	0.0428615
Tiam2	1077.23	1.20497	0.250865	4.80328	1.56091e-06	6.35209e-05
Dusp1	18990	1.19503	0.330301	3.61801	0.000296873	0.00525626
Tnk1	1303.9	1.19478	0.286285	4.17341	3.00074e-05	0.000800466
Gimap9	261.789	1.19476	0.214323	5.57456	2.48157e-08	1.60223e-06
Serpinb1a	325.78	1.19425	0.404474	2.95259	0.00315118	0.0317937
Kbtbd11	195.321	1.18967	0.382349	3.11148	0.00186154	0.0215688
Rnf43	1649.14	1.18691	0.294768	4.02658	5.65949e-05	0.00135042
Ptpre	686.474	1.1868	0.388376	3.0558	0.00224464	0.0247771
Lrp4	1997.87	1.18149	0.329208	3.58888	0.000332104	0.00571174
Rap2a	1457.67	1.17907	0.217408	5.42332	5.85033e-08	3.45946e-06
Etv3	2717.41	1.1789	0.262292	4.49461	6.96991e-06	0.000232398
Phyhip	768.958	1.17884	0.38657	3.04948	0.00229241	0.0251724
Bglap3	136.338	1.17865	0.411898	2.86152	0.00421615	0.0393651
Pcsk6	936.653	1.17855	0.322261	3.65711	0.000255072	0.00460086
Nedd9	2589.14	1.17663	0.228022	5.16018	2.46718e-07	1.20859e-05
Amotl2	1763.54	1.17385	0.291821	4.0225	5.75834e-05	0.00137
Fosl2	7891.39	1.17231	0.327478	3.57982	0.000343832	0.00585508
Arl4c	4179.09	1.16857	0.297571	3.92703	8.59998e-05	0.00190962
S100a10	8080.86	1.16381	0.407451	2.85632	0.00428578	0.0397607
Slc38a2	8360.98	1.16113	0.282027	4.11708	3.83711e-05	0.000979213
Hspa1b	35113.3	1.15928	0.364596	3.17963	0.00147463	0.0181582
Rgs12	3200.2	1.14515	0.355419	3.22198	0.00127307	0.0160757
Large2	2039.49	1.14319	0.343646	3.32664	0.000878986	0.012345
Dusp14	548.264	1.14301	0.374373	3.05314	0.00226459	0.0249118
Icam1	3882.34	1.13611	0.292094	3.88953	0.000100439	0.00214646
Idi1	2806.32	1.1347	0.248193	4.57185	4.83442e-06	0.000168899
Ldhb	1425.73	1.13417	0.397836	2.85084	0.0043604	0.0402594
Lrfn3	57.6568	1.13405	0.39123	2.89868	0.00374738	0.0362286
Ngef	578.702	1.13404	0.320434	3.53907	0.000401546	0.00664589
Slc25a29	230.764	1.13038	0.248654	4.54599	5.46782e-06	0.000187797
Lck	128.003	1.123	0.315177	3.56306	0.000366551	0.00617862
Ccdc85b	1113.51	1.12241	0.399927	2.80653	0.00500781	0.0442801
Rps13-ps2	4057.74	1.12129	0.29849	3.75653	0.000172282	0.00334887
Mb21d2	407.049	1.1196	0.322194	3.47494	0.000510968	0.00809749
Susd6	7562.59	1.11723	0.24131	4.62986	3.65907e-06	0.00013345
Efnb2	1976.51	1.11295	0.229878	4.84148	1.28875e-06	5.3156e-05
Fgd6	796.765	1.10615	0.295886	3.73843	0.000185175	0.00356534
Hyal1	1003.26	1.10362	0.264701	4.16931	3.05527e-05	0.000811422
Pnp	3158.82	1.09996	0.294988	3.72882	0.000192382	0.00367699
Kif21b	436.302	1.09885	0.39447	2.78564	0.00534219	0.0463718
P3h2	797.004	1.09811	0.334046	3.28729	0.00101156	0.0137116
Panx1	519.226	1.09198	0.301922	3.61677	0.000298298	0.00527512
Nebl	762.121	1.08997	0.196757	5.53971	3.02967e-08	1.91551e-06
Runx2	1307.74	1.08882	0.223805	4.86502	1.14443e-06	4.82123e-05
Ebp	1273.96	1.08824	0.205557	5.2941	1.19601e-07	6.44646e-06
Bbc3	378.164	1.08647	0.386185	2.81335	0.00490289	0.0435727
Khk	185.171	1.0856	0.353856	3.06793	0.00215549	0.0241775
Rps6ka4	2058.11	1.08525	0.259006	4.19004	2.78911e-05	0.000755
Lbp	794.811	1.08248	0.332624	3.25437	0.00113643	0.0148577
Calm1	9305	1.07564	0.339042	3.17259	0.00151086	0.0184535
Snx18	1213.99	1.06443	0.323941	3.28587	0.00101668	0.0137402
Psat1	2058.01	1.06353	0.264302	4.0239	5.72411e-05	0.00136364
Hsd17b7	1239.4	1.06332	0.240591	4.41962	9.88758e-06	0.000313656
Nfkbiz	7446.41	1.06158	0.372687	2.84845	0.00439323	0.0404603
Efcab1	159.729	1.06033	0.341669	3.1034	0.00191313	0.0219992
Dedd2	1094.04	1.05839	0.352429	3.00314	0.00267212	0.0281088
Lama3	5848.37	1.05685	0.324136	3.26051	0.00111213	0.0146196
Cux1	3190.71	1.05164	0.218464	4.81379	1.48094e-06	6.08085e-05
Cd44	12226.8	1.05136	0.35715	2.94374	0.00324276	0.0324667
Acadsb	1239.8	1.051	0.281762	3.73011	0.000191396	0.00366197
Tlr5	243.15	1.04918	0.278303	3.76991	0.000163303	0.00319815
Them6	169.389	1.04591	0.358686	2.91595	0.00354605	0.0346825
Megf9	2318.38	1.0441	0.265253	3.93626	8.27624e-05	0.00185096
Usp31	736.321	1.03775	0.342431	3.03053	0.00244126	0.0264415
Nipal4	281.957	1.03734	0.27438	3.78069	0.000156395	0.00310614
Rgcc	390.169	1.03462	0.375452	2.75566	0.00585747	0.049711
Peli2	328.589	1.02935	0.321461	3.2021	0.00136431	0.0170745
Sgk1	6180.43	1.02398	0.28805	3.55487	0.000378159	0.0063392
Vdr	2686.03	1.02167	0.366901	2.78459	0.00535951	0.0464153
Aen	831.851	1.02124	0.218285	4.67847	2.89021e-06	0.000109564
Trnp1	175.71	1.02094	0.353053	2.89176	0.00383095	0.0367836
Nfe2l2	3256.15	1.0206	0.284161	3.59162	0.000328628	0.00567015
Atp10a	526.327	1.01982	0.210978	4.83377	1.33968e-06	5.51321e-05
Cldnd1	2079.34	1.01638	0.181505	5.59973	2.14689e-08	1.401e-06
Myo5a	2328.54	1.01524	0.33597	3.02182	0.0025126	0.0269268
Prdm1	820.755	1.01512	0.341004	2.97687	0.00291212	0.029927
Rftn2	402.201	1.00863	0.35097	2.87383	0.00405525	0.0383385
Ppfibp2	1234.47	1.0034	0.172248	5.82533	5.6999e-09	4.24053e-07
Castor1	286.424	1.00125	0.282528	3.54391	0.000394247	0.00656073
Nipal1	237.752	-1.00653	0.21135	-4.76239	1.91317e-06	7.61599e-05
Kank2	1036.69	-1.00729	0.302424	-3.33072	0.00086623	0.0122034
Glmn	191.842	-1.00902	0.274568	-3.67495	0.000237899	0.00436434
Phka1	255.537	-1.01003	0.330213	-3.05871	0.0022229	0.0246461
Fam171a2	616.103	-1.01178	0.276337	-3.66139	0.000250855	0.00453824
Zfp664	4131.27	-1.01288	0.310539	-3.26167	0.00110758	0.0146121
Aox1	564.7	-1.01559	0.352481	-2.88126	0.0039609	0.0376358
Bend5	136.87	-1.01673	0.325372	-3.12481	0.0017792	0.020936
Spire1	799.958	-1.01841	0.227147	-4.48348	7.34346e-06	0.000243079
Chd6	1902.26	-1.0199	0.286743	-3.55683	0.00037535	0.00630491
Pxylp1	991.858	-1.0214	0.286572	-3.56419	0.000364985	0.00616359
Ifit3b	394.399	-1.02743	0.369398	-2.78135	0.00541325	0.0467222
Phkb	1479.26	-1.02959	0.24362	-4.22621	2.3766e-05	0.00066298
Igf2r	5079.69	-1.03042	0.296788	-3.4719	0.000516786	0.00815433
2300009A05Rik	98.9565	-1.03218	0.285736	-3.61236	0.00030342	0.00533085
Tpmt	203.934	-1.03339	0.295471	-3.49744	0.000469741	0.00759567
Rassf8	992.592	-1.03603	0.175757	-5.89465	3.75484e-09	2.95726e-07
Gsn	10370.8	-1.03655	0.224786	-4.61128	4.00207e-06	0.000141717
Rnf128	649.645	-1.0372	0.250007	-4.14866	3.34423e-05	0.000874187
Tmed3	3296.7	-1.03798	0.310183	-3.34636	0.000818789	0.0116882
Hap1	581.15	-1.03985	0.286651	-3.62757	0.000286099	0.00508671
Gaa	3550.72	-1.04075	0.261455	-3.98063	6.87339e-05	0.00158686
Zbed3	350.027	-1.04111	0.306003	-3.40229	0.000668231	0.00992677
Usp2	177.336	-1.04682	0.368503	-2.84072	0.00450115	0.0411225
Cyth3	1207.62	-1.04834	0.292126	-3.58866	0.000332381	0.00571174
1190002N15Rik	676.929	-1.04854	0.263083	-3.98559	6.7313e-05	0.00155886
Isg15	2532.94	-1.05171	0.371687	-2.82956	0.00466115	0.0420793
Cystm1	676.976	-1.05463	0.349408	-3.01833	0.00254176	0.0271438
Fam210b	2451.44	-1.05591	0.379202	-2.78457	0.00535991	0.0464153
Angptl4	1784.53	-1.06146	0.353419	-3.00341	0.00266971	0.0280997
Dnajc12	160.142	-1.0642	0.336534	-3.16223	0.00156565	0.019021
S1pr2	1125.18	-1.0643	0.257149	-4.13887	3.49024e-05	0.000902033
Pgf	875.535	-1.06974	0.379891	-2.8159	0.00486407	0.0433543
Skida1	122.299	-1.07002	0.307894	-3.47528	0.000510329	0.00809749
Slc29a1	3715.24	-1.07199	0.365229	-2.93513	0.00333409	0.0330922
Stambpl1	476.014	-1.07385	0.297	-3.61565	0.000299592	0.00528903
Mov10	824.963	-1.07614	0.299824	-3.58924	0.000331642	0.00571137
C8g	55.4792	-1.07669	0.379496	-2.83716	0.00455164	0.0413505
Spata13	1208.86	-1.07754	0.291828	-3.69239	0.000222154	0.00411489
Zfp760	93.7363	-1.09067	0.376845	-2.89422	0.00380107	0.0366121
Arhgap29	661.607	-1.09252	0.36	-3.03479	0.00240704	0.0261483
Aldh3a2	1651.15	-1.09375	0.193396	-5.65549	1.55401e-08	1.04304e-06
Nrip2	91.1362	-1.09879	0.38732	-2.83689	0.00455553	0.0413505
Fam110b	228.528	-1.09931	0.379167	-2.89928	0.00374022	0.0361977
Pla2r1	209.278	-1.10037	0.379086	-2.90269	0.0036997	0.0359197
Abhd2	5796.99	-1.10465	0.335393	-3.29358	0.000989201	0.0134886
Zfp704	1617.54	-1.10965	0.265649	-4.17713	2.95213e-05	0.000790928
Pdia5	420.058	-1.1106	0.288415	-3.85072	0.00011777	0.00244256
Pdcd4	2063.41	-1.11275	0.350301	-3.17655	0.00149037	0.0182888
Tln2	2210.06	-1.11384	0.341061	-3.26581	0.00109151	0.0144837
Cdc7	337.64	-1.1166	0.375566	-2.97311	0.00294801	0.0301601
Osbpl10	343.276	-1.12368	0.366354	-3.06719	0.00216082	0.0241927
Has2	1016.46	-1.12568	0.358915	-3.13635	0.00171064	0.0203362
Krt8	21549.3	-1.12596	0.370144	-3.04196	0.00235044	0.0256248
Acot2	214.345	-1.12729	0.360486	-3.12714	0.00176513	0.0208484
Gm5373	53.0938	-1.12825	0.343675	-3.28288	0.00102752	0.0138457
Purg	114.263	-1.1307	0.296535	-3.81303	0.000137276	0.00276945
Dgkh	309.19	-1.13462	0.210803	-5.38236	7.35158e-08	4.21642e-06
Hist1h1e	50.4753	-1.1375	0.338797	-3.35747	0.000786582	0.011308
Nck2	2527.91	-1.14277	0.302735	-3.77482	0.000160123	0.00315948
Rab3ip	888.779	-1.14302	0.282492	-4.04621	5.20525e-05	0.00126141
Nsl1	182.191	-1.14413	0.382704	-2.9896	0.00279345	0.0289563
Socs2	675.576	-1.14446	0.322796	-3.54546	0.000391921	0.00653393
Mettl15	113.551	-1.14701	0.324269	-3.53722	0.000404369	0.00668655
Mapk12	175.648	-1.14735	0.38421	-2.98626	0.0028241	0.0292031
Srl	231.318	-1.15097	0.265877	-4.32896	1.49817e-05	0.000445115
Ccdc68	238.413	-1.15177	0.397055	-2.90077	0.00372244	0.036083
Dusp4	2328.88	-1.15376	0.249945	-4.61605	3.91117e-06	0.00013958
Klhl22	974.09	-1.154	0.168026	-6.868	6.51095e-12	9.01274e-10
Steap1	110.654	-1.15554	0.385376	-2.99847	0.00271336	0.0284443
Rpp38	153.39	-1.15627	0.299918	-3.85529	0.000115592	0.00241106
Slc35a1	598.994	-1.1569	0.213479	-5.41929	5.98371e-08	3.51557e-06
Trim45	191.308	-1.15877	0.336044	-3.44828	0.000564175	0.00869925
Efemp2	1182.36	-1.15985	0.386858	-2.99813	0.00271639	0.0284598
Limk1	994.025	-1.16217	0.317304	-3.66263	0.000249643	0.00452775
Lyplal1	98.517	-1.16684	0.321667	-3.6275	0.000286183	0.00508671
Baiap2l1	542.504	-1.17368	0.389873	-3.01042	0.00260885	0.0275861
Etv5	1773.22	-1.17462	0.360871	-3.25496	0.0011341	0.0148547
Galk1	1289.72	-1.17792	0.260363	-4.52413	6.06438e-06	0.000205582
Arfgef3	231.906	-1.17874	0.413259	-2.85231	0.00434029	0.0401142
Stk39	1674.49	-1.17912	0.265586	-4.43969	9.00888e-06	0.00028778
Wdr19	490.778	-1.17939	0.403566	-2.92241	0.00347332	0.034161
Zfp442	53.1905	-1.18219	0.414775	-2.85019	0.00436935	0.0403216
Lhfpl2	1283	-1.18375	0.377631	-3.13468	0.00172042	0.0204134
Sccpdh	468.504	-1.18849	0.302011	-3.93526	8.31065e-05	0.00185638
Ptn	9413.04	-1.18859	0.34248	-3.47053	0.000519436	0.00818907
Haus3	360.584	-1.18903	0.402548	-2.95376	0.0031393	0.0317264
Adamts3	249.226	-1.18984	0.3243	-3.66894	0.000243561	0.00445034
Skp2	301.457	-1.18994	0.359584	-3.30922	0.000935577	0.0129409
Zfp202	193.177	-1.19218	0.383567	-3.10813	0.00188275	0.021732
5430403G16Rik	59.2644	-1.19371	0.343138	-3.47881	0.000503651	0.00802329
Slc44a3	480.32	-1.19388	0.364773	-3.27293	0.00106438	0.0142063
Ccdc18	152.177	-1.1949	0.285728	-4.18194	2.89035e-05	0.000776655
Acad10	274.519	-1.1985	0.285539	-4.19734	2.70069e-05	0.000737625
Fsd1l	85.2773	-1.21004	0.320234	-3.77862	0.000157701	0.00312528
Cd164	10667.7	-1.22205	0.299998	-4.07354	4.63046e-05	0.00114181
Pck2	1373.22	-1.22212	0.273157	-4.47407	7.67456e-06	0.000253122
Pik3r3	1287.25	-1.22689	0.347857	-3.527	0.000420297	0.00691862
Fam114a1	1519.42	-1.23297	0.193994	-6.35573	2.07441e-10	2.11752e-08
Cldn7	1623.12	-1.23686	0.389338	-3.17683	0.00148893	0.0182844
Samd14	559.624	-1.2414	0.398233	-3.11728	0.00182529	0.0212566
Fgf1	894.921	-1.24518	0.445691	-2.79382	0.00520893	0.0456148
Golm1	681.226	-1.24974	0.383216	-3.26119	0.00110944	0.0146155
Galnt18	1189.9	-1.25388	0.391376	-3.20378	0.00135636	0.0169866
Angptl2	2269.79	-1.25516	0.45102	-2.78293	0.00538697	0.0465393
Ttll3	167	-1.25607	0.320223	-3.92247	8.76466e-05	0.00193649
Rhbdl1	76.0988	-1.25977	0.411943	-3.05811	0.00222735	0.0246805
Lzts3	353.05	-1.26509	0.268118	-4.7184	2.37709e-06	9.27606e-05
Gm37240	274.38	-1.26643	0.432062	-2.93113	0.00337735	0.0333933
Cd164l2	238.77	-1.27041	0.408796	-3.10768	0.00188562	0.0217513
Cdkl5	787.927	-1.27305	0.41274	-3.08438	0.00203978	0.0231797
Arhgap6	203.668	-1.27654	0.286253	-4.4595	8.21528e-06	0.000267099
Pomgnt2	188.284	-1.28026	0.204466	-6.26148	3.81343e-10	3.61031e-08
Hdac11	915.532	-1.28046	0.353747	-3.61972	0.000294923	0.00523188
Papss2	471.02	-1.28225	0.373013	-3.43754	0.000587017	0.009021
Tgfbr3l	64.3887	-1.28285	0.396344	-3.23671	0.00120918	0.0155373
AC133103.1	25.0658	-1.28288	0.409084	-3.13598	0.00171281	0.0203487
Tgm2	9965.7	-1.28294	0.448503	-2.86048	0.00422996	0.0394336
Tmc8	126.188	-1.28365	0.439417	-2.92125	0.00348625	0.0342293
Eid2	110.489	-1.28581	0.303763	-4.23292	2.30675e-05	0.000648444
Ccdc62	223.776	-1.28655	0.395412	-3.25369	0.00113916	0.0148783
Adig	68.3109	-1.28812	0.441279	-2.91906	0.00351094	0.0344347
Cdc42ep5	392.246	-1.29108	0.28372	-4.55055	5.35062e-06	0.000184814
Tmem266	93.513	-1.29134	0.429805	-3.00448	0.00266034	0.0280333
Sgms2	319.404	-1.29274	0.397217	-3.25451	0.0011359	0.0148577
2024-09-06	622.217	-1.29918	0.290913	-4.46589	7.97384e-06	0.000261107
Ank2	326.316	-1.30003	0.429079	-3.02982	0.00244701	0.026488
Wdr25	141.806	-1.30005	0.401913	-3.23467	0.00121785	0.0156159
Grtp1	191.204	-1.30052	0.23013	-5.65124	1.59292e-08	1.06226e-06
Arhgap28	316.477	-1.30216	0.272979	-4.77018	1.84062e-06	7.39161e-05
Tcea3	218.553	-1.30724	0.434009	-3.01201	0.00259521	0.0274901
Prag1	3168.71	-1.30748	0.298032	-4.38704	1.14901e-05	0.000356448
Cenpv	316.713	-1.30959	0.364484	-3.593	0.000326889	0.00565081
Limch1	343.883	-1.32144	0.46861	-2.81991	0.00480375	0.0429844
Fermt2	2214.31	-1.32405	0.412206	-3.21211	0.00131764	0.0165698
Chpf	1375.3	-1.32632	0.362539	-3.65843	0.000253768	0.00458187
Spon2	799.338	-1.32906	0.443335	-2.99787	0.00271875	0.0284682
Nutf2	299.11	-1.33349	0.422796	-3.15398	0.00161059	0.0194505
Ppp1r9a	235.915	-1.33795	0.38966	-3.43362	0.000595571	0.00912177
Ccdc102a	502.688	-1.3456	0.372984	-3.60767	0.000308958	0.00541042
Gclm	2353.93	-1.34588	0.263071	-5.11602	3.12058e-07	1.47939e-05
Ccdc92	359.028	-1.35531	0.339428	-3.99292	6.52653e-05	0.00151914
Gm7162	20.507	-1.3609	0.476463	-2.85625	0.00428681	0.0397607
Lamb1	6904.58	-1.36215	0.420441	-3.2398	0.00119613	0.0153805
Enox1	155.304	-1.3634	0.463276	-2.94295	0.00325104	0.0325318
Fam161a	96.2725	-1.36644	0.467373	-2.92365	0.00345955	0.0341081
Olfm2	136.623	-1.36674	0.401016	-3.4082	0.000653936	0.00979265
Cobl	845.132	-1.36723	0.410465	-3.33092	0.000865581	0.0122034
Npas2	181.682	-1.36885	0.408056	-3.35455	0.000794934	0.0114011
Saxo2	24.8567	-1.37808	0.454043	-3.03513	0.00240429	0.026134
Timp1	959.122	-1.37911	0.500496	-2.75549	0.00586049	0.0497135
Cldn2	155.872	-1.3802	0.371943	-3.71077	0.000206627	0.00388825
Nr2f2	321.724	-1.3807	0.493901	-2.7955	0.00518189	0.045499
Zfp334	177.471	-1.38266	0.42805	-3.23013	0.00123733	0.0157982
Slc9a3r2	786.78	-1.38577	0.371844	-3.72676	0.00019396	0.00369556
Lgals1	10789.4	-1.3913	0.487828	-2.85203	0.00434404	0.0401286
Raver2	142.759	-1.39193	0.460514	-3.02255	0.00250653	0.0268776
Trp53inp1	1256.03	-1.40214	0.394521	-3.55404	0.000379357	0.00635345
Dbil5	19.9216	-1.41096	0.481636	-2.92952	0.00339485	0.0335301
Agps	4636.22	-1.4112	0.36493	-3.86704	0.000110163	0.00232146
Ulbp1	127.387	-1.42283	0.342456	-4.15477	3.2561e-05	0.000856051
Col4a5	6242.99	-1.42665	0.38	-3.75435	0.000173795	0.00337468
Nxph3	194.849	-1.42842	0.471839	-3.02735	0.00246711	0.0265953
Celf4	311.107	-1.42919	0.503614	-2.83786	0.00454171	0.0413484
Spry1	1077.33	-1.4302	0.388886	-3.67769	0.000235358	0.00432643
Ntrk3	280.246	-1.43401	0.491803	-2.91582	0.00354759	0.0346825
2810021J22Rik	127.17	-1.43836	0.386251	-3.72391	0.000196163	0.00372975
Pir	723.239	-1.43919	0.498457	-2.88728	0.00388586	0.0371521
Hey1	1068.15	-1.44538	0.352572	-4.09954	4.13978e-05	0.00103761
Slc9a5	391.369	-1.4515	0.355852	-4.07893	4.5243e-05	0.00111865
H2-Q2	176.71	-1.45632	0.367662	-3.96103	7.4627e-05	0.00169179
Ranbp17	153.309	-1.45758	0.406184	-3.58849	0.000332601	0.00571174
Plekha6	2379.77	-1.46539	0.338433	-4.32992	1.49161e-05	0.000443888
Begain	262.275	-1.46962	0.53295	-2.75751	0.0058243	0.0494754
Aifm3	79.8861	-1.4757	0.50648	-2.91364	0.00357246	0.0348883
Il11ra1	2248.52	-1.4774	0.282806	-5.22409	1.75015e-07	8.88299e-06
Prkar2b	930.649	-1.47925	0.398395	-3.71303	0.000204791	0.00385768
Mpped2	61.0747	-1.48047	0.355045	-4.1698	3.04863e-05	0.000810837
Svil	6487.41	-1.4808	0.442759	-3.34448	0.000824381	0.0117405
Ttyh2	1281.94	-1.4845	0.290107	-5.11709	3.10291e-07	1.47647e-05
Aqp5	2066.32	-1.48616	0.521908	-2.84756	0.00440559	0.0405332
Vcan	6892.02	-1.48847	0.487014	-3.05631	0.00224078	0.0247692
Adam11	43.4306	-1.49345	0.523344	-2.85368	0.00432166	0.0400027
Cygb	1428.93	-1.49348	0.45333	-3.29447	0.000986079	0.0134862
Rap1gap	587.62	-1.495	0.494132	-3.02552	0.00248209	0.0266938
Pygo1	269.212	-1.49767	0.455964	-3.28462	0.0010212	0.0137708
Reck	288.087	-1.51106	0.442274	-3.41656	0.00063418	0.0095925
Plekhh1	895.285	-1.5152	0.365685	-4.14346	3.42098e-05	0.000887556
Mxra7	489.669	-1.51578	0.433244	-3.49868	0.00046757	0.00756727
Capsl	241.29	-1.51654	0.406868	-3.72735	0.000193506	0.00369382
Plat	2188.72	-1.51765	0.46707	-3.2493	0.00115688	0.0150239
Zfp40	96.0593	-1.51987	0.520112	-2.9222	0.00347568	0.0341623
Amot	395.826	-1.52182	0.350372	-4.34344	1.40269e-05	0.000422935
Stxbp1	496.761	-1.52363	0.364177	-4.18377	2.86717e-05	0.000772699
Brdt	92.182	-1.52874	0.524644	-2.91386	0.00356996	0.0348825
Gm5124	45.2035	-1.52903	0.489838	-3.12151	0.00179926	0.0210474
Myo5c	1071.96	-1.53172	0.490559	-3.12239	0.00179387	0.0210109
Ggt1	434.163	-1.53327	0.517469	-2.96302	0.00304634	0.0309884
Wnk4	226.425	-1.53747	0.472987	-3.25056	0.00115177	0.0149787
Usp28	454.084	-1.53756	0.29155	-5.27373	1.33679e-07	7.05946e-06
S1pr3	1754.3	-1.54228	0.439943	-3.50563	0.000455524	0.00739852
Coro2b	141.524	-1.54265	0.472214	-3.26684	0.00108756	0.0144417
Cnn3	8332.53	-1.55122	0.329001	-4.71495	2.41774e-06	9.37939e-05
Tvp23a	94.8068	-1.55483	0.488946	-3.17996	0.00147298	0.0181582
Armcx2	953.934	-1.55795	0.42643	-3.65348	0.000258714	0.00465736
Cutal	91.8707	-1.56581	0.471858	-3.31839	0.000905371	0.0125957
Enpp5	938.465	-1.56941	0.463585	-3.38538	0.000710786	0.0103723
Hectd2	394.57	-1.57218	0.36267	-4.33502	1.4575e-05	0.000435867
D3Ertd751e	110.302	-1.57768	0.383277	-4.11629	3.85017e-05	0.000980041
Ccdc162	106.112	-1.58499	0.35778	-4.43007	9.42005e-06	0.000299866
Lurap1	310.429	-1.58701	0.433314	-3.66249	0.000249779	0.00452775
Arsj	118.635	-1.58758	0.483736	-3.28192	0.00103102	0.0138827
Fam131c	69.6554	-1.59309	0.458434	-3.47506	0.000510739	0.00809749
Slc25a23	879.576	-1.59447	0.4456	-3.57825	0.000345906	0.00588492
C1qtnf6	2068.87	-1.59628	0.527654	-3.02525	0.00248428	0.0267017
Ppargc1a	81.9394	-1.59854	0.307175	-5.20401	1.95029e-07	9.79003e-06
Fam13a	401.244	-1.59978	0.509451	-3.14021	0.00168829	0.0201492
Pcdh18	870.952	-1.60623	0.375798	-4.27419	1.91837e-05	0.000552879
Fam69b	236.319	-1.60767	0.449021	-3.5804	0.000343073	0.0058476
Trf	24689.2	-1.60876	0.499187	-3.22277	0.00126958	0.0160427
Cnrip1	94.4081	-1.60944	0.581682	-2.76688	0.00565961	0.0483235
Uggt2	199.717	-1.61423	0.484863	-3.32926	0.000870775	0.0122485
Cdr2l	755.251	-1.61709	0.393045	-4.11426	3.88423e-05	0.000985731
Vill	2409.05	-1.61879	0.404372	-4.00323	6.24842e-05	0.00146561
Colec12	1263.15	-1.61987	0.585068	-2.76869	0.00562821	0.0481229
Zcwpw1	141.483	-1.63071	0.470608	-3.4651	0.000530029	0.00828459
Dact3	243.753	-1.63221	0.551263	-2.96086	0.00306786	0.0311422
Hid1	1063.18	-1.63271	0.533766	-3.05885	0.00222186	0.0246461
St3gal4	2132.22	-1.63776	0.570781	-2.86932	0.00411349	0.0386833
Mras	776.603	-1.6422	0.352872	-4.65381	3.25858e-06	0.000120528
Pxdn	5562.24	-1.64575	0.386867	-4.25403	2.09953e-05	0.000597549
Art3	415.172	-1.64681	0.396443	-4.15397	3.26762e-05	0.000857843
Kank4	817.534	-1.65026	0.573959	-2.87523	0.00403734	0.038223
Fap	319.273	-1.65541	0.583165	-2.83867	0.00453022	0.0413055
Rgl3	185.1	-1.65769	0.54983	-3.01491	0.00257059	0.0273717
Gprc5c	765.376	-1.66237	0.284383	-5.84555	5.04906e-09	3.82899e-07
Triqk	74.5665	-1.66368	0.559104	-2.97562	0.002924	0.0299985
Dchs1	542.659	-1.67324	0.481707	-3.47356	0.000513603	0.0081322
Gulp1	126.768	-1.67533	0.608546	-2.753	0.00590514	0.0499763
4930432K21Rik	27.3186	-1.67926	0.594923	-2.82265	0.00476284	0.0428184
Fkbp10	2454.94	-1.68161	0.606404	-2.77308	0.00555278	0.0476258
Xk	81.0812	-1.68338	0.485633	-3.46636	0.000527552	0.00825294
Tmem200b	296.441	-1.68365	0.43776	-3.84607	0.000120029	0.00248097
Sdk1	478.799	-1.68838	0.537617	-3.14049	0.00168668	0.0201431
Emilin1	2069.06	-1.70044	0.491621	-3.45885	0.000542486	0.00842166
Edil3	409.147	-1.70378	0.405559	-4.20106	2.6567e-05	0.000726798
Mtss1	7114.64	-1.71176	0.524873	-3.26128	0.00110909	0.0146155
Sgce	222.807	-1.71307	0.567234	-3.02004	0.00252739	0.0270536
Map1b	1247.59	-1.71653	0.459808	-3.73314	0.00018911	0.00363345
Grb10	1602.35	-1.71888	0.418066	-4.1115	3.9309e-05	0.000993485
Cep126	153.256	-1.71931	0.556935	-3.08709	0.00202124	0.0230538
Layn	133.011	-1.72109	0.573341	-3.00187	0.0026833	0.0282102
Zfp423	207.276	-1.7279	0.623616	-2.77077	0.00559237	0.0478613
Dclk3	189.087	-1.72995	0.599679	-2.8848	0.00391666	0.0373124
Ccbe1	444.694	-1.735	0.522459	-3.32084	0.000897477	0.0125372
Zfp820	65.7292	-1.73857	0.439418	-3.95652	7.605e-05	0.00171554
Lingo1	101.275	-1.74173	0.545977	-3.19011	0.00142217	0.0176895
Pth1r	176.325	-1.74826	0.568477	-3.07534	0.00210262	0.0237009
Clip3	436.817	-1.74936	0.622643	-2.80957	0.00496077	0.0439382
Sytl4	108.257	-1.75494	0.327945	-5.35133	8.73123e-08	4.87881e-06
Enpp4	691.536	-1.75577	0.330327	-5.31524	1.06516e-07	5.84465e-06
Hist1h2be	52.3953	-1.76382	0.35099	-5.02528	5.02691e-07	2.29999e-05
Maged2	1889.82	-1.76498	0.375338	-4.70237	2.57161e-06	9.85085e-05
Ndp	69.1578	-1.76525	0.517963	-3.40806	0.000654274	0.00979265
Prom1	1174.27	-1.76658	0.599344	-2.94751	0.0032034	0.0321607
BC030870	83.777	-1.76805	0.451398	-3.91683	8.97227e-05	0.0019752
Cmtm8	427.052	-1.77585	0.423459	-4.19367	2.74475e-05	0.000746311
Enho	435.046	-1.7765	0.384073	-4.62544	3.73812e-06	0.000135522
Pcdh10	73.0568	-1.78216	0.510124	-3.49359	0.000476577	0.0076926
Zfp229	114.886	-1.78435	0.412936	-4.32113	1.55235e-05	0.000458974
Abcc8	132.684	-1.78639	0.564694	-3.16347	0.00155903	0.0189751
Megf11	110.172	-1.78927	0.544058	-3.28875	0.00100634	0.0136509
Mttp	179.577	-1.79364	0.38533	-4.65482	3.2427e-06	0.000120207
Piwil4	46.8984	-1.79702	0.596592	-3.01215	0.00259404	0.0274901
Capn5	1381.17	-1.79811	0.493987	-3.63999	0.000272647	0.00487457
Ramp3	75.3029	-1.81275	0.367415	-4.93379	8.06488e-07	3.50027e-05
Mtmr7	784.359	-1.81593	0.456524	-3.97773	6.95757e-05	0.00159709
Sema6c	195.095	-1.82704	0.518559	-3.5233	0.000426217	0.00699715
Fxyd6	497.312	-1.82706	0.557434	-3.27763	0.00104681	0.0140435
Cxxc5	1011.23	-1.82765	0.26805	-6.81834	9.21009e-12	1.24657e-09
Gm18009	25.6565	-1.83238	0.514655	-3.5604	0.000370292	0.00623017
Kcnd1	99.7682	-1.83312	0.516364	-3.55006	0.000385145	0.0064327
Ugt1a6a	829.145	-1.83893	0.284951	-6.45349	1.09302e-10	1.21778e-08
Styk1	70.0673	-1.84373	0.35962	-5.12688	2.94579e-07	1.40537e-05
Zfp773	154.825	-1.84401	0.481212	-3.83202	0.000127096	0.00260639
Aif1l	170.389	-1.84798	0.592743	-3.11768	0.00182281	0.0212413
Upk1b	83.6595	-1.85111	0.672029	-2.75451	0.00587805	0.0498162
Pik3c2g	39.693	-1.85979	0.666364	-2.79095	0.00525532	0.0458792
Lrp3	128.931	-1.862	0.544538	-3.41941	0.000627573	0.00952409
Ccdc160	23.0082	-1.86254	0.591759	-3.14746	0.00164693	0.0198109
Gm16574	14.3298	-1.86625	0.64811	-2.87953	0.00398268	0.037823
Lrrc75b	494.314	-1.868	0.628612	-2.97163	0.00296222	0.0302564
Itga1	881.895	-1.8696	0.49769	-3.75655	0.000172271	0.00334887
Rasef	314.263	-1.87404	0.452315	-4.14323	3.42451e-05	0.000887556
Cdkn2a	2990.34	-1.88206	0.304027	-6.19043	5.99989e-10	5.4815e-08
Ptger3	76.814	-1.89384	0.545402	-3.47237	0.000515882	0.00814711
Dbn1	1389.29	-1.89457	0.547925	-3.45771	0.000544786	0.0084502
Armc2	30.9291	-1.89467	0.61997	-3.05607	0.00224261	0.0247744
Il17d	81.342	-1.8993	0.4785	-3.96928	7.20898e-05	0.00164794
Btc	194.369	-1.91076	0.470248	-4.06332	4.83805e-05	0.00118481
Fam174b	310.325	-1.91082	0.585165	-3.26544	0.00109292	0.0144919
Lalba	90.0583	-1.9152	0.606559	-3.15748	0.00159138	0.0192695
Col9a2	2273.15	-1.91548	0.610252	-3.13884	0.00169619	0.0202302
Igsf10	1981.29	-1.91562	0.561625	-3.41086	0.000647588	0.00973026
Itga8	886.507	-1.91571	0.411175	-4.65911	3.17583e-06	0.000118185
Gnaz	111.427	-1.91779	0.478972	-4.00396	6.22899e-05	0.00146293
Gpx3	3447.84	-1.92065	0.576587	-3.33106	0.000865148	0.0122034
Trpm3	350.559	-1.92706	0.694133	-2.77622	0.00549954	0.0472661
Csdc2	282.424	-1.92894	0.518413	-3.72086	0.000198546	0.0037633
Armcx4	657.618	-1.92923	0.43793	-4.40533	1.05623e-05	0.000332176
Slc27a6	127.852	-1.93717	0.548953	-3.52884	0.000417381	0.00687681
Olfr1023	95.6368	-1.94926	0.670308	-2.908	0.00363747	0.0353531
9130230L23Rik	145.822	-1.95026	0.520728	-3.74525	0.000180212	0.00348448
Angpt2	266.897	-1.95244	0.474875	-4.11149	3.93109e-05	0.000993485
Nnmt	190.75	-1.95599	0.699373	-2.79678	0.00516153	0.0453638
Islr	1202.08	-1.96222	0.628133	-3.12389	0.00178474	0.0209851
Arhgap40	371	-1.96972	0.498524	-3.9511	7.77918e-05	0.00175051
Spdef	226.627	-1.97268	0.520612	-3.78915	0.000151162	0.00301286
Cdk18	1768.54	-1.97968	0.374052	-5.29252	1.20642e-07	6.4644e-06
Ccdc80	4247.96	-1.98515	0.485365	-4.09	4.31369e-05	0.00107384
Plch1	41.0236	-1.99123	0.541907	-3.67449	0.000238321	0.0043677
Nid1	5743.75	-1.99989	0.536576	-3.72714	0.000193667	0.00369382
Tbc1d16	646.546	-2.00197	0.279323	-7.1672	7.65445e-13	1.23772e-10
Sgsm1	182.054	-2.00597	0.417063	-4.80975	1.51116e-06	6.17714e-05
Pdgfra	1625.08	-2.00914	0.580625	-3.4603	0.000539577	0.00839791
Ptprd	275.973	-2.01563	0.442323	-4.55692	5.19088e-06	0.000180319
Loxl1	1676.18	-2.0177	0.63862	-3.15948	0.00158053	0.0191831
Tead2	1520.57	-2.02214	0.271379	-7.45133	9.24065e-14	1.87606e-11
Peg3	943.093	-2.028	0.344954	-5.87905	4.12625e-09	3.19738e-07
Stc2	3882.94	-2.03543	0.425704	-4.78133	1.7414e-06	7.05516e-05
Arhgef9	149.528	-2.04005	0.485415	-4.20268	2.63769e-05	0.000723662
Sardh	489.046	-2.04571	0.468046	-4.37075	1.23818e-05	0.000380236
Adgrg3	299.178	-2.04576	0.524141	-3.90308	9.49782e-05	0.00206109
Nptxr	136.216	-2.04625	0.523062	-3.91206	9.15119e-05	0.00200733
Olfml2a	2746.1	-2.04717	0.546181	-3.74816	0.000178139	0.00344804
Nhsl2	326.659	-2.05364	0.527192	-3.89543	9.80244e-05	0.00210223
Fads6	192.042	-2.05943	0.311911	-6.60261	4.0397e-11	4.79308e-09
Adgra2	1064.8	-2.05944	0.542411	-3.79683	0.000146558	0.00293953
Rbp4	79.1311	-2.06044	0.66442	-3.10111	0.00192794	0.0221416
Loxl3	1340.55	-2.06315	0.519805	-3.96908	7.21513e-05	0.00164794
Hs3st6	492.848	-2.06784	0.374184	-5.52626	3.27137e-08	2.04009e-06
Dnm1	950.752	-2.07264	0.534679	-3.87642	0.000106007	0.00223925
Kcnk16	144.913	-2.08183	0.576365	-3.612	0.000303844	0.00533318
Slc12a2	17133.9	-2.0979	0.569496	-3.68379	0.00022979	0.00423686
Gm960	18.5352	-2.11452	0.754365	-2.80305	0.00506225	0.0446416
Garnl3	234.357	-2.11762	0.51813	-4.08704	4.36907e-05	0.00108614
Cacna1b	50.0824	-2.12248	0.664031	-3.19636	0.00139174	0.0173583
Slc23a1	103.654	-2.12867	0.508231	-4.18839	2.80945e-05	0.000759384
Lum	2919.7	-2.12947	0.62919	-3.38446	0.000713194	0.0103919
Rflna	397.412	-2.13178	0.627516	-3.39717	0.000680861	0.0100574
Cntn1	122.068	-2.13517	0.643387	-3.31864	0.000904574	0.0125957
Col5a3	5955.66	-2.1547	0.64838	-3.32322	0.000889863	0.0124499
Ugt8a	77.4136	-2.15852	0.478139	-4.51441	6.34932e-06	0.00021405
Gjc1	220.848	-2.17432	0.546614	-3.9778	6.95554e-05	0.00159709
Stat5a	3127.4	-2.1814	0.358968	-6.07685	1.22568e-09	1.07178e-07
Me1	4178.27	-2.1821	0.603984	-3.61285	0.000302853	0.00532602
Esr1	819.512	-2.18596	0.497336	-4.39534	1.10601e-05	0.000345453
Larp6	94.3465	-2.18835	0.631169	-3.46713	0.000526041	0.00825294
Krt19	29887.8	-2.19029	0.39355	-5.56547	2.6145e-08	1.67622e-06
Sox12	359.018	-2.19133	0.316214	-6.92989	4.21181e-12	6.0597e-10
Lix1	51.2376	-2.19282	0.573811	-3.8215	0.000132642	0.00270796
Amy1	24.5212	-2.19934	0.667751	-3.29366	0.00098892	0.0134886
Apof	44.6199	-2.20244	0.699705	-3.14767	0.00164577	0.0198099
Zeb1	546.707	-2.21436	0.572007	-3.8712	0.000108299	0.00228503
Jam3	185.711	-2.21578	0.670708	-3.30365	0.000954356	0.0131508
Cped1	377.001	-2.21631	0.496321	-4.46548	7.9891e-06	0.000261139
Atp1b1	3246.48	-2.22249	0.626021	-3.55018	0.000384973	0.0064327
Gipc2	823.701	-2.22555	0.467889	-4.75657	1.96912e-06	7.80474e-05
Syn2	280.09	-2.22716	0.581377	-3.83084	0.000127708	0.00261601
Enpep	129.76	-2.23779	0.679569	-3.29295	0.000991428	0.0134988
Twist1	462.999	-2.23794	0.712356	-3.14161	0.00168023	0.0200793
Pcdh12	257.854	-2.25182	0.604802	-3.72323	0.000196686	0.00373581
Crispld2	4320.86	-2.26506	0.43151	-5.24914	1.52813e-07	7.86535e-06
Prkg2	393.699	-2.27592	0.735637	-3.09381	0.00197603	0.0225945
Ednra	1522.94	-2.28035	0.403697	-5.64866	1.61699e-08	1.07431e-06
Itga2b	217.956	-2.28586	0.349253	-6.54499	5.95008e-11	6.795e-09
Slc16a5	25.2882	-2.2866	0.553057	-4.13448	3.55759e-05	0.000918141
Cldn10	354.337	-2.29523	0.484801	-4.73437	2.19733e-06	8.63432e-05
Naalad2	161.061	-2.30902	0.756911	-3.05058	0.002284	0.0251102
Sbp	103.358	-2.31417	0.764636	-3.0265	0.00247406	0.0266388
Thsd4	909.16	-2.32325	0.706205	-3.28976	0.00100272	0.0136221
Col6a3	32401.1	-2.32347	0.68504	-3.39173	0.000694529	0.0101768
Cxcl15	255.024	-2.33655	0.845788	-2.76257	0.00573481	0.0488515
Mlph	4587.31	-2.33953	0.618791	-3.78081	0.000156317	0.00310614
Cilp	825.361	-2.34581	0.685469	-3.42219	0.000621183	0.00944666
Chst1	322.903	-2.34793	0.502072	-4.67648	2.91838e-06	0.000110175
Mageh1	193.088	-2.3509	0.470741	-4.99405	5.91254e-07	2.64142e-05
Pls1	270.013	-2.35619	0.45839	-5.14015	2.74526e-07	1.32352e-05
Foxa1	2892.36	-2.35734	0.577331	-4.08318	4.44238e-05	0.00110287
Adamts12	1481.59	-2.35859	0.722659	-3.26377	0.0010994	0.0145461
Ndnf	109.461	-2.36652	0.462728	-5.11428	3.14945e-07	1.48316e-05
Adam28	113.044	-2.36859	0.791841	-2.99125	0.0027784	0.0288941
Rarres1	131.119	-2.38863	0.452415	-5.27973	1.29375e-07	6.85199e-06
Prlr	4346.34	-2.38971	0.496672	-4.81145	1.49842e-06	6.13881e-05
Tmem229a	97.7302	-2.39131	0.434201	-5.50738	3.64217e-08	2.2483e-06
Tox	82.6341	-2.39572	0.66771	-3.58796	0.00033327	0.00571785
F2r	791.496	-2.40389	0.431836	-5.56666	2.5967e-08	1.67067e-06
Dlx1	170.056	-2.40783	0.833001	-2.89055	0.00384563	0.0368751
Rbp7	147.066	-2.40811	0.495421	-4.86073	1.16955e-06	4.90137e-05
Ngfr	482.731	-2.40907	0.435899	-5.52666	3.2638e-08	2.04009e-06
Osbpl6	186.05	-2.41216	0.785084	-3.07248	0.00212287	0.0238864
Colca2	153.599	-2.4184	0.617753	-3.91482	9.04702e-05	0.00198686
Mum1l1	941.482	-2.42224	0.675294	-3.58694	0.000334587	0.00572674
Wfdc3	258.741	-2.42462	0.804344	-3.01441	0.00257481	0.0273916
Dpysl3	2138.34	-2.4271	0.514228	-4.71989	2.35977e-06	9.25273e-05
Abca8a	141.261	-2.42843	0.724244	-3.35305	0.000799262	0.0114542
Chsy3	327.466	-2.43668	0.559367	-4.35614	1.32377e-05	0.000403806
Hspa12a	181.808	-2.43921	0.610386	-3.99618	6.43717e-05	0.00150026
Col11a1	5271.6	-2.4594	0.56322	-4.36668	1.26151e-05	0.000386102
D630003M21Rik	236.852	-2.46184	0.589841	-4.17374	2.99634e-05	0.000800466
Scml4	751.411	-2.46798	0.523041	-4.71852	2.37571e-06	9.27606e-05
Cited1	2169.29	-2.47146	0.578337	-4.27338	1.92528e-05	0.000553995
Dennd2a	861.772	-2.47665	0.474852	-5.21562	1.83208e-07	9.27305e-06
Qprt	25.779	-2.47831	0.736525	-3.36487	0.000765801	0.0110353
Tesc	56.108	-2.47885	0.461357	-5.37295	7.74579e-08	4.39538e-06
Pde10a	99.1567	-2.48449	0.622756	-3.98951	6.62112e-05	0.00153724
Gm11627	30.6018	-2.48779	0.803878	-3.09473	0.0019699	0.0225526
Heyl	565.65	-2.48936	0.591199	-4.21071	2.54573e-05	0.000701594
Col4a2	20931.3	-2.49879	0.651124	-3.83766	0.000124211	0.00255584
Gucy1a1	122.319	-2.50568	0.714722	-3.50581	0.000455224	0.00739852
Thy1	4791.34	-2.51408	0.622066	-4.0415	5.311e-05	0.00128025
Klhl13	255.81	-2.51556	0.652404	-3.85584	0.000115333	0.00240876
Ebf1	420.183	-2.51974	0.736305	-3.42214	0.000621301	0.00944666
Mdk	927.141	-2.52145	0.625716	-4.0297	5.58487e-05	0.0013392
Filip1	174.677	-2.52311	0.751984	-3.35528	0.00079286	0.0113803
Pabpc4l	57.07	-2.52369	0.715862	-3.52538	0.000422873	0.00694851
Spa17	46.0268	-2.54327	0.517388	-4.91559	8.85154e-07	3.82353e-05
Lat	65.0493	-2.54465	0.577753	-4.40439	1.06081e-05	0.000333042
Gm16485	222.299	-2.54964	0.612051	-4.16573	3.10357e-05	0.000823053
Abca5	401.443	-2.558	0.382186	-6.69308	2.18516e-11	2.75361e-09
R3hdml	896.896	-2.55849	0.704894	-3.62961	0.000283854	0.00506008
Nckap5	266.632	-2.56823	0.617956	-4.156	3.23867e-05	0.000852694
Rpl39l	142.712	-2.57031	0.512726	-5.01303	5.35803e-07	2.43537e-05
Coro6	156.312	-2.57427	0.809668	-3.17941	0.00147575	0.0181582
Ripor3	222.096	-2.57952	0.473131	-5.45202	4.97998e-08	2.96398e-06
Flnc	810.501	-2.57981	0.531986	-4.84939	1.23843e-06	5.14287e-05
Rassf6	444.478	-2.59088	0.314918	-8.22716	1.91704e-16	6.12491e-14
Cdo1	2003.68	-2.59287	0.342705	-7.56591	3.85168e-14	9.02281e-12
Frzb	55.0572	-2.60496	0.80799	-3.224	0.00126415	0.0160294
Twist2	139.95	-2.61163	0.902519	-2.89371	0.00380716	0.0366268
Abcd2	188.337	-2.62858	0.688725	-3.81659	0.000135308	0.00274319
Hpca	47.3182	-2.62862	0.585637	-4.48848	7.17328e-06	0.000238652
Rtn1	178.164	-2.63024	0.843918	-3.1167	0.00182886	0.0212847
Col4a1	33417.2	-2.63549	0.618404	-4.26176	2.02826e-05	0.000579973
Add2	116.065	-2.63641	0.627002	-4.20478	2.61332e-05	0.000718053
Eln	3094.69	-2.65039	0.509557	-5.20136	1.97837e-07	9.84982e-06
Heph	287.585	-2.65606	0.569422	-4.66448	3.09394e-06	0.000116083
Hic1	549.816	-2.65752	0.557787	-4.76439	1.89425e-06	7.57368e-05
Adra1a	70.9978	-2.66371	0.924284	-2.88191	0.00395267	0.0375771
Ptprn	170.267	-2.67208	0.77084	-3.46645	0.000527382	0.00825294
Hoxc9	88.2884	-2.67348	0.562249	-4.75498	1.98464e-06	7.84922e-05
Zbtb16	77.4763	-2.67542	0.783184	-3.41608	0.000635303	0.00960154
Slc35f3	139.819	-2.678	0.666021	-4.02089	5.79793e-05	0.00137406
Mfap2	1198.56	-2.70616	0.60562	-4.46841	7.88037e-06	0.000258975
Arhgap20	82.5788	-2.7317	0.967808	-2.82257	0.00476411	0.0428184
Rbm24	60.1968	-2.73764	0.495763	-5.52207	3.35025e-08	2.08217e-06
Lbhd2	191.301	-2.73955	0.812654	-3.37111	0.000748664	0.0108225
Adcy5	187.812	-2.74756	0.502369	-5.46921	4.52044e-08	2.72599e-06
Peg12	66.5071	-2.76327	0.519403	-5.3201	1.03713e-07	5.70795e-06
Pear1	721.04	-2.76689	0.607365	-4.55557	5.22447e-06	0.000181141
Dpyd	140.746	-2.77075	0.69296	-3.99842	6.37671e-05	0.00148996
Six1	80.6229	-2.77155	0.997752	-2.77779	0.00547298	0.0471264
Fbp1	1481.17	-2.79484	0.508666	-5.49445	3.91935e-08	2.39978e-06
Zbtb46	266.175	-2.79863	0.380995	-7.34556	2.04894e-13	3.94086e-11
Grb14	849.214	-2.80041	0.43695	-6.40899	1.46486e-10	1.59321e-08
Tub	70.8844	-2.8005	0.84552	-3.31217	0.000925763	0.012844
Radil	109.607	-2.80088	0.795063	-3.52284	0.000426947	0.00700285
Kcnh2	37.0372	-2.82044	0.919408	-3.06767	0.00215737	0.0241837
Gm1673	36.1398	-2.83026	0.725509	-3.90106	9.57705e-05	0.00206846
Fez1	177.696	-2.85644	0.475742	-6.00417	1.92312e-09	1.60453e-07
Kcp	298.262	-2.86002	0.677359	-4.22231	2.4181e-05	0.00067353
Pgr	1374.37	-2.86328	0.600211	-4.77045	1.83813e-06	7.39161e-05
Smarca1	112.46	-2.86535	0.505567	-5.66759	1.4482e-08	9.87373e-07
6330403K07Rik	48.1384	-2.87077	1.01049	-2.84098	0.00449753	0.04111
Spry4	735.435	-2.87166	0.508433	-5.64805	1.62276e-08	1.07431e-06
Srpx	941.308	-2.87304	0.666643	-4.30971	1.6347e-05	0.000479275
Adamts18	262.325	-2.88362	0.851134	-3.38797	0.000704122	0.0103008
Spink10	12.7741	-2.88463	0.987606	-2.92083	0.00349103	0.0342578
Dnaic2	39.0918	-2.8848	0.649626	-4.44071	8.96642e-06	0.000286925
Tmem56	1956.95	-2.88948	0.506876	-5.70057	1.1941e-08	8.32769e-07
Hc	279.715	-2.89833	0.45676	-6.34541	2.21834e-10	2.23942e-08
Gm30191	37.8602	-2.89987	0.854883	-3.39213	0.000693519	0.0101701
Cdkn1c	558.599	-2.90749	0.706625	-4.11462	3.87821e-05	0.000985573
Mrc2	4109.47	-2.9097	0.5981	-4.8649	1.14515e-06	4.82123e-05
Nr2f1	156.703	-2.9199	0.713123	-4.09452	4.23045e-05	0.00105714
Rasgrf1	329.536	-2.93144	0.863328	-3.39551	0.000685016	0.0100859
Itih5	2546.85	-2.94043	0.334638	-8.78688	1.53765e-18	7.20407e-16
Sv2c	228.937	-2.94155	0.52259	-5.62879	1.81479e-08	1.1928e-06
Hoxc10	101.665	-2.95219	0.719408	-4.10364	4.06695e-05	0.00102357
Rbm20	225.995	-2.96699	0.658624	-4.50484	6.64233e-06	0.000222695
Sema7a	1650.53	-2.97137	0.717014	-4.14409	3.4116e-05	0.000886724
Ccdc170	79.7497	-2.98694	0.786973	-3.79548	0.00014736	0.00295084
Acsbg1	1545.6	-3.00241	0.705079	-4.25827	2.06016e-05	0.000588175
Htra4	124.382	-3.00277	0.903386	-3.32391	0.000887645	0.0124317
Shox2	308.493	-3.00778	0.739614	-4.06669	4.7685e-05	0.00116953
Gm12978	10.0255	-3.01566	0.843806	-3.57387	0.000351738	0.005973
Fbp2	274.767	-3.01969	0.700716	-4.30943	1.63675e-05	0.000479275
Pdgfrb	5295.64	-3.02127	0.640739	-4.7153	2.41356e-06	9.37939e-05
Bmpr1b	128.871	-3.02466	0.829461	-3.64654	0.000265794	0.00476604
Gm32742	147.041	-3.03148	0.73915	-4.10131	4.10817e-05	0.0010311
Kcnk2	90.7189	-3.05483	0.591752	-5.16234	2.43883e-07	1.20114e-05
Meox1	638.177	-3.05672	0.724756	-4.21759	2.46932e-05	0.000684293
Col26a1	1063.86	-3.06764	0.589675	-5.20226	1.96882e-07	9.82905e-06
Crym	380.222	-3.06785	0.754215	-4.06761	4.74986e-05	0.00116652
Ptgis	134.065	-3.07165	0.718637	-4.27427	1.91765e-05	0.000552879
Pnmal2	86.3692	-3.08209	0.730841	-4.21718	2.47378e-05	0.000684293
Nes	1710.22	-3.11108	0.47098	-6.60554	3.96071e-11	4.73007e-09
Meox2	170.714	-3.12351	0.753517	-4.14524	3.39457e-05	0.000886079
Gm715	21.4897	-3.13655	0.9002	-3.48428	0.000493456	0.00789939
Gria3	290.676	-3.1616	0.684727	-4.61731	3.88737e-06	0.000139002
Ebf2	200.009	-3.16259	0.728386	-4.34192	1.41245e-05	0.000425177
Fmo2	970.571	-3.1817	0.639754	-4.97333	6.58128e-07	2.91877e-05
Fxyd2	856.977	-3.18399	0.594445	-5.35624	8.49717e-08	4.77724e-06
Proc	152.088	-3.18813	0.594696	-5.36094	8.27904e-08	4.66897e-06
Gcnt4	494.791	-3.20761	0.531567	-6.03425	1.59708e-09	1.36363e-07
Cyp3a57	427.186	-3.21271	0.920428	-3.49045	0.000482215	0.00776303
F3	4013.79	-3.22838	0.586592	-5.50363	3.72055e-08	2.28895e-06
Amn	269.997	-3.23549	0.55907	-5.78726	7.1543e-09	5.18744e-07
Capn6	1424.7	-3.24985	0.706324	-4.60107	4.2032e-06	0.000147978
Reln	462.315	-3.26012	0.840305	-3.87968	0.000104592	0.00221193
Unc5c	288.462	-3.29275	0.530231	-6.21002	5.29778e-10	4.86437e-08
Fam131b	68.8118	-3.29805	0.743854	-4.43373	9.26158e-06	0.000295336
Kcnab1	48.5756	-3.31635	1.06992	-3.09963	0.00193764	0.022225
1700003F12Rik	13.2924	-3.3205	1.12927	-2.94039	0.00327802	0.0327122
Wdr63	53.5033	-3.34394	0.735241	-4.54808	5.41364e-06	0.000186286
Foxs1	189.443	-3.3678	0.587792	-5.72958	1.00679e-08	7.158e-07
Areg	2904.76	-3.36858	0.529071	-6.36698	1.92792e-10	2.01297e-08
Daam2	472.719	-3.37405	0.410195	-8.22547	1.9442e-16	6.12491e-14
Msx1	1194.3	-3.45228	0.574382	-6.01042	1.85045e-09	1.55098e-07
Rspo1	195.35	-3.46076	0.571153	-6.05926	1.36746e-09	1.17306e-07
Bche	60.9668	-3.46131	0.503047	-6.88068	5.95665e-12	8.30838e-10
Ttc6	837.289	-3.46915	0.727181	-4.77069	1.83599e-06	7.39161e-05
Cap2	239.118	-3.49548	0.683388	-5.11493	3.13865e-07	1.4819e-05
Morc1	64.8631	-3.50153	0.501064	-6.98819	2.78461e-12	4.13661e-10
Nrk	253.043	-3.51939	0.493787	-7.12735	1.02323e-12	1.64004e-10
Plk5	28.943	-3.53408	0.898784	-3.93207	8.42171e-05	0.0018766
P2rx3	34.8003	-3.55428	0.513715	-6.91879	4.5551e-12	6.50241e-10
Shc4	278.681	-3.56097	0.601051	-5.92458	3.1309e-09	2.47653e-07
Fbln7	717.413	-3.60545	0.621918	-5.7973	6.73895e-09	4.94515e-07
Pou2af1	447.84	-3.64845	0.680304	-5.36297	8.18655e-08	4.6311e-06
Dync1i1	138.619	-3.67463	0.796749	-4.61202	3.98766e-06	0.00014148
Crabp1	1575.87	-3.69032	0.601899	-6.13113	8.72597e-10	7.89311e-08
Enpp6	47.5557	-3.71689	1.1915	-3.11952	0.00181146	0.0211436
Gucy1b1	174.027	-3.72567	0.848283	-4.39202	1.12304e-05	0.000349579
Pde11a	303.054	-3.73202	0.837433	-4.45651	8.33062e-06	0.000270368
Col15a1	9927.03	-3.73231	0.586282	-6.36606	1.93949e-10	2.01355e-08
9230104L09Rik	35.8954	-3.73362	0.991456	-3.76579	0.000166023	0.00324447
Atp1a2	800.516	-3.73681	0.56381	-6.62777	3.40788e-11	4.12376e-09
Tslp	421.447	-3.76332	0.950409	-3.95969	7.50481e-05	0.00169922
Pcp4	497.063	-3.76724	0.872222	-4.31913	1.56648e-05	0.000461657
Prrx2	630.251	-3.77857	0.533129	-7.08754	1.36519e-12	2.15041e-10
Prr32	18.2546	-3.80258	1.34896	-2.8189	0.00481888	0.0430987
Tril	1728	-3.82587	0.629584	-6.07681	1.22593e-09	1.07178e-07
6030408B16Rik	72.569	-3.84242	0.547353	-7.02001	2.21851e-12	3.32267e-10
a	43.7391	-3.91555	0.978578	-4.00126	6.30051e-05	0.00147594
Unc5a	270.278	-3.92823	0.479649	-8.1898	2.61669e-16	8.10376e-14
Tro	225.788	-3.99806	0.879752	-4.54453	5.50585e-06	0.000188748
P2rx2	71.4433	-4.01051	1.06709	-3.75837	0.000171021	0.00333144
Fsd1	22.1095	-4.02922	1.27373	-3.16332	0.0015598	0.0189751
Adcyap1r1	182.777	-4.03501	0.736388	-5.47946	4.26629e-08	2.59845e-06
Peg10	398.46	-4.03749	0.536606	-7.52413	5.30712e-14	1.18258e-11
Wdr86	180.073	-4.03935	0.5791	-6.97522	3.05394e-12	4.50012e-10
Lama2	2807.22	-4.05799	0.681714	-5.95263	2.63868e-09	2.11464e-07
Alx4	1354.69	-4.06998	0.697548	-5.83469	5.38897e-09	4.05215e-07
Dcaf12l1	59.2872	-4.10147	0.657199	-6.24083	4.35245e-10	4.01656e-08
Itih2	1796.69	-4.1663	0.738855	-5.63885	1.71189e-08	1.12923e-06
Psd2	67.0357	-4.17211	0.994526	-4.19508	2.72778e-05	0.000742801
Igf2	1139.34	-4.20996	0.793247	-5.30724	1.11296e-07	6.07047e-06
Sh3gl3	36.3149	-4.22993	0.864208	-4.89458	9.85179e-07	4.21573e-05
Gm13193	5.16295	-4.24291	1.30955	-3.23998	0.00119539	0.0153805
Cckar	62.4219	-4.24425	1.2465	-3.40493	0.000661817	0.00986356
Mmp16	231.96	-4.24865	0.726909	-5.84482	5.07123e-09	3.82899e-07
Ndst4	106.876	-4.25218	0.791392	-5.37304	7.74196e-08	4.39538e-06
Odam	21.7119	-4.26154	1.11765	-3.81295	0.000137321	0.00276945
Chn1	355.883	-4.31306	0.600748	-7.17949	6.99714e-13	1.14153e-10
Nptx2	290.13	-4.37002	0.585153	-7.46817	8.1316e-14	1.66945e-11
Tnmd	633.226	-4.39501	1.30437	-3.36944	0.000753215	0.0108796
Egflam	1166.06	-4.4231	0.59503	-7.4334	1.05842e-13	2.10212e-11
Jsrp1	28.6406	-4.43854	0.729642	-6.08317	1.17827e-09	1.05536e-07
Lrrn2	315.388	-4.50729	0.612465	-7.35927	1.84924e-13	3.59461e-11
Sox2	39.4864	-4.52976	1.20141	-3.77037	0.000163003	0.0031957
4930452B06Rik	98.6416	-4.54114	0.872548	-5.20446	1.94561e-07	9.79003e-06
Gm10226	4.69744	-4.54873	1.44934	-3.13848	0.00169826	0.0202418
Synpr	78.5045	-4.6756	1.06003	-4.4108	1.02987e-05	0.00032503
Frem1	1532.35	-4.73894	0.530112	-8.93951	3.90899e-19	1.98403e-16
Crispld1	627.372	-4.75735	0.646044	-7.36381	1.78728e-13	3.51153e-11
Rem1	130.56	-4.81157	0.616494	-7.80473	5.96282e-15	1.55647e-12
Kcng1	173.241	-4.82441	0.866982	-5.5646	2.6275e-08	1.67866e-06
Kera	601.707	-4.93358	0.91452	-5.39473	6.86277e-08	3.96825e-06
Hapln1	90.6959	-4.99387	0.833379	-5.99232	2.06872e-09	1.69505e-07
Klrb1a	82.0619	-5.02645	0.699563	-7.18512	6.71466e-13	1.10532e-10
Dcdc2a	304.061	-5.0509	0.573346	-8.80951	1.25691e-18	6.04376e-16
Dcpp1	121.674	-5.08999	1.19636	-4.25458	2.09445e-05	0.000597032
Kcnd3	96.5101	-5.11614	0.782027	-6.54215	6.06388e-11	6.88194e-09
Dcpp3	795.813	-5.1988	1.0132	-5.13109	2.88068e-07	1.38151e-05
Col13a1	599.527	-5.26367	0.530508	-9.92194	3.34194e-23	2.90781e-20
Inmt	18.7577	-5.32284	1.12989	-4.71095	2.4657e-06	9.52499e-05
Snap25	223.052	-5.45081	1.0261	-5.31217	1.08328e-07	5.92628e-06
Esrrb	75.6176	-5.49419	1.00293	-5.47816	4.2978e-08	2.60895e-06
Gm15079	4.21981	-5.76309	2.05257	-2.80775	0.00498889	0.0441438
En2	86.4032	-5.99642	1.83388	-3.2698	0.00107624	0.0143331
Astn2	290.87	-6.25106	0.585197	-10.682	1.23612e-26	2.50961e-23
Emilin3	572.226	-6.33148	0.944375	-6.70441	2.02216e-11	2.58384e-09
Lamc3	1628.99	-6.41222	0.861043	-7.44704	9.54588e-14	1.91673e-11
Pyy	196.321	-6.50469	1.49398	-4.35395	1.33709e-05	0.000407188
Dlk1	238.578	-6.66569	0.949125	-7.02299	2.17176e-12	3.27953e-10
Dppa2	94.9936	-6.75451	0.78951	-8.55532	1.17544e-17	4.38318e-15
Apela	17.6713	-6.87315	1.21182	-5.67175	1.41344e-08	9.70919e-07
Chrm2	171.047	-6.95446	0.792595	-8.77429	1.71979e-18	7.85601e-16
Nrgn	122.396	-7.04489	0.992903	-7.09524	1.29123e-12	2.05159e-10
Fgf3	36.7201	-7.21596	1.52358	-4.73619	2.17777e-06	8.5759e-05
Tpsb2	75.4506	-8.25771	1.31229	-6.29259	3.12205e-10	2.98671e-08
Mcpt4	87.5208	-8.39436	1.31216	-6.39738	1.58069e-10	1.68903e-08
Efcab6	58.0145	-8.54835	1.20997	-7.06495	1.60672e-12	2.50922e-10
Tpsab1	48.9707	-9.02478	2.38805	-3.77915	0.000157367	0.00312204
Agtr2	146.996	-9.20041	1.06344	-8.65158	5.07892e-18	2.06227e-15
Pdyn	101.315	-9.38007	1.29611	-7.23709	4.58424e-13	7.82835e-11
Cpa3	68.9332	-9.51831	1.4757	-6.45002	1.11839e-10	1.2385e-08
Cma1	79.6019	-9.72576	1.34622	-7.22448	5.03029e-13	8.51051e-11
Epyc	511.963	-10.0597	0.903989	-11.1281	9.15475e-29	2.38965e-25

## Sheet: DEGs (sgMettl14 vs sgSHL)
gene	baseMean	log2FoldChange	lfcSE	stat	pvalue	padj
Serpinb9f	35.6815	8.62713	1.0816	7.97626	1.50837e-15	2.4223e-13
Cyp2a5	56.5788	8.35552	1.08261	7.71796	1.18209e-14	1.54679e-12
Adgrg7	317.415	7.87288	0.625981	12.5769	2.83088e-36	8.33458e-33
Scgb1a1	14.9279	7.3719	1.26098	5.84615	5.03081e-09	2.06673e-07
Gm18787	11.6596	7.00983	1.20574	5.81369	6.11093e-09	2.47024e-07
Brinp3	560.39	6.70236	1.42385	4.70721	2.51135e-06	4.93471e-05
Sptssb	235.736	6.57696	0.57682	11.4021	4.08146e-30	3.79468e-27
Skint6	89.3012	6.35019	1.47405	4.30798	1.64753e-05	0.000247059
Il1f8	20.087	6.33645	1.19303	5.31124	1.0888e-07	3.12742e-06
Rnase2b	497.98	6.06565	1.06175	5.71291	1.11062e-08	4.28143e-07
Vit	249.323	5.92128	0.709478	8.34597	7.06288e-17	1.41779e-14
Sprr2b	13.0008	5.70631	1.18887	4.79976	1.58858e-06	3.32886e-05
AC133103.3	4.58401	5.661	1.42614	3.96946	7.20342e-05	0.000842359
Gp2	60.5151	5.6592	1.06141	5.33177	9.72624e-08	2.8446e-06
Fcrlb	22.7058	5.50554	0.827561	6.65273	2.87714e-11	2.02489e-09
AC125149.1	16.1945	5.47839	1.12034	4.88993	1.00874e-06	2.23301e-05
Sprr2d	1275.45	5.37389	1.00836	5.32931	9.85852e-08	2.86904e-06
Krtap3-2	81.6659	5.29451	0.875591	6.04679	1.47758e-09	6.96039e-08
Serpina3c	61.0942	5.15162	0.887799	5.80269	6.52603e-09	2.62602e-07
Ankk1	212.982	5.11418	1.55792	3.2827	0.00102819	0.00745303
Wfdc5	1111.3	5.01794	0.571128	8.78602	1.54953e-18	3.80172e-16
Bpifa1	819.591	4.92638	0.499837	9.85598	6.45832e-23	3.00227e-20
Gm6557	75.4434	4.75689	0.719152	6.61458	3.72598e-11	2.55114e-09
Myoc	83.6942	4.68564	1.03432	4.53015	5.8942e-06	0.00010309
Rnf183	64.9255	4.62937	0.717321	6.45369	1.09158e-10	6.74223e-09
Ifit1bl1	1050.33	4.6204	0.505861	9.13373	6.61771e-20	2.01555e-17
Serpinb3a	330.839	4.59171	1.32703	3.46015	0.000539878	0.0044586
Sfrp4	134.189	4.58509	0.733964	6.24702	4.18345e-10	2.25996e-08
Gsdma	962.259	4.50647	0.600527	7.50419	6.18106e-14	7.32808e-12
Mkrn2os	40.6147	4.45062	0.569199	7.81909	5.32076e-15	7.45962e-13
Rec8	91.7409	4.36931	1.01687	4.29681	1.73275e-05	0.000257639
Crct1	37.8172	4.32448	0.822077	5.26043	1.43716e-07	3.9606e-06
Sprr2g	217.806	4.26085	1.33977	3.18029	0.0014713	0.00992383
Reg3g	187.064	4.24466	0.612708	6.92771	4.27712e-12	3.66774e-10
Ly6g6c	700.702	4.2073	0.283062	14.8635	5.68684e-50	5.02291e-46
Tmem178	93.5668	4.1982	0.739762	5.67507	1.38632e-08	5.18064e-07
Gm11517	29.704	4.15818	0.544517	7.63645	2.23291e-14	2.87915e-12
Gstp3	27.9486	4.15002	0.646726	6.41697	1.39016e-10	8.40999e-09
Lmod2	36.6805	4.14532	0.727659	5.69679	1.22086e-08	4.64797e-07
Tff1	10.7043	4.11736	1.02882	4.002	6.28091e-05	0.000756028
Gm5905	34.2284	4.03165	0.71732	5.62044	1.90475e-08	6.9376e-07
Ccr4	35.0621	3.97492	0.713328	5.57235	2.51324e-08	8.86154e-07
Oit1	346.312	3.96545	0.668689	5.93018	3.02609e-09	1.31665e-07
Pigr	6158.29	3.9531	0.34979	11.3014	1.29207e-29	1.14122e-26
Fut2	148.343	3.94175	0.575451	6.84984	7.39328e-12	5.88299e-10
Prss32	108.695	3.93313	0.459168	8.56578	1.0735e-17	2.37042e-15
Ugt1a1	69.2061	3.91767	1.00237	3.90841	9.2907e-05	0.00103742
Klk12	17.0491	3.91332	0.910787	4.29663	1.73412e-05	0.000257639
Gm13238	35.9148	3.90447	0.956859	4.0805	4.49384e-05	0.000572754
Gphb5	85.5009	3.89621	0.526882	7.39486	1.41562e-13	1.64519e-11
Klk14	41.6219	3.86053	0.733608	5.26239	1.42195e-07	3.93095e-06
Tgm3	69.3522	3.8539	0.714563	5.39337	6.91497e-08	2.1281e-06
BC035044	70.4769	3.83206	0.950581	4.03129	5.54726e-05	0.000682397
Sdr9c7	40.4251	3.82245	0.900713	4.2438	2.19762e-05	0.000316648
Prl2c2	10.8053	3.81654	1.15943	3.29173	0.000995714	0.0072623
Sdr16c6	49.8031	3.81643	0.83616	4.56424	5.01311e-06	8.95415e-05
Gm13306	11.4069	3.78901	1.00107	3.78496	0.000153733	0.00158441
Klk11	71.4014	3.77906	0.827141	4.56882	4.90467e-06	8.77821e-05
4930539E08Rik	122.203	3.76176	0.458469	8.20504	2.30516e-16	4.11319e-14
Dmbt1	3120.57	3.7259	0.542102	6.87307	6.28361e-12	5.16279e-10
Klk13	355.703	3.72377	0.752888	4.94598	7.57605e-07	1.73132e-05
Prr9	631.19	3.70456	1.0856	3.41244	0.000643831	0.00512005
Cxcl13	38.8563	3.69696	0.780123	4.73895	2.14832e-06	4.31251e-05
Rptn	511.284	3.66664	0.741736	4.94333	7.68003e-07	1.75281e-05
Il13ra2	40.5654	3.63453	0.876737	4.14552	3.3904e-05	0.000450989
Slfn4	963.29	3.60939	0.59229	6.09395	1.10156e-09	5.27343e-08
Gpr88	38.5987	3.57066	1.25925	2.83554	0.00457486	0.0241383
Cst6	2622.36	3.5562	0.583551	6.09408	1.10068e-09	5.27343e-08
Ccdc33	111.732	3.51512	0.833161	4.21902	2.45367e-05	0.000347169
Ivl	966.76	3.51084	0.53921	6.51108	7.46127e-11	4.81034e-09
Uox	137.068	3.48167	0.542677	6.41573	1.40152e-10	8.4214e-09
Rnase1	384.786	3.47827	1.32601	2.62311	0.00871301	0.0398228
Ifitm10	670.389	3.43357	0.325981	10.5331	6.08284e-26	4.13282e-23
S100g	5.67763	3.43104	1.32201	2.59532	0.00945021	0.0424131
Defb6	140.906	3.39457	0.86473	3.92559	8.65188e-05	0.000979087
Reg3b	16.5953	3.37608	1.01953	3.31142	0.000928224	0.00690112
AC132444.1	33.6022	3.35233	0.680301	4.92772	8.31962e-07	1.8866e-05
Psapl1	2510.49	3.34787	0.617672	5.42015	5.955e-08	1.86516e-06
Ifitm6	36.8986	3.34244	1.07646	3.10503	0.00190262	0.0121996
Ifitm1	845.473	3.33027	0.25136	13.249	4.57184e-40	2.01904e-36
Sncg	37.377	3.2584	0.463787	7.02565	2.13075e-12	2.01282e-10
Apol8	154.465	3.25347	0.351587	9.25367	2.16923e-20	7.36914e-18
Clec3b	440.48	3.22724	0.813715	3.96606	7.307e-05	0.000852563
Cyp2f2	2892.96	3.20076	0.642566	4.98122	6.31842e-07	1.47055e-05
Sftpd	234.109	3.1784	0.488601	6.50512	7.76327e-11	4.93303e-09
Gm16026	59.0703	3.163	0.826259	3.82809	0.00012914	0.00137757
Capns2	238.621	3.13729	0.700178	4.4807	7.43987e-06	0.000127227
AA467197	358.088	3.10553	0.703337	4.41542	1.00815e-05	0.000165051
Prss27	159.252	3.0703	0.627347	4.8941	9.87565e-07	2.19715e-05
Gm5431	483.742	3.06561	0.368546	8.31812	8.93659e-17	1.75405e-14
Fxyd4	395.948	3.05204	0.664144	4.59545	4.31809e-06	7.87193e-05
Sprr2h	791.789	3.04527	1.15524	2.63604	0.00838802	0.0386763
Serpina3n	1126.82	3.03263	0.695497	4.36038	1.2984e-05	0.000202259
Ace2	212.386	3.02309	0.787946	3.83668	0.000124711	0.00133983
Arg1	9610.5	3.02197	0.444806	6.7939	1.09141e-11	8.41913e-10
Akr1c18	114.96	3.0103	0.624717	4.81866	1.44525e-06	3.06488e-05
Slfn2	1764.98	2.99997	0.313953	9.55548	1.23014e-21	4.82897e-19
Krt80	1868.93	2.99302	0.328727	9.10489	8.63558e-20	2.50078e-17
AC133103.2	69.4049	2.98485	0.701076	4.25753	2.06698e-05	0.000300272
Serpinb2	40.4782	2.97006	0.69509	4.27292	1.92927e-05	0.000282826
S100a2	5.24656	2.96991	1.02052	2.9102	0.00361199	0.0200018
Alox12e	2036.38	2.95826	0.587213	5.03779	4.70939e-07	1.13961e-05
Tmem45a	3270.06	2.95128	0.468891	6.29417	3.09058e-10	1.7061e-08
Cnfn	27.2509	2.94908	0.611295	4.82431	1.40489e-06	2.98285e-05
Vnn3	148.953	2.93958	0.537371	5.4703	4.49274e-08	1.45622e-06
Gabrp	7882.14	2.93015	0.495869	5.90911	3.43954e-09	1.46762e-07
Tprg	277.604	2.91751	0.72935	4.00016	6.33005e-05	0.000760793
Cyp26a1	946.878	2.9157	0.394742	7.38634	1.50929e-13	1.74259e-11
Wdr72	212.002	2.90247	0.296689	9.78286	1.33381e-22	5.60994e-20
Akr1c12	26.9829	2.90128	1.0623	2.73112	0.00631204	0.0309728
Akr1c13	286.915	2.899	0.46699	6.20785	5.37128e-10	2.82424e-08
Gm15433	364.004	2.89832	0.530518	5.46319	4.67655e-08	1.5075e-06
Klk7	378.368	2.89178	0.664124	4.35427	1.33509e-05	0.000207243
Gm44223	22.031	2.89103	0.978197	2.95547	0.00312196	0.0178362
Sectm1a	145.187	2.88447	0.367626	7.84622	4.28755e-15	6.05916e-13
Gm8493	8.90389	2.83468	0.723751	3.91665	8.97881e-05	0.00100962
Matn4	1510.31	2.82948	0.558604	5.06527	4.07832e-07	1.00479e-05
Gm7609	764.053	2.82681	0.512482	5.51593	3.46944e-08	1.16142e-06
Dsc1	1385.62	2.82434	1.08931	2.59278	0.0095204	0.0425767
Cyp2b10	182.955	2.80801	0.735908	3.81571	0.000135791	0.00143529
Prl2c3	31.4853	2.80748	0.812947	3.45346	0.000553447	0.00454516
Tmprss7	42.3644	2.80638	0.872779	3.21546	0.00130237	0.00902517
Bpifb1	46.8797	2.80614	0.683032	4.10836	3.98485e-05	0.00051721
Vnn1	67.4352	2.80608	0.702325	3.99541	6.45811e-05	0.000772917
Skint2	69.7848	2.79337	1.06699	2.61798	0.0088451	0.040291
Rai2	661.351	2.78643	0.460373	6.05256	1.4256e-09	6.73348e-08
Igfals	804.15	2.77012	0.402451	6.88312	5.85549e-12	4.85621e-10
Ppp1r14d	15.8654	2.76107	0.752435	3.66952	0.000243011	0.00231917
Dhrs9	146.926	2.74818	0.422069	6.51122	7.45442e-11	4.81034e-09
Tacr1	132.041	2.7356	0.497877	5.49454	3.91739e-08	1.30321e-06
Klk10	649.357	2.73376	0.786174	3.47729	0.000506506	0.00422049
Csprs	3366.54	2.73142	0.488926	5.58657	2.31603e-08	8.29872e-07
Endod1	4968.57	2.73067	0.404795	6.74582	1.5217e-11	1.14498e-09
Cntn2	917.526	2.71041	0.441194	6.14336	8.07936e-10	4.07777e-08
Mesp1	33.8447	2.70673	0.506806	5.34076	9.25587e-08	2.73258e-06
Aqp4	251.514	2.70552	0.690011	3.92097	8.81918e-05	0.000993564
Gm2619	282.324	2.68697	0.439863	6.10865	1.00478e-09	4.91673e-08
Lrat	110.78	2.68043	0.803715	3.33505	0.000852848	0.00643003
Cib3	25.1668	2.67697	0.577002	4.63945	3.4933e-06	6.56518e-05
Lhb	17.1717	2.67606	0.628074	4.26074	2.03747e-05	0.000296718
Dpt	891.609	2.65927	1.04227	2.55142	0.0107284	0.0464729
Gm13146	19.192	2.65458	0.871236	3.04692	0.00231202	0.0142704
Fndc1	935.788	2.6423	0.642594	4.11193	3.92369e-05	0.000510398
Rgs4	575.273	2.63373	0.470431	5.59853	2.16173e-08	7.79325e-07
Tnxb	1145.41	2.63103	0.778777	3.37841	0.000729075	0.00565369
Tcfl5	41.7117	2.61268	0.725103	3.60319	0.000314339	0.00287806
Trex1	1721.36	2.6117	0.214469	12.1775	4.09662e-34	8.04075e-31
Gm12897	5.02163	2.58985	0.968872	2.67306	0.00751639	0.0353695
AC168977.2	85.9589	2.58555	0.582145	4.44142	8.93663e-06	0.000149648
Padi1	751.362	2.58519	0.584244	4.42484	9.6512e-06	0.000159489
Cxcl11	80.6477	2.57987	0.384838	6.70379	2.03076e-11	1.49472e-09
Serpinb11	878.833	2.57397	0.723311	3.55859	0.000372847	0.00329317
Masp1	474.812	2.56274	0.397404	6.44868	1.12825e-10	6.92033e-09
AC125149.3	111.156	2.55714	0.418238	6.11408	9.71166e-10	4.76546e-08
Pcolce2	99.653	2.54533	0.946196	2.69006	0.00714384	0.0340794
Serpinb1a	626.228	2.54388	0.399938	6.36069	2.00853e-10	1.15572e-08
Rtn4r	49.9305	2.54303	0.617933	4.11538	3.86538e-05	0.000504914
Ifi27l2a	3672.54	2.53676	0.48313	5.25067	1.51546e-07	4.15047e-06
Acer1	54.28	2.53153	0.687083	3.68446	0.000229189	0.00220754
Gm6551	67.9829	2.5308	0.740685	3.41683	0.000633544	0.0050549
AA986860	430.829	2.52919	0.174006	14.5351	7.26131e-48	4.2757e-44
Best2	79.2926	2.5202	0.850267	2.964	0.00303664	0.0175073
A630023A22Rik	18.2983	2.50696	0.674799	3.71512	0.00020311	0.00200108
Rpl10-ps6	15.755	2.49349	0.836436	2.98109	0.00287226	0.0168008
Ogn	289.345	2.47358	0.85045	2.90856	0.00363102	0.0200853
Sprr1b	384.174	2.47344	0.67071	3.68779	0.000226207	0.00218358
Scn8a	40.3817	2.47031	0.393435	6.27883	3.41141e-10	1.85995e-08
Apol7a	764.121	2.47029	0.211271	11.6925	1.39174e-31	1.53656e-28
Gjb1	30.9239	2.4694	0.535433	4.61197	3.98866e-06	7.36256e-05
Wfdc12	1529.6	2.46628	0.63281	3.89734	9.72534e-05	0.0010771
AC168977.1	102.493	2.46099	0.401929	6.12295	9.18566e-10	4.53253e-08
Vsnl1	229.322	2.46054	0.424441	5.79713	6.7461e-09	2.7084e-07
Gm7281	28.857	2.44743	0.721567	3.39182	0.000694293	0.0054373
Gm7582	130.416	2.44344	0.589569	4.14444	3.40639e-05	0.000452776
Atp10b	737.989	2.44242	0.503359	4.85224	1.22076e-06	2.6418e-05
Hsd17b2	18.927	2.43997	0.853598	2.85845	0.00425718	0.0228307
Mall	1373.34	2.43485	0.446448	5.45384	4.92944e-08	1.58037e-06
2310007B03Rik	183.481	2.42197	0.575058	4.2117	2.53461e-05	0.000356764
Pglyrp4	308.518	2.41809	0.592113	4.08384	4.42983e-05	0.000566229
Cxcl17	205.043	2.40753	0.303423	7.93457	2.11226e-15	3.27308e-13
Mx1	1701.61	2.40374	0.242332	9.91919	3.43527e-23	1.68567e-20
Ifi203-ps	85.2585	2.39979	0.395332	6.07032	1.27654e-09	6.06185e-08
Timd2	51.049	2.39332	0.54013	4.431	9.3798e-06	0.000156315
Pla2g2f	381.305	2.38567	0.549242	4.34357	1.40185e-05	0.000216276
Calml3	3873.69	2.38364	0.268475	8.87845	6.77983e-19	1.76126e-16
Prelp	1844.32	2.37805	0.149393	15.9181	4.74323e-57	8.37892e-53
Orm1	39.3054	2.3746	0.383852	6.18624	6.16172e-10	3.19199e-08
Slco3a1	2380.33	2.37383	0.278773	8.51527	1.66199e-17	3.53723e-15
Bbox1	1455.99	2.36912	0.527545	4.49084	7.0943e-06	0.000122026
Pcdhgb4	94.4222	2.36512	0.618008	3.827	0.000129713	0.00138285
Skint8	254.473	2.36233	0.769351	3.07054	0.00213669	0.0134084
Speer6-ps1	54.9048	2.35973	0.492995	4.78653	1.69691e-06	3.53072e-05
Mroh6	50.3003	2.35795	0.651916	3.61695	0.000298095	0.00275123
Pnpla1	221.722	2.35472	0.448623	5.24877	1.53116e-07	4.18698e-06
Pdzk1ip1	907.037	2.35422	0.380364	6.18938	6.0403e-10	3.14755e-08
Gm14137	347.809	2.35209	0.436021	5.39445	6.87323e-08	2.11895e-06
Gvin1	945.908	2.35128	0.295326	7.96164	1.69773e-15	2.67772e-13
Shank1	326.949	2.34563	0.408491	5.74218	9.34641e-09	3.70189e-07
Pla2g4f	244.243	2.34118	0.501792	4.66564	3.07654e-06	5.86268e-05
Dynap	48.2507	2.34093	0.810966	2.88659	0.00389438	0.0212459
Rassf10	1481.7	2.33068	0.613683	3.79785	0.000145954	0.00151931
Cd200r3	78.3186	2.3141	0.728055	3.17847	0.00148053	0.00997087
Wnt10a	792.417	2.30775	0.266341	8.66468	4.52797e-18	1.03879e-15
Foxi3	39.9219	2.29933	0.844597	2.7224	0.00648095	0.0316464
Pi16	401.646	2.29639	0.788173	2.91356	0.00357328	0.0198185
Adh1	77.777	2.29314	0.488531	4.69395	2.67974e-06	5.20193e-05
Clca3a1	1058.67	2.28798	0.493741	4.63398	3.58702e-06	6.71236e-05
AU021092	161.375	2.28734	0.686856	3.33017	0.000867945	0.00653548
Irf7	8793.95	2.27995	0.264401	8.6231	6.51628e-18	1.47577e-15
Ly6c1	1291.44	2.26693	0.515582	4.39684	1.09839e-05	0.000177036
Gm13245	6.96587	2.26557	0.885309	2.55908	0.010495	0.0458104
BC023105	82.233	2.26082	0.360008	6.27991	3.38765e-10	1.85272e-08
Slc4a8	49.3763	2.2597	0.376086	6.00848	1.87267e-09	8.5924e-08
Gm2666	91.8347	2.2545	0.474202	4.7543	1.99133e-06	4.05731e-05
Hcn4	154.062	2.25133	0.684836	3.2874	0.00101117	0.00735076
Slc25a48	176.324	2.24944	0.360996	6.23121	4.62834e-10	2.47008e-08
Gm11992	44.3016	2.2401	0.493392	4.5402	5.62008e-06	9.90805e-05
Scel	198.176	2.23999	0.629079	3.56075	0.000369797	0.00327249
Ifit3b	1469.82	2.21928	0.363717	6.10168	1.0496e-09	5.0659e-08
Dapk2	384.562	2.21841	0.555992	3.99	6.60731e-05	0.000787041
Clic3	150.27	2.2138	0.268518	8.24449	1.65864e-16	3.11701e-14
1700066B19Rik	48.4579	2.21277	0.434219	5.09599	3.46929e-07	8.68059e-06
Fam83e	554.115	2.20901	0.389054	5.6779	1.36362e-08	5.12517e-07
Prob1	811.892	2.20849	0.467975	4.71925	2.36716e-06	4.67738e-05
Galnt14	126.611	2.2066	0.772129	2.85782	0.00426565	0.0228617
4833423E24Rik	488.463	2.20495	0.59752	3.69017	0.000224102	0.00216562
1500009C09Rik	65.066	2.204	0.682796	3.2279	0.00124704	0.00870616
P2ry14	40.6741	2.19598	0.589033	3.72811	0.000192921	0.00191243
Ifit1	3656.74	2.19229	0.27561	7.95432	1.80117e-15	2.81573e-13
Ifit3	4721.25	2.19135	0.435131	5.03608	4.75162e-07	1.14826e-05
AC132444.2	12.8847	2.18845	0.813936	2.68872	0.00717257	0.0341506
AC132444.4	12.8847	2.18845	0.813936	2.68872	0.00717257	0.0341506
AC133103.6	12.8847	2.18845	0.813936	2.68872	0.00717257	0.0341506
Ly6a	19690.4	2.18564	0.354618	6.16338	7.12079e-10	3.62503e-08
AC133103.1	96.1033	2.18549	0.280655	7.78709	6.85674e-15	9.53204e-13
Rtn4rl1	96.3942	2.18533	0.441764	4.94683	7.54317e-07	1.72604e-05
Adrb3	37.2287	2.18477	0.823739	2.65226	0.00799545	0.0372369
Ubd	1530.76	2.18227	0.462597	4.71744	2.38834e-06	4.70871e-05
Clu	24730.2	2.18094	0.399362	5.46108	4.73254e-08	1.52001e-06
Rtn2	384.46	2.17841	0.423685	5.14158	2.72431e-07	7.03345e-06
Adam28	504.429	2.17595	0.655485	3.31961	0.000901429	0.00673024
Aldh3b2	881.29	2.17209	0.595933	3.64486	0.000267539	0.00251923
Rab38	794.476	2.16624	0.563794	3.84225	0.00012191	0.00131474
Nfe2l3	968.601	2.15786	0.410451	5.2573	1.46183e-07	4.01605e-06
Rbpjl	67.2372	2.15051	0.450786	4.77058	1.83697e-06	3.79089e-05
Endou	191.285	2.14824	0.485043	4.42897	9.46844e-06	0.000157199
3830417A13Rik	138.199	2.14799	0.529695	4.05515	5.01018e-05	0.000626804
Ret	97.4508	2.14581	0.422505	5.07878	3.79868e-07	9.42467e-06
Asprv1	1834.4	2.1441	0.629469	3.40621	0.000658711	0.00521098
2310034G01Rik	38.0582	2.14146	0.400786	5.34315	9.13451e-08	2.7074e-06
C4b	3228.23	2.1413	0.607033	3.52749	0.00041952	0.00362742
Krt78	903.562	2.13798	0.63343	3.37524	0.000737503	0.00570153
Lor	44.7518	2.13763	0.6707	3.18716	0.00143676	0.00972428
Gm12573	16.9541	2.13521	0.599366	3.56246	0.000367401	0.00325974
Scnn1a	1617.33	2.13296	0.413542	5.15779	2.49881e-07	6.52015e-06
Ltf	16541.9	2.13229	0.48139	4.42943	9.44808e-06	0.000157009
Hnmt	25.5082	2.13016	0.406618	5.23873	1.61682e-07	4.4008e-06
Nlrp10	2346.45	2.12884	0.708585	3.00436	0.0026614	0.0158562
Gm13241	30.589	2.11807	0.662409	3.19753	0.00138609	0.00948942
Fam71a	373.113	2.11752	0.419774	5.04442	4.54894e-07	1.1038e-05
Oasl1	2537.48	2.11618	0.287291	7.36599	1.75834e-13	1.98265e-11
Ly6g6e	457.359	2.11608	0.535928	3.94845	7.86597e-05	0.000904637
Casq2	742.789	2.11223	0.459602	4.59578	4.31126e-06	7.8676e-05
Sectm1b	644.354	2.10951	0.379495	5.55873	2.7174e-08	9.48674e-07
Otud7a	175.268	2.10266	0.33029	6.36612	1.93875e-10	1.12501e-08
1700007K13Rik	65.8915	2.09678	0.369479	5.67496	1.38717e-08	5.18064e-07
Ifi209	307.96	2.08498	0.500799	4.1633	3.13676e-05	0.000425257
BC016579	210.985	2.07979	0.578318	3.59627	0.000322809	0.00293636
Trim30a	1377.4	2.0766	0.277385	7.48633	7.08261e-14	8.34095e-12
Slc6a14	541.951	2.07628	0.568212	3.65407	0.000258119	0.00243758
Gm4070	678.612	2.06548	0.332721	6.20784	5.3719e-10	2.82424e-08
Pamr1	200.004	2.06092	0.600555	3.43169	0.00059984	0.00484729
Gm17709	39.9142	2.0606	0.434212	4.7456	2.07892e-06	4.20185e-05
Gm10330	39.0516	2.04713	0.383762	5.33437	9.58759e-08	2.81337e-06
B3galt4	164.95	2.04693	0.277781	7.36888	1.72071e-13	1.96105e-11
Apol6	372.643	2.04169	0.311967	6.54458	5.96638e-11	3.94742e-09
Trex2	16.6601	2.03968	0.638963	3.19217	0.00141209	0.00962365
C130026I21Rik	400.281	2.03931	0.329639	6.18648	6.15215e-10	3.19199e-08
Adgrd1	214.933	2.03835	0.716046	2.84668	0.00441782	0.0234969
Aadac	36.7954	2.03558	0.633788	3.21177	0.00131921	0.00911733
Cfap157	35.4985	2.03435	0.486171	4.18444	2.85872e-05	0.000394526
Gm47435	10.4046	2.03264	0.725904	2.80015	0.00510788	0.0263833
Tnfsf10	3791.03	2.03163	0.366876	5.53763	3.06586e-08	1.04503e-06
Susd2	475.488	2.02633	0.343255	5.90328	3.56349e-09	1.50957e-07
Rtp4	3664.93	2.0216	0.242126	8.34939	6.86158e-17	1.39322e-14
Sel1l3	1480.23	2.01702	0.560358	3.59952	0.000318799	0.00290587
Iqcn	77.5292	2.01606	0.663305	3.03941	0.00237041	0.0145242
Rbp2	132.577	2.01462	0.674586	2.98646	0.0028223	0.0165855
Sostdc1	2234.21	2.00898	0.287693	6.98307	2.88804e-12	2.58971e-10
Foxq1	2557.03	2.00786	0.499092	4.02302	5.74556e-05	0.000701904
Sulf1	739.449	2.00684	0.317482	6.32113	2.59652e-10	1.44692e-08
Ggt6	670.937	1.98916	0.377336	5.27159	1.3525e-07	3.79236e-06
Gm5886	52.0738	1.98175	0.763311	2.59625	0.00942464	0.0423306
Slc39a8	673.749	1.97753	0.450735	4.38734	1.14745e-05	0.000182611
Ifi47	2941.1	1.97704	0.207075	9.54743	1.32948e-21	5.1055e-19
Acod1	107.669	1.97675	0.71112	2.77977	0.00543974	0.0276129
Hgfac	33.9313	1.97565	0.598258	3.30235	0.000958794	0.00708369
Fam3b	194.129	1.97521	0.669292	2.9512	0.00316543	0.0180379
Cntf	64.2283	1.97328	0.354665	5.56378	2.6399e-08	9.27113e-07
Thsd7a	310.404	1.96976	0.355779	5.53646	3.08652e-08	1.04852e-06
Tmem95	80.6359	1.96645	0.402131	4.89007	1.00802e-06	2.23301e-05
Slc39a2	74.5985	1.95834	0.273459	7.16138	7.98685e-13	8.01635e-11
Gpr87	743.833	1.95766	0.755799	2.59018	0.00959249	0.0428232
Plekhs1	1242.85	1.95311	0.518102	3.76974	0.000163421	0.00166292
Pde1c	127.928	1.95198	0.467505	4.17532	2.97573e-05	0.000408758
Isg15	7834.53	1.9443	0.35529	5.47242	4.4394e-08	1.44424e-06
Gda	1899.32	1.93881	0.53852	3.60026	0.0003179	0.00289917
Hpgd	1348.73	1.93809	0.292421	6.62774	3.40859e-11	2.35206e-09
Gjb5	110.643	1.93724	0.383612	5.04999	4.41827e-07	1.07653e-05
Mndal	1964.06	1.93722	0.325484	5.95181	2.65197e-09	1.17411e-07
Sdr16c5	35.1941	1.93528	0.699667	2.766	0.00567478	0.0284949
Sh2d4b	54.9089	1.92933	0.408785	4.71967	2.36226e-06	4.67294e-05
Sytl2	891.694	1.92457	0.408463	4.71174	2.4561e-06	4.83689e-05
Ltc4s	28.3514	1.92068	0.731066	2.62724	0.00860818	0.0394151
Slc5a9	1129.97	1.91942	0.407532	4.70986	2.47886e-06	4.87629e-05
Gm17083	22.3129	1.9185	0.701502	2.73485	0.00624094	0.0307007
Slc6a2	105.856	1.91617	0.552608	3.4675	0.000525317	0.00434647
B3gnt8	452.129	1.91417	0.247554	7.73235	1.05581e-14	1.41295e-12
Adgrf4	1320.12	1.91351	0.696535	2.74718	0.00601105	0.0298105
Ifi202b	745.848	1.90965	0.472996	4.03735	5.40584e-05	0.000668312
Alox12	1753.24	1.9063	0.532853	3.57754	0.000346849	0.0031102
Muc16	312.465	1.90422	0.672615	2.83107	0.00463925	0.0243906
Dlg2	46.5849	1.90083	0.679629	2.79686	0.00516012	0.0265754
Mesp2	51.771	1.89757	0.359012	5.28553	1.25341e-07	3.54831e-06
Gm12250	1188.34	1.89434	0.320827	5.90456	3.53583e-09	1.50145e-07
C3	7261.99	1.8901	0.516753	3.65765	0.000254536	0.00241222
Acsl1	1233.96	1.88874	0.373116	5.06208	4.14709e-07	1.01889e-05
Kcnrg	38.7954	1.87868	0.607427	3.09285	0.00198241	0.0126241
Hgf	305.2	1.87546	0.569415	3.29366	0.000988903	0.00723353
Gm49500	15.5993	1.87446	0.649941	2.88405	0.00392597	0.0213786
Il4ra	5347.38	1.86894	0.419622	4.45386	8.43405e-06	0.000142299
Ifi208	113.601	1.86218	0.54425	3.42155	0.000622653	0.00499055
Hsh2d	188.823	1.8551	0.412965	4.49215	7.05089e-06	0.000121516
Chl1	768.938	1.84867	0.470046	3.93296	8.39052e-05	0.000952515
Exph5	810.266	1.84394	0.561352	3.28482	0.00102047	0.00740921
Pglyrp1	279.02	1.83461	0.319674	5.73902	9.52287e-09	3.76334e-07
Kcnq1	68.903	1.83346	0.414911	4.41893	9.91901e-06	0.000163135
Bace2	1134.33	1.82962	0.341789	5.35306	8.64798e-08	2.58488e-06
Il1rn	1009.02	1.82608	0.484459	3.76932	0.000163695	0.00166475
Anxa1	37612	1.82447	0.360745	5.0575	4.24795e-07	1.03777e-05
Krt23	1355.61	1.82141	0.482851	3.7722	0.000161814	0.00164942
5730507C01Rik	115.374	1.79809	0.459794	3.91063	9.20542e-05	0.0010292
Naprt	325.555	1.79703	0.201984	8.8969	5.74282e-19	1.51413e-16
Kcnk7	178.831	1.7965	0.571926	3.14114	0.0016829	0.0110607
Mpig6b	35.2167	1.78671	0.522967	3.41649	0.000634347	0.00505674
Tchh	758.962	1.78586	0.529762	3.37106	0.000748784	0.005761
Krt4	2742.53	1.78141	0.594048	2.99876	0.0027108	0.0160908
Fibin	1147	1.77892	0.344271	5.1672	2.37625e-07	6.2558e-06
Adam8	2264.64	1.77807	0.542712	3.27626	0.00105191	0.00759378
Edn1	681.81	1.7762	0.404005	4.39649	1.10015e-05	0.000177081
Il18	72.4102	1.77549	0.293905	6.04102	1.53147e-09	7.18828e-08
Mfsd5	1734.25	1.7734	0.166508	10.6506	1.73297e-26	1.22452e-23
Gm16505	23.1018	1.7689	0.618131	2.86169	0.00421384	0.0226339
Cldn23	146.467	1.75627	0.349642	5.02306	5.0855e-07	1.21728e-05
Ifi204	1890.39	1.75528	0.398627	4.4033	1.06614e-05	0.000172467
Fut1	70.5596	1.75262	0.637203	2.75048	0.00595077	0.0295864
Nupr1	3263.28	1.75246	0.261701	6.69641	2.13595e-11	1.56563e-09
Nxnl2	40.4855	1.75199	0.376276	4.65614	3.22189e-06	6.10672e-05
Gbp5	796.525	1.7519	0.377863	4.63633	3.54653e-06	6.64364e-05
Ly6k	112.786	1.74999	0.616968	2.83643	0.00456207	0.0240996
Lpar5	172.803	1.74993	0.382876	4.57048	4.8661e-06	8.73284e-05
Hps6	355.467	1.74831	0.164124	10.6523	1.7002e-26	1.22452e-23
Ptk6	75.8983	1.74787	0.530818	3.29279	0.000991991	0.00725011
Ccser1	142.797	1.74643	0.59039	2.9581	0.0030954	0.0177361
Cxcl10	3887.5	1.74586	0.421434	4.14266	3.43301e-05	0.000455944
Il1f9	109.47	1.74576	0.442171	3.94816	7.87541e-05	0.000905134
Apol9b	1998.18	1.74401	0.312647	5.57821	2.43e-08	8.60241e-07
Srd5a1	1822.93	1.74253	0.49388	3.52825	0.000418314	0.00362054
Irgm1	7294.05	1.7383	0.257917	6.73978	1.58622e-11	1.1823e-09
Gpt	776.339	1.7381	0.223411	7.77981	7.26334e-15	9.94627e-13
Clca2	2060.48	1.73757	0.55929	3.10673	0.00189166	0.0121358
Oasl2	9113.59	1.73313	0.223482	7.75512	8.82617e-15	1.19934e-12
Lgals3bp	16572.1	1.73246	0.212672	8.14617	3.75627e-16	6.56975e-14
Syt8	319.563	1.72771	0.550383	3.13911	0.00169463	0.0111243
Ceacam19	166.606	1.72211	0.257669	6.68344	2.33401e-11	1.68287e-09
Col20a1	315.049	1.72019	0.368902	4.66301	3.11624e-06	5.93194e-05
Defb1	300.191	1.72007	0.414373	4.15101	3.31012e-05	0.000442979
Lrrc26	212.702	1.71986	0.623461	2.75857	0.00580553	0.0290194
Anxa8	8189.84	1.71626	0.564222	3.04182	0.00235155	0.0144286
Slc45a3	958.656	1.71108	0.163285	10.4791	1.07794e-25	7.05252e-23
Tmprss11e	127.094	1.70862	0.570994	2.99235	0.00276834	0.0163664
Vegfd	406.968	1.70577	0.464367	3.67332	0.000239417	0.00228982
Misp	243.332	1.70392	0.475406	3.58414	0.000338185	0.00304642
Trim72	42.49	1.69977	0.598221	2.84137	0.00449196	0.023829
Gsto2	41.2251	1.69941	0.598788	2.83808	0.00453856	0.0240185
Trim30d	432.643	1.69248	0.214534	7.8891	3.0437e-15	4.4614e-13
Ifi44	2119.91	1.69179	0.272141	6.2166	5.0805e-10	2.69511e-08
Klk6	130.481	1.69019	0.497809	3.39525	0.000685654	0.00538076
C2	1248.45	1.6895	0.502183	3.36431	0.000767341	0.00588073
Gm49760	37.1119	1.68691	0.335409	5.02942	4.91965e-07	1.18723e-05
Pde8a	103.411	1.68534	0.627499	2.6858	0.0072356	0.0343686
Tmem139	163.213	1.68386	0.244299	6.89265	5.47626e-12	4.58474e-10
Hal	136.819	1.68275	0.492768	3.4149	0.000638063	0.00507949
Ggt5	549.227	1.68136	0.289103	5.81576	6.03579e-09	2.44546e-07
Anpep	6463.8	1.67663	0.407627	4.11314	3.90311e-05	0.000508095
Ackr3	1083.07	1.67474	0.326107	5.13556	2.81303e-07	7.21651e-06
Dpyd	650.634	1.67467	0.566009	2.95873	0.0030891	0.0177057
Gm17555	16.7974	1.67223	0.628117	2.66229	0.00776111	0.0363468
Vsig10l	147.023	1.67033	0.308293	5.41801	6.02652e-08	1.88089e-06
4932414N04Rik	19.8944	1.6686	0.471413	3.53957	0.000400782	0.00349448
Smim22	156.881	1.66758	0.322822	5.16563	2.39633e-07	6.29928e-06
F8a	177.058	1.66606	0.271442	6.13784	8.36532e-10	4.18621e-08
Ifi211	1376.73	1.66337	0.535075	3.10866	0.00187935	0.0120679
Dkk2	242.854	1.66288	0.349842	4.75324	2.00179e-06	4.07391e-05
Spsb2	621.648	1.6598	0.209433	7.9252	2.27771e-15	3.4686e-13
Il18bp	398.312	1.65529	0.303922	5.44642	5.13924e-08	1.62989e-06
Sprr1a	17959.2	1.6534	0.589858	2.80305	0.00506217	0.0261931
Pycard	2026.84	1.64932	0.482581	3.41771	0.000631512	0.00504233
Scube3	573.835	1.64536	0.451456	3.64456	0.000267853	0.0025195
Atp2c2	898.069	1.6398	0.328112	4.99769	5.80218e-07	1.36479e-05
Adhfe1	83.6147	1.6355	0.322266	5.07499	3.87517e-07	9.60097e-06
Cables1	606.119	1.63503	0.253015	6.46221	1.03182e-10	6.41797e-09
Gbp8	203.486	1.63479	0.347898	4.69907	2.61354e-06	5.10711e-05
Dusp14	691.277	1.63172	0.371577	4.39135	1.12649e-05	0.000179598
Lgr5	362.108	1.63162	0.303068	5.38368	7.29773e-08	2.22266e-06
H2-Q7	30143.3	1.63126	0.261855	6.22963	4.67532e-10	2.48764e-08
Ifi205	285.868	1.62862	0.580351	2.80627	0.00501191	0.025975
Smpdl3a	1088.48	1.62852	0.363839	4.47593	7.60805e-06	0.000129479
Irgm2	2695.64	1.62715	0.261029	6.23362	4.55776e-10	2.4472e-08
Lmo1	878.464	1.62361	0.162258	10.0063	1.42989e-23	7.4291e-21
Rnf113a2	441.653	1.62083	0.186268	8.70161	3.27205e-18	7.81092e-16
Hsd17b7	1612.81	1.62039	0.174822	9.26877	1.88312e-20	6.5226e-18
Diras2	111.312	1.62007	0.323525	5.00757	5.51211e-07	1.31052e-05
Znfx1	4352.43	1.61131	0.174964	9.20939	3.27993e-20	1.07296e-17
Card14	94.5849	1.60868	0.542291	2.96645	0.00301256	0.0174025
Nxt1	900.003	1.60793	0.188078	8.54924	1.23898e-17	2.70204e-15
H2-K2	323.457	1.60383	0.337268	4.75537	1.98083e-06	4.04056e-05
Ltb4r1	135.872	1.60105	0.371831	4.30586	1.66337e-05	0.000249223
H2-T22	13989.6	1.60073	0.228368	7.00942	2.39307e-12	2.21328e-10
Flt1	3133.48	1.60061	0.433505	3.69225	0.000222283	0.00215157
Bspry	1689.09	1.59827	0.267586	5.97291	2.33059e-09	1.04758e-07
Sp100	2411.96	1.59735	0.201796	7.91569	2.45886e-15	3.71245e-13
Tmem221	70.5282	1.59406	0.362759	4.39427	1.11146e-05	0.000178005
Slc27a3	1267.86	1.58691	0.210589	7.53555	4.86265e-14	5.92404e-12
Ecm1	10175.1	1.58427	0.427761	3.70363	0.000212536	0.00207543
Ptpru	2822.31	1.58367	0.262187	6.04024	1.53885e-09	7.19145e-08
Tox3	123.272	1.582	0.394105	4.01415	5.96605e-05	0.00072483
Fuom	298.938	1.58102	0.249413	6.33897	2.31302e-10	1.30542e-08
Isg20	868.04	1.58066	0.215877	7.32203	2.4424e-13	2.6308e-11
Rab27a	530.931	1.57997	0.269538	5.86178	4.57928e-09	1.91236e-07
Stx11	402.581	1.57718	0.348036	4.53166	5.8523e-06	0.000102662
BC064078	2148.64	1.57644	0.336744	4.68141	2.84907e-06	5.47053e-05
Gm49377	54.525	1.57226	0.504892	3.11406	0.0018453	0.0118838
Slc23a4	39.146	1.57186	0.384066	4.09268	4.26424e-05	0.000547043
Nipal4	363.432	1.56934	0.280958	5.58568	2.32786e-08	8.32423e-07
Ltbp1	5431.47	1.56889	0.255009	6.15228	7.63752e-10	3.86581e-08
CAAA01141682.1	32.7196	1.56876	0.601871	2.60647	0.00914797	0.0413724
Krt87	100.528	1.56496	0.450316	3.47524	0.000510401	0.00424693
Klk8	248.415	1.56316	0.611182	2.5576	0.0105398	0.0459716
2010109I03Rik	65.8645	1.56286	0.364888	4.28311	1.84299e-05	0.000271756
Afdn	8167.39	1.56056	0.229337	6.80465	1.01296e-11	7.8828e-10
Hbegf	1845.23	1.55917	0.365481	4.26608	1.98934e-05	0.000290427
Gjb2	1626.22	1.55735	0.440945	3.53184	0.000412685	0.00358941
Ahnak2	1489.72	1.55478	0.293156	5.30358	1.13553e-07	3.25108e-06
Fbxo36	156.995	1.55468	0.244227	6.36575	1.94342e-10	1.12501e-08
Klf8	75.5686	1.55357	0.44345	3.50337	0.000459414	0.00390145
Irf4	119.465	1.55064	0.573566	2.70351	0.0068611	0.033016
Fam84a	6514.34	1.54899	0.516152	3.00104	0.00269063	0.0159926
Eppk1	2143.09	1.54634	0.163775	9.44186	3.66233e-21	1.34781e-18
Slc2a12	172.716	1.54583	0.442315	3.49487	0.000474301	0.00400312
Zfp993	141.214	1.54466	0.389861	3.96208	7.42985e-05	0.000866325
Tnfaip8l1	178.169	1.54289	0.299909	5.14453	2.68185e-07	6.95668e-06
Blnk	529.734	1.54257	0.392072	3.93441	8.34023e-05	0.000947995
Il22ra1	101.367	1.54134	0.529775	2.90942	0.00362104	0.0200394
Gm10478	17.1299	1.53822	0.570724	2.6952	0.00703454	0.0336398
Mmp15	7689.05	1.53807	0.355762	4.32331	1.53708e-05	0.000233069
Gimap9	299.654	1.53627	0.141351	10.8685	1.62835e-27	1.30749e-24
Tent5b	758.335	1.53428	0.166528	9.21335	3.16113e-20	1.05361e-17
Zfp992	188.432	1.53201	0.350134	4.37549	1.21159e-05	0.00018974
Gbp10	97.7502	1.53037	0.376006	4.07008	4.69969e-05	0.000591311
Susd4	274.686	1.52165	0.379524	4.00935	6.08853e-05	0.000737175
Slc22a18	194.405	1.52116	0.283275	5.36989	7.87827e-08	2.38304e-06
Oas2	4409.17	1.51971	0.287091	5.29347	1.20015e-07	3.41394e-06
Kctd14	580.146	1.51922	0.2281	6.66031	2.73252e-11	1.94637e-09
Tst	2126.36	1.51713	0.459383	3.30253	0.000958174	0.00708207
Slc23a3	43.1043	1.51633	0.50679	2.99202	0.00277134	0.0163786
Pfkfb4	521.121	1.50932	0.182132	8.287	1.16144e-16	2.2061e-14
Atp6v1c2	1207.98	1.50764	0.412354	3.65619	0.000255996	0.00242346
Cmpk2	1382.01	1.50686	0.235851	6.38902	1.66952e-10	9.86356e-09
Lipg	368.587	1.50221	0.350198	4.28962	1.78982e-05	0.0002648
Moxd1	6450.04	1.50212	0.352566	4.26054	2.03934e-05	0.000296746
Dusp10	1332.7	1.50133	0.363342	4.132	3.59619e-05	0.000474788
Ltb4r2	260.701	1.50089	0.346791	4.32794	1.5051e-05	0.000228809
Id1	1468.85	1.50071	0.336159	4.46429	8.03348e-06	0.000136061
Arhgap8	341.567	1.50064	0.204981	7.32086	2.46384e-13	2.6378e-11
Prrg3	123.028	1.49619	0.36	4.15608	3.23747e-05	0.000435236
Mfsd9	955.072	1.4937	0.504683	2.95968	0.00307957	0.0176625
Zbp1	2542.35	1.49343	0.297006	5.0283	4.94847e-07	1.19256e-05
Foxc1	1955.96	1.49318	0.324517	4.60125	4.19964e-06	7.69571e-05
Sco2	128.418	1.493	0.286454	5.21202	1.86794e-07	5.03302e-06
Itga11	230.788	1.4926	0.394113	3.78724	0.000152329	0.00157401
Nudt18	941.797	1.4919	0.414239	3.60154	0.000316337	0.00288772
Apol9a	2696.81	1.4914	0.3433	4.3443	1.39718e-05	0.000215744
Adrb2	254.016	1.48662	0.344108	4.32022	1.55874e-05	0.000235948
Gm45799	108.407	1.48037	0.396249	3.73596	0.000186998	0.00186629
Ifitm3	18087.4	1.47912	0.281061	5.26262	1.42017e-07	3.93095e-06
Urah	1571.49	1.47881	0.428093	3.45442	0.000551478	0.0045311
Tcaf2	4338.67	1.47532	0.35375	4.1705	3.03929e-05	0.000415229
Itprid1	310.949	1.47219	0.34965	4.21048	2.54827e-05	0.000358401
Cysrt1	189.762	1.46901	0.499058	2.94357	0.00324446	0.0184228
Zbtb7c	2111.65	1.46897	0.336307	4.36795	1.25416e-05	0.000195713
Mroh2a	534.137	1.46726	0.317509	4.62115	3.81625e-06	7.0813e-05
Phf11d	2234.61	1.46667	0.21718	6.75324	1.44577e-11	1.09612e-09
Rpp25l	928.768	1.46397	0.209322	6.99386	2.67422e-12	2.42257e-10
Gpr155	1174.96	1.46235	0.472871	3.09249	0.00198484	0.012635
Kcnh1	1127.94	1.46163	0.370785	3.94199	8.08098e-05	0.000921566
Nlrx1	1544.01	1.46163	0.302825	4.82664	1.38855e-06	2.95884e-05
Trim34a	649.504	1.46085	0.302717	4.82581	1.39436e-06	2.96764e-05
Ephb6	3434.06	1.45222	0.166992	8.69632	3.42813e-18	8.04902e-16
Trim12a	562.042	1.4508	0.334147	4.34179	1.41325e-05	0.000217656
Tenm2	503.044	1.44993	0.41168	3.52197	0.000428345	0.0036983
Prkaa2	427.281	1.44891	0.316915	4.57192	4.83281e-06	8.68479e-05
Cyfip2	112.243	1.44842	0.449588	3.22165	0.00127454	0.00887107
Lypd3	6488.52	1.44725	0.523092	2.76672	0.00566226	0.0284563
Nedd9	3131.56	1.44453	0.202034	7.14995	8.68087e-13	8.6637e-11
Kif26a	620.373	1.44156	0.49463	2.91441	0.00356358	0.0197771
Rassf7	900.47	1.44003	0.367629	3.91708	8.96298e-05	0.00100848
Oas3	2292.65	1.43919	0.276855	5.19835	2.01064e-07	5.37337e-06
Ccdc88b	276.854	1.43834	0.558607	2.57486	0.0100279	0.044408
Ffar4	436.892	1.43826	0.484416	2.96906	0.0029871	0.017305
Bcl11b	1720.61	1.43779	0.426948	3.36761	0.000758228	0.00581594
Bcam	3010.93	1.43433	0.211243	6.78994	1.12183e-11	8.61616e-10
Tent5a	812.755	1.43068	0.24599	5.816	6.02709e-09	2.44546e-07
Mx2	738.004	1.43066	0.378204	3.78277	0.000155094	0.00159379
Cdk5r1	206.152	1.42838	0.403308	3.54166	0.000397611	0.00347025
Pcdh1	2434.49	1.42736	0.352657	4.04745	5.17792e-05	0.00064414
Syt12	264.965	1.42662	0.484283	2.94583	0.00322091	0.0183067
Lgr4	3117.17	1.4198	0.266123	5.33513	9.54768e-08	2.80632e-06
Bmp2	114.383	1.41929	0.373525	3.79971	0.000144865	0.00150976
Nsmce3	620.273	1.41769	0.282475	5.01881	5.19922e-07	1.24282e-05
Vwa7	159.022	1.41758	0.344467	4.11527	3.86724e-05	0.000504914
Gal3st1	147.802	1.4166	0.483225	2.93155	0.00337277	0.0190169
Clec2d	1586.48	1.41583	0.361765	3.91366	9.09073e-05	0.00102025
Krt15	15677	1.4134	0.519736	2.71946	0.00653892	0.0318736
Naip2	204.43	1.41109	0.513674	2.74705	0.0060134	0.0298138
Fhl1	187.244	1.4087	0.501747	2.80759	0.00499139	0.0258951
Klhdc7a	1151.5	1.40806	0.377171	3.73322	0.000189048	0.00188143
Tpgs1	893.303	1.40805	0.142393	9.88852	4.66867e-23	2.22897e-20
Strc	730.246	1.4049	0.480952	2.92107	0.00348827	0.019452
Slfn5	2073.78	1.40374	0.326659	4.29726	1.72919e-05	0.000257339
Mrpl43	1592.42	1.40292	0.152385	9.20646	3.37071e-20	1.08261e-17
Sp110	988.773	1.40012	0.220602	6.3468	2.19838e-10	1.25272e-08
Syt3	33.0083	1.39613	0.367797	3.79593	0.000147092	0.00152846
Ube2l6	1016.66	1.39296	0.319747	4.35645	1.32189e-05	0.000205556
Artn	72.8854	1.39199	0.522124	2.66602	0.00767557	0.0360226
Nudt19	627.798	1.38938	0.21694	6.40446	1.50906e-10	9.00592e-09
Gdpd5	884.746	1.38826	0.336055	4.13104	3.61129e-05	0.00047607
Slc44a4	215.35	1.3874	0.404653	3.42863	0.000606646	0.00488664
Car12	9404.49	1.38613	0.263556	5.25933	1.44581e-07	3.97823e-06
Dclk1	1457.23	1.38552	0.37104	3.73414	0.000188358	0.00187667
Rps4l	473.614	1.38527	0.519128	2.66845	0.00762014	0.0357909
Azin2	614.578	1.38502	0.26256	5.27508	1.32698e-07	3.73265e-06
Mrps34	1431.53	1.38462	0.152964	9.0519	1.40502e-19	4.00318e-17
Gpx2	6159.98	1.38369	0.276818	4.99854	5.77654e-07	1.36239e-05
Chmp1b	2139.07	1.38361	0.207766	6.65946	2.74834e-11	1.94977e-09
Slc24a3	180.05	1.38221	0.353718	3.90767	9.31892e-05	0.00103992
Sfn	29397.3	1.37979	0.383124	3.60142	0.000316481	0.00288772
Gm48774	60.6051	1.37869	0.51914	2.65571	0.0079141	0.0369262
AI429214	118.393	1.3783	0.255868	5.38674	7.17463e-08	2.19653e-06
Slc14a1	326.511	1.37818	0.495778	2.77985	0.00543848	0.0276129
Oas1g	1353.49	1.37691	0.270345	5.09315	3.52165e-07	8.78671e-06
Trim21	842.659	1.37603	0.182036	7.55914	4.05754e-14	5.01234e-12
Prss12	743.124	1.37476	0.383761	3.58233	0.000340546	0.00306457
Atp10a	621.961	1.37395	0.17336	7.92542	2.27368e-15	3.4686e-13
Slc16a13	232.879	1.37282	0.285139	4.81456	1.47524e-06	3.12097e-05
Pmaip1	344.14	1.37268	0.419551	3.27178	0.00106872	0.00769626
Degs1	2821.39	1.37267	0.195521	7.02057	2.2096e-12	2.05434e-10
Nat2	198.297	1.37236	0.387055	3.54563	0.000391672	0.00342689
Cbr3	873.75	1.36935	0.33092	4.13803	3.50305e-05	0.000464226
Nectin2	2407.46	1.36906	0.160946	8.50636	1.79484e-17	3.77451e-15
Gm5373	129.553	1.3689	0.327492	4.17995	2.91567e-05	0.000402071
Rnf125	76.9557	1.36853	0.424495	3.22391	0.00126454	0.00880842
B3gnt3	1450.13	1.36809	0.448803	3.04831	0.00230133	0.0142159
Serpinb8	521.019	1.36807	0.407883	3.35408	0.000796283	0.00606831
Ccl5	247.826	1.36736	0.462992	2.95332	0.00314375	0.0179432
Gm49331	37.3166	1.36314	0.38288	3.56023	0.000370528	0.00327596
Pinlyp	127.313	1.36091	0.426355	3.19196	0.00141313	0.00962703
Lcmt2	515.175	1.35726	0.211185	6.42687	1.30256e-10	7.90713e-09
Otud1	167.277	1.35698	0.229124	5.92247	3.1715e-09	1.37315e-07
Ly6d	24731.6	1.35648	0.384659	3.52644	0.000421188	0.00364006
Tmem125	303.311	1.355	0.317829	4.2633	2.01427e-05	0.000293824
Igtp	4647.49	1.35492	0.301532	4.49347	7.00713e-06	0.000120998
Rnf113a1	132.94	1.35446	0.183789	7.36968	1.71037e-13	1.96105e-11
Trim13	633.241	1.35223	0.310623	4.35329	1.34112e-05	0.000207997
Smpdl3b	869.878	1.35077	0.226895	5.95329	2.62809e-09	1.16646e-07
Vmn1r65	53.7924	1.35061	0.399592	3.37999	0.000724897	0.0056287
Ctsd	26032.7	1.34841	0.11672	11.5525	7.17029e-31	7.03684e-28
Fzd8	506.72	1.34678	0.194404	6.92774	4.27631e-12	3.66774e-10
Vangl1	2643.08	1.34339	0.303698	4.42342	9.71486e-06	0.000160386
AI464131	525.723	1.34158	0.313112	4.28467	1.83009e-05	0.00027008
Ntf5	368.589	1.33973	0.205721	6.51235	7.39835e-11	4.80485e-09
Crim1	3067.96	1.33952	0.318651	4.20373	2.62557e-05	0.000366987
H2-T10	1510.15	1.33945	0.237574	5.63801	1.72023e-08	6.33079e-07
Fkbpl	240.841	1.33692	0.234328	5.70532	1.16127e-08	4.44024e-07
Ttc22	412.22	1.33635	0.255233	5.2358	1.64268e-07	4.46429e-06
BC030499	33.0691	1.33533	0.43452	3.07312	0.00211831	0.0133262
Fcgbp	5084.65	1.33371	0.446492	2.98708	0.00281654	0.0165761
Fxyd3	7731.01	1.33259	0.224337	5.94013	2.84796e-09	1.25147e-07
Smagp	554.941	1.33259	0.166141	8.02083	1.05035e-15	1.718e-13
Hdhd3	232.033	1.32852	0.237234	5.60005	2.1429e-08	7.74118e-07
Ncmap	168.045	1.32849	0.322302	4.12188	3.75799e-05	0.000493201
Sorcs2	3206.5	1.32739	0.376051	3.52981	0.000415859	0.00360282
Cd274	485.958	1.32661	0.300885	4.40902	1.03841e-05	0.00016922
Cpe	4476.06	1.32655	0.432443	3.06756	0.00215812	0.0135141
Abca12	473.583	1.32609	0.443857	2.98764	0.00281139	0.0165544
Smco4	431.662	1.32554	0.124128	10.6788	1.27857e-26	9.81995e-24
Tacstd2	12030.1	1.32453	0.37746	3.50905	0.000449703	0.00383398
Elovl4	1440.19	1.32065	0.360528	3.66311	0.000249171	0.00237028
Rtl6	200.882	1.32036	0.39146	3.37292	0.000743761	0.00573235
Tpbg	1786.34	1.31967	0.247649	5.32882	9.88552e-08	2.87217e-06
Tspan1	1222.1	1.31824	0.40198	3.27938	0.00104034	0.00752567
Il1a	78.2275	1.31777	0.508302	2.59249	0.00952835	0.0426014
Mrpl46	645.978	1.31662	0.220775	5.96365	2.46661e-09	1.10591e-07
Gm5069	20.1289	1.31128	0.503789	2.60284	0.00924559	0.0416728
Rarb	127.645	1.31107	0.423109	3.09867	0.00194391	0.0124192
Usp18	2707.81	1.30909	0.289965	4.51464	6.34246e-06	0.000110275
Cldn4	19504.4	1.30774	0.391159	3.34325	0.000828032	0.00628046
Efnb2	2178.35	1.3073	0.212974	6.13829	8.34137e-10	4.18609e-08
Ggh	761.374	1.30542	0.277679	4.70116	2.58684e-06	5.06052e-05
Ifi203	1507.93	1.30522	0.336674	3.8768	0.00010584	0.00116273
2024-03-03	407.991	1.30518	0.261104	4.99868	5.77245e-07	1.36239e-05
Spint1	4511.74	1.30365	0.251869	5.17591	2.268e-07	6.01565e-06
Bnc1	305.563	1.30301	0.361778	3.60167	0.000316179	0.00288772
Tmem223	582.411	1.30173	0.404563	3.21761	0.00129262	0.00896863
Tusc1	177.777	1.30094	0.219685	5.92183	3.18375e-09	1.37509e-07
C2cd4b	274.825	1.30054	0.307025	4.23595	2.27585e-05	0.000326488
Nphp1	630.822	1.29632	0.199155	6.50912	7.55899e-11	4.83803e-09
Amigo1	624.809	1.29506	0.38218	3.38861	0.00070249	0.00548876
Btbd11	853.287	1.29371	0.337816	3.82962	0.000128344	0.0013699
Itgb8	1409.55	1.29321	0.372522	3.47149	0.000517584	0.00429053
Alyref2	139.867	1.29276	0.235551	5.48823	4.05973e-08	1.3455e-06
Cradd	356.674	1.29181	0.237477	5.43974	5.33569e-08	1.68614e-06
Akr1b8	2213.19	1.2908	0.321752	4.01179	6.0259e-05	0.000731095
Krt79	9114.73	1.28877	0.474972	2.71337	0.00666033	0.0323139
Rsad2	1897.41	1.2887	0.420955	3.06138	0.00220318	0.0137378
Samd9l	2945	1.28843	0.170591	7.55273	4.26223e-14	5.22864e-12
Khk	206.51	1.28792	0.274962	4.68398	2.81356e-06	5.42001e-05
Mbp	2789.99	1.2858	0.463364	2.77494	0.00552126	0.0279285
Pwwp2b	532.949	1.28468	0.290745	4.41856	9.93598e-06	0.000163135
Gm42715	404.424	1.28462	0.463686	2.77045	0.00559788	0.0281969
Naglu	915.608	1.28357	0.221202	5.8027	6.52536e-09	2.62602e-07
Wnt4	2712.53	1.28207	0.41466	3.09186	0.00198909	0.0126529
Gm5970	89.5869	1.28187	0.459026	2.79258	0.00522894	0.0268515
Mb21d2	438.981	1.28049	0.224635	5.70033	1.19576e-08	4.56222e-07
Map3k1	4737	1.28041	0.381647	3.35496	0.000793774	0.0060518
Slc35f6	2270.57	1.27867	0.304153	4.20404	2.62196e-05	0.000366987
Stat1	14868	1.27654	0.182167	7.00752	2.42575e-12	2.23182e-10
Rab11fip1	3262.65	1.27617	0.294839	4.32838	1.50213e-05	0.000228607
Mad2l1bp	541.956	1.27557	0.184527	6.91266	4.75642e-12	4.0202e-10
Lurap1l	1363.88	1.27114	0.224522	5.66154	1.50016e-08	5.5908e-07
Socs2	1579.7	1.27069	0.222435	5.71262	1.11247e-08	4.28143e-07
Clca3a2	6774.63	1.2698	0.489671	2.59318	0.00950939	0.0425619
Cd5	43.0151	1.26429	0.421739	2.9978	0.00271933	0.016136
Gcnt2	1933.54	1.26263	0.32267	3.91307	9.11315e-05	0.00102169
Gna14	204.137	1.26262	0.270272	4.67166	2.98774e-06	5.71815e-05
Ctsc	5518.86	1.2582	0.297037	4.23584	2.27701e-05	0.000326488
Plac8	2394.77	1.25764	0.383445	3.27985	0.00103863	0.00752178
Plekha7	2439.39	1.256	0.244244	5.1424	2.71254e-07	7.02597e-06
Pdzd4	665.537	1.2547	0.152247	8.24124	1.70439e-16	3.15455e-14
Krt14	48201	1.25335	0.369781	3.38944	0.000700346	0.00547901
Clec11a	786.655	1.24938	0.474613	2.63243	0.00847777	0.0389391
Etnk2	133.446	1.24931	0.412462	3.0289	0.00245447	0.0149254
Ttc12	220.519	1.24865	0.305309	4.0898	4.31749e-05	0.00055307
Trp73	345.607	1.24807	0.29918	4.17162	3.02436e-05	0.000413508
St5	2357.92	1.24576	0.319668	3.89705	9.737e-05	0.00107772
Fdx1l	994.08	1.24489	0.153632	8.10307	5.35876e-16	9.19054e-14
Bloc1s3	458.433	1.24434	0.223012	5.57969	2.40948e-08	8.54687e-07
Il13ra1	3162.81	1.24224	0.2631	4.72156	2.34038e-06	4.63484e-05
Rad51b	134.607	1.24103	0.389628	3.18517	0.00144671	0.00978155
Atg9b	306.788	1.23687	0.316128	3.91255	9.13249e-05	0.00102299
Gpr160	290.927	1.23566	0.426895	2.89454	0.00379719	0.020825
F830016B08Rik	377.125	1.23249	0.255188	4.82975	1.36702e-06	2.92708e-05
Htra1	3738.93	1.23027	0.21004	5.85733	4.70363e-09	1.95505e-07
Rhog	1420.4	1.23013	0.190128	6.46999	9.80077e-11	6.11769e-09
Scin	674.69	1.22835	0.464861	2.64241	0.00823175	0.0381286
Tnfrsf22	248.094	1.22679	0.19383	6.32918	2.46469e-10	1.38218e-08
Kansl1l	1101.57	1.2254	0.214376	5.71615	1.08967e-08	4.22314e-07
Bcl2l14	1529.66	1.22509	0.371369	3.29885	0.000970833	0.00713681
Irak3	418.132	1.22433	0.258501	4.73626	2.17694e-06	4.36004e-05
Man2b2	1496.25	1.22254	0.256	4.77552	1.7924e-06	3.70324e-05
Fam83h	3638.92	1.22032	0.356285	3.42512	0.000614534	0.00494341
Hspa2	1206.39	1.21991	0.177359	6.87817	6.06248e-12	5.00438e-10
3300002I08Rik	56.9638	1.2177	0.302025	4.03177	5.53576e-05	0.000681458
Sil1	1160.46	1.21761	0.123716	9.84205	7.41857e-23	3.36023e-20
Fbxl8	194.013	1.21702	0.22193	5.48379	4.16316e-08	1.37462e-06
Gm14057	42.4031	1.21662	0.368647	3.30023	0.000966057	0.00711948
Mterf4	688.155	1.2164	0.191044	6.36711	1.92625e-10	1.12301e-08
Sdc3	4125.69	1.21409	0.17456	6.95516	3.52168e-12	3.12616e-10
Slc43a2	1421.05	1.21332	0.305208	3.9754	7.02597e-05	0.000827425
Slc52a3	287.477	1.21268	0.301049	4.02819	5.62073e-05	0.000688558
Trp53rkb	141.286	1.21186	0.306188	3.95791	7.56085e-05	0.0008787
Elovl7	1359.96	1.21168	0.320614	3.77926	0.000157296	0.00161361
Avpi1	1755.84	1.2092	0.417282	2.89781	0.00375782	0.0206476
Zfp750	3588.59	1.20647	0.349027	3.45667	0.000546896	0.00450183
Inava	2220.33	1.2063	0.378224	3.18937	0.00142582	0.0096796
Cntfr	2339.77	1.20578	0.456338	2.6423	0.00823439	0.0381286
Gjb4	1305.07	1.20239	0.260984	4.60713	4.08256e-06	7.49672e-05
Tnfrsf11a	463.463	1.20226	0.353398	3.402	0.000668949	0.00527496
Phlda2	117.272	1.20147	0.327015	3.67406	0.00023873	0.00228572
Plekha1	3172.28	1.19976	0.368556	3.25529	0.00113276	0.00808496
Rnd3	3652.68	1.19924	0.340862	3.51827	0.000434376	0.0037394
Pcdhgb2	147.901	1.19846	0.399846	2.99732	0.00272365	0.0161562
Entpd3	206.667	1.19841	0.197304	6.0739	1.24839e-09	5.94416e-08
Pla2g16	1079.29	1.19584	0.188978	6.32795	2.48434e-10	1.3888e-08
Susd6	7851.57	1.19483	0.2184	5.47083	4.47945e-08	1.45459e-06
Gm8752	26.1825	1.19159	0.437389	2.72433	0.00644313	0.0314936
Fmo1	1500.49	1.19159	0.242736	4.90901	9.15391e-07	2.0573e-05
Xaf1	4284.77	1.19138	0.234312	5.0846	3.68405e-07	9.16602e-06
Tbcc	724.811	1.19135	0.126949	9.38451	6.32122e-21	2.27886e-18
Ecscr	712.065	1.19052	0.292217	4.07409	4.61946e-05	0.000583896
Thnsl1	465.197	1.18985	0.270049	4.40605	1.05273e-05	0.000170924
Qsox2	1211.68	1.18965	0.201225	5.91204	3.37892e-09	1.44875e-07
Fam32a	3106.65	1.18898	0.258655	4.59678	4.2906e-06	7.84611e-05
Panx1	525.032	1.18513	0.258978	4.5762	4.7349e-06	8.51752e-05
Hsd3b7	788.854	1.18508	0.170886	6.93491	4.06479e-12	3.55468e-10
Adm2	77.7867	1.18488	0.454414	2.60749	0.00912087	0.0413023
Mfsd13a	322.343	1.18302	0.284247	4.16194	3.15556e-05	0.000426822
Flt3l	274.038	1.18299	0.312969	3.77989	0.000156899	0.00161047
Ahnak	31915	1.18297	0.191497	6.17752	6.51154e-10	3.3341e-08
Pcdhb7	64.4934	1.18119	0.460917	2.56269	0.0103866	0.0454493
Kif26b	2519.23	1.17975	0.296983	3.97243	7.11421e-05	0.000835092
Kctd1	2240.19	1.17899	0.319309	3.69232	0.000222214	0.00215157
Tdrd5	98.8908	1.17874	0.340829	3.45846	0.000543274	0.00447827
Pced1b	181.51	1.17817	0.307415	3.83252	0.000126839	0.00135795
H2-K1	119136	1.17747	0.141631	8.31368	9.27753e-17	1.80096e-14
Ngrn	679.728	1.17568	0.291437	4.03408	5.48171e-05	0.000675746
Pxdc1	2008.13	1.17532	0.404345	2.90672	0.00365237	0.0201559
Nectin1	5571.67	1.17273	0.394966	2.96918	0.00298593	0.017305
Grip2	6215.31	1.17262	0.454764	2.57853	0.0099223	0.0439968
Bcl9l	8779.17	1.17214	0.195233	6.00378	1.92774e-09	8.82217e-08
Apobr	479.436	1.17213	0.457976	2.55937	0.0104863	0.0457838
Rgma	1362.72	1.17152	0.287904	4.06913	4.71895e-05	0.000592889
Plekhf2	1316.28	1.16976	0.322386	3.62845	0.000285126	0.00265552
Ntng2	129.483	1.16948	0.437369	2.67389	0.00749761	0.0353093
Syk	648.752	1.16938	0.285696	4.09309	4.25668e-05	0.00054647
C1galt1	2286.71	1.16927	0.204559	5.71607	1.09015e-08	4.22314e-07
B4galnt4	307.85	1.16889	0.3383	3.45519	0.000549901	0.00452024
Parp10	2747.47	1.16876	0.16385	7.13315	9.81006e-13	9.68127e-11
Riox1	577.263	1.16867	0.164271	7.11428	1.12499e-12	1.09795e-10
Plk3	1770.69	1.16857	0.375413	3.11275	0.0018535	0.0119236
Sdc1	44338.3	1.1655	0.273152	4.26687	1.98236e-05	0.000289647
Irx4	784.39	1.16537	0.461081	2.52747	0.0114887	0.0489149
Acer3	1229.23	1.16383	0.31968	3.64061	0.000271993	0.00255029
Dhx58	2113.15	1.1627	0.199003	5.84262	5.13859e-09	2.10611e-07
Dtx3l	3205.19	1.16095	0.169858	6.83482	8.21073e-12	6.47512e-10
Trmt5	319.833	1.15602	0.17441	6.62816	3.39902e-11	2.35206e-09
Stat2	4868.69	1.15594	0.261138	4.42656	9.57465e-06	0.000158664
Lsm10	501.541	1.15512	0.166609	6.93312	4.11653e-12	3.58219e-10
Ahr	3955.62	1.1548	0.263582	4.3812	1.18028e-05	0.000186349
Eva1a	321.257	1.15461	0.300155	3.8467	0.000119719	0.00129427
Cdh3	3357.22	1.15366	0.375187	3.07489	0.00210582	0.0132807
Birc3	1438.12	1.15327	0.17706	6.51345	7.34465e-11	4.80074e-09
Ifit2	991.434	1.153	0.386801	2.98087	0.0028743	0.0168016
Trim7	433.404	1.15018	0.357536	3.21696	0.00129557	0.00898554
Serpinb9	578.519	1.14788	0.235017	4.88427	1.03815e-06	2.29237e-05
2200002D01Rik	232.233	1.14491	0.307472	3.72361	0.000196391	0.00194138
Btbd19	650.901	1.14479	0.216521	5.28722	1.2419e-07	3.52137e-06
Zfp296	267.824	1.14399	0.241293	4.74108	2.12587e-06	4.27716e-05
Ccdc71l	1054.91	1.14336	0.39056	2.9275	0.00341701	0.0191685
Prickle2	900.893	1.14222	0.332314	3.43717	0.000587835	0.00476991
Vdr	2836.7	1.14158	0.219879	5.19184	2.08221e-07	5.54784e-06
Dyrk3	655.116	1.1389	0.246402	4.62214	3.79798e-06	7.06225e-05
Slc25a28	1226.14	1.13882	0.172249	6.61151	3.80431e-11	2.58474e-09
Arl15	882.292	1.1386	0.236004	4.8245	1.40357e-06	2.98285e-05
Fam83g	1530.15	1.13817	0.254572	4.47093	7.78802e-06	0.000132157
Parp9	3755.52	1.1376	0.165816	6.86063	6.85573e-12	5.55535e-10
Bco2	36.0299	1.13428	0.376371	3.01374	0.00258051	0.0155358
Rhbg	111.448	1.13368	0.430562	2.63303	0.00846265	0.0389156
Fam83b	1847.99	1.13197	0.445952	2.53832	0.0111385	0.0478273
Pnp2	62.7159	1.1318	0.41598	2.7208	0.00651246	0.0317622
Tnfsf13	373.153	1.13092	0.371286	3.04594	0.00231953	0.0142977
Slc22a15	860.862	1.1291	0.4272	2.64302	0.00821711	0.0380985
Tmem265	169.535	1.12465	0.376434	2.98765	0.00281132	0.0165544
BC030870	200.936	1.12379	0.349196	3.21823	0.00128986	0.00895655
Srgap1	548.836	1.12298	0.27339	4.10762	3.99751e-05	0.000518473
Palmd	3520.46	1.12289	0.289683	3.87628	0.000106065	0.00116448
Borcs6	658.05	1.12217	0.163589	6.8597	6.90032e-12	5.56594e-10
Parp14	4049.76	1.12208	0.150088	7.47612	7.65484e-14	8.95515e-12
Gm48498	64.3178	1.12119	0.421948	2.65718	0.00787981	0.0367954
Smoc1	1099.28	1.11874	0.389108	2.87513	0.00403855	0.0218705
Celsr1	1406.71	1.1179	0.336608	3.32108	0.000896692	0.00671568
Ntn4	758.235	1.11726	0.272848	4.09483	4.22482e-05	0.00054317
AI661453	2299.91	1.1155	0.317791	3.51016	0.000447841	0.00382476
Elf3	2706.38	1.11514	0.384385	2.9011	0.00371853	0.0204763
Fzd7	6900.96	1.11487	0.166857	6.68157	2.36391e-11	1.6975e-09
C1rl	173.428	1.11412	0.245678	4.53487	5.76379e-06	0.000101311
Tubgcp6	1087.72	1.11395	0.15652	7.11696	1.1033e-12	1.08277e-10
Ppargc1b	221.155	1.11271	0.355532	3.12969	0.00174989	0.0114078
Entpd2	495.208	1.11197	0.39063	2.84661	0.00441872	0.0234969
Dact2	1676.58	1.11151	0.321358	3.45879	0.000542599	0.0044775
Slc22a4	284.509	1.1112	0.402898	2.75803	0.00581511	0.0290509
Tmem140	879.137	1.11049	0.389657	2.84991	0.00437318	0.0233202
Znhit2	575.594	1.10946	0.279316	3.97207	7.125e-05	0.000835745
Lrrc32	704.333	1.10773	0.315721	3.50856	0.000450541	0.00383617
Zkscan6	720.87	1.10699	0.216186	5.12056	3.04628e-07	7.72336e-06
Nuak1	2066.89	1.10698	0.436687	2.53495	0.0112464	0.0481036
Rbpj	2339.3	1.10631	0.315333	3.50839	0.000450828	0.00383617
Asb8	542.958	1.10599	0.184562	5.99249	2.06654e-09	9.36035e-08
Pik3r1	8365.41	1.10542	0.196626	5.62196	1.88806e-08	6.90528e-07
H2-Q6	16808.8	1.10523	0.26961	4.09937	4.14277e-05	0.000535347
Gsap	446.541	1.10466	0.367216	3.0082	0.00262797	0.0156994
Paox	457.374	1.1037	0.361835	3.05029	0.00228621	0.0141457
Oas1a	2771.55	1.10356	0.20623	5.35111	8.7418e-08	2.60851e-06
Rab32	356.825	1.1024	0.209819	5.25405	1.48789e-07	4.08129e-06
Zfp503	2222.58	1.10131	0.142642	7.72079	1.15614e-14	1.52412e-12
Btbd6	406.104	1.10067	0.219906	5.0052	5.5804e-07	1.32319e-05
Dnase1l2	84.6455	1.09902	0.327505	3.35575	0.000791511	0.00603715
Pdp1	328.566	1.09893	0.343353	3.20058	0.00137153	0.00941627
Sema4d	1562.31	1.0987	0.31788	3.45633	0.000547585	0.0045054
Ucp2	11808.5	1.09761	0.243766	4.50271	6.7091e-06	0.000115965
Naip6	134.458	1.09668	0.313784	3.49502	0.000474023	0.00400268
Smad1	1780.6	1.09643	0.193181	5.67565	1.3816e-08	5.18064e-07
Ece1	7840.04	1.09638	0.312353	3.51008	0.000447972	0.00382476
Sowahb	662.007	1.09474	0.184175	5.94405	2.78069e-09	1.22802e-07
Usp43	440.619	1.09394	0.355467	3.07748	0.00208762	0.0131753
Lynx1	615.858	1.09264	0.269491	4.05447	5.02474e-05	0.000628182
Bst2	5731.52	1.09259	0.301714	3.62128	0.000293143	0.00271809
Rnf225	312.032	1.0923	0.361061	3.02524	0.00248436	0.0150604
Ehf	9677.69	1.09117	0.23502	4.64286	3.43622e-06	6.47822e-05
Slco4a1	54.2473	1.09099	0.388568	2.80773	0.00498921	0.0258914
Abhd17c	1482.31	1.08985	0.356691	3.05546	0.00224719	0.0139482
Lyrm1	85.2161	1.08982	0.307539	3.54367	0.000394597	0.00344736
Lysmd2	892.41	1.08927	0.159426	6.83243	8.3487e-12	6.55465e-10
Ang	356.539	1.08914	0.259779	4.19254	2.75844e-05	0.000381879
Tap1	11033.3	1.08766	0.143635	7.57237	3.66475e-14	4.59133e-12
Vamp5	254.157	1.0874	0.211329	5.14553	2.66773e-07	6.93022e-06
Pelo	566.492	1.08715	0.148921	7.30016	2.87428e-13	3.04037e-11
H2-T23	11490	1.08587	0.170591	6.36532	1.94879e-10	1.12501e-08
Ppl	4202.21	1.08561	0.333777	3.2525	0.00114395	0.00814503
Plxdc1	728.347	1.08419	0.398215	2.72261	0.00647678	0.0316406
Zc3h12a	1366.19	1.08415	0.390702	2.77486	0.00552247	0.0279285
Extl1	1378.52	1.08245	0.276627	3.91301	9.11514e-05	0.00102169
Lipt1	135.473	1.08165	0.376371	2.8739	0.00405438	0.0219224
Slc5a8	1021.8	1.07971	0.287905	3.75021	0.000176686	0.00178047
Sh2d4a	1331.15	1.07942	0.374574	2.88172	0.00395507	0.0214973
1700056E22Rik	48.8104	1.07911	0.381317	2.82996	0.00465535	0.0244389
Casz1	2911.95	1.07901	0.338184	3.19061	0.00141971	0.00965698
Ears2	420.681	1.07855	0.289439	3.72634	0.000194283	0.00192485
Dnajb1	7037.76	1.07835	0.233331	4.62156	3.80874e-06	7.07481e-05
Car13	1938.92	1.07726	0.407104	2.64616	0.00814112	0.0377858
Faap100	933.741	1.07691	0.120468	8.93936	3.91421e-19	1.04764e-16
Gsdmd	614.358	1.07599	0.293533	3.66565	0.000246715	0.00234818
Runx1	5510.11	1.07515	0.194072	5.53994	3.02576e-08	1.03585e-06
Mrm3	274.023	1.07513	0.158105	6.80014	1.04519e-11	8.09794e-10
Zfp579	493.211	1.07477	0.225793	4.75999	1.936e-06	3.96746e-05
Klf13	3810.56	1.07446	0.254069	4.229	2.34733e-05	0.00033494
Commd5	639.978	1.07431	0.27195	3.95041	7.80177e-05	0.000898424
Gpr157	172.545	1.07391	0.312595	3.43547	0.000591529	0.00479109
Mtus1	1664.1	1.0737	0.227578	4.71795	2.38234e-06	4.70212e-05
Slc16a3	2660.42	1.07308	0.263118	4.07831	4.5365e-05	0.000577358
Iqck	42.4051	1.07277	0.339902	3.15612	0.00159884	0.0106139
Knop1	2077.72	1.07123	0.320576	3.34159	0.00083301	0.00631009
Ttc30a1	143.444	1.06944	0.283296	3.775	0.000160007	0.00163666
Arrdc4	1449.04	1.06845	0.241683	4.42087	9.83024e-06	0.000161837
Pramef8	389.946	1.06562	0.209207	5.09359	3.51351e-07	8.7788e-06
D16Ertd472e	789.04	1.06372	0.251632	4.22727	2.36539e-05	0.000337245
Fam13a	899.779	1.06095	0.400826	2.6469	0.00812333	0.037743
Epas1	2836.92	1.06024	0.404478	2.62126	0.00876066	0.0399786
Fam241a	185.838	1.05834	0.34235	3.0914	0.00199213	0.0126627
Fzd4	344.493	1.05815	0.283656	3.73039	0.000191185	0.00189735
Acadl	5995.19	1.05813	0.280048	3.7784	0.000157841	0.00161826
Parm1	2785.42	1.05777	0.303221	3.48845	0.000485829	0.00408439
Sncaip	137.79	1.05728	0.406739	2.5994	0.00933882	0.0420199
Cln8	1163.85	1.05638	0.276777	3.81673	0.000135234	0.00143135
Pex11a	444.766	1.05633	0.374485	2.82076	0.004791	0.0250245
Chid1	1139.65	1.05599	0.21843	4.83446	1.33509e-06	2.87608e-05
Zfp747	188.12	1.05444	0.39328	2.68114	0.00733716	0.0347203
Wdr91	992.162	1.054	0.205707	5.12381	2.99427e-07	7.61063e-06
Hspa1b	32952	1.05252	0.372254	2.82742	0.00469244	0.0246116
Plxnb2	10784.8	1.05212	0.0894829	11.7578	6.44139e-32	8.12765e-29
Plch2	6754.61	1.05211	0.279068	3.77009	0.000163189	0.00166151
Adgrl2	4703.79	1.05197	0.217871	4.82843	1.37616e-06	2.93784e-05
Ggta1	1097.99	1.05119	0.244878	4.29269	1.76521e-05	0.000261817
Lgals3	12640.5	1.04939	0.400726	2.61872	0.00882606	0.0402251
Spsb1	1927.27	1.04662	0.347835	3.00895	0.00262149	0.0156839
Casp4	236.686	1.04574	0.240975	4.33961	1.42734e-05	0.000219633
Fadd	407.969	1.0447	0.204231	5.11528	3.1328e-07	7.9285e-06
Metrnl	732.938	1.04271	0.314592	3.31449	0.000918112	0.00683649
Lgals7	10480.5	1.04268	0.26389	3.95121	7.77564e-05	0.000897169
Gm10778	102.595	1.04208	0.264581	3.93862	8.19524e-05	0.000933391
Hk2	4698.25	1.04181	0.379789	2.74312	0.00608588	0.0300887
Tnf	1155.58	1.04083	0.395572	2.63122	0.00850799	0.0390474
Gbp9	887.434	1.04068	0.307864	3.38032	0.000724017	0.00562435
Dhrs3	2972.89	1.03977	0.261964	3.96914	7.21331e-05	0.000842746
Shf	1302.31	1.03869	0.141695	7.33046	2.29366e-13	2.48574e-11
Gm48119	96.5072	1.0357	0.24811	4.17438	2.98801e-05	0.000409577
Bbc3	340.758	1.03394	0.204266	5.06173	4.15461e-07	1.01932e-05
Zfp97	343.689	1.03366	0.376229	2.74743	0.00600645	0.0298045
Cd24a	20310.5	1.03346	0.33968	3.04245	0.00234658	0.0144132
Arntl2	657.236	1.03316	0.273746	3.77415	0.000160557	0.00164019
Rdh14	570.128	1.03068	0.207401	4.96948	6.71342e-07	1.54821e-05
Ampd3	514.206	1.03023	0.336011	3.06605	0.00216906	0.013573
Ppil6	23.2019	1.02884	0.399845	2.5731	0.0100793	0.0445797
Rnasek	1780.05	1.02852	0.151557	6.78637	1.14987e-11	8.79325e-10
Slc7a11	386.686	1.02725	0.359868	2.85451	0.00431035	0.0230385
Itpripl1	610.752	1.02681	0.142055	7.22824	4.89278e-13	5.03712e-11
Zfp748	205.278	1.02594	0.222769	4.60543	4.11622e-06	7.55069e-05
Rfesd	256.288	1.02586	0.310874	3.29993	0.000967082	0.00712406
Tspan8	1065.56	1.02493	0.369103	2.77681	0.00548956	0.0278019
Atp6v0a4	266.298	1.02433	0.368145	2.7824	0.00539586	0.0274612
Smoc2	835.199	1.024	0.323451	3.16586	0.00154624	0.0103151
Gprin3	200.64	1.02277	0.399978	2.55707	0.0105558	0.045996
Rnasel	397.771	1.02203	0.253344	4.03417	5.47959e-05	0.000675746
Frat2	110.615	1.02016	0.321312	3.17498	0.00149849	0.0100611
Arhgef37	235.978	1.01952	0.251597	4.0522	5.07378e-05	0.000632522
Map3k8	466.953	1.019	0.305089	3.34002	0.000837728	0.00633767
Ccdc51	338.056	1.0189	0.193585	5.26332	1.41474e-07	3.92947e-06
Prr15	115.24	1.01797	0.363689	2.79901	0.00512591	0.0264609
Sdcbp2	224.001	1.01731	0.341239	2.98123	0.00287096	0.0167988
Nuak2	417.319	1.01685	0.309351	3.28704	0.00101247	0.00735717
Porcn	691.047	1.01584	0.248024	4.09573	4.20839e-05	0.000541846
Insl6	683.485	1.01505	0.26065	3.89429	9.84874e-05	0.00108736
Gm3604	43.463	1.0145	0.348817	2.90841	0.00363276	0.0200853
Sertad4	2013.78	1.01358	0.224387	4.51712	6.26853e-06	0.000109205
Gdpgp1	153.73	1.01162	0.363232	2.78505	0.00535193	0.0273252
Xdh	3385.78	1.01085	0.164587	6.1417	8.16408e-10	4.10879e-08
Tmem102	538.74	1.01013	0.303583	3.32737	0.000876703	0.00658739
Stk11	4128.14	1.00919	0.169395	5.95762	2.55943e-09	1.13885e-07
Ckap4	6102.24	1.00915	0.211156	4.77917	1.76018e-06	3.64948e-05
Tle1	1912.23	1.00881	0.19305	5.22562	1.73571e-07	4.69546e-06
Zfp628	579.177	1.00809	0.170201	5.92291	3.16293e-09	1.3728e-07
Tppp3	987.064	1.00741	0.363546	2.77107	0.00558728	0.0281596
Fhl2	2478.35	1.00556	0.389977	2.57851	0.00992262	0.0439968
Spryd4	294.671	1.00302	0.220755	4.54361	5.52977e-06	9.76833e-05
Gch1	852.954	1.0019	0.210668	4.75582	1.97641e-06	4.03622e-05
Tmem40	1015.39	1.00034	0.262015	3.81787	0.00013461	0.00142645
Rad51	294.184	-1.00131	0.335601	-2.98363	0.00284855	0.0167119
Rora	426.957	-1.0031	0.298139	-3.36453	0.00076674	0.00587867
P2rx7	736.128	-1.0067	0.248115	-4.05738	4.96269e-05	0.000621304
Me2	424.193	-1.00699	0.354374	-2.84159	0.0044889	0.0238199
Cfap126	68.9971	-1.00924	0.29299	-3.44462	0.000571854	0.00466381
Spire1	794.445	-1.00956	0.189473	-5.32828	9.91479e-08	2.87594e-06
Pdk3	406.384	-1.01546	0.288624	-3.51828	0.000434357	0.0037394
Rftn2	207.582	-1.01682	0.394919	-2.57474	0.0100315	0.0444125
Psip1	1788.87	-1.01883	0.230719	-4.41589	1.00594e-05	0.000164842
Tgfb3	1996.87	-1.01952	0.24912	-4.09248	4.2679e-05	0.000547115
Lhfp	733.171	-1.02207	0.310484	-3.29186	0.00099526	0.00726205
Copz2	486.414	-1.02637	0.337132	-3.04441	0.00233135	0.0143483
Rftn1	367.27	-1.02919	0.405665	-2.53705	0.0111792	0.0479205
Pheta2	113.043	-1.033	0.397755	-2.59708	0.00940212	0.0422402
Cep112	181.876	-1.03313	0.328505	-3.14493	0.00166129	0.0109625
Angptl2	2357.67	-1.03438	0.230319	-4.49107	7.08668e-06	0.000122014
Cnn3	9175.71	-1.03577	0.202918	-5.10437	3.31894e-07	8.36364e-06
Gm10182	468.547	-1.03599	0.374897	-2.76341	0.0057201	0.0286817
Bub1b	975.498	-1.03793	0.40169	-2.58392	0.00976856	0.0434336
Pcdhgc3	2749.78	-1.04343	0.283391	-3.68194	0.000231469	0.00222586
Ndp	77.7243	-1.04387	0.378593	-2.75724	0.00582911	0.0291126
Fads1	1733.54	-1.04698	0.380811	-2.74933	0.00597163	0.0296734
Ikbip	737.955	-1.04778	0.314799	-3.32841	0.000873443	0.00656848
Usp2	156.961	-1.0501	0.399671	-2.62741	0.00860383	0.0394054
Magef1	71.3736	-1.05275	0.3906	-2.6952	0.00703455	0.0336398
Spc25	227.971	-1.05401	0.384633	-2.74029	0.00613843	0.0302977
Ahcy	4285.66	-1.05531	0.353688	-2.98374	0.00284753	0.0167115
Creb3l2	1745.65	-1.05575	0.238384	-4.42877	9.47738e-06	0.0001572
2810021J22Rik	141.746	-1.05796	0.271834	-3.89193	9.94482e-05	0.00109592
Dixdc1	194.354	-1.05851	0.301764	-3.50775	0.000451909	0.00384351
Anxa6	6403.81	-1.05998	0.30425	-3.48391	0.000494146	0.00413897
BC055324	197.503	-1.06229	0.350309	-3.03244	0.00242585	0.0147972
Cenpk	95.6477	-1.06296	0.394479	-2.69459	0.00704748	0.0336925
Sgsm1	237.414	-1.06475	0.386923	-2.75184	0.00592608	0.0294885
Carns1	41.5481	-1.06542	0.394273	-2.70225	0.00688728	0.0331148
Dcbld2	587.476	-1.06589	0.204265	-5.21817	1.80704e-07	4.88093e-06
Acot7	1015.04	-1.06698	0.317497	-3.36058	0.000777793	0.00595309
Cpne5	69.3507	-1.06804	0.322815	-3.30851	0.000937923	0.00695859
Ccna2	917.935	-1.06861	0.411898	-2.59437	0.0094765	0.0424772
Acad12	133.46	-1.06891	0.295856	-3.61293	0.000302758	0.00278843
Nrip2	85.4732	-1.07467	0.299357	-3.58993	0.000330771	0.00299798
Cthrc1	127.115	-1.07487	0.325593	-3.30125	0.000962551	0.00710316
Gna12	2989.73	-1.07512	0.156654	-6.863	6.7429e-12	5.4891e-10
Pcsk5	860.549	-1.07686	0.329238	-3.27075	0.00107264	0.00772134
Pcdhb16	112.217	-1.07723	0.231898	-4.64525	3.39658e-06	6.41032e-05
Adamts17	258.14	-1.0811	0.359459	-3.00757	0.00263347	0.0157216
Vwf	305.526	-1.08311	0.382533	-2.83142	0.00463424	0.0243787
Ccsap	65.7366	-1.08349	0.39208	-2.76343	0.00571967	0.0286817
Ypel4	31.7796	-1.0909	0.424387	-2.57053	0.0101543	0.044828
Fzd3	533.298	-1.09146	0.284634	-3.83459	0.000125775	0.00134983
Map2	1418.26	-1.09218	0.379586	-2.87729	0.0040111	0.0217525
Fmnl3	974.232	-1.09539	0.312678	-3.50326	0.000459604	0.00390145
Hist1h2be	58.1956	-1.09646	0.298148	-3.67756	0.000235475	0.00225824
B4galt2	376.028	-1.09671	0.32049	-3.422	0.000621633	0.0049847
Antxr1	2755	-1.09731	0.390097	-2.81291	0.00490954	0.025553
Ttll3	175.702	-1.09757	0.36512	-3.00605	0.00264664	0.0157842
Top2a	3357.17	-1.09983	0.400162	-2.74846	0.00598759	0.0297359
Rab23	332.804	-1.1019	0.273537	-4.02834	5.6172e-05	0.000688558
Tpx2	1170.27	-1.1034	0.413292	-2.66977	0.00759028	0.0356697
Slc35f3	174.643	-1.10385	0.425431	-2.59467	0.00946831	0.0424512
Ttc28	546.752	-1.10412	0.375621	-2.93944	0.00328802	0.0186103
Golm1	691.252	-1.10616	0.34434	-3.2124	0.00131632	0.00910447
Myh10	1358.78	-1.10782	0.293947	-3.76879	0.000164043	0.00166733
Lmnb1	1481.32	-1.10894	0.339751	-3.26397	0.00109862	0.00788907
Faim2	290.392	-1.10978	0.433053	-2.56269	0.0103864	0.0454493
Ripor1	785.924	-1.11162	0.200392	-5.54725	2.90202e-08	9.97358e-07
Zc3hav1l	193.845	-1.11261	0.25319	-4.39439	1.11083e-05	0.000178005
Ccnd2	4579.28	-1.11307	0.212144	-5.24678	1.54777e-07	4.22586e-06
Rbmx	642.788	-1.11411	0.253086	-4.4021	1.07208e-05	0.000173111
Cetn4	49.3134	-1.11736	0.435064	-2.56828	0.0102205	0.0450464
Larp6	111.626	-1.11771	0.443764	-2.51871	0.0117786	0.0497773
Sgtb	98.5412	-1.11901	0.310358	-3.60555	0.000311498	0.00285554
Lhfpl2	1265.67	-1.122	0.247876	-4.52644	5.99843e-06	0.000104809
Mtbp	545.375	-1.12724	0.36718	-3.06998	0.00214071	0.0134288
Chtf18	275.651	-1.13093	0.359378	-3.14692	0.00165002	0.0109126
Pgf	851.752	-1.13459	0.419038	-2.70762	0.00677682	0.0327226
Cdkn3	134.517	-1.13608	0.370739	-3.06437	0.00218126	0.0136252
Fndc5	76.0639	-1.13757	0.429625	-2.64782	0.00810132	0.0376605
Igflr1	26.574	-1.14058	0.399257	-2.85677	0.00427983	0.0229111
Gm7240	31.2386	-1.14638	0.354908	-3.23007	0.00123758	0.00865818
Melk	461.148	-1.14861	0.430996	-2.665	0.00769885	0.036103
Gm14305	145.658	-1.15191	0.257274	-4.47737	7.55695e-06	0.000128979
Atad2	580.029	-1.15282	0.398244	-2.89477	0.00379438	0.020816
Zfp664	3938.29	-1.15504	0.27355	-4.22242	2.41698e-05	0.000343491
Gpm6b	608.354	-1.15656	0.291509	-3.96751	7.26282e-05	0.000847969
Anln	1656.46	-1.15796	0.360954	-3.20807	0.00133629	0.00920765
A4galt	87.4339	-1.15887	0.3885	-2.98292	0.00285512	0.0167283
Ccdc18	157.297	-1.15932	0.240073	-4.82904	1.37196e-06	2.93411e-05
Phgdh	1993.1	-1.15955	0.281063	-4.1256	3.69763e-05	0.000486002
Mmab	330.59	-1.15977	0.267063	-4.34267	1.4076e-05	0.000216974
Mpdz	845.018	-1.16007	0.330575	-3.50926	0.000449358	0.00383398
Ropn1l	28.4241	-1.16064	0.398571	-2.912	0.00359118	0.0198991
Arhgap19	293.627	-1.16168	0.323107	-3.59535	0.000323961	0.00294216
Plxnd1	1577.84	-1.16248	0.385758	-3.01349	0.00258264	0.0155389
Rfc4	265.886	-1.1625	0.35906	-3.23763	0.00120528	0.0084995
Cdk14	527.007	-1.16361	0.243533	-4.77802	1.77032e-06	3.6662e-05
Ccnb1	858.945	-1.16362	0.392605	-2.96386	0.00303808	0.0175099
Gm48368	386.101	-1.16454	0.364495	-3.19493	0.00139863	0.0095562
S1pr1	138.789	-1.16544	0.409279	-2.84754	0.00440591	0.023457
Eva1b	607.539	-1.16965	0.311167	-3.75891	0.000170658	0.00172563
Ndc80	318.26	-1.16996	0.455821	-2.5667	0.0102671	0.0451392
Fam111a	307.412	-1.17067	0.457001	-2.56164	0.0104178	0.0455634
Cyp39a1	357.336	-1.17211	0.23566	-4.97371	6.56834e-07	1.52204e-05
Pbx3	295.443	-1.1724	0.385141	-3.04408	0.00233389	0.0143552
Rhobtb3	446	-1.17756	0.269334	-4.37213	1.23043e-05	0.00019218
Cenpp	86.1263	-1.17812	0.385393	-3.05694	0.00223611	0.0139035
Pfkfb1	55.9707	-1.17922	0.355981	-3.31259	0.000924362	0.0068782
Maged1	7335.6	-1.18078	0.242604	-4.86712	1.13238e-06	2.46653e-05
Etv1	166.558	-1.18182	0.42463	-2.78317	0.0053831	0.0274042
Lrrc75b	555.35	-1.18276	0.35034	-3.37603	0.000735395	0.0056927
D130040H23Rik	39.2612	-1.18372	0.469773	-2.51977	0.0117433	0.0496875
Ccdc102a	496.907	-1.18414	0.354828	-3.33721	0.000846227	0.00638829
Itga5	1905.38	-1.18433	0.330319	-3.58543	0.000336529	0.00303305
Aldh7a1	2155.08	-1.19356	0.248247	-4.80796	1.5248e-06	3.21045e-05
Syde1	379.651	-1.19383	0.393891	-3.03087	0.00243853	0.014851
Plch1	56.2696	-1.19644	0.370883	-3.22592	0.00125568	0.00875358
Phactr1	472.968	-1.19687	0.396068	-3.02188	0.00251208	0.0152024
Gm9864	178.863	-1.19748	0.343179	-3.48937	0.000484161	0.0040766
Cenpa	821.866	-1.19832	0.422339	-2.83736	0.00454889	0.024062
Atp10d	509.308	-1.19952	0.253359	-4.73446	2.19642e-06	4.38912e-05
Tns1	1168.76	-1.20196	0.422648	-2.84388	0.0044568	0.0236709
Nf1	1592.5	-1.2021	0.380259	-3.16127	0.00157084	0.0104594
Recql4	132.793	-1.20409	0.372657	-3.23109	0.00123321	0.00863782
Rusc2	416.832	-1.20951	0.370939	-3.26067	0.00111148	0.0079588
Tbc1d31	389.43	-1.21761	0.414201	-2.93965	0.00328583	0.0186039
Sh2d5	167.06	-1.21831	0.471669	-2.58298	0.0097952	0.0435192
Cldn2	150.46	-1.22143	0.415976	-2.93629	0.00332165	0.0187766
Zfp773	173.367	-1.22157	0.4844	-2.52182	0.011675	0.0495289
Abcg2	244.219	-1.2236	0.226788	-5.39535	6.83891e-08	2.11511e-06
2210016L21Rik	523.191	-1.22682	0.221085	-5.54909	2.87154e-08	9.90737e-07
Fam117a	215.703	-1.22942	0.301831	-4.07322	4.63669e-05	0.000585264
Tbx18	108.044	-1.23139	0.470817	-2.61543	0.00891142	0.0405513
Neto2	262.534	-1.23163	0.30897	-3.98624	6.7128e-05	0.000795849
Mterf1b	29.2435	-1.23444	0.410322	-3.00847	0.00262567	0.015691
Kctd7	134.111	-1.23529	0.458267	-2.69557	0.00702692	0.0336215
Nrp2	558.451	-1.23818	0.309872	-3.99578	6.4481e-05	0.000772242
Atp13a3	4144.11	-1.2386	0.326328	-3.79558	0.000147299	0.00152971
Slc15a1	90.7572	-1.24064	0.478592	-2.59227	0.00953443	0.0426015
Spsb4	133.937	-1.24477	0.470261	-2.64697	0.00812175	0.037743
Fam229b	33.2886	-1.24727	0.494165	-2.52399	0.0116032	0.0492719
Rps6kl1	50.3101	-1.24997	0.396916	-3.14919	0.00163722	0.0108401
Mtss1	7679.63	-1.25023	0.485348	-2.57595	0.00999644	0.0442907
Hmmr	610.172	-1.25229	0.37479	-3.34131	0.000833837	0.00631364
Rps6ka2	180.452	-1.25398	0.333991	-3.75452	0.000173674	0.00175212
Uhrf1	1514.31	-1.25445	0.401091	-3.12759	0.00176248	0.0114759
Mipol1	121.175	-1.25672	0.331203	-3.79442	0.000147991	0.00153528
Bgn	8823.87	-1.25732	0.438196	-2.86931	0.00411373	0.0221958
Il17d	88.1732	-1.25795	0.358146	-3.51239	0.000444099	0.00380229
Tbc1d16	713.581	-1.25934	0.253221	-4.97329	6.58274e-07	1.52204e-05
Efnb3	49.3323	-1.25961	0.499762	-2.52041	0.0117217	0.0496436
Cyth3	1127.64	-1.26052	0.267846	-4.70613	2.52464e-06	4.9553e-05
Usp28	491.802	-1.26404	0.296534	-4.2627	2.01974e-05	0.000294379
Hspg2	11175.6	-1.26569	0.24718	-5.12049	3.04737e-07	7.72336e-06
Reck	287.426	-1.2667	0.286955	-4.4143	1.01339e-05	0.000165602
Myef2	913.335	-1.26706	0.236286	-5.3624	8.21255e-08	2.47146e-06
Pcdhgc5	134.057	-1.26871	0.497191	-2.55176	0.0107181	0.0464701
Sapcd2	155.527	-1.27086	0.337476	-3.76578	0.000166031	0.00168559
Syne3	141.313	-1.27183	0.354535	-3.58733	0.000334086	0.00301719
Tacc1	1145.96	-1.27245	0.383309	-3.31964	0.00090133	0.00673024
Phldb1	1381.99	-1.27309	0.360603	-3.53045	0.000414855	0.00359765
Rassf6	555.599	-1.27455	0.315035	-4.04574	5.21591e-05	0.00064841
Glrb	51.9893	-1.27489	0.4496	-2.8356	0.00457392	0.0241383
Tcf4	3287.55	-1.27606	0.231344	-5.51583	3.47144e-08	1.16142e-06
Col16a1	10795.4	-1.27732	0.467794	-2.73053	0.00632332	0.0310196
Atp6v1b1	1274.48	-1.27905	0.397468	-3.21799	0.0012909	0.00896023
Tcf7l1	410.516	-1.27981	0.408644	-3.13184	0.00173712	0.0113611
Cyp1b1	827.939	-1.27992	0.447495	-2.86018	0.00423396	0.0227334
Slit3	1129.45	-1.28058	0.425388	-3.01037	0.00260926	0.0156511
Col14a1	2568.93	-1.28183	0.503768	-2.54448	0.0109439	0.0471522
Dlgap5	589.285	-1.2834	0.396016	-3.24077	0.00119208	0.0084266
Ncapg	387.689	-1.28545	0.340575	-3.77435	0.000160423	0.00163997
Fez1	219.225	-1.28572	0.428553	-3.00013	0.00269861	0.0160272
Pyroxd2	210.606	-1.28676	0.326179	-3.94495	7.98163e-05	0.000913184
Prex1	1058.09	-1.28691	0.407388	-3.15894	0.00158345	0.0105315
Chst10	49.0922	-1.2872	0.503697	-2.5555	0.0106035	0.0461472
Ppp1r9a	239.787	-1.29001	0.284726	-4.53069	5.87914e-06	0.000102929
Hist2h2be	85.4128	-1.29213	0.424259	-3.04562	0.00232205	0.0143073
Fblim1	998.726	-1.29324	0.38639	-3.34697	0.000816994	0.00620899
Gm10499	108.618	-1.29599	0.354101	-3.65995	0.000252261	0.00239499
Pde4dip	587.965	-1.29669	0.379411	-3.41763	0.000631683	0.00504233
Ttc7b	154.738	-1.29754	0.47332	-2.74135	0.0061187	0.0302172
Gm10282	103.539	-1.29765	0.406756	-3.19024	0.00142153	0.00966561
Snn	541.111	-1.29904	0.296966	-4.37437	1.21786e-05	0.000190554
Bub1	335.713	-1.29922	0.439232	-2.95795	0.00309696	0.0177392
Nusap1	555.756	-1.30217	0.449514	-2.89684	0.00376937	0.0206982
Eme1	108.236	-1.30341	0.368344	-3.53857	0.000402303	0.00350601
Slc7a5	1976.11	-1.30426	0.264538	-4.93032	8.20931e-07	1.86878e-05
Hectd2	401.129	-1.30519	0.322933	-4.04166	5.30742e-05	0.000657934
Cit	380.656	-1.3101	0.3622	-3.61705	0.000297974	0.00275123
B3glct	323.028	-1.31054	0.212236	-6.17494	6.6188e-10	3.37922e-08
Ect2	502.778	-1.31335	0.335972	-3.90911	9.26381e-05	0.00103507
Ccnf	314.858	-1.31457	0.383117	-3.43126	0.00060079	0.00485275
Sec23a	1194.5	-1.31655	0.250226	-5.26145	1.42924e-07	3.94494e-06
Kif20a	1227.33	-1.31849	0.453359	-2.90826	0.00363445	0.0200884
Papln	1538.02	-1.32109	0.353175	-3.74062	0.000183568	0.00183616
Tmsb10	6614.18	-1.32256	0.37769	-3.5017	0.000462296	0.00392174
Cspg4	612.821	-1.32312	0.506764	-2.61092	0.00902987	0.040969
Tgfbr3	1260.48	-1.32314	0.474293	-2.78971	0.00527553	0.0270515
Stk39	1585.41	-1.32627	0.262068	-5.06079	4.17519e-07	1.02295e-05
Scml2	77.691	-1.3277	0.372373	-3.5655	0.000363162	0.00322537
Gpsm1	308.479	-1.32875	0.415901	-3.19487	0.00139894	0.0095562
Spats1	93.9617	-1.32902	0.366877	-3.62251	0.000291756	0.00270687
Sema3e	105.021	-1.33369	0.350833	-3.8015	0.000143823	0.00150082
Adgrg3	306.044	-1.33409	0.51225	-2.60438	0.00920401	0.0415336
Hs3st6	545.515	-1.33446	0.360497	-3.70173	0.000214135	0.00208642
Ska2	293.969	-1.33617	0.289926	-4.60866	4.05271e-06	7.46518e-05
Ube2c	874.522	-1.33627	0.44789	-2.98347	0.00285002	0.0167138
Adcy7	993.319	-1.34111	0.440297	-3.04592	0.00231968	0.0142977
Ska1	106.668	-1.3419	0.51587	-2.60124	0.00928868	0.0418263
Pclaf	748.437	-1.34239	0.33706	-3.98264	6.81543e-05	0.000806934
Igfbp3	12285.1	-1.34533	0.509897	-2.63844	0.00832879	0.038485
Serpinh1	11735.6	-1.34741	0.414009	-3.25453	0.0011358	0.00809682
Limd2	1161.73	-1.35144	0.27185	-4.97124	6.65245e-07	1.53615e-05
Prr11	340.544	-1.35163	0.364666	-3.70648	0.000210156	0.0020556
Scarf1	64.748	-1.35249	0.314978	-4.29392	1.75546e-05	0.00026059
Adgrl3	427.085	-1.35276	0.349045	-3.87561	0.00010636	0.00116626
Ttc9	155.172	-1.35472	0.431625	-3.13865	0.00169729	0.0111377
Hip1	720.026	-1.35493	0.392473	-3.45228	0.000555865	0.00456078
Cul7	1524.01	-1.35609	0.30614	-4.42965	9.4387e-06	0.000157001
Spa17	50.5249	-1.35703	0.450293	-3.01365	0.00258124	0.0155358
Nynrin	379.597	-1.35864	0.438247	-3.10016	0.00193415	0.0123742
Ror2	597.169	-1.35929	0.390595	-3.48005	0.000501318	0.00418515
Adig	66.068	-1.35993	0.373698	-3.6391	0.00027359	0.00256119
Slc5a3	365.036	-1.36484	0.300094	-4.54805	5.41453e-06	9.57434e-05
Cdc7	308.498	-1.37138	0.330658	-4.14742	3.36245e-05	0.000448114
Atp1b2	79.3849	-1.37529	0.33388	-4.1191	3.80348e-05	0.00049843
Mical1	696.386	-1.37582	0.443808	-3.10004	0.00193491	0.0123742
Cotl1	3522.51	-1.3826	0.47905	-2.88612	0.00390023	0.0212712
Pde7b	276.059	-1.38264	0.398985	-3.46539	0.000529455	0.00437662
Pdgfrl	321.255	-1.38338	0.363696	-3.80367	0.000142567	0.00148933
Col8a2	410.26	-1.38426	0.382551	-3.6185	0.000296313	0.00273896
Efemp2	1074.2	-1.38792	0.348099	-3.98715	6.68721e-05	0.000793882
Gamt	80.2583	-1.38938	0.42213	-3.29135	0.000997078	0.00726924
Tbc1d24	239.986	-1.39554	0.276679	-5.04388	4.56188e-07	1.10543e-05
Ociad2	724.665	-1.39614	0.322304	-4.33176	1.47923e-05	0.000225848
Slc26a11	209.366	-1.39778	0.173709	-8.04667	8.50755e-16	1.40454e-13
Gja4	38.8415	-1.39937	0.534032	-2.62039	0.00878282	0.040059
Dgkh	302.442	-1.40083	0.1947	-7.1948	6.25501e-13	6.35028e-11
Fkbp7	225.674	-1.40444	0.413428	-3.39707	0.000681121	0.00534943
Abca5	436.211	-1.40539	0.33798	-4.1582	3.20764e-05	0.000432212
Cbx7	298.247	-1.40636	0.480532	-2.92668	0.00342601	0.0191946
Itga9	557.556	-1.40691	0.390163	-3.60595	0.000311018	0.00285261
Ephb2	626.967	-1.40739	0.31445	-4.47572	7.61554e-06	0.000129479
Serpine1	1148.78	-1.40745	0.547534	-2.57052	0.0101546	0.044828
Bin1	634.29	-1.40776	0.369028	-3.81477	0.000136308	0.00143926
Rasef	349.56	-1.4082	0.348944	-4.0356	5.44623e-05	0.000672781
R3hdml	1013.42	-1.4094	0.510222	-2.76233	0.005739	0.0287673
Chn2	109.765	-1.41005	0.500282	-2.81852	0.00482463	0.0251704
Cdca8	664.882	-1.41129	0.418181	-3.37484	0.000738588	0.00570492
Tmem98	329.183	-1.41227	0.36528	-3.86627	0.000110513	0.00120507
Rapgef3	33.0184	-1.41303	0.422461	-3.34477	0.000823516	0.00624889
Layn	136.47	-1.41394	0.522322	-2.70702	0.00678907	0.0327585
Nsl1	168.871	-1.41596	0.413486	-3.42444	0.00061607	0.00495126
Jdp2	592.005	-1.4205	0.367739	-3.8628	0.000112096	0.00122083
Ramp2	150.149	-1.42242	0.485444	-2.93013	0.00338817	0.0190612
Kntc1	464.556	-1.42367	0.431495	-3.29938	0.000968981	0.00712969
Ngef	268.84	-1.42714	0.290285	-4.91634	8.81753e-07	1.98676e-05
Csn3	3353.05	-1.42779	0.490142	-2.91301	0.00357969	0.0198478
Kcnn4	687.517	-1.42994	0.340044	-4.20516	2.60902e-05	0.000365491
Fetub	24.2256	-1.4316	0.549806	-2.60382	0.00921905	0.0415763
Rida	384.989	-1.4363	0.307135	-4.67644	2.91893e-06	5.59857e-05
Pla2r1	180.276	-1.43653	0.34561	-4.1565	3.23155e-05	0.00043477
Il17rd	265.434	-1.43666	0.28373	-5.06346	4.11717e-07	1.01295e-05
Tmem56	2328.51	-1.43862	0.442624	-3.25022	0.00115316	0.00819413
Cdc20	1048.12	-1.44013	0.418385	-3.44212	0.000577169	0.00469847
Aqp5	2084.04	-1.45034	0.382395	-3.79277	0.000148976	0.0015444
Gpr153	1932.4	-1.45194	0.346152	-4.19452	2.73453e-05	0.000378866
Itgb3	1044.02	-1.45422	0.292753	-4.9674	6.78575e-07	1.56232e-05
Fyn	730.355	-1.45533	0.488537	-2.97896	0.00289231	0.0168734
Dchs2	285.738	-1.45565	0.344149	-4.22971	2.33989e-05	0.000334148
Map1b	1369.52	-1.46537	0.319907	-4.58061	4.63617e-06	8.35694e-05
Limk1	911.292	-1.46747	0.274779	-5.34056	9.26587e-08	2.73258e-06
Cavin2	359.737	-1.46779	0.520237	-2.82139	0.00478159	0.0249868
Dmxl2	184.852	-1.47223	0.45892	-3.20804	0.00133645	0.00920765
Fbln2	5473.9	-1.47584	0.571018	-2.58458	0.00974988	0.0433942
Cd59b	47.1614	-1.47613	0.375405	-3.93208	8.42129e-05	0.000954214
Hacd1	96.1812	-1.47685	0.586204	-2.51935	0.0117573	0.0497348
Ucn2	78.7341	-1.47688	0.308692	-4.78433	1.71555e-06	3.56114e-05
Renbp	498.641	-1.47733	0.405127	-3.6466	0.000265738	0.00250494
Fkbp5	546.261	-1.48002	0.348722	-4.24413	2.19439e-05	0.000316648
Col9a2	2502.74	-1.48099	0.552654	-2.67978	0.00736695	0.0348381
Kitl	1455.4	-1.4851	0.40786	-3.64121	0.000271365	0.0025458
Stc1	116.381	-1.48584	0.388915	-3.82049	0.000133189	0.00141394
Plekhh2	751.271	-1.48858	0.178532	-8.33788	7.5637e-17	1.50127e-14
Lamc1	7489.39	-1.48883	0.321811	-4.62642	3.72046e-06	6.93963e-05
Egfl7	183.586	-1.48939	0.495465	-3.00605	0.00264664	0.0157842
Wnk4	257.017	-1.49504	0.344829	-4.33559	1.45368e-05	0.00022291
Hhipl2	264.485	-1.50092	0.444486	-3.37674	0.000733494	0.00568297
Col8a1	810.227	-1.50117	0.595647	-2.52024	0.0117275	0.0496441
Fkbp11	294.466	-1.50158	0.412312	-3.64186	0.00027068	0.00254203
Pdia5	379.371	-1.50164	0.226507	-6.62957	3.36671e-11	2.34145e-09
Tuba1a	5046.61	-1.5049	0.362469	-4.1518	3.29863e-05	0.000441777
Dlc1	553.247	-1.50547	0.433464	-3.47312	0.000514446	0.00427188
Tpst1	624.693	-1.50567	0.347484	-4.33306	1.47048e-05	0.000225096
Lpcat1	696.667	-1.50741	0.36632	-4.11501	3.87166e-05	0.000505118
Ddah1	178.109	-1.50823	0.406727	-3.70821	0.000208726	0.00204728
Arhgap6	189.792	-1.51115	0.344919	-4.38117	1.18043e-05	0.000186349
Glipr2	453.832	-1.5117	0.520755	-2.9029	0.00369725	0.0203845
Dusp18	249.24	-1.51197	0.269264	-5.61519	1.96348e-08	7.1368e-07
Foxi1	283.261	-1.51226	0.418927	-3.60984	0.000306388	0.00281453
Zfp334	173.17	-1.51247	0.36466	-4.14762	3.35944e-05	0.000448114
Dcdc2a	451.282	-1.51305	0.466461	-3.24368	0.00117997	0.00835208
Igf1	208.253	-1.51514	0.53078	-2.85456	0.00430962	0.0230385
Ripor2	191.207	-1.51652	0.469061	-3.2331	0.00122455	0.00859425
Oacyl	50.8451	-1.51708	0.552076	-2.74796	0.00599671	0.0297729
Armc2	30.2485	-1.51739	0.519694	-2.91977	0.00350295	0.0195142
Cxcl12	1179.97	-1.52073	0.386534	-3.93427	8.34494e-05	0.000947995
Fkbp14	518.193	-1.52432	0.39769	-3.83295	0.000126617	0.00135639
Upk1b	86.277	-1.52933	0.598727	-2.55431	0.01064	0.0462488
Mras	809.877	-1.52958	0.33959	-4.50419	6.6626e-06	0.000115387
Stc2	4100.45	-1.53019	0.323695	-4.72726	2.27572e-06	4.52709e-05
Skp2	282.585	-1.53162	0.301975	-5.07203	3.936e-07	9.738e-06
Ccnb2	984.824	-1.53257	0.426974	-3.58938	0.000331465	0.00300273
Ccdc92	339.743	-1.53408	0.294987	-5.2005	1.98748e-07	5.32759e-06
Asb1	254.853	-1.53603	0.255873	-6.00309	1.93591e-09	8.83667e-08
Ulbp1	102.023	-1.53611	0.35078	-4.37913	1.19155e-05	0.000187433
Slc9a3r2	758.667	-1.54065	0.302001	-5.10147	3.3702e-07	8.4807e-06
Hspa12a	199.178	-1.54597	0.426279	-3.62666	0.000287112	0.00266798
Dio2	552.242	-1.54805	0.42532	-3.63973	0.00027292	0.00255628
Stard9	472.199	-1.553	0.419228	-3.70444	0.000211857	0.00206994
Rap1gap	600.245	-1.5539	0.35137	-4.4224	9.76086e-06	0.000160845
Ctla2a	69.1882	-1.55841	0.529059	-2.94562	0.00322304	0.0183129
Rpl3	10108.6	-1.55906	0.545856	-2.85617	0.00428783	0.022939
Ncald	225.343	-1.56129	0.382015	-4.08698	4.37016e-05	0.000559412
Tgfb1i1	697.714	-1.56834	0.522476	-3.00175	0.00268432	0.0159605
Colca2	167.943	-1.56845	0.544499	-2.88053	0.00397001	0.0215653
Cdh5	123.702	-1.57272	0.587524	-2.67687	0.00743143	0.035035
Tdrkh	32.9754	-1.57296	0.586438	-2.68222	0.00731344	0.0346452
Ccdc8	262.76	-1.57658	0.437385	-3.60456	0.000312686	0.00286493
Cpt1c	307.478	-1.57839	0.422113	-3.73925	0.000184572	0.00184416
Tmlhe	176.332	-1.58114	0.215001	-7.3541	1.92213e-13	2.12215e-11
H1fx	210.844	-1.58217	0.368976	-4.288	1.80291e-05	0.000266514
Gramd1b	321.031	-1.5828	0.513782	-3.08069	0.00206521	0.0130619
Emid1	2042.64	-1.58516	0.565729	-2.80198	0.00507895	0.0262645
Plekhb1	618.06	-1.58602	0.488963	-3.24365	0.0011801	0.00835208
Amot	425.018	-1.58621	0.248642	-6.37947	1.77696e-10	1.03941e-08
Nacad	32.5969	-1.58626	0.617023	-2.57082	0.0101458	0.0448176
AA414768	56.8535	-1.58834	0.626022	-2.5372	0.0111744	0.0479205
Abhd8	432.165	-1.58921	0.375002	-4.23787	2.25648e-05	0.000324071
St6galnac6	348.641	-1.59042	0.480505	-3.30988	0.000933344	0.00693336
Agps	4572.64	-1.59231	0.372384	-4.27599	1.90286e-05	0.00027965
Col27a1	1200.95	-1.59303	0.418226	-3.80903	0.000139513	0.00146871
Wipf1	523.471	-1.59466	0.57385	-2.77887	0.00545476	0.0276574
Slc1a1	314.374	-1.59975	0.379094	-4.21992	2.44392e-05	0.000346907
Ppic	1958.34	-1.60142	0.400458	-3.99897	6.36178e-05	0.000763457
Ckb	374.249	-1.60197	0.629948	-2.54302	0.01099	0.047316
Sema4g	365.088	-1.60496	0.497349	-3.22704	0.0012508	0.00872644
Zfp354a	71.6148	-1.60581	0.473248	-3.39317	0.000690881	0.00541456
Tie1	62.067	-1.60587	0.50321	-3.19125	0.0014166	0.00963951
Plpp1	251.253	-1.6097	0.418131	-3.84975	0.000118239	0.00128377
Gm16574	14.0218	-1.61153	0.551456	-2.92231	0.0034744	0.0194103
Fam20c	903.265	-1.61214	0.451592	-3.5699	0.000357118	0.00318289
Ankrd6	87.8684	-1.61261	0.485068	-3.32451	0.000885744	0.0066412
Adgrf5	175.789	-1.61468	0.472386	-3.41815	0.000630489	0.00503735
Ptger3	78.2113	-1.61697	0.399843	-4.044	5.25462e-05	0.000652305
Cep170	786.863	-1.61856	0.367161	-4.40831	1.04179e-05	0.000169592
Abat	258.509	-1.62199	0.515465	-3.14665	0.00165152	0.0109157
Igfbp4	5562.35	-1.62218	0.34222	-4.74016	2.13549e-06	4.29163e-05
Tspan7	612.907	-1.6229	0.424787	-3.82051	0.000133178	0.00141394
Svep1	946.618	-1.62792	0.416651	-3.90716	9.33867e-05	0.0010408
Uggt2	188.473	-1.63177	0.367503	-4.44015	8.98979e-06	0.000150241
Wscd2	58.1972	-1.63326	0.532802	-3.06542	0.00217365	0.013592
Adra2a	255.838	-1.63427	0.527581	-3.09768	0.00195045	0.0124517
Grb14	982.748	-1.63436	0.372113	-4.39211	1.12255e-05	0.000179294
Oaf	1723.92	-1.63479	0.271426	-6.02297	1.71244e-09	7.9189e-08
2024-09-11	2091.27	-1.64125	0.235066	-6.98207	2.90855e-12	2.59493e-10
Mylk	964.763	-1.64333	0.59617	-2.75647	0.00584285	0.0291647
Tnfrsf26	50.6019	-1.64595	0.366396	-4.49229	7.04626e-06	0.000121516
Ankle1	96.8716	-1.64717	0.381961	-4.31239	1.615e-05	0.000243213
Fn1	21429.4	-1.64856	0.577698	-2.85368	0.00432165	0.0230919
Chrd	57.1843	-1.64906	0.537615	-3.06737	0.0021595	0.0135179
Penk	158.745	-1.64956	0.577646	-2.85565	0.00429485	0.0229696
Tmem47	326.247	-1.65026	0.358161	-4.60758	4.07377e-06	7.48836e-05
Cxcl14	2271.92	-1.65662	0.469221	-3.53058	0.000414646	0.00359761
Bicc1	666.942	-1.66136	0.300026	-5.53738	3.07032e-08	1.04503e-06
Cacna2d1	243.687	-1.66212	0.390501	-4.25638	2.0776e-05	0.00030132
Stat5a	3290.07	-1.66639	0.337267	-4.94086	7.77803e-07	1.77289e-05
Sparc	24357.8	-1.66752	0.415877	-4.00965	6.08089e-05	0.000736756
Ngf	90.9701	-1.66924	0.568579	-2.93581	0.00332676	0.0187995
Fam171b	182.344	-1.67103	0.536332	-3.11565	0.00183538	0.0118285
Fads6	200.304	-1.67208	0.372448	-4.48944	7.14104e-06	0.000122711
Mtcl1	157.574	-1.67531	0.478177	-3.50354	0.000459119	0.00390107
Mtss1l	863.848	-1.67798	0.388973	-4.31388	1.60413e-05	0.000241782
Dbn1	1428.83	-1.68298	0.358849	-4.68993	2.73296e-06	5.28781e-05
Fxyd2	941.177	-1.68354	0.464556	-3.62398	0.000290108	0.00269441
B4galt5	354.482	-1.68536	0.498678	-3.37966	0.000725757	0.00563291
F2r	863.483	-1.68795	0.34679	-4.86737	1.13092e-06	2.46639e-05
Rps6ka6	153.457	-1.68844	0.4969	-3.39794	0.000678945	0.00533759
Mttp	190.86	-1.69121	0.380661	-4.44282	8.87878e-06	0.000148949
Agpat4	146.436	-1.69403	0.570757	-2.96804	0.00299709	0.0173367
Fgl1	63.3404	-1.69807	0.588987	-2.88304	0.00393857	0.0214266
Olfml3	2058.52	-1.70028	0.435313	-3.90588	9.38825e-05	0.00104567
Fat4	364.395	-1.70459	0.341254	-4.99508	5.88129e-07	1.37972e-05
Arhgef25	763.125	-1.70676	0.316491	-5.39276	6.93818e-08	2.13153e-06
Man1c1	606.775	-1.70785	0.261129	-6.54026	6.141e-11	4.04779e-09
Olfr1023	98.6706	-1.70948	0.441858	-3.86885	0.000109348	0.00119384
Col5a1	9580.03	-1.71823	0.56912	-3.01911	0.00253521	0.0153158
Hvcn1	205.112	-1.71949	0.635823	-2.70436	0.00684356	0.0329674
Vash2	98.7792	-1.72532	0.479821	-3.59575	0.000323454	0.0029392
Hist1h2bj	13.2496	-1.7273	0.636003	-2.71586	0.00661038	0.0321068
Tbx2	746.631	-1.72828	0.468961	-3.68534	0.000228395	0.00220109
Rgl3	186.764	-1.73013	0.592295	-2.92106	0.00348848	0.019452
Lrrc73	37.9743	-1.73097	0.57397	-3.01578	0.00256315	0.0154586
Ubash3b	198.112	-1.73191	0.566653	-3.05639	0.00224021	0.0139147
Chst3	198.911	-1.73338	0.498458	-3.47748	0.000506147	0.00421948
4930503L19Rik	184.748	-1.73457	0.532924	-3.25482	0.00113464	0.00809184
Tmsb15l	40.0878	-1.73862	0.611747	-2.84205	0.00448238	0.0237996
Sv2c	275.635	-1.7388	0.514185	-3.38167	0.000720468	0.0056017
P3h3	1316.46	-1.74094	0.403397	-4.31569	1.59104e-05	0.000240014
Purg	104.982	-1.74892	0.357144	-4.89696	9.73293e-07	2.17361e-05
Magee1	210.734	-1.75153	0.438605	-3.9934	6.51325e-05	0.000777524
Hdgfl3	165.67	-1.75342	0.4948	-3.54369	0.000394565	0.00344736
Map4k1	250.961	-1.75541	0.532522	-3.29641	0.00097928	0.00718695
Armcx6	126.608	-1.75584	0.459967	-3.81732	0.000134909	0.00142875
Gli2	217.934	-1.76054	0.501704	-3.50912	0.000449599	0.00383398
Otx1	56.5816	-1.76196	0.544367	-3.23672	0.00120912	0.00851639
Epha7	504.081	-1.76465	0.379687	-4.64764	3.35759e-06	6.3503e-05
Rasl11b	215.453	-1.76513	0.342397	-5.15522	2.53329e-07	6.60037e-06
Gulp1	117.751	-1.76585	0.542117	-3.25733	0.00112467	0.00804669
Fbxl7	132.076	-1.76822	0.537373	-3.2905	0.0010001	0.0072804
Lix1l	1016.52	-1.77199	0.385966	-4.59106	4.40991e-06	8.00627e-05
Zfp354c	262.715	-1.77247	0.352612	-5.0267	4.98996e-07	1.20092e-05
Adamts14	272.708	-1.7726	0.556524	-3.18513	0.00144688	0.00978155
Itga2b	212.966	-1.77872	0.321153	-5.53854	3.04995e-08	1.04212e-06
Dnase1	49.3947	-1.78051	0.366534	-4.85769	1.18761e-06	2.57729e-05
P3h1	1296.86	-1.78612	0.332058	-5.37894	7.49275e-08	2.27032e-06
Zc4h2	102.404	-1.78839	0.492556	-3.63084	0.000282498	0.00263342
Plat	2075.4	-1.78868	0.389363	-4.59387	4.35096e-06	7.92368e-05
Serp2	37.7301	-1.79045	0.606291	-2.95312	0.00314582	0.0179435
Esam	48.0544	-1.80406	0.473945	-3.80647	0.000140965	0.00148047
Ttyh2	1203.38	-1.80662	0.249054	-7.25393	4.04852e-13	4.20689e-11
Adamts10	724.998	-1.80946	0.289274	-6.25517	3.9708e-10	2.15166e-08
Kdelr3	729.833	-1.81034	0.37631	-4.81075	1.50363e-06	3.16965e-05
Nek3	63.3086	-1.81195	0.392289	-4.61892	3.85742e-06	7.13522e-05
Spon2	719.423	-1.81246	0.504408	-3.59324	0.000326597	0.00296167
Col25a1	193.956	-1.81575	0.520115	-3.49105	0.000481131	0.00405302
Sox18	51.1769	-1.81786	0.675595	-2.69076	0.00712895	0.0340543
Fermt2	1951.28	-1.81855	0.352102	-5.16482	2.40672e-07	6.31718e-06
Shc2	182.361	-1.82014	0.413386	-4.40301	1.06761e-05	0.000172547
Brdt	83.4191	-1.82105	0.504562	-3.60917	0.00030718	0.00282034
Zfp965	34.2075	-1.82819	0.484189	-3.77577	0.000159512	0.00163255
Zfp9	243.998	-1.83101	0.435764	-4.20183	2.64765e-05	0.000369438
Lamb1	6081.89	-1.83114	0.257646	-7.1072	1.18418e-12	1.14937e-10
Hlf	150.071	-1.83471	0.409208	-4.48357	7.34055e-06	0.000125772
Fut4	73.162	-1.83716	0.458846	-4.00388	6.23117e-05	0.000752898
Gm13889	71.2267	-1.84046	0.461114	-3.99132	6.57055e-05	0.00078319
Kcnma1	65.9433	-1.84188	0.447251	-4.11822	3.81814e-05	0.00049998
Stac2	1143.34	-1.85195	0.427572	-4.33132	1.48215e-05	0.000226099
Kcnk2	110.477	-1.85209	0.50659	-3.65599	0.000256187	0.00242397
Gdf11	110.02	-1.85245	0.368759	-5.02345	5.07508e-07	1.21643e-05
Ugt8a	79.055	-1.85262	0.469435	-3.94649	7.9304e-05	0.000909678
Mamdc2	135.729	-1.85818	0.607878	-3.05684	0.00223684	0.0139035
Hs3st3b1	161.774	-1.86004	0.731957	-2.54119	0.0110475	0.0475288
Areg	3258.53	-1.86345	0.46785	-3.98301	6.8047e-05	0.000806204
Armcx1	240.472	-1.86383	0.438972	-4.24589	2.17726e-05	0.000314741
Adamts7	500.898	-1.86443	0.421353	-4.42485	9.65076e-06	0.000159489
Begain	239.623	-1.86518	0.457938	-4.073	4.64117e-05	0.000585264
Cpxm1	1325.83	-1.8685	0.466791	-4.00287	6.25779e-05	0.000755081
Gper1	34.1017	-1.86965	0.504279	-3.70757	0.000209261	0.00204926
Pnldc1	56.938	-1.87018	0.596285	-3.13639	0.00171041	0.0112071
Fv1	56.324	-1.87111	0.366246	-5.10889	3.24058e-07	8.17783e-06
Sdk1	440.834	-1.87477	0.556376	-3.36961	0.000752743	0.00578643
Nkain1	64.4967	-1.87717	0.381458	-4.92103	8.60878e-07	1.94468e-05
Scamp5	308.057	-1.8872	0.248356	-7.59878	2.98936e-14	3.79906e-12
Gpx7	428.72	-1.88929	0.438324	-4.31025	1.63067e-05	0.000245155
Cldn5	44.9535	-1.89321	0.508292	-3.72465	0.00019559	0.00193562
Mlf1	65.1309	-1.8939	0.525631	-3.6031	0.000314444	0.00287806
Rbpms2	96.2255	-1.8983	0.607556	-3.12448	0.0017812	0.0115637
Katnal2	30.7262	-1.89909	0.550578	-3.44927	0.000562114	0.00459631
Grb10	1595.75	-1.90062	0.347224	-5.47375	4.40613e-08	1.43958e-06
Map9	130.268	-1.90109	0.675322	-2.81508	0.0048765	0.0254185
Soat1	543.02	-1.90318	0.481747	-3.95058	7.7961e-05	0.000898357
Dpf1	30.5109	-1.90466	0.575721	-3.30831	0.000938611	0.00696078
Slc43a1	45.4899	-1.90896	0.439318	-4.34528	1.39097e-05	0.000215162
Gm49395	24.824	-1.91112	0.644187	-2.96672	0.00300996	0.0173932
Lama4	2284.21	-1.91274	0.390814	-4.89424	9.86872e-07	2.19715e-05
Runx1t1	93.3667	-1.91569	0.55548	-3.44871	0.000563262	0.0046001
Tbkbp1	198.131	-1.91701	0.513719	-3.73162	0.000190251	0.00189234
Spry1	980.316	-1.92118	0.360273	-5.33258	9.68297e-08	2.83664e-06
Mpp3	48.6745	-1.92405	0.503384	-3.82222	0.000132253	0.00140569
Nrep	1497.4	-1.92452	0.45035	-4.27338	1.92535e-05	0.000282486
Dock10	323.834	-1.92563	0.573415	-3.35819	0.000784561	0.0059919
Plscr4	118.524	-1.92565	0.400025	-4.81382	1.48073e-06	3.12884e-05
Tmem86a	502.051	-1.9292	0.758831	-2.54234	0.0110114	0.0473852
Nrk	332.295	-1.93178	0.363847	-5.30933	1.10029e-07	3.1553e-06
Myl9	1194.26	-1.93512	0.642053	-3.01396	0.00257863	0.0155358
Tspan18	311.458	-1.93655	0.607329	-3.18864	0.00142943	0.00969321
Faxc	251.209	-1.93942	0.348644	-5.56276	2.6554e-08	9.30708e-07
Ccdc170	83.2545	-1.94075	0.478706	-4.05417	5.03131e-05	0.000628558
Mxra8	978.44	-1.94173	0.368643	-5.26724	1.38487e-07	3.85862e-06
Serpinf1	3429.53	-1.94233	0.475972	-4.08077	4.48863e-05	0.000572503
Sema3b	1218.53	-1.94649	0.519442	-3.74727	0.000178771	0.00179738
Fbln5	687.889	-1.94801	0.501404	-3.8851	0.000102287	0.00112579
As3mt	164.073	-1.94834	0.423497	-4.6006	4.21284e-06	7.71189e-05
Dock5	1511.25	-1.94903	0.226941	-8.58829	8.82742e-18	1.97388e-15
Serpine2	5243.01	-1.95115	0.357219	-5.46205	4.70656e-08	1.51441e-06
Lama1	1074.05	-1.95126	0.744204	-2.62194	0.00874301	0.0399186
Pde3b	93.6574	-1.95134	0.717826	-2.7184	0.00655977	0.0319488
Tagln	1772.63	-1.95381	0.632142	-3.09078	0.0019963	0.012676
Slc2a10	122.259	-1.95529	0.627508	-3.11597	0.00183343	0.0118203
Tmem119	778.608	-1.95803	0.580539	-3.37277	0.000744149	0.00573284
1700012B07Rik	14.2022	-1.9592	0.703716	-2.78408	0.00536802	0.0273589
Cnih2	148.9	-1.96051	0.530897	-3.69282	0.000221785	0.00215066
Sardh	570.933	-1.96051	0.526381	-3.72451	0.000195699	0.00193562
Trpm3	327.262	-1.96466	0.648358	-3.0302	0.00244388	0.0148661
Hspa12b	119.907	-1.96624	0.629446	-3.12376	0.00178557	0.0115836
Col3a1	87558.9	-1.96715	0.649517	-3.02863	0.00245665	0.0149335
Rbm20	236.92	-1.96895	0.442721	-4.44738	8.69241e-06	0.0001461
Tril	2013.2	-1.9697	0.419787	-4.69215	2.70353e-06	5.2366e-05
Hpse2	98.2496	-1.97029	0.601682	-3.27464	0.00105797	0.00762503
Vim	9354.9	-1.97321	0.51808	-3.8087	0.000139699	0.0014698
Nxpe4	71.9762	-1.975	0.626333	-3.15327	0.00161451	0.0107058
Cpxm2	680.562	-1.98038	0.480249	-4.12365	3.72919e-05	0.000489786
Ndst4	110.697	-1.98159	0.556527	-3.56064	0.00036995	0.00327249
Kcnd1	96.5612	-1.98176	0.576162	-3.43958	0.000582621	0.00474067
Twist1	467.581	-1.98227	0.452463	-4.38105	1.18108e-05	0.000186349
C1qtnf6	1847.66	-1.9863	0.388694	-5.11018	3.21847e-07	8.13367e-06
Enpep	136.187	-1.98869	0.712409	-2.7915	0.00524646	0.0269263
Rmdn2	112.773	-1.98966	0.497581	-3.99867	6.37003e-05	0.000763928
Tead2	1321.35	-1.98968	0.310231	-6.41354	1.42176e-10	8.51372e-09
Nrp1	801.677	-1.9902	0.581592	-3.42199	0.000621642	0.0049847
Col23a1	472.963	-1.99451	0.453754	-4.39557	1.1048e-05	0.000177422
BC028528	121.896	-1.99503	0.681409	-2.9278	0.00341375	0.0191652
Pou2af1	510.217	-1.99701	0.606017	-3.2953	0.000983169	0.0072095
Saa3	266.121	-2.0007	0.641227	-3.12011	0.00180781	0.011685
Tmod2	83.9267	-2.00115	0.578919	-3.45671	0.000546818	0.00450183
Tspan6	415.885	-2.00378	0.413019	-4.85154	1.22505e-06	2.64554e-05
Col9a1	836.164	-2.00393	0.716356	-2.79739	0.00515168	0.0265474
En1	51.9479	-2.00959	0.608055	-3.30495	0.000949931	0.00703291
Col12a1	2855.12	-2.01275	0.528862	-3.80581	0.000141338	0.0014812
Nrg1	221.149	-2.01472	0.563962	-3.57243	0.00035368	0.00316182
Tnnt1	11.7303	-2.01479	0.76251	-2.64231	0.00823422	0.0381286
Lonrf3	48.4552	-2.01528	0.469697	-4.2906	1.78194e-05	0.000263856
Cd93	192.531	-2.0158	0.674875	-2.98692	0.00281799	0.0165767
Edil3	398.229	-2.01674	0.279021	-7.22792	4.90452e-13	5.03712e-11
Scarf2	872.814	-2.0181	0.396572	-5.08885	3.60235e-07	8.97538e-06
Dpysl2	265.757	-2.02634	0.437822	-4.62822	3.68819e-06	6.88709e-05
Zcwpw1	123.678	-2.03329	0.495607	-4.10262	4.08494e-05	0.000528648
Ripk3	383.391	-2.03515	0.520832	-3.90749	9.32587e-05	0.00104003
P2ry12	44.2734	-2.03725	0.798946	-2.54992	0.0107746	0.046598
Unc5b	1199.05	-2.04237	0.373013	-5.47535	4.3665e-08	1.43106e-06
Rgs16	251.722	-2.04239	0.685406	-2.97982	0.00288413	0.0168535
Gm7162	17.6393	-2.04941	0.613897	-3.33837	0.000842716	0.00636497
Etv4	1059.47	-2.05148	0.397556	-5.16024	2.4663e-07	6.45441e-06
Stk10	435.598	-2.05185	0.382782	-5.36038	8.3049e-08	2.495e-06
Etv5	1587.48	-2.06232	0.349081	-5.90785	3.46595e-09	1.47532e-07
Arhgef9	153.537	-2.06725	0.564665	-3.66102	0.000251211	0.00238711
Cmklr1	523.032	-2.06887	0.456472	-4.5323	5.83459e-06	0.000102453
Slc5a5	346.449	-2.07247	0.622561	-3.32894	0.000871756	0.00655859
Pgr	1593.75	-2.07396	0.451911	-4.58931	4.44715e-06	8.05732e-05
Exoc3l4	260.577	-2.08003	0.426904	-4.87237	1.1027e-06	2.41378e-05
Itih5	2774.76	-2.08744	0.385653	-5.41274	6.20692e-08	1.93378e-06
Wfdc3	248.965	-2.09135	0.647045	-3.23216	0.0012286	0.0086158
Spon1	1766.99	-2.09368	0.397523	-5.26682	1.38809e-07	3.86151e-06
Emcn	23.9069	-2.09485	0.676882	-3.09486	0.00196907	0.0125482
Radil	109.69	-2.09946	0.726647	-2.88924	0.0038617	0.0210936
Sema6c	174.274	-2.10065	0.431125	-4.87248	1.10207e-06	2.41378e-05
Sorbs1	91.8977	-2.10104	0.376439	-5.58135	2.38656e-08	8.49973e-07
Map1a	334.351	-2.11217	0.486906	-4.33795	1.43818e-05	0.000220725
Cdo1	2083.08	-2.11704	0.30223	-7.00475	2.47424e-12	2.25953e-10
Cilp	844.427	-2.12189	0.651465	-3.25711	0.00112554	0.00804968
Cfap74	36.6128	-2.12756	0.668909	-3.18064	0.00146948	0.00991533
Il1rl1	107.753	-2.12791	0.715237	-2.97512	0.00292876	0.0170523
Itga8	845.016	-2.13165	0.391214	-5.44882	5.07054e-08	1.61973e-06
Pth1r	160.331	-2.13171	0.577618	-3.69052	0.000223799	0.00216388
Gypc	146.372	-2.13568	0.528576	-4.04044	5.33519e-05	0.000660912
Nkd1	147.815	-2.15294	0.53916	-3.99314	6.52051e-05	0.00077775
Pycr1	229.117	-2.15843	0.293209	-7.36141	1.81982e-13	2.02183e-11
Casc4	586.406	-2.1593	0.37687	-5.72956	1.00694e-08	3.95282e-07
Enox1	134.971	-2.16142	0.405851	-5.32565	1.00594e-07	2.91311e-06
Sspo	64.9557	-2.16443	0.591424	-3.65968	0.000252527	0.00239575
Wasf1	104.266	-2.16443	0.491462	-4.40407	1.0624e-05	0.000172019
Dppa2	107.709	-2.16809	0.566016	-3.83043	0.000127918	0.00136619
Slit2	917.738	-2.16964	0.375716	-5.77469	7.70955e-09	3.07425e-07
Mgp	1894.08	-2.17067	0.47585	-4.56167	5.07484e-06	9.0279e-05
Pdgfra	1597.13	-2.17083	0.442693	-4.90368	9.40562e-07	2.10851e-05
M1ap	21.3673	-2.17203	0.78099	-2.78112	0.00541711	0.0275218
Gm266	92.6757	-2.17571	0.529888	-4.10598	4.02598e-05	0.000521782
Adcy4	67.1001	-2.17586	0.531219	-4.09597	4.20411e-05	0.00054169
Sstr2	45.8604	-2.178	0.70872	-3.07314	0.00211816	0.0133262
Adcyap1r1	213.49	-2.17964	0.609632	-3.57533	0.000349783	0.00313332
Cdr2l	688.994	-2.18593	0.336844	-6.48945	8.61492e-11	5.39654e-09
Epb41l3	989.247	-2.18597	0.395704	-5.52426	3.30882e-08	1.11546e-06
St6galnac4	373.327	-2.18871	0.495622	-4.41609	1.00501e-05	0.000164842
Cited1	2148.26	-2.18939	0.533804	-4.10149	4.10491e-05	0.000530844
Lepr	68.0143	-2.19092	0.664218	-3.29849	0.000972048	0.00714277
Amhr2	31.9655	-2.1962	0.618495	-3.55087	0.000383958	0.00337276
Rnf144a	316.717	-2.20213	0.349037	-6.30917	2.80534e-10	1.55349e-08
Cdh11	1832.94	-2.20325	0.359254	-6.13284	8.63258e-10	4.29562e-08
Zfp286	49.3409	-2.20774	0.470026	-4.69706	2.63929e-06	5.14603e-05
C130074G19Rik	208.636	-2.20929	0.429042	-5.14935	2.61386e-07	6.80028e-06
Nhsl2	298.189	-2.21499	0.619281	-3.57671	0.00034795	0.00311849
2024-09-06	518.851	-2.21698	0.310319	-7.14421	9.05139e-13	8.98274e-11
Dgki	99.1125	-2.21749	0.531148	-4.1749	2.9812e-05	0.000409191
Stard13	559.698	-2.22289	0.33829	-6.57096	4.99912e-11	3.33243e-09
Bex2	32.6503	-2.22306	0.81993	-2.71128	0.00670244	0.0324559
Ccdc80	3987.53	-2.22485	0.549154	-4.05141	5.09093e-05	0.000634212
Rnft2	63.8066	-2.22906	0.527454	-4.22607	2.3781e-05	0.000338783
Clmp	378.101	-2.23348	0.53201	-4.19818	2.69066e-05	0.000374552
Pcp4	525.388	-2.23384	0.602798	-3.70579	0.000210731	0.00206008
Adamts2	1691.96	-2.23451	0.601013	-3.71791	0.000200876	0.00198129
Cd4	102.987	-2.24424	0.671541	-3.34192	0.000832008	0.0063079
Hunk	389.912	-2.2451	0.516752	-4.34463	1.39512e-05	0.000215615
Ecm2	114.997	-2.24548	0.576838	-3.89274	9.91183e-05	0.00109296
Pkdcc	380.714	-2.25038	0.499649	-4.50391	6.6713e-06	0.000115425
Sema3g	154.798	-2.25074	0.822711	-2.73576	0.00622361	0.0306411
Mns1	232.457	-2.25151	0.630677	-3.56999	0.000356997	0.00318289
Rassf2	553.875	-2.25326	0.696673	-3.23431	0.00121938	0.00857158
Sparcl1	1974.08	-2.25352	0.614448	-3.66755	0.00024489	0.00233458
Gm16485	227.58	-2.25716	0.521924	-4.3247	1.52738e-05	0.000231796
Gng2	423.711	-2.25841	0.602713	-3.74707	0.00017891	0.00179775
Raver2	123.113	-2.25933	0.452441	-4.99365	5.92496e-07	1.38628e-05
Dnm1	950.427	-2.25947	0.451892	-5.00003	5.73227e-07	1.35556e-05
Armcx4	628.727	-2.26079	0.321928	-7.02265	2.17692e-12	2.04549e-10
9130230L23Rik	138.788	-2.2615	0.523738	-4.31799	1.57459e-05	0.000238143
Gnat2	16.2771	-2.26442	0.814154	-2.78132	0.00541381	0.0275129
Ggt7	132.296	-2.2651	0.514192	-4.40516	1.05705e-05	0.000171344
Tfpi2	182.098	-2.26545	0.511984	-4.42484	9.65152e-06	0.000159489
Fbln7	793.351	-2.26551	0.455376	-4.97503	6.52387e-07	1.51438e-05
Nfatc4	353.706	-2.26551	0.441956	-5.12609	2.95818e-07	7.55149e-06
Tmem35a	36.9333	-2.27112	0.750938	-3.02438	0.00249142	0.0150981
Pde10a	115.706	-2.2723	0.525167	-4.32682	1.51281e-05	0.000229783
Peg3	913.019	-2.27684	0.344916	-6.60115	4.07983e-11	2.75077e-09
Thsd1	164.113	-2.28111	0.348875	-6.53846	6.21538e-11	4.08159e-09
Col1a2	57487.7	-2.28596	0.569173	-4.01628	5.91231e-05	0.00071929
Apold1	73.0843	-2.28826	0.728947	-3.13913	0.00169448	0.0111243
Pcdh19	323.107	-2.28866	0.543657	-4.20974	2.55668e-05	0.000359297
Gm960	20.2916	-2.28963	0.583526	-3.92379	8.71667e-05	0.000984527
Srpx2	221.353	-2.2903	0.443621	-5.16275	2.43354e-07	6.37812e-06
Gpc3	350.111	-2.29242	0.649387	-3.53013	0.00041536	0.00360027
Cacna1g	1196.67	-2.29918	0.420109	-5.47281	4.42946e-08	1.44366e-06
Maged2	1671.99	-2.30818	0.350433	-6.58664	4.49881e-11	3.01028e-09
Cbx6	2030.28	-2.30919	0.41657	-5.54333	2.96766e-08	1.01794e-06
Dpysl5	193.014	-2.31385	0.683338	-3.3861	0.000708936	0.0055242
Ctsk	2090.38	-2.31553	0.582431	-3.97562	7.01957e-05	0.000827223
Olfm1	504.159	-2.31951	0.518237	-4.47577	7.61353e-06	0.000129479
Tvp23a	97.415	-2.32012	0.465323	-4.98604	6.16295e-07	1.43626e-05
Syt11	273.988	-2.32749	0.429117	-5.42391	5.83106e-08	1.82958e-06
Prrt1	27.526	-2.32877	0.601818	-3.86956	0.00010903	0.00119153
Zfp853	75.1168	-2.33382	0.669577	-3.48551	0.000491205	0.0041202
Adgra2	1054.55	-2.33552	0.50038	-4.6675	3.04893e-06	5.82264e-05
Pcolce	2379.73	-2.33727	0.466729	-5.00777	5.5063e-07	1.31052e-05
Hoxc8	60.6108	-2.3384	0.646193	-3.61874	0.000296045	0.00273896
Eln	3211.34	-2.34052	0.561553	-4.16794	3.07368e-05	0.000418796
Slc2a3	123.116	-2.34257	0.688546	-3.40219	0.000668472	0.00527403
Bcat1	191.275	-2.34757	0.473962	-4.95308	7.30477e-07	1.67366e-05
Cpeb1	63.3959	-2.35093	0.666267	-3.52851	0.000417913	0.00361884
Kcna6	79.9738	-2.35142	0.793562	-2.96311	0.00304543	0.0175264
Gm30191	37.3639	-2.35373	0.792266	-2.97088	0.00296947	0.0172325
Flnc	827.327	-2.35375	0.432371	-5.44383	5.21484e-08	1.6509e-06
Dlx3	84.3174	-2.3551	0.586039	-4.01867	5.85287e-05	0.00071256
Gm14435	25.7197	-2.36494	0.636897	-3.71323	0.000204633	0.0020116
Ramp3	68.3799	-2.36761	0.455339	-5.19967	1.99641e-07	5.34341e-06
Igsf10	1984.89	-2.36992	0.382612	-6.19406	5.86357e-10	3.07359e-08
Papss2	410.717	-2.37175	0.388565	-6.10388	1.03524e-09	5.01026e-08
Arsj	105.343	-2.38191	0.356026	-6.69025	2.22786e-11	1.61956e-09
Csdc2	282.011	-2.38235	0.467398	-5.09706	3.44972e-07	8.64387e-06
Kcnk16	134.615	-2.38293	0.535711	-4.44816	8.66094e-06	0.000145755
S100b	86.1218	-2.38401	0.704487	-3.38404	0.00071428	0.00555627
Shisa8	135.439	-2.38473	0.7173	-3.32459	0.000885478	0.0066412
Gpr173	43.5874	-2.38496	0.68164	-3.49885	0.000467268	0.00394942
B230217C12Rik	37.9019	-2.39971	0.731673	-3.27976	0.00103895	0.00752178
Aoc3	364.58	-2.40332	0.586744	-4.09604	4.20285e-05	0.00054169
Meis2	120.381	-2.40427	0.422778	-5.68684	1.29414e-08	4.88482e-07
Ttyh1	84.7967	-2.41031	0.688693	-3.49983	0.000465556	0.0039408
Baiap3	67.3821	-2.41106	0.59113	-4.07873	4.52828e-05	0.000576727
Crispld2	4143.55	-2.41343	0.419067	-5.75906	8.45861e-09	3.35778e-07
Piezo2	481.547	-2.42021	0.449262	-5.38708	7.16122e-08	2.19623e-06
Ebf1	416.681	-2.42209	0.652766	-3.71051	0.000206841	0.00202991
Esrrb	83.7003	-2.42275	0.840654	-2.88198	0.0039518	0.0214862
Zeb1	539.211	-2.42719	0.510876	-4.75102	2.02391e-06	4.1142e-05
Acta2	5454.01	-2.43218	0.713205	-3.41022	0.000649105	0.00515577
Fap	312.094	-2.43977	0.507573	-4.80674	1.53414e-06	3.22627e-05
Dnaic2	34.9044	-2.44436	0.512983	-4.765	1.88852e-06	3.87916e-05
Dchs1	534.69	-2.45282	0.563913	-4.34965	1.36356e-05	0.000211106
Ptgis	139.725	-2.4539	0.889429	-2.75896	0.00579859	0.0289963
Nmnat2	32.6929	-2.45509	0.76355	-3.21536	0.00130281	0.00902517
Kcp	326.959	-2.45579	0.493603	-4.97524	6.51669e-07	1.51438e-05
Shd	23.6285	-2.46046	0.657625	-3.74143	0.000182976	0.00183132
S1pr3	1532.58	-2.46726	0.415133	-5.9433	2.79337e-09	1.23055e-07
Prdm5	101.231	-2.46727	0.585001	-4.21755	2.46966e-05	0.000348777
Olfml2a	2593.91	-2.47175	0.366477	-6.74463	1.53417e-11	1.14835e-09
Ndnf	127.009	-2.47245	0.770884	-3.20728	0.00133994	0.00922811
Fkbp10	2151.79	-2.47797	0.394246	-6.28534	3.27147e-10	1.80033e-08
Psd2	89.5204	-2.48065	0.765897	-3.23889	0.00119997	0.00846885
Cldn15	25.399	-2.48301	0.523683	-4.74143	2.12214e-06	4.27452e-05
Enpp2	669.894	-2.48389	0.405746	-6.12177	9.25387e-10	4.55347e-08
Lum	2762.74	-2.48541	0.630484	-3.94207	8.0783e-05	0.000921566
Ptgir	86.7828	-2.48849	0.907838	-2.74111	0.00612315	0.0302307
Cdkn1c	561.552	-2.48917	0.621208	-4.00698	6.14993e-05	0.00074359
Pde3a	315.859	-2.49137	0.450453	-5.5308	3.18775e-08	1.07671e-06
Abcc9	160.194	-2.50059	0.649977	-3.8472	0.000119476	0.00129323
Loxl3	1267.83	-2.50366	0.461981	-5.4194	5.98005e-08	1.86969e-06
Krt42	280.843	-2.51307	0.417689	-6.01662	1.781e-09	8.21446e-08
Fam90a1a	188.333	-2.51729	0.742949	-3.38824	0.000703436	0.00549345
Meltf	144.345	-2.51863	0.537342	-4.68721	2.76959e-06	5.34113e-05
Dclk2	118.198	-2.53051	0.521145	-4.85567	1.19982e-06	2.60058e-05
Tulp1	41.0455	-2.53147	0.691782	-3.65935	0.00025286	0.00239763
Flvcr2	60.4354	-2.53329	0.53386	-4.74524	2.0826e-06	4.20448e-05
Zfhx4	288.204	-2.5351	0.586459	-4.32272	1.54117e-05	0.000233488
Gata2	84.6099	-2.53609	0.683326	-3.71139	0.000206122	0.00202398
Nnmt	174.288	-2.55047	0.616675	-4.13585	3.53648e-05	0.000467604
Ccdc13	19.1099	-2.55561	0.672715	-3.79895	0.000145313	0.00151354
Cnrip1	78.2207	-2.56564	0.684511	-3.74813	0.000178157	0.00179222
Cbs	275.472	-2.56941	0.544017	-4.72304	2.32348e-06	4.61171e-05
Rspo1	208.287	-2.57359	0.52336	-4.91743	8.7686e-07	1.97825e-05
Dact3	212.72	-2.57395	0.465188	-5.53313	3.14558e-08	1.06654e-06
Gm21596	75.6102	-2.57451	0.95491	-2.69607	0.00701627	0.0335888
Ntrk1	39.0141	-2.59276	0.706691	-3.66888	0.000243615	0.00232368
Pcdh10	83.6782	-2.59699	0.592606	-4.38232	1.17424e-05	0.000185998
1700003F12Rik	13.6371	-2.59927	0.803903	-3.23331	0.00122366	0.00859138
Timp1	770.054	-2.60844	0.401255	-6.50069	7.99526e-11	5.06223e-09
Pabpc4l	57.1751	-2.60955	0.721575	-3.61646	0.00029866	0.002755
Ednra	1455.37	-2.6109	0.364009	-7.17262	7.35745e-13	7.42682e-11
Thbs2	2597.77	-2.6199	0.553304	-4.735	2.19052e-06	4.38228e-05
Tenm3	704.62	-2.6256	0.434847	-6.038	1.5604e-09	7.27293e-08
P2rx3	37.1228	-2.62618	0.491112	-5.34742	8.92188e-08	2.64945e-06
Abcd2	123.441	-2.63257	0.429068	-6.13554	8.48679e-10	4.23501e-08
Gpr176	85.7209	-2.63645	0.64675	-4.07646	4.57259e-05	0.000580696
Bmpr1b	146.265	-2.63696	0.358697	-7.3515	1.95996e-13	2.15048e-11
Adam19	642.358	-2.64009	0.54282	-4.86366	1.15234e-06	2.5069e-05
Ank2	243.838	-2.6412	0.469835	-5.62154	1.89262e-08	6.90766e-07
Atp2a3	1428.96	-2.64486	0.5738	-4.60937	4.03885e-06	7.44742e-05
Prnd	38.9418	-2.64972	0.675567	-3.92222	8.77357e-05	0.000989253
Fam198b	771.521	-2.65072	0.483667	-5.48046	4.24221e-08	1.39521e-06
Lrrc15	1054.61	-2.65237	0.774035	-3.42667	0.000611022	0.00491965
Dennd2a	821.188	-2.65865	0.454596	-5.84838	4.96376e-09	2.04871e-07
Col1a1	73404.7	-2.66906	0.531264	-5.02399	5.06098e-07	1.2147e-05
Gm32742	151.555	-2.66979	0.557003	-4.79314	1.64192e-06	3.42843e-05
Mageh1	181.607	-2.67784	0.434722	-6.15989	7.27939e-10	3.69513e-08
Rcn3	2161.91	-2.67847	0.474328	-5.64688	1.63389e-08	6.05089e-07
Itih2	2033.09	-2.68065	0.705161	-3.80148	0.000143837	0.00150082
Mmp17	92.3502	-2.68366	0.6361	-4.21893	2.45465e-05	0.000347169
Scml4	740.419	-2.68544	0.38186	-7.03253	2.02817e-12	1.92622e-10
Cd300ld5	51.828	-2.68669	0.839115	-3.20181	0.00136568	0.00938706
Mcoln2	104.404	-2.69174	0.53079	-5.0712	3.95319e-07	9.76687e-06
Foxs1	193.33	-2.69544	0.508599	-5.29974	1.15966e-07	3.30409e-06
Vcan	5681.48	-2.69858	0.420619	-6.41572	1.40158e-10	8.4214e-09
Col5a3	5603.58	-2.70008	0.63817	-4.23098	2.32679e-05	0.000332547
Tbx15	655.996	-2.70029	0.583695	-4.62621	3.72418e-06	6.93963e-05
Lix1	46.6365	-2.70545	0.554103	-4.88257	1.0471e-06	2.30636e-05
Tbx1	36.5929	-2.70948	0.645674	-4.19636	2.71243e-05	0.000376987
St8sia6	317.558	-2.72914	0.507229	-5.3805	7.42809e-08	2.25459e-06
Adra1a	71.248	-2.73912	0.920988	-2.97411	0.00293841	0.0170915
Zbtb16	85.0942	-2.74176	0.794687	-3.45011	0.000560361	0.00458914
Gfra4	33.9416	-2.74728	0.802663	-3.42271	0.000620002	0.00498024
Igf2	1287.05	-2.74756	0.735155	-3.73738	0.000185945	0.00185682
Pi15	447.391	-2.77655	0.667542	-4.15937	3.19129e-05	0.000430353
Il12rb1	35.9118	-2.78219	0.612998	-4.53866	5.66133e-06	9.97082e-05
Ptn	7326.69	-2.79508	0.306243	-9.12701	7.04177e-20	2.10835e-17
Nid2	717.502	-2.79539	0.417828	-6.69029	2.2273e-11	1.61956e-09
Rtl5	206.311	-2.80161	0.589752	-4.75049	2.02927e-06	4.12034e-05
Tfpi	164.159	-2.80955	0.597212	-4.70444	2.54564e-06	4.99099e-05
Vstm4	148.324	-2.81051	0.700521	-4.01202	6.02008e-05	0.000730892
C1qtnf5	282.108	-2.81314	0.475809	-5.91233	3.37311e-09	1.44875e-07
Clip3	300.508	-2.81599	0.642778	-4.38097	1.1815e-05	0.000186349
Ptprn	150.489	-2.81944	0.714477	-3.94616	7.9415e-05	0.000910361
Lalba	76.6683	-2.82016	0.67901	-4.15333	3.27665e-05	0.000439499
Col5a2	15897.4	-2.82082	0.52285	-5.39509	6.84881e-08	2.11511e-06
Slc27a6	113.986	-2.82316	0.454388	-6.2131	5.1949e-10	2.74754e-08
Mfap4	459.513	-2.82767	0.594114	-4.75948	1.94089e-06	3.97285e-05
Armcx2	840.129	-2.83622	0.404923	-7.00434	2.48145e-12	2.25953e-10
Mmd	562.083	-2.8456	0.360764	-7.88768	3.07847e-15	4.4614e-13
Sox8	214.644	-2.84645	0.649999	-4.37916	1.19138e-05	0.000187433
Galnt15	98.5069	-2.84682	0.476454	-5.97501	2.30077e-09	1.03682e-07
Naalad2	144.776	-2.84831	0.649347	-4.38642	1.15229e-05	0.00018305
Adam23	224.364	-2.85603	0.680889	-4.19456	2.73407e-05	0.000378866
Snai1	271.238	-2.86666	0.468179	-6.12299	9.18367e-10	4.53253e-08
Mrc2	4164.38	-2.86838	0.516907	-5.54913	2.871e-08	9.90737e-07
Anks1b	55.1114	-2.86907	1.01391	-2.82972	0.00465894	0.0244504
Agap2	238.841	-2.86959	0.433296	-6.6227	3.52702e-11	2.42431e-09
Cap2	233.742	-2.87097	0.519821	-5.52299	3.33274e-08	1.12139e-06
Gcnt4	504.726	-2.87323	0.354926	-8.09531	5.71175e-16	9.60933e-14
Megf11	110.13	-2.8743	0.630096	-4.56169	5.07441e-06	9.0279e-05
Hoxc9	80.2819	-2.87506	0.545207	-5.27334	1.33963e-07	3.76226e-06
Rasgrf1	325.154	-2.88555	0.836488	-3.44959	0.000561429	0.00459363
Fscn1	1706.93	-2.88798	0.372674	-7.74935	9.23627e-15	1.24549e-12
Hoxc10	100.295	-2.90312	0.79271	-3.66227	0.000249988	0.00237677
Doc2b	218.203	-2.90764	0.423395	-6.86743	6.53704e-12	5.34615e-10
Adcy5	179.213	-2.90822	0.606816	-4.79259	1.64645e-06	3.43384e-05
Kank4	702.628	-2.91617	0.505552	-5.7683	8.00752e-09	3.18588e-07
Rarres1	120.939	-2.91735	0.509908	-5.72132	1.05697e-08	4.11264e-07
Mcam	1148.12	-2.93053	0.458951	-6.38527	1.7109e-10	1.00409e-08
Tmem204	66.3184	-2.93972	0.489806	-6.00181	1.95129e-09	8.88391e-08
Cbfa2t3	153.698	-2.94095	0.558026	-5.27027	1.36223e-07	3.80757e-06
Tmem200a	53.4772	-2.95683	0.764141	-3.86948	0.000109069	0.00119153
Klrb1a	77.9547	-2.97025	0.858794	-3.45863	0.000542927	0.0044775
Gpx3	3003.08	-2.98149	0.668433	-4.46042	8.17984e-06	0.000138274
Plvap	317.643	-2.98573	0.558856	-5.34258	9.16323e-08	2.71136e-06
Colec12	1117.47	-2.98828	0.49689	-6.01397	1.81034e-09	8.32805e-08
Col11a1	5763.28	-2.99485	0.474237	-6.3151	2.69994e-10	1.49983e-08
Plk5	28.2004	-2.99739	0.615428	-4.87042	1.11361e-06	2.43163e-05
Lat	60.5735	-3.01138	0.645297	-4.66666	3.0613e-06	5.83993e-05
Ptprd	222.512	-3.02054	0.500566	-6.03424	1.59709e-09	7.4049e-08
Gucy1a1	124.494	-3.02761	0.37991	-7.96928	1.596e-15	2.53995e-13
Jam3	173.054	-3.02847	0.589718	-5.13545	2.8147e-07	7.21651e-06
Calcrl	259.436	-3.03709	0.611428	-4.96721	6.79231e-07	1.56232e-05
Des	74.7801	-3.04613	0.613458	-4.9655	6.85248e-07	1.57411e-05
Hic1	569.534	-3.04953	0.56436	-5.40352	6.53448e-08	2.02868e-06
Ccn4	397.194	-3.07334	0.503331	-6.106	1.02159e-09	4.97147e-08
Cox4i2	198.254	-3.07487	0.586419	-5.24346	1.57591e-07	4.29605e-06
Reln	511.17	-3.08141	0.769734	-4.00321	6.24884e-05	0.000754517
Bex1	55.5366	-3.08489	1.18288	-2.60795	0.00910871	0.0412684
Map7d2	39.8073	-3.09536	0.801466	-3.86212	0.000112409	0.00122348
Il17b	335.462	-3.1017	0.783655	-3.958	7.5581e-05	0.0008787
Emilin1	1675.37	-3.12509	0.489284	-6.38707	1.69094e-10	9.95683e-09
Cacna1c	253.325	-3.14058	0.381113	-8.24054	1.71433e-16	3.15455e-14
Abca8a	276.496	-3.14087	1.23709	-2.53892	0.0111195	0.047769
Arap3	234.025	-3.15564	0.539436	-5.84989	4.91892e-09	2.03716e-07
Cygb	1156.64	-3.15784	0.490449	-6.43867	1.20523e-10	7.36694e-09
Lrrn2	332.603	-3.15857	0.519062	-6.08515	1.16383e-09	5.55648e-08
Lgals1	8193.51	-3.16486	0.429675	-7.36571	1.76211e-13	1.98265e-11
Shc4	282.189	-3.17683	0.4114	-7.722	1.14522e-14	1.52108e-12
Adamts4	973.259	-3.19179	0.466852	-6.83682	8.09692e-12	6.414e-10
Gm1673	30.5247	-3.19504	0.828454	-3.85663	0.000114959	0.0012497
Ripor3	191.947	-3.19925	0.464022	-6.89461	5.40109e-12	4.54334e-10
Fbn2	3159.83	-3.21158	0.485678	-6.61257	3.77697e-11	2.57607e-09
Zbtb46	238.558	-3.22143	0.402063	-8.01226	1.12622e-15	1.8252e-13
Dclk3	158.98	-3.22197	0.620817	-5.18989	2.10424e-07	5.5981e-06
Cacna1b	62.6681	-3.22504	0.657415	-4.90563	9.31265e-07	2.09032e-05
Gm45716	38.2729	-3.24619	0.575261	-5.64299	1.67118e-08	6.17601e-07
Mest	1110.49	-3.24687	0.429365	-7.56203	3.96818e-14	4.93647e-12
Col6a3	29889.8	-3.27052	0.484832	-6.74567	1.52318e-11	1.14498e-09
D630003M21Rik	215.901	-3.28217	0.617506	-5.3152	1.06538e-07	3.07015e-06
Srpx	908.68	-3.28994	0.636389	-5.16969	2.34477e-07	6.19919e-06
Thbs4	151.742	-3.2951	0.651173	-5.06026	4.18692e-07	1.0244e-05
Hoxc6	82.8409	-3.29582	0.506439	-6.50784	7.6239e-11	4.86196e-09
Mfap2	1135.86	-3.30202	0.594266	-5.55647	2.75279e-08	9.59133e-07
Fam131b	68.124	-3.30439	1.00085	-3.30157	0.000961449	0.00710033
Gjc1	183.246	-3.3101	0.552474	-5.99142	2.08016e-09	9.39797e-08
Gpihbp1	32.3063	-3.31046	0.73979	-4.47486	7.64598e-06	0.000129871
Nptxr	132.298	-3.31887	0.54164	-6.12744	8.93032e-10	4.4313e-08
Smarca1	116.255	-3.33102	0.479379	-6.94861	3.68898e-12	3.25829e-10
Hpca	39.2255	-3.33265	0.598306	-5.57014	2.54539e-08	8.95704e-07
Cyp3a57	410.755	-3.36638	1.05147	-3.20159	0.00136673	0.00939061
Thy1	4441.11	-3.37599	0.52724	-6.40314	1.52215e-10	9.05348e-09
Bcl6b	119.714	-3.3856	0.428544	-7.90023	2.78391e-15	4.13258e-13
Eno1b	32.2431	-3.3994	1.15494	-2.94336	0.0032467	0.0184254
Chst1	291.05	-3.42907	0.409169	-8.38058	5.26671e-17	1.08182e-14
Cped1	339.204	-3.43063	0.498118	-6.88718	5.6911e-12	4.74214e-10
Kcne4	49.7286	-3.43298	0.863793	-3.97431	7.05845e-05	0.000830143
Gria3	271.537	-3.4341	0.656389	-5.23181	1.67863e-07	4.55499e-06
Slc6a15	96.1659	-3.43736	0.835225	-4.11549	3.86354e-05	0.000504914
Gm11627	25.2626	-3.44431	0.632209	-5.44805	5.09243e-08	1.62091e-06
Wnt2	41.4358	-3.5225	1.10452	-3.18918	0.00142679	0.0096796
Hoxd8	27.7763	-3.53168	0.878819	-4.01866	5.85296e-05	0.00071256
Rbp7	130.065	-3.5606	0.429063	-8.29854	1.05395e-16	2.0237e-14
Zfp57	82.274	-3.56662	0.754953	-4.7243	2.30906e-06	4.58825e-05
Bche	76.5403	-3.5729	0.471493	-7.57785	3.51336e-14	4.43311e-12
Adamts12	1317.96	-3.57329	0.536223	-6.66382	2.66799e-11	1.9081e-09
Amn	266.792	-3.58531	0.453326	-7.90888	2.59707e-15	3.88791e-13
Synpr	89.6896	-3.60278	0.893013	-4.03441	5.4739e-05	0.000675727
Pnmal2	82.7876	-3.61317	0.564967	-6.39536	1.60165e-10	9.49433e-09
Podnl1	115.608	-3.63378	0.658714	-5.51647	3.45868e-08	1.16142e-06
Spry4	693.855	-3.65451	0.404618	-9.032	1.68561e-19	4.7264e-17
Nr2f1	150.492	-3.65516	0.477788	-7.65017	2.00711e-14	2.60703e-12
Rpl39l	141.536	-3.6567	0.610161	-5.99301	2.0599e-09	9.35427e-08
Unc5c	238.148	-3.67703	0.748067	-4.91538	8.86122e-07	1.99406e-05
Mmp16	221.46	-3.68275	0.4171	-8.8294	1.05238e-18	2.69425e-16
Nxph3	149.805	-3.73289	0.383334	-9.73797	2.07652e-22	8.53063e-20
Adamts18	236.49	-3.74932	0.705286	-5.31602	1.0606e-07	3.06135e-06
Prkg2	410.699	-3.7521	0.707625	-5.30238	1.14301e-07	3.26719e-06
Grem2	114.335	-3.75361	0.805523	-4.65984	3.16448e-06	6.01729e-05
Itga1	705.797	-3.80003	0.527959	-7.19759	6.12883e-13	6.25814e-11
Add2	110.406	-3.80528	0.6407	-5.93926	2.8631e-09	1.255e-07
Col4a2	18818.4	-3.81943	0.402693	-9.48473	2.43011e-21	9.13361e-19
Chn1	287.602	-3.82547	0.509502	-7.50825	5.99245e-14	7.20114e-12
Ngfr	430.121	-3.83291	0.510684	-7.50545	6.12177e-14	7.30683e-12
Hapln1	94.8105	-3.8357	0.746612	-5.13747	2.78455e-07	7.15997e-06
Hc	286.194	-3.84321	0.468852	-8.19707	2.4631e-16	4.35107e-14
Morc1	65.5299	-3.85875	0.525646	-7.34097	2.12052e-13	2.31228e-11
Crlf1	100.932	-3.88762	0.680363	-5.71403	1.1033e-08	4.26472e-07
Ism2	28.5559	-3.90251	0.831031	-4.69598	2.65326e-06	5.16187e-05
Crabp1	1483.03	-3.90296	0.375631	-10.3904	2.74148e-25	1.5622e-22
Gm10197	8.38358	-3.90981	1.23267	-3.17181	0.00151491	0.0101328
Twist2	124.127	-3.92618	0.634165	-6.19109	5.97478e-10	3.12262e-08
Daam2	443.31	-3.92742	0.357351	-10.9904	4.25233e-28	3.57702e-25
Astn2	305.835	-3.93341	0.331646	-11.8603	1.90376e-32	2.58691e-29
Zfp618	296.701	-3.93353	0.665504	-5.91061	3.40839e-09	1.45785e-07
Cacng7	41.3817	-3.94204	0.84095	-4.68761	2.76419e-06	5.33694e-05
Hbb-bs	13.903	-3.95825	0.826319	-4.79022	1.66596e-06	3.47043e-05
Gucy1b1	171.385	-3.96443	0.544525	-7.28052	3.32544e-13	3.49666e-11
6330403K07Rik	43.7781	-3.96484	0.9317	-4.25549	2.08589e-05	0.000302275
Cabp1	38.4341	-3.97164	0.925623	-4.29078	1.7805e-05	0.000263856
Asphd2	97.4858	-3.97227	0.725709	-5.47364	4.40879e-08	1.43958e-06
Gm13193	4.30447	-3.98605	1.29246	-3.08408	0.00204182	0.0129372
1500009L16Rik	50.4685	-3.98926	0.723448	-5.51423	3.50307e-08	1.16979e-06
Col4a1	28897.2	-4.00803	0.444134	-9.02438	1.80715e-19	4.98801e-17
Kcnab1	52.7398	-4.03679	0.967379	-4.17291	3.00729e-05	0.000411812
Tac1	41.2351	-4.12981	1.12438	-3.67298	0.000239741	0.00229168
Itm2a	879.559	-4.13533	0.549122	-7.53081	5.04273e-14	6.10135e-12
Cd79b	160.409	-4.13617	0.759312	-5.44726	5.11525e-08	1.6252e-06
Sema3a	103.489	-4.14332	0.705196	-5.87541	4.21805e-09	1.76568e-07
Prrx2	583.363	-4.15345	0.528025	-7.86602	3.66115e-15	5.21566e-13
Pdgfrb	4954.22	-4.17566	0.455757	-9.16203	5.09297e-20	1.57837e-17
Actg2	556.217	-4.189	1.04441	-4.01089	6.04915e-05	0.000733412
2024-09-04	144.591	-4.23307	0.673976	-6.28074	3.36958e-10	1.84856e-08
Filip1	152.533	-4.2366	0.537124	-7.88757	3.08118e-15	4.4614e-13
Shc3	25.9999	-4.25251	0.681298	-6.24177	4.32639e-10	2.33005e-08
Shox2	342.391	-4.29642	0.588398	-7.30189	2.83744e-13	3.01948e-11
Rem1	135.357	-4.31349	0.978003	-4.41051	1.03127e-05	0.000168213
Lama2	3129.76	-4.33776	0.617776	-7.02157	2.19392e-12	2.05056e-10
Mdk	795.855	-4.37434	0.497787	-8.78757	1.52824e-18	3.80172e-16
Angpt2	191.576	-4.38382	0.446558	-9.8169	9.52249e-23	4.20537e-20
Snap25	221.704	-4.41444	1.16686	-3.78317	0.000154843	0.00159301
Tub	63.5986	-4.42072	0.749343	-5.89946	3.64693e-09	1.54122e-07
Crispld1	759.992	-4.42412	0.501599	-8.82004	1.1442e-18	2.88748e-16
Msx1	1122.02	-4.44642	0.550627	-8.07519	6.73707e-16	1.12274e-13
Enpp6	62.4318	-4.4558	1.0772	-4.13648	3.52671e-05	0.000466662
Gm32102	3.58826	-4.47518	1.75196	-2.55438	0.0106377	0.0462488
Peg10	391.027	-4.47574	0.544455	-8.22058	2.02526e-16	3.65064e-14
a	39.411	-4.49455	0.98184	-4.57768	4.70168e-06	8.46637e-05
Lrch2	55.993	-4.49776	0.758073	-5.93315	2.97174e-09	1.2994e-07
Unc5a	190.234	-4.49887	0.493213	-9.12156	7.40522e-20	2.18022e-17
Pear1	696.247	-4.51172	0.452998	-9.95969	2.28785e-23	1.15471e-20
Dcpp3	744.893	-4.52581	1.21319	-3.7305	0.000191104	0.00189735
6030408B16Rik	77.0513	-4.56236	0.554026	-8.23492	1.79679e-16	3.2722e-14
Sema7a	1475.74	-4.56327	0.435629	-10.4751	1.12408e-25	7.09175e-23
Col28a1	114.143	-4.60609	0.73495	-6.26722	3.67542e-10	1.99773e-08
Uchl1	42.821	-4.67073	0.724291	-6.4487	1.12814e-10	6.92033e-09
Heyl	487.526	-4.85412	0.659101	-7.36476	1.77465e-13	1.98413e-11
Tmem59l	36.5683	-4.90598	1.41508	-3.46692	0.000526449	0.0043538
Col15a1	9497.38	-4.94263	0.410878	-12.0294	2.48885e-33	3.99687e-30
Slc38a4	92.3627	-4.99522	0.731971	-6.82434	8.83316e-12	6.90432e-10
Kera	589.525	-5.054	0.778173	-6.4947	8.32008e-11	5.24908e-09
Nptx2	280.932	-5.05453	0.523793	-9.64987	4.92173e-22	1.97596e-19
Gng8	28.4825	-5.07189	1.21037	-4.19036	2.78514e-05	0.000385274
Capn6	1328	-5.09211	0.596744	-8.53315	1.42421e-17	3.06812e-15
Wdr86	162.4	-5.12166	0.746967	-6.85661	7.0514e-12	5.63634e-10
Nes	1541.9	-5.24983	0.419084	-12.5269	5.31896e-36	1.34228e-32
Col26a1	898.179	-5.25191	0.572476	-9.17403	4.55643e-20	1.43731e-17
Egflam	1085.63	-5.29348	0.566179	-9.34947	8.80863e-21	3.11209e-18
Pcdh12	216.07	-5.30423	0.452762	-11.7153	1.06438e-31	1.25348e-28
Gm2436	10.8613	-5.33092	1.99199	-2.67619	0.00744653	0.0350968
Npw	10.7695	-5.43121	1.62199	-3.34848	0.000812559	0.00617902
Frzb	54.6762	-5.46332	0.95995	-5.69125	1.26109e-08	4.78052e-07
Dcpp1	115.232	-5.53345	1.00921	-5.48296	4.18271e-08	1.3785e-06
Tro	200.111	-5.56095	0.656622	-8.46903	2.47435e-17	5.14228e-15
Scube1	587.097	-5.58674	0.537256	-10.3987	2.51447e-25	1.4806e-22
Meox1	571.344	-5.60492	0.624762	-8.97129	2.93072e-19	7.96479e-17
Jsrp1	25.563	-5.6172	0.886907	-6.33347	2.39706e-10	1.34854e-08
Atp1a2	685.034	-5.65169	0.474885	-11.9012	1.16695e-32	1.71784e-29
Pde11a	267.187	-5.78599	0.480231	-12.0483	1.97876e-33	3.49547e-30
Kcnd3	88.4877	-5.80785	0.761719	-7.62467	2.44666e-14	3.13191e-12
Agtr2	101.945	-5.81726	1.08032	-5.38478	7.25341e-08	2.21681e-06
Efcab6	57.5611	-5.99221	0.851775	-7.03497	1.99309e-12	1.90313e-10
Tnmd	593.452	-6.01066	0.742443	-8.09578	5.68987e-16	9.60933e-14
Sh3gl3	37.4646	-6.0596	1.09143	-5.55196	2.82487e-08	9.8038e-07
Apela	17.2432	-6.06753	1.17632	-5.15805	2.4953e-07	6.52015e-06
Crym	334.291	-6.13059	0.876758	-6.99235	2.70326e-12	2.43638e-10
Alx4	1291.09	-6.25467	0.602298	-10.3847	2.91145e-25	1.60721e-22
Dlx1	173.701	-6.26763	0.772661	-8.11175	4.98962e-16	8.64133e-14
Tpsb2	74.1201	-6.28893	1.0168	-6.18502	6.20965e-10	3.20741e-08
Dlx2	228.091	-6.36757	1.2385	-5.14137	2.72738e-07	7.03345e-06
Lbhd2	157.593	-6.47376	1.52989	-4.23151	2.32131e-05	0.000332301
Kcng1	160.372	-6.60936	0.756905	-8.73209	2.50016e-18	6.05004e-16
Frem1	1590.19	-6.66971	0.539765	-12.3567	4.48298e-35	9.89897e-32
Lamp5	15.461	-6.72798	1.50093	-4.48254	7.37581e-06	0.000126254
Mcpt4	87.7005	-6.80532	0.982164	-6.9289	4.24123e-12	3.66774e-10
Wdr63	49.0936	-6.81799	1.07498	-6.34245	2.26142e-10	1.28039e-08
Lamc3	1744.17	-6.85032	0.52768	-12.9819	1.54892e-38	5.47234e-35
Meox2	151.97	-6.88029	0.701575	-9.80693	1.05122e-22	4.5292e-20
Col13a1	606.927	-7.22297	0.697704	-10.3525	4.07743e-25	2.18266e-22
St6galnac3	79.2338	-7.23127	0.994361	-7.27228	3.53481e-13	3.69482e-11
Cma1	79.9441	-7.31597	1.09946	-6.65418	2.84879e-11	2.01296e-09
Nrgn	120.055	-7.4041	0.940544	-7.87214	3.48615e-15	5.00674e-13
Emilin3	563.553	-7.41792	0.70886	-10.4646	1.25639e-25	7.65314e-23
Cpa3	69.7433	-7.54424	1.28082	-5.89018	3.8577e-09	1.6264e-07
Chrm2	169.028	-7.7626	0.892748	-8.69518	3.46293e-18	8.04902e-16
Fgf3	35.1809	-8.55407	1.55228	-5.51066	3.57485e-08	1.1915e-06
Gm45315	184.483	-8.88086	3.33073	-2.66634	0.00766825	0.0359978
Tpsab1	49.0388	-9.03143	2.38723	-3.78323	0.000154806	0.00159301
Epyc	513.59	-9.63086	0.824719	-11.6778	1.65614e-31	1.72092e-28
Pdyn	99.2316	-10.048	1.2905	-7.78617	6.90689e-15	9.53204e-13

## Sheet: DEGs (dgPlgrkt vs dgSHL)
gene	baseMean	log2FoldChange	lfcSE	stat	pvalue	padj
Necab1	823.432	8.61025	0.50443	17.0693	2.51302e-65	4.27364e-61
Lalba	648.114	8.60508	0.811548	10.6033	2.87665e-26	3.7631e-23
Gm2614	32.0535	8.54662	1.1014	7.75979	8.50724e-15	3.21498e-12
Slc39a5	86.224	8.52017	1.29345	6.58715	4.48339e-11	9.29811e-09
H60b	147.949	8.3063	0.826822	10.0461	9.56142e-24	9.59578e-21
Fgf4	301.485	8.24233	1.4854	5.54888	2.87498e-08	3.51741e-06
2310057J18Rik	3629.15	7.73516	1.50005	5.15662	2.51453e-07	2.2272e-05
Gm15899	17.1234	7.64093	1.64044	4.65786	3.19517e-06	0.000203509
Tm6sf2	129.84	7.10388	0.732931	9.69243	3.247e-22	2.4008e-19
Ntn5	194.006	6.87527	1.89154	3.63474	0.000278263	0.00772364
Sec1	185.499	6.73265	1.26114	5.33853	9.37021e-08	9.48511e-06
Hck	1756.99	6.45605	0.535012	12.0671	1.57549e-33	5.35857e-30
Wfdc1	146.285	6.2185	0.695699	8.93849	3.94524e-19	2.68371e-16
Ddx4	48.9101	5.53466	1.2277	4.50817	6.53889e-06	0.000368318
Gm11545	10.819	5.48669	1.29289	4.24376	2.19809e-05	0.000939216
Csn3	64063.2	5.41095	0.653366	8.28166	1.21472e-16	5.90217e-14
Acss1	3685.04	5.3595	0.485028	11.0499	2.19491e-28	4.1474e-25
Dkkl1	3793.04	5.3353	0.36771	14.5096	1.05396e-47	5.97455e-44
Pla2g2e	68.6762	5.33354	0.683579	7.80238	6.07528e-15	2.4027e-12
Scgb2b27	20.7799	5.23162	1.07694	4.85788	1.18649e-06	8.77283e-05
Rspo1	1782.97	4.97619	0.499898	9.9544	2.4128e-23	2.27956e-20
Klk6	1336.96	4.8734	1.16674	4.17694	2.95459e-05	0.00120493
Dmrta1	94.7464	4.80592	0.704688	6.81992	9.109e-12	2.1515e-09
Car6	77.2084	4.78065	0.723755	6.60534	3.96612e-11	8.4455e-09
1810065E05Rik	15.8154	4.7086	1.09584	4.29677	1.73301e-05	0.000783819
Kcnh3	325.552	4.61719	0.385155	11.9879	4.11344e-33	1.16589e-29
F5	802.133	4.57215	0.416319	10.9823	4.64912e-28	7.90629e-25
Lzts1	1864	4.56839	0.468628	9.74845	1.87313e-22	1.51688e-19
Plcd4	156.813	4.56661	0.434324	10.5143	7.42442e-26	8.41732e-23
Adora1	174.115	4.54996	0.630572	7.21562	5.36905e-13	1.57424e-10
Tnni1	500.462	4.5008	0.505863	8.89728	5.72305e-19	3.74331e-16
Klk10	6548.71	4.47328	0.755079	5.92425	3.13718e-09	4.89458e-07
Prrt1	100.082	4.39024	0.571449	7.68264	1.55843e-14	5.1966e-12
Syt3	547.017	4.2786	0.562624	7.60472	2.8553e-14	9.33793e-12
Pcp4l1	1023.08	4.18546	0.540682	7.74107	9.85819e-15	3.45963e-12
Ceacam10	49.7444	4.17631	0.603699	6.91787	4.585e-12	1.1814e-09
Rbfox3	76.5044	4.1017	0.816597	5.02292	5.0893e-07	4.12136e-05
Bpifb5	43.9069	4.02633	1.03341	3.89615	9.77342e-05	0.00320244
Trim46	939.802	4.01631	0.350217	11.4681	1.90855e-30	4.63669e-27
Brinp1	527.959	3.89063	0.729073	5.3364	9.48083e-08	9.5403e-06
Gng13	37.8713	3.8704	0.85319	4.53639	5.72261e-06	0.000332146
Timd2	51.5071	3.8598	1.06208	3.63418	0.000278861	0.00772364
Hpse2	154.199	3.85305	0.560825	6.87034	6.40508e-12	1.55607e-09
Pm20d1	830.953	3.8229	0.67941	5.62679	1.83592e-08	2.40167e-06
Epha5	119.086	3.80459	0.485858	7.83066	4.8531e-15	1.96504e-12
Prl2c2	156.85	3.7981	0.868546	4.37294	1.22585e-05	0.000593924
Bglap3	1304.32	3.79072	0.65271	5.80766	6.3351e-09	8.9779e-07
Tead2	2449.9	3.78341	0.312999	12.0876	1.2279e-33	5.22044e-30
Plgrkt	6885.53	3.61985	0.227524	15.9097	5.42333e-57	4.61146e-53
Gm49594	33.5806	3.597	0.765144	4.70108	2.58794e-06	0.000168623
Prl2c3	445.833	3.5641	0.778635	4.57737	4.70865e-06	0.000281955
Cel	136.498	3.53811	0.756466	4.67715	2.9089e-06	0.000187382
Wap	25.3701	3.5034	0.786546	4.45416	8.42238e-06	0.000446203
Pfkfb4	675.38	3.47769	0.327048	10.6336	2.08011e-26	2.94786e-23
Ogfrl1	2894.69	3.46261	0.417146	8.30071	1.03492e-16	5.33331e-14
Acox2	624.918	3.45208	0.352741	9.78644	1.2875e-22	1.09476e-19
Reg3b	136.325	3.45122	0.922304	3.74196	0.000182594	0.0054477
Limch1	470.772	3.44699	0.444702	7.75125	9.09927e-15	3.29239e-12
Phactr1	1270.78	3.41031	0.548722	6.215	5.13237e-10	8.99806e-08
Kcnq4	69.2529	3.39329	0.432867	7.83912	4.53723e-15	1.88195e-12
Lbhd2	478.753	3.38097	0.634759	5.32639	1.00184e-07	9.96335e-06
Soga3	52.0853	3.32834	0.815317	4.08226	4.45993e-05	0.00167061
Nnat	42.911	3.30873	0.908808	3.64073	0.000271864	0.00760415
Mybpc2	129.737	3.30827	0.329321	10.0457	9.59239e-24	9.59578e-21
Slc27a6	170.314	3.23296	0.793722	4.07316	4.63794e-05	0.00172946
Grrp1	294.15	3.20668	0.570472	5.6211	1.89747e-08	2.44457e-06
Chil1	40823	3.19601	0.71906	4.4447	8.80137e-06	0.000463394
Cnn1	4566.76	3.18633	0.767101	4.15374	3.2709e-05	0.00131813
1700008O03Rik	58.7155	3.14569	0.679222	4.63132	3.63343e-06	0.000226337
Saa2	471.309	3.13237	0.679923	4.60696	4.08608e-06	0.000250859
Gpd1	300.097	3.12854	0.288593	10.8407	2.20849e-27	3.41432e-24
Alpl	1546.45	3.10594	0.293317	10.589	3.35042e-26	4.06981e-23
Pmp22	3858.67	3.07795	0.556086	5.53503	3.11176e-08	3.77382e-06
Ulk4	183.493	3.04525	0.884646	3.44234	0.000576712	0.0137554
Foxi1	513.999	3.03772	0.733517	4.14131	3.45332e-05	0.00137213
Cdsn	62.5691	3.01021	0.478519	6.29068	3.1608e-10	5.77984e-08
Dbndd1	52.6518	2.98604	0.560155	5.33074	9.78135e-08	9.7848e-06
Rbp7	689.953	2.97337	0.470536	6.31912	2.63058e-10	4.91601e-08
Alkal2	68.5286	2.97111	0.833062	3.5665	0.000361787	0.00950935
Faim2	109.299	2.96906	0.455204	6.52248	6.91561e-11	1.38361e-08
S100b	363.692	2.96202	0.380421	7.78617	6.90686e-15	2.6695e-12
Tc2n	158.023	2.95497	0.690352	4.28038	1.86578e-05	0.000829291
Lrg1	4835.11	2.93965	0.580893	5.06057	4.17996e-07	3.53654e-05
Klk14	28.414	2.93226	0.950518	3.08491	0.00203612	0.0354414
Fam171a2	87.9392	2.92939	0.554407	5.28382	1.26519e-07	1.21559e-05
Ccl20	104.721	2.92614	0.697039	4.19796	2.6933e-05	0.00112536
Folr1	423.714	2.8928	0.541785	5.33939	9.32597e-08	9.48511e-06
Pstpip1	498.563	2.89164	0.4809	6.01298	1.82145e-09	2.92223e-07
Cpm	1350.86	2.87295	0.7179	4.00188	6.28413e-05	0.00220801
Paqr8	221.631	2.8541	0.418922	6.81296	9.56074e-12	2.22726e-09
Plekho1	248.873	2.83099	0.490624	5.77018	7.9185e-09	1.09481e-06
Ltc4s	65.2221	2.79181	0.527492	5.29262	1.20575e-07	1.17171e-05
Lyg1	8.68074	2.78466	0.909879	3.06047	0.00220989	0.0373944
Nexn	327.762	2.78163	0.552653	5.03324	4.82251e-07	3.99617e-05
Pde10a	82.119	2.76668	0.887086	3.11884	0.00181565	0.032813
Pip5kl1	22.5709	2.7572	0.884609	3.11686	0.00182791	0.0329994
Spaar	67.7687	2.75432	0.527224	5.22419	1.74921e-07	1.64349e-05
Clca3a2	7474.88	2.75122	0.545271	5.04561	4.5208e-07	3.76867e-05
Tnfsf12	181.161	2.74552	0.678178	4.04838	5.15737e-05	0.00187808
Kcnn4	2593.96	2.69914	0.564128	4.78463	1.71302e-06	0.000118421
Aqp5	2278.15	2.69119	0.459301	5.85932	4.64769e-09	6.75544e-07
Shisa8	388.656	2.64944	0.639495	4.14301	3.4277e-05	0.00136894
Col9a1	981.356	2.6335	0.794467	3.3148	0.000917099	0.0195196
Arl4d	278.687	2.62288	0.63723	4.11606	3.85407e-05	0.00149299
Kalrn	636.395	2.62051	0.306994	8.53601	1.38932e-17	8.14717e-15
Speer6-ps1	43.3795	2.61556	0.586905	4.45653	8.32983e-06	0.000442678
Gm7897	28.6136	2.61054	0.830902	3.14181	0.00167906	0.0310303
Clca3a1	268.166	2.60792	0.402779	6.47482	9.4928e-11	1.85557e-08
Axin2	97.0496	2.6024	0.385525	6.75028	1.47557e-11	3.34581e-09
Ushbp1	54.4211	2.60148	0.591984	4.39451	1.11023e-05	0.000557814
Gm30191	211.629	2.58046	0.877147	2.94188	0.00326229	0.0495999
Ceacam20	62.0389	2.57112	0.542531	4.73912	2.14649e-06	0.000145431
Rps6kl1	101.114	2.56816	0.642183	3.99912	6.35794e-05	0.00222476
Tifa	591.853	2.566	0.333707	7.68938	1.47844e-14	5.02847e-12
Muc20	722.757	2.56168	0.667952	3.83513	0.000125496	0.00394488
Tagln	4729.85	2.54336	0.726414	3.50126	0.000463072	0.0114357
Shank1	320.206	2.54269	0.55339	4.59475	4.33273e-06	0.000263198
Hba-a1	195.207	2.52764	0.752671	3.35822	0.000784448	0.01753
Acta2	24900.3	2.5026	0.76116	3.28788	0.00100945	0.0210892
Egfl8	27.0135	2.50244	0.576666	4.33949	1.42811e-05	0.000676502
Muc15	1458.6	2.49157	0.748148	3.33032	0.000867462	0.0188164
Selp	67.9061	2.48582	0.608583	4.0846	4.41533e-05	0.00166122
Hrct1	254.55	2.48367	0.362232	6.85655	7.05414e-12	1.68961e-09
Myo7a	229.581	2.47957	0.534577	4.63838	3.51149e-06	0.000220356
Cst6	1305.99	2.46427	0.751675	3.27837	0.00104407	0.0214222
Fam89a	378.311	2.45836	0.423468	5.80531	6.4248e-09	9.02977e-07
Dapk2	1218.95	2.45218	0.517659	4.73706	2.16837e-06	0.00014633
A630023A22Rik	74.0522	2.44045	0.413724	5.89873	3.66304e-09	5.56194e-07
Drd4	90.8295	2.39747	0.618663	3.87525	0.000106514	0.00343715
Slc30a2	116.325	2.39533	0.468083	5.11731	3.09922e-07	2.70284e-05
Entpd1	426.178	2.39266	0.500774	4.77793	1.77107e-06	0.000120959
Ugt8a	82.322	2.38023	0.72979	3.26153	0.00110814	0.0224613
Aifm3	52.9229	2.37322	0.724307	3.27654	0.00105088	0.0215058
Gpsm3	327.414	2.37191	0.521294	4.55004	5.36362e-06	0.000315618
Slco1a5	259.751	2.3692	0.7635	3.10307	0.00191524	0.0339277
Lcn2	24379.6	2.36876	0.522568	4.53292	5.8175e-06	0.000336505
Ppfia4	38.0649	2.36659	0.791028	2.9918	0.0027734	0.0439148
Psors1c2	28.9689	2.36501	0.528042	4.47883	7.5054e-06	0.000409415
Tmc5	60.8821	2.36333	0.620427	3.80919	0.000139422	0.00432667
Hepacam2	91.9123	2.3624	0.716795	3.29578	0.000981494	0.020632
Map3k4	1346.37	2.35813	0.285407	8.26236	1.4282e-16	6.74665e-14
Cacng4	56.0916	2.35427	0.537725	4.37821	1.1966e-05	0.000588134
Eya1	50.5309	2.34597	0.78959	2.97113	0.00296707	0.0459963
Saa1	1100.38	2.329	0.697298	3.34003	0.000837692	0.0183817
Chrm1	100.438	2.32397	0.591475	3.92912	8.5259e-05	0.00286545
Reg3g	254.958	2.31894	0.68408	3.38987	0.000699265	0.0160935
Elf5	385.875	2.31091	0.694726	3.32636	0.00087987	0.0189887
Pmm1	2122.74	2.29809	0.248115	9.26222	2.00233e-20	1.41882e-17
Ppt2	825.735	2.28417	0.280092	8.15507	3.48983e-16	1.604e-13
Ctsw	22.1141	2.27685	0.710373	3.20515	0.00134991	0.0261763
Gpr137c	173.212	2.27577	0.26458	8.60143	7.87312e-18	4.78179e-15
Josd2	3129.56	2.25003	0.326519	6.89095	5.54213e-12	1.38602e-09
Ascl2	42.5168	2.23702	0.559128	4.0009	6.31016e-05	0.00221259
Bst1	1449.01	2.23429	0.674193	3.31401	0.000919669	0.0195499
Lipa	1623.87	2.22831	0.499469	4.46135	8.14462e-06	0.000434192
Ttpa	204.906	2.21436	0.600788	3.68576	0.000228022	0.0065392
Clic6	438.907	2.21124	0.62222	3.55378	0.000379731	0.00975485
Oxtr	439.369	2.20748	0.74953	2.94515	0.00322801	0.0491896
Papln	398.338	2.20317	0.422846	5.21034	1.88496e-07	1.7613e-05
Myl9	8630.45	2.1987	0.679839	3.23415	0.00122005	0.0242386
Gm16166	16.1328	2.19232	0.703603	3.11585	0.00183418	0.0330775
Slc15a2	810.886	2.18525	0.536898	4.07014	4.69849e-05	0.00174202
Slitrk6	192.355	2.17269	0.555854	3.90874	9.27776e-05	0.0030696
Pde4a	487.481	2.13582	0.343813	6.21216	5.22609e-10	9.06886e-08
Csdc2	726.494	2.13502	0.574665	3.71525	0.000203003	0.00595219
Piezo1	521.466	2.11842	0.346783	6.10877	1.00401e-09	1.65769e-07
Tnfsfm13	245.987	2.11782	0.391498	5.40952	6.31927e-08	6.7166e-06
Pgf	4106.16	2.11056	0.452982	4.65925	3.17365e-06	0.000202899
Kmt2b	420.948	2.10147	0.488269	4.30393	1.67796e-05	0.00076708
Hlf	118.925	2.10116	0.658121	3.19267	0.00140965	0.0270265
Ntn1	297.526	2.10035	0.608784	3.45007	0.000560434	0.0134425
Trabd2b	377.915	2.0918	0.681266	3.07046	0.00213728	0.0366397
Krt18	139200	2.06293	0.403972	5.10663	3.27954e-07	2.83106e-05
St3gal5	330.162	2.04677	0.454461	4.50372	6.67739e-06	0.000374771
Cited4	1033.16	2.04504	0.496188	4.1215	3.76407e-05	0.00146816
Adamts15	152.926	2.04138	0.404558	5.04597	4.51234e-07	3.76867e-05
Wfdc18	298476	2.03749	0.663963	3.06868	0.00215005	0.0367105
Adgrb1	57.3187	2.03483	0.691793	2.94138	0.00326748	0.0495999
Gm7694	73.4037	2.02706	0.363256	5.58024	2.40186e-08	3.02563e-06
Mfsd4a	328.419	2.01949	0.351763	5.74104	9.40977e-09	1.28018e-06
Prtn3	600.004	2.01895	0.597644	3.37818	0.00072968	0.0166117
Ephb3	492.839	2.01119	0.354094	5.6798	1.34849e-08	1.7916e-06
Cyp4v3	281.852	2.01081	0.484198	4.15287	3.28331e-05	0.00132
Clu	15751.2	2.00388	0.519132	3.86007	0.000113355	0.00360321
Fkbpl	349.788	1.99853	0.293891	6.80026	1.04431e-11	2.39993e-09
Caskin2	244.619	1.97858	0.31614	6.25857	3.88526e-10	6.94596e-08
Stard8	88.5196	1.97331	0.435961	4.52634	6.0014e-06	0.000345965
Tmem37	278.917	1.9695	0.447747	4.39868	1.08913e-05	0.000551243
Tspan15	592.566	1.96596	0.381229	5.1569	2.51067e-07	2.2272e-05
Tmem229b	261.794	1.96553	0.443904	4.42783	9.51855e-06	0.000495023
Gm48670	18.6589	1.96178	0.659196	2.97602	0.00292014	0.0456014
Sfrp2	1964.76	1.96002	0.571556	3.42927	0.000605199	0.0142725
Slc2a4	355.884	1.95942	0.562784	3.48166	0.000498313	0.0121409
Cngb1	54.9786	1.95143	0.463433	4.21081	2.54457e-05	0.00106584
Apln	165.411	1.92889	0.460109	4.19224	2.76211e-05	0.00114847
Fah	1886.24	1.92189	0.445958	4.30959	1.63557e-05	0.000751746
Syne4	549.039	1.91804	0.623124	3.07811	0.00208317	0.035935
Sltm	3553.2	1.89656	0.195439	9.70407	2.89708e-22	2.23944e-19
Zfp580	156.366	1.88399	0.601841	3.13039	0.00174577	0.031992
Pde9a	524.347	1.85096	0.444062	4.16826	3.0694e-05	0.00124876
Irf5	782.573	1.84901	0.421378	4.38802	1.14389e-05	0.000568801
Syngr1	154.426	1.84302	0.360542	5.1118	3.191e-07	2.76868e-05
Ripor2	216.373	1.84167	0.463373	3.9745	7.05281e-05	0.00245276
Cyp2d22	382.806	1.83794	0.469517	3.91452	9.0583e-05	0.0030087
Ccdc162	163.761	1.82487	0.531288	3.43481	0.000592973	0.0140839
Cotl1	3514.48	1.81896	0.57848	3.14438	0.00166437	0.0308662
Chst11	207.324	1.79762	0.521331	3.44814	0.000564452	0.0135019
Wfdc17	345.701	1.78973	0.547865	3.26673	0.00108798	0.0221053
Cldn7	8054.95	1.78807	0.368385	4.85381	1.21111e-06	8.90361e-05
Plppr3	1221.58	1.78505	0.409424	4.3599	1.3012e-05	0.00062509
Tcn2	4960.69	1.76701	0.304236	5.80802	6.32158e-09	8.9779e-07
Ncam1	631.371	1.76285	0.495332	3.55893	0.000372371	0.00966588
Plekhb1	4127.61	1.76266	0.572359	3.07963	0.00207255	0.0358762
Rbpms	2077.99	1.74414	0.403383	4.32378	1.53375e-05	0.000714603
Lbp	630.487	1.74365	0.389519	4.47643	7.59025e-06	0.000411082
Ppm1h	380.96	1.74076	0.362957	4.79606	1.6182e-06	0.000113617
Fam20a	1325.59	1.73167	0.55364	3.12778	0.00176129	0.032138
Mgll	370.987	1.7262	0.440958	3.91467	9.05285e-05	0.0030087
Fbxw4	211.742	1.72064	0.427579	4.02415	5.71814e-05	0.00203437
St6gal1	303.513	1.71268	0.548779	3.12089	0.00180304	0.0326545
Chrdl2	65.2537	1.71097	0.514885	3.32301	0.000890517	0.0191214
Fyb2	100.532	1.70723	0.579596	2.94555	0.00322382	0.0491896
Slc5a8	989.025	1.6904	0.490711	3.4448	0.000571487	0.0136499
Prr5	280.231	1.68582	0.435695	3.86927	0.00010916	0.00349601
Igsf5	238.326	1.6855	0.539923	3.12174	0.00179786	0.0325953
Prelid3a	24.7529	1.67961	0.523019	3.21137	0.00132102	0.0257041
Plekhs1	1311.19	1.67675	0.533412	3.14344	0.00166975	0.0309236
Cadm1	6631.87	1.66821	0.248836	6.70406	2.0271e-11	4.53591e-09
Slc1a1	318.08	1.65853	0.518932	3.19606	0.0013932	0.0268152
Il23a	331.596	1.64875	0.422981	3.89793	9.70201e-05	0.00318518
Akt3	102.941	1.64654	0.296191	5.55905	2.71243e-08	3.36697e-06
C4b	327.709	1.64074	0.443769	3.69728	0.000217926	0.00630497
Cldn23	449.78	1.63985	0.382328	4.28912	1.79382e-05	0.000804898
Ogfod2	1054.72	1.63762	0.229547	7.13412	9.74074e-13	2.76085e-10
Sectm1a	57.2304	1.63256	0.445345	3.66583	0.000246534	0.00697596
Btn1a1	102.893	1.6308	0.516011	3.1604	0.00157552	0.0294756
Fads2	1542.05	1.62856	0.306252	5.3177	1.0509e-07	1.03905e-05
Slc7a2	331.714	1.62639	0.406286	4.00308	6.25242e-05	0.00220142
Ddhd2	503.751	1.61147	0.266386	6.04939	1.45397e-09	2.37752e-07
4931406C07Rik	339.12	1.60984	0.33457	4.81168	1.4967e-06	0.000106945
Fads1	1348.78	1.60786	0.415526	3.86946	0.000109078	0.00349601
Aplp1	836.64	1.59967	0.1891	8.45941	2.6874e-17	1.47426e-14
Dusp5	1877.94	1.58931	0.445976	3.56368	0.000365696	0.00956773
Tent5c	229.28	1.58837	0.385437	4.12095	3.77306e-05	0.0014683
Cda	675.055	1.58395	0.426144	3.71693	0.000201662	0.00592533
Plscr2	401.889	1.58226	0.362106	4.36959	1.24477e-05	0.000601381
Zfp783	35.3407	1.58225	0.531548	2.97669	0.00291382	0.0455445
Slc7a5	1269.18	1.58107	0.32206	4.90925	9.1427e-07	7.06731e-05
Cfl2	1510.54	1.56957	0.189454	8.28471	1.18394e-16	5.90217e-14
Plb1	1266.46	1.56939	0.398531	3.93793	8.21869e-05	0.00279233
Dock9	510.637	1.56831	0.20226	7.75393	8.90899e-15	3.29239e-12
Derl3	95.7514	1.55897	0.409509	3.80694	0.000140699	0.00434251
Shisa4	207.187	1.55549	0.489757	3.17604	0.00149301	0.0283057
Auts2	806.927	1.55059	0.361993	4.28348	1.83995e-05	0.000821266
1700025G04Rik	1541.18	1.53933	0.297732	5.17018	2.33868e-07	2.11551e-05
Sox10	918.097	1.53818	0.523162	2.94015	0.00328049	0.0496358
Rassf4	785.362	1.53512	0.424406	3.6171	0.00029792	0.0081585
Txnip	527.879	1.53469	0.457159	3.35701	0.000787907	0.0175842
Rorc	178.888	1.52988	0.50455	3.03216	0.00242813	0.0399791
Nfatc2	117.324	1.52309	0.385959	3.94624	7.93884e-05	0.002711
Cdc45	741.053	1.5209	0.411144	3.69919	0.000216286	0.00628065
Vsir	395.631	1.5197	0.382259	3.97557	7.02119e-05	0.00244677
Nhsl1	1119.23	1.51649	0.495423	3.061	0.00220597	0.0373652
Atp11a	1421.9	1.51503	0.302305	5.01159	5.39818e-07	4.35078e-05
Chd3	980.913	1.51466	0.273865	5.53067	3.19005e-08	3.80411e-06
Anxa9	109.47	1.5034	0.429407	3.50111	0.000463319	0.0114357
Pitpnc1	449.87	1.50224	0.428989	3.50182	0.000462094	0.0114357
Ddo	210.775	1.49818	0.412914	3.62831	0.000285281	0.00788861
Cep85	2065.64	1.49471	0.480401	3.11138	0.00186217	0.0334051
Etv1	208.362	1.49157	0.501405	2.97479	0.00293192	0.0457014
Kcnk5	352.549	1.47396	0.422717	3.48687	0.000488713	0.0119929
Cald1	7891.27	1.46771	0.428084	3.42856	0.000606787	0.0142725
Hyi	269.118	1.4659	0.465685	3.14784	0.00164479	0.0305364
Epb41l4a	1321.42	1.46058	0.411091	3.55293	0.000380971	0.00976667
Etv4	350.432	1.45963	0.42787	3.41139	0.000646322	0.0150566
S100a1	5278.77	1.45365	0.302798	4.80072	1.58094e-06	0.000112023
Ccdc141	232.625	1.45257	0.454508	3.19591	0.0013939	0.0268152
Gm21897	35.7905	1.44229	0.46019	3.13413	0.00172364	0.0316547
Rhpn2	334.883	1.44227	0.441326	3.26804	0.00108296	0.0220298
P3h4	2731.63	1.43809	0.391169	3.67639	0.000236554	0.00674974
Rec114	230.996	1.43505	0.3528	4.0676	4.74996e-05	0.00175223
Lyst	161.681	1.42441	0.340769	4.18	2.91509e-05	0.00119623
Ptrh1	368.004	1.42377	0.300679	4.73519	2.18854e-06	0.000146529
Tnik	505.651	1.42146	0.400856	3.54606	0.000391033	0.00995494
Pecam1	148.434	1.41514	0.430826	3.28471	0.00102086	0.0212494
Lig3	1017.31	1.41389	0.32205	4.39029	1.13202e-05	0.00056621
Chl1	413.56	1.41272	0.412007	3.42888	0.000606068	0.0142725
Arhgap28	221.307	1.40069	0.273601	5.11946	3.06408e-07	2.68596e-05
Cp	9212.07	1.39449	0.335519	4.1562	3.23578e-05	0.00131018
Dock4	80.5624	1.39307	0.340437	4.09202	4.27633e-05	0.00161249
Aldoc	3419.66	1.39139	0.251598	5.53019	3.1988e-08	3.80411e-06
Cdo1	2142.39	1.3879	0.356371	3.89452	9.83917e-05	0.00321161
Palld	3559.52	1.3835	0.426577	3.24327	0.00118168	0.0236698
Slc6a8	741.604	1.38038	0.286575	4.81683	1.45854e-06	0.000104658
Tead1	369.752	1.37853	0.384277	3.58734	0.000334066	0.00889064
Sash1	372.502	1.3749	0.466754	2.94566	0.0032227	0.0491896
Mtss1l	103.893	1.37262	0.320873	4.27777	1.88773e-05	0.000833838
Zfp579	173.651	1.37254	0.310123	4.42578	9.60954e-06	0.000498231
Trf	75658.6	1.36884	0.459702	2.97766	0.00290455	0.0454414
Slc1a5	2317.41	1.36826	0.281649	4.85803	1.18558e-06	8.77283e-05
Fbxo32	607.707	1.36796	0.359802	3.80197	0.000143549	0.0044065
Slc45a3	654.344	1.36784	0.359536	3.80445	0.000142117	0.00437042
Ccn2	7354.09	1.36783	0.236139	5.79247	6.93591e-09	9.6682e-07
Pbx1	715.274	1.36515	0.369056	3.69903	0.000216421	0.00628065
Repin1	267.269	1.35643	0.456403	2.972	0.00295869	0.0459502
Glis2	155.853	1.35572	0.418883	3.23652	0.00120997	0.0240945
Ddit3	1025.47	1.35275	0.348131	3.88576	0.000102012	0.00330441
Arhgap8	474.56	1.3522	0.229013	5.90449	3.5375e-09	5.4197e-07
Syt12	408.853	1.352	0.362574	3.72891	0.000192312	0.00567789
Prkce	105.067	1.35116	0.449607	3.00521	0.00265397	0.0426995
Krt8	78806.2	1.34887	0.418038	3.22666	0.00125242	0.0247101
Tuba4a	12836.8	1.34591	0.240529	5.59562	2.19829e-08	2.81084e-06
Pde7b	79.1076	1.34096	0.40899	3.27871	0.00104283	0.0214222
Acsl1	449.209	1.32536	0.406215	3.2627	0.00110356	0.0223951
Flvcr1	239.016	1.32436	0.358924	3.6898	0.000224428	0.00646884
Csrp1	10227.1	1.31301	0.285766	4.59471	4.3335e-06	0.000263198
Gm3636	51.4377	1.30768	0.361957	3.6128	0.000302905	0.00825513
Tpm2	8344.13	1.30524	0.419389	3.11223	0.00185679	0.033379
Fblim1	1407	1.28745	0.262417	4.9061	9.29035e-07	7.14894e-05
Msrb3	1837.9	1.28352	0.40756	3.14928	0.00163673	0.0304533
Plet1	5732.97	1.28058	0.393436	3.25486	0.00113447	0.0228587
Invs	101.367	1.27526	0.415727	3.06753	0.00215835	0.0367785
Sestd1	945.189	1.27289	0.414623	3.06999	0.00214063	0.0366602
Cavin2	813.343	1.27282	0.424106	3.00118	0.00268938	0.0430656
Zfp36l2	2149.35	1.27079	0.286075	4.44216	8.90595e-06	0.000467453
Slx4	85.0151	1.26094	0.376549	3.34867	0.000812006	0.018017
Mgat4a	483.193	1.25727	0.353305	3.55859	0.000372858	0.00966588
Slc25a29	445.835	1.25208	0.408776	3.06299	0.00219134	0.0371545
Rnasel	88.265	1.24811	0.424354	2.94119	0.00326952	0.0495999
Cnn2	5986.56	1.24107	0.35606	3.48556	0.000491114	0.0120298
Traf1	161.388	1.23663	0.369715	3.34482	0.000823368	0.0181847
2310061I04Rik	410.946	1.23554	0.289688	4.26507	1.99836e-05	0.000871385
Gm9973	972.317	1.22131	0.284219	4.29707	1.73074e-05	0.000783819
Heg1	412.24	1.21122	0.297604	4.06992	4.703e-05	0.00174202
Pde4d	252.253	1.20225	0.285135	4.21642	2.48216e-05	0.00104714
Plpbp	1419.96	1.20156	0.217675	5.51999	3.3902e-08	3.97612e-06
Ifitm10	1207.6	1.20075	0.295911	4.05782	4.95333e-05	0.00181544
Slc29a3	360.753	1.20002	0.221116	5.42713	5.72677e-08	6.16389e-06
Msrb1	847.357	1.19085	0.389912	3.05415	0.00225699	0.03804
Cmas	2883.52	1.17953	0.385023	3.06353	0.00218743	0.0371252
Ndst1	680.62	1.163	0.221351	5.2541	1.48751e-07	1.41321e-05
Itpr1	351.281	1.16186	0.364348	3.18887	0.00142828	0.0272302
Fam110a	2172.49	1.15801	0.299217	3.87014	0.000108773	0.00349601
Gkap1	183.691	1.15362	0.320172	3.60313	0.000314405	0.00846008
Evl	250.594	1.12929	0.350901	3.21824	0.00128978	0.0251537
4931406P16Rik	393.366	1.12507	0.31159	3.61074	0.000305323	0.00830771
Alpk1	116.909	1.10926	0.301882	3.67448	0.000238335	0.00678914
Mex3a	183.283	1.10738	0.317732	3.48528	0.000491631	0.0120298
Cntrob	199.736	1.1068	0.300682	3.68096	0.000232358	0.00664115
Dpm2	2102.55	1.10259	0.244434	4.51081	6.45795e-06	0.00036608
Plpp2	2727.46	1.09818	0.277906	3.95162	7.76228e-05	0.00265604
Nt5c3b	1539.73	1.09786	0.250511	4.38247	1.17341e-05	0.00058009
Aig1	1720.83	1.09607	0.267347	4.09979	4.13525e-05	0.00156973
Ifnlr1	239.684	1.08779	0.321281	3.38579	0.000709735	0.0162446
Eppk1	545.811	1.08361	0.345597	3.13547	0.0017158	0.0315448
Taf1d	1382.08	1.07981	0.251944	4.28589	1.82007e-05	0.000814529
Lipt2	185.689	1.07654	0.34611	3.11041	0.00186828	0.0334794
Fads3	919.43	1.07112	0.357565	2.9956	0.00273908	0.0436149
Trib3	467.599	1.07092	0.258417	4.14416	3.41055e-05	0.00136792
Gm20458	111.694	1.06957	0.353427	3.02628	0.00247584	0.0404549
Pald1	299.574	1.06708	0.214268	4.9801	6.35498e-07	5.09778e-05
C1qtnf1	334.021	1.0635	0.317255	3.3522	0.00080171	0.0178454
Tmem98	924.331	1.0618	0.341917	3.10543	0.00190002	0.0337989
Gstp1	6574.36	1.05993	0.247673	4.27957	1.87256e-05	0.000829291
Stk39	1334.89	1.05804	0.341536	3.0979	0.00194897	0.0343217
Gm15280	174.25	1.04694	0.269413	3.886	0.000101909	0.00330441
Tpt1	11688.6	1.04172	0.292169	3.56548	0.000363186	0.00953139
Ltbp3	1960.31	1.03186	0.305012	3.383	0.000716979	0.0163664
Synpo	560.84	1.03115	0.289934	3.55649	0.000375838	0.00971352
Fbxw7	349.171	1.03104	0.317168	3.25078	0.00115088	0.0231346
Large1	190.173	1.02691	0.281042	3.65395	0.000258233	0.00724672
Vav2	167.062	1.02629	0.25851	3.97003	7.18639e-05	0.00249412
Elovl1	3893.79	1.01936	0.158654	6.42503	1.31841e-10	2.51921e-08
Rai1	216.535	1.01413	0.309149	3.28039	0.00103664	0.0213714
Pemt	97.4237	1.01358	0.320379	3.16368	0.00155786	0.0292739
Myh9	1400.38	1.01233	0.329562	3.07175	0.00212805	0.0365182
Foxj2	377.348	1.01147	0.342468	2.95347	0.00314227	0.0484036
Wwc1	678.074	1.00972	0.336171	3.00358	0.0026682	0.0428474
Per1	618.793	1.00874	0.248474	4.05975	4.91248e-05	0.00180435
Gstk1	867.48	1.0083	0.331695	3.03986	0.00236688	0.0394233
Gtf3c1	647.396	1.00076	0.223554	4.4766	7.58418e-06	0.000411082
Psph	1014.34	-1.00467	0.296672	-3.38648	0.000707956	0.0162257
G6pdx	1873.73	-1.01021	0.28712	-3.51842	0.000434118	0.0109049
Dnaja4	863.424	-1.01517	0.319966	-3.17274	0.0015101	0.0285025
Mterf2	65.4147	-1.02757	0.338511	-3.03556	0.00240088	0.0397947
Nbl1	1690.47	-1.03599	0.346207	-2.9924	0.00276791	0.0439148
Asb13	442.802	-1.03825	0.294127	-3.52994	0.000415653	0.0104875
Hscb	321.216	-1.04423	0.335966	-3.10813	0.00188273	0.033632
Slc39a6	938.427	-1.04606	0.327008	-3.19889	0.00137958	0.0266343
Procr	158.598	-1.05715	0.339354	-3.1152	0.0018382	0.0331149
Tmem54	743.635	-1.09954	0.244885	-4.49002	7.12157e-06	0.000394493
Bpgm	1174.51	-1.10099	0.343211	-3.20791	0.00133703	0.0259858
Spsb1	640.689	-1.10506	0.364421	-3.03237	0.00242644	0.0399791
S100a14	1695.46	-1.1158	0.362911	-3.07457	0.00210807	0.0362852
Pon3	414.919	-1.12051	0.250663	-4.47018	7.81553e-06	0.000420604
Tln2	260.859	-1.12062	0.379334	-2.95417	0.00313506	0.0483362
Rhbdl2	371.225	-1.13104	0.368951	-3.06555	0.00217269	0.0369488
Dynlt3	2362.1	-1.13223	0.369195	-3.06674	0.00216404	0.0368385
Mettl7a1	222.33	-1.14226	0.300204	-3.80493	0.000141846	0.00437
Lrrc8e	175.132	-1.14261	0.330663	-3.4555	0.000549265	0.0132119
Cdkn2c	240.18	-1.15305	0.295489	-3.90218	9.53317e-05	0.00314188
Cdkl3	143.635	-1.15338	0.260361	-4.42993	9.42632e-06	0.00049173
Zcchc10	339.435	-1.16199	0.352562	-3.29585	0.000981251	0.020632
Marveld1	706.235	-1.17064	0.324531	-3.60716	0.000309567	0.00837835
2024-09-10	203.933	-1.17589	0.34579	-3.40059	0.000672399	0.0155788
Katnal1	100.016	-1.18726	0.389542	-3.04784	0.00230496	0.0386951
Tubd1	124.604	-1.18928	0.305356	-3.89473	9.83062e-05	0.00321161
Setdb2	229.752	-1.19423	0.357998	-3.33585	0.000850377	0.0185975
Plcb4	120.347	-1.19777	0.356148	-3.36314	0.000770623	0.017312
Lypd3	4110.36	-1.20699	0.34322	-3.51666	0.000437019	0.0109616
Pdlim2	795.428	-1.20812	0.390558	-3.09333	0.00197924	0.0344867
Cpxm2	676.89	-1.20867	0.298657	-4.047	5.18774e-05	0.00188435
Reep6	495.061	-1.20915	0.389985	-3.1005	0.00193193	0.0341522
Maoa	864.087	-1.21753	0.393109	-3.09719	0.00195363	0.0343217
Ggct	395.285	-1.22867	0.32395	-3.79277	0.000148978	0.00453223
Cryz	278.657	-1.22981	0.283081	-4.34439	1.39664e-05	0.000667171
Dzip1l	159.469	-1.23785	0.3941	-3.14095	0.001684	0.0310337
Mreg	108.803	-1.24205	0.410953	-3.02237	0.002508	0.0408535
Fam84a	2134.45	-1.25365	0.383002	-3.27322	0.00106331	0.0217339
Depdc7	214.422	-1.26855	0.395926	-3.20402	0.00135522	0.0262492
Perp	13129.9	-1.27322	0.359451	-3.54214	0.000396898	0.0100591
Gm14295	132.104	-1.28054	0.380658	-3.36401	0.000768192	0.0172803
Parp3	397.798	-1.28108	0.235411	-5.44187	5.27254e-08	5.86044e-06
Myb	701.11	-1.28703	0.403369	-3.1907	0.00141928	0.027099
Tgfbi	467.992	-1.28901	0.429749	-2.99946	0.00270462	0.0432689
Foxa1	778.406	-1.29741	0.36432	-3.56117	0.0003692	0.00961503
Eva1a	371.876	-1.30702	0.364557	-3.58524	0.000336766	0.00893455
Slc35d2	216.228	-1.32582	0.416021	-3.18692	0.00143797	0.0273842
Rgcc	2132.88	-1.33317	0.399936	-3.33346	0.000857728	0.0187007
Rdh10	1849.8	-1.33682	0.284032	-4.7066	2.51883e-06	0.000164751
Scamp5	61.3616	-1.35995	0.401185	-3.38984	0.000699347	0.0160935
Phgdh	1261.15	-1.36051	0.337805	-4.0275	5.63731e-05	0.00201828
Txn2	2321.27	-1.36452	0.241981	-5.63897	1.71066e-08	2.25515e-06
Plxdc1	387.827	-1.36487	0.444178	-3.0728	0.0021206	0.0364273
Avpi1	3213.23	-1.3803	0.388526	-3.55267	0.00038134	0.00976667
Adam8	531.725	-1.39454	0.447106	-3.11904	0.00181443	0.032813
Akr1b3	4291.28	-1.3984	0.338498	-4.1312	3.60878e-05	0.00141734
Insl6	1026.88	-1.40042	0.413496	-3.38678	0.000707176	0.0162257
Homer2	461.632	-1.40096	0.391866	-3.57511	0.000350076	0.00923007
Gsdmd	265.928	-1.4117	0.383412	-3.68194	0.000231463	0.00662669
Plbd1	403.002	-1.43031	0.452082	-3.16383	0.00155709	0.0292739
Adora2b	72.2568	-1.43453	0.384485	-3.73105	0.000190681	0.00563952
Rassf6	186.561	-1.43996	0.487263	-2.9552	0.0031247	0.0482202
Tmem266	52.0438	-1.44998	0.484199	-2.9946	0.00274801	0.0437162
Pop1	75.0295	-1.45463	0.417435	-3.48469	0.000492711	0.0120389
Ust	118.704	-1.46322	0.481617	-3.03814	0.00238044	0.0396103
Serpina3i	272.568	-1.46609	0.335221	-4.37348	1.22279e-05	0.000593924
Map2k6	89.9182	-1.46847	0.42279	-3.4733	0.000514109	0.0124721
Hif1a	2368.46	-1.46941	0.453142	-3.24271	0.00118399	0.0236706
C1ra	391.946	-1.47618	0.479582	-3.07807	0.00208349	0.035935
Snx24	179.632	-1.48119	0.412194	-3.59343	0.000326357	0.00871276
Sowahc	123.926	-1.48383	0.418182	-3.54829	0.00038774	0.00988593
Steap1	239.588	-1.48732	0.338455	-4.39445	1.11055e-05	0.000557814
Fam198b	217.571	-1.48891	0.491962	-3.02647	0.0024743	0.0404549
Thbs3	99.267	-1.49336	0.422785	-3.53219	0.000412128	0.010414
Rnf208	121.687	-1.49384	0.367085	-4.06947	4.71204e-05	0.00174202
Stard13	107.671	-1.49465	0.386901	-3.86314	0.00011194	0.00356489
Megf9	410.746	-1.4995	0.505087	-2.96879	0.00298978	0.046264
Hist2h2be	46.6709	-1.50239	0.476461	-3.15323	0.00161476	0.0301435
Grb10	366.599	-1.50457	0.49492	-3.04003	0.00236556	0.0394233
Hopx	249.853	-1.50633	0.486884	-3.09382	0.00197599	0.0344746
Glipr1	158.846	-1.50701	0.489375	-3.07946	0.00207375	0.0358762
Fam43a	307.355	-1.51143	0.343282	-4.40289	1.06819e-05	0.000542259
Alcam	2318.34	-1.51353	0.454097	-3.33305	0.000859	0.0187044
Sqor	508.868	-1.52872	0.443348	-3.44812	0.000564499	0.0135019
Hexa	907.221	-1.54015	0.363826	-4.23322	2.30369e-05	0.000979414
Ccdc71l	792.699	-1.54177	0.475224	-3.24431	0.00117737	0.0236112
Serpina3h	137.434	-1.54665	0.34264	-4.51393	6.36385e-06	0.000361952
P2ry1	216.506	-1.54705	0.520007	-2.97506	0.00292933	0.0457014
Angptl2	807.272	-1.54857	0.42563	-3.6383	0.000274439	0.00765101
Tmem45a	509.681	-1.5506	0.459711	-3.373	0.000743536	0.0168594
Tmem140	585.969	-1.55661	0.334418	-4.65468	3.24482e-06	0.000205901
Akr1b8	1466.48	-1.56137	0.47712	-3.27249	0.00106603	0.0217634
Matn2	1293.61	-1.5743	0.499319	-3.1529	0.00161656	0.0301439
Oaf	1642.99	-1.57501	0.426003	-3.69719	0.000218001	0.00630497
Sh2d4a	280.406	-1.57555	0.472929	-3.33146	0.000863904	0.0187631
Cyp2s1	117.282	-1.57661	0.436854	-3.60901	0.000307372	0.00833678
Htra1	2722.68	-1.57776	0.353482	-4.46348	8.0638e-06	0.000431236
H2-DMb2	79.8281	-1.58377	0.482842	-3.2801	0.00103771	0.0213714
Dbp	634.205	-1.58712	0.465477	-3.40968	0.000650401	0.0151305
Cdc42ep5	450.021	-1.58769	0.457221	-3.47249	0.000515663	0.012492
Zfp773	172.04	-1.58962	0.504367	-3.15172	0.00162312	0.030233
Esr1	403.21	-1.59248	0.433688	-3.67193	0.000240722	0.00684569
Fam174b	134.511	-1.59435	0.506331	-3.14882	0.00163932	0.0304681
Il1r1	239.886	-1.60735	0.398235	-4.03619	5.43264e-05	0.00195736
Casq2	251.322	-1.60848	0.545951	-2.9462	0.00321704	0.0491896
Amer2	62.8139	-1.61142	0.504908	-3.19151	0.00141533	0.0270969
Cyp7b1	140.538	-1.61753	0.522767	-3.09417	0.00197363	0.0344746
Tchh	226.939	-1.62596	0.434041	-3.74609	0.000179614	0.00537766
Cyp27a1	103.447	-1.63853	0.364907	-4.49027	7.11339e-06	0.000394493
Olfml3	1251.4	-1.64191	0.438573	-3.74375	0.000181294	0.00541844
Mns1	68.5159	-1.64465	0.554929	-2.96372	0.00303947	0.0469903
Epha4	212.051	-1.6599	0.515333	-3.22103	0.00127732	0.0249966
Pir	531.044	-1.65993	0.404727	-4.10135	4.10748e-05	0.00156618
Kcnk7	72.1655	-1.69494	0.462713	-3.66304	0.000249236	0.00704072
Gltp	2001.23	-1.70921	0.387957	-4.40567	1.05459e-05	0.000536959
Gsto1	12357.8	-1.71375	0.540041	-3.17337	0.00150682	0.0284809
Steap2	198.244	-1.71753	0.319159	-5.3814	7.39068e-08	7.71079e-06
Dsc2	1397.09	-1.72175	0.565795	-3.04306	0.00234186	0.0391984
Areg	1522.14	-1.73701	0.580152	-2.99405	0.00275297	0.0437542
Svip	65.6824	-1.74004	0.488594	-3.56132	0.000368996	0.00961503
C1qtnf6	416.388	-1.75236	0.544353	-3.21916	0.00128566	0.025102
Pparg	53.4039	-1.76856	0.49792	-3.55191	0.00038245	0.00978037
Mfap3l	281.683	-1.77474	0.402234	-4.4122	1.02324e-05	0.000524134
Aldh3b2	235.269	-1.78043	0.528355	-3.36977	0.000752315	0.0170131
Steap4	3298.62	-1.78332	0.449616	-3.96631	7.29935e-05	0.0025179
Fgl1	120.313	-1.79792	0.410162	-4.38343	1.16825e-05	0.00057922
Lrrc32	167.702	-1.79815	0.39235	-4.58301	4.58329e-06	0.000277379
Gsto2	59.9673	-1.80779	0.56134	-3.22048	0.00127974	0.0250153
BC030870	79.6519	-1.8333	0.621841	-2.94818	0.00319653	0.0490173
Saa3	561.835	-1.83805	0.519116	-3.54074	0.000399008	0.0100975
Clec4b1	26.0032	-1.84345	0.607942	-3.03228	0.00242711	0.0399791
Olfml2b	247.807	-1.84813	0.435417	-4.24451	2.19069e-05	0.000938409
Gsn	8834.71	-1.85182	0.357748	-5.17633	2.26294e-07	2.06901e-05
Cdh13	565.085	-1.85996	0.437222	-4.25404	2.09945e-05	0.000903889
Nrep	1375.31	-1.87721	0.445266	-4.21592	2.48761e-05	0.00104714
Sptlc3	374.351	-1.8889	0.436737	-4.32503	1.52511e-05	0.000713849
Lpar1	295.417	-1.88944	0.567806	-3.32762	0.000875914	0.0189514
Coro6	47.7581	-1.89102	0.571747	-3.30744	0.000941516	0.0199252
Serpinb8	196.424	-1.89527	0.377224	-5.02424	5.05433e-07	4.11263e-05
Nckap5	65.8678	-1.89976	0.555987	-3.41692	0.000633349	0.0148357
Vsnl1	73.6153	-1.90347	0.626596	-3.0378	0.00238314	0.0396165
R3hdml	728.46	-1.91321	0.539011	-3.54949	0.000385982	0.00985587
Paqr5	153.118	-1.92832	0.589448	-3.2714	0.00107018	0.0218219
Fmo1	273.68	-1.94367	0.317103	-6.12945	8.81837e-10	1.4848e-07
Gipc2	1179.57	-1.94474	0.53098	-3.66254	0.000249724	0.0070428
Nr2f2	90.2946	-1.9513	0.559032	-3.49049	0.000482135	0.0118485
Il33	22653.6	-1.95379	0.504658	-3.87151	0.000108164	0.00348378
Ereg	74.715	-1.96588	0.609263	-3.22665	0.0012525	0.0247101
Plac8	771.553	-1.96788	0.549226	-3.58301	0.000339659	0.00899725
Fggy	249.957	-1.98371	0.264282	-7.50607	6.09306e-14	1.95507e-11
Cela1	58.6442	-1.99193	0.415382	-4.7954	1.62348e-06	0.000113617
Dcn	8884.65	-2.00237	0.605637	-3.30623	0.000945615	0.0199766
Bpifc	130.056	-2.00585	0.576054	-3.48206	0.000497576	0.0121403
Fmo2	219.952	-2.00869	0.683191	-2.94016	0.00328041	0.0496358
Pnp2	40.1054	-2.01358	0.550244	-3.65944	0.00025277	0.00711688
Serpina3f	48.5961	-2.01971	0.4923	-4.1026	4.08525e-05	0.00156121
B4galt5	107.648	-2.02033	0.489403	-4.12815	3.65686e-05	0.00143292
Vegfd	79.3677	-2.0304	0.490222	-4.14179	3.44601e-05	0.00137213
Mgst2	556.54	-2.04025	0.604683	-3.37408	0.000740626	0.0168346
Fbn2	208.351	-2.04741	0.634881	-3.22488	0.00126027	0.024783
Adamts2	656.413	-2.05667	0.627419	-3.27798	0.00104554	0.0214222
Ddr2	281.773	-2.06672	0.380759	-5.4279	5.70221e-08	6.16389e-06
Pdgfra	288.547	-2.07637	0.658093	-3.15513	0.00160427	0.0299804
Fez1	118.461	-2.08994	0.687421	-3.04027	0.00236368	0.0394233
Meis1	254.597	-2.09008	0.32134	-6.50425	7.80799e-11	1.54398e-08
Fabp3	37.2472	-2.0929	0.637029	-3.2854	0.00101837	0.0212236
Ar	177.227	-2.09365	0.487969	-4.29053	1.78251e-05	0.00080194
Pthlh	1502.08	-2.10006	0.703626	-2.98462	0.00283926	0.0446252
Ly6d	43304.5	-2.11214	0.500887	-4.2168	2.47798e-05	0.00104714
Kcns3	104.919	-2.13338	0.493696	-4.32124	1.55153e-05	0.000720911
Abi3bp	88.1577	-2.14647	0.627234	-3.42213	0.000621331	0.0145944
Sprr1a	6786.37	-2.15432	0.446951	-4.82004	1.43529e-06	0.000103699
Dcaf12l1	66.8941	-2.15767	0.703117	-3.06872	0.00214977	0.0367105
Rarres2	175.017	-2.15807	0.707226	-3.05146	0.00227735	0.0382693
Gxylt2	187.916	-2.15951	0.558972	-3.86336	0.000111837	0.00356489
Cdkn2a	306.669	-2.16728	0.419939	-5.16094	2.45715e-07	2.19928e-05
Has2	551.464	-2.17213	0.605837	-3.58533	0.000336654	0.00893455
Sox15	357.019	-2.18397	0.631326	-3.45933	0.000541518	0.013044
Spon1	693.531	-2.18421	0.532065	-4.10516	4.04041e-05	0.00154755
Pi16	56.2454	-2.18458	0.512065	-4.2662	1.98828e-05	0.000869219
Serpinb2	62.2514	-2.19271	0.733406	-2.98977	0.0027919	0.0440376
Pls1	195.212	-2.20861	0.567291	-3.89326	9.89054e-05	0.00322219
Pdgfrb	404.518	-2.2115	0.739681	-2.98981	0.00279152	0.0440376
Col27a1	63.2291	-2.22476	0.701091	-3.17328	0.00150728	0.0284809
Acsbg1	645.527	-2.24364	0.725219	-3.09374	0.00197652	0.0344746
Gm266	52.7259	-2.24521	0.671085	-3.34564	0.000820928	0.0181544
Tmem45b	60.491	-2.24881	0.590659	-3.80729	0.000140496	0.00434251
Retnla	288.278	-2.2578	0.524229	-4.30689	1.65563e-05	0.000758912
Ndufa4l2	1335.86	-2.26799	0.460279	-4.92742	8.33206e-07	6.48327e-05
Agtr1a	195.044	-2.27002	0.581665	-3.90262	9.51571e-05	0.00314188
Prr9	121.726	-2.28049	0.70536	-3.23308	0.00122463	0.0242729
Tslp	177.943	-2.28682	0.501124	-4.56338	5.03365e-06	0.00029723
Serping1	1729.99	-2.30814	0.570754	-4.04402	5.25433e-05	0.00190117
Stmn2	67.8388	-2.31102	0.696301	-3.31899	0.000903427	0.0193645
Aldh3a1	658.336	-2.3214	0.566175	-4.10014	4.12901e-05	0.00156973
Padi3	55.7466	-2.32537	0.773574	-3.006	0.00264706	0.0426287
Igf2bp2	138.433	-2.32875	0.56678	-4.10873	3.97833e-05	0.00153067
Papss2	107.922	-2.33084	0.632124	-3.68732	0.00022663	0.00651025
Tenm4	234.945	-2.33664	0.484829	-4.81951	1.43908e-06	0.000103699
Emilin2	112.849	-2.33873	0.665517	-3.51415	0.000441159	0.0110167
Mycl	235.344	-2.33934	0.434099	-5.38896	7.08652e-08	7.4391e-06
Ppp1r14c	499.302	-2.354	0.671451	-3.50583	0.000455184	0.011317
Gjb5	66.764	-2.37002	0.677593	-3.4977	0.000469289	0.0115663
Rarres1	179.836	-2.38612	0.569103	-4.19277	2.75571e-05	0.00114847
Serpina3g	262.722	-2.3912	0.362025	-6.60508	3.97295e-11	8.4455e-09
Aspa	87.8887	-2.41076	0.735411	-3.27811	0.00104504	0.0214222
Efemp1	63.6491	-2.41193	0.798587	-3.02025	0.00252567	0.0410995
Thy1	338.536	-2.41979	0.733189	-3.30036	0.000965612	0.0203737
Egflam	135.043	-2.44553	0.735607	-3.32451	0.000885746	0.019043
Mgl2	166.417	-2.45074	0.445073	-5.50637	3.66306e-08	4.20906e-06
BC100530	911.678	-2.47476	0.360061	-6.87316	6.27936e-12	1.54764e-09
Larp6	69.6234	-2.4767	0.754826	-3.28115	0.00103384	0.0213714
Sprr1b	42.4662	-2.48903	0.518869	-4.79703	1.61032e-06	0.000113617
Atp1b1	2519.5	-2.49627	0.476498	-5.23879	1.61636e-07	1.52711e-05
Epgn	549.399	-2.49723	0.780389	-3.19998	0.00137436	0.0265897
Clic3	176.319	-2.50461	0.558805	-4.48208	7.39195e-06	0.000405508
Tnfrsf19	359.876	-2.51033	0.456171	-5.50304	3.73291e-08	4.26052e-06
Fgfbp1	762.067	-2.51052	0.708351	-3.54417	0.000393846	0.0100116
Samd12	273.774	-2.55217	0.583238	-4.37586	1.20954e-05	0.000591076
Slc14a1	81.0015	-2.56578	0.721935	-3.55404	0.000379365	0.00975485
Rab38	351.465	-2.57993	0.386642	-6.67267	2.51192e-11	5.54776e-09
Lyz1	18.9088	-2.58147	0.715948	-3.60567	0.000311348	0.00839111
Ttc6	284.966	-2.58943	0.304608	-8.50084	1.88226e-17	1.06699e-14
Dmkn	5824.99	-2.62914	0.627331	-4.191	2.77732e-05	0.00114918
Cyp3a57	174.842	-2.6437	0.850093	-3.10989	0.00187156	0.0335029
Slc23a1	73.687	-2.64698	0.628075	-4.21442	2.50417e-05	0.00105151
Cyp4f39	153.348	-2.66695	0.654744	-4.07326	4.6359e-05	0.00172946
Cysrt1	189.881	-2.66793	0.737788	-3.61612	0.000299051	0.00817631
Krt16	2098.87	-2.67571	0.331287	-8.07671	6.65381e-16	2.9014e-13
Heyl	118.32	-2.68325	0.75458	-3.55596	0.000376605	0.00971858
Ebf1	248.766	-2.68893	0.804945	-3.34051	0.000836236	0.0183734
Mst1r	64.3269	-2.69242	0.748095	-3.59903	0.000319405	0.00856752
Scnn1g	107.904	-2.69924	0.52182	-5.17274	2.30686e-07	2.09789e-05
Tfpi2	148.465	-2.70548	0.759979	-3.55994	0.000370936	0.00964546
Fam83c	103.123	-2.70551	0.866262	-3.12321	0.00178893	0.0325027
Prrx2	251.884	-2.70748	0.775056	-3.49327	0.000477138	0.0117427
Foxs1	71.8204	-2.71157	0.896028	-3.02621	0.0024764	0.0404549
Alox12	1060.05	-2.71899	0.703708	-3.8638	0.000111637	0.00356489
Dlx5	89.4699	-2.72113	0.541247	-5.02752	4.96855e-07	4.08189e-05
Duoxa1	501.716	-2.73265	0.621881	-4.39417	1.11196e-05	0.000557814
Mst1	159.807	-2.73594	0.739493	-3.69975	0.000215808	0.00628065
Col15a1	143.052	-2.73624	0.813796	-3.36231	0.000772933	0.0173182
Rasgrf1	347.442	-2.74752	0.87815	-3.12876	0.00175544	0.0320833
Lama2	86.1254	-2.7495	0.845594	-3.25155	0.00114776	0.0230991
Col26a1	41.0457	-2.75956	0.819065	-3.36916	0.000753964	0.0170278
Lhfpl1	74.2462	-2.77316	0.588316	-4.71373	2.43225e-06	0.000160321
Tmem238l	25.6694	-2.78162	0.702415	-3.96008	7.49241e-05	0.00257927
Ccdc113	19.3468	-2.78775	0.840102	-3.31835	0.000905514	0.01937
Cd209a	70.5537	-2.79684	0.676285	-4.13559	3.5404e-05	0.00140019
Pnliprp1	29.1678	-2.80259	0.83374	-3.36147	0.000775278	0.0173479
Tmem100	82.0453	-2.80687	0.764925	-3.66948	0.000243048	0.00688879
S1pr3	825.06	-2.82956	0.527398	-5.36513	8.08918e-08	8.30876e-06
Lrrc17	259.375	-2.83098	0.591493	-4.78615	1.70011e-06	0.000118008
Dcpp3	152.544	-2.83729	0.852545	-3.32803	0.000874639	0.0189479
Rbm24	77.6608	-2.84348	0.78232	-3.63468	0.000278325	0.00772364
Smim5	61.1859	-2.84447	0.622135	-4.57212	4.82816e-06	0.00028709
Gpr87	326.278	-2.84798	0.574938	-4.95354	7.28751e-07	5.73757e-05
Notum	110.388	-2.85427	0.747358	-3.81914	0.000133916	0.00418379
Sod3	245.998	-2.8702	0.698974	-4.10631	4.02027e-05	0.00154331
Pcolce	2211.42	-2.8813	0.687396	-4.19162	2.7697e-05	0.00114882
Stra6	331.044	-2.88278	0.290093	-9.93741	2.86167e-23	2.56135e-20
Rem1	64.0083	-2.89049	0.857137	-3.37227	0.000745525	0.016882
Rbp2	36.1865	-2.8919	0.783936	-3.68895	0.000225181	0.00647957
Tnfrsf11b	1561.69	-2.92213	0.76966	-3.79665	0.000146663	0.00449397
Mdk	462.475	-2.92261	0.724571	-4.03358	5.49341e-05	0.00197446
Col5a3	304.186	-2.93685	0.725242	-4.04948	5.13322e-05	0.0018733
Col5a2	1689.21	-2.94529	0.655171	-4.49546	6.94207e-06	0.000388345
Apcdd1	228.231	-2.95648	0.415805	-7.11025	1.15834e-12	3.22929e-10
Dsc3	1500.1	-2.9689	0.64068	-4.63398	3.5871e-06	0.000224273
Plscr4	55.8951	-2.98683	0.910232	-3.28139	0.00103297	0.0213714
Klrb1a	40.8298	-3.01252	0.905903	-3.32544	0.000882793	0.0190276
Gfra4	37.4221	-3.0467	0.661133	-4.60831	4.05961e-06	0.000250137
Bmp3	112.749	-3.04702	0.943821	-3.22839	0.00124491	0.0246276
Cxcl15	287.047	-3.0474	0.901357	-3.38091	0.000722472	0.0164697
Aldh1a2	70.7805	-3.07684	0.522127	-5.8929	3.79485e-09	5.71109e-07
Bmp2	109.852	-3.07915	0.786373	-3.91564	9.01635e-05	0.00300849
Pla1a	264.384	-3.08891	0.764094	-4.04258	5.2866e-05	0.00190879
Dcdc2a	105.222	-3.09083	0.846158	-3.65278	0.000259414	0.00726786
Galnt6	119.453	-3.09094	0.863249	-3.5806	0.000342811	0.00906663
Hpse	60.9456	-3.09438	0.690041	-4.48434	7.31398e-06	0.000402529
Tmem119	473.771	-3.09947	0.70313	-4.4081	1.04282e-05	0.000532557
Fbp1	2447.95	-3.1219	0.678674	-4.6	4.22481e-06	0.000258443
Adh1	42.292	-3.12559	0.724601	-4.31353	1.60666e-05	0.000740457
Ms4a4d	118.299	-3.142	0.752225	-4.17694	2.95454e-05	0.00120493
Ckmt1	1673.46	-3.14529	0.738142	-4.2611	2.03426e-05	0.000884773
Krt6a	8914.4	-3.18069	0.529223	-6.01012	1.85388e-09	2.94646e-07
Serpinb1a	147.739	-3.18159	0.411076	-7.73966	9.96836e-15	3.45963e-12
Krt15	28211.1	-3.19266	0.462293	-6.90614	4.98025e-12	1.26409e-09
Naalad2	60.7841	-3.20204	0.919985	-3.48053	0.000500421	0.0121748
Loxl1	292.822	-3.20293	0.723872	-4.42472	9.65659e-06	0.000499149
Cthrc1	363.347	-3.20432	0.750615	-4.26892	1.96419e-05	0.000861643
Has1	534.027	-3.20877	0.776214	-4.13387	3.56707e-05	0.00140746
Vnn1	50.3992	-3.21955	0.795618	-4.0466	5.19675e-05	0.00188435
4930452B06Rik	93.7725	-3.22937	0.585305	-5.51741	3.44039e-08	4.00735e-06
Pou3f1	389.391	-3.2341	0.752251	-4.29922	1.71397e-05	0.000779352
Bdkrb1	42.7589	-3.23536	0.744901	-4.34335	1.40327e-05	0.000668461
Fap	110.171	-3.25642	0.732033	-4.44846	8.64876e-06	0.000456773
Dpep1	73.4156	-3.25838	1.06989	-3.04553	0.0023227	0.038916
Aim2	60.5915	-3.27523	0.93191	-3.51453	0.000440526	0.0110167
Lpl	419.747	-3.28649	0.558445	-5.88507	3.97879e-09	5.88377e-07
Srpx	289.701	-3.28953	0.77045	-4.26963	1.958e-05	0.000861643
Gsta4	4167.26	-3.29029	0.775091	-4.24504	2.18555e-05	0.000938409
C130026I21Rik	30.249	-3.29043	0.952929	-3.45296	0.000554464	0.0133181
Skint3	92.519	-3.30107	0.931853	-3.54248	0.00039638	0.0100591
Ccl11	177.563	-3.34933	0.684841	-4.89067	1.00494e-06	7.66365e-05
Duox1	155.213	-3.35718	0.852314	-3.9389	8.18568e-05	0.00278969
Aox3	45.082	-3.36897	0.843939	-3.99196	6.55297e-05	0.00228829
Igfbp6	255.969	-3.37186	0.663144	-5.08466	3.68289e-07	3.14729e-05
Lox	294.883	-3.37767	0.717365	-4.70844	2.49622e-06	0.000163902
Snap25	97.2699	-3.38091	0.724454	-4.66685	3.05858e-06	0.00019628
Mmp19	76.6574	-3.43917	1.05579	-3.25744	0.0011242	0.0227327
Mfap5	580.916	-3.43961	0.703841	-4.88691	1.02431e-06	7.7765e-05
Col1a2	6933.48	-3.44618	0.677305	-5.08808	3.61704e-07	3.10664e-05
Clec3b	14.7088	-3.4628	1.08431	-3.19354	0.0014054	0.0269754
Il1r2	621.382	-3.47206	0.813371	-4.26873	1.96588e-05	0.000861643
Colec12	330.801	-3.47433	0.815684	-4.25941	2.04969e-05	0.000886948
Aspn	392.846	-3.49863	0.88935	-3.93391	8.35738e-05	0.00282556
Cxcl5	510.151	-3.51621	0.646571	-5.43824	5.3809e-08	5.94205e-06
Bmp4	42.9935	-3.51681	0.796396	-4.4159	1.0059e-05	0.000516808
Dapl1	553.707	-3.53622	0.547466	-6.45924	1.05228e-10	2.03353e-08
Ccl19	10.5361	-3.63348	1.21434	-2.99215	0.00277019	0.0439148
Fxyd2	2447.32	-3.64562	0.769838	-4.73557	2.18443e-06	0.000146529
Calm4	445.882	-3.65057	0.779132	-4.68543	2.79376e-06	0.000180649
Spock1	57.6426	-3.65369	0.886317	-4.12233	3.75056e-05	0.00146625
Hoxc8	41.3931	-3.67575	0.93362	-3.9371	8.24719e-05	0.00279386
Cilp	235.302	-3.70679	0.533263	-6.95114	3.6234e-12	9.47994e-10
Htra3	259.717	-3.72019	0.570036	-6.52623	6.74469e-11	1.36548e-08
Tgm5	117.303	-3.73995	0.782103	-4.78192	1.7363e-06	0.000119544
Srpx2	241.229	-3.74699	0.812773	-4.61013	4.02415e-06	0.000249762
Fam90a1a	68.4756	-3.74977	0.867074	-4.32462	1.52794e-05	0.000713849
Mcoln2	133.113	-3.81082	0.782368	-4.87087	1.11106e-06	8.39765e-05
Ablim3	99.193	-3.81193	0.579198	-6.58139	4.66067e-11	9.54932e-09
Adam28	81.3668	-3.85548	0.849386	-4.53914	5.64831e-06	0.000328956
Capns2	66.8886	-3.85915	1.03179	-3.74025	0.000183837	0.00547519
9230104L09Rik	25.9971	-3.87003	1.01593	-3.80933	0.000139344	0.00432667
Col6a3	1377.75	-3.87372	0.730008	-5.30641	1.11806e-07	1.09274e-05
Cytl1	14.2555	-3.90501	1.19442	-3.26939	0.0010778	0.0219509
Ogn	38.9523	-3.91971	0.7734	-5.06816	4.01675e-07	3.41544e-05
Smoc2	449.418	-3.93622	0.349728	-11.2551	2.18624e-29	4.64739e-26
Cxcl3	215.879	-3.95651	0.816248	-4.84719	1.25222e-06	9.13956e-05
6030408B16Rik	63.693	-3.97269	0.867833	-4.57771	4.7009e-06	0.000281955
Ctsk	915.479	-3.99367	0.794651	-5.02569	5.01619e-07	4.10122e-05
Fabp6	27.82	-3.99769	0.981588	-4.07268	4.64754e-05	0.00172946
Mfap4	204.469	-4.02361	0.686667	-5.85962	4.63931e-09	6.75544e-07
Tac1	126.678	-4.0254	1.00082	-4.02209	5.76839e-05	0.00204796
Il1rl1	171.547	-4.02548	0.932536	-4.3167	1.58376e-05	0.000731887
Col6a2	1764.05	-4.03418	0.545364	-7.39723	1.39051e-13	4.22269e-11
Flrt2	107.26	-4.0728	0.820932	-4.96119	7.00627e-07	5.5418e-05
Ear2	102.243	-4.07448	0.751536	-5.42154	5.90872e-08	6.31973e-06
Thbs2	1749.77	-4.08418	0.811557	-5.03252	4.84071e-07	3.99617e-05
Col1a1	8868.21	-4.10633	0.697442	-5.8877	3.91603e-09	5.84176e-07
Ccdc80	1180.12	-4.11778	0.767032	-5.36845	7.9415e-08	8.23495e-06
Osr2	50.2699	-4.12013	0.697447	-5.90744	3.47462e-09	5.37176e-07
Krt4	1373.68	-4.13705	0.742193	-5.57409	2.48829e-08	3.11145e-06
Dpt	153.65	-4.18134	0.627306	-6.66555	2.63668e-11	5.74864e-09
Col6a1	3998.57	-4.22149	0.536456	-7.86923	3.56827e-15	1.51705e-12
Lamc3	90.4923	-4.2422	0.898165	-4.72319	2.32172e-06	0.000154836
C1qtnf2	119.457	-4.28754	0.762554	-5.6226	1.881e-08	2.44185e-06
Serpina9	56.1764	-4.28941	1.00218	-4.28008	1.8683e-05	0.000829291
Gsta2	30.933	-4.4118	1.08064	-4.08259	4.45365e-05	0.00167061
Akr1c18	83.1617	-4.42733	0.825278	-5.36466	8.1104e-08	8.30876e-06
Itm2a	1204.27	-4.45628	0.676042	-6.59172	4.34756e-11	9.12772e-09
Ivl	87.4895	-4.46319	0.928504	-4.80686	1.53317e-06	0.000109092
Cpxm1	1129.71	-4.47729	0.709271	-6.31253	2.74508e-10	5.07422e-08
Crabp1	2212.74	-4.48846	0.621787	-7.21865	5.25072e-13	1.56656e-10
Csta1	30.7274	-4.49297	1.19138	-3.77123	0.000162446	0.00491559
Ccn3	88.2191	-4.49992	1.03992	-4.32715	1.51048e-05	0.000709591
Dync1i1	153.701	-4.51444	0.773682	-5.83501	5.37888e-09	7.75197e-07
Gm2564	19.2083	-4.56921	1.01355	-4.50811	6.54076e-06	0.000368318
Penk	268.548	-4.6041	0.840072	-5.4806	4.2389e-08	4.77395e-06
C1qtnf3	270.628	-4.61401	0.841439	-5.48348	4.1704e-08	4.72812e-06
Tspan11	82.2939	-4.64026	0.879222	-5.27769	1.30825e-07	1.24989e-05
Nnmt	416.508	-4.69004	0.779535	-6.01645	1.78282e-09	2.88749e-07
Skint1	109.567	-4.73782	1.01859	-4.65134	3.29777e-06	0.000208483
Mmp16	49.5712	-4.73936	1.04278	-4.54494	5.49501e-06	0.000322235
Rbp4	774.288	-4.74258	1.08347	-4.3772	1.20212e-05	0.000589144
Wdr63	21.3609	-4.75896	1.13585	-4.18979	2.79217e-05	0.00115252
Defb14	273.52	-4.76765	0.925844	-5.14952	2.61157e-07	2.30116e-05
AC168977.1	38.3498	-4.81329	1.16181	-4.14292	3.42918e-05	0.00136894
Shox2	28.3079	-4.91473	1.08719	-4.52056	6.16765e-06	0.000353155
Dsg1a	92.603	-4.92121	0.772361	-6.37165	1.8701e-10	3.53367e-08
Tmprss11d	124.661	-4.92682	0.787392	-6.25714	3.92104e-10	6.94596e-08
Dlx2	46.3559	-4.95829	1.13887	-4.3537	1.33858e-05	0.000641236
Msx1	848.935	-4.97228	0.563873	-8.81808	1.1644e-18	7.33397e-16
Tnfaip6	918.883	-4.99934	0.806637	-6.19776	5.72735e-10	9.83831e-08
Teddm3	31.7785	-5.01202	1.32749	-3.77556	0.00015965	0.00483958
Pde11a	43.1149	-5.06076	1.01915	-4.96567	6.84631e-07	5.44058e-05
Gm3776	23.8959	-5.06839	1.17381	-4.31792	1.57508e-05	0.000729859
Col3a1	11919.3	-5.07933	0.682711	-7.43994	1.00733e-13	3.17234e-11
Gm15433	77.1597	-5.13288	1.10657	-4.63855	3.50861e-06	0.000220356
Krt13	326.193	-5.22802	1.61945	-3.22827	0.00124543	0.0246276
Krtdap	2603.99	-5.27896	1.10484	-4.77805	1.77007e-06	0.000120959
Ccl8	161.057	-5.35737	0.747147	-7.17043	7.47629e-13	2.15495e-10
Sprr2h	74.4606	-5.38328	1.10591	-4.86774	1.12879e-06	8.49392e-05
Ccdc3	142.582	-5.41414	0.876813	-6.1748	6.62488e-10	1.12663e-07
Islr	655.365	-5.54527	0.661368	-8.38455	5.09223e-17	2.7062e-14
Gap43	44.7181	-5.5472	1.22826	-4.51629	6.29321e-06	0.000359135
a	19.875	-5.63754	1.23332	-4.57103	4.85337e-06	0.000287583
Lum	2131.78	-5.69421	0.768304	-7.4114	1.24974e-13	3.8642e-11
Sprr2g	23.8863	-5.88893	1.2134	-4.85323	1.21465e-06	8.90361e-05
Tmprss11g	65.2892	-5.9573	1.22533	-4.8618	1.16324e-06	8.71454e-05
Fbp2	1221.74	-5.97865	0.734266	-8.14235	3.87682e-16	1.73498e-13
Calm5	6.77108	-6.11073	1.78178	-3.42956	0.000604565	0.0142725
Mmp3	4958.43	-6.18888	1.12383	-5.50693	3.65137e-08	4.20906e-06
Krt6b	83.0086	-6.26058	0.896272	-6.98514	2.84567e-12	7.56147e-10
Defb6	12.6048	-6.27095	1.51753	-4.13234	3.59089e-05	0.00141358
2310046K23Rik	9.07793	-6.5231	1.49487	-4.36366	1.27903e-05	0.000616183
Dlx1	97.2584	-6.55612	1.55462	-4.21718	2.47377e-05	0.00104714
Amtn	398.607	-6.63432	1.31215	-5.05605	4.28021e-07	3.60343e-05
Gsta1	47.0697	-6.64777	1.27647	-5.20793	1.90956e-07	1.77454e-05
Pitx1	834.959	-6.86718	1.44729	-4.74485	2.08659e-06	0.000141938
Cd79b	39.4851	-7.17722	1.45488	-4.93322	8.08869e-07	6.339e-05
Ppbp	51.1499	-8.29563	1.45219	-5.71249	1.11336e-08	1.49085e-06
Defb8	56.5252	-8.46464	2.63426	-3.21329	0.00131222	0.025562
Inmt	40.5354	-8.68271	1.99989	-4.3416	1.41448e-05	0.000671916
Epyc	78.1465	-9.6298	1.36644	-7.04735	1.82352e-12	4.92235e-10
Kera	123.615	-10.2913	1.84292	-5.58422	2.34747e-08	2.97919e-06
Tnmd	199.901	-10.9847	1.75387	-6.26311	3.77372e-10	6.82722e-08
