# Supplementary material for: Aneuploidy drives the acquisition of cancer-specific driver genes
Source: Research Square preprint supplement (doi:10.21203/rs.3.rs-4941895/v1), 2024-09-04
Supplement: Supplementary file 3 [file 9394e9e42c44cdda9226d4fd.xlsx]

## Sheet: Sheet1
	DB.Class.Key	Symbol.x	Symbol.y
1	44847138	Gdnf	GDNF
2	44847139	Hoxa4	HOXA4
3	44847140	Cry1	CRY1
4	44847141	Alcam	ALCAM
5	44847142	Daxx	DAXX
6	44847143	Arx	ARX
7	44847144	Cpeb1	CPEB1
8	44847145	Or5k1b	OR5K2
9	44847145	Or5k1b	OR5K1
10	44847146	Or4a72	OR4A16
11	44847147	Or5k1	OR5K1
12	44847147	Or5k1	OR5K2
13	44847148	Or4a68	OR4A16
14	44847149	Or10j3b	OR10J3
15	44847150	Or12d17	OR12D3
16	44847151	Or5k17	OR5K4
17	44847152	Or12d15	OR12D2
18	44847152	Or12d15	OR12D1
19	44847153	Or4e2	OR4E2
20	44847154	Or12d14-ps1	OR12D2
21	44847154	Or12d14-ps1	OR12D1
22	44847155	Or10k2	OR10K2
23	44847156	Or12d16-ps1	OR12D1
24	44847156	Or12d16-ps1	OR12D2
25	44847157	Or4e5	OR4E1
26	44847158	Or4e1	OR4E1
27	44847159	Neurog1	NEUROG1
28	44847160	Msx2	MSX2
29	44847161	Pax6	PAX6
30	44847162	Ddx3x	DDX3X
31	44847163	D1Pas1	DDX3X
32	44847164	Ddx3y	DDX3Y
33	44847165	Adar	ADAR
34	44847166	Or4b1	OR4B1
35	44847167	Or2a12	OR2A12
36	44847168	Pklr	PKLR
37	44847169	Gng3	GNG3
38	44847170	Bcl2l1	BCL2L1
39	44847171	Atp1a1	ATP1A1
40	44847172	Cldn11	CLDN11
41	44847173	Gch1	GCH1
42	44847174	mt-Nd4l	ND4L
43	44847175	Cacna1c	CACNA1C
44	44847176	Fthl17f	FTHL17
45	44847176	Fthl17f	FTH1P19
46	44847177	Fthl17d	FTH1P19
47	44847177	Fthl17d	FTHL17
48	44847178	Ftmt	FTMT
49	44847179	Fthl17e	FTH1P19
50	44847179	Fthl17e	FTHL17
51	44847180	Fth1	FTH1
52	44847181	Fthl17a	FTHL17
53	44847181	Fthl17a	FTH1P19
54	44847182	Fthl17b	FTHL17
55	44847182	Fthl17b	FTH1P19
56	44847183	Fthl17c	FTH1P19
57	44847183	Fthl17c	FTHL17
58	44847185	Ran	RAN
59	44847187	Ucp2	UCP2
60	44847188	Rho	RHO
61	44847189	Adgra2	ADGRA2
62	44847190	Myog	MYOG
63	44847191	Or4c113	OR4C15
64	44847192	Or2at4	OR2AT4
65	44847193	Or4c122	OR4C15
66	44847194	Or4c112	OR4C15
67	44847195	Or4c114	OR4C15
68	44847196	Or4c109	OR4C15
69	44847197	Or4c118	OR4C15
70	44847198	Or4d1	OR4D1
71	44847199	Or4c110	OR4C15
72	44847200	Or4a76	OR4A16
73	44847201	Hesx1	HESX1
74	44847202	Appl1	APPL1
75	44847203	Nkx2-6	NKX2-6
76	44847204	Opn1sw	OPN1SW
77	44847205	Men1	MEN1
78	44847206	Or7c70	OR7C1
79	44847206	Or7c70	OR7C2
80	44847207	Mef2d	MEF2D
81	44847208	Hoxd12	HOXD12
82	44847209	Tcp1	TCP1
83	44847210	Foxn4	FOXN4
84	44847211	Six3	SIX3
85	44847212	Des	DES
86	44847213	Isl2	ISL2
87	44847214	Ctbp2	CTBP2
88	44847215	Frat2	FRAT2
89	44847216	Peg12	FRAT1
90	44847217	Frat1	FRAT1
91	44847218	Hoxb5	HOXB5
92	44847219	Gdf6	GDF6
93	44847220	Notch3	NOTCH3
94	44847221	Pax3	PAX3
95	44847222	Epb41l4a	EPB41L4A
96	44847223	Bax	BAX
97	44847224	Hoxd4	HOXD4
98	44847225	Pbrm1	PBRM1
99	44847226	Nr5a2	NR5A2
100	44847227	Twsg1	TWSG1
101	44847228	Ache	ACHE
102	44847229	Zp1	ZP1
103	44847230	Klf17	KLF17
104	44847231	Gucy2e	GUCY2D
105	44847232	mt-Nd3	ND3
106	44847233	Sox10	SOX10
107	44847234	Meis1	MEIS1
108	44847235	Tle3	TLE3
109	44847236	L1cam	L1CAM
110	44847237	Bmp4	BMP4
111	44847238	Tpst1	TPST1
112	44847239	Ctbp1	CTBP1
113	44847240	Stat3	STAT3
114	44847241	T	TBXT
115	44847242	Bmal1	BMAL1
116	44847243	Robo1	ROBO1
117	44847244	Cdh2	CDH2
118	44847245	Foxa1	FOXA1
119	44847246	Ppard	PPARD
120	44847247	Lhx3	LHX3
121	44847248	Sox9	SOX9
122	44847249	Sox15	SOX15
123	44847250	Gart	GART
124	44847251	Hoxc9	HOXC9
125	44847252	Cd74	CD74
126	44847253	Elavl1	ELAVL1
127	44847254	Bmp2	BMP2
128	44847255	Foxb1	FOXB1
129	44847256	Etv4	ETV4
130	44847257	Frzb	FRZB
131	44847258	Mef2c	MEF2C
132	44847259	Pitpnm3	PITPNM3
133	44847260	Zic1	ZIC1
134	44847261	Hoxa2	HOXA2
135	44847262	Nme6	NME6
136	44847263	Casp8	CASP8
137	44847264	Egr2	EGR2
138	44847265	Myo7a	MYO7A
139	44847266	Apaf1	APAF1
140	44847267	Lrrk2	LRRK2
141	44847268	Otx2	OTX2
142	44847269	Etv6	ETV6
143	44847270	Jag2	JAG2
144	44847271	Ikzf1	IKZF1
145	44847272	Cebpd	CEBPD
146	44847273	Gria2	GRIA2
147	44847274	Slit2	SLIT2
148	44847275	Mkrn2	MKRN2
149	44847276	Spns1	SPNS1
150	44847277	Tnnt2	TNNT2
151	44847278	Phc2	PHC2
152	44847279	Krt8	KRT8
153	44847280	Krt77	KRT77
154	44847281	Gm5414	KRT6A
155	44847281	Gm5414	KRT6B
156	44847281	Gm5414	KRT6C
157	44847282	Krt74	KRT74
158	44847283	Gm5478	KRT6B
159	44847283	Gm5478	KRT6C
160	44847283	Gm5478	KRT6A
161	44847284	Krt90	KRT90P
162	44847285	Krt79	KRT79
163	44847286	Krt1	KRT1
164	44847287	Krt4	KRT4
165	44847288	Krt75	KRT75
166	44847289	Krt73	KRT73
167	44847290	Krt7	KRT7
168	44847291	Krt6b	KRT6B
169	44847291	Krt6b	KRT6C
170	44847291	Krt6b	KRT6A
171	44847292	Krt76	KRT76
172	44847293	Krt6a	KRT6A
173	44847293	Krt6a	KRT6C
174	44847293	Krt6a	KRT6B
175	44847294	Krt72	KRT72
176	44847295	Krt2	KRT2
177	44847296	Krt71	KRT71
178	44847297	Rbp2	RBP2
179	44847298	Il17rd	IL17RD
180	44847299	Glra3	GLRA3
181	44847300	Glra4	GLRA4
182	44847301	Sec61a1	SEC61A1
183	44847302	Lmnb1	LMNB1
184	44847303	Lmna	LMNA
185	44847304	Naca	NACA
186	44847305	Srrt	SRRT
187	44847306	Atp6v1e1	ATP6V1E1
188	44847307	Atp6v1e2	ATP6V1E2
189	44847308	Cct2	CCT2
190	44847309	Cct3	CCT3
191	44847310	Cct7	CCT7
192	44847311	Ddx19b	DDX19B
193	44847312	Ddx19a	DDX19A
194	44847313	Hdac1	HDAC1
195	44847314	Mcm3	MCM3
196	44847315	Rpl24	RPL24
197	44847316	Rps5	RPS5
198	44847317	Sf3b4	SF3B4
199	44847318	Stil	STIL
200	44847319	Aurkc	AURKC
201	44847320	Aurkb	AURKB
202	44847321	Terf2	TERF2
203	44847322	U2af1	U2AF1
204	44847323	Vps18	VPS18
205	44847324	Csnk1a1	CSNK1A1
206	44847325	Flot1	FLOT1
207	44847326	Insr	INSR
208	44847327	Ptk2b	PTK2B
209	44847328	Invs	INVS
210	44847329	Nek8	NEK8
211	44847330	Cygb	CYGB
212	44847331	Id3	ID3
213	44847332	Unc45b	UNC45B
214	44847333	Lyzl6	LYZL6
215	44847334	Spaca5	SPACA5
216	44847334	Spaca5	SPACA5B
217	44847335	Lyzl4	LYZL4
218	44847336	Spaca3	SPACA3
219	44847337	Lyz1	LYZ
220	44847338	Lyzl1	LYZL2
221	44847338	Lyzl1	LYZL1
222	44847339	Lyz2	LYZ
223	44847340	Lyz3	LYZ
224	44847341	Tbx18	TBX18
225	44847342	Tbx15	TBX15
226	44847343	Cp	CP
227	44847344	Wnt2	WNT2
228	44847345	App	APP
229	44847346	Gdf3	GDF3
230	44847347	Gdf1	GDF1
231	44847348	Psmb8	PSMB8
232	44847349	Ldb2	LDB2
233	44847350	Map2k6	MAP2K6
234	44847351	Eif4e1b	EIF4E1B
235	44847352	Tbx2	TBX2
236	44847353	Pbx4	PBX4
237	44847354	Gli2	GLI2
238	44847355	Mmp21	MMP21
239	44847356	Hhex	HHEX
240	44847357	Tradd	TRADD
241	44847358	Adh5	ADH5
242	44847359	Zbtb22	ZBTB22
243	44847360	Arnt2	ARNT2
244	44847361	Rax	RAX
245	44847362	Krt5	KRT5
246	44847363	Hoxb6	HOXB6
247	44847364	Tbx5	TBX5
248	44847365	Fli1	FLI1
249	44847366	Oprm1	OPRM1
250	44847367	Psmb9	PSMB9
251	44847368	Slc39a7	SLC39A7
252	44847369	Tnnc2	TNNC2
253	44847370	Pax2	PAX2
254	44847371	Pou3f2	POU3F2
255	44847372	Pax9	PAX9
256	44847373	Ncam1	NCAM1
257	44847374	Evx1	EVX1
258	44847375	Hoxa1	HOXA1
259	44847376	Ppt2	PPT2
260	44847377	Ugdh	UGDH
261	44847378	Klf3	KLF3
262	44847379	Hsf2	HSF2
263	44847380	Ckm	CKM
264	44847381	Klf1	KLF1
265	44847382	Fgf8	FGF8
266	44847383	Guca1b	GUCA1B
267	44847384	Cxcr4	CXCR4
268	44847385	Meis2	MEIS2
269	44847386	Vegfa	VEGFA
270	44847387	Elavl3	ELAVL3
271	44847388	Hoxc4	HOXC4
272	44847389	Hoxb2	HOXB2
273	44847390	Fabp2	FABP2
274	44847391	Pitx2	PITX2
275	44847392	Nup93	NUP93
276	44847393	Ephb3	EPHB3
277	44847394	H2-Ob	HLA-DOB
278	44847395	H2-Eb2	HLA-DRB3
279	44847395	H2-Eb2	HLA-DRB5
280	44847395	H2-Eb2	HLA-DRB4
281	44847395	H2-Eb2	HLA-DRB1
282	44847396	H2-Ab1	HLA-DQB1
283	44847396	H2-Ab1	HLA-DQB2
284	44847397	H2-Eb1	HLA-DRB3
285	44847397	H2-Eb1	HLA-DRB4
286	44847397	H2-Eb1	HLA-DRB5
287	44847397	H2-Eb1	HLA-DRB1
288	44847398	Foxa3	FOXA3
289	44847399	Spon2	SPON2
290	44847400	Foxc1	FOXC1
291	44847401	Nr1d2	NR1D2
292	44847402	Lhx5	LHX5
293	44847403	Mesp2	MESP2
294	44847404	Mesp1	MESP1
295	44847405	Dhh	DHH
296	44847406	Dlx5	DLX5
297	44847407	Wnt8b	WNT8B
298	44847408	Gsc	GSC
299	44847409	Hoxd10	HOXD10
300	44847410	Igf1	IGF1
301	44847411	Mylpf	MYL11
302	44847412	Tyro3	TYRO3
303	44847413	Neurod6	NEUROD6
304	44847414	Nos1	NOS1
305	44847415	Chrna1	CHRNA1
306	44847416	Shh	SHH
307	44847417	Hoxa13	HOXA13
308	44847418	Nme7	NME7
309	44847419	Mapk12	MAPK12
310	44847420	Snai1	SNAI1
311	44847421	Wnt4	WNT4
312	44847422	Pou3f3	POU3F3
313	44847423	En1	EN1
314	44847424	Acat2	ACAT2
315	44847425	Acat3	ACAT2
316	44847426	Opn1mw	OPN1MW3
317	44847426	Opn1mw	OPN1MW2
318	44847426	Opn1mw	OPN1MW
319	44847426	Opn1mw	OPN1LW
320	44847427	Gata1	GATA1
321	44847428	Apoa1	APOA1
322	44847429	Cxcl14	CXCL14
323	44847430	Cdk5	CDK5
324	44847431	Psmb5	PSMB5
325	44847432	Tnnt3	TNNT3
326	44847433	Dnmt1	DNMT1
327	44847434	Kit	KIT
328	44847435	Cfb	CFB
329	44847436	Inhbb	INHBB
330	44847437	Gdf5	GDF5
331	44847438	Cpsf4	CPSF4
332	44847439	Ccl27a	CCL27
333	44847440	Gm13306	CCL27
334	44847441	Ccl27b	CCL27
335	44847442	Nodal	NODAL
336	44847443	Tbx20	TBX20
337	44847444	Tek	TEK
338	44847445	Hes7	HES7
339	44847446	Hoxc8	HOXC8
340	44847447	Csnk2b	CSNK2B
341	44847448	Cyp19a1	CYP19A1
342	44847449	Rheb	RHEB
343	44847450	Rhebl1	RHEBL1
344	44847451	Cry2	CRY2
345	44847452	Fgf3	FGF3
346	44847453	Dlx1	DLX1
347	44847454	Fzd7	FZD7
348	44847455	Dhfr	DHFR2
349	44847455	Dhfr	DHFR
350	44847455	Dhfr	DHFRP1
351	44847456	Mmut	MMUT
352	44847457	Ucp1	UCP1
353	44847458	Notch2	NOTCH2
354	44847459	F7	F7
355	44847460	Sfrp5	SFRP5
356	44847461	mt-Nd4	ND4
357	44847462	mt-Cytb	CYTB
358	44847463	Atp1b2	ATP1B2
359	44847464	Psma6	PSMA6
360	44847465	Ccna2	CCNA2
361	44847466	Mtf1	MTF1
362	44847467	Atp6ap1	ATP6AP1
363	44847468	Rpl36a	RPL36A
364	44847470	Rpl36al	RPL36AL
365	44847470	Rpl36al	RPL36A
366	44847471	Scarb2	SCARB2
367	44847472	Ppp1r10	PPP1R10
368	44847473	Slc25a5	SLC25A5
369	44847474	Snrpc	SNRPC
370	44847475	Timm23	TIMM23B
371	44847475	Timm23	TIMM23
372	44847476	Uxs1	UXS1
373	44847477	Kif11	KIF11
374	44847478	Igf1r	IGF1R
375	44847479	Vangl2	VANGL2
376	44847480	Cryaa	CRYAA
377	44847481	Gbx2	GBX2
378	44847482	Gpi1	GPI
379	44847483	Mab21l2	MAB21L2
380	44847484	Mab21l1	MAB21L1
381	44847485	Ptgs1	PTGS1
382	44847486	Ahr	AHR
383	44847487	Odc1	ODC1
384	44847488	Egr1	EGR1
385	44847489	Dll3	DLL3
386	44847491	Dnmt3l	DNMT3L
387	44847492	Slit3	SLIT3
388	44847493	Sox3	SOX3
389	44847494	Hoxb1	HOXB1
390	44847495	Cldn7	CLDN7
391	44847496	Ski	SKI
392	44847497	Tbx4	TBX4
393	44847498	Dvl3	DVL3
394	44847499	Max	MAX
395	44847500	Pou3f1	POU3F1
396	44847501	Fabp7	FABP7
397	44847502	Actc1	ACTC1
398	44847503	Psen1	PSEN1
399	44847504	Duxbl1	DUXB
400	44847505	Alas2	ALAS2
401	44847506	Notch1	NOTCH1
402	44847507	Cd81	CD81
403	44847508	Col11a2	COL11A2
404	44847509	Smad4	SMAD4
405	44847510	Hoxd9	HOXD9
406	44847511	Sema3d	SEMA3D
407	44847512	Nme1	NME1
408	44847513	Nme2	NME1-NME2
409	44847513	Nme2	NME2P1
410	44847513	Nme2	NME2
411	44847514	Hoxc6	HOXC6
412	44847515	Glrb	GLRB
413	44847516	Smad1	SMAD1
414	44847517	Ngb	NGB
415	44847518	mt-Nd6	ND6
416	44847519	Pknox1	PKNOX1
417	44847520	Cat	CAT
418	44847521	Fech	FECH
419	44847522	Cse1l	CSE1L
420	44847523	Ret	RET
421	44847524	Rag1	RAG1
422	44847525	Sod1	SOD1
423	44847526	Ccne1	CCNE1
424	44847527	Fezf2	FEZF2
425	44847528	Hoxd1	HOXD1
426	44847529	Apoe	APOE
427	44847530	Hoxc11	HOXC11
428	44847531	Pcmt1	PCMT1
429	44847533	Or6c75	OR6C75
430	44847534	Or12d13	OR12D1
431	44847534	Or12d13	OR12D2
432	44847535	Or1r1	OR1R1P
433	44847536	Or6c65	OR6C65
434	44847539	Or12d12	OR12D1
435	44847539	Or12d12	OR12D2
436	44847541	Or6c2	OR6C2
437	44847542	Or1j19	OR1J2
438	44847544	Or6c74	OR6C74
439	44847545	Or6c8b	OR2AP1
440	44847546	Or6n2	OR6N2
441	44847547	Or13a1	OR13A1
442	44847548	Or6c209	OR6C68
443	44847550	Or6c35	OR6C68
444	44847553	Or6c1	OR6C1
445	44847555	Or6c70	OR6C70
446	44847558	Or6c66	OR6C76
447	44847559	Or6c76	OR6C76
448	44847561	Or6c6	OR6C6
449	44847562	Or4a80	OR4A5
450	44847562	Or4a80	OR4A8
451	44847562	Or4a80	OR4A16
452	44847569	Or6c1b	OR6C1
453	44847570	Or1j1	OR1J1
454	44847571	Or6c2b	OR6C2
455	44847572	Or12d2	OR12D1
456	44847572	Or12d2	OR12D2
457	44847574	Or6c68	OR6C68
458	44847576	Or6c76b	OR6C76
459	44847577	Or6c217	OR6C70
460	44847579	Or1l8	OR1L8
461	44847581	Or6c69b	OR6C70
462	44847584	Or6c66b	OR6C76
463	44847586	Or6c69c	OR6C65
464	44847587	Or6c8	OR2AP1
465	44847592	Or6c6c	OR6C6
466	44847593	Or6c3b	OR6C3
467	44847594	Or6c3	OR6C3
468	44847595	Ptch2	PTCH2
469	44847596	Dbh	DBH
470	44847597	Hba-a2	HBA1
471	44847597	Hba-a2	HBA2
472	44847598	Hba-x	HBZ
473	44847599	Fzd8	FZD8
474	44847600	Smn1	SMN1
475	44847600	Smn1	SMN2
476	44847601	Rpa2	RPA2
477	44847602	Wnt8a	WNT8A
478	44847603	Ins1	INS
479	44847604	Ins2	INS
480	44847605	Mtnr1b	MTNR1B
481	44847606	Pcx	PC
482	44847607	Cdx4	CDX4
483	44847608	Slc34a2	SLC34A2
484	44847609	Nme3	NME3
485	44847610	Pyy	PYY3
486	44847610	Pyy	PYY
487	44847611	Oprd1	OPRD1
488	44847612	Ncam2	NCAM2
489	44847613	Myl1	MYL1
490	44847614	Tnc	TNC
491	44847615	Wnt10a	WNT10A
492	44847616	Copg2	COPG2
493	44847617	Cdc25b	CDC25B
494	44847618	Cdc25c	CDC25C
495	44847619	Cdc25a	CDC25A
496	44847620	Nkx2-1	NKX2-1
497	44847621	Dmd	DMD
498	44847622	Pbx2	PBX2
499	44847623	Hoxa10	HOXA10
500	44847624	Zfp703	ZNF703
501	44847626	Xbp1	XBP1
502	44847627	Myod1	MYOD1
503	44847628	Jak1	JAK1
504	44847629	Spon1	SPON1
505	44847630	Dlx4	DLX4
506	44847631	Rgl2	RGL2
507	44847632	Or4b1b	OR4B1
508	44847633	Or1e1c	OR1E2
509	44847633	Or1e1c	OR1E3
510	44847635	Or1e32	OR1E1
511	44847635	Or1e32	OR1E3
512	44847635	Or1e32	OR1E2
513	44847636	Or7a37	OR7A5
514	44847636	Or7a37	OR7A10
515	44847637	Or1e21	OR1E3
516	44847637	Or1e21	OR1E1
517	44847637	Or1e21	OR1E2
518	44847638	Or1n1	OR1N1
519	44847639	Or7g33	OR7G2
520	44847640	Or7a36	OR7A5
521	44847640	Or7a36	OR7C1
522	44847640	Or7a36	OR7A10
523	44847641	Or1e16	OR1E2
524	44847641	Or1e16	OR1E3
525	44847642	Or1n1b	OR1N1
526	44847643	Or2a25	OR2A25
527	44847644	Or4s2b	OR4S2
528	44847646	Or1s2	OR1S1
529	44847646	Or1s2	OR1S2
530	44847648	Or1e19	OR1E3
531	44847648	Or1e19	OR1E2
532	44847649	Or1e29	OR1E1
533	44847649	Or1e29	OR1E2
534	44847649	Or1e29	OR1E3
535	44847651	Or1e34	OR1E2
536	44847651	Or1e34	OR1E3
537	44847651	Or1e34	OR1E1
538	44847652	Or1n2	OR1N2
539	44847653	Or1e22	OR1E2
540	44847653	Or1e22	OR1E3
541	44847653	Or1e22	OR1E1
542	44847654	Or1e1	OR1E1
543	44847654	Or1e1	OR1E2
544	44847654	Or1e1	OR1E3
545	44847656	Or4s2	OR4S2
546	44847657	Or1e26	OR1E1
547	44847657	Or1e26	OR1E3
548	44847657	Or1e26	OR1E2
549	44847658	Or1e35	OR1E2
550	44847658	Or1e35	OR1E3
551	44847658	Or1e35	OR1E1
552	44847659	Or1e33	OR1E3
553	44847659	Or1e33	OR1E1
554	44847659	Or1e33	OR1E2
555	44847660	Or4k15c	OR4K15
556	44847661	Or1e30	OR1E3
557	44847661	Or1e30	OR1E1
558	44847661	Or1e30	OR1E2
559	44847662	Or1m1	OR1M1
560	44847663	Or1e31	OR1E3
561	44847663	Or1e31	OR1E1
562	44847663	Or1e31	OR1E2
563	44847664	Or10b1	OR10R2
564	44847664	Or10b1	OR10T2
565	44847666	Or2a57	OR2A1
566	44847666	Or2a57	OR2A42
567	44847667	Or1q1	OR1Q1
568	44847668	Or7g12	OR7G3
569	44847670	Or1l4	OR1L4
570	44847670	Or1l4	OR1L6
571	44847671	Or2a20	OR2A42
572	44847671	Or2a20	OR2A1
573	44847673	Or7g19	OR7G3
574	44847674	Or4k15	OR4K15
575	44847675	Or1e23	OR1E2
576	44847675	Or1e23	OR1E3
577	44847675	Or1e23	OR1E1
578	44847676	Or7a41	OR7A17
579	44847676	Or7a41	OR7A5
580	44847676	Or7a41	OR7A2P
581	44847677	Or1f12	OR1F12P
582	44847679	Or1e25	OR1E2
583	44847679	Or1e25	OR1E3
584	44847679	Or1e25	OR1E1
585	44847680	Or1l4b	OR1L4
586	44847682	Or1i2	OR1I1
587	44847683	Or2a51	OR2A1
588	44847683	Or2a51	OR2A42
589	44847685	Or2a7	OR2A4
590	44847685	Or2a7	OR2A7
591	44847687	Or4b1d	OR4B1
592	44847688	Or1j4	OR1J4
593	44847689	Or4k15b	OR4K15
594	44847691	Or7g27	OR7G2
595	44847691	Or7g27	OR7G1
596	44847692	Or1e17	OR1E2
597	44847692	Or1e17	OR1E1
598	44847692	Or1e17	OR1E3
599	44847693	Cdh11	CDH11
600	44847694	Pla2g4a	PLA2G4A
601	44847695	Scn8a	SCN8A
602	44847696	En2	EN2
603	44847697	Pes1	PES1
604	44847698	Hoxb8	HOXB8
605	44847699	Urod	UROD
606	44847700	Axin1	AXIN1
607	44847701	Gfap	GFAP
608	44847702	Tal1	TAL1
609	44847703	Nr4a2	NR4A2
610	44847704	Dnajc3	DNAJC3
611	44847705	Anxa13	ANXA13
612	44847706	Nfya	NFYA
613	44847707	Pou5f1	POU5F1
614	44847707	Pou5f1	POU5F1B
615	44847708	Pou5f2	POU5F2
616	44847709	Sox11	SOX11
617	44847710	Aanat	AANAT
618	44847711	Efnb2	EFNB2
619	44847712	Meis3	MEIS3
620	44847712	Meis3	MEIS3P1
621	44847712	Meis3	MEIS3P2
622	44847713	Tfe3	TFE3
623	44847714	Smo	SMO
624	44847715	Klf2	KLF2
625	44847716	Cebpb	CEBPB
626	44847717	Ube4b	UBE4B
627	44847718	Lhx1	LHX1
628	44847719	Serpinh1	SERPINH1
629	44847720	Hsp90ab1	HSP90AB1
630	44847720	Hsp90ab1	HSP90AB4P
631	44847720	Hsp90ab1	HSP90AB2P
632	44847720	Hsp90ab1	HSP90AB3P
633	44847721	Srf	SRF
634	44847722	Rxrb	RXRB
635	44847723	Ednrb	EDNRB
636	44847724	Stx1b	STX1B
637	44847725	Tef	TEF
638	44847726	Myb	MYB
639	44847727	Wnt1	WNT1
640	44847728	Hoxb9	HOXB9
641	44847729	Inhba	INHBA
642	44847730	Lima1	LIMA1
643	44847731	Otx1	OTX1
644	44847737	Ctsl	CTSV
645	44847737	Ctsl	CTSL
646	44847744	Copz2	COPZ2
647	44847745	Gdf7	GDF7
648	44847746	Neurod2	NEUROD2
649	44847747	Wif1	WIF1
650	44847748	Prph2	PRPH2
651	44847749	Tpm3	TPM3
652	44847750	Tpm1	TPM1
653	44847751	Efnb1	EFNB1
654	44847752	Angpt1	ANGPT1
655	44847753	Prkci	PRKCI
656	44847754	mt-Co2	MTCO2P12
657	44847754	mt-Co2	COX2
658	44847755	Cyp1a2	CYP1A2
659	44847756	Cyp1a1	CYP1A1
660	44847757	S1pr2	S1PR2
661	44847758	Adarb1	ADARB1
662	44847759	Six4	SIX4
663	44847760	Cripto	CRIPTO3
664	44847760	Cripto	CRIPTO
665	44847761	Nrf1	NRF1
666	44847762	Mcl1	MCL1
667	44847763	Robo3	ROBO3
668	44847764	Ldhb	LDHB
669	44847765	Cdh3	CDH3
670	44847766	Cdh1	CDH1
671	44847767	Hoxb4	HOXB4
672	44847768	Myl7	MYL7
673	44847769	Rorc	RORC
674	44847770	Ihh	IHH
675	44847771	Dlx6	DLX6
676	44847772	Eomes	EOMES
677	44847773	Ptpn1	PTPN1
678	44847774	Sptb	SPTB
679	44847775	Myf5	MYF5
680	44847776	Hspa8	HSPA8
681	44847777	Hes5	HES5
682	44847778	Or5p76	OR5P2
683	44847779	Or8k20	OR8K5
684	44847780	Or9i14	OR9I1
685	44847781	Or8b12c	OR8B12
686	44847782	Or8k18	OR8K5
687	44847783	Or5p58	OR5P2
688	44847785	Or5b95	OR5B3
689	44847786	Or5b99	OR5B2
690	44847788	Or8g21	OR8G5
691	44847789	Or4c115	OR4C15
692	44847790	Or8g22	OR8G5
693	44847794	Or5p80	OR5P3
694	44847795	Or8w1	OR5W2
695	44847796	Or8g17	OR8G5
696	44847797	Or5b106	OR5B3
697	44847799	Or8g19	OR8G1
698	44847801	Or8b12b	OR8B12
699	44847805	Or8g4	OR8G1
700	44847806	Or8g20	OR8G1
701	44847807	Or4c126	OR4C45
702	44847809	Or8g2	OR8G3P
703	44847809	Or8g2	OR8G2P
704	44847811	Or5au1	OR5AU1
705	44847812	Or8g32	OR8G1
706	44847816	Or8d23	OR8D1
707	44847817	Or8g18	OR8G1
708	44847819	Or8b8	OR8B8
709	44847820	Or8d1	OR8D1
710	44847822	Or8d1b	OR8D1
711	44847824	Or9q1	OR9Q1
712	44847826	Or7g20	OR7G2
713	44847828	Or5ak25	OR5AK2
714	44847828	Or5ak25	OR5AK3P
715	44847829	Or8g30	OR8G1
716	44847833	Or8g23	OR8G1
717	44847834	Or8g34	OR8G1
718	44847835	Or2a54	OR2A14
719	44847836	Bag6	BAG6
720	44847837	Edn1	EDN1
721	44847838	mt-Atp6	ATP6
722	44847839	Atp6-ps	ATP6
723	44847840	Fads2	FADS2
724	44847841	Fads3	FADS3
725	44847842	Igf2	IGF2
726	44847843	Tnn	TNN
727	44847844	Atp1b1	ATP1B1
728	44847845	Foxo3	FOXO3
729	44847845	Foxo3	FOXO3B
730	44847846	Rbp4	RBP4
731	44847847	Pth2r	PTH2R
732	44847848	Runx3	RUNX3
733	44847849	Mapk14	MAPK14
734	44847850	Mtch2	MTCH2
735	44847851	Gcg	GCG
736	44847852	Ddx4	DDX4
737	44847853	Btg2	BTG2
738	44847854	Hoxd11	HOXD11
739	44847855	Chrd	CHRD
740	44847856	Psme1	PSME1
741	44847857	Tenm3	TENM3
742	44847858	Rplp0	RPLP0P6
743	44847858	Rplp0	RPLP0
744	44847859	Npy	NPY
745	44847860	Gsk3b	GSK3B
746	44847861	Hoxa9	HOXA9
747	44847862	Npy4r	NPY4R2
748	44847862	Npy4r	NPY4R
749	44847863	Dazl	DAZ2
750	44847863	Dazl	DAZ3
751	44847863	Dazl	DAZL
752	44847863	Dazl	DAZ1
753	44847863	Dazl	DAZ4
754	44847864	Htt	HTT
755	44847865	Bmal2	BMAL2
756	44847866	Fgfr3	FGFR3
757	44847867	Trpc4ap	TRPC4AP
758	44847868	Pcna	PCNA
759	44847869	Neurod1	NEUROD1
760	44847870	Bmpr1a	BMPR1A
761	44847871	Pth1r	PTH1R
762	44847872	Wt1	WT1
763	44847873	Angptl3	ANGPTL3
764	44847874	Gnat2	GNAT2
765	44847875	mt-Nd1	ND1
766	44847876	Cebpg	CEBPG
767	44847877	Mafb	MAFB
768	44847878	Bmpr1b	BMPR1B
769	44847879	Hbb-y	HBG2
770	44847879	Hbb-y	HBE1
771	44847880	Hbb-bh2	HBB
772	44847880	Hbb-bh2	HBD
773	44847881	Melk	MELK
774	44847882	Atoh7	ATOH7
775	44847883	Etv5	ETV5
776	44847884	H2-T22	HLA-B
777	44847884	H2-T22	HLA-F
778	44847884	H2-T22	HLA-G
779	44847884	H2-T22	HLA-E
780	44847884	H2-T22	HLA-C
781	44847885	Mr1	MR1
782	44847886	H2-T10	HLA-C
783	44847886	H2-T10	HLA-E
784	44847886	H2-T10	HLA-B
785	44847887	Slc3a2	SLC3A2
786	44847888	Ndrg3	NDRG3
787	44847889	Tle5	TLE5
788	44847890	Ctnnb1	CTNNB1
789	44847891	Jak2	JAK2
790	44847892	Foxd3	FOXD3
791	44847893	Fst	FST
792	44847894	Emx2	EMX2
793	44847895	Msx1	MSX1
794	44847896	Actn3	ACTN3
795	44847897	Lpl	LPL
796	44847898	Celf3	CELF3
797	44847899	Lefty1	LEFTY1
798	44847900	Lefty2	LEFTY2
799	44847901	Hsp90aa1	HSP90AA1
800	44847902	Tmod4	TMOD4
801	44847903	P2rx3	P2RX3
802	44847904	Ldha	LDHA
803	44847905	Myh6	MYH6
804	44847906	Myh7	MYH7
805	44847907	Gjb1	GJB1
806	44847908	Cldn4	CLDN4
807	44847909	Cldn13	CLDN4
808	44847910	Gnat1	GNAT1
809	44847911	mt-Nd5	ND5
810	44847912	Pdp2	PDP2
811	44847913	Erh	ERH
812	44847914	Erhrt-ps	ERH
813	44847915	Fzd5	FZD5
814	44847916	Or52n2b	OR52N2
815	44847917	Or52e2	OR52E2
816	44847920	Or51e1	OR51E1
817	44847924	Or51i2	OR51I2
818	44847926	Or52r1c	OR52R1
819	44847927	Or52k2	OR52K2
820	44847927	Or52k2	OR52K1
821	44847928	Or52r1b	OR52R1
822	44847929	Or52e5	OR52E5
823	44847931	Or52d1	OR52D1
824	44847932	Or51h1	OR51H1
825	44847935	Or52z13	OR52B6
826	44847936	Or52b4	OR52B4
827	44847938	Or51v14	OR51V1
828	44847939	Or52n4b	OR52N4
829	44847942	Or52n2c	OR52N2
830	44847944	Or51b6b	OR51B6
831	44847946	Or52h1	OR52H1
832	44847947	Or52n2	OR52N2
833	44847949	Or52n5	OR52N5
834	44847949	Or52n5	OR52N1
835	44847953	Or52r1	OR52R1
836	44847957	Or52p1	OR52P1
837	44847958	Or51k1	OR51J1
838	44847962	Or51f1d	OR51F1
839	44847965	Or51f2	OR51F2
840	44847966	Or51i1	OR51I1
841	44847971	Or52n1	OR52N1
842	44847974	Or51f1e	OR51F1
843	44847976	Or52i2	OR52I2
844	44847976	Or52i2	OR52I1
845	44847978	Or52b2	OR52B2
846	44847979	Or52j3	OR52J3
847	44847981	Or52n4	OR52N4
848	44847982	Or51a7	OR51A7
849	44847983	Or51k7	OR51J1
850	44847985	Or51f1	OR51F1
851	44847988	Or52e4	OR52E4
852	44847989	Or52e8	OR52E6
853	44847989	Or52e8	OR52E8
854	44847990	Or51e2	OR51E2
855	44847991	Or52l1	OR52L1
856	44847991	Or52l1	OR52L2P
857	44847992	Or52e8b	OR52E8
858	44847992	Or52e8b	OR52E6
859	44847994	Or52z1	OR52Z1P
860	44847997	Or51d1	OR51D1
861	44847998	Or51b4	OR51B4
862	44848000	Or52b4i	OR52B4
863	44848002	Or52m1	OR52M1
864	44848005	Or52e3	OR52E2
865	44848006	Or52a5	OR52A5
866	44848006	Or52a5	OR52A1
867	44848011	Or51k2	OR51J1
868	44848012	Sox21	SOX21
869	44848013	Nog	NOG
870	44848014	Gata2	GATA2
871	44848015	Mest	MEST
872	44848016	Gap43	GAP43
873	44848017	Runx1	RUNX1
874	44848018	Lmo2	LMO2
875	44848019	Hoxa3	HOXA3
876	44848020	Igf2bp3	IGF2BP3
877	44848021	Mxi1	MXI1
878	44848022	Vsx1	VSX1
879	44848023	Snap25	SNAP25
880	44848024	Epha4	EPHA4
881	44848025	Krt12	KRT12
882	44848026	Krt31	KRT31
883	44848027	Krt10	KRT10
884	44848028	Krt14	KRT14
885	44848029	Krt33b	KRT34
886	44848029	Krt33b	KRT33B
887	44848029	Krt33b	KRT31
888	44848030	Krt19	KRT19
889	44848031	Krt16	KRT16
890	44848032	Krt17	KRT17
891	44848033	Krt34	KRT34
892	44848035	Krt24	KRT24
893	44848036	Krt13	KRT13
894	44848037	Krt15	KRT15
895	44848038	Cdh4	CDH4
896	44848039	Acvr1	ACVR1
897	44848040	Psme2	PSME2
898	44848041	Psme2b	PSME2
899	44848042	Ldb1	LDB1
900	44848043	Vps52	VPS52
901	44848044	Gja8	GJA8
902	44848045	Cnmd	CNMD
903	44848046	Angpt2	ANGPT2
904	44848047	Csf1r	CSF1R
905	44848048	Cldn3	CLDN3
906	44848049	Guca1a	GUCA1A
907	44848050	Vim	VIM
908	44848051	Irx3	IRX3
909	44848052	Ina	INA
910	44848058	Or10j3	OR10J3
911	44848060	Or13g1	OR13G1
912	44848063	Or6k2	OR6K2
913	44848064	Acvr1b	ACVR1B
914	44848065	Jup	JUP
915	44848066	Wnt11	WNT11
916	44848067	Dcn	DCN
917	44848068	Dbx2	DBX2
918	44848069	Tcf15	TCF15
919	44848070	Mef2a	MEF2A
920	44848072	Ephb4	EPHB4
921	44848073	Ebf2	EBF2
922	44848074	Psen2	PSEN2
923	44848075	Tie1	TIE1
924	44848076	Ctsd	CTSD
925	44848077	Dbx1	DBX1
926	44848078	Dapl1	DAPL1
927	44848079	Hey2	HEY2
928	44848080	Gpr85	GPR85
929	44848081	Htatip2	HTATIP2
930	44848082	Lfng	LFNG
931	44848083	Irx5	IRX5
932	44848084	Neurog3	NEUROG3
933	44848085	Gpc4	GPC4
934	44848086	Gjc1	GJC1
935	44848087	Ptk2	PTK2
936	44848088	Mkrn1	MKRN1
937	44848089	Mkrn3	MKRN3
938	44848090	Fabp3	FABP3
939	44848091	Tpi1	TPI1
940	44848092	Eef1g	EEF1G
941	44848093	B3gat3	B3GAT3
942	44848094	Actl6a	ACTL6A
943	44848095	Dtl	DTL
944	44848096	Mak16	MAK16
945	44848097	Mcm2	MCM2
946	44848098	Mcm7	MCM7
947	44848099	Ncbp2	NCBP2L
948	44848099	Ncbp2	NCBP2
949	44848100	Pole2	POLE2
950	44848101	Rpl35	RPL35
951	44848102	Rpl35rt	RPL35
952	44848105	Rps18	RPS18
953	44848106	Smc4	SMC4
954	44848107	Snrpd1	SNRPD1
955	44848108	Taf7	TAF7
956	44848109	Flot2	FLOT2
957	44848110	Nr2f1	NR2F1
958	44848111	Ros1	ROS1
959	44848112	Ptgs2	PTGS2
960	44848113	Bivm	BIVM
961	44848114	Tcf3	TCF3
962	44848115	Flt4	FLT4
963	44848116	Dach2	DACH2
964	44848117	Cldn9	CLDN9
965	44848118	Cldn6	CLDN6
966	44848119	Gucy2f	GUCY2F
967	44848120	Fgf4	FGF4
968	44848121	Kif23	KIF23
969	44848122	C3	C3
970	44848123	Myh4	MYH4
971	44848124	Myh13	MYH13
972	44848125	Myh1	MYH1
973	44848126	Myh8	MYH8
974	44848127	Myh2	MYH2
975	44848128	Myh3	MYH3
976	44848129	Ptch1	PTCH1
977	44848130	Epha2	EPHA2
978	44848131	Epha1	EPHA1
979	44848132	Clock	CLOCK
980	44848133	Dll1	DLL1
981	44848134	Casp4	CASP5
982	44848134	Casp4	CASP4
983	44848135	Casp1	CASP1
984	44848136	Casp12	CASP12
985	44848137	Dct	DCT
986	44848138	Brd2	BRD2
987	44848139	Hoxc10	HOXC10
988	44848140	Ube2i	UBE2I
989	44848141	Tcf7l1	TCF7L1
990	44848142	Thrb	THRB
991	44848143	Mstn	MSTN
992	44848144	Celf1	CELF1
993	44848145	Dkk1	DKK1
994	44848146	Bdnf	BDNF
995	44848147	Hoxc5	HOXC5
996	44848148	Rarg	RARG
997	44848149	Atp1a2	ATP1A2
998	44848150	Ctnnbip1	CTNNBIP1
999	44848151	Ptpra	PTPRA
1000	44848152	Dmbx1	DMBX1
1001	44848153	Mdk	MDK
1002	44848154	Tlx2	TLX2
1003	44848155	Nkx2-4	NKX2-4
1004	44848156	Gata4	GATA4
1005	44848157	Cyp26a1	CYP26A1
1006	44848158	Prph	PRPH
1007	44848159	S1pr1	S1PR1
1008	44848160	Maf	MAF
1009	44848161	Pdgfra	PDGFRA
1010	44848162	Prox1	PROX1
1011	44848163	Lmnb2	LMNB2
1012	44848164	Foxh1	FOXH1
1013	44848165	Col2a1	COL2A1
1014	44848166	Hand2	HAND2
1015	44848167	Acvr2b	ACVR2B
1016	44848168	Gja1	GJA1
1017	44848169	Lef1	LEF1
1018	44848170	Qki	QKI
1019	44848171	Nkx2-5	NKX2-5
1020	44848172	Gsk3a	GSK3A
1021	44848173	Ybx1	YBX1
1022	44848174	Ascl2	ASCL2
1023	44848175	Ascl1	ASCL1
1024	44848176	Bad	BAD
1025	44848177	Pax8	PAX8
1026	44848178	Nipsnap2	NIPSNAP2
1027	44848179	Six2	SIX2
1028	44848180	Cebpe	CEBPE
1029	44848181	Cebpa	CEBPA
1030	44848182	Mafa	MAFA
1031	44848183	Tbx6	TBX6
1032	44848184	Dedd2	DEDD2
1033	44848185	Atp1b3	ATP1B3
1034	44848186	Fbxw4	FBXW4
1035	44848187	Hsf1	HSF1
1036	44848188	B2m	B2M
1037	44848189	Isl1	ISL1
1038	44848190	Bmyc	MYC
1039	44848191	Myc	MYC
1040	44848192	Bmp7	BMP7
1041	44848193	Trp53	TP53
1042	44848194	Smad2	SMAD2
1043	44848195	Dap	DAP
1044	44848196	Hes3	HES3
1045	44848197	Ccnb1	CCNB1
1046	44848198	Tbr1	TBR1
1047	44848199	Mtmr2	MTMR2
1048	44848200	Rag2	RAG2
1049	44848201	Mtnr1a	MTNR1A
1050	44848202	H2az2	H2AZ2
1051	44848203	Vars1	VARS1
1052	44848204	Crx	CRX
1053	44848205	Dach1	DACH1
1054	44848206	Fgfr1	FGFR1
1055	44848207	Psmb7	PSMB7
1056	44848208	Cpa1	CPA1
1057	44848209	Pcdh10	PCDH10
1058	44848210	Fmr1	FMR1
1059	44848211	Oaz1	OAZ1
1060	44848212	Bbs2	BBS2
1061	44848213	Cask	CASK
1062	44848214	Hgd	HGD
1063	44848215	Plagl2	PLAGL2
1064	44848216	P2rx4	P2RX4
1065	44848217	Mst1	MST1
1066	44848217	Mst1	MST1L
1067	44848218	Gstp2	GSTP1
1068	44848219	Gstp1	GSTP1
1069	44848220	Esr1	ESR1
1070	44848221	Elf1	ELF1
1071	44848222	Elf4	ELF4
1072	44848223	Cers4	CERS4
1073	44848224	Cers2	CERS2
1074	44848225	Adcyap1	ADCYAP1
1075	44848226	Cyp11a1	CYP11A1
1076	44848227	Cyp2j8	CYP2J2
1077	44848228	Cyp2j7	CYP2J2
1078	44848229	Cyp2j12	CYP2J2
1079	44848230	Cyp2j11	CYP2J2
1080	44848231	Cyp2j5	CYP2J2
1081	44848232	Cyp2j6	CYP2J2
1082	44848233	Atp5mc3	ATP5MC3
1083	44848234	Cxadr	CXADR
1084	44848235	Glra1	GLRA1
1085	44848236	Ppara	PPARA
1086	44848237	Crybb1	CRYBB1
1087	44848238	Efna3	EFNA3
1088	44848239	mt-Nd2	ND2
1089	44848240	Ptprf	PTPRF
1090	44848241	Fzd9	FZD9
1091	44848242	Ctnna1	CTNNA1
1092	44848243	Pax5	PAX5
1093	44848244	Hoxd3	HOXD3
1094	44848245	Pou6f1	POU6F1
1095	44848246	Psme3	PSME3
1096	44848247	Smarcb1	SMARCB1
1097	44848248	Hoxb3	HOXB3
1098	44848249	Twist1	TWIST1
1099	44848250	Alas1	ALAS1
1100	44848251	Fzd10	FZD10
1101	44848252	Fzd3	FZD3
1102	44848253	Foxd2	FOXD2
1103	44848254	Blcap	BLCAP
1104	44848255	Foxg1	FOXG1
1105	44848256	Gata5	GATA5
1106	44848257	Otp	OTP
1107	44848258	Six5	SIX5
1108	44848259	Psmb6	PSMB6
1109	44848260	Efna5	EFNA5
1110	44848261	Wnt5b	WNT5B
1111	44848262	Itk	ITK
1112	44848263	Fbln1	FBLN1
1113	44848264	Id1	ID1
1114	44848265	Efnb3	EFNB3
1115	44848266	Jag1	JAG1
1116	44848267	Psap	PSAP
1117	44848268	Psapl1	PSAPL1
1118	44848269	Ppm1a	PPM1A
1119	44848270	Pbx3	PBX3
1120	44848271	Calr3	CALR3
1121	44848272	Ntn1	NTN1
1122	44848273	Efna2	EFNA2
1123	44848274	Hoxd13	HOXD13
1124	44848275	Crygf	CRYGD
1125	44848276	Crygb	CRYGB
1126	44848277	Crygc	CRYGC
1127	44848278	Cryge	CRYGD
1128	44848279	Smad5	SMAD5
1129	44848280	Fgfr4	FGFR4
1130	44848281	Hoxc12	HOXC12
1131	44848282	Ppm1b	PPM1B
1132	44848283	Fzd1	FZD1
1133	44848284	Pbx1	PBX1
1134	44848285	Nipsnap1	NIPSNAP1
1135	44848286	Clns1a	CLNS1A
1136	44848287	Dlx2	DLX2
1137	44848288	Elavl4	ELAVL4
1138	44848289	Bco2	BCO2
1139	44848290	Rara	RARA
1140	44848291	Cldn1	CLDN1
1141	44848292	Pou4f3	POU4F3
1142	44848293	Hoxa11	HOXA11
1143	44848294	Nras	NRAS
1144	44848295	Reln	RELN
1145	44848296	Has2	HAS2
1146	44848297	Sim1	SIM1
1147	44848298	Mybl2	MYBL2
1148	44848299	St8sia2	ST8SIA2
1149	44848300	Acvrl1	ACVRL1
1150	44848301	Tram1l1	TRAM1L1
1151	44848302	Tram1	TRAM1
1152	44848303	Tlx3	TLX3
1153	44848304	Tlx1	TLX1
1154	44848305	Neo1	NEO1
1155	44848306	Lmo1	LMO1
1156	44848307	Has3	HAS3
1157	44848308	Aldh3b3	ALDH3B2
1158	44848309	Aldh3b1	ALDH3B1
1159	44848310	Aldh3b2	ALDH3B2
1160	44848311	Ckb	CKB
1161	44848312	Sdc2	SDC2
1162	44848313	Mcm5	MCM5
1163	44848314	Sebox	SEBOX
1164	44848315	F10	F10
1165	44848316	Hspd1	HSPD1
1166	44848317	Ddx55	DDX55
1167	44848318	Hspe1	HSPE1
1168	44848319	Hspe1-rs1	HSPE1
1169	44848320	Thbs3	THBS3
1170	44848321	Sdad1	SDAD1
1171	44848322	Thbs4	THBS4
1172	44848323	Med29	MED29
1173	44848324	Utp25	UTP25
1174	44848325	Arl13b	ARL13B
1175	44848326	Aldh1a2	ALDH1A2
1176	44848327	Airim	AIRIM
1177	44848328	Atp6v1h	ATP6V1H
1178	44848329	Phf5a	PHF5A
1179	44848330	Ddx54	DDX54
1180	44848331	Dmrt3	DMRT3
1181	44848332	Ints7	INTS7
1182	44848333	Dag1	DAG1
1183	44848334	Mc5r	MC5R
1184	44848335	Mc4r	MC4R
1185	44848336	Lamc1	LAMC1
1186	44848337	Igfbp1	IGFBP1
1187	44848338	Tsr2	TSR2
1188	44848339	Wdr43	WDR43
1189	44848340	Nifk	NIFK
1190	44848341	Ttc27	TTC27
1191	44848342	Zcchc7	ZCCHC7
1192	44848343	Chrnb3	CHRNB3
1193	44848344	Omp	OMP
1194	44848345	Phex	PHEX
1195	44848346	Ruvbl2	RUVBL2
1196	44848347	Ruvbl1	RUVBL1
1197	44848348	Lamb1	LAMB1
1198	44848349	Ttn	TTN
1199	44848350	Rock2	ROCK2
1200	44848351	Esr2	ESR2
1201	44848352	Azin1	AZIN1
1202	44848353	Ttk	TTK
1203	44848354	Nfe2	NFE2
1204	44848355	Mpz	MPZ
1205	44848356	Smad7	SMAD7
1206	44848357	Smad3	SMAD3
1207	44848358	Epb41	EPB41
1208	44848359	Supt6	SUPT6H
1209	44848360	Rapsn	RAPSN
1210	44848361	Chrm2	CHRM2
1211	44848362	Opn4	OPN4
1212	44848363	Lmo4	LMO4
1213	44848364	Tph1	TPH1
1214	44848365	Cxcl12	CXCL12
1215	44848366	Gli1	GLI1
1216	44848367	Olig2	OLIG2
1217	44848368	Fgfr2	FGFR2
1218	44848369	Supt5	SUPT5H
1219	44848370	Nkx3-2	NKX3-2
1220	44848371	Sall3	SALL3
1221	44848372	Sall1	SALL1
1222	44848373	Nmrk2	NMRK2
1223	44848374	Mib1	MIB1
1224	44848375	Npas2	NPAS2
1225	44848376	Wnt10b	WNT10B
1226	44848377	Krt18	KRT18
1227	44848378	Zdhhc8	ZDHHC8
1228	44848379	Avp	AVP
1229	44848380	Oxt	OXT
1230	44848381	Cntn1	CNTN1
1231	44848382	Txnrd3	TXNRD3
1232	44848383	Sp5	SP5
1233	44848384	Mc1r	MC1R
1234	44848385	Mc2r	MC2R
1235	44848386	Mc3r	MC3R
1236	44848387	Mchr1	MCHR1
1237	44848388	Prl	PRL
1238	44848400	Tshb	TSHB
1239	44848401	Pomc	POMC
1240	44848402	Nrarp	NRARP
1241	44848403	Nrp1	NRP1
1242	44848404	Myl4	MYL4
1243	44848405	Tnnc1	TNNC1
1244	44848406	Pbk	PBK
1245	44848407	Actb	ACTB
1246	44848408	Actg1	ACTG1
1247	44848409	Fzd4	FZD4
1248	44848410	Mpp7	MPP7
1249	44848411	Ccnd1	CCND1
1250	44848412	Fn1	FN1
1251	44848413	Hoxc13	HOXC13
1252	44848414	Nccrp1	NCCRP1
1253	44848415	Pdx1	PDX1
1254	44848416	Csnk2a2	CSNK2A2
1255	44848417	Hoxa5	HOXA5
1256	44848418	Rrm2	RRM2
1257	44848419	Khdrbs1	KHDRBS1
1258	44848420	Dlx3	DLX3
1259	44848421	Ehmt2	EHMT2
1260	44848422	Stat1	STAT1
1261	44848423	Sry	SRY
1262	44848424	Casp3	CASP3
1263	44848425	Nanos3	NANOS3
1264	44848426	Ptprs	PTPRS
1265	44848427	Lactb	LACTB
1266	44848428	Kifc5b	KIFC1
1267	44848429	Kifc1	KIFC1
1268	44848430	Tenm4	TENM4
1269	44848431	Sema3a	SEMA3A
1270	44848432	Coil	COIL
1271	44848433	Ngf	NGF
1272	44848434	Csnk2a1	CSNK2A3
1273	44848434	Csnk2a1	CSNK2A1
1274	44848435	Mdm2	MDM2
1275	44848436	Eya1	EYA1
1276	44848437	Zic2	ZIC2
1277	44848438	Dtx1	DTX1
1278	44848439	Atp1a3	ATP1A3
1279	44848440	Irx1	IRX1
1280	44848441	mt-Co3	COX3
1281	44848442	Robo2	ROBO2
1282	44848443	Cntn2	CNTN2
1283	44848444	Rrm1	RRM1
1284	44848445	Pgr	PGR
1285	44848446	Per3	PER3
1286	44848447	Pim2	PIM2
1287	44848448	Evx2	EVX2
1288	44848449	Pycard	PYCARD
1289	44848450	Gata6	GATA6
1290	44848451	Atoh1	ATOH1
1291	44848452	Hoxb7	HOXB7
1292	44848453	Mid1ip1	MID1IP1
1293	44848454	Mapk8	MAPK8
1294	44848455	Raf1	RAF1
1295	44848456	Ntrk1	NTRK1
1296	44848457	Tap2	TAP2
1297	44848458	Bco1	BCO1
1298	44848459	Nkx2-3	NKX2-3
1299	44848460	Dmrt2	DMRT2
1300	44848461	Copz1	COPZ1
1301	44848462	Smarca4	SMARCA4
1302	44848463	Pax7	PAX7
1303	44848464	Foxa2	FOXA2
1304	44848465	Star	STAR
1305	44848466	Fzd2	FZD2
1306	44848467	Sox17	SOX17
1307	44848468	Foxi2	FOXI2
1308	44848469	Foxi1	FOXI1
1309	44848470	Gpr173	GPR173
1310	44848471	Esrra	ESRRA
1311	44848472	Pparg	PPARG
1312	44848473	Vipr2	VIPR2
1313	44848474	Lcp1	LCP1
1314	44848475	Axin2	AXIN2
1315	44848476	Bambi	BAMBI
1316	44848477	Clic3	CLIC3
1317	44848478	Pnpla7	PNPLA7
1318	44848479	Zeb1	ZEB1
1319	44848480	Cldn12	CLDN12
1320	44848481	mt-Co1	COX1
1321	44848482	Hnf1b	HNF1B
1322	44848483	Th	TH
1323	44848484	Nkx2-2	NKX2-2
1324	44848485	Igfbp2	IGFBP2
1325	44848486	Noto	NOTO
1326	44848487	Mixl1	MIXL1
1327	44848488	Lsm2	LSM2
1328	44848489	Stk19	STK19
1329	44848490	Slc40a1	SLC40A1
1330	44848491	Gata3	GATA3
1331	44848492	Hmx3	HMX3
1332	44848493	Try10	PRSS3P2
1333	44848493	Try10	PRSS1
1334	44848493	Try10	PRSS2
1335	44848494	Prss1l	PRSS1
1336	44848494	Prss1l	PRSS3P2
1337	44848494	Prss1l	PRSS2
1338	44848495	Prss1	PRSS2
1339	44848495	Prss1	PRSS1
1340	44848495	Prss1	PRSS3P2
1341	44848496	Try5	PRSS3P2
1342	44848496	Try5	PRSS2
1343	44848496	Try5	PRSS3
1344	44848496	Try5	PRSS1
1345	44848496	Try5	PRSS3P2
1346	44848496	Try5	PRSS2
1347	44848496	Try5	PRSS3
1348	44848496	Try5	PRSS1
1349	44848497	Prss2	PRSS2
1350	44848499	Try4	PRSS2
1351	44848499	Try4	PRSS3
1352	44848499	Try4	PRSS1
1353	44848499	Try4	PRSS3P2
1354	44848501	Prss3	PRSS2
1355	44848501	Prss3	PRSS3P2
1356	44848501	Prss3	PRSS1
1357	44848503	Prss3l	PRSS2
1358	44848503	Prss3l	PRSS1
1359	44848503	Prss3l	PRSS3P2
1360	44848504	Rack1	RACK1
1361	44848505	Slc6a3	SLC6A3
1362	44848506	Hes1	HES1
1363	44848507	Mitf	MITF
1364	44848508	Timp2	TIMP2
1365	44848509	Dusp6	DUSP6
1366	44848510	Tgfbr2	TGFBR2
1367	44848511	Tgfb1	TGFB1
1368	44848512	Hic2	HIC2
1369	44848513	Ptn	PTN
1370	44848514	Anxa1	ANXA1
1371	44848515	Anxa2	ANXA2P2
1372	44848515	Anxa2	ANXA2
1373	44848516	Anxa5	ANXA5
1374	44848517	Anxa6	ANXA6
1375	44848518	Anxa11	ANXA11
1376	44848519	Anxa4	ANXA4
1377	44848520	Zic3	ZIC3
1378	44848521	Gpm6a	GPM6A
1379	44848522	Gpm6b	GPM6B
1380	44848523	Plp2	PLP2
1381	44848524	Prp2rt	PLP2
1382	44848525	F5	F5
1383	44848526	Tfpi	TFPI
1384	44848527	Serpind1	SERPIND1
1385	44848528	Atp6v1b2	ATP6V1B2
1386	44848529	Hsd17b8	HSD17B8
1387	44848530	Plg	PLG
1388	44848531	Fgf18	FGF18
1389	44848532	Serpinc1	SERPINC1
1390	44848533	F9	F9
1391	44848534	Elk4	ELK4
1392	44848535	Snd1	SND1
1393	44848536	Fgf10	FGF10
1394	44848537	Wnt2b	WNT2B
1395	44848538	Slc26a5	SLC26A5
1396	44848539	Crabp2	CRABP2
1397	44848540	Vsx2	VSX2
1398	44848541	Crabp1	CRABP1
1399	44848542	Glul	GLUL
1400	44848543	Dixdc1	DIXDC1
1401	44848544	Mx2	MX2
1402	44848544	Mx2	MX1
1403	44848545	Ifnb1	IFNB1
1404	44848546	Msgn1	MSGN1
1405	44848547	Mapk1	MAPK1
1406	44848548	Keap1	KEAP1
1407	44848549	Dcp1a	DCP1A
1408	44848550	Nfe2l2	NFE2L2
1409	44848551	Sgce	SGCE
1410	44848552	Gnrh1	GNRH1
1411	44848553	Tgfbi	TGFBI
1412	44848554	Prickle1	PRICKLE1
1413	44848555	Prickle2	PRICKLE2
1414	44848556	Col18a1	COL18A1
1415	44848557	Per2	PER2
1416	44848558	Msh6	MSH6
1417	44848559	Rgs9bp	RGS9BP
1418	44848560	Paqr7	PAQR7
1419	44848561	Paqr8	PAQR8
1420	44848562	Tmpo	TMPO
1421	44848563	Penk	PENK
1422	44848564	Fgf15	FGF19
1423	44848565	LTO1	LTO1
1424	44848566	Oprk1	OPRK1
1425	44848567	Scfd1	SCFD1
1426	44848568	Neurod4	NEUROD4
1427	44848569	Sestd1	SESTD1
1428	44848570	Calm3	CALM3
1429	44848571	Calm2	CALM2
1430	44848572	Calm1	CALM1
1431	44848573	Sult1a1	SULT1A1
1432	44848573	Sult1a1	SULT1A2
1433	44848573	Sult1a1	SULT1A3
1434	44848573	Sult1a1	SULT1A4
1435	44848574	Sult1b1	SULT1B1
1436	44848575	Sult1e1	SULT1E1
1437	44848576	Ocm	OCM
1438	44848576	Ocm	OCM2
1439	44848577	Tbx1	TBX1
1440	44848578	Pdgfrb	PDGFRB
1441	44848579	Col1a2	COL1A2
1442	44848580	Col1a1	COL1A1
1443	44848581	Npff	NPFF
1444	44848582	Plp1	PLP1
1445	44848583	Hba-a1	HBA2
1446	44848583	Hba-a1	HBA1
1447	44848584	Fbxl14	FBXL14
1448	44848585	Mga	MGA
1449	44848586	Tcf7l2	TCF7L2
1450	44848587	Sst	SST
1451	44848588	Cort	CORT
1452	44848589	Piwil1	PIWIL1
1453	44848590	H1f8	H1-8
1454	44848591	Bdkrb1	BDKRB1
1455	44848592	Trp73	TP73
1456	44848593	Tmem35a	TMEM35A
1457	44848594	Drd2	DRD2
1458	44848595	Drd3	DRD3
1459	44848596	Tnr	TNR
1460	44848597	Cd99l2	CD99L2
1461	44848598	Zar1	ZAR1
1462	44848599	Trp63	TP63
1463	44848600	Stat5a	STAT5A
1464	44848601	Stat5b	STAT5B
1465	44848602	Kif1b	KIF1B
1466	44848603	Hnf4a	HNF4A
1467	44848604	Xpo6	XPO6
1468	44848605	Arpc5	ARPC5
1469	44848606	Tshz1	TSHZ1
1470	44848607	Tgfb2	TGFB2
1471	44848608	Tgfb3	TGFB3
1472	44848609	Aldob	ALDOB
1473	44848610	Aldoc	ALDOC
1474	44848611	Esrrg	ESRRG
1475	44848614	Ptma	PTMA
1476	44848615	Tuba1b	TUBA1B
1477	44848616	Tuba1c	TUBA1C
1478	44848617	Pals1	PALS1
1479	44848618	Birc2	BIRC2
1480	44848619	Birc3	BIRC3
1481	44848620	Xiap	XIAP
1482	44848620	Xiap	BIRC8
1483	44848621	Bcl2l10	BCL2L10
1484	44848622	Casp2	CASP2
1485	44848623	Casp6	CASP6
1486	44848624	Casp9	CASP9
1487	44848625	Birc5	BIRC5
1488	44848626	Casp8ap2	CASP8AP2
1489	44848627	Thoc1	THOC1
1490	44848628	Tmbim6	TMBIM6
1491	44848629	Aifm1	AIFM1
1492	44848630	Celf2	CELF2
1493	44848631	Cflar	CFLAR
1494	44848632	Dffb	DFFB
1495	44848633	Tnfrsf10b	TNFRSF10C
1496	44848633	Tnfrsf10b	TNFRSF10B
1497	44848633	Tnfrsf10b	TNFRSF10D
1498	44848633	Tnfrsf10b	TNFRSF10A
1499	44848635	Map3k5	MAP3K5
1500	44848636	Tpbg	TPBG
1501	44848637	Nusap1	NUSAP1
1502	44848638	P4ha2	P4HA2
1503	44848639	Nid2	NID2
1504	44848640	Rnf2	RNF2
1505	44848641	Rbm38	RBM38
1506	44848642	Hes6	HES6
1507	44848643	Mknk2	MKNK2
1508	44848644	Btbd2	BTBD2
1509	44848645	Figla	FIGLA
1510	44848646	Septin9	SEPTIN9
1511	44848647	Zp3	ZP3
1512	44848648	Rbm19	RBM19
1513	44848649	Fmo6	FMO6P
1514	44848651	Fmo3	FMO3
1515	44848652	Fmo5	FMO5
1516	44848653	Fmo2	FMO2
1517	44848654	Fmo1	FMO1
1518	44848656	Sult2a4	SULT2A1
1519	44848657	Sult2a5	SULT2A1
1520	44848658	Sult2a2	SULT2A1
1521	44848659	Sult2a6	SULT2A1
1522	44848660	Sult2a7	SULT2A1
1523	44848661	Sult2a3	SULT2A1
1524	44848662	Sult2b1	SULT2B1
1525	44848663	Sult2a8	SULT2A1
1526	44848664	Sult2a1	SULT2A1
1527	44848665	Foxi3	FOXI3
1528	44848666	Etfa	ETFA
1529	44848667	Baiap2l1	BAIAP2L1
1530	44848668	P2rx1	P2RX1
1531	44848669	P2rx2	P2RX2
1532	44848670	P2rx7	P2RX7
1533	44848671	P2rx5	P2RX5
1534	44848672	Sp4	SP4
1535	44848673	Hells	HELLS
1536	44848674	Mmp14	MMP14
1537	44848675	Mien1	MIEN1
1538	44848676	Fam107b	FAM107B
1539	44848677	Fstl1	FSTL1
1540	44848678	Gpc3	GPC3
1541	44848679	Elf2	ELF2
1542	44848680	Cbfb	CBFB
1543	44848681	Mbtps1	MBTPS1
1544	44848682	Ldlr	LDLR
1545	44848683	Ahcyl	AHCY
1546	44848684	Ahcy	AHCY
1547	44848685	Ctps1	CTPS1
1548	44848686	Kdm7a	KDM7A
1549	44848687	Ctsf	CTSF
1550	44848688	Trip11	TRIP11
1551	44848689	Rgs4	RGS4
1552	44848690	Rrbp1	RRBP1
1553	44848691	Ccnb2	CCNB2
1554	44848692	Pxn	PXN
1555	44848693	Mbtps2	MBTPS2
1556	44848694	Mylip	MYLIP
1557	44848695	Chrna2	CHRNA2
1558	44848696	Chrna7	CHRFAM7A
1559	44848696	Chrna7	CHRNA7
1560	44848697	Rad21	RAD21
1561	44848698	Nop56	NOP56
1562	44848699	Cul3	CUL3
1563	44848700	Nudt10	NUDT11
1564	44848700	Nudt10	NUDT10
1565	44848701	Nudt4	NUDT4
1566	44848701	Nudt4	NUDT4B
1567	44848702	Nudt11	NUDT10
1568	44848702	Nudt11	NUDT11
1569	44848703	Dcaf4	DCAF4
1570	44848703	Dcaf4	DCAF4L2
1571	44848703	Dcaf4	DCAF4L1
1572	44848704	Lnpk	LNPK
1573	44848705	Ing3	ING3
1574	44848706	Dtnb	DTNB
1575	44848707	Mars1	MARS1
1576	44848708	Arrdc2	ARRDC2
1577	44848709	Wdr82	WDR82
1578	44848710	Mettl26	METTL26
1579	44848711	Tsc22d2	TSC22D2
1580	44848712	Rap1b	RAP1B
1581	44848712	Rap1b	RAP1BL
1582	44848713	Lrrfip2	LRRFIP2
1583	44848714	Ccng1	CCNG1
1584	44848715	Agfg1	AGFG1
1585	44848716	Sox7	SOX7
1586	44848717	Rps24	RPS24
1587	44848718	Ktn1	KTN1
1588	44848719	Cpne1	CPNE1
1589	44848720	Epb41l5	EPB41L5
1590	44848721	Hmmr	HMMR
1591	44848722	Cdc42se1	CDC42SE1
1592	44848723	Bnip2	BNIP2
1593	44848724	Hdac9	HDAC9
1594	44848725	Poc1b	POC1B
1595	44848726	Aph1c	APH1B
1596	44848727	Aph1b	APH1B
1597	44848728	B3gnt7	B3GNT7
1598	44848729	Zfp207	ZNF207
1599	44848730	Yars1	YARS1
1600	44848731	Tekt2	TEKT2
1601	44848732	Tkt	TKT
1602	44848733	Tktl1	TKTL1
1603	44848734	Tktl2	TKTL2
1604	44848735	Pnoc	PNOC
1605	44848736	Pcm1	PCM1
1606	44848737	Atic	ATIC
1607	44848738	Ypel3	YPEL3
1608	44848739	Eif3d	EIF3D
1609	44848740	Tal2	TAL2
1610	44848741	Id2	ID2
1611	44848742	Ssr1	SSR1
1612	44848743	Kpna3	KPNA3
1613	44848744	Fancd2	FANCD2
1614	44848745	Ap3m1	AP3M1
1615	44848746	Gfi1	GFI1
1616	44848747	Uchl1	UCHL1
1617	44848748	Set	SETSIP
1618	44848748	Set	SET
1619	44848749	Clic4	CLIC4
1620	44848750	Mapk3	MAPK3
1621	44848751	Sh3gl3	SH3GL3
1622	44848752	Dicer1	DICER1
1623	44848753	Hccs	HCCS
1624	44848754	Hnf1a	HNF1A
1625	44848755	Cdkn1c	CDKN1C
1626	44848756	Zfr	ZFR
1627	44848757	Gcnt4	GCNT4
1628	44848758	Hmgxb4	HMGXB4
1629	44848759	Nup50	NUP50
1630	44848760	Nup50l	NUP50
1631	44848761	Tagln2	TAGLN2
1632	44848762	Fgfrl1	FGFRL1
1633	44848763	Trim71	TRIM71
1634	44848764	Coro1a	CORO1A
1635	44848765	Gabarap	GABARAP
1636	44848766	Dact2	DACT2
1637	44848767	Ptpn6	PTPN6
1638	44848768	Sf1	SF1
1639	44848769	Slc11a1	SLC11A1
1640	44848770	Slc11a2	SLC11A2
1641	44848771	Insig1	INSIG1
1642	44848772	Epx	EPX
1643	44848773	Lpo	LPO
1644	44848774	Mpo	MPO
1645	44848775	Insig2	INSIG2
1646	44848776	Mdh1	MDH1
1647	44848777	Cox5a	COX5A
1648	44848779	Fhl1	FHL1
1649	44848780	Mt4	MT4
1650	44848781	Mt3	MT3
1651	44848782	Mt2	MT1B
1652	44848782	Mt2	MT1L
1653	44848782	Mt2	MT1A
1654	44848782	Mt2	MT1H
1655	44848782	Mt2	MT1E
1656	44848782	Mt2	MT1F
1657	44848782	Mt2	MT2A
1658	44848782	Mt2	MT1X
1659	44848782	Mt2	MT1G
1660	44848783	Mt1	MT1B
1661	44848783	Mt1	MT1E
1662	44848783	Mt1	MT1G
1663	44848783	Mt1	MT1H
1664	44848783	Mt1	MT1L
1665	44848783	Mt1	MT1M
1666	44848783	Mt1	MT1X
1667	44848783	Mt1	MT1A
1668	44848783	Mt1	MT1F
1669	44848784	Rrp1	RRP1
1670	44848785	Rrp1b	RRP1B
1671	44848786	Tyr	TYR
1672	44848787	Cyfip1	CYFIP1
1673	44848788	Smtnl2	SMTNL2
1674	44848789	Mbd3	MBD3
1675	44848790	Mbd1	MBD1
1676	44848791	Mecp2	MECP2
1677	44848792	Mbd4	MBD4
1678	44848793	Cyp17a1	CYP17A1
1679	44848794	Naa15	NAA15
1680	44848795	Mbd2	MBD2
1681	44848796	Ube2l3	UBE2L3
1682	44848797	Drg1	DRG1
1683	44848798	Foxn1	FOXN1
1684	44848799	Mgll	MGLL
1685	44848800	Prdm1	PRDM1
1686	44848801	Foxn3	FOXN3
1687	44848802	Trf	TF
1688	44848804	Ltf	LTF
1689	44848805	Has1	HAS1
1690	44848806	Psenen	PSENEN
1691	44848807	Sarm1	SARM1
1692	44848808	Tirap	TIRAP
1693	44848809	Il1rapl2	IL1RAPL2
1694	44848810	Tlr2	TLR2
1695	44848811	Tlr3	TLR3
1696	44848812	Eif2s1	EIF2S1
1697	44848813	Tlr4	TLR4
1698	44848814	Ticam1	TICAM1
1699	44848815	Tlr9	TLR9
1700	44848816	Tlr7	TLR7
1701	44848817	Frmpd4	FRMPD4
1702	44848818	Tlr8	TLR8
1703	44848819	Tlr5	TLR5
1704	44848820	Myd88	MYD88
1705	44848821	Tlr6	TLR6
1706	44848822	Tlr1	TLR1
1707	44848825	Tlr12	TLR12P
1708	44848826	Acta2	ACTA2
1709	44848827	Pgp	PGP
1710	44848828	Srsf5	SRSF5
1711	44848829	Hnrnpa0	HNRNPA0
1712	44848830	Poldip2	POLDIP2
1713	44848831	Rbmxl2	RBMXL2
1714	44848833	Rbmx	RBMX
1715	44848834	Rbmxl1	RBMXL1
1716	44848835	Asap3	ASAP3
1717	44848836	Cdk1	CDK1
1718	44848837	Dlg5	DLG5
1719	44848838	Cox4i1	COX4I1
1720	44848839	Stom	STOM
1721	44848840	Adh4	ADH4
1722	44848842	Adh1	ADH1A
1723	44848842	Adh1	ADH1C
1724	44848842	Adh1	ADH1B
1725	44848843	Adh7	ADH7
1726	44848844	Adh6b	ADH6
1727	44848845	Chm	CHM
1728	44848846	Chml	CHML
1729	44848847	Slc39a1	SLC39A1
1730	44848848	Slc39a2	SLC39A2
1731	44848849	Pah	PAH
1732	44848850	Eif1	EIF1
1733	44848851	Pofut1	POFUT1
1734	44848852	Sh3bp4	SH3BP4
1735	44848853	Vegfc	VEGFC
1736	44848854	Dab2	DAB2
1737	44848855	Agrn	AGRN
1738	44848856	Cct5	CCT5
1739	44848857	Nos2	NOS2
1740	44848858	Dnd1	DND1
1741	44848859	Traf4	TRAF4
1742	44848860	Osbpl2	OSBPL2
1743	44848861	Casc3	CASC3
1744	44848862	Adra2a	ADRA2A
1745	44848863	Larp1	LARP1
1746	44848864	Zcchc10	ZCCHC10
1747	44848865	Cdk9	CDK9
1748	44848866	Dpp3	DPP3
1749	44848867	Dlat	DLAT
1750	44848868	Atrx	ATRX
1751	44848869	Adra2b	ADRA2B
1752	44848870	Tmem30a	TMEM30A
1753	44848871	Wtap	WTAP
1754	44848872	Yy1	YY1
1755	44848873	Pik3r2	PIK3R2
1756	44848874	Adra2c	ADRA2C
1757	44848875	Myf6	MYF6
1758	44848876	Rtn4r	RTN4R
1759	44848877	Rdh8	RDH8
1760	44848878	Sfrp1	SFRP1
1761	44848879	Gja10	GJA10
1762	44848880	Rtn4rl2	RTN4RL2
1763	44848881	Rtn4rl1	RTN4RL1
1764	44848882	Dcps	DCPS
1765	44848883	Ccna1	CCNA1
1766	44848884	Rtca	RTCA
1767	44848885	Grn	GRN
1768	44848886	Crim1	CRIM1
1769	44848887	Cnr1	CNR1
1770	44848888	Oprl1	OPRL1
1771	44848889	Prelid3b	PRELID3B
1772	44848890	Fxr1	FXR1
1773	44848891	Chst11	CHST11
1774	44848892	Higd1a	HIGD1A
1775	44848893	Arpc1a	ARPC1A
1776	44848894	Cyb5r1	CYB5R1
1777	44848895	Prxl2a	PRXL2A
1778	44848896	Ptf1a	PTF1A
1779	44848897	Fgf2	FGF2
1780	44848898	Aplp1	APLP1
1781	44848899	Igfbp5	IGFBP5
1782	44848900	Pdcl3	PDCL3
1783	44848901	Rhoa	RHOA
1784	44848902	Ric3	RIC3
1785	44848903	Uros	UROS
1786	44848904	Hcrt	HCRT
1787	44848905	Zcchc17	ZCCHC17
1788	44848906	Bnip3l	BNIP3L
1789	44848907	Cnbp	CNBP
1790	44848908	Ncs1	NCS1
1791	44848909	Maob	MAOB
1792	44848910	Maoa	MAOA
1793	44848911	Cbx4	CBX4
1794	44848912	Cops7b	COPS7B
1795	44848913	Cops7a	COPS7A
1796	44848914	Ddx5	DDX5
1797	44848915	Hmgcr	HMGCR
1798	44848916	Chst14	CHST14
1799	44848917	Pou4f2	POU4F2
1800	44848918	Cbx8	CBX8
1801	44848919	Fgr	FGR
1802	44848920	S100a4	S100A4
1803	44848921	S100a6	S100A6
1804	44848922	Ddx59	DDX59
1805	44848923	Usf2	USF2
1806	44848924	Dlec1	DLEC1
1807	44848925	Gjb2	GJB2
1808	44848926	Gjb6	GJB6
1809	44848927	Gjb4	GJB4
1810	44848928	Gjb5	GJB5
1811	44848929	Cdkn1b	CDKN1B
1812	44848930	Arsk	ARSK
1813	44848931	Rhoh	RHOH
1814	44848932	Dnm2	DNM2
1815	44848933	Prkcg	PRKCG
1816	44848934	Tgm1	TGM1
1817	44848935	Slc6a1	SLC6A1
1818	44848936	Gnb1	GNB1
1819	44848937	Fhip2b	FHIP2B
1820	44848938	Garnl3	GARNL3
1821	44848939	Dhrsx	DHRSX
1822	44848940	Kctd14	KCTD14
1823	44848941	Crk	CRK
1824	44848942	Reg4	REG4
1825	44848943	Ndufb7	NDUFB7
1826	44848944	Sfswap	SFSWAP
1827	44848945	Kcnt1	KCNT1
1828	44848946	Dlg2	DLG2
1829	44848947	Atrn	ATRN
1830	44848948	Arap1	ARAP1
1831	44848949	Iars1	IARS1
1832	44848950	Spryd3	SPRYD3
1833	44848951	Rbm45	RBM45
1834	44848952	Spen	SPEN
1835	44848953	Trim11	TRIM11
1836	44848954	Trim58	TRIM58
1837	44848955	Trim17	TRIM17
1838	44848956	Cherp	CHERP
1839	44848957	Gja5	GJA5
1840	44848958	Fga	FGA
1841	44848959	Elovl5	ELOVL5
1842	44848960	Bcor	BCOR
1843	44848960	Bcor	BCORP1
1844	44848961	Gja3	GJA3
1845	44848962	Mnx1	MNX1
1846	44848963	Igfbp3	IGFBP3
1847	44848964	Mtx1	MTX1
1848	44848965	Slc31a1	SLC31A1
1849	44848966	Cav1	CAV1
1850	44848967	Mtx2	MTX2
1851	44848968	Mtx3	MTX3
1852	44848969	Fgf6	FGF6
1853	44848970	Per1	PER1
1854	44848971	Hey1	HEY1
1855	44848972	Mttp	MTTP
1856	44848973	Alpl	ALPL
1857	44848974	Tubb5	TUBB
1858	44848975	Astl	ASTL
1859	44848976	Hsd17b4	HSD17B4
1860	44848977	Eif4e	EIF4E
1861	44848978	Dand5	DAND5
1862	44848979	Cer1	CER1
1863	44848980	Cbr1	CBR1
1864	44848981	Cbr3	CBR3
1865	44848982	Cbr1b	CBR1
1866	44848983	Ripk2	RIPK2
1867	44848984	Cyp1b1	CYP1B1
1868	44848985	Plcg1	PLCG1
1869	44848986	Cadps2	CADPS2
1870	44848987	Nr1i2	NR1I2
1871	44848988	Cbx2	CBX2
1872	44848989	Eif3c	EIF3C
1873	44848989	Eif3c	EIF3CL
1874	44848990	Bmi1	COMMD3-BMI1
1875	44848990	Bmi1	BMI1
1876	44848991	Cdk8	CDK8
1877	44848992	Pde6g	PDE6G
1878	44848993	Ppp2r5e	PPP2R5E
1879	44848994	Vax2	VAX2
1880	44848995	Vax1	VAX1
1881	44848996	Gngt2	GNGT2
1882	44848997	Gabbr1	GABBR1
1883	44848998	Gad1	GAD1
1884	44848999	Hs6st2	HS6ST2
1885	44849000	Cdh17	CDH17
1886	44849001	Gjd2	GJD2
1887	44849002	Daam1	DAAM1
1888	44849003	Prps1	PRPS1
1889	44849005	Disp1	DISP1
1890	44849006	Calcoco1	CALCOCO1
1891	44849007	Atf2	ATF2
1892	44849008	Grem2	GREM2
1893	44849009	Sbf2	SBF2
1894	44849010	Aaas	AAAS
1895	44849011	Ank	ANKH
1896	44849012	Fbxl3	FBXL3
1897	44849013	Dhcr7	DHCR7
1898	44849014	Hcfc1	HCFC1
1899	44849015	Usp16	USP16
1900	44849016	Bmp8a	BMP8A
1901	44849016	Bmp8a	BMP8B
1902	44849017	Bmp8b	BMP8B
1903	44849018	Hnrnpa1	HNRNPA1L2
1904	44849018	Hnrnpa1	HNRNPA1
1905	44849020	Hdlbp	HDLBP
1906	44849021	Hfe	HFE
1907	44849022	H2-T26	HLA-B
1908	44849022	H2-T26	HLA-C
1909	44849022	H2-T26	HLA-E
1910	44849022	H2-T26	HLA-F
1911	44849022	H2-T26	HLA-G
1912	44849022	H2-T26	HLA-H
1913	44849022	H2-T26	HLA-A
1914	44849023	H2-M10.6	HLA-E
1915	44849023	H2-M10.6	HLA-F
1916	44849023	H2-M10.6	HLA-G
1917	44849023	H2-M10.6	HLA-B
1918	44849023	H2-M10.6	HLA-C
1919	44849024	H2-M10.2	HLA-E
1920	44849024	H2-M10.2	HLA-F
1921	44849024	H2-M10.2	HLA-G
1922	44849024	H2-M10.2	HLA-C
1923	44849024	H2-M10.2	HLA-B
1924	44849025	H2-T25	HLA-B
1925	44849025	H2-T25	HLA-E
1926	44849025	H2-T25	HLA-F
1927	44849025	H2-T25	HLA-C
1928	44849026	H2-T27	HLA-F
1929	44849027	H2-T23	HLA-E
1930	44849028	H2-M9	HLA-C
1931	44849028	H2-M9	HLA-E
1932	44849028	H2-M9	HLA-B
1933	44849030	H2-M10.5	HLA-E
1934	44849030	H2-M10.5	HLA-B
1935	44849030	H2-M10.5	HLA-C
1936	44849031	H2-M11	HLA-B
1937	44849031	H2-M11	HLA-G
1938	44849031	H2-M11	HLA-E
1939	44849031	H2-M11	HLA-F
1940	44849031	H2-M11	HLA-C
1941	44849032	H2-Q6	HLA-G
1942	44849032	H2-Q6	HLA-E
1943	44849032	H2-Q6	HLA-F
1944	44849032	H2-Q6	HLA-A
1945	44849032	H2-Q6	HLA-C
1946	44849032	H2-Q6	HLA-B
1947	44849033	H2-Bl	HLA-B
1948	44849033	H2-Bl	HLA-C
1949	44849033	H2-Bl	HLA-E
1950	44849033	H2-Bl	HLA-A
1951	44849034	H2-M5	HLA-C
1952	44849034	H2-M5	HLA-E
1953	44849034	H2-M5	HLA-F
1954	44849034	H2-M5	HLA-B
1955	44849034	H2-M5	HLA-G
1956	44849036	H2-M10.1	HLA-C
1957	44849036	H2-M10.1	HLA-E
1958	44849036	H2-M10.1	HLA-F
1959	44849036	H2-M10.1	HLA-G
1960	44849036	H2-M10.1	HLA-B
1961	44849037	H2-M3	HLA-G
1962	44849038	H2-K1	HLA-B
1963	44849038	H2-K1	HLA-C
1964	44849038	H2-K1	HLA-A
1965	44849038	H2-K1	HLA-F
1966	44849038	H2-K1	HLA-G
1967	44849038	H2-K1	HLA-E
1968	44849039	H2-Q10	HLA-B
1969	44849039	H2-Q10	HLA-E
1970	44849039	H2-Q10	HLA-F
1971	44849039	H2-Q10	HLA-G
1972	44849039	H2-Q10	HLA-C
1973	44849039	H2-Q10	HLA-A
1974	44849040	H2-Q4	HLA-B
1975	44849040	H2-Q4	HLA-C
1976	44849040	H2-Q4	HLA-A
1977	44849040	H2-Q4	HLA-E
1978	44849041	H2-Q7	HLA-F
1979	44849041	H2-Q7	HLA-A
1980	44849041	H2-Q7	HLA-B
1981	44849041	H2-Q7	HLA-E
1982	44849041	H2-Q7	HLA-C
1983	44849041	H2-Q7	HLA-G
1984	44849042	H2-T3	HLA-C
1985	44849042	H2-T3	HLA-E
1986	44849042	H2-T3	HLA-B
1987	44849043	H2-D1	HLA-C
1988	44849043	H2-D1	HLA-E
1989	44849043	H2-D1	HLA-B
1990	44849043	H2-D1	HLA-G
1991	44849043	H2-D1	HLA-H
1992	44849043	H2-D1	HLA-A
1993	44849043	H2-D1	HLA-F
1994	44849044	H2-M10.4	HLA-C
1995	44849044	H2-M10.4	HLA-B
1996	44849044	H2-M10.4	HLA-F
1997	44849044	H2-M10.4	HLA-G
1998	44849044	H2-M10.4	HLA-E
1999	44849045	H2-M10.3	HLA-B
[truncated: 22,614 more rows]
