# Supplementary material for: Aneuploidy drives the acquisition of cancer-specific driver genes
Source: Research Square preprint supplement (doi:10.21203/rs.3.rs-4941895/v1), 2024-09-04
Supplement: Supplementary file 4 [file 99d65bf446f26ff5c682c8f1.xlsx]

## Sheet: Genotyping
Mouse Line	Full Name	Strain	Source	Primer Sequences	Note
Pten floxed	B6.129S4-Ptentm1Hwu/J	006440	The Jackson Laboratory	ACTCAAGGCAGGGATGAGC	Use all three primers in a single reaction.
				AATCTAGGGCCTCTTGTGCC
				GCTTGATATCGAATTCCTGCAGC
Trp53 floxed	B6.129P2-Trp53tm1Brn/J	008462	The Jackson Laboratory	GGTTAAACCCAGCTTGACCA
				GGAGGCAGAGACAGTTGGAG
Rb1 floxed	Rb1tm2Brn/J	0026563	The Jackson Laboratory	CTCATGGACTAGGTTAAGTTGTGG
				GCATTTAATTGTCCCCTAATCC
LSL-Cas9-EGFP	Gt(ROSA)26Sortm1(CAG-xstpx-cas9,-EGFP)Fezh/J	026175	The Jackson Laboratory	AAGGGAGCTGCAGTGGAGTA	The first two primers used in combination detect a wildtype Rosa26 locus.
				CCGAAAATCTGTGGGAAGTC
				TGAGCGACATCCTGAGAGTG	The last two primers used in combination detect the presence of Cas9 in the Rosa26R locus.
				GAGAGCTTTCAGCAGGGTCA
Mettl14 floxed	Mettl14tm1.1Chhe		Dr. Chuan He, Howard Hughes Medical Institute. (doi: 10.1016/j.cell.2017.09.003)	CTGCCAAGAAAATGGGAAAA	Use all three primers in a single reaction.
				TGCAGCCCCACAATTATAGC
				GGGACTGGGAACACTTGAAA
LSL-Pik3ca H1047R	Gt(ROSA)26Sortm1(Pik3ca*H1047R)Egan		Dr. Sean E. Egan, The Hospital for Sick Children. (doi: 10.1158/0008-5472.CAN-10-0738)	AAAGTCGCTCTGAGTTGTTAT	Common primer to both reactions.
				GCGAAGAGTTTGTCCTCAACC	This primer in combination with the first primer (common) produces a band for a wildtype Rosa26 locus
				GGAGCGGGAGAAATGGATATG	This primer in combination with the first primer (common) produces a band for Pi3kca-H1047R in the Rosa26 locus

## Sheet: qRT-PCR
Target	Accession Number	Species	Forward Primer	Reverse Primer
Ppib	NM_011149.2	Mouse	CAACGATAAGAAGAAGGGACCTAAA	CGTCCTACAGATTCATCTCCAATTT
Erbb2	NM_001003817.1	Mouse	GCAAGCACTGTCTGCCATGC	GGGCACAAGCCTCACACTGG
Esr1	NM_007956.5	Mouse	GTGCTTCAACATTCTCCCTCCTC	AATTCTGACAATCGACGCCAG
Plgrkt	NM_026362.2	Mouse	TGGAACGTTTTTTGGCATTG	GGCTGGCTTCTTTCGCTTTAG

## Sheet: Next Generation Sequencing
CRISPR-KO Barcoded Primers
Forward Primers
Barcode ID	Barcode Sequence	Primer Sequence
D501	TATAGCCT	AATGATACGGCGACCACCGAGATCTACACTATAGCCTACACTCTTTCCCTACACGACGCTCTTCCGATCTtgtggaaaggacgaaaCACCG
D502	ATAGAGGC	AATGATACGGCGACCACCGAGATCTACACATAGAGGCACACTCTTTCCCTACACGACGCTCTTCCGATCTtgtggaaaggacgaaaCACCG
D503	CCTATCCT	AATGATACGGCGACCACCGAGATCTACACCCTATCCTACACTCTTTCCCTACACGACGCTCTTCCGATCTAtgtggaaaggacgaaaCACCG
D504	GGCTCTGA	AATGATACGGCGACCACCGAGATCTACACGGCTCTGAACACTCTTTCCCTACACGACGCTCTTCCGATCTCCtgtggaaaggacgaaaCACCG
D505	AGGCGAAG	AATGATACGGCGACCACCGAGATCTACACAGGCGAAGACACTCTTTCCCTACACGACGCTCTTCCGATCTTTtgtggaaaggacgaaaCACCG
D506	TAATCTTA	AATGATACGGCGACCACCGAGATCTACACTAATCTTAACACTCTTTCCCTACACGACGCTCTTCCGATCTGCAtgtggaaaggacgaaaCACCG
D507	CAGGACGT	AATGATACGGCGACCACCGAGATCTACACCAGGACGTACACTCTTTCCCTACACGACGCTCTTCCGATCTAACAtgtggaaaggacgaaaCACCG
D508	GTACTGAC	AATGATACGGCGACCACCGAGATCTACACGTACTGACACACTCTTTCCCTACACGACGCTCTTCCGATCTACACAtgtggaaaggacgaaaCACCG
D509	ACTCATAA	AATGATACGGCGACCACCGAGATCTACACTTCGGATGACACTCTTTCCCTACACGACGCTCTTCCGATCTGCtgtggaaaggacgaaaCACCG
D511	GCGCCTCT	AATGATACGGCGACCACCGAGATCTACACGCGCCTCTACACTCTTTCCCTACACGACGCTCTTCCGATCTtgtggaaaggacgaaaCACCG
D512	CGCGGCTA	AATGATACGGCGACCACCGAGATCTACACCGCGGCTAACACTCTTTCCCTACACGACGCTCTTCCGATCTTtgtggaaaggacgaaaCACCG
D513	TTATTCGT	AATGATACGGCGACCACCGAGATCTACACTTATTCGTACACTCTTTCCCTACACGACGCTCTTCCGATCTCGtgtggaaaggacgaaaCACCG
D514	CCTACGAA	AATGATACGGCGACCACCGAGATCTACACCCTACGAAACACTCTTTCCCTACACGACGCTCTTCCGATCTCGAtgtggaaaggacgaaaCACCG
D515	ACTCATAA	AATGATACGGCGACCACCGAGATCTACACACTCATAAACACTCTTTCCCTACACGACGCTCTTCCGATCTtgtggaaaggacgaaaCACCG
Reverse Primers
Barcode ID	Barcode Sequence	Primer Sequence
D701	CGAGTAAT	CAAGCAGAAGACGGCATACGAGATCGAGTAATGTGACTGGAGTTCAGACGTGTGCTCTTCCGATCtaTGCTGtttcCAGCAtagctctTaaac
D702	TCTCCGGA	CAAGCAGAAGACGGCATACGAGATTCTCCGGAGTGACTGGAGTTCAGACGTGTGCTCTTCCGATCtaTGCTGtttcCAGCAtagctctTaaac
D703	AATGAGCG	CAAGCAGAAGACGGCATACGAGATAATGAGCGGTGACTGGAGTTCAGACGTGTGCTCTTCCGATCtaTGCTGtttcCAGCAtagctctTaaac
D704	GGAATCTC	CAAGCAGAAGACGGCATACGAGATGGAATCTCGTGACTGGAGTTCAGACGTGTGCTCTTCCGATCtaTGCTGtttcCAGCAtagctctTaaac
D705	TTCTGAAT	CAAGCAGAAGACGGCATACGAGATTTCTGAATGTGACTGGAGTTCAGACGTGTGCTCTTCCGATCtaTGCTGtttcCAGCAtagctctTaaac
D706	ACGAATTC	CAAGCAGAAGACGGCATACGAGATACGAATTCGTGACTGGAGTTCAGACGTGTGCTCTTCCGATCtaTGCTGtttcCAGCAtagctctTaaac
D707	AGCTTCAG	CAAGCAGAAGACGGCATACGAGATAGCTTCAGGTGACTGGAGTTCAGACGTGTGCTCTTCCGATCtaTGCTGtttcCAGCAtagctctTaaac
D708	GCGCATTA	CAAGCAGAAGACGGCATACGAGATGCGCATTAGTGACTGGAGTTCAGACGTGTGCTCTTCCGATCtaTGCTGtttcCAGCAtagctctTaaac
D709	CATAGCCG	CAAGCAGAAGACGGCATACGAGATCATAGCCGGTGACTGGAGTTCAGACGTGTGCTCTTCCGATCtaTGCTGtttcCAGCAtagctctTaaac
D710	TTCGCGGA	CAAGCAGAAGACGGCATACGAGATTTCGCGGAGTGACTGGAGTTCAGACGTGTGCTCTTCCGATCtaTGCTGtttcCAGCAtagctctTaaac
D711	GCGCGAGA	CAAGCAGAAGACGGCATACGAGATGCGCGAGAGTGACTGGAGTTCAGACGTGTGCTCTTCCGATCtaTGCTGtttcCAGCAtagctctTaaac
D712	CTATCGCT	CAAGCAGAAGACGGCATACGAGATCTATCGCTGTGACTGGAGTTCAGACGTGTGCTCTTCCGATCtaTGCTGtttcCAGCAtagctctTaaac
CRISPR-A Barcoded Primers
Forward Primers
Barcode ID	Barcode Sequence	Primer Sequence
D516	GCGGAGCG	AATGATACGGCGACCACCGAGATCTACACGCGGAGCGACACTCTTTCCCTACACGACGCTCTTCCGATCTtgtggaaaggacgacaCACCG
D517	TACTTACT	AATGATACGGCGACCACCGAGATCTACACTACTTACTACACTCTTTCCCTACACGACGCTCTTCCGATCTtgtggaaaggacgacaCACCG
D518	AGGAAGTC	AATGATACGGCGACCACCGAGATCTACACAGGAAGTCACACTCTTTCCCTACACGACGCTCTTCCGATCTtgtggaaaggacgacaCACCG
Reverse Primers
Barcode ID	Barcode Sequence	Primer Sequence
D701	CGAGTAAT	CAAGCAGAAGACGGCATACGAGATCGAGTAATGTGACTGGAGTTCAGACGTGTGCTCTTCCGATCcctcgtattcgcagcatagctcttaaac
D702	TCTCCGGA	CAAGCAGAAGACGGCATACGAGATTCTCCGGAGTGACTGGAGTTCAGACGTGTGCTCTTCCGATCcctcgtattcgcagcatagctcttaaac
D703	AATGAGCG	CAAGCAGAAGACGGCATACGAGATAATGAGCGGTGACTGGAGTTCAGACGTGTGCTCTTCCGATCcctcgtattcgcagcatagctcttaaac
D704	GGAATCTC	CAAGCAGAAGACGGCATACGAGATGGAATCTCGTGACTGGAGTTCAGACGTGTGCTCTTCCGATCcctcgtattcgcagcatagctcttaaac
D705	TTCTGAAT	CAAGCAGAAGACGGCATACGAGATTTCTGAATGTGACTGGAGTTCAGACGTGTGCTCTTCCGATCcctcgtattcgcagcatagctcttaaac
D706	ACGAATTC	CAAGCAGAAGACGGCATACGAGATACGAATTCGTGACTGGAGTTCAGACGTGTGCTCTTCCGATCcctcgtattcgcagcatagctcttaaac
D707	AGCTTCAG	CAAGCAGAAGACGGCATACGAGATAGCTTCAGGTGACTGGAGTTCAGACGTGTGCTCTTCCGATCcctcgtattcgcagcatagctcttaaac
D708	GCGCATTA	CAAGCAGAAGACGGCATACGAGATGCGCATTAGTGACTGGAGTTCAGACGTGTGCTCTTCCGATCcctcgtattcgcagcatagctcttaaac
D709	CATAGCCG	CAAGCAGAAGACGGCATACGAGATCATAGCCGGTGACTGGAGTTCAGACGTGTGCTCTTCCGATCcctcgtattcgcagcatagctcttaaac
D710	TTCGCGGA	CAAGCAGAAGACGGCATACGAGATTTCGCGGAGTGACTGGAGTTCAGACGTGTGCTCTTCCGATCcctcgtattcgcagcatagctcttaaac
D711	GCGCGAGA	CAAGCAGAAGACGGCATACGAGATGCGCGAGAGTGACTGGAGTTCAGACGTGTGCTCTTCCGATCcctcgtattcgcagcatagctcttaaac
D712	CTATCGCT	CAAGCAGAAGACGGCATACGAGATCTATCGCTGTGACTGGAGTTCAGACGTGTGCTCTTCCGATCcctcgtattcgcagcatagctcttaaac
D716	TAAGCAGT	CAAGCAGAAGACGGCATACGAGATTAAGCAGTGTGACTGGAGTTCAGACGTGTGCTCTTCCGATCcctcgtattcgcagcatagctcttaaac
D717	GAGCTACG	CAAGCAGAAGACGGCATACGAGATGAGCTACGGTGACTGGAGTTCAGACGTGTGCTCTTCCGATCcctcgtattcgcagcatagctcttaaac
D718	AGAGAGGC	CAAGCAGAAGACGGCATACGAGATAGAGAGGCGTGACTGGAGTTCAGACGTGTGCTCTTCCGATCcctcgtattcgcagcatagctcttaaac
D719	CCTACGGC	CAAGCAGAAGACGGCATACGAGATCCTACGGCGTGACTGGAGTTCAGACGTGTGCTCTTCCGATCcctcgtattcgcagcatagctcttaaac
D724	TTAATCGC	CAAGCAGAAGACGGCATACGAGATTTAATCGCGTGACTGGAGTTCAGACGTGTGCTCTTCCGATCcctcgtattcgcagcatagctcttaaac

## Sheet: Validation gRNAs
Target Gene	gRNA Sequence	CRISPR Modality	Within Screen or Independent
Tigre	ACTGCCATAACACCTAACTT	Knockout	-
Tigre	ATAACACCTAACTT	Activation	-
Hipp11	GAACACTAGTGCACTTATCC	Knockout	-
Hipp11	TAGTGCACTTATCC	Activation	-
Fbxw7	TGAGAGCAAGCCAATGGGCAA	Knockout	Within Screen
Fbxw7	TATCCGAAACCTCGTCACAT	Knockout	Independent
Mettl14	GCTGAGAGTGCGGATAGCAT	Knockout	Within Screen
Mettl14	ACATCCGGTCAAGTATGAGT	Knockout	Independent
Csnk1a1	TTAATAGAACCAGTCTGCCG	Knockout	Within Screen
Csnk1a1	TCCAAGGCCGAATTTATCGT	Knockout	Independent
Plgrkt	TGGAGCCGGGAGGT	Activation	Within Screen
Plgrkt	GGCACCGGACTCCG	Activation	Independent
Sox5	CAGCCGATCATAGG	Activation	Within Screen
Sox5	GACTTCTACCATTC	Activation	Independent
Rb1	TTGGGAGAAAGTTTCATCCG	Knockout	-
Rb1	AGAAATCGATACCAGTACCA	Knockout	-
NTC	GATCGGTTATGTTTAGGGTT	Knockout	-
NTC	TTATGTTTAGGGTT	Activation	-
TRE3G	TACGTTCTCTATCACTGATA	Knockout	-
TRE3G	CTCTATCACTGATA	Activation	-
Erbb2	AGGCGTCAGGGAC	Activation	-
Erbb2	GGAATGCAGTTGGA	Activation	-
Erbb2	CTCCCAATCACCG	Activation	-
Erbb2	ACTCCCAGTCTTGC	Activation	-
Erbb2	GCGGCGTGAAGTTG	Activation	-
Erbb2	ACCCAGGCCTGCGC	Activation	-
Erbb2	TGCTCGAGGAAGTG	Activation	-
Erbb2	CGGCTCCCAATCAC	Activation	-
Esr1	TTGCTGTCTGCTGA	Activation	-
Esr1	TGCTGATTCTAGCG	Activation	-

## Sheet: ICE
Target Gene	Target sgRNA	Forward ICE Primer	Reverse ICE Primer
Mettl14	GCTGAGAGTGCGGATAGCAT	CTGTGTTACTGCTTCTGATGCC	ACACTTCACTTCCACCCACTTT
Mettl14	ACATCCGGTCAAGTATGAGT	ATGAGAAAAACAGTCGTCCCAT	AAAGTACAAGCTGGGAGTGAGC
Fbxw7	TGAGAGCAGCCAATGGGCAA	GAGAAGGAAGGAGGAGGAAGAG	CCAATGTTTCCAATGCTCATAA
Fbxw7	TATCCGAAACCTCGTCACAT	TCCTAGGAGTTTGGGGTAGTCA	GGTCTTTTCAGTCTGTTGTCCC
Csnk1a1	TTAATAGAACCAGTCTGCCG	CTCTGTATATCCCTGGCTGTCC	CCTTCTCTCCCCTTACAAAGT
Csnk1a1	TCCAAGGCCGAATTTATCGT	TGTGTTGGCTGGAGCTAGAGTA	ACCCTGACTTTCTATCGGGTTT
