# Supplementary material for: Aneuploidy drives the acquisition of cancer-specific driver genes
Source: Research Square preprint supplement (doi:10.21203/rs.3.rs-4941895/v1), 2024-09-04
Supplement: Supplementary file 5 [file b2f597a3461e3b06a76a9fea.xlsx]

## Sheet: Chr4p_q gRNAs
Mouse Homolog	gRNA Sequences
0610040J01Rik	ACAACTGGTCTACCTCACCA				Total gRNAs	1992
0610040J01Rik	CACTGCCAAGGCCTCCGCAG
0610040J01Rik	GATGTGATCTGCCACTGCCA
0610040J01Rik	GAGTGACTACTTCAAAGAGG
Ablim2	GCTGCCGCTGACATGAGCGC
Ablim2	GTGCTGGCCGGCTTCTCCAG
Ablim2	TTTGCACACGTGACTACCAG
Ablim2	GCCGGTCACACTTACTCCGG
Acox3	TAGGCACTAAGAGGGCCCTT
Acox3	GAGGACGCATTTGTTGGCCA
Acox3	TGAGAAGATCTATAGCCTGG
Acox3	GAGTCATGGGAGTAATACCA
Add1	AGGTGGTGAGGTCACCACTG
Add1	TACCCGGCAGCTCCTCAAGG
Add1	GACCAGAGTGAACTCTGAGC
Add1	CAAGGAGATATAGTAGACCG
Adgra3	AAGCACGACGGTCGGGCCCG
Adgra3	TACTAATAAGGTTGTTCCGG
Adgra3	TGCAGGCCCAGCCTGTCACG
Adgra3	GTTGAGACCGATGAGTCCCA
Adra2c	GATGAGCCACACGGCCACGA
Adra2c	GAAGAAGGAGCCTATGCAGG
Adra2c	GAATGGGCTGGGCAAGGCAG
Adra2c	GTGCCTGGGCCACCTTGCGG
Afap1	GCTGCGCCTGCAGTCATCCA
Afap1	TGCCGGAGATCCCTCAGCCA
Afap1	GAGGACGTTGGTAAAGGCGG
Afap1	GCAAGAAACGCTTTGGCCAG
Anapc4	TTTGGCCAACACTACAGGCG
Anapc4	AAGCTTACACTCCTTCTCTG
Anapc4	AGGCTGAACATCCTTGTCCT
Anapc4	GTGGTCACAGAGGTTTCCAG
Apbb2	TTGACTCTCTTCCAGCCCGG
Apbb2	CAACAGTGACCCAGAAGCCA
Apbb2	CTGGGTAGAGATGGCCGAGG
Apbb2	GGAGCTGCAGGCCAGTGCTT
Arap2	ACAACCAGTACCCTTAGTGA
Arap2	TGTCAAAGACTTTCCAGCTG
Arap2	AAGAGAAATGTCTCTCCGTA
Arap2	TGGACAAACTCTCTCCTCAA
Atp5k	TGAGGATTCACCTTGATGAG
Atp5k	GAGTGGAGAGACCTGAACCG
Atp5k	TGCCATGCCGATGATCAGAG
Atp5k	ACGGATTGAGAGAGAACTGG
Atp8a1	TCGAGATGCCGACCATGCGG
Atp8a1	TGTTTCAGAGAAGACCTCGC
Atp8a1	GAGAATAGAGGAACCTCGGA
Atp8a1	GTGAACAAGAAACAGACACA
Bend4	AGGGCCGTACCTGACGACGG
Bend4	GCCACCTAAGGTGTGCACCG
Bend4	GAGGCCCAGTCCTACCTCGG
Bend4	AACGAGCAAACAGTGGGACG
Bloc1s4	GCTCCCGATCATCCGCACGA
Bloc1s4	GAGGCCAGAGGTGGAGGCGC
Bloc1s4	CAGGCTGGAGGCGTAGCCCG
Bloc1s4	GTCTCGAGAGGTCTCTACCG
Bod1l	GTAAACCACCTCAAGAGCCA
Bod1l	GAATCTTCTGTCATTACCCA
Bod1l	GAAAGATGAGAGACAAGCAA
Bod1l	AGAAGGAGAGATTACATCAG
Bst1	GCGTGGTGTACTCTGCGCAG
Bst1	AAACTGCACAGCCATCTGGG
Bst1	CGTCGCACAGGGCCACGAGG
Bst1	AAGGAGCCTATCCCACGAGA
C1qtnf7	TCTGTGCAAGTGGACAACCT
C1qtnf7	GGAAGGCCAATGCGACCATG
C1qtnf7	AGGAAGGCCAATGCGACCAT
C1qtnf7	GGAGCATTACAACCCTGCAA
Cc2d2a	GATGGTGTGGACACAGAGGC
Cc2d2a	AAACCAAGATACTCACTCCG
Cc2d2a	AAGCCGGTTCTAGAAGCTGA
Cc2d2a	GAGGGACTGCGCAGGCGCCT
Ccdc149	GGACCGAGAGCGACTGGCAG
Ccdc149	GAGGGACCAGTACAAGCTCA
Ccdc149	AGATTAAAGAACTTCGGCAG
Ccdc149	TGAGCAGCTGGAGCGGGCTA
Ccdc96	CGAGGGCAAAGACCGAGCCG
Ccdc96	TGAGGTCCCGGAAAGTCCGG
Ccdc96	AGAGACAGTGAAGAGATCGA
Ccdc96	TGTCCACTCAAACTCTTCAG
Cckar	TTTCCAGCCCGAGTTCACAG
Cckar	GTAGGTGGTAGTCTTGCACA
Cckar	GGTAAAGGAGAGGCACCAGG
Cckar	ATCTCTCTGGAACTCTACCA
Cd38	TCTGGGCTTTCCTAGAGAGG
Cd38	CCAGGGAAAGATGTTCACCC
Cd38	AAGTTTGCAGAAGATGCCTG
Cd38	TGGGTGATGCACGACATCGA
Cfap99	AGTATTCACCTCCTTACAGC
Cfap99	AGGACGTGGAGAAGCAGCTG
Cfap99	GCAGAAGAAGATGCAGGCAC
Cfap99	ATTTGGAAGATCCCAGGCTA
Chrna9	TCCAGTAGAAGATACGGACG
Chrna9	AGATTCTGACAGCCTACCTG
Chrna9	GCACGATGCGTACCTCACGT
Chrna9	AGAGCCGGTGAACACCAACG
Clnk	ACTCACCTTTGGCACTGCTG
Clnk	TTAGAGAAGGAACTTGGCTG
Clnk	GTGGAGACAGAAGCCTTGGG
Clnk	GGTGGACAAGCCTACCTTCA
Clrn2	AGCGACGATGATCAGAAGGA
Clrn2	AGAACTGGTCAAATTCATCG
Clrn2	GGAGCAAGAGAATTGTGACG
Clrn2	AGAGCAGTCAATGGCCCTGG
Cnga1	GATCGTACCAGCCATTGAAA
Cnga1	AATGGCTGGTACGATCACAT
Cnga1	AAAGGCGAGGACCATCACAG
Cnga1	ACTGGACGATGATTATTGCA
Commd8	GCGGCTACAGAAGCTGCCTC
Commd8	AGACACTGTGATAATCCTGG
Commd8	GATCAAGCAGGCCCTGTTGG
Commd8	TAGGAGAAATGAGATCAAGC
Corin	GAACGGTCTTGGCTGCGCGG
Corin	GCAGACAGGAGCGTGGGCGA
Corin	ACCGAGAGCTCCTTCTCCAG
Corin	TCTGCCCTACCACAGCACGT
Cox7b2	CTTCTTCTTCCACTCTTGGG
Cox7b2	TGACACAGATGGGTGTGGAG
Cox7b2	TTATATGACACAGATGGGTG
Cox7b2	GTTTAGTGCATATCTGGCCA
Cpeb2	AAGCCGGTGACAGGCAACGG
Cpeb2	GTAGAGCGAGTGAATTTCGG
Cpeb2	GCAGAGCACGATCCTCTCAA
Cpeb2	GATGGTCACAGTGATCAAGT
Cplx1	GTGATGAAACAAGCCCTGGG
Cplx1	GTTCGTGATGAAACAAGCCC
Cplx1	AGAACGTGAGGTCATGCGGC
Cplx1	AGCAAAGTACGCCAAGATGG
Cpz	GCGGCTGGGACCCTACCGGA
Cpz	GTAGGGCCAGGCCATGTCGA
Cpz	TAGGTGGCAGGCCAGAGGGC
Cpz	TCAGCAGGCGCTGGATGCGA
Crmp1	AGTGACCGGCTCCTCATCAG
Crmp1	GGCCGAATGGTCATTCCCGG
Crmp1	GAAGTCAACAAGCTGGACCC
Crmp1	TGAAGCCTTCACCTTCCTTA
Ctbp1	AAGGGCCTGGTGTAGCCAGG
Ctbp1	GTTCAGGATGTGGCACAGGG
Ctbp1	GATGAGAGAGGAGGCAGCCC
Ctbp1	GGCCAGCATGGACCCTGCTG
Cwh43	CCTGTGGAGAGCAATTGCCC
Cwh43	GTGAGCTCCAGCGTTTGCAG
Cwh43	CAGGGAAGAAGACACACCAA
Cwh43	AATTCGGTCAAGCACAGCTA
Cytl1	GGTGGTGATAGCCTGGCCTC
Cytl1	CAGCATCCGAGAGTAGCAGG
Cytl1	TGGATGTCCAGGTAAAGCCG
Cytl1	GGCCGAAGTGGACACTCTGA
D5Ertd579e	GAACTTGAGGTGCTTTCAGA
D5Ertd579e	GAAGTGTTCTGATCTAACGC
D5Ertd579e	AGAAGGTTCTCCTTCTCCAG
D5Ertd579e	AGGAGCAAAGCTGTTTCCAG
Defb43	GAGGGTCCTGTTCTCCATCC
Defb43	GGTCCTGTTCTCCATCCTGG
Defb43	GAACTATGGATAACAAGGTG
Defb43	ATACGCCGTCAGATACTGCG
Dgkq	GCTCGGGTTGTGGATGGCGG
Dgkq	TTGGTGCAATGCTTGTGCAC
Dgkq	GACCAAGGGAACCAAAGCAG
Dgkq	AATCCTGCTGTCCATCCTGG
Dhx15	GGAGTGCGAGGATGTCCAAG
Dhx15	AATGTGTTGAATGAGCCGAG
Dhx15	GAGTCGCCTGTACACAGCCC
Dhx15	TCACACCATAACGCTCCAGA
Dok7	ACCATGACAGAAGATGACCG
Dok7	GCTGCGCAAGCCATCGCCGG
Dok7	GGAGCGCAGCAGCCTCACCC
Dok7	GGACCAGAATGTCATTGCAG
Drd5	GATGATACACAGATTCAGGA
Drd5	GATGGACAAGGTCCAGGCCA
Drd5	GAGCGACGAGGAGATGGCGT
Drd5	AAACCAGACGAATATGTCGA
Dthd1	ATGCAATCCAGACAACAGCA
Dthd1	TATCTTGCTGTTCTGAGTGA
Dthd1	GCTCACTTGGAAGTCCAGCA
Dthd1	GTGGACATTACTGAATAGGA
Evc2	GAGATGGTGACCCTGGGCCC
Evc2	GATATTTCAAGAGAAGCCCG
Evc2	CCTGGAAATAATACTCAGGA
Evc2	TGTCAGCTACACAGCCTCGC
Evc	CAAGCCACAAGCCAAGGCCT
Evc	ATGACAGGAAACGTCTGCTC
Evc	GTGATGTTGCCACTCAAGGA
Evc	TGTTCATAGCCTCTGGCCGA
Fam114a1	GGAATCAACGCACTCAACCA
Fam114a1	GAGATGCAGAATTGGCACTG
Fam114a1	CCAGATCAGGACCCTGCCAG
Fam114a1	TAAGCGGACCAAGACACTGA
Fam184b	TCCAAAGCCGACGCCCGCGG
Fam184b	AATACGGGAAGCCCACCAGG
Fam184b	TCTCGATGTGCAGCTAAGGG
Fam184b	GATGACATGAAGACTGAGGA
Fam53a	TTTGGATGACCTCACCCGCA
Fam53a	GTTTGGATGACCTCACCCGC
Fam53a	AAGTGGCCATTTGTTCCCTT
Fam53a	GACGGGAGGAGGATGCCAGG
Fbxl5	TGAAGACGTCCACTTCATCG
Fbxl5	GATGCTGAGTCTCTTTGAAA
Fbxl5	ACAGCTGAAAGAGAGATTGG
Fbxl5	GACACGGCAGAGCTCCTCAG
Fgfbp1	CAACCAGAGGAAGACCGCCC
Fgfbp1	GAAAGCAGAGGTCTCCGCAA
Fgfbp1	GGAGCAGGGCATCAGCCTGA
Fgfbp1	CGCACCACACAGCACAGCGG
Fgfr3	CACGCAGAACACTAGCACGC
Fgfr3	AGGATGGCAGCTCAGCTCCA
Fgfr3	GAGGACGTGGCTGAAGACAC
Fgfr3	AGAATGGCAAAGAATTCCGA
Fgfrl1	TGTGCGGCTACAGTGCCCAG
Fgfrl1	CCGAAGAACCACCTGGCCCA
Fgfrl1	AGCCGCACAGAGCTACCCAC
Fgfrl1	ACACCCTGTGAACACAACGG
Fryl	TGGATGGCTCTACTCACCAA
Fryl	TGTTATCCAGATCTCTTCAG
Fryl	ACAGGGTTCGGAGTAAGGAG
Fryl	CCAGGAGGTAATCTCTCTCG
Gabra4	CCGGAGCACAGCGCAATCGC
Gabra4	AAAGGACGAGAAATTGTGCC
Gabra4	CTTTCCCTAGGAATACACTA
Gabra4	ACTCCCAAATTTCAAAGGGC
Gabrb1	ACAAACCATAGCAACCATCA
Gabrb1	ACAGTGGACCGACTGCTCAA
Gabrb1	CCGCATCCCGACGTCCACCG
Gabrb1	ATGATCAGGCTGCATCCTGA
Gabrg1	AAACTTCGTCCAGATATAGG
Gabrg1	TATGCTCAACAGCAACATGG
Gabrg1	GGATGAACATTCCTGTCCAC
Gabrg1	AGGATCAGCTACTTCCACAG
Gak	GACGCCTTACGCCTCACCCT
Gak	GAAGCTCAAGATCTGGGAAG
Gak	GCGATTACTATCCAATGAAG
Gak	AGAGGAGTCGGACACTGGGC
Gm1673	GAACCGCGAACAAGCAGCGC
Gm1673	GGAACCGCGAACAAGCAGCG
Gm1673	GACAGCAAGGACCTGAGCGC
Gm1673	GCTGCATGAATTCAAATGCG
Gnpda2	TATACCTGTTGGTAAGCCCA
Gnpda2	CTAATCGAATACCACAAGAG
Gnpda2	AAGAATGGTAACTTTCAGGG
Gnpda2	GAGATTAAAGACGCTAGCAA
Grk4	TCAGTGCACATGCTGACTGG
Grk4	GTACGAAGTTACCATTGAAG
Grk4	GTGGCTTGGAAGATTTACAG
Grk4	TCTTACCATGATCATCAAGG
Grpel1	ACGACAGTGCCAAAGCCGGG
Grpel1	TGAACGACAGTGCCAAAGCC
Grpel1	AATGACCCAAGTCCTCGTCC
Grpel1	AAGCCAGAAGCTGGTAGAGG
Grxcr1	TATGAAGATGGACAAGCACC
Grxcr1	AAACGGCCACATTGGATCAG
Grxcr1	AGGTCGTCCTCACCACACGA
Grxcr1	CATCAATGAAGACAACAGGA
Guf1	GAAGAGCCTGCAGGCGGCCC
Guf1	AGAAAGAGGAATCACTGTGA
Guf1	AGGTCACTGTCTGCATGCCA
Guf1	GGGTATTCAAGCTCAAACTG
Haus3	TAGGGAGCGACGACTGGAGA
Haus3	TATCCTAGAAGGAACAGCAT
Haus3	GGATAGGCTTGCCTGATCGC
Haus3	CATCTGAGCAGTTAACCTCA
Hgfac	AGCAGGAAGGGACATGGCCT
Hgfac	AGAGATCACAGGGATCGTGG
Hgfac	GCAGCATGCGGCCACCGTAG
Hgfac	TATGACCGAGACCGGGCCTG
Hmx1	GGGCGCTCAACCCAGGGCGA
Hmx1	ACCTCCGCAGCCGAGCGCGA
Hmx1	GCTGCGGAGGTACAACGCGG
Hmx1	GTTGGCCGAGGCTCCAGCGG
Hs3st1	AAGGTGGTTGTACAACACCT
Hs3st1	ATAGGCGGGTGTCTTCTCCA
Hs3st1	TGGGAGGAGCATTACAGCCA
Hs3st1	GGAGAAGGCACAGCATCCAA
Htra3	ACACCAGGCAGCAGTTGCAG
Htra3	ATGAAGTTGAACTTGTACCG
Htra3	AAGCCCGAGCCACTGGACAG
Htra3	TGGGTCACTCAGCAGACCTG
Htt	TCTGCCGGACCTGGCAGCGG
Htt	ATTCACACGGTCTTTCTTGG
Htt	GAAACTCTTGGGCATCGCTA
Htt	TAGAGTTCTAACTGTAGCCT
Idua	ATAGCTGAGGAGGGACGCGG
Idua	TTGTACATAAGTCCCTGCCC
Idua	AAGTCCGTGAAGTACCCAGA
Idua	TGGACACGTTGTCAAAGTCA
Jakmip1	ACGCTGAATGTGCTGCGCGA
Jakmip1	GATGGACGAGATCAAAGGGA
Jakmip1	AGAGGACAGGAACACCCTGC
Jakmip1	GAAGCTCAAGAGCCTCACGA
Kcnip4	GAGCTTCAGATTCTTTACAG
Kcnip4	CAGGCATCGGCCTGAAGCCC
Kcnip4	TTACTCACAGTTCTTTCCAC
Kcnip4	CTTCATTAACAACACCACTG
Kctd8	TGGGCGCATAGCCTTGGCCA
Kctd8	CTGGAGGACAACGTTTCCCA
Kctd8	GAAAGAACTCTGCTTCGCGC
Kctd8	CCAGGAAAGCACCTGTTCAG
Klb	GTTCCATTGGGAAACAACCG
Klb	TATAAAGACAGAGGACACCA
Klb	AGGCCGTATAACCAAACACG
Klb	TGGGTGGTACAACGTCACCA
Klf3	GGCCATGGACCCTGTCTCGG
Klf3	GGCCAGGTGACGCTCTCCGG
Klf3	CTTGCAACAAGGCTTGCGGG
Klf3	TGGGAAGAGACCTCTACCTG
Klhl5	GAGAGACCAGAAGTGGACGA
Klhl5	GAGAACAGTCACCTGTGAGC
Klhl5	AGCAGCGAAATAATCTGAGA
Klhl5	AGTGGCTCACAATTACACGA
Lap3	AGAGACCTCTCACTCCCAGG
Lap3	TCTGGACCTCCTCTCAAAGC
Lap3	AAGGCCGACCACCACCACGC
Lap3	TCGGTGGAGGTGGATCCCTG
Lcorl	ACAGAGGAGCTATCATCTCA
Lcorl	TTCACAGTCAACGCCAACAG
Lcorl	ATGTTAGGATCACAGTTCTG
Lcorl	AATGGAAGAGGCCATTGCAA
Ldb2	GAGACTGCAGTCTCGTACAG
Ldb2	TGGCAAACGCATCCCACCAG
Ldb2	TGGGAAGCCCATGTTTACCA
Ldb2	ATTTCATCAGTCTTACCCTG
Letm1	TCAGCTGTACCAGGACCCTG
Letm1	GAGCTGAGGCACTACTACCA
Letm1	AGGCAGCAGGAATTCCATGA
Letm1	GTTTCTCCAGGACACCATAG
Lgi2	GATACACAGCACATCAGAGA
Lgi2	AATGTGACTGCAAAGCCAAA
Lgi2	CCAGGCTCTTCCTTCCCGGG
Lgi2	GCTGTTCCACTTGTAAACTG
Lias	TGGGATACAGCTCGCAGCCT
Lias	TAAAGCGCCAGAAAGGAGAA
Lias	GGTATCTTTGTCTTTAGCCA
Lias	AGGTTGCCTTACCATGATCG
Limch1	TCCGGAGCCTGCCTTCGCCG
Limch1	TAGGCATTACTTACTCGCAA
Limch1	GATACTCACCAATCCTGCAA
Limch1	ACAGCCTCTCAAGAATAAGA
Lrpap1	GCAACAACAGCACTAGCAGT
Lrpap1	GTGGAAGGCTTGGATAAGGA
Lrpap1	TGGGAGGAAGGACGCCCAGA
Lrpap1	AGACTGCGCAGTATCAACCA
Lyar	TATGAAGCCAAGACACACAA
Lyar	GTGGAGTTGACTCACACTGC
Lyar	GAAGCGCAAGAAGAACCAGG
Lyar	GGGAGAGGCCAAGGACCACG
Maea	GCAGGAGTACCCGACCCTCA
Maea	AGAGACTAGCCACGTCACCA
Maea	AGTAGAGTCCATCCAGGCCG
Maea	AAGTGGAGGAGTCCTTGGAG
Man2b2	AGTAGCGGCAGCCAGCGCAG
Man2b2	GCAGCGGCGCTTCATCGCCG
Man2b2	GTAAGATCTGGTCATCCAGG
Man2b2	ATGGGCATTGAAGCCTGCCA
Med28	ACATGGCGGCGTCCCTGGGA
Med28	GCAGAAGCGACGCCTGGCCT
Med28	GATCAGGAAGAAATTCGAAC
Med28	ACTGCAGCGGAAGGATGCGC
Mfsd10	GGAGGTCGAGTAGCAGGCCG
Mfsd10	TACAACAGTGTCCTGTTCGG
Mfsd10	TGCGGAGAAGAACTGCAGGA
Mfsd10	GAAGGCCTTAAAGCTCCGAG
Msantd1	TCAGACGGAGAAGCATCGGA
Msantd1	GCAGACCAAGCGCAATGCCA
Msantd1	AGATAGCGAGTCCATCCCGC
Msantd1	TGTGAGGGCAAACTGCCGGA
Msx1	GGCCGATCACAGGAAGCCCG
Msx1	TGTGCCCATGGCGGTTGCGG
Msx1	AGAAGTCATAGCAGCAGCCG
Msx1	ATGGGCGGTGTAGAGTCCCA
Mxd4	TACCTGGAGCGTAGGGACCG
Mxd4	GCCGTCGAAGGGCAGCACGG
Mxd4	GACGTGTGCTGTCAGGGCCC
Mxd4	ACTGGAGGAGCAGGACCGCA
N4bp2	TCAGACCCTGAATTGTGCAG
N4bp2	TTGCAAGAGGATAACCCAGG
N4bp2	TAATACAAACCTCCAAGCGT
N4bp2	GTGGTGGAAGTTCAAGCCGA
Nat8l	AGGACCATGAGGCACTGCCG
Nat8l	GGACCATGAGGCACTGCCGG
Nat8l	GCGCTACTACTACAGCCGCA
Nat8l	GAATTCCAGAACTCACCAGG
Ncapg	GCTGAGCCGCACGTACGGCG
Ncapg	GAAGTCCATGACCCTCTCCA
Ncapg	TTCTCGACTCCAAGATCCCA
Ncapg	AGAGTGCTGCTGCTTCAACA
Nelfa	GATGTTATCGATGACCGCGG
Nelfa	TCTGATGGATATCATCCAGC
Nelfa	AACCTAAGAGTGCCACGCTG
Nelfa	GCAGCTGAAGAGAAGTGCTG
Nfxl1	GCTGGAGGAGGGCGAGCCAA
Nfxl1	ACAACATACACTACTCACAC
Nfxl1	GAATGAGGCTTTCCAAGCAG
Nfxl1	AGAAAGATTATCCCTGGCCA
Nipal1	TCATGGCAGGGCTCTCCGGG
Nipal1	TGTGATCTCGCACGAAGCCC
Nipal1	TAAGAATGTCCACCTTGCCC
Nipal1	GACCAAGGTGGCAGGCGCAA
Nkx1-1	CAGGGCCCAGTAGCACGCAG
Nkx1-1	GGCCAGCGACACTGTTCCCG
Nkx1-1	AGCGGTGGCACTCCAGCCCG
Nkx1-1	GGACGAGGAAGAAGCGCCCG
Nkx3-2	GCCCTGAGCGAAGAGAACGA
Nkx3-2	GATCCGCCAGCAGCAGACGG
Nkx3-2	AACAAGAAAGAGGAGCGCGG
Nkx3-2	TACGGCCACTTTCTTGGCGG
Nop14	GGTCCACAAAGCGCCCGCAG
Nop14	TAATAGCAACATAAGCCCAG
Nop14	ACAGTGATACTGAAGACCGG
Nop14	ATGGAGACAAGCCAAAGACA
Nsg1	TCGAAGCCATCCTCCAGCAG
Nsg1	AAGCAGCCACTGCTGGAGGA
Nsg1	TTCACCGTCAGCATCACCGA
Nsg1	CCAGGAAGACGACACAGGTG
Nsun7	TCCTCGGAGCGGGAGGAGGA
Nsun7	GCACTGGAATATCAAAGCTC
Nsun7	AGTGAAAGACGTTCTGGCCA
Nsun7	CCATCCAGGGCTCCTCACCA
Nwd2	TACCAGAGAACGCCGCCCGC
Nwd2	TTATAGATACAGGAGCGGAA
Nwd2	CAGGTCATAGATCTGTACTG
Nwd2	ATGGGAACATTCGAATCCCT
Ociad1	TACAGGAACTATGAATGGGA
Ociad1	AGGCGGTTATATTCCGACAG
Ociad1	TCTGCCTATAGCTGTGCCGT
Ociad1	TGCGGCGCTCTTCTCCACCA
Ociad2	GTTCCCATGAGTGGACACTG
Ociad2	TCTTGGCAATCTCTCCTCTG
Ociad2	ATAAGCATGCTTGTCACCCA
Ociad2	CAGGACCAAAGCCAGCACCA
Pacrgl	ATGCAGAGATCAGAGTGCTC
Pacrgl	TTGAGCTTATCACTTGGCCG
Pacrgl	GCAGCTATTTACTCTCAGGG
Pacrgl	CAAATGGAAGAATTTCAGGC
Pcdh7	GCTCTGGAGGCTCCAAGCGG
Pcdh7	GGACACCTGAACCAGGGCGA
Pcdh7	ACGGTCGGACACCTGAACCA
Pcdh7	TCCAGAGAACAACATTCCCG
Pcgf3	TGACCAGGAAGATTAAACTC
Pcgf3	GTTTCAACTCACCTTCCTGG
Pcgf3	TAGCGGAAATGAGGAAACAG
Pcgf3	GATGGCTACCTCATTAAAGG
Pde6b	GTTCAGCTATGCCATTGCGC
Pde6b	TCGGCGAATGAGCTGAAGTG
Pde6b	AAACTGCGAACGGTATTCAG
Pde6b	TCAGGCCCACGAACACCTGA
Pds5a	ACGTTTGATCATTTCATCGG
Pds5a	GAAGGCGCACATCTTTATTA
Pds5a	AGGGATGAGGTTGATAAGAA
Pds5a	GATCAAATACGTGTTCAGAC
Pgm2	GTGGCCTCCTGCCTCAGCGC
Pgm2	GATGATGCAAGATACGGCAG
Pgm2	GGGAAAGCAGCAGTTTGACT
Pgm2	GGAGATTGTGGACTCAGTGG
Phox2b	GAGCTAGCGGTCCTTACCTG
Phox2b	CATACAGGACTCGTAGGCAG
Phox2b	TCAACGAGAAACGCAAGCAG
Phox2b	AAACTCTTCACCGACCACGG
Pi4k2b	GCGGGTCCGATCCAGCTCGG
Pi4k2b	GCTGCCTGCTTCCTAACCAG
Pi4k2b	TCGGATAGGACTTCCTCCTA
Pi4k2b	AGGAGGCTGAGTATTGGCTT
Pigg	GCAGCTGGCAGCGAAGGCCC
Pigg	GATTCGAGGCATAGTAACTG
Pigg	TTGATGACAGGAAGTCTCCC
Pigg	TGAGCTTGTGACCAATCAGG
Poln	TCTTCTGAGCAACAGCAGAG
Poln	CATGAGGAGACTCAATCACT
Poln	GTACATCAATGTCACCACCA
Poln	ACTCTGACTCTCCCAGCCCA
Ppargc1a	GATACAGACAGCTTTCTGGG
Ppargc1a	GAATGAGGCAAACTTGCTAG
Ppargc1a	TTGCATGCGCACCTTAACAA
Ppargc1a	TACTTGAGAAGCTCTGAGCA
Ppp2r2c	AAATTAACCACAGCTTCCTG
Ppp2r2c	AGTGTGGTTGAACTCGACAG
Ppp2r2c	AAGAACGCACCTCACAGCCA
Ppp2r2c	CGAACGAGACAAGAGGCCCG
Prom1	CTAGAGGGAAGTCATTCGGC
Prom1	TGAGCAGACAAATCACCAGG
Prom1	ACTCCTGACTGAAACACCAA
Prom1	GTACACCAACACCAAGAACA
Psapl1	GCAGGGCAGGGACTTGACTG
Psapl1	TAGCAGGGACAAACTGCCGG
Psapl1	GTGAGAGAGAGTCTGCCCAC
Psapl1	AACCACACCATCCCTGCCGG
Qdpr	CAGGATGGCGGCTTCAGGCG
Qdpr	TGTCATCTTAACAACCACGC
Qdpr	GTGGCTGGAGGATGGGCCGG
Qdpr	GCCACAAAGCACCTGAAGGA
Rab28	CACCATGTCAGACTCTGAGG
Rab28	GTACAAGCAGACGATAGGAC
Rab28	TTGCCCACTAAAGCAACCAG
Rab28	AAAGTTGCAGCAGAAATCCT
Rbm47	GATCCTGGAGGAGATCGCCA
Rbm47	ACATCACGAAGGCATAGCCG
Rbm47	CAGGCAGCATAAGAGGCCGA
Rbm47	GGTGGCGGTGTGGATACCGC
Rbpj	TACCTAGTGAGTCGTTTGGG
Rbpj	TACTAACTGTCTGGGACCGA
Rbpj	GAGGAGTTCACAGTTAGAGA
Rbpj	AAATTGCAGTTGAATGGCGG
Rell1	AGGACCAAAGCACTCACCGG
Rell1	ATTCCGGGTGTCCATTCCCA
Rell1	AATGAGAACAGTGACACGGT
Rell1	ATGGTAGCTGATAACAGCGT
Rfc1	AAGAGGATCATCAATGACTC
Rfc1	AAATAGTCGAGCACTGACGT
Rfc1	GCAGCTGGATGAAGATGCAG
Rfc1	GGCCCGAAAGGATTCTGAAG
Rgs12	ACACAGACTCTACTGACGGG
Rgs12	GAATCTCCTAGATCTTCCAA
Rgs12	GAACACCAACAGGATCCTGA
Rgs12	AACATGACTGAAGCACTCAC
Rhoh	GGTGAAGCGCACCAACAGTG
Rhoh	CACCTCTGAGACCTTCCCGG
Rhoh	GAGCAACCTACCCTGTACCC
Rhoh	TGTGGCCACAACCAGCACCG
Rnf4	AATCCTCAAAGAAAGCGGCG
Rnf4	CCTCAAAGAAAGCGGCGTGG
Rnf4	GCTCTAAAGATTCACAGGTG
Rnf4	ATGATGGAGCTACTGGACCC
Sel1l3	GCAGAGAAAGAGCAATGCGC
Sel1l3	CGTGACCTACCACTTTCCAG
Sel1l3	GGCCACTCGAAGCCAGCGCG
Sel1l3	TTAGGGTCACCATTTCACTG
Sepsecs	GAACCCGGAGAGCTTCGCGG
Sepsecs	TCGTCGAGCAACCAAAGCAG
Sepsecs	CACCGGATCGTCCAATTCCG
Sepsecs	AGTGACCATGGACTTAAAGC
Sh3bp2	AATTTGCTGACCATGCCTGG
Sh3bp2	TGTGGATGATCACAAAGCGG
Sh3bp2	TGGGAAGACATTGTTGGACG
Sh3bp2	GGAAGCAAGGATGTTTCCGG
Sh3tc1	GGAGAGAACAGGGTCTGCGG
Sh3tc1	ACTGTCATTTGACTGGGAGG
Sh3tc1	TGAGGCGGAAGAGTGGACTG
Sh3tc1	ACTGTGGATAGACAGCAGCC
Shisa3	CGCGCAGGGCAACTATCACG
Shisa3	GCGCAGGGCAACTATCACGA
Shisa3	CAGGACGCCACCATCTGCTG
Shisa3	CCACGGGAGGATCTGTGCGG
Slain2	GGACGCCACCTCCTTGCTGG
Slain2	GGACTGACAGATTTCTGCAT
Slain2	GCCAGTAGCCCATACAGCAG
Slain2	TCACTATCTATAGAGGACTG
Slbp	TATGGGAGTCGCCGCGACGG
Slbp	GGAAGGCGAGCTCCAGACTG
Slbp	TGTAGCTTTACAACTCCTGA
Slbp	AGAGGAAGTCATCATCGGGA
Slc10a4	GAGGTTGTCAGGCAGCAGCG
Slc10a4	TGGGACACGCCGCTCAACCA
Slc10a4	CCACAAACACATTCAGCCCG
Slc10a4	GCTGGGTCTAGGCTGTACCG
Slc26a1	AAGGGCAGTGGCAACCCGAA
Slc26a1	AAGGGTCAAAGCCAGCCAAC
Slc26a1	AGATGCCCACATTAACATGG
Slc26a1	CAGCCAGCAGCTCCTCACGG
Slc2a9	TCCCTGATGTGTGACACCGG
Slc2a9	CTACGGGTACAACCTCTCCG
Slc2a9	GCATGGACAGCCCATTGACC
Slc2a9	GCATGCCATCAGCAACGCTG
Slc30a9	CCAGCTGCACCTGTGCGCCG
Slc30a9	TCTACGAATGTCCAGAAAGG
Slc30a9	AAAGGACTCGGTGTCATCGT
Slc30a9	ACTGAGACCGCTCTGGAACG
Slc34a2	TATGCTCGATTGTGGTCCAG
Slc34a2	TCTCATAGAGGAGCATCCCG
Slc34a2	AATGCAGAGCGTCTTCCCTT
Slc34a2	AACCATGCTGACGATGATGG
Slit2	GCAGACACTGTCCCTATCGC
Slit2	ACAGAATCAGCACCATCGAG
Slit2	GCAGCTCAGGAAACAACTGA
Slit2	TTCCAAGGAAGGCTTTCCGT
Smim14	GCTGGTACTTACACTCCCGA
Smim14	GACTGGAGGGCTTTCCAGGG
Smim14	GCTGATGCCACTGTCACTGG
Smim14	CAGGACGTTAGTCCACGGGA
Sod3	ACTGAAATAGGCCTCAAGCC
Sod3	CGGGCCGCACTACAACCCGA
Sod3	TGTCTGGCTCTCCCAGGCGG
Sod3	CAAAGGAGCGCAAGAAGCGG
Sorcs2	CACGAACGTGGCCAGCACGG
Sorcs2	AAAGTACTACCATGCAGACA
Sorcs2	TGACAGTGGTGACACCAGGC
Sorcs2	GATGCTCCTCTTCCACCCGA
Spon2	GTGATGCTGTATCTAGCCAG
Spon2	GATCTCCTTCATCAGTGCCC
Spon2	AGGCCGCTGGAAGGAGCAGG
Spon2	GCGGCTACAGCAGAGTCCCA
Stim2	TTGGTGGCCGGCGTGGCGGA
Stim2	ATGGACGACGACAAGGACGG
Stim2	TTGAGGATTTGTGGAAACAG
Stim2	CACTTGAGGATACCCTGCAG
Stk32b	AGTAGCGGCGGAATATGGGC
Stk32b	AGTCACCTCCCACTCACCAT
Stk32b	GCAGAATGTGCACTTCACAG
Stk32b	ACTCACCATGCTCATCCAGT
Stx18	GTTGCGGGTCGCTATGGCGG
Stx18	AGAGCGAGACCAGATAGACC
Stx18	GATACATTCCCAGCAAGTGA
Stx18	CATCCGAGTGAAGCGCGTGG
Tacc3	GATCTGCCGGTAAGTTCTGG
Tacc3	TGACGTTCCAGACACCACCT
Tacc3	CCAGCACTGGCTCAACAGGA
Tacc3	CAGCAAAGGCTCGATAGGAG
Tada2b	GCCGAAGCCGAACTGCTCGA
Tada2b	GTGGTGGCCGATCTCCGCGC
Tada2b	GAAGCGCAGCGGGCTCACCT
Tada2b	TCTTTGTAATGCCATTGCGC
Tapt1	GCTTCTACGAGAGCGACCGG
Tapt1	TCAGTGCTGAACTGACAAGA
Tapt1	CAGGGTGAACACATACAGAA
Tapt1	GTGCGGGCTGAAGCAGACGT
Tbc1d14	GGAGCTGAGGGTGTGCACGA
Tbc1d14	AGATTCAAAGAAGACCCAGA
Tbc1d14	GTCCTCGAGGATGAGCGCCG
Tbc1d14	GTGCTGCAGGCCAAGAAACG
Tbc1d19	TCAGCTGGAACGGCAGGCCT
Tbc1d19	GGTGTACATGAGGAAAGCAC
Tbc1d19	CATGGGAAATACTCACCAGG
Tbc1d19	GCTCAGCAGTACATCCGACA
Tbc1d1	AGGCTCGCACCGCAGTCCGG
Tbc1d1	ATAGAGAACCACCTCATCGG
Tbc1d1	GAGTGCTCGGGTGGCGGCAG
Tbc1d1	GCAGGCTTTCACGGTAGCTG
Tlr1	AAGCTGGTTAACCAGGCAGA
Tlr1	TTGGTAGGGATGGAGTACTG
Tlr1	AATTCTCTAAGGTACAGCGA
Tlr1	GCGTATGCCAAACTATCTGG
Tlr6	ATATGACAGGACATGCGCCT
Tlr6	TGTCTGCAATCTCTTTAAGG
Tlr6	AAAGACCAAATGGAGAACGG
Tlr6	TGTTGCAGAGGCTATCCCAG
Tmem128	GCGCCAAGATGGACGCTCCG
Tmem128	GGGCTCGGGAGCAGCTACGG
Tmem128	TGATGTCAAATACCCAACAC
Tmem128	ACTGCAACTTTCATTGCGGC
Tmem129	GACCAGGTAGGCCAACGTGA
Tmem129	TGGCGGGATGGACAGCCCTG
Tmem129	TATCAAAGGGCTGTGTGCCA
Tmem129	GTGGTCATCCGCCAGAGCCT
Tmem156	GGATTCACAAACCAAACACA
Tmem156	AGCTTCGCTGAGATTTGCCG
Tmem156	AGGGTCAGCTATAAGAGCGG
Tmem156	GCCATCTCCGCACTTTCCTG
Tmem175	GAGCAGGCAGTGGATTCCGA
Tmem175	GAGGGTGATAGTCATCATAC
Tmem175	CACATAGGGATCTATCCCGG
Tmem175	ACATCAGCAAGGCTACCACC
Tmem33	CATTGGCCAGCAAAGCACGC
Tmem33	CTGATGCAGCCTCAGAGCGC
Tmem33	GTGGCAGCTGTCCTCTAACA
Tmem33	TCCAAGAATGATCTCAACAG
Tnip2	TGTGCCCTTCCAGAGCCGCG
Tnip2	GTACAGGCCACAGAGCGCTG
Tnip2	GCGGCACAGAACATCACTGG
Tnip2	GATGTCCCGGGACACTGCGC
Trmt44	GGGACCGCAAAGTTCTCCCG
Trmt44	CTCCATCTCCATCACAACGA
Trmt44	ATAGCGCAGGATAGACACCA
Trmt44	TACCAGCAGATACGTAGCAA
Txk	GCCGTGGTTCGCCAAACTGA
Txk	TTTGGCACTGAAGAGAGCGG
Txk	TGAGAGATTCGAGACACTTG
Txk	GGTGATACTGGATCAACTCG
Ube2k	CAGAGACATGGCCAACATCG
Ube2k	AATCAAGCGGGAGTTCAAGG
Ube2k	AGGTTTACAATACCTTAGGG
Ube2k	GATTCGCTACTACTGCATCT
Uchl1	GAAGATGCAGCTGAAGCCGA
Uchl1	GGAGCAGCAGGGCGCAGGCA
Uchl1	CACTGCGTGGATCAACCCGA
Uchl1	AGACAGAAACTGTTTCAGGA
Ugdh	ATTGGTGCGGGCTATGTCGG
Ugdh	GAAGTAGTCGAATCCTGTCG
Ugdh	TGTTGGCATCAAATATGCGG
Ugdh	GACCAGCTTGGAAAGCTCCG
Uvssa	CTGATCACACAGCTGACCCA
Uvssa	AAAGTGCAGACCGGGCTAAG
Uvssa	GGGTTCCCACAAGTACACGC
Uvssa	TGAGCGAGTCCCGAGCAGCA
Wdr19	GAAGTGAAATTAGCTTGCCT
Wdr19	GGAAGGCGACACAATAAGAC
Wdr19	GCTTGGCTCTGATTTCACTG
Wdr19	GAATGAACCAGATAACCCGG
Wdr1	GTAGAGGAAATGATCGCCCT
Wdr1	GTAGCCAAGTATGCACCCAG
Wdr1	AGACAGTAAGAGGATCGCCG
Wdr1	GTGAACTTGAACTTGAATGG
Wfs1	TGAGGTCTGGGAGCACGAGG
Wfs1	AGGCCGTGAAGCTGCTGAGG
Wfs1	GTTGGACAGGTCAACGAGCA
Wfs1	GCAGAAGCAGAGGCGCATGC
Yipf7	AAACCCAGAACAGTATGACA
Yipf7	GATGGCAGGAACATCTCTGG
Yipf7	ATGAATGAAACGGATCTCAC
Yipf7	TCAGTAAGGCGTGAATCCCA
Zar1	AGGCAGGCAGACACCCACGA
Zar1	TCCGCAGGCCACCAAAGCCG
Zar1	ACACATAGGCGCTCTCCCAC
Zar1	ATCCTACAACCCTTACAGAG
Zbtb49	TCACCTGAAATACTGGCTGA
Zbtb49	GGACGACTGAAATTTGCCGA
Zbtb49	TGGGAAACACTTCTCTCAGG
Zbtb49	GCCGGCGTAAGTGAGTCTGA
Zcchc4	GGGAAGCGCCACCTCTACCC
Zcchc4	ACAGAACTTTCTTTGAGCCA
Zcchc4	ATGGTGACAGACCCTCCCTT
Zcchc4	AATCCAGCATGCAGAAGCTC
Zfp518b	TAACTGGAGAAGATAAACCG
Zfp518b	GCAGAAGGAAGGGCTCGAGG
Zfp518b	GGAGAGAGAACCGAGACAGC
Zfp518b	GCTGGGTAGGCACTGCTCGA
Zfyve28	AAAGTGGCTGTACAAACCCA
Zfyve28	ACAAGCAGTGTGCACCTCTG
Zfyve28	ACTTGACGCAGAAATCCCGA
Zfyve28	TTACACAGAGAAGATGCGGG
Gabra2	ATTCTAGACAGACTTCTGGA
Gabra2	GCTTCAGCTGGCTTGTTCTC
Gabra2	TTGGAAATGGTAGAGAGGAC
Gabra2	GGTAGAGAGGACAGGATCTT
Mrfap1	AAACTGCTCGAAGTCCTCCT
Mrfap1	AACTGCTCGAAGTCCTCCTC
Mrfap1	TGCTGGTGCAGCTCGTGCGG
Mrfap1	GTTGAGGGCGCTCTCCTCGG
Rpl9-ps1	TACATCGCAGGGTTCAGATG
Rpl9-ps1	TCTCCTGGATAAGACGTTGA
Rpl9-ps1	TCCTGGATAAGACGTTGATG
Rpl9-ps1	TCCTGGATAAGACGTTGATG
Smim20	TTCTCTCCATGGCAGCGGCC
Smim20	TGTGGTCTGATCCATTTGGC
Smim20	GCCTCCGGCTGCCATCGTGG
Smim20	GGTGGAGGCCGAGACACTGG
1110002E22Rik	GATGAGGCAGTGGTGAGCGC
1110002E22Rik	AAAGCCCAGGATGAACCCAG
1110002E22Rik	GGGAGGCTGAAGCTCCGCAA
1110002E22Rik	GGTGGCTGTGATCAGACCCA
1700016H13Rik	TGGCGTATGGCTTGCCAAGA
1700016H13Rik	TGATCATTTGTCATGGCGTA
1700016H13Rik	AGGTCTTTGTGAGTTCCGCA
1700016H13Rik	TTTGCCTCAGACAGGAGCCA
1700029J07Rik	TGAGATGGAATACATCACTG
1700029J07Rik	AAATAGACAGATCCTACCGG
1700029J07Rik	AGGACAAGTATCAGCCACCG
1700029J07Rik	AGCTATGCCAATGTTACCAT
1810037I17Rik	CCGACGGTGTCCGGGAACGG
1810037I17Rik	GCTCGTTCGAAGCTGGAAGG
1810037I17Rik	AAGATGAGGCACCTCAGTCC
1810037I17Rik	TCCGAAACACTCCTACTGGC
4930579F01Rik	TGGTTACGGCATGGCTCCCG
4930579F01Rik	ACCAGTTTAGCCCTTCCGAG
4930579F01Rik	GACTTCCAAAGACAATCCCT
4930579F01Rik	GCAGAGCACATCCTTGCAGA
4930579G24Rik	AAACTCCTCAGAGTCAGCCA
4930579G24Rik	GACGACGGAGATGAGGGAGG
4930579G24Rik	GACGAAGAGGCGCCTGACGA
4930579G24Rik	ACTTCTGGAAGCCACGTCTG
Aadat	GCAGAGACATGAATTACTCA
Aadat	TAAGTCAGCTGCCTTCACTG
Aadat	ATTGGGTGGGTAGTTGACAG
Aadat	GAAACAGTGGTTCATTGACC
Abce1	ACTTACCCATCCGAACCACA
Abce1	AATGTCGAAGATCTTTCAGG
Abce1	GGAAGGCTTAAACCAGATGA
Abce1	TAGGTACAGACATTGTCTGG
Abcg2	GCGACATTGGTACTAACACG
Abcg2	ATTCTGGGACCCACAGGCGG
Abcg2	GCAGCAAGGAAAGATCCAAA
Abcg2	GTCGGAACTCAGTTTATCCG
Acsl1	AGGCCTGGTGGCATACCAGA
Acsl1	GATGTCAGAACCATGTACGA
Acsl1	AGGAAATCCACTCATAGGGC
Acsl1	AGGCTCCGGGCTGATCCAGA
Adad1	GAGGGCGCGAAGGACAGCGT
Adad1	CAGACAGTAACTTTGCCCAC
Adad1	CCAGAGCCATTGCTTTCCAA
Adad1	TATTCAGTACAAGACAGGAC
Adam29	TAGGTCCCTGAAGACCACAA
Adam29	GTAGAAGATGGAATTCCCTG
Adam29	TAAGTGATGAGCCACTCCAA
Adam29	GAGCCACTCCAATGGCACGA
Adh1	GACAGACGGCATGAGCACTG
Adh1	TCACAAACCCTTCACCATCG
Adh1	GTCTGAGCGGCAGACACCAG
Adh1	AGTGGAATGACTTTATCACC
Adh4	GAACCTCACAAGCTTTAGGA
Adh4	ATTGTAGAAAGTGTTGGGCC
Adh4	TCATGGAAGACAGAACCAGC
Adh4	GACAGCACAAGTGGAACTGG
Adh5	TAAGGCTGCAGTCGCCTGGG
Adh5	TCAGGGTATAGGCATCGGTG
Adh5	AGAAGGCAGACTTTATCCAA
Adh5	AAGACGGCACAAGTAGAACC
Adh7	AGTGCAAAGCGGCTGTCCTA
Adh7	ATCTGTGCGACAGATTCCTG
Adh7	CAACGCCTGCCTGAACCCAG
Adh7	AACAGCAGCTCCATAACCCG
Aff1	CAGGCTCCACCACTCTCTCG
Aff1	GAAGGAGGCATTTCCCGAGA
Aff1	GGTGGTAGACATGTGTGCGG
Aff1	TTGCGTTGAAGAGATTCTGA
Aga	AGGCCAAGTGTTGACGACCA
Aga	GTTGGAATTTAACAGCGTGG
Aga	TACCAATAGTATCATGGCTG
Aga	AAGACGGGACATACTGCTGC
Aimp1	CTGGCAGAAATTCATAACGG
Aimp1	GCAGTACAGTTCGTCTGCAG
Aimp1	CATACAGTGAATCTGCATCA
Aimp1	CCAGGAACGGACCCGTTGGG
Alpk1	AACGCCAGATGTGTCTACAG
Alpk1	CAAACAAGCCATGAGCCCAG
Alpk1	CATCAAGAAGACAATAGCGG
Alpk1	TCGGTCTGCATACAGATCAG
Anapc10	AGGAGGTGTCTTGTTCGGTG
Anapc10	TGCTTAGGATCAGCACCAGG
Anapc10	GGAACGTGAATCCAGCCACT
Anapc10	GTTCTAGCCAATCATCAGAA
Ankrd37	GTGAGCAGGCGACTGCTCCT
Ankrd37	TGAGCAGGCGACTGCTCCTG
Ankrd37	GGACTGCCTGAGCCTCCTTG
Ankrd37	GAAGCGGAGTTTCAGGACTG
Anxa10	ATGGGATTGAAATTTGGAGC
Anxa10	CACAACGCAGCAATGCACAG
Anxa10	TGAGCATCATAAGATGGTGG
Anxa10	AGTATCCCTGAAGTGTCCTG
Anxa5	TGATGCAGAAGTCCTTCGGA
Anxa5	TCAGCGCCAGGAAATTGCTC
Anxa5	AAGAGCATGCTTCAGCTCGT
Anxa5	ATACTTCAGGGTACTACCAG
Ap1ar	AATGCTTCGGGCTGCTCCGC
Ap1ar	AGAGCACTTGACCATAGAGG
Ap1ar	TTACCTCATCACTCTCCACG
Ap1ar	AAATCGCTGACTTACAGGAG
Apela	AGAGATACAAACAGTCGGGA
Apela	GAATCACTTTGTTTGGCCCG
Apela	GCCAAACAAAGTGATTCGGG
Apela	ACTTCGGTGAACTCACCTGG
Arfip1	GTTGACGATGCTCATGAGCA
Arfip1	TTTGGGAGATTCTTGAGCCA
Arfip1	GGTGATCTGACTGTTCCTGC
Arfip1	AGTAAGCTGACCCAGCAAGC
Arhgap10	GAGGATCCGCGCGCACGAAG
Arhgap10	TAGGTCTGTCAGCTGCCCAG
Arhgap10	TGAAACCCTGATTAAACCCT
Arhgap10	GAAGGACTCACACTTGCAGG
Arhgap24	TCAAGACTTGGCACACCCGG
Arhgap24	TACCTGGAACTACTTCGAAA
Arhgap24	GAGGAGATAGCTCTCATGAT
Arhgap24	AAAGAGGTACGGGAACCGGC
Arhgef38	ATGGAGCCCAGAGAAGCCGC
Arhgef38	AAAGCGGGCCAAGATCATCA
Arhgef38	GGAAGAGGCCACAACAGACG
Arhgef38	ACTTTAAGGACTGGAGGCAG
Arsj	CAGGCCTGTGGAGATAGCGG
Arsj	GTCTGGAAAGTTCTTAGCGA
Arsj	GAGGACCGAGAAGCCTGCCA
Arsj	GCAATCTGGGCCCAAACCGG
Asb5	TATGGAGTAAGCCAAGGACA
Asb5	TGACTTGCAGCTTCATGCAG
Asb5	TTCCAGGAGAGTCCTTGCAC
Asb5	TGTGAGCATGCGTTGAACAA
Asic5	TGAGAAATCACAAGTGCACG
Asic5	GAACCAGAACAAAGTTCGAA
Asic5	TGTTGGCACTGATTTCCTGA
Asic5	GAAGCAAAGTGGATACCTGA
Atoh1	GCATGCAGAAGAGTGGGCTG
Atoh1	GTGGGAGTCAGCCAGGCGCG
Atoh1	GAGGCTGGCAGCAAACGCAA
Atoh1	TTGCAGGAAGCTGTGGGCGG
Bank1	GTTGGCCTAGCACCTCCAGG
Bank1	TCAACAGAGCAGGATCCGGA
Bank1	CCAGGAAGCACTAGTACCCG
Bank1	TCAGAGCACGGCCAGCACGT
Bbs12	ATTGGATTTAACCTGTGCAG
Bbs12	TTAGCAGTTGGCTTGAGCCA
Bbs12	TCTGCAGCAAGCCAACTGGA
Bbs12	GAGAAGGTCTTCCTTGGCGG
Bbs7	AAGCCGGGCAGACTACCTCC
Bbs7	TGCTTCCTACCTCAAGACAA
Bbs7	GTGGTTGTTGGAGATCAAGA
Bbs7	CAGTGTTCAAGACTTTACCA
Bdh2	CAGGGATGAACTCACTAATG
Bdh2	CAGGAGCTGGAAAGTTACCG
Bdh2	AATCCAGGATGGTTCCGTGG
Bdh2	GATCGGTCTCACCAAGTCCG
Bmpr1b	AAATGTGGGCACCAAGAAGG
Bmpr1b	GACAGTCACAGAGATAAGCA
Bmpr1b	AAAGACAAGAAGCCCGACCT
Bmpr1b	GAAAGTGTTCTTCACCACGG
Camk2d	ACTTCACGACAGTATATCGG
Camk2d	TGTGTTGACAGAGTGACTGG
Camk2d	AGAAGTTCAAGGCGACCAGC
Camk2d	TTCCATAAGGATCTTTACGC
Casp3	CATGCAGAAAGACCATACAT
Casp3	CAAGGAATGTCATCTCGCTC
Casp3	AAGTTGACTAGCTTCTTCAG
Casp3	GGCTTGCCAGAAGATACCGG
Casp6	AAACCGATGGCTTCTACAAA
Casp6	TCCAGCCGAGCAGTACAAGA
Casp6	ACCTGACCCTCCCAGAGAGG
Casp6	TAGCCAGCATGACGTACCCG
Cbr4	GAAGTGGCCAAAGTCACCGC
Cbr4	CATACCGCCGAGCTCGCCGG
Cbr4	AAGACAATGATTCAGCAGGG
Cbr4	ATTGGTTTGAAAGGCAACGT
Ccdc110	TAAGCGACAGAAATGAGCCC
Ccdc110	TGTTCCAGAGAAGCACCTCG
Ccdc110	GATCCTGAATTCCTCTGAGG
Ccdc110	GACTCTACAGAACGTCAGCA
Ccna2	CGAGTCTTGAGCTTCTGCTG
Ccna2	GACACCTCTTGACTATCCAA
Ccna2	AAGACATTCACACGTACCTT
Ccna2	TGTGGACTGGCTGGTTGAGG
Ccser1	GGAGGAGCTATGCACACCAG
Ccser1	AAGGAAGATATATAGAGCGG
Ccser1	AGCCGTTCTTCTCAGCCCAG
Ccser1	AAGACACTGATCAAGAGGCC
Cdkn2aip	AGAGGGATATCAAGTAGCAA
Cdkn2aip	TAGCTGAGACACGCTTCCTA
Cdkn2aip	ACTGATAACAGACAACAGAG
Cdkn2aip	TCAGAAGCTCCACATAAACG
Cds1	AGCGGGACATGCTGGAGCTG
Cds1	TATGGAGATCTCGATGCCAG
Cds1	TACCAGAAGCATCAGCATGA
Cds1	CAACTTAGTGTCCTAAACCA
Cenpe	TGCAGCGGACAGGATGGCCG
Cenpe	AACGCTATTTATCAGAGCGA
Cenpe	TCCGCCATACAAGGCTACAA
Cenpe	TTGTTTGGGAGTTATACCCA
Cenpu	GGAGAAGTTTGAGATACTCG
Cenpu	AGAAAGCTGGTCCAAAGCCC
Cenpu	TAGATAGCCGTACTGTGCAG
Cenpu	AGAAAGCTGGAGCCCATCAG
Cep44	AGAGTAGCTGATGATGGGCA
Cep44	CAGTGAGAAACGCCCTGCAG
Cep44	TCCTGAGGCCCAGGACCCTG
Cep44	GAAGAGTGACACGACTTAGA
Cfap97	TCGTGAAGAAGTCAACACTG
Cfap97	GGTGACTATCATGAGTCCGA
Cfap97	ACAGACAGAGGGAACAACAA
Cfap97	TGAGGTAACTCATATTCCGA
Cfi	TCTCCACTTGAGTTCTTCCA
Cfi	CCTTCGATACATCTCTGCCA
Cfi	AAACAGCTGGAGCATGGCGG
Cfi	GTTGTCCAATGGCTTGGCGG
Cisd2	CGGGAGGGTTACCTGTGAGG
Cisd2	GCAGCTGCACCTTCACGATG
Cisd2	TAGGTGCTGGCGGTCCAAGA
Cisd2	GGAAGAATGGGCGCACTGCG
Clcn3	TGTATGACGCCTGGTCAGGA
Clcn3	AGAGGGATAAATGTCCACAG
Clcn3	GTATTTGCTCCATATGCCTG
Clcn3	GCAGCAGGCAACATGTACCA
Cldn22	AATGGGCTTAGTCTTCCGAA
Cldn22	AGTCTTCCGAACGGCAACGC
Cldn22	CTTCCGAACGGCAACGCAGG
Cldn22	TTACAAACTACTTGCCGCAC
Cldn24	GTTCTGAAGATGAAAGCCAT
Cldn24	AGAACGGCCATGCAATCAGT
Cldn24	GAACGGCCATGCAATCAGTA
Cldn24	TTACCACATATCTACCACAC
Clgn	TAAAGATGAACCTTCCTCGG
Clgn	GGTGCCTGGCGACAGAGGGC
Clgn	CAAGATGGTATTGATTGTGG
Clgn	AAGACTCACCTCTATACCCT
Col25a1	GCCGGCACAACGCTGTCCCA
Col25a1	TTAGAGTGCAACTGCCCAGC
Col25a1	CAGGTCCTCCAGGGAAACGA
Col25a1	GCAGCACTACCTTAATCAGC
Cops4	CTGGGCCAAATCCTGTCGCA
Cops4	TCTTCAAAGGAAATGACCCG
Cops4	GAGAAATGCAGCCCAAGTGT
Cops4	TGACGATCCCGTCCAGGCCG
Coq2	ATGCGGACCGAACGGCCCGC
Coq2	ACTGGAGCTATTCTGATGCG
Coq2	CAGGAGAACGCCCAGTGCCA
Coq2	TACAGAGGCAGGCATACAGC
Cpe	CATCAGCAGAATCTACACAG
Cpe	GAACATGCATGGTAATGAGG
Cpe	TGTGGGCCGCAGCAACGCCC
Cpe	GATCCAGTGAATGACAGCCT
Ctso	CCTGGTCTTGGAGCCACCAG
Ctso	ATTTACTCCATAGAAGGCAG
Ctso	TTTAGGCAGCAAATATGCCT
Ctso	AGGATGCTGGGCCTTCAGCG
Cxxc4	GCCGCTGGGAGTCGTTCCGG
Cxxc4	AACACTGCAGACCTTTGGCG
Cxxc4	ACACTGCAGACCTTTGGCGG
Cxxc4	CCAGCGCTGAAGCGTTCCGA
Cyp2u1	TGAGGACCACCACCAGACGG
Cyp2u1	CAGGCGCAGCAGCTTCGACG
Cyp2u1	AATGGCGAGCGGCACCACCA
Cyp2u1	CAAGGGTTCACCATTCCCAA
Cyp4v3	GATGCGGTCAATCCCGTCGG
Cyp4v3	TTATAAGGCAGAGAATGTGG
Cyp4v3	AGAAGTCCTAGTCCCAGCCA
Cyp4v3	GGAGCAAATGGCGCACCAGG
Dapp1	GCAGAGCAGAACTTCTAGGA
Dapp1	GAAGGGCTTCGGCAGCATGG
Dapp1	TTTGAAGCATCCCTATCCAA
Dapp1	AGAAGGCTATCTCACCAAGC
Dchs2	GAGCAGGGAGCTCTGCGCCC
Dchs2	TGTGTCCCAAGACATAGACA
Dchs2	TTGATGATCTCAGTTCCCGG
Dchs2	TTGGGCCTTTCAAACTCCGC
Dclk2	ACGGAAACGGTCGTTGGAGA
Dclk2	TTTCACCTCACTCTTCGCAG
Dclk2	AAGCTGGTGACTTGCTGCGG
Dclk2	GGACTTGGTGGACTTCGGAG
Dctd	AACGGGATGACTATCTGGAA
Dctd	GCCCGAGTATTTCATGGCAG
Dctd	GCAGTGATGACCTGTTGCCT
Dctd	GCTAAACTCATCATCCAGGC
Ddit4l	ATTTCAGAGTTGTTGGACGG
Ddit4l	TTGGACGGTGGCTATCACCC
Ddit4l	TGGACGGTGGCTATCACCCT
Ddit4l	TGAGCCCAACCTCAACGAGG
Ddx60	TGTGAGAGGTCACTTAAGCC
Ddx60	AATGCAGATGTTCTTCAAGG
Ddx60	TAAGCTACATTGCCTCAGTG
Ddx60	TAAGTGATGAGCCTTTGTTG
Dkk2	GCTCTCCACCATCAGCACCG
Dkk2	AACCAAGGACTGGCTTTCGG
Dkk2	AAGAAACGATGCCACAGAGA
Dkk2	CGGCATAGAGATCGCAACCA
Dmp1	AATCTGAAAGCTCTGAAGAG
Dmp1	TGGGTCACCACCACCACCCA
Dmp1	AATGTGATACTTACCGTGGG
Dmp1	AGAAAGTCAAGCTAGCCCAG
Dnajb14	GGAGGGCAACCGCGACGAGG
Dnajb14	GCAATGCGTGCTACTTCCAG
Dnajb14	GAAAGCATCCGTGGCTCCAG
Dnajb14	TAAAGTTAGCGAGTACCTGA
Dspp	GGAAGATGCACTTACCGGAA
Dspp	TCAACAATGTCTCTTTCCAG
Dspp	GTTCCTGGATGTGTTAGAAG
Dspp	GAAACGACGCCTCAGAGAGA
Ednra	AATTTGGCCCTGCCTAGCAA
Ednra	CAAGACGGTGATGCCCACGG
Ednra	GAAGCCGATTGCTTCCGGGA
Ednra	GAAGATTGCTGTGCACACCA
Egf	AAGGCGAGCAACAGCCAGGT
Egf	AAATCACCAGCAATTGGTGG
Egf	ACATCCGTCAAATATAGCAG
Egf	TGGGTTCAGGACAGTGGCGA
Eif4e	TCGATCTAAGATGGCGACTG
Eif4e	AAAGCTTACCTGTTCTGTAG
Eif4e	TCTCTAGCCAGAAGCGATCG
Eif4e	GTAGGAGGGTATACAAGGAA
Elf2	TCGGCGGTGGTTGACAGCGG
Elf2	GTCGTCATAGACCAGCACCT
Elf2	TAGGAGATTCCATATGAAGC
Elf2	TGGTGAAGTAGGGATAGGCG
Elmod2	AAAGAACATCTGCTCCGAGA
Elmod2	GCACGAGAAGATGCTCCTCA
Elmod2	CGGCCCGGATCTCCAAGCAG
Elmod2	TTATAGCTTACTGAAGAGCG
Elovl6	ACGAGAACGAAGCCATCCAA
Elovl6	AGCGAGCCAAGTTTGAACTT
Elovl6	TAAGCCCAGAATTTGCTGAC
Elovl6	AGAAGAGCACAAGGTAGCTG
Emcn	AGTCGCTTGAAGCAGCCGCA
Emcn	GCAGATGGAACACCTCCCGA
Emcn	ATAGTGGGAACAACAACTGA
Emcn	TTACTCACTGGAATAGGAGG
Enpep	GAAGACCTTGCGGCCACCAG
Enpep	TGTTGGGTTCGTCGAAACAA
Enpep	GATGCACAGCAAAGCACACC
Enpep	CTTCGAAGACTACTTCGCTA
Enpp6	GCAACACCAGGAGCTTCCGG
Enpp6	TCTGACCCGTTCCACCACAG
Enpp6	GATGTAGAAGGTCACCACTA
Enpp6	GATGACTGACATCTTCTGGA
Etfdh	GAACATCTTGGAGCACACAG
Etfdh	CGGAGCACACACGCTCTCAG
Etfdh	CTACCTGGAAGAATTGGCAC
Etfdh	CTGGATGGGAGAACAGGCAG
Etnppl	GTGCCTCTCCCTCAGCGCCA
Etnppl	CTTAGACTGCATCAACAACG
Etnppl	AAACGGAGAGCTCCTGAGGC
Etnppl	CAAGGGTGATCACATCCTGG
Exosc9	TGCGTGGCCCGCCACTATGA
Exosc9	GTTCACAGGAAACCTGTCCA
Exosc9	CCAAGGAGAGGAAGTAACAC
Exosc9	ATGGTGGATGCTCAATGGCA
F11	AACGTGAAGAGCAAGCACCG
F11	CGTCACAGAAATATTGCCAA
F11	GACTCCCGCTCACTCACCGA
F11	AATAACGAAGCTCAATGGCG
Fabp2	TCTGAAACTGACAATCACAC
Fabp2	AAACTGACAATCACACAGGA
Fabp2	TTTCCCTACAGTCTAGCAGA
Fabp2	GGAGCTGATTGCTGTCCGAG
Fam13a	AGAGAACACTACCTTCGCAG
Fam13a	AAGCAGGATGATGTCTGGCA
Fam13a	AAGCTCAGTGACAACCACGA
Fam13a	TATCTGACACCAAACAGCAG
Fam149a	AGGGAGCGGAGTGTGCACCG
Fam149a	AAGCCATTGATAAATTCGCC
Fam149a	CCGCTCCGTAGACAATCCCG
Fam149a	AATGCAGCGAATGGGCAAGA
Fam160a1	CATATATTACCTGTGCCCAG
Fam160a1	GCTAATCGAAGAGCAAGCCA
Fam160a1	AGGACACTGCGGAGCCGCAG
Fam160a1	GGAGGACACTGCGGAGCCGC
Fam198b	GCACGGTGAAACCCAAGCGC
Fam198b	GCGCAGGAAGAAGTATGCGG
Fam198b	GAAGTGCTGGCTGAATGGCC
Fam198b	TCACCACGAGTGGTCCAAGA
Fat1	GGTAAAGGAGAACCTCCCGG
Fat1	CATAGAGGTCTACATAGAGG
Fat1	TCGGTCCAGCTTCCTCGACG
Fat1	ATAGCCGCGGATAAGGACGA
Fat4	ACAAGGGTGAGCCAAAGCGG
Fat4	AGACACCCTGGATCTCACCG
Fat4	AGCATACGTGACCAGAGCGT
Fat4	GACGTTAAACACAAGGACCG
Fbxo8	AGCCACCGGAAACAAGCCCA
Fbxo8	AAACACAGGAAGCTAAGCAA
Fbxo8	AGTGAGCTACTTTATGTCCA
Fbxo8	TAAGGCCAAGTTCTCGCATG
Fbxw7	TCAGAACCAGAACGCTGCTC
Fbxw7	AGGAACGAACTTCAGAACCA
Fbxw7	TGAGAGCAGCCAATGGGCAA
Fbxw7	GCAAGGAGATGAAGTCTCGC
Fga	AGACACCATGCTGTCCCTGA
Fga	GAATTCCTATCAGAAGGAGG
Fga	CCAGGGCCAGGCTTACCTCC
Fga	GGAAGCGAAGCTCACCGGGA
Fgb	GAAGACAGCCTCCTGCATCG
Fgb	TGTTGCAATGTACATCCCGT
Fgb	TGTCAGCTGCAACATTCCAG
Fgb	GTGTGAGGAGATCATTAGGA
Fgf2	GGGAAGCGAGGTGATGCCGC
Fgf2	TTCCTGCGCATCCATCCCGA
Fgf2	TCTCGCGGACGCCATCCACG
Fgf2	GAAGTGGCAACTCACCGTGT
Fgg	CAGCAAAGAAGGAAACTCGG
Fgg	TAGGATGCAACAGTTATCTC
Fgg	TCGGAGATCATTGTCCACGT
Fgg	TGTCAGGAAATTGCCAACAA
Fhdc1	GCAGCAAGAAGACACCTCCA
Fhdc1	GCAAAGCGAAGTATGAACAT
Fhdc1	TTGAACAGAGAGGAACAAGA
Fhdc1	AACAGAGCTGATGTTATGTG
Fnip2	GCACGCGCTCACCTGAAGGC
Fnip2	AGTCCTGGTAAACTAGCAGG
Fnip2	TATGTAGTGTATCTTCAGGG
Fnip2	ATTAACCAAGATCCTCAGGC
Frem3	GGAAGAGGAAGTCCACCCGG
Frem3	TACATCCTGAACAAGGGCAG
Frem3	GAAGTGACTCTCACCCGCAG
Frem3	TATAAGTCCTACCCTCCATG
Frg1	TACATAGGAATATTCGGCCA
Frg1	GCTTACCCACAATATCAAGT
Frg1	TATATCCATGCACTGGACAA
Frg1	ACAGCAGTAAACTGCTCTGG
Fstl5	TCTTTCTGGCATCTGAAGGG
Fstl5	GCAGTCTTCATTGTGAACGA
Fstl5	CATATCTAGGAAGAAGCCGT
Fstl5	TTGTCAGGTGATTAAACAGG
Gab1	ACGGCGTGCACCATGAGCGG
Gab1	AGGTGGTTTGTGTTGCGCAG
Gab1	AGAAGCTTCCATCTGACTGG
Gab1	GAAATGGTATTACTCCGGGA
Galnt7	GCGAGGACAGGGAAGACCAG
Galnt7	AGATGACAGATTCAAACCTG
Galnt7	ACTGTGGACTGTCCTCATGA
Galnt7	CATTTCGAAATACCTTCACG
Galntl6	GGTGAAATCTGCAGAACCCG
Galntl6	CTGGGCAGAGATGTCTCCGG
Galntl6	CAGGCTGGACGTCTGTGTCA
Galntl6	ATAGCAAGCATGGAGCCACA
Gar1	GCAGCAACAACCACTTCCGA
Gar1	GGAGGCGGAGGCTTCAACCG
Gar1	GGGCACCTTGTTCTCCTCGG
Gar1	GGTGAGAAAGGACCTCCCAG
Gatb	TTAAAGCCCAGCGTCTTCCA
Gatb	TGCCAAGCCAGTCATCACCG
Gatb	GCTACCAGATCACCCAGCAG
Gatb	GCTCCAGGACCACTTCAAGA
Glra3	CCTGAAAGCAGTCTTATCCA
Glra3	AGAAGAGCTACCTTTGAAGT
Glra3	TTGCATGTGACATTAACTGG
Glra3	TATTCACTGTATGCAAGACG
Glrb	CTTTAGTCAGCAGTCACCCG
Glrb	AAGCTACCTAGTGACTTCAG
Glrb	AAGCAGGGAAGCTTACCCAG
Glrb	GACCACAGCGTACTCCACGA
Gm17359	CCGGGAGCCACACTGTGAGA
Gm17359	TATAAACACGAGTACACCTG
Gm17359	CTGTTGAAGAAACTGTACTG
Gm17359	CGAACTAAGTCTCCGCGCGA
Gpm6a	AACGCCTGCATACAGCAGGA
Gpm6a	AGAAGGTTTCTTCACAACTG
Gpm6a	GCTGACATACCTCTTCATGT
Gpm6a	GAGGATGTGTGAATCTACTG
Gprin3	GTCAAGGCCAGCCCGCGCAG
Gprin3	GAAGAGCCAACAGAACACCT
Gprin3	GAGGGTGCAGGACTGACCTC
Gprin3	TGGGAGGGAAATCTGGCCAA
Gria2	TGTCAGTCTGAACTCCGAAG
Gria2	GGTATGCGAACTTATCCCAT
Gria2	TATGCCTAGGGATTTACTGA
Gria2	AATAGAAAGGGCCCTCAAGC
Grid2	GATGTGGATGATAGAATCAG
Grid2	TGAGGTCACCAACTGCTGTG
Grid2	GAACCAGGGCATCTTGGCCT
Grid2	TTTGGACAAAGTATCCCAGC
Gstcd	AAAGTTACAGACGTGTGGAG
Gstcd	AGAAGGACTGTACTTCACTT
Gstcd	TGATACCAAGAGGTTAGTAG
Gstcd	GCTGCCGTCAGCCCGAAGGA
Gypa	TCTTCAAATAACCACTCCTG
Gypa	AGTTGAAGCCACCACAGGAG
Gypa	ACGCAGCAGACACTTCAGTA
Gypa	AACGCAGCAGACACTTCAGT
H2afz	CCGCAGGCTGGCGGTAAGGC
H2afz	CAAGCCGGCTCGCTGCGAGC
H2afz	TGTCGATGAATACGGCCCAC
H2afz	GATGGCTGCGCTGTACACAG
Hadh	AAGCATGTGACCGTCATCGG
Hadh	GAATTGAGGAGAGTCTAAAG
Hadh	TGAAGAACGAGCTGTTCCAG
Hadh	ACAAGCTTCATCATAGGCAC
Hand2	GGTGGCCAATAAGCCAGCCG
Hand2	ATGGGAGTGGTCCAGGCCCG
Hand2	AGAGGCGGAGGCCTTCAAGG
Hand2	AAACCAAAGGCCGGACAGGC
Helq	TGCGGACAGACACCCGCCGG
Helq	GAGAAGTCATTATTTGGCTC
Helq	GGACAATGGCCACATACGGA
Helq	GAAGAATATGCTGGAAGCAA
Helt	AAACGTTACCTGTTTCGCCA
Helt	GCTGGGCAAGACAGTCCCTA
Helt	TTCCGGGAAACTGGAGAAGG
Helt	GAGTTCCGGGAAACTGGAGA
Herc3	GATACAAAGCGGCACACCTG
Herc3	TGATCAGCATATCATACACG
Herc3	CAAGCAGTGCCAGTTGCCAC
Herc3	AGAGGGTGAGATCTTTGGAA
Herc6	GGAGAGACCAGAGTACCGAA
Herc6	CAAAGGAAAGGTCTTCGCTT
Herc6	CAAAGAGTGGTAGTGTCCAC
Herc6	AGTGAAGGACAACTGGGCCT
Hhip	TAAGCTGCTACTGCTGGCCG
Hhip	CTTTGCAGTAGTCTTTGCAG
Hhip	GGAAGACTACGAGAAAGTGG
Hhip	TCTCTAGAATGAAGAGCCGA
Hpgd	CATAGGCAAAGCCTTCGCTG
Hpgd	GCTGACCAGAAACAACTGAG
Hpgd	CGGATTCACACGCTCAGCAG
Hpgd	TGGGTGTGTCCACAAAGCCT
Hpgds	AAGCAGTTTGTAGTTAGGCA
Hpgds	TTGCTATTGCGAGGCTCTGG
Hpgds	TGATGCAGTGGTGGACACGC
Hpgds	GCAATGTCAAGCTGATGCAG
Hpse	GAGGGACTCACGCTTCGGAG
Hpse	TGGAAATCTCAAGTCAACCA
Hpse	GGTGTTGAGGAAACTCCAGG
Hpse	CAAGGGTTATAACATCTCCT
Hsd17b11	GGAGAGATCGTCCTGATCAC
Hsd17b11	ATGCTGAAGACGATGAGCAA
Hsd17b11	CTGGCTGCAGTCCACCACAA
Hsd17b11	GTACCAGTAAGCCAGCAAGA
Hsd17b13	GCAGACCGTTCTCATCACGG
Hsd17b13	CACCACAAACACGTGCACGA
Hsd17b13	GATCGTGGTAAACAACGCCG
Hsd17b13	TGAGATAAGGAATCACTCCA
Hspa4l	GGATCCAGAACTCGAGCCAT
Hspa4l	GATCCTCTCCGTTTGCACAA
Hspa4l	AGTGACTTGCTCAATTGCAA
Hspa4l	GACAGTTTAGGCCTGCAACC
Ibsp	TCAACTTACCGAGAAAGCAC
Ibsp	CCATCGAAGAATCAAAGCAG
Ibsp	TGGACTGGAAACCGTTTCAG
Ibsp	AGACGGCGATAGTTCCGAAG
Il15	GAAACACAAGTAGCACGAGA
Il15	TCTTACAGCTGTGTCAGTGT
Il15	GTCACTGTCAGTGTATAAAG
Il15	AAGACAGAGTGCTGTTTGCA
Il21	GGTGACGAAGTCTAATCAGG
Il21	TCAGGAGGCGATCTGGCCCT
Il21	TCGTGGCCCAGCTCAGGAGG
Il21	AAACTCAAGCCATCAAACCC
Il2	AAGTGGGTGCGCTGTTGACA
Il2	ATTTGAAGGTGAGCATCCTG
Il2	AAATCCAGAACATGCCGCAG
Il2	TGAGATGATGCTTTGACAGA
Ing2	GAGCTGGACAACAAATACCA
Ing2	AGAGGAACGTGTCGGTGCTG
Ing2	GCAGCAGCAGCTGTACTCGT
Ing2	ATCGATGGCAAACTCGACAG
Inpp4b	AGCTCAGGCAAATGACCCTG
Inpp4b	CCGAGAATGAATTCCAACTG
Inpp4b	GATCTCAGTAATCCACCCGG
Inpp4b	AACGGGTGTCACATTCCCAC
Ints12	TTGCCGTTACTACTGCCGGA
Ints12	TAGTGCTGATGACTTTGCCA
Ints12	CACAGTACCACACCAGGCGA
Ints12	ACAGAAACAACAGTGGGCGC
Irf2	TTGTTCAGCCACTTTAGCCC
Irf2	GCCGAGCCGCATGCATCCAG
Irf2	AGAGAGAGTTAAGCACATCA
Irf2	GAAGTCAGGACCGCATACTC
Jade1	AGTGAGGATTCTGACGACAA
Jade1	TGAAGATCGAAAGCCTTCTG
Jade1	GTCCAGGTGCCTGTGAGCCC
Jade1	ATCGACGTAGCCTAACGCTG
Klhl8	ATGGCTTCAGAATCTACCAA
Klhl8	TCGGTTGTGACTCTCTGCGA
Klhl8	ACCAGCAGTGTGCTTCCTCG
Klhl8	TCACACCCACATGTCGCCTG
Lamtor3	AGGTCTCAGGGCGTGCTCTG
Lamtor3	TTTGCCCTCGCAACAGACCA
Lamtor3	GCTGCCTTGGTCTGTTGCGA
Lamtor3	AAAGTCCGAGTTTGCTGCCT
Larp1b	AGGTGAATTGGTTAACACGG
Larp1b	TCCTACTGAGAACATCAGCG
Larp1b	GCCAGGAAAGACCTGGGTCC
Larp1b	ATCGAGGGTTCCCTCGGCCT
Larp7	AAAGGACGAGGAGGAACGCA
Larp7	AGGTGAGAGACCAAAGGACG
Larp7	TTGTGCACTGACCTTCTCCT
Larp7	AGAGTGTTCCACCCAGGAGA
Lef1	GATCAGTCATCCCGAAGAGG
Lef1	AATCTGGCTTACCTTCATCA
Lef1	CCAGGAAAGCATCCAGACGG
Lef1	GCAGTCAAATAAAGTGCCCG
Lin54	TGGAAGCAAACTATTCACCT
Lin54	GGACAGATAACCTGTGACGA
Lin54	ACATTGGGAGCAGTGGCCAG
Lin54	TGGAACTGACATCCGTACAG
Lrat	GAAGTCCTTACTCAATGAGG
Lrat	ACACCTCCAACACGTCGCCC
Lrat	TTTAGCGTGAGCGTCCCGGG
Lrat	ATGGGATACAGATTGCAGGA
Lrba	CCACCAACAGGTGATGACGG
Lrba	TGAGAGCATTATGTGCATGG
Lrba	GAAGCTCACTGTTCTTCCAC
Lrba	GTTCTGTGGCCAGATGACTG
Lrit3	TACTCACAGGAGCACTGAGA
Lrit3	GGAAGCTAAGCACAAGGCAC
Lrit3	CCAAGAATAATTCTTCTCGG
Lrit3	GATCAAGAAGAACAACAGCG
Lrp2bp	TATCCACCAAATTAGCGTGG
Lrp2bp	GATTTCCTCAAACTGTGCCA
Lrp2bp	GATCAGATGAGGAAGCAGAG
Lrp2bp	AGAGCCCAAAGAGTTGGAAA
Mab21l2	CGAGTGCGAGAAACACCCGA
Mab21l2	ACGAGTGCGAGAAACACCCG
Mab21l2	GTGGCGGAGGTCAAGGCCGA
Mab21l2	GACACTAGTAGCCCAGGCGG
Mad2l1	GAGCAAGGCATCACCCTGCG
Mad2l1	AGCAAGGCATCACCCTGCGT
Mad2l1	TCAGCGTGGCATTTATCCGT
Mad2l1	ACTCTAGTAAAGGTTTCCGA
Maml3	GATACTACTACCATTCGCGG
Maml3	GTTCCATATGGACTTGACGG
Maml3	GGTCTCCGGAGCCAGTCCTG
Maml3	ATGGGTTCCGCTGTTGCTGG
Manba	GGGCGCTGTGCACATAGCCG
Manba	AGATAACTGGACCTACAGCA
Manba	CATGTTGTCTGTCTTCCCAA
Manba	TTCACCCTTCTGCTCCACCG
Map9	GGCGTACACCAAGAGTCCAA
Map9	TGATCAGAGCCATTACAGCC
Map9	TCACAGTGAAGCCTACACCC
Map9	TTTAACATGCTCCTTGGCTG
Mapk10	AGGAACACACACCTGACAAA
Mapk10	ACAGGGATTCGATAAACACG
Mapk10	TAATGGCCACATTTCTGTCA
Mapk10	GAGTAAGAGCTCTCACCCTG
Mepe	AGAGGGCCTCATGAAGATGC
Mepe	AACACACCCGCCAGACCCGA
Mepe	TAGGCTCTAATGAGATCCCG
Mepe	AAAGGGATGTCACAGCGGAG
Metap1	GCAGCCAGGCAGCATGGCGG
Metap1	GTGATGTCAACACTGACCCA
Metap1	AGCCAAGCAGGACTTACCTA
Metap1	TTCTTACTAAGTGTACAGCG
Mettl14	GGGAGCGGCAGAAGTTACGG
Mettl14	GCTGAGAGTGCGGATAGCAT
Mettl14	AAACGGAAGTGTCTGGATGA
Mettl14	CAGACCTCAGAATTTCATCA
Mfap3l	GTGGTAAACACACAGTCAGA
Mfap3l	GTTGGTCACACTCTTAGCAG
Mfap3l	AAATGGCAAATGCTGGACGG
Mfap3l	TGGCCTCCTGAACATCACCA
Mfsd8	GCTGGAATTATGGCGAACCT
Mfsd8	ATAGAGGTGAAGCTACCATT
Mfsd8	TCAGGAAAGAACAAATGCCA
Mfsd8	GATGAACCTCAGATTCCTGA
Mgarp	GGGCGCTGATACCACCAAGG
Mgarp	GGAGGGCGCTGATACCACCA
Mgarp	GCGCTGATACCAGCCAGGAG
Mgarp	GGGCGCTGATACCAGCCAGG
Mgat4d	AAAGAGCAGGACGGCAACGA
Mgat4d	GGAATCTCCACCATTAACAG
Mgat4d	TGAAATGACCTCCAAGACGC
Mgat4d	GATGCTGTATGCCCAGCCCA
Mgst2	AGAGTGAAAGAAAGATGGCC
Mgst2	GAGTGAAAGAAAGATGGCCG
Mgst2	GAAGAGAGACTGCAGCCAGC
Mgst2	TCCAGAGGGCCCGTGACTGC
Mmaa	ATTAGGAGAAAGTAGCAGCG
Mmaa	GATCCATCTTCTTGCACCAG
Mmaa	TAGAGTATTACACTCACCGA
Mmaa	AGGGCAGTCGGAGTTTGCTG
Mmrn1	ACTCTGAAGGAATTTCAACG
Mmrn1	ACTGGCTCTCATTTACCAAG
Mmrn1	GGTCCAAACTGTCAGCTCAA
Mmrn1	AGTCACACCGCTGTTGACCA
Mnd1	GCTTCTCCAGGTCTTTCAGC
Mnd1	GGAAGTCCTTCAGAGCCTAG
Mnd1	ATATCGAGAATGTGACCCAC
Mnd1	GAAGCCGCCAATCGATGGAC
Mrps18c	GCGGAGAACCATGGCCGCTC
Mrps18c	GAGGAAGAATTTGACAACCG
Mrps18c	ATCCGTGAAGCAGCCAGCCG
Mrps18c	TTTATCCTAGCCAGTCCCAA
Msmo1	AAAGTTCCAGATCGCAACCT
Msmo1	GATAAACCAGAAACCTTCGA
Msmo1	ACAGGTACTTAACTTTGGCA
Msmo1	GTGATCACGTAATTCTCCTG
Mtnr1a	GAGGGAGACCACGACCGTCC
Mtnr1a	GAGGATGAAGGCCAGTGTAG
Mtnr1a	GCCCAGAATGTCCACCACGA
Mtnr1a	AAGGGTAAACAGCCACCACG
Mttp	TCAAGTGATCCAAGTCACGG
Mttp	CATAGGGAAGGACAACCTGG
Mttp	AAGCTCTGGAACTACCAACG
Mttp	GTTCCAGGTAGATATCTCTG
Myoz2	GCAAGCATCAGCCATCACGA
Myoz2	GATGTTGACGGCATGGACCT
Myoz2	GATGGAAGCAACCTGGAAGG
Myoz2	GTCGTGTTAAACCTTTCAGG
Naa15	TTGGGCGGGAGGCTCACGGC
Naa15	GCTTATGAATTGGTTCGCAG
Naa15	GATGCTGCTGACGTTTATAG
Naa15	TGGTCAGCCATCCATTGCTC
Naf1	GAGCGTCTGCAGCTGCGCGG
Naf1	TCTCCATCTGACAACACAGG
Naf1	ATGCTTGAAACCTTCCCAAG
Naf1	AAAGTGATCGACAAGCAGCA
Nap1l5	GAAGCGCTGCGATAAGATCG
Nap1l5	GGGCTTGGGCGCGTTCTCCG
Nap1l5	CTTGGGCGCGTTCTCCGCGG
Nap1l5	GTAATGGAAGGCGCCCAGGG
Ndnf	TTGAAGTGAGTGGTAACAGG
Ndnf	GAAGCTGCCCACCCGAGATG
Ndnf	CTTGCGATGCACCTTTGGAG
Ndnf	AGGAGGTCACATCAACTCTG
Ndst3	AGTGTGATAATGGAACCGGA
Ndst3	AAGATTCTGAGTGTCAAGCA
Ndst3	AAACCAGCTAGATATCGGAG
Ndst3	GTTCTCCCAAGACAAACCTG
Ndst4	TATGGAGCAGAGGAGACTGG
Ndst4	AAGGTGACGACCTTCTGCTG
Ndst4	AAGCCCTTCCTGTACCGCGC
Ndst4	AGTATGTGTGAACAGCCCAC
Ndufc1	ACTCACAGCAGCTCGGCAGC
Ndufc1	ACAGCAGCTCGGCAGCCGGG
Ndufc1	AACGAGCGCAGCACTACGGA
Ndufc1	TTGGCAGTTGGACTGTCCGT
Neil3	CGAGGTAGCGACATCAGCCA
Neil3	TGGCGTGGAAACCTTAGGGA
Neil3	TCTGGTGAGCTGCACCGCCA
Neil3	AATGAAGCACTCTTTGACAG
Nek1	CAGTCTCACATACTTCTCCA
Nek1	TCACCGAGACATAAAGTCAC
Nek1	AAAGATGGGACAGTGCAGCT
Nek1	GAGCTGGCTCGAACTTGCAT
Neurog2	AGCGCATCAAGAAGACCCGC
Neurog2	GTGGAGTTGGAGGATGACGC
Neurog2	AGTAGTCCACGTCTGACCCG
Neurog2	GCATAACGATGCTTCTCCGG
Nfkb1	GTAGGGATCATCGTCTGCCA
Nfkb1	GAACAAGAAATCCTACCCAC
Nfkb1	CCTGCACGCCCACAGCCTGG
Nfkb1	TATCTACAAGCAGAAGGCGG
Nkx6-1	GAGTGATGCAGAGTCCGCCG
Nkx6-1	GAGCCGGCCCTCTATGCCGG
Nkx6-1	TTGTTCGAAAGTCTTCTCCA
Nkx6-1	TGGACAGCAAATCTTCGCCC
Npnt	CATGGCTGTGCTCCTAGCGG
Npnt	GGCAGGATTGACTGCTGCTG
Npnt	AGGATAAGGTGCCAGCTCAA
Npnt	AACAAGTGCAAATGTCACCC
Npy1r	CAAGGTGAATATCACAGCCA
Npy1r	GATGGAGACACACTGTACAA
Npy1r	TAATCATCAACCCAAGAGGG
Npy1r	GACGGCGAAGGCGACCACAA
Npy2r	GTGACCATTACCATCAGCGA
Npy2r	GAGAAAGATATGATGCCCAG
Npy2r	AACGTACAGGATGAGCAGGG
Npy2r	GGTGGTAGACAATGCAACGA
Npy5r	ATCATGACATGTGTAGGCAG
Npy5r	GCCACTCCACGTCTTCCACG
Npy5r	ATCCAGTAAGGTTATTCCAG
Npy5r	AAGGCTGTGAAACACTGGGA
Nr3c2	TGAAGGCAGTGCGTTCCCGG
Nr3c2	GAAGACTTTGCAGCTGCCGC
Nr3c2	GAAAGAACTGTCCTGCCTGC
Nr3c2	GCCATCAGTGAACTCTGCGC
Nudt6	CAAGAGCCTCCGGAAGGCGG
Nudt6	TGGATGCCGCCGCCTTCCGG
Nudt6	AATGAAGTGGCTCTGCAGGA
Nudt6	AACATGTGGAAGTTTCCAGG
Nudt9	GGCCACCGAGAGCGACACGG
Nudt9	GTGGCAGGACTACAACCCAG
Nudt9	AGGACAGGACTGGTTGGCCG
Nudt9	TGGAGAGTGGGCAATCCCGG
Ostc	TCTTACTTCCTCATTACCGG
Ostc	GAAGTAAGATACCACTACCA
Ostc	GAAGCTGAAGAAACCGCCCT
Ostc	TGAAGCTGAAGAAACCGCCC
Otud4	GTATCGGAAATTGGTCGCCA
Otud4	TCGGCATGTGGAGGTTAGGA
Otud4	ACAGGAATGGGTAGGACAAG
Otud4	GATGGGACTAGAAGCCTCTG
Pabpc4l	GGAGGCAGCGGCGAAAGCAA
Pabpc4l	AAGGTGATGAAAGATGCCAC
Pabpc4l	AAGGTGATGACTGATGGAGA
Pabpc4l	GAAGACATGATCGTTCCAAA
Palld	TCACAGGAAACCCAACGCCC
Palld	GCACACCTTGGTCATTGCTG
Palld	AAAGGCAACTCACTGTGGCA
Palld	CTGGAGGCACAATTACCTGT
Papss1	CAGACTCCCAGGAATCTCCA
Papss1	ATGTCAGCAGGAATAAGAGA
Papss1	GATGGTGACAACATCCGCCA
Papss1	AGGCCTCTACAAGAAGGCGC
Pcdh10	GATGAAGGACACCGAGCCCA
Pcdh10	GTGCCGGTAGAGGAGTCCGG
Pcdh10	GATAGCTGAGCTCTGCTCGC
Pcdh10	GATCATGATGTCACCAACCG
Pcdh18	TCACAAAGGAGACATCACAC
Pcdh18	AATGATGGTCAGCACAACGG
Pcdh18	TTCTCTCCATGCTTCACCAG
Pcdh18	ACGGACGGGAGAATTCCAGC
Pde5a	AGTAAGAGAAGGTAAAGTCC
Pde5a	ATTGTTGTCAAGGATTCCGA
Pde5a	ATTGGCTTACCTCTTCCCTG
Pde5a	GAAGTGCACCATCTTCATTG
Pdgfc	ATGTCAGCAGGAGGAGGCCG
Pdgfc	TATGAGGAAACTTCGGGCTG
Pdgfc	GAAGTTGAGGAGCCCAGTGA
Pdgfc	GTACCGAATCAGCTCTTCCA
Pdha2	TGAGCCACTTATGTGCACCA
Pdha2	GACACAGTATGAGCGACCCA
Pdha2	GCGATGGTGCGGCTAACCAA
Pdha2	TGGGCAGGAAGCCTGCTGCG
Pdlim3	TCAGCCTTTGGTCATCACCA
Pdlim3	AATCTTGAGACACAACTGGT
Pdlim3	CCATAAGCGAGTTTCTGCCC
Pdlim3	AATATCCAAGACGCGCTCCA
Pdlim5	TCAGGCACATGTCAGAATAG
Pdlim5	TGAGCCGGTTTCCGTCCAGA
Pdlim5	GACACAGAACCAAAGGGCCG
Pdlim5	ACTGAGTCGTTCCAGTCCGG
Pgrmc2	GAGCAGCTGCGCCAGTACGA
Pgrmc2	GAAGAAGCGGGACTTCAGCC
Pgrmc2	CTGGCAGGGACGCCTCCAGG
Pgrmc2	TGCTGGCAGGGACGCCTCCA
Pigyl	AGGCCTGCCAGCGAGACCAG
Pigyl	GAAGCCTTCCTCCACGGAGG
Pigyl	TGGGAAGCCTTCCTCCACGG
Pigyl	GAAGCACAGGCTGCTGGCGC
Pitx2	TCACGGACTCTCCCAAGAGC
Pitx2	CCAGCAGCAAGCTGTTCCCG
Pitx2	GAATGAGGATGTGGGCGCCG
Pitx2	CCAAGAAGAAGCGGCAACGC
Pkd2	CTGGAGCAGGACGAAAGCGG
Pkd2	TTTCAGGTACTTCTCTCGGT
Pkd2	ATTGGAGCTCATCATGCCGT
Pkd2	ACAGAGCTCCATTTGGACCG
Pla2g12a	GAGGGTGGCCCTCCAGTCGG
Pla2g12a	GTTGCGGATGGTCTTGAGGG
Pla2g12a	TTTACATGAACGCCAAACAG
Pla2g12a	AAGCAAGAACGACTGTGACG
Plac8	AGTCACTGAAGCAATCACAC
Plac8	ACTGAAGCAATCACACAGGC
Plac8	ACACAGGCTGGTCTGCCAGT
Plac8	AGAGCCATGAACGCTTTCTA
Plrg1	AAACGGCGGCGACATGGTGG
Plrg1	TATCAGCCACAAACATGTCA
Plrg1	AAGCAGTATCCCGCCAACCA
Plrg1	GGACGGTAACGCCACAGCGA
Pou4f2	TATGCAGACATACGCACCGG
Pou4f2	AGCTCCAGCAACGCTGGCGG
Pou4f2	GCGTTCAGCATGCCTCACGC
Pou4f2	GCTTAGTGAGCTTCTCGCGG
Ppa2	AGGGACATGACGCGGCGCGG
Ppa2	TCTGAAGGCGGACTGTAAAG
Ppa2	TGGTTGTGGAAATACCTCGG
Ppa2	ACAAGGATGTTACCTGAGGG
Ppid	TATACGTACTTCGGTGGAAA
Ppid	GTATACGTACTTCGGTGGAA
Ppid	AGTTTGTATACGTACTTCGG
Ppid	ATCTCTGCAGCATGATCGGG
Ppm1k	GAAGTGGAGAAGTAGCAGGC
Ppm1k	CAGGTGGGCATAACTCGCGA
Ppm1k	GTAGCAAGCCTCCTGACCTC
Ppm1k	ACTAGGATCAAGAAATTCGG
Ppp3ca	GCTGGAGATGTCCGAGCCCA
Ppp3ca	AAAGCACATCTCATGAAGGA
Ppp3ca	CTTGATGAAGCTCTTTGAAG
Ppp3ca	CAGTTCCTGTGTGTACACGG
Prdm5	CACCCACCTTGCGCACGCGG
Prdm5	GGACTACAGACTGATGTGGG
Prdm5	ACGAGGCACCATCTCAGGAG
Prdm5	AGGCAAAGTTGACCACTCTA
Primpol	ACGGTGAAATAGCTTCCAAA
Primpol	AACTTCATAGCAGTGCAAGA
Primpol	GGAGCTGAAATATTAGGTGT
Primpol	TGATGAAGCTAAGGTCCCAG
Prss12	AGCTCAGCCCAACTGGCCGG
Prss12	AGCTGTACCACGCTGGCCAG
Prss12	TCAGTGGCATTGCCAAAGCA
Prss12	GGTGTCATCAGACTGGCAGG
Prss48	AAAGCAGCAGCAGAACCTTA
Prss48	TGTGGACGACCTGTACACAC
Prss48	CCGGGAAGACAGCTTCAGCA
Prss48	TGACCCGCTCCAGATCCGGG
Ptpn13	TGTGTCACTGGCAGAAGCCC
Ptpn13	GTAAAGGACACACTGCCCGA
Ptpn13	TGGAATGACATTGTATTGGG
Ptpn13	GGCACTGCAAGCATCCAGGA
Pyurf	GCAGCGCCGGGTGGAAGGTG
Pyurf	GTCAGAGCAGAGCCTGGCCC
Pyurf	GAGGTTTCTGCAAGTGCCCG
Pyurf	TGCTGAGCGCCACGTGCCGC
Qrfpr	GCAGGCGCTCAACATCACCG
Qrfpr	AGTGGCAGTACACTACCCGA
Qrfpr	GAGGCGTTGTACGTGCCACA
Qrfpr	GCATCACCACAAGCGGCAGG
Rab33b	GGAGATGGAGTCGTCGCTGG
Rab33b	AAGATGCGGGAGCGGGCGGG
Rab33b	GGACTTCCGAGAGCGAGCCG
Rab33b	GAAACCTGAGACCAAGCCTG
Rap1gds1	TCAATCCAGCATCTACACAT
Rap1gds1	AGTCATGAGCTTCTCACTGG
Rap1gds1	AATGCCCAGTAGCTTCACTA
Rap1gds1	GAAGGTGGATAGCAACAAAG
Rapgef2	GAGGACACGTGGGTCACCTG
Rapgef2	GATGAGCAGGGACATCGTGA
Rapgef2	GGAACCATTGTGTTAAACGA
Rapgef2	GTGGAGGTGACATATCCGGA
Rbm46	TTTGGTGGTCCTCCTCCAGG
Rbm46	GGATGCAGTAAAGTGCGCAC
Rbm46	GTGGGACTCATACTCAACAA
Rbm46	CAGCCACTGCATCTTCTCGG
Rnf150	GTTAAAGATGACCACAGCGG
Rnf150	GTTTCGGTATGCAAATGCCA
Rnf150	CCAGGTCAGGACCATCAGGA
Rnf150	AACTGCACTACTCACCGGCA
Rrh	TCATCAAGTACAAGGAGCTG
Rrh	GGTGAGCATTGGCTTACTCA
Rrh	AGGCGCCCAGGATCATGCTG
Rrh	GGTCTGCCCAGTCTCTGTGG
Rwdd4a	CCAGGAAACCTCTATCAGGA
Rwdd4a	GATATGACCGGAGCTGTCTG
Rwdd4a	GATGCTCTGCTTCACTGCCG
Rwdd4a	AGTGGAAGTGAATCTCGGCA
Rxfp1	CGAGCTGATGAGGACCACTG
Rxfp1	TTTCAGGAGACAACAATGGG
Rxfp1	TCTCGGCACAAACAATGCAT
Rxfp1	ATAAGAACACTCCCTCCCAA
Sap30	AATGGGAACGCAGCCGGCGG
Sap30	GGGAATGGGAACGCAGCCGG
Sap30	TCAGGACATCGACACTCCAG
Sap30	AAAGGAAGCGATGATGATGG
Sclt1	TCTCAGTAAGTCGATTTCTG
Sclt1	TAGAACAGCATGTCCAAAGG
Sclt1	TCATACTCAGCAATGAGAGG
Sclt1	CAATTGGAAGCCCTTCCCTT
Scoc	GATGGACGGATTGAGCACAG
Scoc	AAGATGGACGGATTGAGCAC
Scoc	TTTAAAGAGTTGGCGTTCGA
Scoc	GAACTCCAACACACACTTGA
Scrg1	CTAACAGCAAAGTTAGCCCA
Scrg1	CAATTGTCACAACCTTCCGG
Scrg1	AATTGTCACAACCTTCCGGA
Scrg1	GGTCGGCTCTGCCCTCCGGA
Sec24b	CGGATGCCGCCCAAGCTCGG
Sec24b	GGAAGGGCTGGACCTGACCA
Sec24b	GATACTACGGAGCTTGACTT
Sec24b	TCATCGGAAGCTGATGACAA
Sec24d	GAGAGATACCCATTCCAGGC
Sec24d	TACTTAGCTTACCTTTGAGG
Sec24d	GGTGCCACACTATTGACAGG
Sec24d	GGCGCGACTCCTCAGAGCCA
Sec31a	TTCTCTCTTGAGCTTACCTG
Sec31a	AGCACAAGACTTCATATCCA
Sec31a	TACTGGGCCAGTGAGAGCCT
Sec31a	TTTGCAACTCCAATGACGCC
Setd7	CATGGATAGCGACGATGAGG
Setd7	ACGATGACGGATTACCACAC
Setd7	GAGGATGGAGGTGTTCTCCA
Setd7	ATTGACGGAGAGATGCTCGA
Sfrp2	GGAGTGCGACCGTTTCCCGC
Sfrp2	GAGGTGGTCGCTACTAGCGA
Sfrp2	TTTGCAGGCTTCACACACCT
Sfrp2	TGAGGACGACAACGACATCA
Sgms2	AAACCCAAGACCTTATCCAA
Sgms2	GCGCAGATTCTTCTTCATCA
Sgms2	TGAAGAGGAAGTCTCCGCAC
Sgms2	AGCGCATGAACACTATACCG
Sh3d19	GAGGAAACAGCAGGCTTCGG
Sh3d19	TATTACAGTAGGCTTCCTGG
Sh3d19	GAGCAAGCCAGCGAATCGGG
Sh3d19	TAACCGCTCCTCCTCTGACA
Sh3rf1	AAGGGCGCAGGGCAGCACTG
Sh3rf1	GGGATACTGTACCTTTGCGA
Sh3rf1	ACTGACCGTGATCCGCAGAG
Sh3rf1	TGGCCAACAAGTCTTCCCAG
Slc10a6	TACGGAGGAAGACCCGCCCG
Slc10a6	GAGAGGCATCATTCCCAGGG
Slc10a6	TAGGTGGCCAAAGCAAGCAA
Slc10a6	TCACCCACCAATCTTGGCAA
Slc10a7	CCGTCGGTCGGAGTGAACGG
Slc10a7	GTTGAAGAATATCGTTGCGA
Slc10a7	GCAGGAGCTGACCAGCGCAC
Slc10a7	ATCACGGCAGAAGACACAGG
Slc25a31	CAAGAAGCAGTCTTCAAAGA
Slc25a31	TAGTGGGTATACTACACACA
Slc25a31	GAACAGAGACACCAAACCCT
Slc25a31	GGGCTTATTGCCAAAGCCAA
Slc25a4	GGCGACCGCCGTCTTGGAGA
Slc25a4	GCGCCCGGCTTTCAGCATGG
Slc25a4	CCAGCGGGTAGACGAAGCAG
Slc25a4	TGCCCAGAGTGTGACAGCGG
Slc39a8	GCGAGCTCCGGTCCCTCCGA
Slc39a8	GCAAAGCCCAGTCTTTCCGA
Slc39a8	AATCAGCAGGACATACCTGG
Slc39a8	CATGAGGAAACTCCTCACAC
Slc7a11	AAGGGCATACTCCAGAACAC
Slc7a11	GATGTAGCGTCCAAATGCCA
Slc7a11	TAAATAGCACGAGTGTCAGC
Slc7a11	AGGAAGAGACACAAGTCTAA
Slc9b1	CGACGTAGAATCAAACAAGA
Slc9b1	AAGAAGGGAAACACAAACGA
Slc9b1	GTCCAAACAAATTTCCACCA
Slc9b1	AAAGCTGAAGACCATGTGGT
Slc9b2	GACTCACCAACAGAACCCAA
Slc9b2	GGCCCTGAATGTCTTCCTGG
Slc9b2	ACGAACCAGAATGACAGAAA
Slc9b2	GATTCTCTCACACTTCCTGA
Smad1	CATGAGGTAGTCCCTTCCGG
Smad1	TGCCTCGGAACCAGCACCGG
Smad1	CTGAGAGCCATCCTGGGCCA
Smad1	GAAACCATCCACCAGCACGC
Smarca5	GGCCGCGCTCACCTCCATCT
Smarca5	CAGTTACCGACACCGTAGAA
Smarca5	TTTACAGGCTGCATTTGTCA
Smarca5	TAGGACCGTGCCCATAGAAT
Smarcad1	CTAAGAGAAATTGGTGACGA
Smarcad1	GAATCAACAAGCACTATGGA
Smarcad1	AAGGTGGTGGACCCAGGAAA
Smarcad1	GTGGATGTACACAGAAGCCT
Snca	AAAGAGGGAGTCCTCTATGT
Snca	AAAGGCCAAGGAGGGAGTTG
Snca	CAAGAAGGACCAGATGGGCA
Snca	AGTCGCTCAGAAGACAGTGG
Snx25	ATGGATCGTGTTCTGAGAGA
Snx25	TTGTCAAGCAGATTCGCCAG
Snx25	GAGACTGGATATCCTTAGAA
Snx25	GAGCTTGATAAAGTCCTCGT
Sorbs2	TGTTAACGTAACAGACATGG
Sorbs2	GATAATGCTGGAGTTCAGCG
Sorbs2	GAGCGGGATGGAGCTTCCCA
Sorbs2	ACAGACTGTCGACAGGCCAA
Sparcl1	GATTGCCACAGCGGTTCCCA
Sparcl1	TATTACCTCAAATATGGCGG
Sparcl1	AAATGCTGAACCTTCAGATG
Sparcl1	CAGGTGACAGGAGCTGGCGT
Spata4	GGAGTGTTTACCACTGCCGG
Spata4	ACACCACCAGCAGTTCCCGC
Spata4	TAACTGGGCACAGATAGAGA
Spata4	GAACAATTCACTGTAAGGCT
Spata5	TTTCGCCCAGCCGAGCCCGG
Spata5	CCAGTTGCAGGATTTCCTGG
Spata5	ATGTTCAGAGGCCATTCCCT
Spata5	AGTAATAACCCTCTAGGCGC
Spcs3	AAGACAGGAGCGTCCCAGTG
Spcs3	GGTGGTGATGAAGCAGCCGA
Spcs3	GGAGTTCGCGCGCGACAGGA
Spcs3	AACAAGGAAGCACTCACTTG
Spock3	TCTTGCAGCTGCCGCGGCGG
Spock3	GCGTAATGCAAACTTTGTGG
Spock3	TAGGAGGAAGCCATAAGCAA
Spock3	TATGTTCATGGACTTATCGG
Spp1	TTCAGCTGTACTCACCGGGA
Spp1	ATTCAGCTGTACTCACCGGG
Spp1	TGGGTCAGGCACCAGCCATG
Spp1	CATAAGCCAAGCTATCACCT
Spry1	GCAGAGGTTAGACTATGACA
Spry1	CAGCCACCCGGGCAACGCCA
Spry1	TCGGCAGTGCCTCTGCTCCG
Spry1	GCAGGGTAGGCACAAAGACA
Stox2	GCTAGGCCAGGCTCGCCGCA
Stox2	AGACCCGGAGCACAACCTTG
Stox2	TGCGAGAAAGCCTGTCACCC
Stox2	GATCAACCCAGACTTGACGG
Stpg2	TGTATGACCGTGCTCCGCGC
Stpg2	TTTCGGATGGTCCAGGACCT
Stpg2	ATTGTGTTGTCACTAGGAGG
Stpg2	TGAAGCGATAATATTGCAGG
Synpo2	GCAGCCTTTGCAAGTTGCAA
Synpo2	GGTAAGTAAGGTCTGCACAG
Synpo2	GAGGACCAAAGCAATGCCTG
Synpo2	TCAGCCCAACTTCTTTGCCG
Tacr3	CACTGGCAAGCCCAGCGCGG
Tacr3	GGAATAAAGACATTGAGGGA
Tacr3	CCAGAGAGTAATTCCAACGA
Tacr3	CAGGTGGAAATACATCCAGC
Tbc1d9	GACCATGTGGGTGAATCCGG
Tbc1d9	GGAGTCCAATACCACATCGA
Tbc1d9	ACGTCACCACATTTGTAAGA
Tbc1d9	CAGCCTGTGGAACTTCACGA
Tbck	TTTCTCAGAAAGACTGGTGG
Tbck	ACAAGCATGGCATAGTACAC
Tbck	GGAAATCAACATCATCACCA
Tbck	GAGACCATACATCTGATTTG
Tdo2	GGTGTAAACAGAGCCAGCAA
Tdo2	TGATGAATAGGTGCTCGTCA
Tdo2	GAACAGAATCTAGTTCCCAG
Tdo2	TCTGGAAACAATGACTGCTT
Tenm3	GCGCTATACAAACTCGTCCG
Tenm3	TGATGGAGTAACCTCTGTGA
Tenm3	TCGGCGGGCAAAGCAGCCGG
Tenm3	AGATGCCATTGTGTATCCCG
Tifa	TGTATCAGCGTCTTCAAAGG
Tifa	GCAGAAGGAAGACGGAGAGT
Tifa	GAAGGAAGACGGAGAGTCGG
Tifa	AACACAGAATCCCATACCAG
Tigd2	ACTAGGTTTAAGCAGCGCCA
Tigd2	GCAGCGCCACGGTATTCCAA
Tigd2	TCTGGAAATGTCTACCAACG
Tigd2	CAAACACCATAACCAGAGCG
Tigd4	GATGTCAATCTTCTCCTCGA
Tigd4	AGGGTCTATAGATATACCCG
Tigd4	GTGCAAAGACAGGATAACGC
Tigd4	TATGCCCTTGAAACAACGCG
Tktl2	GCCGGTGTAAGCCATTCCAC
Tktl2	GTAGTGGGAAGCAAAGGCCA
Tktl2	AGAAGACGGACCTTCCCAGA
Tktl2	TTATCTGGCAGCCAACACGA
Tll1	TACCCGAGACCACCAACCAC
Tll1	ATGGCATGCCAAAGAAGCGA
Tll1	GAACGGAAAGGATATGGCCT
Tll1	TCTCTCAGTGAACGTCACAC
Tlr2	TGGAGACACAGCTTAAAGGG
Tlr2	CTGGTGACATTCCAAGACGG
Tlr2	GGAGGGAATAGACAGTACTC
Tlr2	TAGAAACAGTCACTATCCGG
Tlr3	TAGGTGGTAATCTTCTGAGT
Tlr3	TTGCTAAGAGCAGTTCTTGG
Tlr3	ATCTACAAAGTTGGGAACGG
Tlr3	TATGAAGAGGAGTTCAAAGG
Tma16	CGGGAGCGGCAGCAGTACGA
Tma16	CATCAAGCAGACCCTGGAGC
Tma16	TCATCAAGCAGACCCTGGAG
Tma16	AAGGCGGCACCATTCCCGGG
Tmem144	AATGCAACAGACCTCACCAC
Tmem144	CAGTATCAAGTTGACCACCA
Tmem144	GATTCCAAGTCCTAAACCGA
Tmem144	AAGCCAATGCTGAATTACGT
Tmem154	GCTGCGTTGGTCTTGGCCCT
Tmem154	AGGATGAGCAGCGCAGCCAG
Tmem154	TATGCAGAGCCTTCTAGCCA
Tmem154	AGAGGACACACCCTCTGTTA
Tmem184c	TATCGGAACCGCGACCAGGA
Tmem184c	GATGGTCCCAATATACAGTG
Tmem184c	GTGGACAGCAGCATAACGGA
Tmem184c	AGGAGTGCTGCAATATACCG
Tmem192	ACTCACGTCCTCCAGCCGGC
Tmem192	AAGGTTCGCTATGATGACCG
Tmem192	TCCACAGGATAAGTTTCCCA
Tmem192	CAGGGAACAGATCAGCTCCA
Tnip3	AGCTTGCATGGAGCACACAG
Tnip3	TCCTGGATGTCAATCAACAA
Tnip3	AAACACTCACACCCTAGTGA
Tnip3	ACTCAGGGAAGTGTAAAGGC
Tram1l1	GAATTCGTGGCTCAACACCG
Tram1l1	GAACGCGATCGACATCTCGG
Tram1l1	GTACAGGGTCCTGGACCCGG
Tram1l1	TAGCACGTACTCCTGAATGG
Trappc11	GGAGTTATGTTGCCGGCCGA
Trappc11	TAGAACACGACCACCAGCGC
Trappc11	ATCACAGGCAAAGTTTGCAA
Trappc11	AAGATGTCATTGCTTCGGAG
Trim2	CGCCAGCATCCCAAGTCCCG
Trim2	GAGAGGGTTAAACTGTGGGC
Trim2	CATGTGTCGGGAGTGCACGG
Trim2	CCATCAGTTAACCAACCAAA
Trim60	AAGAACGGAGTTTCTGCCAG
Trim60	AAGTGGGAGACAAGCCCAGA
Trim60	TGAGGGCTAGCACACACACA
Trim60	AGAAAGCCAGCTCTTATCAC
Triml1	GAGAACACCCAACTAGGCCC
Triml1	GAAGATGCACCAGTTCCTCA
Triml1	AATAGACACCTACCGATCCA
Triml1	ACACAGGCTCAGTTCCGTGA
Triml2	AACACAGAGGATCCAAACTG
Triml2	GAGGTTTAAAGAGATGATCG
Triml2	AAGGCGAGTGAAGTCCGGCT
Triml2	AAACGAGCCGTGTTCTACTG
Trmt10a	TACAGTCGATGACCAGGCGG
Trmt10a	GCACTGGATGAGAGGCTCGG
Trmt10a	CCAAGGATGGGTCAACTGGA
Trmt10a	CAAAGCACAGTACCTTGTGA
Trpc3	GAAGTGCCGGGAGCCCGCGA
Trpc3	GGAGTACGGCAACATCCCTG
Trpc3	GCAATGCAAAGACTTCGTAG
Trpc3	GACCAGACACTTGATAGCGA
Tspan5	ATGTCCGGGAAGCACTACAA
Tspan5	TTGGAATCGGACTGTGGGCG
Tspan5	ACACTGGGTCAAAGCCACCG
Tspan5	GAACCTCATAGACTTCACCC
Ttc29	AGGGCTGTCGAAAGAAGAGG
Ttc29	TAAGCTCCGGGAAGCTGCGA
Ttc29	CAGCTGATCAAAGCTGACGG
Ttc29	TCCATGAACTGACACACGGA
Ucp1	AGATATCATCACCTTCCCGC
Ucp1	GGATTGCCGAAACTGTACAG
Ucp1	TCAGCCGGCTTAATGACTGG
Ucp1	GGTAACATATGACCTCATGA
Ufsp2	TTGGAAGACATACCTTTAGG
Ufsp2	GAACAGCGACGCAAACACGG
Ufsp2	GTTGCTCCAGAGGAATCATG
Ufsp2	TCAGCTCCAAGCCTATCGAA
Ugt8a	GCAAACCTTACTTCTGGCAG
Ugt8a	GGCAACCAAGCCCTAATCCA
Ugt8a	TGTTGCAGGATCTGCAGAGG
Ugt8a	ATCAGAGCCTTCCTAAGCCA
Unc5c	GACCCTCTTACCTTGAGCGG
Unc5c	GAGAGAGTAGATGAAACCTC
Unc5c	AGGCACTACGAAGAGTCGGA
Unc5c	CAAGGACACTTCCTTTCCCA
Usp38	GAAATAATGACCCTTACCTG
Usp38	AGGACTGTGATCATCTGCAG
Usp38	TACATGCTGAGCCAATGGCC
Usp38	AGAGCACCAGGTCTCACGAG
Usp53	GCTTTGCCAAGATTGCCGCT
Usp53	TCTTTGAGAAGCTTACCACA
Usp53	CACGCATCTCTACCTTCCTG
Usp53	AAAGGCACAGTAGTGTCGGC
Vegfc	TCGGAAGCGGAGCCCGACGG
Vegfc	AAATGTACAAGTGCCAGCTG
Vegfc	GAATACCTACCGTCTTGCTG
Vegfc	TTGCCAATCACACTTCCTGC
Wdfy3	GCTCGGTGAAGAGCCGGCGG
Wdfy3	AGAGCTTCAAACAAATCCAC
Wdfy3	CTGTGCACTCACCTGACCAG
Wdfy3	GATGTCAGTGCCTTCCACCC
Wwc2	GAGGAGGCCAGGGACTACGA
Wwc2	TGTAGTAGGCACCAATCTGA
Wwc2	GAAGGAACAGAGGCTGGCGC
Wwc2	ATTGATGAGAAGATGTCCGG
Zfp42	AGGCCGGGAAGAAATGCTGA
Zfp42	TCACATCCTAACCCACGCAA
Zfp42	TCTGCACACACGTGCCGCCG
Zfp42	AAGCATGTGCTTCCTCAGGG
Zfp827	AGAAGGGATGACTTACGTGA
Zfp827	GCGGAGGGAGATTTCAGCGA
Zfp827	GCGGCACATGGTGATTCACA
Zfp827	ACTGTTGGACACATACTCGG
Zgrf1	AGCAGAGCTGTTGAACCGGA
Zgrf1	TTTCCCAGGATTCAGAGCGG
Zgrf1	TGAGCATCGGGCTTCTCAGC
Zgrf1	AGAGGACACAGCTTACAGCG
Hmgb2	CCGCGCCGTCGTCATGGGCA
Hmgb2	CGCGCCGTCGTCATGGGCAA
Hmgb2	CCCATAGACCATGTCTGCAA
Hmgb2	CCCATAGACCATGTCTGCAA
2024-03-01	GTTGATAGATCGGACAGCGG
2024-03-01	GATTACAGAAATCTGGTGGA
2024-03-01	GATCGACTTGCAGATCGCCC
2024-03-01	AGGCAAGCAGCCCAACGACA
Rpl34	TCACCTGTCACGGACACACT
Rpl34	GAGCGCGCCGCCATGTTGTA
Rpl34	GAACGCGGCGCCATCCACAC
Rpl34	GGAGCGGCGGATGTGTAGTG
Rps3a1	CCTTTCAGTGGGCAAGCTCA
Rps3a1	GGGCTGGCTAGGCTGTGCAT
Rps3a1	GCGACAGCGCCCTCGTGTGT
Rps3a1	GGCACAGCCTAGCCAGCCCG
Ube2d3	ACTTACAGGTCCCATAATTG
Ube2d3	GAGAAGGTGCTGTTCCGACA
Ube2d3	GCGAGCCGAGGGGTTCAGGG
Ube2d3	GGTCCACTCGGCCCGAGCGA

## Sheet: Chr5q gRNAs
Mouse Homolog	gRNA Sequences
1700066B19Rik	TTCACAAGTAGAGAAGGCTG				Total gRNAs	2688
1700066B19Rik	AGCCCGTCGCCACCTCGAGG
1700066B19Rik	GCAGCCCGTCGCCACCTCGA
1700066B19Rik	TTTGGGCCTGCACTGCATCA
1700066B19Rik	GTAGACTCAGTAGCCGCCAG
4921536K21Rik	CGTGGAGGCCAAGATCCGGC
4921536K21Rik	GGCTGTCCAGTCTCTCGCGC
4921536K21Rik	AGACCGCTACACAGCCCAGA
4921536K21Rik	GCGCGATTCCCAGAGCACCC
4921536K21Rik	TGAGAAAGATGATTCGCTGG
9530068E07Rik	GCACATTCTGCCCAGGGCGG
9530068E07Rik	AGAGAAGCTGTCTCCCGGGC
9530068E07Rik	AAGGAGAGCAGGCGCTTCAG
9530068E07Rik	GAAATGGCTATCCTCCCTGT
9530068E07Rik	TTTGGACCAGAACGTGAACG
Ablim3	GTCATCCAGTGCTACCGCTG
Ablim3	AGTCCCGGCAGCTATCACAG
Ablim3	AGCAAGCCGATCAAGATCCG
Ablim3	CTGTAGCGTCATCCTCACTG
Ablim3	CTGCCACCAGATGTTCACTG
Acot12	CATGAGCCAGGCCATCCAGC
Acot12	AAACAGAATGTCATCCATGG
Acot12	TAGGGCGTTCAGCACAAGCA
Acot12	ACGTAGAGAAAGCCACGCAG
Acot12	AGAAGGAACGGCCACCACCA
Acsl6	GAAGCAGTCGGAAGAAGTGG
Acsl6	TACCTGAGATGCTAAGCCCA
Acsl6	AGCCAGAGCAACCTTACCAG
Acsl6	GTGGGCACAGAGCAGTTCGT
Acsl6	TCTACGACACCCTGGGCCCA
Actbl2	AGTCAGCTCATCGTCAACCA
Actbl2	GTTGGTCGTCCACGACACCA
Actbl2	TTGGTCGTCCACGACACCAG
Actbl2	TATCCCTCTATGCTTCCGGA
Actbl2	GCAGAAGGAAATTGTAACCT
Adam19	TCTGCAGCTACATTGGCCGC
Adam19	ATGAGTTCATGCTGTAGCGG
Adam19	GCGAGAGCTGATCCTAGACC
Adam19	CCACGTCCCTCACAGTCCCG
Adam19	AAGGGCCCAGTCCTTCGAGG
Adamts19	ATTCTAGAACGTACCTGAGG
Adamts19	GCAAGAGGAACCCAGCGCGG
Adamts19	GCTGTTCACCGCCATCACTG
Adamts19	TTGCAGATAAAGGAAGACCA
Adamts19	GAATGAGCTTTAGCACACGG
Adamts6	AATTTAGACACTGCCTGCTG
Adamts6	GCCTCTAAAGAATACTACAG
Adamts6	GATGTCTTATTCAGCCACCA
Adamts6	TAAGAACTGCATTATCGTGG
Adamts6	AACTTACCCAGTGTTCCACA
Adgrv1	GAAGCGGAAATAAGATTCAC
Adgrv1	GCAGCGTTTATCCCTGCCAG
Adgrv1	TCCAAGTTTCACATTTGCTG
Adgrv1	AGTCACGGTGACCATTCCAT
Adgrv1	ATCACAGTTGCTCTGCCAGG
Adra1b	GTACTGCCGAGTCTACATCG
Adra1b	GATGTAGAAGGAGCCCAGGG
Adra1b	AGGCCCGATGGAGATGACCG
Adra1b	AAGGCGCACAGCTCCACGGG
Adra1b	TCGTGGAACGCAGCCACCCG
Adrb2	CAGGGACAACCTCATCCCTA
Adrb2	GGAGCGGCCACGGACTCCGA
Adrb2	GACAAAGACCATCACCACCA
Adrb2	TAGTCGCTCGAACTTGGCAA
Adrb2	TCAGGAACGGGACGAAGCGT
Afap1l1	GTATCTCAGCGACAGCACCC
Afap1l1	AAAGAGAGACTCCACAAAGC
Afap1l1	CATCGTCCGACATATCCCGA
Afap1l1	GTGAGAGCTGATATACTCGG
Afap1l1	GCAGCTGACGGTCATCAAGG
Aff4	GCGGAATCAGGAAATTCAGC
Aff4	GCGCCAGCAGCAGTGGCCAG
Aff4	GTATGAATAGCCGTTAGAGG
Aff4	CAACAGTCTAACTTTGGCCC
Aff4	TGCCAAGGAGTACACCAGGA
Aggf1	GCTGGCGCAGCTCAGGCGGA
Aggf1	TGAGTACCTGAAATCGCCCA
Aggf1	GACGAGTCACACATAGACAG
Aggf1	GAGCTTGAGAGCTGCAGCGG
Aggf1	TGTATTATGACCCTTCCACG
Ak6	CTTGCAGGGCAGTTATACGA
Ak6	GTTATACGACGGCTACGATG
Ak6	GTTAGAGCATCAGATGCAGG
Ak6	GGTGTGATTGTGGATTACCA
Ak6	TAATGAACCAGAACAGCTCG
Aldh7a1	GGGCTCCGCGAGGATAACGA
Aldh7a1	GGCTTTCTTGGCTTTCCCGA
Aldh7a1	TAGTTGGATCTTCTCCCGGA
Aldh7a1	ACTCCAGCCTTACTTTCAGA
Aldh7a1	GGAGAATGACAGCTTACCAA
Ankdd1b	ACAGCAGCTGCAGGACATGA
Ankdd1b	ACAGCCCTGCACTTTGCCGT
Ankdd1b	CCAGGCACACCTCATTGGGC
Ankdd1b	TGGGAACACGGCCTTGCACC
Ankdd1b	AGTCGCGTGCTCCTGGCAGG
Ankhd1	GGAGTCCAAATCCTCCTCAA
Ankhd1	AGGAGCAGATTTGCGCACAG
Ankhd1	GCAGAGAACACACACAGTAC
Ankhd1	TTGATGGCAGCTTCTAGTGG
Ankhd1	TAAGGCAGTGTGCATCTCAT
Ankra2	AGCAGCCCAGGGCGTCGCCA
Ankra2	ACTTTAACCAACAAGCACAG
Ankra2	CAGGTAGAGCATCTCTCCCT
Ankra2	TGTGCCGCAGCCCACATCAG
Ankra2	GAAGTGCGTGAAGATGCTGT
Ankrd34b	ATTTCCGAAGGCGTGGCCGG
Ankrd34b	AATTTCCGAAGGCGTGGCCG
Ankrd34b	GGGACCCAGACTCTCCTCCG
Ankrd34b	GCTATCACAGGCTTCCTCGG
Ankrd34b	GCTCCAAGATATCACTCCAG
Ankrd55	TCTGTGTTTGATCAGCACAA
Ankrd55	ACTGTCACAACACTCCAGGA
Ankrd55	GGGTGCCAACATTAACACAC
Ankrd55	TCTGCAGTGGCAGCGTGCAG
Ankrd55	GATCAACCATCAAGACACAG
Anxa6	ACAGCCATGAAGGGCTTCGG
Anxa6	CCTCCCGCAGCAACAAGCAG
Anxa6	TTGGCGTCACAATAGGCAAG
Anxa6	TGAGCAGATGCACCAGCTGG
Anxa6	CCACTTCCAGAAGATGCTGG
Ap3b1	AAGAGGCCGAAGGCGCCCGA
Ap3b1	AACCCTGCAGATGATTGCGA
Ap3b1	CATGATGCTGGCTATTAAGG
Ap3b1	ACTCTTCAACATCAACCAGC
Ap3b1	CAGGAAGAAGTCGTATGCCA
Ap3s1	TGGTAGAACTTGGAGAGCCG
Ap3s1	ACACGCAACAGCAAATCATC
Ap3s1	CACGCAACAGCAAATCATCA
Ap3s1	CATCGCGCTTAGACACCAAA
Ap3s1	GTACTTACAATCCTCCTTCT
Apc	GAAGTACTTAAGCAGCTACA
Apc	TTGAGCGTAGTTTCACTCCG
Apc	GGACATGGAGAAGCGTGCAC
Apc	GAAGCTGGCCGGCAGCACGA
Apc	GAAGGTTGACAAGTCATCTG
Arap3	AGTATGCGGACACTTTCCGA
Arap3	TGTTGTGGGCCTGAAGGCAG
Arap3	GTACTACGGTGTCCAGCCTG
Arap3	ACAGGATCTGGAGACACGGG
Arap3	AATGTACTTTGGCAGTGACA
Arhgap26	GACGCTCAAGTCACACGAAG
Arhgap26	AATTCTTGCAAAGATCTCGC
Arhgap26	CGAGGTGCTCATCACACCCT
Arhgap26	GAAGGAATCCCAGCTACAGG
Arhgap26	TTTGCAGGCAGACAGCCAAG
Arhgef28	TTTATGGCGGGTCGCATCAG
Arhgef28	GCAGGCCATGTTGTCCACGT
Arhgef28	GAAGTGGAATAGCTTAGGGA
Arhgef28	TGAATGAACAAACTGCAGAG
Arhgef28	TCAGTTTCTGCAGCTCCAGA
Arhgef37	TGTGTCAATGAGCTCTCTGA
Arhgef37	AGGATGTCCAGATCGCCTGG
Arhgef37	GCTGGTCAAGGCGTACCAGA
Arhgef37	TATTGCCGTTCACATCCTGG
Arhgef37	AAGGCTCAGCTGCTCCACTT
Arl14epl	GAAGAACAACTCCACTCAAC
Arl14epl	AATCTGCCACCTGAGGTCCA
Arl14epl	GTGCCGCTGCAACCGCCGCT
Arl14epl	AGACCCAGCGGCGGTTGCAG
Arl14epl	CGATGGCATCATAGACCCAG
Arl15	GCTGCCGGATGTCTGATCTC
Arl15	AAGTCATATTCAGGGCGCGC
Arl15	GCAGAGCTCGGACAGCAGGC
Arl15	AAGGGTAAAGTGCATAGCTG
Arl15	GAACTTGAACCACTGGCCCG
Arrdc3	GAGGACATGCGAAAGTACGG
Arrdc3	TCCACACTATTCATTCAGGA
Arrdc3	AAGCCGAATTGCATAGGCCT
Arrdc3	AGGATGGAGGGTGAAACCGG
Arrdc3	GGTGTACGTGGATATTCCTG
Arsb	AGCACGAAGACCACATGCGG
Arsb	TGGTCGGGAAATGGCACCTG
Arsb	GGAAGCCTTACTTTCTCCGG
Arsb	ACGGTCTTCATCTTCTCCAC
Arsb	AATGGAACCAAACCTCTGGA
Arsi	GGCTGCGGTGGAGCCACCGA
Arsi	ATAATGTGTGGAGGCTGCGG
Arsi	GGGTCTCGATATCCGAGCCA
Arsi	TGGTGGCCAGACCTTCTCAG
Arsi	AGAGCTAGAAGTTTCTCCCG
Arsk	ACTGGCGACCAGCACCACGT
Arsk	GGAAGACTAACATTTCAACC
Arsk	ATTCTGTCAAGTGAGTGAAG
Arsk	TAGAAGGAGAGTGATGACCA
Arsk	TTTGTCACAAATGCACCCTG
Atg10	CATTCACAGCAGATAGGCGA
Atg10	AGGGAGACATGTGAGCACAC
Atg10	GGAGAATTTAGAGCTACCAA
Atg10	TATAAGCCGAGGCTGCTCCA
Atg10	GGTAAATTCAGACCAACCAC
Atg12	TCCGGGCGAAACTGCAGCCG
Atg12	GAAACTGCAGCCGAGGACGG
Atg12	TCATCATACCAACTGTTCCG
Atg12	TAAAGTTGACATCCTGCTGA
Atg12	ATTACTGCAAATCCCAGGCA
Atox1	AGAGTCCTCAACAAGCTGGG
Atox1	GCCCTCACAGGTCATGTCCA
Atox1	GCAGAAGCACGAGTTCTCCG
Atox1	GGAAAGGCTGTTTCCTACCT
Atox1	GCACAGCTCAGACACCCTGC
Atp10b	GCCACAACACAGCAGAGCAG
Atp10b	GAAATATGGTGATTTCCCTG
Atp10b	GAGAGACCAACCTCAAGCAG
Atp10b	AGCGAGAGTCTTCTGCTCCG
Atp10b	TTTGACGTGCCAGATGCCGA
Atp6ap1l	AAAGAAGTGGTTGTACGGAA
Atp6ap1l	CGACAGCCATACCTGTGCAA
Atp6ap1l	TGATGGCTGAACGTACTCCA
Atp6ap1l	TGGTGATGATGAAGATCCCA
Atp6ap1l	AACGGGTCAGCAGCCTGCGG
B230219D22Rik	ACACACTTGCAGCCTACCAG
B230219D22Rik	GCTGACTTGGTAGTTCCCGA
B230219D22Rik	GCAGGATACAAAGTCAGCCC
B230219D22Rik	AGAGCTTTAATGCTACCTGG
B230219D22Rik	CATAGCCAAGATCTGCAAGG
Bdp1	GTGCCTGCAGTGGATTCCGG
Bdp1	GCTGGAGTAGGGTTTGGCTG
Bdp1	TAAGATGCTCACTCTCTCGT
Bdp1	TAATGAAGACGTGGAAGAGG
Bdp1	AGAACTACTACTCAAAGCCA
Bhmt2	TTGGCTCGAGTGCTTCCAGC
Bhmt2	AAAGAGAGGCTTCGTGAAGG
Bhmt2	TCACACAGAATTCTTGAGAG
Bhmt2	TGTGGACTTCTTGATTGCAG
Bhmt2	GACCATGTGCATCGGCCCAG
Bhmt	GCCGTGGAGCATCCTGAGGC
Bhmt	AGCTGCCGTGGAGCATCCTG
Bhmt	ACCATGTGCATTGGGCCCGA
Bhmt	TACCATGTGCATTGGGCCCG
Bhmt	ACTGACCTTGCTCTGATCCA
Brd8	GTACTGGCCCAACAGAGCCA
Brd8	AGGCCGGCCAGGTTCTGCAA
Brd8	GAAAGTCATAAAGGAGACAC
Brd8	GATGCAGAACTAATCCAAGC
Brd8	ACCCTGGTACGCAGCATCGG
C1qtnf2	TGCTCGCAGGGACTTCCAGA
C1qtnf2	GATGGCCAGGACGGAGACCG
C1qtnf2	ATGGCCAGGACGGAGACCGG
C1qtnf2	AGGACCAAAGGGCAAAGCTG
C1qtnf2	CGGTGTGCCATGCTTCCCGG
C330018D20Rik	ATTTCTCAAGAGTCCAAAGG
C330018D20Rik	AGGAGGATTTGGCAATCTGC
C330018D20Rik	TCTCCAGCCGTATAAAGACA
C330018D20Rik	TCTTTAGCTTCATCACACAG
C330018D20Rik	TTGGCCATTCAAATGGAAGA
Camk2a	ACTCCATGACAGCATCTCCG
Camk2a	TGTGCTACACTGTCACCAGA
Camk2a	CTTTGGCCTGGCCATAGAGG
Camk2a	GGACCCGTACGGGAAGCCCG
Camk2a	TAAAGGCTCACCGAGATCCA
Camk4	TCTGGGCGATTTCTTCGAGG
Camk4	AAGGACCAGGCTGATTTCTG
Camk4	GTTGTTCTGACTTACAGCAA
Camk4	TCTCTGGTTTGAGGTCACGA
Camk4	GAAGACAGTGTGTGGAACCC
Caml	GGAAAGACCCGCGACGCCGT
Caml	TGAGAAGCCGACAGGCCCGA
Caml	GGAGGAGCTGACCAGCTCGG
Caml	GCAAGCTGCAAAGTGAGAAA
Caml	GCTGTCTGGGATTCCCGCTG
Cartpt	CCTGGACATCTACTCTGCCG
Cartpt	TGGGCACGGGCACCCAGCAA
Cartpt	GGAACCCGGAGCCTTACCAT
Cartpt	TTCGATCTGCAACATAGCGC
Cartpt	GAATTGCAGGAAGTTCCTCG
Cast	GTGGCAGCTTCACCAACATG
Cast	GATGACCTGATAGACACCTT
Cast	ATGACAAGGCATCTATAGCC
Cast	GCTTGGCTAACGTGGCTCGG
Cast	ACACATCCCAAACTCCTCCG
Catsper3	GTGCCAGGCTTACTTCAGGA
Catsper3	GGATGCCATCAGCAAAGTGG
Catsper3	GCAGACACTCATCATCGCTG
Catsper3	TGTGATGATCATGCACACGG
Catsper3	GAGGAACCTTGCGATTATGG
Ccdc112	GGCGGCAACAGCAGTCGCCG
Ccdc112	GGCGGCTGTAGTGCTTCAGG
Ccdc112	TGGGCTTCACATCTTTCAGC
Ccdc112	GAGGATCGAGTCCTGGGCGC
Ccdc112	TGGAGAGCTACACCCAGCAG
Ccdc125	ACAGAGGATGACATGACCGA
Ccdc125	ACCACGAGGACATACCTCTA
Ccdc125	TCAACTTCAGATTCTCTCTG
Ccdc125	CTTGATATCAAGCATGGCGA
Ccdc125	CTGAAGAACCAGTTTCCGAG
Ccdc69	AGGCAAAGCCGGCACAGCCG
Ccdc69	GACACAGACAGAACTCCTGG
Ccdc69	AGAGGCCAAAGCCTCGTTGC
Ccdc69	TGCAAGTCATGTCTCACCAC
Ccdc69	CACTGACCAGCATCTCCAGG
Ccnb1	TGACGTAGACGCAGATGATG
Ccnb1	GTGACGTAGACGCAGATGAT
Ccnb1	CACCATGTCGTAGTCCAGCA
Ccnb1	GACTCACCATGTGCTTTGTG
Ccnb1	AAGCAGGGAGTCTTCACTGT
Ccng1	GTCCAGTAAATTCACAGCTA
Ccng1	AGAGGAAAGGAATGTCCCAC
Ccng1	GCAGTGGCAGGCCTTAAGTT
Ccng1	GGCGCTATCTATCCTTGCGT
Ccng1	GGAAACAAGCTCTTGCCAGA
Ccnh	CAGCTGCTCCTCGCTAGCGA
Ccnh	TGTTTAAACCAGCTATGCCA
Ccnh	CAGTAATGGAATATCACCCT
Ccnh	TCTTGGACAGGAGAGGGCAC
Ccnh	AATCTCCGGATTCTCCAACA
Ccnjl	GTGGGAAGGGCGCGTCGCCT
Ccnjl	ATGGCCAGGTGCCGGGCCGA
Ccnjl	AAAGACCAAAGAGTGCCTCA
Ccnjl	ACTGGACCAGAGACTTGCAG
Ccnjl	TGGGCTAGAGTTGTTGGCGG
Ccno	GCAGCGGCTTCTTTCTCCGG
Ccno	GAGCTGCTACGACTTCCGAA
Ccno	AAGAGAGGCCGAACTGGCGG
Ccno	GAAGCAGTCTGCAGCAACAG
Ccno	GAGGCTCAAACCCTGGCCCG
Cd14	GAAGACGCGGACCTGTTCGC
Cd14	TTGCCCACGACACGTTGCGG
Cd14	GATGTTGAGATCGGGTCCGG
Cd14	GATGTGGAATTGTACGGCGG
Cd14	GCAGATGTGGAATTGTACGG
Cd180	TCGGCAACTGGCCAAGAAGA
Cd180	ACATTGCAGGAATAGAGCTG
Cd180	ATGGAAAGGTGAGTAAGGGA
Cd180	AATCTAGGAGTTCTAGCTGA
Cd180	AAATCTAGGAGTTCTAGCTG
Cd74	GGTTAGAGATGAGGTCGCGT
Cd74	ATTTCGGAAGCTTCATGCGA
Cd74	GACATTGGACGCATCAGCAA
Cd74	CAAGTACGGCAACATGACCC
Cd74	GAAGCATCTTAAGAACTCCA
Cdc20b	AACTGCAACGCACCGCCCGG
Cdc20b	TCCAAAGGAGAACATCATGC
Cdc20b	ATGGCAGCTAAGCCCAGCCA
Cdc20b	TTGCAAGACACCTCTTGCAG
Cdc20b	AAGGGAGCTCAGCAAATCGA
Cdc23	AAAGCAGCTGCTGCTCATCG
Cdc23	TATGTGGTGTTCCAGGTCTG
Cdc23	ATCAAAGTAGGCCTTGGCCA
Cdc23	GACGAAACAGTTGATAGCCT
Cdc23	AGCCGGAAGCACCAGGCTCG
Cdc25c	GAAAGACAAACTCCACGACT
Cdc25c	GACCTTTCGAATCTTAGCAG
Cdc25c	CCAGTTAACTGTCTATCCAG
Cdc25c	TTTCACCAGGACCTTATGAA
Cdc25c	AAGGATTTCAGAAGACCCAA
Cdc42se2	GGATCCGGAGACCTATTTAG
Cdc42se2	TTTGTGCACACAGCTCACGT
Cdc42se2	CACGAGCTGCATCTGCACGT
Cdc42se2	TCCAAGGGAGGCTATGGAGG
Cdc42se2	TCAGAACCAGATGCAGTCCA
Cdk7	GAAACTGGACTTCCTCGGAG
Cdk7	TGCGACGGTCTATAAGGCCA
Cdk7	AGGAATCCTATCTTACCTCG
Cdk7	CTAGCTCCAAACAATAACTC
Cdk7	GTACACCAACTGAAGAGCAG
Cdkl3	ATGGAGATGTATGAAACCCT
Cdkl3	GAGCTGCAGCACTACTGTCA
Cdkl3	TCTCAGGCTTTATATCTCGA
Cdkl3	ATGATCATTGAAATGGCCAC
Cdkl3	GTAGATGATGTCCTCTCAGC
Cdkn2aipnl	GGAAACTAGCTTCTCCACCG
Cdkn2aipnl	GACTACCGAGACCCACCCGA
Cdkn2aipnl	GAGGTGGTTGGCCCAGACCA
Cdkn2aipnl	AAGGTGATGGAAATGGCTGA
Cdkn2aipnl	AATGGCTGATGGGATTGAAG
Cdo1	GATGCGGATGAGGTCCGCCA
Cdo1	AATCTGATGATTCTGTGCTG
Cdo1	AGAAGTCTGAAAGAACCCTG
Cdo1	AAAGGCGTGGCATGTATCGA
Cdo1	GGGTCACTGGAGAACAACTA
Cdx1	GGCACCGGGCTAAAGTCCGG
Cdx1	AAGGGCGCAGCCCAGGTCGG
Cdx1	TATCCGGCGCAAGTCCGAGC
Cdx1	AACCAAGGACAAGTACCGTG
Cdx1	GTAGGGCATAGACTTCCTAG
Cenph	GTCCTCGATACGCTCCTCCG
Cenph	GAGGCCTGCGAAGAGAAGCG
Cenph	CCGGCCTCAGACCTCTCCCG
Cenph	GTTAATAATGAAGTCCCAGG
Cenph	GAAAGAGGATGTTGACAAGA
Cenpk	ATCCTGTACCACTTCTCCGT
Cenpk	GAACTGACAACTAAGATCCG
Cenpk	GGAGAAGCTCTTGCTTACCT
Cenpk	GGAGTACTTGCTTCAGGCAG
Cenpk	ATTGAGCTACTTCTGCGTTA
Cep120	ATCGTCGTATCCATCCTCGA
Cep120	GGTGGAAGCAAAGTTTGATG
Cep120	GGACCCGCAGACTTCTGCCA
Cep120	ATACACCAAGTTCAAGGCCG
Cep120	CCTGGCAGGAGTTGACCCGA
Cetn3	AGAGAATGAGTTTAGCTCTG
Cetn3	AAAGGTGGCAATGAGAGCCT
Cetn3	GATTATGACAGAGAAGCCAC
Cetn3	GGAGCTCCGGGCCATGATAG
Cetn3	GAGTTTGACAAAGACGGCGA
Chd1	GAAAGTGTTAGAAATGGCAG
Chd1	TGTGGGTCAGCATCAGGCTC
Chd1	TCTGGACAGCCAGAATACTG
Chd1	GACTCCGACGACTCGTCCAG
Chd1	GAAGCCGAAAGCCTCAGAAT
Chsy3	AGGCGAGGACACACGCCCGA
Chsy3	ATGACAGGCAAAGGTGGCGG
Chsy3	TCAGCAGAGAGGTTCTCAGG
Chsy3	GTGTGGTGTACATCTCTCGG
Chsy3	TCATGAGAGCGCTCTCCCGG
Ckmt2	AAGCCGGGAGGACTCACCTT
Ckmt2	AGTTTGGATGCACTGGTCCA
Ckmt2	TAGGATGCTTCATCACCCTA
Ckmt2	CTGGAGGCAGGCTCAGCCCG
Ckmt2	CGTGACTGGCCTGATGCCAG
Clint1	GCAACGAATGATGATCCCTG
Clint1	TCTATTGCTCACCTACAAAG
Clint1	GAACAAAGACAAGTATGTCG
Clint1	ACACCATCAGCAAGTTCCGG
Clint1	AGCAGCAGCACATTACACGG
Cmya5	GCGATGGAGAGCGGCGACAG
Cmya5	TGAGCCCATAGTTCACAGAG
Cmya5	CTTGAGTCCATAGTCCACAG
Cmya5	TGTGCCCATAGTCCACAGAG
Cmya5	GAACGAGGAAATGATGAAGA
Cnot8	TGTAGCTGAGGACAATCTCA
Cnot8	TCGGCCGTACAACAACACCT
Cnot8	GCAGTTCCAGAAACACGAGG
Cnot8	ACTCGTGTTCTTCTTCCGGC
Cnot8	ACTGATCAGCCACCTCCTGA
Col4a3bp	GAACTCGTCGGGCTCGGAGG
Col4a3bp	ACCCGGAGCACAGACAGCAA
Col4a3bp	TCGGGACATCCTGTGCCGGC
Col4a3bp	GGAAGCGTACAAGAATGTGA
Col4a3bp	GAATCTGTGAACATCGTCAG
Commd10	CAGAAATGCAAACCTTCAGG
Commd10	AGAGAAACAAGAACTTCACC
Commd10	GAGGGCCCAGGATTCTCTGG
Commd10	AGTGAGCAAGGAAGACGCCA
Commd10	GAACGTGGAGAAAGTTCTCG
Crhbp	GATGGCTCACCTCTAGGTAG
Crhbp	CAGAGGAGCAGCCGTACCGA
Crhbp	AAGGCGGCGCAGTGCAGCTG
Crhbp	GTGGACCCGGAAGAAGACCA
Crhbp	AAGGCCATGCAAGTGTCCGA
Csf1r	GATGGTGGTACTGCCTGCCA
Csf1r	CGGATAATGAACCCTCGCCA
Csf1r	TTCAACGTTATCCTCAAACG
Csf1r	GCTGTGGACTTCCAAGACGC
Csf1r	TGAGCAGAGCCTCTTGCAGG
Csf2	TGACAGGCATGTCATCCAGG
Csf2	ACAGTGATGGGTGAGCGGGT
Csf2	AGAGAAGCAGCTTACCTTGA
Csf2	GGGCAATTTCACCAAACTCA
Csf2	GCTGTCTATGAAATCCGCAT
Csnk1a1	CTAGCGATCAACATCACCAA
Csnk1a1	GATCAACATCACCAATGGCG
Csnk1a1	AGTGAAACTAGAATCCCAGA
Csnk1a1	TTAATAGAACCAGTCTGCCG
Csnk1a1	GGCCTGCTGACCCTGCCCAC
Csnk1g3	GATAGAATGGCACGGCCCAG
Csnk1g3	TATAAGCAGTTAGGATCTGG
Csnk1g3	TTGTGGTAAATACAACGCGA
Csnk1g3	ATTACCTTTAAGCCTTGCCA
Csnk1g3	CATTCGACCGTCCTGCCGTG
Ctnna1	GAAATGACTGCCGTCCACGC
Ctnna1	AGAGAGCCAGTTTCTCAAGG
Ctnna1	GAAGCGAGGCAACATGGTCC
Ctnna1	GCTGGCAATGAACAAGACTT
Ctnna1	GATGATGCTGCCCAGCACCA
Ctxn3	ATAATCTGATCCGTTCCCAA
Ctxn3	TATAATCTGATCCGTTCCCA
Ctxn3	GGAGCATGCCAACCTCAACA
Ctxn3	GAGCATGCCAACCTCAACAT
Ctxn3	AAGCCCATCAGCCCATGTTG
Cwc27	GATGAGTAACATCTACATCC
Cwc27	GTCCAAGGTGGAGATCCCAC
Cwc27	ATGTGGACCAGCATTTGCCA
Cwc27	GCTGGGACAGAGCTTAGATG
Cwc27	AGAAGAAGCCGGCAAGCCGA
Cxcl14	GCACTCACCGTCCACGCGCG
Cxcl14	CTTCCGGGAACACTTACACT
Cxcl14	CAAGTGTAAGTGTTCCCGGA
Cxcl14	ATGCCTGGAACGAGAAGCGC
Cxcl14	GCAGGCAGTGCTCCTGGCCC
Cxxc5	ACCATGTCGAGCCTCGGCGG
Cxxc5	AAGAAGAAGCGGAAACGCTG
Cxxc5	GCATGTGTGCGCCCTGCCGG
Cxxc5	AAATCACTGAAACCACCGGA
Cxxc5	ACTGAAATCACTGAAACCAC
Cyfip2	TACATGATGGAGGATGGCGG
Cyfip2	AAGGTACATTGAGCAGGCAA
Cyfip2	TCAGAATGAAATGCTGGAGG
Cyfip2	CGAGATCTACGAGAAGACGG
Cyfip2	GGCTGTGTCACGCTGAGCGC
Cystm1	ACTGTGGGTATCCTTGATAG
Cystm1	TATCAAGGATACCCACAGTA
Cystm1	AAGGATACCCACAGTACGGC
Cystm1	ACGGGAAAGGAAGACGAACA
Cystm1	GCAGAGCGCAGCCCAGCACG
D1Ertd622e	TCAGCACCTGACCCTCCGAG
D1Ertd622e	TCAGCCATATGAGATCCCAG
D1Ertd622e	TAGCCCAGAAGTGCACAGGA
D1Ertd622e	CTTCAGGAGTTCCTCACCAG
D1Ertd622e	GACCACCCTGCCCTTGCCTG
Dcp2	CATTATGGAGCCCAAACGCC
Dcp2	AAGTCTCTTATCCCGCACTG
Dcp2	TACCTGGCAAAGTCAGGCTG
Dcp2	TGATGTACAAGCGAGCAAGC
Dcp2	ATGACAGGGCAATTTCTCAA
Dctn4	AACCCGCTCCGACTGCAGCA
Dctn4	AAAGCCTATTACTTGGCCTG
Dctn4	GAGATCGCAAGAAGCTGGCA
Dctn4	CGGCCAGTGAACCTAACAGA
Dctn4	TAAGAGGCGCTGCTGAAGGG
Ddx46	ACAAGAGAAGATCTCGGTCA
Ddx46	CGCTCAAGGAGTCGAAGCCG
Ddx46	AGAGCAGCGTAAGAAGGCTA
Ddx46	AACATGAGGAGCGTGAAAGG
Ddx46	GGAGAATGACCAGGACGCCA
Ddx4	CTTCCTAAACTTCTTCCAGA
Ddx4	GAGAACACATCTACAACTGG
Ddx4	TTTGAAGAAGGTGATAGCTC
Ddx4	GATAATCAGACTCGAAGCAG
Ddx4	GTTGGTGCAGGCTGCCAAGA
Depdc1b	ACTCTCACTCACCAGCCTGG
Depdc1b	GCATTGCTTCACTGCATCGG
Depdc1b	TTCTCCTGTGAAGTGCCCGG
Depdc1b	CCTCGGTCAGCTGTCTGCGG
Depdc1b	TCTTGGCCTGGATTCCTTGG
Dhfr	CCCGGCCAATACCTGAGCGG
Dhfr	AATGACCACAACCTCTTCAG
Dhfr	AGGTCGATTCTTCTCAGGAA
Dhfr	AACCTCAGAGAACCACCACG
Dhfr	TTGTCACAAAGAGTCTGAGG
Dhx29	AAATAAGAAACACAAGGCGC
Dhx29	AATTCTGCAAATGATTCCGG
Dhx29	CTCTGCTTAAATCTTTCCGA
Dhx29	AAAGGAAGAGACAACCGTGG
Dhx29	TACGGCAACTTTCTCAAAGG
Dimt1	GCTGCTCCTGACGATCCCGC
Dimt1	TCAGGACTCATGTTCAACAC
Dimt1	TTGCCTGTGAACTTGATCCA
Dimt1	ATTTCAGTACATCTCCCACC
Dimt1	TGACAAACGGGCCCGTTCCA
Dmgdh	CGGGTACTCACCCTTCCCGG
Dmgdh	GAGAAGTCGGAGCTCACCGC
Dmgdh	ACAGCATCAAACTTTACGAG
Dmgdh	GCGAACCAACTGGCACGCCA
Dmgdh	TTAGCCGGACTGTATAACCC
Dmxl1	CGGCGAAGCAGTGGTCGCCG
Dmxl1	GAAAGATTACAGATCATCCC
Dmxl1	AACAGAGATAACGTTCCCAT
Dmxl1	AATATAACCTGGGATCCCGC
Dmxl1	ACACCAAAGCTGCAAACAGC
Dnajc18	ATGGCGACCACTCTGGGCAG
Dnajc18	AGAATGAGTGGAATCAGACG
Dnajc18	GGAGCAACAGAGGCCTTCAA
Dnajc18	TAATGATAAGATCTGGCTCG
Dnajc18	ACGACAGTCAGTATTATCGC
Dnd1	AAAGAGCTATGCAGTCCAAA
Dnd1	ACGGGCAAAGGAAGTATGGA
Dnd1	AAGGGAGACTGGCATCCGCC
Dnd1	AGCGCGCATAGGCAAAGCCG
Dnd1	GTTGGCTGACATCTGGCCTG
Dpysl3	GGCGGACTCACCGTGATCCG
Dpysl3	GACCGTCTTCTAATCAAGGG
Dpysl3	TTACAAGGGAATGACCACAG
Dpysl3	GAATGACAGCGTCAAGCAGG
Dpysl3	GTAGGCCATGTAAACCATGA
Dtwd2	GACGAAGAGGAGCGGACCGA
Dtwd2	AAGTGGGTAGAGATCTGGAG
Dtwd2	ACCGCTCTTCACTGAAGCGG
Dtwd2	TGGTACATGGAGCCAGGCTA
Dtwd2	AAACAGGTGCCTTTCTACCC
Ebf1	GGTGCTGGACGCCAACACAG
Ebf1	CGACAGACAGGGCCAGCCCG
Ebf1	AGAGGAGCTGGAGCCGGTAG
Ebf1	CAGGAAACCCACGTGACATG
Ebf1	TAAGAGGGCGTACCTTCCGA
Ecscr	TTGCCCATCAACTCCCACAG
Ecscr	TACGACAACTCAGACCTCGC
Ecscr	GACACCAAGGTCAAGCACCA
Ecscr	CCACTGCCATCTCTCACCAA
Ecscr	GGATGATCACTACAACCACC
Edil3	TTTGGTTGGACTCAGCCTCG
Edil3	GAGTGTCCAGAAGGCTTCGC
Edil3	CCTAACCCATGCCATAACGG
Edil3	AGAGTAGTTAGCAACAAGGT
Edil3	TCTGGGCCATTGGGAATCGA
Efna5	TCGGCGACGACTTTGGAGCC
Efna5	GCTAGGCGTGATGTTGCACG
Efna5	GGACAGAGTCCTCATAGTGA
Efna5	CTGTTTCCAACAGATTCCAG
Efna5	GAGTCAGCCGAGCCATCCCG
Egr1	AACGGGTCAGAGATCTGCAG
Egr1	GAGTGAGGAAAGGAGCCGAA
Egr1	GAGATGATGCTGCTGAGCAA
Egr1	AGAGAGTGAAGAGGCAGCCG
Egr1	GACGGGAAGCCACTGTGCGC
Eif4ebp3	AATTGGGCAACTCGTGGACG
Eif4ebp3	TGCCGGGACCAGCTGCCAGA
Eif4ebp3	GTGGCGTATAGTGTGCCGCC
Eif4ebp3	CTACGACAGAAAGTTCCTGC
Eif4ebp3	AGCAACTCCAACTTGGAGGG
Ell2	GGAGGAGCAGCGGTACGGGC
Ell2	AGACCTTCAATTCAGTTCCA
Ell2	GTGGGAAGAGATAATCCTCA
Ell2	GACGCGAGAAAGAATGACCC
Ell2	TCAGAGGCCATACAGGGACA
Elovl7	TCTGCCACAAACCATCATCC
Elovl7	AGGATGATGGTTTGTGGCAG
Elovl7	GGAGAAGTAATAAAGCCAGC
Elovl7	TCCATCATACGATCATGCCG
Elovl7	TTTGGGCAACCTCTGACCCT
Emb	TGCGCTCGCACACTGGCCTG
Emb	GAGCTGTAATATCTCAGTGA
Emb	GAAGTCACCCGTAGTCTCAA
Emb	AGAGGGACCTTTAACATCCA
Emb	AAGTCGTTGATCGCTTACGT
Enc1	ACGCAGCCAGCACTGCCCGG
Enc1	TGAAAGTCTGCCCTCCCAGG
Enc1	AGGCTGACATTCCCAGCCCG
Enc1	GAGCCACGACAAGCTGCCCA
Enc1	TCAATAGTGAGACTTACCAG
Erap1	GTAATGGAGACTCATTCCCT
Erap1	TCAAGATAAAGAGGGATCCA
Erap1	GAAGATGAGTACCTACCTAG
Erap1	AAATCAAGCCGATTATGCTC
Erap1	GCAATCCCAGACTTTCAGTC
Ercc8	GTAGAGCGCAGTCCACACGG
Ercc8	GTTAAACAAAGACAGGGATG
Ercc8	ATAGAGTACAACCACGCCAT
Ercc8	ACAGCGTGGAGACTGTTCAG
Ercc8	AGTTGGAACAAGAGGACCCA
Esm1	CTGGAGCGCCAAATATGCGG
Esm1	GAAGCAGCCTGCGTTGCAAG
Esm1	TCCCTATGGCACCTTCGGGA
Esm1	CAGCAGCCAAATCTCCCAGC
Esm1	AATCTCAGCCAGGATCAGCG
Etf1	AAGAGCTTGGAGGCGGCCCG
Etf1	TGGCTCCGAGGACTGAAAGG
Etf1	AATGGTCTGGTTGTTTACTG
Etf1	AGTCCTGCACAAATTCACTG
Etf1	CTCTTGAATGAACTTCACGT
F2r	GGGACGCGGGAAGACAGCAA
F2r	AAGACAGCAAGGGACCGCAC
F2r	GCGACGATCAGCAAGCGCCG
F2r	GATGAAGATGCAGAACACCG
F2r	GAACACAATCGTGTACACGG
F2rl1	CCGGACCGAGAACCTTGCAC
F2rl1	AGGAGACCGAGGCCGCCAGA
F2rl1	GGGAGGTATCACCCTTCTGG
F2rl1	AAGAAGGCAAACATCGCCGT
F2rl1	GGACGCAGAGAACTCATCGA
F2rl2	AAGGACCAAATCCATCAGTC
F2rl2	GTGAAAGATGACCAGACTGA
F2rl2	AAGATCGCCTACCATCTCAA
F2rl2	GGTCACGTGCCGGATCACCA
F2rl2	GACGAAGTAGTAGAATCGGA
Fabp6	GATGAGTTCATGAAGCGCCT
Fabp6	ATATTTGCCACTGAAGGCCA
Fabp6	AGAATGTGAAATGCAGACCA
Fabp6	CGTGGGTGACAAGTTGGTGG
Fabp6	TGAGCGCGTAAGCAAGAGGC
Fam114a2	GAAGCTACTCCGGTTACCAC
Fam114a2	GCTCTCCTCAGCCTCAGCTA
Fam114a2	AGAAGGCAGAGACTTCTCTT
Fam114a2	TGAGAATGGAAGCTTACTAG
Fam114a2	TAGGGCAAGAGCGTTATCAG
Fam13b	GAGTTGCAGTTACTCAAGGA
Fam13b	CTTCGGCAGAGATACGACAG
Fam13b	CAGGTGGAAGCTGTTGCAAG
Fam13b	AATTGTGAGCAGGATAATGG
Fam13b	AAAGTCAGCTGGCATGCCAG
Fam151b	GGTTGGCTGCGTGGGACCAG
Fam151b	GAGCAACAAGGGCATCAAGT
Fam151b	AAATGGGAGCAGCAAAGTAG
Fam151b	TTGGTCGATGGTGAAAGAGA
Fam151b	AGAATGGCCTCGAATTCCAA
Fam169a	AGTTATCCAGCAAATCCACA
Fam169a	TCTGATTGCCGCCATAGAGA
Fam169a	TGGCCCACCACTGACCAACA
Fam169a	GCTGTACCAGAACATGAACC
Fam169a	ACCTTCAGAAGTGCTAGCAA
Fam170a	GTGCCCAAAGCCCAGAGCCC
Fam170a	AACACAGGAGAAGTATTCGG
Fam170a	GAAGAAGCCACCCTTCCTGA
Fam170a	GGAGGAAGAGGACCACACCG
Fam170a	AAGGACCATTGCGACAACAG
Fam172a	ATGGCACAAATGCAGCAGGG
Fam172a	ACCGAGAAGACTTACACAGG
Fam172a	AAGGAGAGATAAGGTCTCCA
Fam172a	AGAGCATGCGGTCTATGTGT
Fam172a	AATGTGTGGCATCAAGAAGC
Fam174a	GGGCAGCAACAACAACACGA
Fam174a	AAGGCCGGAGAAGGTTCCCA
Fam174a	CACGAAGTACACCAGCACCG
Fam174a	GAAGAAGAAACCGCAAGACT
Fam174a	GAAGAAACCGCAAGACTAGG
Fam53c	AAACATGATCACCCTGATCA
Fam53c	CGTGCATTTCAGCTCATCCA
Fam53c	TGGACTCCCATCAAGCACCG
Fam53c	GACAGGGAGAAGCGGCGCTG
Fam53c	GCTGAGTGAAAGCGAAGAGG
Fam71b	GGAGGTGTTGAACACGCCCA
Fam71b	GGGCGTGTTCAACACCTCCA
Fam71b	AGTAACTCAACGCTTCCCAC
Fam71b	GGACGGCAGGAGCAACAGCA
Fam71b	GCTCTGCAAGGTTGACACGA
Fat2	GGAATGTCAAGACTGTCCCA
Fat2	CTGACCTTCAACCTCACCAG
Fat2	ACTAAGGTCCACCTCCAGGG
Fat2	AGTGGGATGGAGGATGGCCG
Fat2	GTCTAGCTATAACTTGACTG
Fbll1	GTTGAATTCTCCCATCGCGC
Fbll1	AACCGCATAGACCAGGCCGT
Fbll1	GTGTGAGACAGTGGTTCCGG
Fbll1	GAGGGCGTGTTCATCTACCG
Fbll1	GAAGGGCATCACGGTGTCGG
Fbn2	GACAGCAGGAAATACTCCGA
Fbn2	GGATGGAAGACGCTCCCTGG
Fbn2	AACATGTGTACTTGTTCCAG
Fbn2	AGCGTGAGGTGCATGAACGG
Fbn2	TGTTGATACAGTTTCCACCC
Fbxl17	TGCCCGGAAGAGCTGCACGG
Fbxl17	TTACTGCAGAAAGTCCACGT
Fbxl17	GTTACAGAGGATATACATGC
Fbxl17	AGGAGTCATTCACTTAACCA
Fbxl17	ACTGGATAATGAAACCGTGA
Fbxo38	GATGGACAGTGAGGTCGCTG
Fbxo38	TCTGAGAGTTGTCAGAGTGG
Fbxo38	GCAAGCGTGCCCAAACTTGG
Fbxo38	AAGTTCGCAAGCTGATGCAA
Fbxo38	GATGCCAGACCTGTTACCAA
Fcho2	GGAAGTTCAGAAGTATGGAG
Fcho2	TCAGGCACTCCAGAAGTCGA
Fcho2	GATCCACTTACAGATCGGCC
Fcho2	GATACTTACAGATACTGCTG
Fcho2	TCAAGCGACGATCCGAACAG
Fchsd1	GAGGGAGGCGGATCTACTGG
Fchsd1	ACAGATCTTACAGCAAGCAA
Fchsd1	TGGAGGCCAAACCAGACTCC
Fchsd1	GCGTGTATGGGCCTTGGCCC
Fchsd1	TCCGAGAATGGAAGATCCCA
Fem1c	TCATCAAGCAAGTATGCCCA
Fem1c	TTGGAAGTGTCCAACCGCCA
Fem1c	GGCAAGCAAATCGAAAGCGG
Fem1c	TTAAGCGATGCATCAACCTA
Fem1c	AATGGCCTATGACTATGCCA
Fer	GAGTGACCTGAAGAACTCAC
Fer	GATAATGAAGACACATGCAG
Fer	TGTTGTCATACCTTTCGCTA
Fer	GAAGTGTGGTATCATAGTAC
Fer	GATAACCAGCCTTGTTACAG
Fgf1	TTCTTGAGGATCCTTCCTGA
Fgf1	ACTGCTCTACTGCAGCAACG
Fgf1	TACTTGGCCATGGACACCGA
Fgf1	GACCGGCCAGTACTTGGCCA
Fgf1	CTAGTCAGAAGACACCGGGA
Fndc9	ACAGTAGTGACTATACGGGA
Fndc9	ACCGAGGTTCGTGACAGCGG
Fndc9	AATGGAGGAAGCCAATGGGT
Fndc9	ACTGCCACGAAAGAACTCAG
Fndc9	CAGGGCCAAAGCTGAACCAG
Fnip1	GCGGAGCGGATTAGGCGCGC
Fnip1	ACTTGGGTCAAATTCTGGCA
Fnip1	GAGGAAGAACTATCTCCTCC
Fnip1	ACTTTGCTAAGCATAAGCTG
Fnip1	GATAGCAGCACAGTTAGTAA
Foxd1	GGAGGAGACAGACATCGACG
Foxd1	GGAGACAGACATCGACGTGG
Foxd1	GCGGAGGCGCTCTTACGCCG
Foxd1	GAGTAGGGCGGCTTCACCAG
Foxd1	GTGCGGATGGAAGGCGGCGG
Fst	CATGGAGGACCGCAGCGCCC
Fst	GCTGAGCACCTCATGGACCG
Fst	GAACTAGAAGTACAGTACCA
Fst	AATGGATCTGCCCAGCAAGC
Fst	GAAGATATCCAGTGTGGCGG
Fstl4	GTGCTGGGATGGATGGACCA
Fstl4	GTTCCCGTAGAGCCTCCCGT
Fstl4	TACAGGAGACATGTGCACCA
Fstl4	GGCTGTGTAGAACTCTCCAA
Fstl4	AGTGTGACTACCGTGACCGT
Ftmt	GGTCCGCCAGAACTTTCACC
Ftmt	CATGGCTTACTACTTCTCCA
Ftmt	CCTGGAGAAGTAGTAAGCCA
Ftmt	GCACAACTTAGTCACCATGG
Ftmt	AAGATATTCCGCTAAGCCCG
G3bp1	ACACCTGTGCAACATGTCCG
G3bp1	TGCATCTGCTGGCTTCCCGT
G3bp1	CCACACCAAGATCCGCCACG
G3bp1	CATTCAAGAGGACAAGCCTG
G3bp1	AGTAAGAACCTTCCTCCCAG
Gabra1	TAAGCTCCTGCGTATCACAG
Gabra1	GCTACAACCACTGAACGGGC
Gabra1	GTTGAGCCAGAAGGAGACTT
Gabra1	TGCCAGAAATTCCCTCCCGA
Gabra1	TAGCAATAGTTGCCAAGCCG
Gabra6	TATGACAACCGTCTACGGCC
Gabra6	TAATCGGAAGAGCTTGTTGG
Gabra6	GAGATTGGTTAACTTCCCTA
Gabra6	GCCCAATCAAATCATACTGG
Gabra6	TAAGATGGGCGTTCTACTGA
Gabrb2	TTACCTCTGAGCACAGACAG
Gabrb2	TATGTCGCTGGTTAAAGAGA
Gabrb2	ATGATTCGATTGCATCCCGA
Gabrb2	GGACCTAAGGCGGTATCCAC
Gabrb2	TAATCTACGATGGAGAACTG
Gabrg2	TCCTGCTATCGCTCTACCCA
Gabrg2	AAACTTCGACCTGACATCGG
Gabrg2	GGTTGAATAGCAATATGGTG
Gabrg2	GCAATTACACAACTTCCCAA
Gabrg2	TGGGTGACACAAGATCATGG
Galnt10	ACTCACCTGAACCGCCGCGG
Galnt10	GAAGGACTGGCATAACAAGG
Galnt10	GTAGAGCTTGCTGTTACAGC
Galnt10	GGTCCGGAGAATCCTCACGC
Galnt10	AATCCCTCCAGAGCTGCAGA
Gapt	GTGGCCTTTGCTTTCCACCG
Gapt	AAAGCCTCGGTGGAAAGCAA
Gapt	TAGCCCAAGCATGAAAGCCT
Gapt	AGAGCAGCAAGAGGACTAGG
Gapt	ATGCTTTGAGAGTTCTCCGG
Gcnt4	ACAGCCACAGGGTTAAGAGG
Gcnt4	GGACAACGTTAACTGCTCGG
Gcnt4	CGGATACCAGGAATACCCGG
Gcnt4	ACGGAGCTGCAGAACTACGG
Gcnt4	TTCAGAGAAGTTCATGACAG
Gdf9	CAGGCAGCAGCAAGGACCAG
Gdf9	AAGGTTCTATCTGATAGGCG
Gdf9	ACAGGGACTGAAGAGCCGGA
Gdf9	ACTGTTTGAAGTATTCGCTG
Gdf9	GTGTTGACCATTGAACCCGA
Gfm2	ATAGTACAGGATTCTCTCTG
Gfm2	CGATGATGGAGACACAGTGA
Gfm2	GAGGGTGTTGGACGGTGCGG
Gfm2	GGTGAAGCCAGAACTTTCCA
Gfm2	AAGTGGTCACCGCATCCAGC
Gfra3	AGTAGCAGGATCATCAGCAG
Gfra3	AAGGCTGCCTACCAGCACCT
Gfra3	ACAGCAGCAGACCCTGAGCG
Gfra3	GATGTCTGCGGGCATACCTG
Gfra3	GAGCATACACACCGAGGCAG
Gin1	TGCATACTATAAGCGCACAG
Gin1	AAATGCCGTGATGGACACCA
Gin1	TCAACAGTAACTACACTCCA
Gin1	GGTCGGCACAGTGTTTGGAG
Gin1	GATTAGAGAGGCTGATGGCG
Glra1	AGAATACAATGGTCTCCCAA
Glra1	GAGCTTATCCAGGAAGTCCG
Glra1	TTGCAACTTACATTCACAGG
Glra1	ATAGGGTCAACATCTTCCTG
Glra1	GGACCTGAAGAATTTCCCGA
Glrx	CTGCAAGATCCAGTCTGGGA
Glrx	GTTTGAAAGGCAGTTGACTG
Glrx	TCTTTACCTATGAAGACCCG
Glrx	ATAGGTAAAGACTGCATAGG
Glrx	AATCTCCATGCAACAGACTG
Gm2a	CTTCGGGACGAGGCGCGCAG
Gm2a	CCCAGGAGAAGCCACCAAGT
Gm2a	GTGACAGGTGGAGCTCACCG
Gm2a	ACAGTGGCAGGGCAGCCCGT
Gm2a	ATCCAGAGTATCTTGAGCAG
Gm94	CTAATCCTGACATGCCGGGC
Gm94	GGATTAGGGCACTCAGTCCC
Gm94	ATCCTCTGGACATGGAGCGA
Gm94	TTTCAATGATCTCTGAACCC
Gm94	ATGGAACTTGAAGGCGATCC
Gnpda1	TCTTTCCCACAGCATACCAG
Gnpda1	GAGAAGATCCAGGCTGCCGG
Gnpda1	ACCATCAAAGAACCTAGCGT
Gnpda1	TCTGTACAAAGCCATCGAGG
Gnpda1	TTCTCCTTGATACTGTACAG
Gpbp1	TACTCCTCCATCATCAACAA
Gpbp1	GGTATTGGACGTCCTAATGG
Gpbp1	GAGAACGGGAATTTCCACCA
Gpbp1	TCTTAACTGGCTGTGACTGG
Gpbp1	AAGTCATGCTGGCTCAGAGA
Gpr150	GATGGCGGTGGAGTGCCTGG
Gpr150	AGCATCCCAGCGCACCACGA
Gpr150	AATGAGCGCCACCAGGTGGG
Gpr150	GTGCTCTGCCGCCTGTGCGG
Gpr150	AGAAGACCAGATGGATCCGG
Gpr151	AAGACAATGACCCTATACCC
Gpr151	AAAGCCAGCAGTTACTTCAG
Gpr151	GAGGGCCGATGCCACCACAG
Gpr151	GGAGGGCCGATGCCACCACA
Gpr151	CGAGCGGCAGCATACTCCAA
Gpx3	TGCCCGGAGGATCCGGGCCA
Gpx3	ACAGAAGGCAGGATGCCCGG
Gpx3	GGTCTGACAGACCAATACCT
Gpx3	TGAGAACTCACTTGAGACTG
Gpx3	AGAGGCGGCCAGGTGAGCCC
Gpx8	GGAGCCCAAGTCCAGCAAGG
Gpx8	ATCGGAGCCCAAGTCCAGCA
Gpx8	ACTAGCCACGTTTACAACCA
Gpx8	GAAGTATCTGGTCAACCCTG
Gpx8	ATTCTTCCAAGAAGGAGCCA
Gramd3	AAAGTGCTCACCAAGAGAGA
Gramd3	AGAGGCTGAGAATGGTGCGG
Gramd3	ATTCCTGGATGTCCCAACTG
Gramd3	CCAAGGAAAGCTCTTTGTGT
Gramd3	AAACGCCCTGATCATCGCGA
Gria1	GAGTGATGAAGCACACATGG
Gria1	CAACATTCTAACAACCACGG
Gria1	TGACGCTCGGGACCACACCA
Gria1	GGATTGACATATCCCGGCGA
Gria1	GAAGCATGATGGAATCCGCA
Grpel2	GCTGCAGCGCCTCCTGGCCT
Grpel2	ACATGGCGGCGCGTTCGCTG
Grpel2	AGTTCCGAGGACCCTCCTGA
Grpel2	ATCTTGCCGAACTAATGCCA
Grpel2	AGGGTCGTATTTGTCACCGA
Grxcr2	AGACAGCGGCGCCTACACTC
Grxcr2	GAGGCCCTTGAACCAATGGA
Grxcr2	TGTGCGCTCCGACTCCGGCA
Grxcr2	AGCGTCCCTGATGATCACAG
Grxcr2	TATGGGCTGCAAATTCGGCA
Gzma	TGAGGAACGCCTCTGGTCCC
Gzma	CAAGAACTTACACGTTACAG
Gzma	TGATGAATATACACGTGAGG
Gzma	AGGAGTCCTTTCCACCACGG
Gzma	AGAAGTGTGGAGATCGCCGA
Gzmk	ATGGGCTCTGGTTTCCCTGG
Gzmk	GGACTCACCAAGAGTAGCAG
Gzmk	CAGAGGCCACTCTCCCACCG
Gzmk	AATGTCCAACTGCTTCACCT
Gzmk	AGCCCTGAGAGACTAGGGCA
H2afy	GGCCGGAGTCATCTTCCCTG
H2afy	ACAGCTAACAGGATGTGCCG
H2afy	GGTGTCACCATAGCCAGCGG
H2afy	GGCCAGCGCAGACAGTACGA
H2afy	TATGGCCTCCACCTCAAAGC
Hand1	GCCAGGCCGAGTCAGAGCCC
Hand1	TAGGTGGTGGCCCGCCGGCA
Hand1	GATGTGCGTAGCTGCCCACG
Hand1	GCCTCAGCAAGTCTGGGCGC
Hand1	AAGAGGATTAAAGGGCGCAC
Hapln1	GAGTGTAGCTGTCTGAAAGG
Hapln1	GACAGAGTTATTCACATCCA
Hapln1	AAGATCCGTGATGACCAGGG
Hapln1	AAACCACGAGAGCCCTGCGG
Hapln1	CTAGCCAGCCGGCATCGCAG
Hars2	TCACCTGGCTATGACAGCCG
Hars2	AGAGAGCCCAGCTATAGCCC
Hars2	ATATCCCATCTACAACCCGA
Hars2	AAAGAAAGGTCTAGCTCCCG
Hars2	CTTGAACAAGTCCTCAACCA
Hars	ACAGGAATAGTTTACCTTGG
Hars	TATCAATCACTTCTGCTCCA
Hars	ATACAGTAAGGTCATAACGG
Hars	GACAACCCAGCTATGACCCG
Hars	GATCGGCAACTTCCTGGTCA
Havcr1	CAGAAGATGGGCATTGCCCT
Havcr1	GTAGTTGTGGGTCTTCTTGG
Havcr1	TTACCTGTAGGAGTATGGGA
Havcr1	ATTACTCCAGGTATCTCCTG
Havcr1	ACTGCTCCTTGTGAGCACCG
Havcr2	AATGTGACTCTGGATGACCA
Havcr2	TTCTCCAAGAACCCTAACCA
Havcr2	GTGACCCTCCATAATAACAA
Havcr2	GACACCAATGATAAGTGCCA
Havcr2	GCATTTGCCAACCCTCCTGG
Hbegf	AAGAGCTTCAGCATCACCGA
Hbegf	AACCAGCTGCTACCCACGGG
Hbegf	CAAGGACTACTGCATCCACG
Hbegf	TCATGGGCTGACTCTACCAG
Hbegf	AGAGAAAGTGAAGTTGGGCG
Hdac3	GATGTGGGCAACTTCCACTA
Hdac3	GAGCCTTAATGCCTTCAACG
Hdac3	GCAGAGATGCGCCTGTGTAA
Hdac3	ATTGCCATCAACTGGGCCGG
Hdac3	TATCAATGTAGAGCACCCGA
Hexb	GCTGTTGTACATCTCCGCGG
Hexb	AGGACTCGCACTCTGACTCG
Hexb	AACGCTGTTGGCCTTGAGGA
Hexb	TCTCCAAGATTCCCTCATAG
Hexb	TGTTTGTTTGCAGGATGCCA
Hint1	GATGGCTGACGAGATTGCCA
Hint1	GCTCAAGTGGCCCAGCCCGG
Hint1	GCCGAAGATCGTGTCGCCGC
Hint1	GCAGATCTGGGCCTGAAGCG
Hint1	GTGAATGAAGGTGCAGACGG
Hmgcr	TTCCCACAATAACTTCCCAG
Hmgcr	CTGGAAGTAAATGTACAGGA
Hmgcr	AGCCTGTCAGTTCTTTGTCG
Hmgcr	TCACCTGTGAATTTGAACTG
Hmgcr	AGAGCGTCAAGAGTGAATGT
Hmgxb3	TGAGGTAACTGTCCTGATGG
Hmgxb3	GAGCTGGAGGCTCCTCAGCG
Hmgxb3	GCACGGCCAGGCTTCCAGTG
Hmgxb3	ACGACCGAGTAAGCAGGCAG
Hmgxb3	TGTGGAATAGACCTTACCTT
Hmmr	GGACAAACGGATCCAGGACA
Hmmr	GAATATGAGAGCTCTAAGCC
Hmmr	GAAGCTGCAGGCCACTCAGA
Hmmr	TACAGACAACCTTGTCAGCA
Hmmr	GCAGCTCTGCTCTTTCCAAG
Hnrnpa0	TACAGAGGCGGCTACGGCGG
Hnrnpa0	TACGGGCCGATGAAGAGCGG
Hnrnpa0	AACGGGCTGGCCAAGGGCGG
Hnrnpa0	AAGGAGGATATCCACGCGGG
Hnrnpa0	AGGTCACGAAGCCGAAGCAG
Homer1	AGTAACTGCATGCTTGCTGG
Homer1	TTGCCCGGCTATCAGCCCAT
Homer1	TGTGACACCCACCTGTGAAG
Homer1	TGACACAGAACTCAGAGCCA
Homer1	ATTGGCAGTGGACTCCAGCA
Hsd17b4	GGTCTTGGTCACCGGCGCCG
Hsd17b4	ATTGGGCCGAGCTTACGCCC
Hsd17b4	TGCAGTGAACGACTTAGGAG
Hsd17b4	TGGAGAAGGAACGGTCCCTC
Hsd17b4	ACGGAGACTGTGTTGCCGGA
Hspa4	AGTAGCCGGCGCCATGTCGG
Hspa4	GATATTGTGCAGTTGCCCAC
Hspa4	GAGACAACACAGTCTACCAC
Hspa4	TCTACACTGATGCAGAACGG
Hspa4	AACACTCAATGCTCAAAGGG
Hspa9	GATAAGCGCCAGCAGAGCCG
Hspa9	GCTGTAAAGGCAACCACAGA
Hspa9	ATGAAGATGAAAGAGACTGC
Hspa9	GCTGTGTATGATTTAGGTGG
Hspa9	AAGACAACATGGCGCTTCAG
Hspb3	TCATGATGGAATCTTGGTGG
Hspb3	GATCAGCAGCCAGCCCTCGA
Hspb3	TGTGGTCCAGTTCCTGCCCG
Hspb3	GGAACTGGACCACATCCAGC
Hspb3	ACGGAGAAGCCACCCGGAGA
Htr1a	GATATGTTCAGTCTTGGCCA
Htr1a	AAGGGAGCGCTCCAGGGCGA
Htr1a	AGTGAGCGAGATCAGCGCAG
Htr1a	CAGTGCTGAGAACAGGGCGG
Htr1a	TGAGGACGACGCCACCCTGG
Htr4	GCTGCTCACGTTCCTTGCAG
Htr4	CAGGTGAAAGATCGATGCTG
Htr4	TGTTCCTATAAACCAAAGGC
Htr4	AATTGATATAGCCAAGCCAG
Htr4	GGTGACACCGACTCTCCCAC
Igtp	TCAAGCGCCTCATCAGCCCG
Igtp	GCAGTCATAGATTTAGACCA
Igtp	TATTGGTAAGGCGGTGACAG
Igtp	TATCCGGGAGAATCTCCAGC
Igtp	GGAGGCAGCTGTCAGCTCCG
Ik	AATGAGGATCATCCACATCG
Ik	TGGTGACGTGACTTAGAAGG
Ik	GATGCCAAGGGAGTACAATG
Ik	GAAATACCGGGACCGTGCCA
Ik	TTTGCTGCGTATGAGAGTGG
Il12b	AACGATGGCAAACCAGGAGA
Il12b	GAGGTTCACTGTTTCTCCAG
Il12b	AAGCACCAAATTACTCCGGA
Il12b	GTATTCAGTGTCCTGCCAGG
Il12b	GCTGGGAGTACCCTGACTCC
Il13	AGAGACACAGATCTTGGCAC
Il13	AGATCTTGGCACCGGCCCTG
Il13	TGGAGTGTGGACCTGGCCGC
Il13	ATGCCATCTACAGGACCCAG
Il13	ACAAAGCAACTGTTTCGCCA
Il17b	GATGGACTGGCCGCACAGCC
Il17b	GCAAGGGAGGCCCAGTCCCT
Il17b	GCGGCACCTGATGAGGCCCA
Il17b	CATCCCTGCGGACTTGCCCG
Il17b	GAATCCCTTCACCATGCAGG
Il31ra	CTGCCAGGCTGAATTTGCAG
Il31ra	AAGACGCAGGAAATGTTCTC
Il31ra	TCAACACTGCAGATGTCTGG
Il31ra	GAACTGTCAACAGTAGCCAC
Il31ra	TGAAAGCCTGAAGTCCTGTG
Il3	TCAACGTTCTGGTTAAACGG
Il3	TTGAAGCTTGGAGTCCCAGG
Il3	ATGATGAAGGACCCTCTCTG
Il3	CCAAGGAGAAGTGGATCCTG
Il3	ACGGAGCCAGATGCGGGCTG
Il4	TGTACCAGGAGCCATATCCA
Il4	GCAGGATGACAACTAGCTGG
Il4	AAACGTCCTCACAGCAACGA
Il4	ACAGACGAGCTCACTCTCTG
Il4	TGTGGACTTGGACTCATTCA
Il5	CATGGGAATCTCCATGGCAG
Il5	GGAGATTCCCATGAGCACAG
Il5	TGAAGAATCAAACTGTCCGT
Il5	AAGAATCAAACTGTCCGTGG
Il5	TTCACAGGAGAAGTGTGGCG
Il6st	CCTGCAAGATGTCAGCACCA
Il6st	ATTCTGCTCGATCTGCCCAA
Il6st	GGAAGAATATGCTGTGCCAG
Il6st	TCTAAGTACCTTTATCCACG
Il6st	GGAGACATTGTATCTTCAAG
Il9	CCAGAGATGCAGCACCACAT
Il9	GCCAGAGATGCAGCACCACA
Il9	GACGGAGAGACACAAGCAGC
Il9	TACCACACCGTGCTACAGGG
Il9	AAAGCCATGCAACCAGACCA
Ipo11	GACCTGAAGAACCACAGAGC
Ipo11	ATGGGATTGATCGTTACTGG
Ipo11	GATCGCAGTGCTGATTGCCA
Ipo11	GCAGAAATGTGTCTGTATGA
Ipo11	GGAACCTCATAAGAATATGG
Iqgap2	GAACACTCACAGCCGTAGCG
Iqgap2	TGATGAAAGGCTGTCTGCAG
Iqgap2	CTGGAAGAAGGGCTCCGGAA
Iqgap2	GCTTACCTTGGGCAGCCCGA
Iqgap2	AGGAGGAGATCAGTAACATG
Irf1	TTAATCTGCATCTCTAGCCA
Irf1	GCAGGGAGTTCATGGCACAA
Irf1	TTTGCTCTTAGTGTCTCGGC
Irf1	ATGGAAAGGGACATAACTCC
Irf1	CAAGTACAAACCTTCGGAGG
Isl1	GATTGCCGCAACCAACACAC
Isl1	ATTGCCGCAACCAACACACA
Isl1	GATGTGGTACACCTTAGAGC
Isl1	TCATGAGCGCATCTGGCCGA
Isl1	TCACTCAGTACTTTCCAGGG
Isoc1	CGTGGTGCAGCTCTTCGCCG
Isoc1	CGGAGGTGTGAGATTTCCCA
Isoc1	AACACGACACTCCGGACGCC
Isoc1	GCCTCGGCCGACCAGCTCCA
Isoc1	AGAAAGCAGACCCGACTCCG
Itga1	TCTAGGCTAGCAGGACGCCT
Itga1	CATGAGCTTCAGTGGTCCAG
Itga1	GGTAAATCCAACTTCACACA
Itga1	AACTTTAGTCACCAATCCGA
Itga1	AGGCAGTGACACTTTCCCAG
Itga2	ATGGGACCGGGACAGGCAGG
Itga2	AGATGTGTACAAGTGCCCTG
Itga2	GATAAAGACCAACATGAGCC
Itga2	ATACAACTACAACATCCACG
Itga2	TCAGAGCTATCGAATTCGCA
Itk	TGATCAGCTGTTCTTCCAGG
Itk	ACAGAAGAAGCGCACGTTGA
Itk	TGGGTGCTGACCCTTAAAGA
Itk	AACGAGGAATAACAACAGCC
Itk	GTCGTACAAGGCAATGACCA
Jade2	TAGGAAGGCCTCACCGTCAG
Jade2	GAACGAGAAGAAGCCCTCAG
Jade2	GGATGACTACTACATCCTGG
Jade2	CAACTCGGAGCTCAAGGAGA
Jade2	GCTGGGCATCGAGTACGACG
Jakmip2	GAATAAGGGCGAGAAGCCCG
Jakmip2	AATCCGAACGGGATATACGG
Jakmip2	GATGGATGAAATCAAAGCCA
Jakmip2	CAAGAGAAACGATGAACTGA
Jakmip2	TCATCCGTAGAAGAAAGCAC
Jmy	ACCCGCACCGACGACACCGG
Jmy	AGCCTACAGCAGCCTTGCAG
Jmy	GCCCAAATAATCATTCTCCA
Jmy	CAGATGCAAAGCTTACAGGG
Jmy	GCAGCAGAAGGCACGCCAGC
Kctd16	TAGCCAAGGACTCCAAGGGA
Kctd16	GCTTTGCTTGACATCCTCGG
Kctd16	AGAGTGTGGATTCCACATGG
Kctd16	TGAGAGGAGGACCACCGGGA
Kctd16	AGTGGACAGGTCATTGCAGG
Kdm3b	GAGGCCGAAGCTGAGGCCGT
Kdm3b	TTCAGCGTGAACCTTAACCC
Kdm3b	AACGAAGCTCTCGATCCACA
Kdm3b	GTCAAGGTCTACCAACCCGA
Kdm3b	GCTGTCCATCAGCATCACGT
Kif20a	TCATCAGAGAGTAAGCCCGC
Kif20a	ACTGGAGGACACCTCAGAGA
Kif20a	TTTGGGTGCCTGCAGCACAA
Kif20a	ATGGTGAAGGATGTGCTCAA
Kif20a	GTGTCGGATGAAGCTGGCCC
Kif2a	GTGGAGATCAAGCGCAGCGA
Kif2a	AGGCCGAATACACCAAGCAA
Kif2a	TAACAGCTGCCACAGTCCGC
Kif2a	TGTGCAGAAGACGATTGCTC
Kif2a	TGTATGATCAGAGACTTCAG
Kif3a	ACTGTCCATCCTCACCGGCA
Kif3a	GGAGGAATCGGTCTTATGGA
Kif3a	GACAGGCAAGACTTTCACCA
Kif3a	TGGGTAAAGATCAGACCCAG
Kif3a	AGAGTGCAGTGAGAAAGGCG
Klhl3	AGGTTGGAAAGCGTGGCCAT
Klhl3	AGGCTGACCTCCGCATCAGG
Klhl3	AGGATGAAGAGAAGAACCGG
Klhl3	GGAAGTAGAAGCTCACCGTG
Klhl3	GAAGATCGAAATCAAGGACG
Larp1	AGTGGAGCCGCTGCTGCCGG
Larp1	TAAACCGCGTAAGGGCAGCA
Larp1	GATGAGGACTGCCAGCGAGG
Larp1	AGACATACACCCGCTGTCCG
Larp1	CCTTCCGTGGCCGTGGACGG
Lars	GCCGCCCAAACTCACCGCCA
Lars	TGAAGTCAGTGCCTCCCGGC
Lars	ACCAGTACAGTGCAACCCAA
Lars	GTAGTGAGGGATAAAGCCAA
Lars	GTCGTCATCAGAGAGCCCAA
Leap2	TTACCTGACCCAGCAGCAGC
Leap2	ATCCCGGCACGAGGCACCAA
Leap2	ACGAGGCACCAATGGGCCTG
Leap2	TCACTCCTGGGCCACACTTA
Leap2	AAGACGCTGTTCCCTAAGTG
Lect2	GTCCTTGTTGGACTTACCAG
Lect2	GTGGACAGTACTCTGCTCAA
Lect2	ACGTGTGACAGCTATGGCTG
Lect2	AGAACCCAAAGGCATCACCC
Lect2	GCCCGGGTAAACTTTCTGCA
Lhfpl2	AGGCCACCACGATACTCAGG
Lhfpl2	GGGAAAGCCAAGACCCGCAG
Lhfpl2	CATGGTGAAGACGGACACCA
Lhfpl2	AGTATAGAAGGCCCAGCCCA
Lhfpl2	AATGGCTTCCAGATTAAAGG
Lix1	ACTCGAGATGGACAGAACCT
Lix1	GAGAGTCACATAGCTCACAA
Lix1	TCAATGAGCTACCCTCCCGA
Lix1	GATGACCCAAGCACAAGTGT
Lix1	GAGAGCACTTTGTTTCACGG
Lmnb1	TAAGGTGCGCAGCCTGGAGA
Lmnb1	TCTGAAAGATCAGATTGCCC
Lmnb1	TCGCTGTCAGAGCCTTACTG
Lmnb1	GAAGCATGAGACCCGCTTGG
Lmnb1	AGTGGAAGTGTTCATCTCTG
Lnpep	AAGATGGAGTCCTTTACCAA
Lnpep	AAACGGGAAAGTGTTCCCAT
Lnpep	AAAGCAGATCTTGCTGCCAG
Lnpep	GAATAAGTCCTTCTTCTGCA
Lnpep	TGGTCAAGTTCACCATGCCT
Lox	CCTGGCGCCAGACAATCCAA
Lox	GTACAACCTGAGATGCGCTG
Lox	GAAATCGTAGCAGTACCCTG
Lox	CAAAGCAAGCTTCTGTCTGG
Lox	CGGCAGACATAGACTGCCAG
Lrrtm2	TCCAGCAGAGCTGAAACCCG
Lrrtm2	TTGGAAACTGCCCAGCCAGG
Lrrtm2	TGTGCAGACTGCTTAGCCGG
Lrrtm2	AGAATAGCAGCTTCTCACAG
Lrrtm2	AGGTGGACACGCCATACCCA
Lsm11	TCCGGTGGAGGTTCCCGCCG
Lsm11	TAGGAGCTGACGTCCAGCCG
Lsm11	CATATTCCAGAACTTGTCGA
Lsm11	GGTCTCATCCACGTCAGTGA
Lsm11	AGGGCCACCACCCTTTCACG
Lvrn	TAGCGCCCACTCCTGGCCGC
Lvrn	TTGGAAAGAGCCGCATACCC
Lvrn	ACAAGGGCAACAAGGTACGT
Lvrn	ACACCTGGTGCCCAACCTCA
Lvrn	GAAACCTGGTGACCATGAGC
Lyrm7	CACCTTGGCGGGCTGACCCA
Lyrm7	AGCCATGGGTCAGCCCGCCA
Lyrm7	TTTACTTACGCAGTGTGTCA
Lyrm7	TCTGTGAGAAGATCTTTCCT
Lyrm7	CTGTGAGAAGATCTTTCCTG
Lysmd3	CTCCCAGGAATTCAGGCCAG
Lysmd3	ACTGGCCTGAATTCCTGGGA
Lysmd3	GTCTACGAACTTCGGTCCAG
Lysmd3	GAAGAAAGAGAACCATCAGC
Lysmd3	TGTTAGTCACCATTCAACAG
Man2a1	GAAAGGAGCCCTCCTGGCGC
Man2a1	TCACCAGGCAACGCCAGCCA
Man2a1	TAAGTATGAAGCGGATGAGT
Man2a1	CAGCTGGAAATTGTGACCGG
Man2a1	ACAGGAGTGAAACCTCGATC
Map1b	GGGCAGCATCGGCAACCCGG
Map1b	GATTGAGTGCAACTTGGACC
Map1b	AGATGAAGCCGTCAGCACTG
Map1b	TGAGCACCAGCAGTTTATGG
Map1b	AGTGTGGAGAAAGACAGCGG
Map3k1	GAGTCGCTTCCAGCCCGCGG
Map3k1	CAAGATGGAGGATCGCCCGG
Map3k1	GATGGGCTTCGTCGGCCCTT
Map3k1	ATAGTGTTGGACACTACCTG
Map3k1	CCCGGAGCATGACAAACAAG
2024-03-03	TGTCATGCAAGTTTCAGCCA
2024-03-03	AGTCTGGCAAGACTTCGGGC
2024-03-03	AATGTGCAGGATCTGCCATG
2024-03-03	AGTGAGGGCAATGAGTCCGA
2024-03-03	AATGGCGTCGGACCAATCAG
Marveld2	GAAGCAGTTCCACCACACCC
Marveld2	GATATCAGATACATCTCCGA
Marveld2	GCTTCGGAATGTGGCCGGGA
Marveld2	AGAGTACAAAGAGCTGTCTG
Marveld2	GTGATGAATTGGGATACGCA
Mast4	GCCAGAGGATGACTCCGCTG
Mast4	GATGGGAAGCAGCTGCGGCG
Mast4	ACCAAGCTGGCTGTGAGCGA
Mast4	ATAGCCCTCAAGACAGTCCA
Mast4	ACAGAACGGATGGGCGCCGC
Mat2b	CCACCAGCTGGCAGCAGCCG
Mat2b	AAGTGAACATCCCTAGCCGG
Mat2b	TGCCTCTGGGAACTTGGCAA
Mat2b	ACATGGACCATTGGCAGCAG
Mat2b	TGAAAGGTTCCCTTAATGGA
Matr3	CTTCCATGGACTCTTACCGA
Matr3	GAGTGGAGTCAACATATCAA
Matr3	AGCCTGAGCATCTTCTGTGG
Matr3	GGTTGACCACTGTTTAAAGA
Matr3	GGATGGTGAGAAGGACACCA
Mblac2	GGAGTGATCGAAGTGCACGT
Mblac2	GTGCACTTCGATCACTCCGG
Mblac2	GTCGAACTGATAGAGACCGC
Mblac2	CACATGCCAGGTCACTCCAG
Mblac2	AAACAGCCTTTCGGCACCAA
Mcc	GCGAGGAGGAGCGACTGCGG
Mcc	TGAGTGAGAGAATCACCTCC
Mcc	TTGTGGAGCACAGCCTGCTG
Mcc	AAAGAAGTTGGCCAAAGCAC
Mcc	AAGAAGATAGACCGCCTGCA
Mccc2	GGTACAGCAGCCCGACAGCA
Mccc2	GGAGTGAGAAGGCCCGGGCG
Mccc2	GCCCGTGATGATGCCACCGG
Mccc2	GTAGGTGCCTCCTTTGACGG
Mccc2	GGAAAGGTGTCTGCTTGCCG
Mcidas	GGATGCTGGACCTGTCGCGG
Mcidas	GGCGGTGTACGAGGACCCTC
Mcidas	GCAGCGAGGTGCAGTCGGCG
Mcidas	GCAATGGATGACCTCATTGC
Mcidas	CGAAAGACGAAACATCACAA
Mctp1	TTAGCTGCCCGTGATCGAGG
Mctp1	AGGAAATCACACCTTTGGAG
Mctp1	AAACTTTGAACCCTCAGTGG
Mctp1	GAGTGACAAGCAGAACCAGG
Mctp1	GCTGACAGGGCCAACAAAGG
Med7	GGAAGTGCACTCACTTGCTG
Med7	ATGTACTGCATTGGAGGCGG
Med7	AGCGCCTTGAAACAGCTGAG
Med7	TCTCAGCTGTTTCAAGGCGC
Med7	GAGAGTTAAAGCTGAGCCGA
Megf10	GGGACAGTTACCTTTCCCAG
Megf10	TGTGTAGTAGATCTGATCGA
Megf10	TACCGGACAGCCTACCGCCA
Megf10	TTGGAGCAATGCAGCGACCA
Megf10	GCTTGTGATGGTGATCACTG
Meikin	TATACCCGCAAGAAGAGGGC
Meikin	TCACAGGTAGCAGCTCACAG
Meikin	AGTCTGTTAAGTGTTACAGG
Meikin	AGTGACTGATACCTTTGAGA
Meikin	ACAGAGAGCACCGATGAGAG
Mfap3	AAGAGTGACCACCAGTAAGA
Mfap3	GAACTTTGATTCGCTCCCAG
Mfap3	ATTGGAGTGTCTTCTCACGG
Mfap3	AGAGGTGAAGATCACACGGA
Mfap3	CAGAGGTGAAGATCACACGG
Mier3	ACCTGGGCTCGAACTTCCAA
Mier3	ATGAACTAGCATCTCAGCAG
Mier3	GCACTGGAATTCGCAACCGC
Mier3	TCTTACATCGTAAAGGCCGG
Mier3	GAGGACGTTGAAACGGACAG
Mocs2	GATGATGGCAACCTCATCTC
Mocs2	TGCCGAGAAGCTCTCTGTGG
Mocs2	GAGACACTGCACCACACAGA
Mocs2	AAAGATCCTACCCAAGCCGA
Mocs2	AGAATCAATGGCGTAGCTCA
Mrpl22	TTCCGTAGGGCTCAGCATGG
Mrpl22	TCTGGGCAACGCAGACGCTG
Mrpl22	GCACTCGTGTGGATGCACGA
Mrpl22	CTGCGCCAAAGCCTGATCAA
Mrpl22	GCTGAGTCTACCTCAGGCCG
Mrps27	GAGCATCCCACACCGCACCA
Mrps27	TATGGCAGGACCTACCCAGA
Mrps27	GACACTGTCTAATCCAGCTG
Mrps27	CTGGGCAGATGCTTTATCCG
Mrps27	GAAGTGCATAGCCATACAGC
Msh3	TCAGTAGCAGCTCACCACCC
Msh3	AAAGCTAACCTTGTACCCTT
Msh3	TTACCACGATACCAACGGAA
Msh3	GAGGGAAGCAGTAATTCCAC
Msh3	AGAGAGATAGTTGACAGCCA
Mtx3	GCACCACCAAGGACTCGCTG
Mtx3	TCAGAGATGCTCACCACAGC
Mtx3	ACTTCACCGTGACAAAGCCG
Mtx3	TAGGAGATTTAGGCACTCCC
Mtx3	GAACACATAGGCGTCCAAGG
Myot	GATGTGAGAGCTCACTGTGG
Myot	ATGGTCAGGAGTCTTTGGAG
Myot	TGATGTCCAAGATTCACCAC
Myot	TAGATCGTCCTCCAGAGCAG
Myot	TAGATACCATGACACATCAG
Myoz3	AGCCAGTGATGGCTGTCCCG
Myoz3	TCTGAAAGAGGAGGGATCCG
Myoz3	TCCTGGCGAGTAGTGCCCGA
Myoz3	GATCACCCATCTGGGAGCAG
Myoz3	TAGCTGGTGAACTCCTGCCA
Mzb1	CGAGAGGGAAACCCTATCCC
Mzb1	TCGGGTGCAGGGCTATCCTG
Mzb1	GCAACGTCTGGCGAAAGCAG
Mzb1	ACGGGCCCAGGACTTAGCAA
Mzb1	CCAAGGCCAAGCGAATCTGG
Ndfip1	CGCCGCCAACGCCAAGGCCA
Ndfip1	GCCGTGATGCTGCTGTATGG
Ndfip1	GTTGTAGCCACATTATACGA
Ndfip1	CAGCTGAGGATAGGAAACGA
Ndfip1	TTGCCTGACCACCTCAGCTG
Ndst1	AGACTCGGAAGCATCTGCCG
Ndst1	TTTGGACCGATACATCCTGG
Ndst1	TCAGGGAAATTCTTCCACAC
Ndst1	CCACCAGAACTCTTTCACAT
Ndst1	GCACAGGGTACACACCGGAG
Ndufa2	TTCCGCCTCACCTCACACCC
Ndufa2	GAGCGGTCGGCGCAAAGCTG
Ndufa2	GCCGACCGCTCGGCTAGCAG
Ndufa2	GCGACCAGTACTCACCATAG
Ndufa2	GCAGGGATTTCATCGTGCAA
Ndufaf2	TTGGAGCGCCTTGTCCAGGG
Ndufaf2	TGTTTGGAGCGCCTTGTCCA
Ndufaf2	CAGGAGACATCCCAACCGAG
Ndufaf2	AAGGAAGACTCCACCCACTA
Ndufaf2	TGGAAGGGAAGAGCCCTCAG
Ndufs4	TGCCTACAGGAAGATGGCGG
Ndufs4	GCTGGCAGACAACCAGACTC
Ndufs4	GTTGATGCCCAACCCATCAA
Ndufs4	GGTCAGAACCATGTTGGAGA
Ndufs4	TCTAGGATGGAGCTATGATG
Neurog1	GCTTCAGAAGACTTCACCTA
Neurog1	CAGGCGCAGTGTCTCAGCCA
Neurog1	GACGCGACGACTCCTCCGCA
Neurog1	ACGAAGAGCAGGAACGGCGG
Neurog1	AGGACGAAGAGCAGGAACGG
Nipal4	GTTGGCGACCCGCAGCTCCA
Nipal4	GGAGCAGTAGAGGCTGACTA
Nipal4	ACCTGAAGGACCCAATGTGG
Nipal4	AGGACGCTCAGTGCTCCCAG
Nipal4	TATGGCTGGCAGCACAGTGA
Nln	GGAGGCCTCGCAGAGCCGAA
Nln	GAGAACATTCCTGCCTGCGG
Nln	GTGCTGAGGGAAGTCCAGCA
Nln	GCTGTGTCCCTGAAACTCGA
Nln	TTGGCCACTTGTGCTCGCAG
Nme5	ATCTGGCTTGATAAGGGCTA
Nme5	AGTAGCCAAGGAGACACACC
Nme5	ACAGCGAGGGACTCACCGGC
Nme5	TATACGGTACAGACGAGCTC
Nme5	GTAGCGCCAACCCTACTTCA
Nmur2	GTAGCGCTCAATGCTAACCG
Nmur2	GAAGTACTTGAACAGCACAG
Nmur2	GAAGAGAGATGAATCTCTTG
Nmur2	TGTGTTCAACCTCATCCACG
Nmur2	AAGAAGATAACCTTCTGGGC
Nr2f1	TCCGCAGGACGACGTGGCCG
Nr2f1	TGGGCCCAAAGATATGGCAA
Nr2f1	GAAGGCCACGACGCGGTCCG
Nr2f1	GCACGCCTCGCCCATGTCCG
Nr2f1	GAAGAGTTGCTCGATGACAG
Nr3c1	TAGGTGCCAAGGGTCTGGAG
Nr3c1	GACGGAGGAGAACTCACATC
Nr3c1	TATCCTGCATATAACACCTC
Nr3c1	TCTGTATGATCTCCAACCCA
Nr3c1	GTAGGTGGTCCACCAACCTG
Nrep	GTTTGCATACAAGGAAATGG
Nrep	GTGAATTCACGGCTGCCTGG
Nrep	AGTGAACCGAAAGAAGATGG
Nrep	TCGGTTCACTTCCTTAGGCA
Nrep	GGGAAGACTTCCCGTGCCTA
Nrg2	GAGCAGCATCGAGAAGCCGG
Nrg2	GCTCAAGTGTGAGGCAGCGG
Nrg2	GCTACAGTTCAACAAAGTGA
Nrg2	AGGCGTGTGCTACTACATCG
Nrg2	TCTGGCATGTACAATCGCAA
Nudcd2	TGTCCTGCGCGCGAGTGCCG
Nudcd2	TCGGCACGTGGCTCTGGCCG
Nudcd2	GCATTTGGTCTTGCACCCAG
Nudcd2	AATCTCAGGGAACTACACGA
Nudcd2	TCAGGGAACTACACGAAGGG
Nudt12	ATCGGGATGCCCGTTCCTGG
Nudt12	GAAGAGCTGGCATTGGCGGG
Nudt12	TACAAGTTCTGCCCAACCTG
Nudt12	AGACATGTGAACATGCCCGG
Nudt12	AACGAGGAGGGCATTGGCCA
Ocln	TAAGGAGGTGGACTTTCAAA
Ocln	CATAATGGGAGTGAACCCGA
Ocln	AGGCTATAGCCATTGTCCTG
Ocln	GGAAAGAGTTGACAGTCCAA
Ocln	TATGAAACAGACTACACGAC
Otp	TACACTTCACCGCCTCCCGG
Otp	GGGCGAGGACATCACCACCG
Otp	AAAGACCCAGACAAGCAGCC
Otp	CAGGCTGTCGCCCATGGCGG
Otp	AAGCCCATGGAGTTGGGCGG
P4ha2	GAAGCTCCAGGTGTTGGTGT
P4ha2	GAAGGAGTACATCCTTGTGG
P4ha2	ACACAGACTGGCCTGCACTG
P4ha2	GATCCGGACACGATTTCCAG
P4ha2	GCTCAGGTAGTCCAGCACCA
Paip2	TAACGGTCATTCTCATGAAG
Paip2	TTTCCAAGAAATGCTGGAAG
Paip2	CAATCTGAATCCCAATGCAA
Paip2	AGGAACAAACTCCTTTGCAT
Paip2	TGCAAAGGAGTTTGTTCCTG
Pam	AATAGGAGTGATGGGTCTGG
Pam	CAAAGAGTACTTACTCACGA
Pam	ACAGTGTCCATGCTGGCCCG
Pam	CATACCTTTAGGGAGCCGGG
Pam	TTCGTCCTTCAAGTTCACTA
Pank3	ACCTATTGACATCACAGCAG
Pank3	ACGGTGCTGAGTGCTACAGG
Pank3	TTGGTCCGAGATATTTATGG
Pank3	TGGTCTGCCAGGTTGGGCGG
Pank3	GAAACTGTTGGCATATGCTT
Parp8	GAAACCTCTGGCCGAGGCAG
Parp8	AACGTAGGTGAAAGTAAAGG
Parp8	ACGGTGGAAGAAGACTCAGA
Parp8	TCTGCGGTGAGAGAGCTCTA
Parp8	GGAGGAGATTGCTGTGGCCT
Pcbd2	TGCACAGTGGTTGACGGCAG
Pcbd2	CTGGCTTGAAAGCAGCAGGG
Pcbd2	AGAGAAGATGAATCACCACC
Pcbd2	AGACGTTGAACCATTCCGGG
Pcbd2	CAGGCCGCCACAGTCATGCG
Pcdh12	AGGGCAATGAAGCTATCCCT
Pcdh12	GGTGTCAGAAGATCTTCCCA
Pcdh12	AAATACTTGGCCAAGCCCGG
Pcdh12	TTACAGAAAGGTCCTCCTCC
Pcdh12	CGAGAGCCTCCGCAAAGCCG
Pcdh1	ATTTGGACTACAGGTAGCCG
Pcdh1	TCTGGCCCTCTAGCAGCCGG
Pcdh1	AATGCCAGAACCAGATCCCT
Pcdh1	AGTCAGCCAGGTGACAGCGG
Pcdh1	GATGCTCTGGGTGAAGACGG
Pcdha11	TTAGTGGTTAAAGCCACGGA
Pcdha11	CAAGCAGAAGCAGTTGACAA
Pcdha11	TGTTCAAGAGGACGCTCCAG
Pcdha11	TGAGAGCAACCAGGCACCAA
Pcdha11	GCTGGTCTTACTCTCAGCAA
Pcdha12	AAATGCATGCACCACCGCAG
Pcdha12	AGGGAAGTAATCGTGACCTC
Pcdha12	CATGCGCAGTCCCTTCCGCG
Pcdha12	CACCAGAGACACCAGCACCG
Pcdha12	GGAGAGCACAGCATCTTCGG
Pcdha1	GCGAGAACAAGAGCAGGCGC
Pcdha1	TTATTACTGACAGCCACCGA
Pcdha1	TTACTGACAGCCACCGACGG
Pcdha1	GAACTACAACCTCCTACAGG
Pcdha1	GTAGCGGTAGCAGTCAGCAT
Pcdha2	TCTGTCATTGGAAATCGCGG
Pcdha2	AGGGCGATGACAGCACCCAG
Pcdha2	TGAGGGCGATGACAGCACCC
Pcdha2	TTCAGCCCTAGCCTATCCCA
Pcdha2	AGAGGCCGAATACTTAGGAA
Pcdha3	GATGAGGAAATTAAGTCCCT
Pcdha3	TTATGAGCTGCAGTCAGCAG
Pcdha3	TGGACGTCTTCCCTTCCGCG
Pcdha3	GAATCCACCAAAGTCCGGGA
Pcdha3	GTGCTCCACAGCGCCCACGG
Pcdha5	GAAATCCCGGACTTCCTCGC
Pcdha5	AGAGCGATGACAGTCGCCAA
Pcdha5	TGTGCGCAGCCCGTTCCGCG
Pcdha5	AGACACCAGGAAAGTGGCCG
Pcdha5	AGAGGTTCCAACCAACACCC
Pcdha6	TCCTTTACTGAGAACACAGG
Pcdha6	TAAGCTACTGCTGACAGCCA
Pcdha6	CTACTGCTGACAGCCACGGA
Pcdha6	CTGCTGACAGCCACGGATGG
Pcdha6	GATCTGGACTCTGGATCCAA
Pcdha7	AAGGAACTAACCGTCAACTG
Pcdha7	ATGGCGGTTCGCCCTCCCTG
Pcdha7	GAGCTGCAGCCAGTTGCGGG
Pcdha7	AGAAAGCAACACCGTGGCTG
Pcdha7	TACCAGAGAAAGCAACACCG
Pcdha8	GAAGCGAAAGCACTAGAAGC
Pcdha8	GTGACTGTAGCAGTCAGCGG
Pcdha8	CAGGACATGGAGGTAGACCG
Pcdha8	GAGGAGTCCAAAGAAACAGA
Pcdha8	TCAACAACTCACCTTCTCGG
Pcdha9	TTGCTACTGACAGCAACCGA
Pcdha9	AGGGCGATTACAGAGCCCAA
Pcdha9	GATCAGCATGACCCGAGCCC
Pcdha9	CGATCAACATAGGTTCGCCG
Pcdha9	GGTTGCCCAACTCCTCCCGC
Pcdhac1	AAGGAAGCGAAAGTTCCGCA
Pcdhac1	AGAATGAACCGGGCTCCCGG
Pcdhac1	GCTGGTGCTAGAGAAAGCGC
Pcdhac1	ATAACAGAGGAGGAAAGCGG
Pcdhac1	TGAGAGACACAAGAGGACGA
Pcdhac2	GCAGGCGGGAGCCAGACCTG
Pcdhac2	GCTACGATACTCCGTGCCGG
Pcdhac2	TTCACTACCAATGTGCCCGG
Pcdhac2	TATGTGCAAGCTACTGACCG
Pcdhac2	GGTCACCAAAGTCATAGCCA
Pcdhb10	TGGAGAGCTGGCTATTAGGG
Pcdhb10	ATTGTAGCTACAGACCCAGG
Pcdhb10	GGAGCTAGTACCCAGAGCTG
Pcdhb10	AGGTTACTTAGTCACCAAGG
Pcdhb10	GTATGAGGTGTGTTTATCGG
Pcdhb11	ATAGTGGTTCCTGACCGAGG
Pcdhb11	ACTATAGTGGTTCCTGACCG
Pcdhb11	GTAGCCAGACTCCGCCTCCC
Pcdhb11	CAAACATAAGGACAGACAAG
Pcdhb11	AATGTAATGGTCCAGGAGGC
Pcdhb12	TAGCACTACCACACGCACGA
Pcdhb12	GGTGGCGCGGGATTCCACGC
Pcdhb12	TACAGAGTAATCACCCAGGG
Pcdhb12	AGGTACAGAGTAATCACCCA
Pcdhb12	GTCGGAAGAATAGGAAACAA
Pcdhb13	AATTCAGTATGCCATGCTGG
Pcdhb13	GCTCAGACTAAAGCTCACTG
Pcdhb13	CAGACTAAAGCTCACTGCGG
Pcdhb13	GGTGGCGCAGGACTCCACAG
Pcdhb13	GCTGTGCAAGAAGTTCAGAG
Pcdhb14	TTAAGGGAGTTGATTACCAG
Pcdhb14	GGCGCCCAGATTCTTTCCAA
Pcdhb14	GAGAAGGTGGAAATGGGCGT
Pcdhb14	GTGAGGACAAGGGAGCCCAC
Pcdhb14	AGGAGGTTACAGAAACACGG
Pcdhb15	TATCAGAAAGTACCACTCCA
Pcdhb15	ATCAGAAAGTACCACTCCAG
Pcdhb15	CAACACCAAGATTTGCACCA
Pcdhb15	GACGACAAGAGAAATTCAGG
Pcdhb15	GAAAGGGAGATCATTCGCAA
Pcdhb16	ACTGGTACTAGACAGAGCAC
Pcdhb16	AGGATGGTGGCTCTCTGCCT
Pcdhb16	TTACAAAGCACAGATCCCTG
Pcdhb16	GCTACACTCTCTCTGTCCAG
Pcdhb16	ACGAGGCGAGGGCCAGCTGG
Pcdhb1	GAATCATGGGAGCTGCGCGC
Pcdhb1	GAAATGCAACCTGTTACCCT
Pcdhb1	GCCGCTGCAGTCCTTCCGGG
Pcdhb1	GAGGAGATTGTCACTTCCGG
Pcdhb1	TATTGGCAAAGTCCACGCCG
Pcdhb2	AATTAGGCGCTATTCCGTGG
Pcdhb2	GGACCGCGAGTCATTTCCAA
Pcdhb2	AAGGGAGAAACTGGACCGGG
Pcdhb2	TCTTATGACAAACACAGCCC
Pcdhb2	GAGGGCCAGAGCCACCTCGC
Pcdhb3	ACACCGCAGAAATACAATGG
Pcdhb3	AGAGCTCAAGCTATCTCCAA
Pcdhb3	AGTTGAGAAATTGGACCGGG
Pcdhb3	AGGTCCACGGCATTTCCCAA
Pcdhb3	GTTGTACTTAGTCATCGCCT
Pcdhb4	GAGGCACGAGTCCATCACAG
Pcdhb4	TAGAGCGATTGTACAAACTG
Pcdhb4	TAATGTGGAAATCGCAGCCA
Pcdhb4	GTGGAAATCGCAGCCACGGA
Pcdhb4	GTAGGATCCAGCGCCACCTC
Pcdhb5	TGGAGGAGGCCTTTCTGGGA
Pcdhb5	GCAGGGCTTCGAATTCTACG
Pcdhb5	GGTCGCGCGCCACTTCAGGC
Pcdhb5	CATGGCTCACATCCACCAGG
Pcdhb5	ATACGGGAAATCTTCACTGC
Pcdhb6	AGGGCTCGAATCCATCACAG
Pcdhb6	GAGTGACTGTACAAATTCGG
Pcdhb6	AGAGTGACTGTACAAATTCG
Pcdhb6	TGTACAGTCACTCTATTCGG
Pcdhb6	GGTGCAGCACGACTCTTCAC
Pcdhb7	GATTGGTTGCAAGCACTCAA
Pcdhb7	GTTACCACTGAATTTAGCCC
Pcdhb7	GAAAGGCTTGGTAATAGTAG
Pcdhb7	AACCTGTTGGTTCAAGACGC
Pcdhb7	AGCGTCTTGAACCAACAGGT
Pcdhb8	TGTCAGGGAACTCTGGGAAA
Pcdhb8	TTCAAGAAATTGCCCAGCCA
Pcdhb8	CTTACAGTCACTCTATGCGG
Pcdhb8	AGAGCCTCTGAGCTGAGCGC
Pcdhb8	GAAGTTGTGCAAGAAGGCCA
Pcdhb9	AGGCTCTGTAACGATAGAGG
Pcdhb9	AGAGGGCCAGTTCCGGATCA
Pcdhb9	CAGCTCAGTGAAGGGAGCCG
Pcdhb9	ATCTTACTTACCTCTTCCAG
Pcdhb9	TAAGCACGTCCTCATCTTCA
Pcdhga10	TGTAAATGACAACAGTCCTG
Pcdhga10	AGTGACAGAAGATTCGCCGG
Pcdhga10	AGGGCTATGACAGTTCCCAC
Pcdhga10	ATCCCAGAGAACAATCCCAG
Pcdhga10	GAGTCAACGACACATTACTG
Pcdhga11	GCGCTGAGACTGATTCGCCA
Pcdhga11	ACAGCGGGATCAGCGCGCGG
Pcdhga11	GGAAGAGGAAATCGCGACCC
Pcdhga11	AGAGCAATTACTGTGCCCGA
Pcdhga11	AGGCACACCAGCCAATCCGC
Pcdhga12	TAGGGTGGGCAACATCTCCA
Pcdhga12	AGGGAACCGCATCCCAGCGG
Pcdhga12	AAGAGGGAACCGCATCCCAG
Pcdhga12	AACGCCACCGACCCAGACGA
Pcdhga12	GACGGTGGAGACCGCCGCCA
Pcdhga1	GAAATTTCCGGACCACACTG
Pcdhga1	AGTGACCAGCACCTTAGCTC
Pcdhga1	AGAGCAATTGTGGTCCCAGG
Pcdhga1	GATCAAGACGCTGATAACAA
Pcdhga1	AATGTGACTGTGGTGGACAG
Pcdhga2	GGGCGGCCCAAAGTGCGCAC
Pcdhga2	AGTGCAATTACCGTTCCCAG
Pcdhga2	AGGCAGAGTAGACCCTCCGG
Pcdhga2	AAGGACACATTGCTACTCAG
Pcdhga2	TCTGAAACAAAGCCTGGTGG
Pcdhga3	GATGACGCTGTTCACAGCCA
Pcdhga3	AGGCAATGAGATCAAGCTGA
Pcdhga3	AGTGCGATTTCTCTTCCAGC
Pcdhga3	TGTCACGCTCACCATAGCAG
Pcdhga3	CAGGAAGTTTCACTTACCGC
Pcdhga4	TGTGGTGGGTAATCTCGCCG
Pcdhga4	GGAAGAGGAAATCTTGTCCC
Pcdhga4	GATGTGCAAAGTGGACCGGA
Pcdhga4	TGTCAGAGGACACTATCCAG
Pcdhga4	GTCAGAGGACACTATCCAGG
Pcdhga5	TGTTCCGGAGAACACACCTG
Pcdhga5	ACTCCTCACACTCACCGCCA
Pcdhga5	GAAGTGGTAGCTCAGGACGG
Pcdhga5	TGTGACCAACACCTTAGCGC
Pcdhga5	ACAGTGACCGTTGTTGACCG
Pcdhga6	AAGCAGGAGCAACTCGCAGC
Pcdhga6	GATTCCTTCATCCTGGTCGG
Pcdhga6	ACTGTGACAGCCACTGACAG
Pcdhga6	AAGCCTTACAATCTACCTGG
Pcdhga6	AAAGAAGATGCACGAAACAG
Pcdhga7	GTGCTGCTCTCCATTCTCCT
Pcdhga7	TGCTGCTCTCCATTCTCCTG
Pcdhga7	AGGCTGCAGTCCCAGATCCT
Pcdhga7	ACACTGAAGGCCACAGATGG
Pcdhga7	GGTCCTGTACAACCACCACA
Pcdhga8	GAACCAAAGACACTTCCGTG
Pcdhga8	TTTGGAAATGTACCGAGCGG
Pcdhga8	GATGTCAAGAAGCGCAGCGA
Pcdhga8	GAAGCAATCCGACTACCGCC
Pcdhga8	ACTATGACCAGCTTCTGCGG
Pcdhga9	GAGTGGATACCTTGCTCCGG
Pcdhga9	GGAGTGGATACCTTGCTCCG
Pcdhga9	AAGGAGGATTACTGTCCCTG
Pcdhga9	AAAGGAGGATTACTGTCCCT
Pcdhga9	GGCTCAACTGAACTGCACAG
Pcdhgb1	CATCCACTACTCCATTCCGG
Pcdhgb1	ATTCCGGAGGAGCTAGCCAA
Pcdhgb1	CTGTGAGTCAGCCTTAGCAG
Pcdhgb1	GGTGTAGAAGCCAAGGACGG
Pcdhgb1	AAGGACATGAATGTCACCTC
Pcdhgb2	GATAGTAGGAAACCTCGCAA
Pcdhgb2	CTGGTGGTACATCCTCCCGA
Pcdhgb2	AACAGGAGAAATCACGACAA
Pcdhgb2	AAGGCGATGACTGTTCCTAG
Pcdhgb2	ATTACGTTAGAGGAGAGCGG
Pcdhgb4	GGTGGCCACAGACCAAGACG
Pcdhgb4	GATGATTGCGCAATGTACGG
Pcdhgb4	TAATGGAGGATGCTGAGCCA
Pcdhgb4	ACAATTTGCAGATTCAGCGG
Pcdhgb4	GAGGAAACTTACCTGATGGG
Pcdhgb5	GTCCTGACAGCCTTAGACGG
Pcdhgb5	GTGGAAGCGCGGGATGGCGG
Pcdhgb5	GATTCCAGAGAACGCACCGC
Pcdhgb5	AAAGCAATTAGTGTTCCCGG
Pcdhgb5	TGAAAGCAATTCCAGACCGA
Pcdhgb6	AGACATAGAGAGGTACACCA
Pcdhgb6	GAAGTAGAAGCGAAGGACGG
Pcdhgb6	AGGACAACCACCACTCCCGG
Pcdhgb6	GTTTCTCTCAACTATAGCGA
Pcdhgb6	GTGTTGTCAAATCATCTCCA
Pcdhgb7	AAGTGAATCCGACAGCCCAG
Pcdhgb7	AAGGCAATGGATCAAGACGA
Pcdhgb7	GATGTGGAGGCAAAGGACCG
Pcdhgb7	AGGGCCACAACAGTTCCGGA
Pcdhgb7	AATACTAGCCAACAGTGCCG
Pcdhgc3	TTTGAGTGAGATGGTCGCAG
Pcdhgc3	TCTGCTAGCTGCCTTAACCG
Pcdhgc3	GTTGGTGGTAGAGAACCCGC
Pcdhgc3	GATTAGCGAGGCCTTGGCGC
Pcdhgc3	GACAAAGGTGCCAATCCCGA
Pcdhgc5	TGGTGGAGGAGTCTGAGCCG
Pcdhgc5	TCAGCTAGTACTCACTGCCG
Pcdhgc5	ATGCCAGCAGCACTTCAGGG
Pcdhgc5	AGATACAAGGAACAGTCCGG
Pcdhgc5	TGTCAGCTAAGTGTCTGCGG
Pcsk1	GTTTGTTAATGAATGGGCGG
Pcsk1	TATTACATGAAGGTCCAGCT
Pcsk1	AGTTCAATTGGATTCAACCC
Pcsk1	GGAGGCACTGCTGATAGAGA
Pcsk1	GCAAAGATACCAGCAGCCAG
Pcyox1l	AGCGGCGGTGGTGAGGACTG
Pcyox1l	ATAGACGACAATTTGCACTC
Pcyox1l	AGAGGCGGAAGAGATTCAGC
Pcyox1l	TCACGGCTATGCCTTCTCGG
Pcyox1l	TCAGGGCAACCTGTGGTCCG
Pde4d	TGAGAGCCGCACCATGGAGA
Pde4d	GGAGTGCAGTGTTTCCTCAG
Pde4d	TGTGGACAATGGCACATCAG
Pde4d	AGGGAGAGGAGCTTACTTGC
Pde4d	GTTGGAGGCCATCTCACTGA
Pde6a	CATGGGTGAGGTGACAGCAG
Pde6a	GGATGTGGTAGCCATAATCA
Pde6a	TATAGAGAGGCAGTTCCACA
Pde6a	AAGAAACTTACCCTTCCGTC
Pde6a	GACCACTCACTAGAGCCCAG
Pde8b	GCTGTCACTCACCTTTGTGA
Pde8b	TCATCTTTGGTTCCCAGCTG
Pde8b	GGAGAGTCACCACACAGCCC
Pde8b	TGCTGCCACAGTCCACGACG
Pde8b	CAACAAGCCACTGGCAGCTG
Pdgfrb	ATACCAGCTTTAGTCCTCAG
Pdgfrb	TGAGAACAAACTCTGGCCCA
Pdgfrb	GAAGGCGAGGCTCACCCTGG
Pdgfrb	CCGGCATTACCTTCATGCGG
Pdgfrb	TGATGGCTTTCTCATCGCCA
Pdlim4	GGTCGGACTCACCCGCGAGA
Pdlim4	GGATCAAGTCACCTGGGCAC
Pdlim4	ACAGGCCTGAGAATAAGAAC
Pdlim4	GAGGACAACAGATCGGGCCT
Pdlim4	GGCATGCTAGAGGCTGGCGA
Pelo	GAATGAGTATGTCAAGATGG
Pelo	GCGCGCCTCCACCATCCGCA
Pelo	CGTGAGGAAGGATATCGAGA
Pelo	GGAGAGGGCCAACGAAGCCT
Pelo	CAGGGAGTACTTGTGTCCAG
Pfdn1	CTTCAACTCCAGATCCACGG
Pfdn1	CAACTCCAGATCCACGGAGG
Pfdn1	GATGAGACTAACATGTACGA
Pfdn1	GGACACGGAGATCATGACGC
Pfdn1	GGGAGATGCTGATGGCGCGG
Pggt1b	GAGCAGCATGGCCACCACCG
Pggt1b	AGAGTGGATCTACTCCCTGC
Pggt1b	ATGGATTGAATGGAATACCC
Pggt1b	CACGGCCTAAGTCATCTCCA
Pggt1b	AAGGCAGTGAGAATGACATG
Phax	TTTGCAGAGGCCTATCGCTG
Phax	TAAACATGTGGACTCCAGCG
Phax	AAAGGCCATTGAACTTCTGA
Phax	AGCCGAAGAAGAACACCCGG
Phax	AGATGTCCAAGTCCTGAGGG
Pik3r1	GAAGACATTGACCTACACCT
Pik3r1	ACTGCTCGGCCAGGTCAGGA
Pik3r1	GAAGCTGTCGTAATTCTGCA
Pik3r1	GAGATGATGTCTTTAGCCCA
Pik3r1	TTCATCCTTCACTTACCTGG
Pitx1	AGTTCTCCAGCGGCTCCCGG
Pitx1	GAGCCTGGAGAGGCTACCGG
Pitx1	CTAAGAAGAAGAAACAGCGG
Pitx1	GCTGCAGACAAGGAGCGCGG
Pitx1	CTTGGTAGACAGCGGCGCCG
Pja2	GCATAAGCTTCCTTACCTGA
Pja2	GGAACTAGACGATGTTCCAA
Pja2	GAGTTGGTAATACTCTCCGC
Pja2	CAAGAGTTGTCTCTTCAGGA
Pja2	GGATGGGAACAACAACCTTG
Pkd2l2	GGTATGCTCCGCGATGTCTG
Pkd2l2	GGAGGTTAACACCACACTCG
Pkd2l2	AAACTCAGTTATGCTCCGAA
Pkd2l2	CTGCTACAGCAAGTACACAG
Pkd2l2	GTTGGCGTATACCGAGATGG
Plac8l1	TGGGACATCATTTCTCCAGA
Plac8l1	GCAGCCATTGTTCAGACTGG
Plac8l1	GTGGTGAAACAGCCGATCCG
Plac8l1	AAGGTAGACCCTGGTAACAG
Plac8l1	CCACCACACAGTCTTCACAG
Plk2	GCTCTGGGCAAAGCTTGCGG
Plk2	GAGTAGCTAAACCTCATCAG
Plk2	CGAACAAGAAATCTTGCACA
Plk2	GAAGGTGGGAGACTTTGGTT
Plk2	GTCCTCAACAAACAAGGACA
Poc5	TTAGATGTCTTCCTACCTGA
Poc5	TGAGGCATACCAGCTAGCGT
Poc5	ATGCCCATGAAATAAATGGG
Poc5	GACCTCATCCTTTCTCCCGA
Poc5	TGACATGGCCGATCCTCCAG
Polk	AAACGATAACAAAGCAGGCA
Polk	AAATTACCAGCCAGCAACTA
Polk	GAGGGACAACCCGGAACTGA
Polk	CTTCGAATTACCATGCAAGG
Polk	GGAAAGGCAAGATTGGCCTG
Polr3g	ATCACACGTACAGGAAACAG
Polr3g	TGGCTGGCAATAAAGGAAGA
Polr3g	ATAGGATACAGACTACAAGC
Polr3g	ACAGGAGGACTACGATGAAG
Polr3g	TGTAGACAGCGACGACAACA
Pou4f3	AAATTCTCCAGCCTACACTC
Pou4f3	TCGGCGCATGGCCTCAGAGC
Pou4f3	TGGGAGACAAACTCGGCGCA
Pou4f3	GAACGGATGATTCTTGCCGT
Pou4f3	ATGCGGGTGACTCATGCCCA
Pou5f2	TCATAAGGTGAGGAGCCCAG
Pou5f2	AGAGATGGAGCAGCTAGCCA
Pou5f2	CAACCAATGATACCTCCCGG
Pou5f2	AACCAATGATACCTCCCGGA
Pou5f2	GCCATGGGAAAGCACACTGG
Ppargc1b	GCCGCGGCTGGAAGATGGCG
Ppargc1b	AGAGCTTGACCTCTCCCAGC
Ppargc1b	AGAGCGTCAGAGCTTGCTGT
Ppargc1b	GTAGCGAATGAGCTGTACCA
Ppargc1b	TTTGTGACAAGGCCAGCATG
Ppic	GATCACCTTGTCCGTCACCG
Ppic	AAACGTTGTACCCAAGACGG
Ppic	ACAGCTAGAGATGGCACTGG
Ppic	AAACTGAAGCACTATGGCAT
Ppic	TATCTTGCCACTGTTGACGA
Ppip5k2	GGATTTGGATTTCTTTGCCA
Ppip5k2	TAGGCAACTGCTTTGTCCAG
Ppip5k2	ATGTGCATAGTCTGGACCCA
Ppip5k2	GAACGTCTGCATTACCTCCC
Ppip5k2	GTTTCTAGAGGACAGATGGA
Ppp1r2	CGGCCTCAACGGCCTCGCAC
Ppp1r2	CGAGGCCGTTGAGGCCGCCA
Ppp1r2	GCGTCACGTTACTTGTGATA
Ppp1r2	AATGACCTACCTCGCTCCTC
Ppp1r2	TGACCTACCTCGCTCCTCAG
Ppp2ca	GGACGAGAAGTTGTTCACCA
Ppp2ca	ACATCGAACCTCTTGAACGT
Ppp2ca	GAGCGCATCACCATACTCCG
Ppp2ca	TAGATCTTCTGTCTACACGG
Ppp2ca	TCATGCCAATGGCCTCACGT
Ppp2r2b	GAGGTCTGAAGATATAAGGC
Ppp2r2b	TACGGTAGAATTCAACCACA
Ppp2r2b	AACTCTCCTCCACATACCGT
Ppp2r2b	GGGCAGTGACACTCACCCGC
Ppp2r2b	GATGTGGTACGTGTGCGCAT
Ppwd1	CTGGGTCGGGCCTTTACCGG
Ppwd1	GCTCATACATGGATGCACTG
Ppwd1	TGTGAGTGGATATATTGCCC
Ppwd1	GAGGCAACAACTACCAGACA
Ppwd1	ATGGCAGCTACTCAAGCTGA
Prdm6	TTTGAGGAAGGCCGAGCCGC
Prdm6	GTACACAGGCACACCTCCCG
Prdm6	ATTGTACCACACCAGGAGCT
Prdm6	GCACATGGCTTCCATTACGG
Prdm6	TTTCCCAGCCGTCAGAACTG
Prelid2	GAGGGACTGATACCTTTCGG
Prelid2	AAGGCGGGTGCATGACATGG
Prelid2	GGACACAGTATGCATCCATG
Prelid2	AGGCCGAATTTCAATCACGG
Prelid2	ATGCTGCTAAAGGAACAGTG
Prob1	CCAGAGATAGGCCCATAGGC
Prob1	GGAGGCGCAGAAGCAGCTCG
Prob1	GCAGTTGCAGGAGCCACAAG
Prob1	TCTCAAGGACTTTCTGCCTG
Prob1	GCCGCCTTGAGAGCCCAGGA
Prr16	AGAATGTCAGCCAAGTCCAA
Prr16	GGAGCAGATCAAGATCATAG
Prr16	GCAGATCAAGATCATAGTGG
Prr16	TTAAACCGAACTCGTTCCCG
Prr16	AACCACAGAAGACCATCCTG
Prrc1	ACCTGAGTGAGCTTCAGTGG
Prrc1	TACAACCTACGACATCACGA
Prrc1	GAAGATCCCAGAATTAACAG
Prrc1	AGAAAGCATGATCACCACGC
Prrc1	TAAGCCAAAGACCTCCTGGA
Psd2	AATGGAACAGCAGCCAGCGA
Psd2	ATGGAACCCATTGGGCACCG
Psd2	GCCGAGCTACATCACAGCGC
Psd2	GTTCAGCAGGCTGGTTGCTG
Psd2	GAAGGCCTTCCCGCTGATGG
Ptcd2	GGAGCCTGAGCCCGTCACCC
Ptcd2	TATAACCTACCTGGCACCAA
Ptcd2	CCAGAACAAACTCATCTTGA
Ptcd2	GGACCTGGAGGACTCTGCAG
Ptcd2	TTAAGGGAGACATTATCTGC
Pttg1	CATCCTTAGATGCCAAACGG
Pttg1	TTAGATGCCAAACGGCGGCC
Pttg1	CGTGCCTAAAGCCAGCAGAA
Pttg1	TGAGAGGCACGCCATTCAAG
Pttg1	TCTGCATCGTAACAAACAGG
Pura	GGCGGAGCGCAGCATCATGG
Pura	ATCATGGCGGACCGAGACAG
Pura	TCCGCCAGACAGTCAACCGG
Pura	CGAGGGCACCTCCTTGACTG
Pura	CAGTAGCAGGGTGGCAGCGG
Pwwp2a	GGAGCTGGCCGATAGCTCCG
Pwwp2a	GCGGTGTCGCACCTCATCCC
Pwwp2a	TGACCCGCACCTCCGAGCCG
Pwwp2a	GAAGGCCCGGAAGAGTCCGC
Pwwp2a	TGTGTCCTGAACCTCACCGG
Rab3c	ACACGAGGCGCCCATGCAGG
Rab3c	TTTGCCTACAATGAGACACG
Rab3c	CGAGCTGTTCTCCTAAGCGC
Rab3c	ACCGAGAGAGGCCAGCGCTT
Rab3c	GACCGACCCAGCCATCACAG
Rad17	ACCAAAGGTGTCTTCCACAA
Rad17	GTCTGTCCGACAATGAGCCG
Rad17	GTTGTCTTTCCACATCCTGG
Rad17	TCAGTGGAGACAATAATCAG
Rad17	CAAGAGATTCAAGCTATTGG
Rad50	GATTTCCCTCCTGGAACCAA
Rad50	TTGCTCAAGAAACAGACGTG
Rad50	AGCCCAGTTAGCGTCTTCGC
Rad50	GGAGAGCCGAAAGAAACAAA
Rad50	AAGGGAGAAAGAAAGGCGCC
Rapgef6	TGCGGACATGAACTCGCCCG
Rapgef6	ACCTAAGCTGATGCTCCCTG
Rapgef6	CAAGTACAGATCCAGAAAGC
Rapgef6	CTGCCAGACAGTCTCGACGA
Rapgef6	GAAGACACATGCGTCACCTG
Rars	TGGTGGCTCAGTGCTCCGCG
Rars	CATCACCTGAGAAATACCCA
Rars	GTTACAGATGCTCAAGGCAA
Rars	TGTGCTTGGAGACAAGGAGA
Rars	ATCCTGCAAATTCAAAGAGG
Rasa1	GTGCCGGGTCAAGTTACCCG
Rasa1	TTATAAGAGAGAGTGATCGG
Rasa1	TGAAGACCTAGTGGAAGAGG
Rasa1	CGAGAAGAAGATCCACACGA
Rasa1	TCTCCAGGAGTATTATCTGA
Rasgrf2	AAGAGCGTGCGCTACAACGA
Rasgrf2	ACTGGAGCTGCGCTGTGAGG
Rasgrf2	GTACCACGTCCATCAAGAGG
Rasgrf2	ACAAATGTAGTCCTGCACGA
Rasgrf2	TCAAGGACTAAAGGCAAGGC
Rbm22	TGGGTTCCAACACCTACAAC
Rbm22	AGTGTTTCGCTGGTGCCCTG
Rbm22	CTTGAGGAGCATGTCACTGG
Rbm22	CAGACCGCCGACGTACAGGG
Rbm22	CTTGTTAAAGGACTTCTCAG
Rbm27	TAAGAACTACCTTCCACCAT
Rbm27	GTTCAGAATCTAGTGAACGA
Rbm27	AAGAGCAGGAGTAAGAGCCG
Rbm27	AGGCGCTGCAGAGATTACGA
Rbm27	GGAGGCATTAACATTCCGGG
Reep2	ATCTGTAAGTGTCTCAGCTG
Reep2	GGACAACAGCCATATCACAA
Reep2	GATGATGAGGGTGGGCAAGA
Reep2	AATAGTGTCCAGGAGACCCA
Reep2	TGGGAGACAAGGCACCCAAG
Reep5	GATGAAGCTCCGGTTCACTC
Reep5	GAACCTCTCCCTCATGGCTG
Reep5	CGAAACCTATCAGGTTGCAG
Reep5	TATCAGGTTGCAGAGGAGAG
Reep5	CCAGTGGCTGACGTACTGGG
Rell2	GGAAGAAGACCAGCACAAGC
Rell2	TGTGCTGGTCTTCTTCCTCA
Rell2	TGAAGCCTACAAGGCCCATG
Rell2	TGAATGAGGACACAGTAGAG
[truncated: 689 more rows]

## Sheet: Chr6p gRNAs
Mouse Homolog	gRNA Sequences
2300002M23Rik	ACCAGGAAGTAGCC				Total gRNAs	4160
2300002M23Rik	ATCAAGAATGAGGG
2300002M23Rik	CGAATCAAGAATGA
2300002M23Rik	CCTCATTCTTGATT
2300002M23Rik	CGGGTGCTCTATAA
2300002M23Rik	CTTGAAAGTTCCTG
2300002M23Rik	ACACCCAGTTCCTC
2300002M23Rik	GACCAACAGGATAA
2310039H08Rik	CTGGAGGTTAACCC
2310039H08Rik	AGAAGCTGCAGCCT
2310039H08Rik	CATGAGATGTGCTG
2310039H08Rik	AGGCTGCGCGCTCA
2310039H08Rik	TGCTGCGGTGGGTG
2310039H08Rik	AGATGTGCTGCGGT
2310039H08Rik	CAAGACGACCCTCC
2310039H08Rik	AGACAAGTGTGAGG
9130008F23Rik	TAAGTCCTAGGGAT
9130008F23Rik	GCGGCTAAGTCCTA
9130008F23Rik	ACTGTGTTTGAAGT
9130008F23Rik	GGTGGAGATCAATA
9130008F23Rik	GAGGCACTGACTAG
9130008F23Rik	CTCACTAGGCAGTT
9130008F23Rik	GTGTTTGAAGTGGG
9130008F23Rik	CAAACTGCCTAGTG
Aars2	AAGTCCCCTTCTTG
Aars2	TGGAAGACTTGGGG
Aars2	TGAAGCAGGTTCTT
Aars2	CGGGTGGAAGACTT
Aars2	GTGTGGGTGCAATT
Aars2	CGGCCCCTGGCGGG
Aars2	CAGAATACAGATTT
Aars2	CTTCCCCTGGCGAG
Abcc10	TTGAGGTACTTCCG
Abcc10	GGGCGGGGATTCAG
Abcc10	GTGCGGGAGACAGG
Abcc10	GCGCCACGATGCTA
Abcc10	GCGCTGCCAGGTCA
Abcc10	GCTGTCCCCGGGGC
Abcc10	GAAGTCGCTGTCCC
Abcc10	GCAGCACCCTGACC
Abcf1	CACTCCAGTCAAGT
Abcf1	GACACGTGGGGCAA
Abcf1	TCCGCCCCGACCCG
Abcf1	GGGCGGAGCCTACA
Abcf1	GCGTGGCGGCATTG
Abcf1	CGGCATTGCGGCTT
Abcf1	GACCCTCCGCGGGT
Abcf1	TACTTGACTGGAGT
Abhd16a	GTGTTCAGCGCAGT
Abhd16a	GCCCGTAGTCTCCT
Abhd16a	GCGGGGACGGCAGT
Abhd16a	GCAGTGGGAGTCTC
Abhd16a	GCCCAGGAGACTAC
Abhd16a	CAGGAGACTACGGG
Abhd16a	TGCCACGGGGCGAG
Abhd16a	GTTCTCGCCACGAG
Abt1	cgaggcCAACAGAC
Abt1	GGACCCAGGTCCTG
Abt1	TGAGGAGAAGGGTT
Abt1	CGGAAGTATTTTAC
Abt1	CTGGTGCCTCTCGT
Abt1	agacagactgggcg
Abt1	CAGGACCTGGGTCC
Abt1	Tgggtgcggagggg
Acot13	ACGGGGACCAGAGA
Acot13	GCCGGAACCTGCGC
Acot13	GCGAGGCGCAGATg
Acot13	GCGCTAAAGAGTGA
Acot13	CCGCGTCAACCTTC
Acot13	CTGGGGACCATCGT
Acot13	AGCAGCACAGGCGG
Acot13	GCCCGAAGCAGCAC
Adtrp	GCAAAGCAAGAGAT
Adtrp	CCACCAGCCCCTGA
Adtrp	GGCCAGGACAGAGA
Adtrp	CCTCAGGGGCTGGT
Adtrp	GAGTGGATGATCAA
Adtrp	AGGACAGAGAGGGT
Adtrp	TGCCGGGGTTCCTT
Adtrp	GAGGCCAAGCAGGG
Ager	ACTCGGTGGGTTGA
Ager	GAGGTAGTGCCCAG
Ager	TGATGGAACTCGGT
Ager	AGAGCCCTACCCCA
Ager	GCAAGCCCCACCTA
Ager	TCTCACCCGACCTG
Ager	GACAAGAGTCCTTC
Ager	ACATCTTTGTACTG
Agpat1	CACTGAGCTCCCTG
Agpat1	CGGCAGGCATGGGG
Agpat1	GCCCGGCAGGCATG
Agpat1	CCCAGGGAGCTCAG
Agpat1	GCCGGGCCTCTCGC
Agpat1	GATGAGGCTGACCG
Agpat1	AGCAGGCGCTGGGA
Agpat1	GGAGCCGGGGTCAC
AI661453	CGCGGGTTCCCTAC
AI661453	CGGGCGTGCCGGTA
AI661453	CGGTAGGGAACCCG
AI661453	TCTGCTCCCCAGCA
AI661453	GCAGGGCGTGGGCC
AI661453	GATCTGCTCAGGAA
AI661453	ccgcccAACTCCCC
AI661453	CGGAGGACCTCGCC
Aif1	GAACGGGTTGAGAG
Aif1	CTAGGTgtgttaca
Aif1	CCGGAGGTGTGGAA
Aif1	AAAAATTACTTTGG
Aif1	CTGGGAGTTAGCAA
Aif1	GTCTGCTTCTTTGG
Aif1	GGCACCAGGATCTG
Aif1	gagcgtgataccct
Aldh5a1	GAGAAGAACGTGCG
Aldh5a1	TCCGACATTGAGAA
Aldh5a1	CAACCGTTCAATTA
Aldh5a1	TGAGCTGTTGAGAT
Aldh5a1	AAGCGGGAgcccgg
Aldh5a1	ATCTCAGGGGTCGC
Aldh5a1	GAATTCATCTTGCT
Aldh5a1	ACCGTTCTCAATGT
Ankrd66	CTTGCTGAGAGCTA
Ankrd66	ACCCACAGCATCTC
Ankrd66	GATGCAGGAACCTA
Ankrd66	CAGTAGTTTTGAGT
Ankrd66	GGGAGCACTAACTA
Ankrd66	CAAGTCACTGATGC
Ankrd66	GGTGAAAAGTTAAG
Ankrd66	GGGAACTCTGAAAG
Anks1	CCCGCCCACTAGGT
Anks1	cTTGCCCACCTAGT
Anks1	GCCCATTCGCCAGG
Anks1	GGAGCCTCGGTGTG
Anks1	CACTAGGTGGGCAA
Anks1	GAGCCCCGCCCACT
Anks1	CGGCGCCGCCGTGC
Anks1	GTGACGCCGGATCC
Apobec2	AGACGGGGTAGAAT
Apobec2	TGGGTAAACGAGAG
Apobec2	CCCAACGTGGGCGG
Apobec2	TGCTGATAAATAGG
Apobec2	CTGACAGGGTGACA
Apobec2	GTTGGGGGGAACTC
Apobec2	CCGCCCACGTTGGG
Apobec2	ACTCAGTCGAGTCT
Apom	GCATCCGGAAGAGG
Apom	GCTGCGATGAGAAG
Apom	GGGTTTCTACTGTA
Apom	ACTGGGTCATGCCC
Apom	GGTTAAAGGGTCAA
Apom	ACCCAGTGACTCTG
Apom	CAGCATGGAAGACT
Apom	TCTACAATATACCC
Armc12	TCAGAGTGGTTCAG
Armc12	AGGGGTAGAAGGGA
Armc12	GTCAGAGACTCTAG
Armc12	AGGGCCCAGAACCA
Armc12	AGTGGTTCAGAGGA
Armc12	AGATGACGGGGTCC
Armc12	GCACTAGGCAACAA
Armc12	GAAGGTGCTACTTT
Atat1	AAGGGGTGTGAGAC
Atat1	CCAGTGAACAGCTG
Atat1	TACCCGCAACTCCA
Atat1	AGGACCCGCCCCGA
Atat1	GAAGTCTATGAGGT
Atat1	GCCCTGGCATCTCA
Atat1	CACAGACCTACAAA
Atat1	AGGGAGTCAAGAAC
Atf6b	CGGGCCAATGGCAC
Atf6b	CTGGATCGGTAAAG
Atf6b	GCATGCCGGGCCAA
Atf6b	TTCTGGGGCCTGTA
Atf6b	CCGTGCCATTGGCC
Atf6b	TCTAGCCCAGATGC
Atf6b	AACACGTGACACGA
Atf6b	CGCACAGTCTCGCC
Atp6v1g2	CGCTAAGACCCAGT
Atp6v1g2	GAGGGCAGAGTGTT
Atp6v1g2	GTGGAGACACAGTT
Atp6v1g2	TCTCCGTGTCACCA
Atp6v1g2	GAGGAGATCTTGGT
Atp6v1g2	CACCCACCCGGTGC
Atp6v1g2	AGACTGAGTGAAAA
Atp6v1g2	GGACCCTGGTGACA
Atxn1	GGATCCTTGAGCTG
Atxn1	GGATCCGACTTCAT
Atxn1	CCGGGTGCATAGAA
Atxn1	GCATAGAAGGGTTA
Atxn1	TTGAGCTGCGGCGG
Atxn1	AACTGCTCCATATT
Atxn1	GCAGGGTGCAACTC
Atxn1	GAGAGAGAGCGCGA
B3galt4	CGGAAGCCGACAAG
B3galt4	GCACGCGGAATACC
B3galt4	GGACGGACCGGGAA
B3galt4	TGCAGCAAACTGGG
B3galt4	GCAACCACTGTTAA
B3galt4	TAGAGAGGCATGAT
B3galt4	GAGACGGAGGTCAT
B3galt4	GCGTGCTTTACAGT
Bag2	GCCTGCCTGGTCAC
Bag2	GGCACGCCAGGGTG
Bag2	GTGCGGCCAAACAA
Bag2	GGCGCCCGTGGTGA
Bag2	CAGCCCGTGAGAAG
Bag2	AGCAAGGACGAAGT
Bag2	GGCAGGCTCGGGAG
Bag2	TTGCTGTGAACCGT
Bag6	GAGTGCAACCGGAC
Bag6	CCGGGCGACGACGG
Bag6	CAGTGCGGTCCCCC
Bag6	CGGGCCGGCCGAGA
Bag6	CAACCGGACCGGGG
Bag6	AGAAACTCACTGTT
Bag6	CGAAAGTAAATCGG
Bag6	ACATAGCCGGAGGG
Bak1	GAAGGTCCTCGGCC
Bak1	TGCTGCTTAGGGGA
Bak1	CTAGAGGAAGTTCT
Bak1	GGAGGCTGCTGCTT
Bak1	TAGGGGAAGGTCCT
Bak1	GCAGGCGCTCAGGG
Bak1	CCTGTCCCAGCCAA
Bak1	GAAGGCAGATAggg
BC004004	cggggcAAATCTCG
BC004004	CCATCTGGACGTCA
BC004004	GCTCCTTGCGCCCC
BC004004	ATCTGGCGAGGTcg
BC004004	GCAGTAGTGCCATC
BC004004	AGCCAAGTGTAAAT
BC004004	TTCCGAAACAGATC
BC004004	AAGCAGGAAGTTGT
BC005537	GACGCTACCATCTG
BC005537	GCGTAGAGCGCTCG
BC005537	GAAAAGAAGCGTGA
BC005537	ATGGAGGGCGTAGG
BC005537	GGACAGCCTGACGG
BC005537	GCCTGCGCGCGCCC
BC005537	TGGCAAAAACTGAA
BC005537	TAGAGCGCTCGGGG
BC051142	CTGTGCGAGAGCAA
BC051142	GTTCCTAGAGGTGA
BC051142	TCTTGATTGGACCA
BC051142	AGGGAAGTTCCTAG
BC051142	TAACAGCTTTATGT
BC051142	TATGAAGATTACTG
BC051142	AGCAAAGGAGGTGA
BC051142	GAAGATTACTGGGG
BC051142	GGAGCAGCCATCCC
BC051142	GCAGGTGTTGAATC
BC051142	CCTAGAGCTGGAGA
BC051142	GACGGTATTAAGTC
BC051142	CTGGTCCAATCAAG
BC051142	GAAGAATACCAGGG
BC051142	GTCATCAGTTACCA
BC051142	GCTCTTATCTTTAT
Bend6	CCCGGAACGACTGA
Bend6	CGAGAGCTGCGCGC
Bend6	CGGCGCACgtgggg
Bend6	ACgtggggcgggac
Bend6	AAGCCGGCGCACgt
Bend6	CGGCGTCCTGAAGC
Bend6	GCTGGGAGCATCAT
Bend6	gcggggggctcggt
Bloc1s5	GCCATGCTGGATGA
Bloc1s5	AGATGATCTGCGTA
Bloc1s5	GTTGGGTTCGGGGA
Bloc1s5	ATCGGCTACACTCC
Bloc1s5	CGATGCGGCCATGC
Bloc1s5	GCGTCGGAGTCGTT
Bloc1s5	GAGTCGTTGGGTTC
Bloc1s5	CATCCTACGCCGGT
Bmp5	GTGTACGCGTTCCA
Bmp5	ACAACAGTGATCTA
Bmp5	TACGCGTTCCAGGG
Bmp5	TGTTACTTGAAAAC
Bmp5	TAAAATTGCGAAAA
Bmp5	AGTTTTCAAGTAAC
Bmp5	AATAATCTCAAGTA
Bmp5	AATGGAGGCTTTTC
Bmp6	AGGCCCTGGGAGAA
Bmp6	ACCAGCCAATGGAG
Bmp6	ATCAGGAGTTGCTT
Bmp6	TGCCTAGCGAGCGT
Bmp6	GCCCTACTCGGTAA
Bmp6	ACTCGGTAACGGAC
Bmp6	AGGAGTTGCTTGGG
Bmp6	TGGGCGGGTAAGAA
Bphl	GAGTCCAAGGATAT
Bphl	GCTTGCAACTGCCA
Bphl	TGCCTTCACCTAAA
Bphl	ACCCTGAGAGAGCT
Bphl	AGTGGGACATAGTc
Bphl	TGCCAAGGAGTCCA
Bphl	TAGCTCTCTCAGGG
Bphl	GAGCTAGGACTAGA
Brd2	CGCCGCGGTGGGGA
Brd2	GCAGGAGCCATTTT
Brd2	ACCTCGTTGAGCGA
Brd2	GACAGCGTAGGGGA
Brd2	GCGGCGGGGGGAAT
Brd2	CCAGCCAGTTCTCA
Brd2	ACGAGGTGGCCCCG
Brd2	GAGGTGTGTTCTGG
Brd2	TGGGACCACAGCAT
Brd2	GACGCCTCCGAGGA
Brd2	AGGGCGAGCCTCCC
Brd2	AGGTGTGCACGTCT
Brd2	ATCGCTCAACGAGG
Brd2	CCAAGACAGCGTAG
Brd2	CCCTGGAACGGTGG
Brd2	GACAGCTCCCAAAA
Brpf3	AAGCGCGGGGAGAC
Brpf3	GCCGCACGCGAAGC
Brpf3	GCTCGATCCGGGGA
Brpf3	CGGGGAGACCGGAG
Brpf3	CGGGGAGGGAGTGA
Brpf3	GCGCCACCTCCACG
Brpf3	gggggcATCCGCTC
Brpf3	CGGGGCACCGTCCC
Btbd9	GCCCCTCCAGTACT
Btbd9	GCGTCACTTAGCAA
Btbd9	GCCTGAGGCGACCT
Btbd9	GGGCCCAGTACTGG
Btbd9	GCCAGGTGTCGGCA
Btbd9	GTGGCTCCGACCTG
Btbd9	AAGACCCCCGCCTG
Btbd9	GCCCTGCCGACACC
Btn1a1	GAATATAGGGAATG
Btn1a1	ccccccatgaactt
Btn1a1	CTGTACCGAATATA
Btn1a1	AGAGTTAAATTCAC
Btn1a1	AATTCACAGGCTGA
Btn1a1	ACAGATTAGTGGTC
Btn1a1	CAAGTGTATTTATT
Btn1a1	tcattgtaagttta
Btn2a2	ggggcacaagggaa
Btn2a2	aaggagcgcatgaa
Btn2a2	CATAGGAATACTAT
Btn2a2	AAGTgggaagaaga
Btn2a2	GCCAGATgcaatcc
Btn2a2	GAAGAAGGGAGTAA
Btn2a2	AGGACCTCTCAAGT
Btn2a2	GTGTGTGTGAAGAA
Btnl10	AGGTGGCCTGTAGG
Btnl10	GGGATGAGGGATAA
Btnl10	AAGGCACGGAGATG
Btnl10	GCTGGGCCAACTTG
Btnl10	CTCCCCAACTCCTA
Btnl10	AGCCGTAGGAGTTG
Btnl10	TGCCACCCTCCTAC
Btnl10	AGACGCTGGGATGA
Btnl2	CCTGTCCAGCAGGT
Btnl2	CACTGCCAGATGTC
Btnl2	CTACCTGCTGGACA
Btnl2	GGTGACCTGACATC
Btnl2	GCTTGGCCCTAGAT
Btnl2	CTGACATCTGGCAG
Btnl2	GGTCACCTACCTGC
Btnl2	ACAGGGCATGGAGC
Btnl4	CTCCTCTCAACCCT
Btnl4	TGCCCAGGGTTGAG
Btnl4	GCCCTGAGCAATGC
Btnl4	TGCCCAGTCTGCCC
Btnl4	TATGACTCTTCCTT
Btnl4	CACAAGTCATTTCG
Btnl4	GTGTTTCAGTCCTG
Btnl4	TTCGGAGTAGAGTT
Bysl	GTGAAGGTGTCTGT
Bysl	CCAAGGCGTCCAAC
Bysl	GGGAGCGCCATCTC
Bysl	CTGTGATCTCTCAG
Bysl	CCGTTGGACGCCTT
Bysl	TGACGGAGCATATA
Bysl	TCCTGTCAACCCGT
Bysl	GTCTCTGAGTTCGA
C2	GGGGATGGTACCAG
C2	CGGGGAGTGGCAAG
C2	CAGAATAGCTTCTG
C2	tcgctAGAGGGGAG
C2	gctcgctcgctAGA
C2	AGAGAAACCCGCCA
C2	AGAGGGGAGTGGCG
C2	GACCCCAATGCATG
C4b	AAGTCCCTGGTACT
C4b	GAGGCCATCGACTG
C4b	CCAGATCAATTTTG
C4b	GGCTCATGGGGCAA
C4b	ATGGGGCAAAGGGA
C4b	TGAAGCCCAACTTG
C4b	CCCCAAAATTGATC
C4b	GGTTCCCCAGTCGA
Cage1	GCGCATGCTCCCTG
Cage1	CGCCAGGCCCAAGA
Cage1	GGTGTCAGGATACA
Cage1	CCCTAGTGCCCTCA
Cage1	ACTAGGGTTTGGAG
Cage1	GTATGCCACCAGCA
Cage1	CGGAAGTGCAACGC
Cage1	CTGGCGGTTGCCGA
Cap2	CCAGCCGAGGGCGG
Cap2	GAGCACCCAGCCGA
Cap2	CTGAAGGGGGTTGG
Cap2	ACACAGATGGGCCG
Cap2	GCAGAGGCGATCGC
Cap2	CTGCCGGAAGCTGC
Cap2	CTCCAAATACAGAC
Cap2	GCGGTCCCTGAAGG
Capn11	ACAGGCCTGGATTC
Capn11	CGGGGCTGCCATCT
Capn11	CAAGCACCCAACCG
Capn11	CTGGCAGATCAGAT
Capn11	AGTAAGGACAGGCC
Capn11	AGCAAAAGAGCCAA
Capn11	TGGCTCTTTTGCTC
Capn11	TGAAGCTGTAACCA
Ccdc167	GCCCCTCACAAACA
Ccdc167	GCACATCTTATACC
Ccdc167	TGAGGGATGCAAGA
Ccdc167	GTATAAGATGTGCA
Ccdc167	GAGCAGTTCAAGTT
Ccdc167	GCCATGTTTGTGAG
Ccdc167	GCCCCTTAACAAGA
Ccdc167	AGGGAAGCAGTTTC
Cchcr1	CGGCCAATCAGAAG
Cchcr1	GCGGAGAAAGTTTG
Cchcr1	CCGGGAAAACGTGC
Cchcr1	GGGCCGTCAGGGCG
Cchcr1	GAAGTGGCGGAGAG
Cchcr1	GGGTGCAACTCAGA
Cchcr1	cgcgggcgcgAAGT
Cchcr1	gcgAAGTCGGACCC
Ccnd3	GATAACAGGTGTCG
Ccnd3	CGATGAATAGAGTA
Ccnd3	cgtgggggagactg
Ccnd3	cccagttatcacgt
Ccnd3	CAGAGACCAGACCC
Ccnd3	GGTACACATTGCAG
Ccnd3	cccacgtgataact
Ccnd3	GCTCCGTCAGGCTT
Cd2ap	CCCGCCACACCTGG
Cd2ap	ACTTGGTCTCCCTG
Cd2ap	GTGACGTCACGCGG
Cd2ap	CGCCACCATCCTCC
Cd2ap	TGTCGTACACCCCA
Cd2ap	GCAGGGAACTCTGT
Cd2ap	TCCTCCAGGTGTGG
Cd2ap	CGCCACCCAGGCTC
Cd83	TCCCCAGTCGGAGG
Cd83	ggggACTCCCCAGT
Cd83	gACTCCCCAGTCGG
Cd83	GCCTCCTCCGACTG
Cd83	TCAAACCCATCGAG
Cd83	CTCGATGGGTTTGA
Cd83	ATGCAGATTCAGAT
Cd83	CCAGTCGGAGGAGG
Cdc5l	AGCGAAGTCCTCGT
Cdc5l	TGACGTCACGCGGA
Cdc5l	GAGGGCAGTGCCGG
Cdc5l	GGGAACGCAGTGAA
Cdc5l	ACGCTTGGTCCCCA
Cdc5l	GGGGAATAAATGTG
Cdc5l	TCCTCGTCGGTCGC
Cdc5l	CTCAGGTTAGAGTT
Cdkal1	TAACATAATGAGGT
Cdkal1	CAGGACAAGTTATA
Cdkal1	ACGGTAGACCGGAG
Cdkal1	GGAGGTAATTATTC
Cdkal1	AAGCTAACATAATG
Cdkal1	ATTATTCACAAAAA
Cdkal1	CCGCGACGGTAGAC
Cdkal1	agtcactcattata
Cdkn1a	TAGCTGTCTGGCGC
Cdkn1a	CCCGGGATCGGTGA
Cdkn1a	CCGCCCTCCCCTCT
Cdkn1a	CGGCGCGCGTTAAG
Cdkn1a	CAAGAGAATAGCCC
Cdkn1a	CTTAGATTCCCAGA
Cdkn1a	GATCGGTGAAGGAG
Cdkn1a	GAATAGCCCAGGTG
Cdsn	AGAAGAGGTGACTG
Cdsn	GAGGGAAGTTGGTG
Cdsn	GGTGACTGCGGTGC
Cdsn	AGGGTGCTTCTCAG
Cdsn	CTCTTCTGCTGAGT
Cdsn	GGCCACTCTCGCCC
Cdsn	GGTGCTCTGCCCCC
Cdsn	AAGCTGAGGCAATC
Cdyl	AAGCCGGCAGGAAG
Cdyl	GGGGAGCGGGACTT
Cdyl	GCCCAGGCCCGGAA
Cdyl	CCGCACATTGTGGT
Cdyl	AGTTGGGGTGGGCG
Cdyl	GGAGGAGTCGGGTG
Cdyl	GGGCGGGGCCAGTT
Cdyl	GGCCAAGGGGAGTA
Cenpq	GCGCCCGCAATGTC
Cenpq	CCGGCGTCTGGGTT
Cenpq	CGCAATGTCCGGAT
Cenpq	CGGAAGCGTCAGTG
Cenpq	AGCGGGTGTGACCC
Cenpq	GAACCCAGACGCCG
Cenpq	TCGCCGCAGGAGCT
Cenpq	TGTCCGGATTGGAT
Cfb	CCGGCACAATCCTG
Cfb	CGGAACATTCATGA
Cfb	CAGGCCCACCTGGA
Cfb	GTTCCGGGAAGCAG
Cfb	AGGGTAGGCTGGCC
Cfb	TGAACTGCCAACTG
Cfb	GCAGATTGCATAAA
Cfb	TGCGTGCGCAGGGT
Clic1	CTGAGCTAAACAGG
Clic1	AGGAGGGACCGAGG
Clic1	GACACGGGGATCGT
Clic1	GGGGATCGTGGGAG
Clic1	CACGGCTTCCCCAC
Clic1	GAAGGGAAGTCCGG
Clic1	GATAAGGTGTTAGA
Clic1	GTCTGATCGGACTT
Clic5	GGGCCCAGTCACAT
Clic5	GCTCGTACACTGAG
Clic5	GGTCAGTCCGGGCG
Clic5	GGGCGGGGTCAGTC
Clic5	ACTCAGCATTCGTT
Clic5	GTCTCCTATGTGAC
Clic5	TCTGAAGGTCATGA
Clic5	CCCAAAATAGACCA
Clps	cataagcactgggt
Clps	GTACTCCAGTTCAT
Clps	GGAGGGTCCTGATA
Clps	GTCATGTGTAGATA
Clps	cagtagcacaaata
Clps	TAGGGCTTCTTTAA
Clps	ACATGACCCGCCTT
Clps	AGTTCATGGGACTA
Clpsl2	ATGTGGGACAAGGA
Clpsl2	TCCAGCCCATCCAG
Clpsl2	GACGGCTGATTCCC
Clpsl2	GCCTCTGGATGGGC
Clpsl2	CTGGATGGGCTGGA
Clpsl2	AGCGAGTTTGAAGG
Clpsl2	GTCGCTGTGGGAGT
Clpsl2	GAGCCAGCCAGCGT
Cmtr1	CCGCGAAAGAATGG
Cmtr1	GCGAGAGTAGACAA
Cmtr1	GCGCCTGCGCGGAA
Cmtr1	TGGGCAGTTCCCCA
Cmtr1	GCGCTGTGCGACCT
Cmtr1	CTGGGGAACTGCCC
Cmtr1	CTCGCCCTAAAGAA
Cmtr1	GTGACGTTATCAAg
Cnpy3	GCGACGCAACCAAT
Cnpy3	GCGGATGGTGGCTT
Cnpy3	CCGGTAGCCTCTAG
Cnpy3	TAGTCCGTTATCCA
Cnpy3	CCGACCAAGGCCCG
Cnpy3	CCGCGGGCCTTGGT
Cnpy3	GCGCGCGCTGCCGG
Cnpy3	GGCGGCGCTTCCTC
Col11a2	CCCCTACTCCTGGA
Col11a2	TGCCGTGGTGTGAA
Col11a2	GGTGTACCATTCCA
Col11a2	CTATGAAGAGTCCG
Col11a2	CGCTAGCCCTGGAA
Col11a2	CCAGGTGGAGATCG
Col11a2	GGACCTAGGGGCGG
Col11a2	AGCTGATTACGAGT
Cpne5	CCTGGGACCGTCTC
Cpne5	GGATGACGGGGACA
Cpne5	GCGGCTCCGGATGA
Cpne5	AGGCGCAGCGGGGA
Cpne5	CGGCTGGACAAGTG
Cpne5	CAGAGACGGTCCCA
Cpne5	gcgtgGCAGGCGTG
Cpne5	GGGGACTCGGGGAT
Crip3	CAAAGCTGAATAGT
Crip3	GCGGGGCATATCAG
Crip3	CTGAATAGTGGGCA
Crip3	caAACTTAGAACTG
Crip3	GCAAGGGAATGTGA
Crip3	TGGGATACAGACTT
Crip3	AGGGCCGGAAGCAA
Crip3	TTCAATGGCCTCTC
Crisp1	TCCTGTGTCATACC
Crisp1	taactgcaggggat
Crisp1	TAAAggggctacaa
Crisp1	ctacaaaggtgact
Crisp1	CTGCTTGTGCAAGC
Crisp1	TTGCTTTTGAGTAA
Crisp1	cttctagctatgta
Crisp1	ACACTCATTCTTAA
Crisp2	CAGCCGCCACGTGG
Crisp2	CCGCCCCCACGTGG
Crisp2	AGTCACCGCTGTGT
Crisp2	TGTGTAGGATGCCA
Crisp2	AAGAAGTTCTCCCG
Crisp2	GGGGCGGTGTCACG
Crisp2	CTATCCACGTCCCT
Crisp2	TCGCCATTTGTGAG
Crisp3	ataactttactcaa
Crisp3	ctacaaagataact
Crisp3	TTTGAAGCATTTCC
Crisp3	ACACTCATTCCTAA
Crisp3	TCCTGTGTCATACT
Crisp3	CTAATTGTCCCTTT
Crisp3	TTTTTCTTTTAAGg
Crisp3	TTTTTTTTCTTTTA
Csnk2b	GCATGACTCTCTAA
Csnk2b	GGCGGCTTCCTCTA
Csnk2b	TGGCACAGGGAAGA
Csnk2b	GCGCACTCTGTCGC
Csnk2b	AAACTGACGAAATG
Csnk2b	GCGCGGGTCCTCTT
Csnk2b	GTGCGCTCGGGCTC
Csnk2b	GCCCCGCCCCCAGG
Cul7	GTGGAGCCTAGTCC
Cul7	CTGGAGCACCAGCC
Cul7	TAGGCGCAGAGGAG
Cul7	GGGCGGTGCAGGAC
Cul7	CTGGCTGGTGCTCC
Cul7	GGTGCAGGACTGGA
Cul7	GAAGGAGGACTAAG
Cul7	GGCGCGGTACAGAA
Cul9	AAGCGGCGCGTGAG
Cul9	GGGCACAAAGTCTG
Cul9	GGAGATGATTGCTG
Cul9	CAGGGCAACAGCTG
Cul9	ATGCGTATTAGCCG
Cul9	GCTCAGAGCTGTTC
Cul9	TACGGGTCCTACGG
Cul9	GGCCCTCCAGGCTG
Cul9	CGGACTACCTGGGA
Cul9	ggaggAGATGGTAC
Cul9	CGAGCGTGGCAAAG
Cul9	GTGAAGGCTGCCCG
Cul9	GAAGATGGACCCGG
Cul9	GTCTGAGGCCCTCC
Cul9	GCGCACGCACGACC
Cul9	AGCAGCCGTGAGGA
Cuta	CCGCCCTCTTAAGT
Cuta	TGCCGATTGGTCGG
Cuta	ACCGGGCCACTTGA
Cuta	GGCAGCTTTATCTG
Cuta	ACGCCCACTTAAGA
Cuta	GCCGTCACGTGATG
Cuta	CCAGCAACCGGTTG
Cuta	GTGGACCGCGAGGC
Cyp21a1	CCAATACGCCTTTT
Cyp21a1	ACTGTGGATGCAGC
Cyp21a1	TGATGTCTGGGTAG
Cyp21a1	GTCTGGGTAGGGGT
Cyp21a1	TTGGTTTGATGTCT
Cyp21a1	tgggcaacttagtg
Cyp21a1	GTGGGGCATGGCAG
Cyp21a1	cactaagttgccca
Cyp39a1	GGGAACACATCCTG
Cyp39a1	ACATCCTGAGGCGG
Cyp39a1	AACACATCCTGAGG
Cyp39a1	GGTGGCAGGTTCCC
Cyp39a1	GGTCCGGCGGCCTC
Cyp39a1	ACCTGACCTCTCTC
Cyp39a1	AAGCCGTGGGAAGG
Cyp39a1	TAGCTGTTTGCAGC
D130043K22Rik	AAAGGGGTGGGCGA
D130043K22Rik	GCAGGCCATCCCTA
D130043K22Rik	TTGAGGGGATAGAC
D130043K22Rik	CAGGGAAGCAACGG
D130043K22Rik	TTCTGAACTGTTGA
D130043K22Rik	CCATGGCAGGAAAG
D130043K22Rik	CACGCCCCTAGGGA
D130043K22Rik	AAATGCTCCACCCG
D17H6S53E	CTCCGCAACCCGTG
D17H6S53E	GCAGGCGTAGAGAG
D17H6S53E	CGATTCACTAGCGC
D17H6S53E	GGAAGCAGCTGTAC
D17H6S53E	CGCAACCCGTGAGG
D17H6S53E	CAGGGTCTGGTCTT
D17H6S53E	CTGAGCACGAACCC
D17H6S53E	GCGCTAGTGAATCG
Daam2	CTGCTGTGTACCGG
Daam2	GATGGCAGCAACTT
Daam2	GCAGCCCCCAAGAA
Daam2	GCTAGGGATATTTA
Daam2	cccgcTCTGACGTC
Daam2	AGGTGCTGATCCGA
Daam2	CACCGGTACACAGC
Daam2	TGCTAGTTGGCCAG
Daxx	GCGGAGGCTCGACG
Daxx	AGGCCGCTTAGAGC
Daxx	CGAGGCCACCGCTC
Daxx	CCGCGTCCCCGGAG
Daxx	CCTCCACCCTAGGA
Daxx	GTGGGGCAGGTCTG
Daxx	AGGCGGAAGCGCTA
Daxx	GCGGTGGAACTCCA
Dcdc2a	AGGAGGGACAGCGG
Dcdc2a	GTTTAAAGCCCGAG
Dcdc2a	CAATCAGCGCTCGC
Dcdc2a	AACCCACGCCGCTC
Dcdc2a	TGGATGCTTCGGGG
Dcdc2a	ACCTGGATGCTTCG
Dcdc2a	AGCCCGAGCGGCGT
Dcdc2a	CCAGACTGCACACC
Ddah2	AGCAGGATCAGGGT
Ddah2	CGCCCATTCCTCCA
Ddah2	TAGCAGGGCGGAAT
Ddah2	CCTGAGTTCAGGGA
Ddah2	CCAAATGAAGAGAA
Ddah2	AGTTCAGGGAAGGG
Ddah2	TAGCCCTGGCTGTG
Ddah2	GCGCGATGGTCTGG
Ddr1	GCGCGGGGTCCCTA
Ddr1	CTCCCTCTCTGCGG
Ddr1	TAGGAGAggagcga
Ddr1	GAGGCTGAGAACTA
Ddr1	cggggcgggagtac
Ddr1	CCCGCAGAGAGGGA
Ddr1	GAGCCCAGAAAAAG
Ddr1	TGGAACGGGACCAA
Ddr1	CAGCATCGGGGTGG
Ddr1	CAGCCCCCGCAGAG
Ddr1	GCGGGTACCGCACT
Ddr1	AAAAGCCACTGAGG
Ddr1	GGATCACCTAGTGG
Ddr1	GAGGGGAGCAGAGC
Ddr1	CCGCGCGGTGGCTC
Ddr1	GCCCTGGCCAGCTG
Ddx39b	GGAGAGCTCTGCGG
Ddx39b	CTGGCGACCGGAGG
Ddx39b	CTACTGGCGACCGG
Ddx39b	CGAAAGCCTGCTTC
Ddx39b	AAGGAGCCGGAAGC
Ddx39b	GGAACCGGAAGTGA
Ddx39b	CCTGGCGGCCGGGA
Ddx39b	GACGACGCCTCCTC
Def6	AAGAGGGAACAGGC
Def6	CTCCAGCTCTGGGA
Def6	AGCTGGCTAGGCCC
Def6	CTCCAAGTCTGGAA
Def6	CCCTGGAAGCAAGA
Def6	GACTATCTGTGCTG
Def6	GTGGCGAGAGCAGC
Def6	CCCCGGCCCAGGGG
Defb18	ATGAATTCATGTCT
Defb18	AAAGAAAGAGTCGA
Defb18	GAAAGAGTCGAGGG
Defb18	TAAACTAATTACCA
Defb18	TAATTATGCCTTTC
Defb18	CCTTCCACATATGA
Defb18	TAATTAATCAAAAT
Defb18	GTTTAAAGTTCCCT
Defb41	GGAATCACCCACAC
Defb41	TTAGATTAATGTTA
Defb41	GCTTCAGTAGTTAA
Defb41	GGTAAAATAACTAG
Defb41	CAGTGTTGTCTCTC
Defb41	CAGGCAAATAATTT
Defb41	TAGAAACAAATCAC
Defb41	CACTGATGATTATA
Dek	gcggcgTCTCTCGC
Dek	GGGCGGGGTCTCGG
Dek	GCGGGCTGCCCGGG
Dek	ACCCAGCCACCCGC
Dek	CGGCGTCCGGCGGG
Dek	CTCGCGGGCTGCCC
Dek	CCCGGGCGGGGTCT
Dek	GGTTGGACGCTAGG
Dhx16	GCGCACAGATCATT
Dhx16	CCAGGGATCGACGG
Dhx16	AATGATCTGTGCGC
Dhx16	CGGCCAGGGATCGA
Dhx16	TAGCGTCGGGAAAG
Dhx16	ACGCTAAGTGCAAG
Dhx16	atatacgtggttgt
Dhx16	AATTGGAGTCTCTA
Dlk2	GGCTACCCAAAGGT
Dlk2	CTGTGAACGGATGT
Dlk2	GGGCTGTGAAAACT
Dlk2	AGCCGGGGAGGCGT
Dlk2	TGGCAGGAACTTGT
Dlk2	AGCCCACGCCTCCC
Dlk2	GAGGAAAGAACAGC
Dlk2	GGGGCGTGCAGAGT
Dnah8	CTGGGGATAGGCTG
Dnah8	AGATGGGAATTGTG
Dnah8	gggtgcctcgCTAT
Dnah8	GCGCAGCATCTTGC
Dnah8	cccgaggcacccgC
Dnah8	GGGCACAGCAGAGA
Dnah8	TAGcgaggcacccg
Dnah8	GGAATTGTGAGGGT
Dnph1	AGGGGCAGGTCACG
Dnph1	GAGCGGGTTGGCTC
Dnph1	TCAGAACTAATGAG
Dnph1	TAGGGGATAGAAGA
Dnph1	TAGGCAACTGTGAT
Dnph1	GGCAGGTCACGGGG
Dnph1	AGCGAGCTTGAAGA
Dnph1	GATAGAAGATGGAT
Dsp	CCGCAGGTTGGGGA
Dsp	GCAGCCCTCCGACG
Dsp	GCGTCGGTGACACG
Dsp	GGTGACACGCGGGG
Dsp	GGATCCCCGTCGGA
Dsp	GCGGGACTTGCTTC
Dsp	AGGCCACACCTGGT
Dsp	CTGAGCAGAGGCGA
Dst	CGATGCCCTAAGAT
Dst	GGAAGGGAAGTAGT
Dst	CGTGTCTACTGAGG
Dst	TCCCGTGTCTACTG
Dst	GCGCGGTTTCTATT
Dst	CCCACAACAGGTGC
Dst	CCTAAGATGGGCTG
Dst	CGGGCGGGCGTCTG
Dtnbp1	GCGGCGCTCAGGGG
Dtnbp1	CCGCTCTGCAGACA
Dtnbp1	GCGGCGCCGAGGGG
Dtnbp1	CCCTGTCTGCAGAG
Dtnbp1	CTCTGCAGACAGGG
Dtnbp1	AGGGGAGGCTCGCG
Dtnbp1	TGCGGGAATCTCCT
Dtnbp1	ACAGGGCGGGAAGC
Dusp22	AGGCGCAGCGGTAG
Dusp22	GCGGCATTACTGTC
Dusp22	GTGCGCAAACTGCA
Dusp22	GAGCCCCTCTAACA
Dusp22	GCAGGGTTGTAGGC
Dusp22	AACTGCAGGGTTGT
Dusp22	GGAGGCAGGCGCAG
Dusp22	TAACAGGGGAGTCA
Dxo	GGGCGACGGAAGTG
Dxo	GAGCCAATCAGCAG
Dxo	GTGAGCGCTCTGGT
Dxo	GCACCGCTGCTGAT
Dxo	GCGTGGTCAGGTCC
Dxo	GGGGCCCGTGAGAG
Dxo	CGGGTGGAGAGCGA
Dxo	CCCAGTGAGCGCTC
E2f3	CGAAGTAAGGCGAC
E2f3	GTGCGAAACGTCAC
E2f3	CTGTCGCCTTACTT
E2f3	CTCCGTCGCCGggg
E2f3	GGAACAGTCCTCGG
E2f3	GCGGGACGGGAACC
E2f3	AGAGCAGGCTTCTT
E2f3	GGTCCCGGAGAGAA
E2f3	GGCGACCTCGCTCC
E2f3	CGCGCCTGTGACTG
E2f3	GAGATATGCAAATA
E2f3	ACAGATCCTGGCGG
E2f3	CCTCGCTCCAGGAT
E2f3	GGGGCCTTGCTCTC
E2f3	CTCGGCGGGTTGAG
E2f3	ccccCGGCGACGGA
Eci2	GGGGACAAAAAGAC
Eci2	TGTGAAAGGACCCG
Eci2	CGCACCCCTGCCCA
Eci2	GGGGCCAGGGTTCA
Eci2	CCGGGTCCTTTCAC
Eci2	ATTCTCAACTCTGA
Eci2	GTGAGCCCTGGGCA
Eci2	GGCGGAGATAATCT
Edn1	GGATTGTCAGACGG
Edn1	ACAATCCAGGGGCA
Edn1	CCGTCTGACAATCC
Edn1	CCAGAGATAAGACC
Edn1	CCGGGTCTTATCTC
Edn1	TCTAGAGGAAATCA
Edn1	GATTAGTCACCCAC
Edn1	CTGCACGTTGCCTG
Eef1e1	GCGGAGTCAGCTCA
Eef1e1	CATTCGGAGTCCGG
Eef1e1	CAGCTCAAGGCAGG
Eef1e1	CGCCTGCGCGAAAG
Eef1e1	GGATTGCTCACAGT
Eef1e1	CGGTTCGTAATTAA
Eef1e1	CTGCGCGAAAGGGG
Eef1e1	CCACATTCGGAGTC
Efhc1	gggaggatgttagg
Efhc1	GTGGCTAATGGGTG
Efhc1	GCGCAGTGAGGTCT
Efhc1	AGTCgagagagggg
Efhc1	GTAGTGCTGTGCGC
Efhc1	TGCAACCTAGGGGT
Efhc1	CTCTCCAGACTCCC
Efhc1	GAGGATGCAACCTA
Egfl8	GTGGGATAATGTGA
Egfl8	GGGAACTTCTGATT
Egfl8	GGCTGAAGAGAAGA
Egfl8	CTCCGAAATTGTGT
Egfl8	GCTGGAGCAACACT
Egfl8	CTTAGGCTGAAAGG
Egfl8	GCCCAAGGCACCAA
Egfl8	CCTCAGACCCAGGC
Ehmt2	GGGTGAGGCTCGAC
Ehmt2	GGAGGTCCAGAACT
Ehmt2	TCCGCCGGGAGCAA
Ehmt2	AACTGGGGCCTGTA
Ehmt2	GCGACAGAGACTCA
Ehmt2	GCTCGACTGGGCTG
Ehmt2	CGCGGCAGCTGCAA
Ehmt2	CAGAATGGCCCTGG
Elovl2	CTCGGAGGGGACCA
Elovl2	gcgcaggcctctgg
Elovl2	GCGATGCGCTGTCC
Elovl2	gcgCAGAAGGAAGG
Elovl2	gcgccgcTGGCCCT
Elovl2	GTGGTCCCCTCCGA
Elovl2	gcTGGCCCTCGGAG
Elovl2	gcggcgCAGAAGGA
Elovl5	CAATCCGAGCCCGG
Elovl5	CAGGAGACCAACCC
Elovl5	GATGCGGTGAGCAG
Elovl5	TTCAACCCCGGCGT
Elovl5	CAGGATTGGTTCCA
Elovl5	CACGCAGGCTTATT
Elovl5	GGTCCCCTTCACAA
Elovl5	TCTGCGTCCCACGC
Enpp4	GCAGAGAGCGCCTG
Enpp4	ACGCGTCTCACACT
Enpp4	GTGCGCAGCTGCTG
Enpp4	GCGGAGCGCTTCCT
Enpp4	GGCCACTATCTGGT
Enpp4	ACGCGTACCCGGAT
Enpp4	gcccccgcAGAGAC
Enpp4	CGTCTCACACTCGG
Enpp5	GTGGGTTTGAAGGA
Enpp5	CTGCGTGGGTTTGA
Enpp5	GGCGGGCGCTGCGT
Enpp5	GCACAGCTACTCCT
Enpp5	TGCTGGAACGCCAT
Enpp5	GGATGGGTGGCTGG
Enpp5	TGCAGCGACGAGTC
Enpp5	TAGCGGAAGCAGGG
Exoc2	TTAGAGGATATCGA
Exoc2	GAAGTGGACAgaga
Exoc2	AGAAGGGAAGTTAG
Exoc2	CGACGGCATGGAAG
Exoc2	GCCTCTTCCCAGAG
Exoc2	GGAGGACCAGACTA
Exoc2	CTTCCCAGAGGGGA
Exoc2	gaagaggaattgat
F13a1	CTTAGGAACAAATG
F13a1	TCAAAAATGAACAG
F13a1	GAGGAGAAATCCTC
F13a1	AGGCTTGGTGACAG
F13a1	CAAATGGGGTATGG
F13a1	GGAAGCAGCTGTGA
F13a1	GGAAAGGCTGACTG
F13a1	AGCTGTGAGGGAGT
F13a1	AGCCGTCAAGAAAG
F13a1	CTGCAAGGTGTAGT
F13a1	CTGGCAAATGGCAC
F13a1	CTTGAAGCTACAGG
F13a1	TTGCTGGGTCAGAA
F13a1	aagcctaagaGTGT
F13a1	AATCCTCTGGGATG
F13a1	GTGTCAATGGTGAC
Fam217a	TCACCCTCTGCTGC
Fam217a	CTAACAGCAATATA
Fam217a	ATGAGAGCTAAGTA
Fam217a	GAGCTAAGTAAGGC
Fam217a	TAAGGCAGGAAGAC
Fam217a	GCCATGTGGGCCAG
Fam217a	AATGAGGAGGCTTC
Fam217a	tAAAGCACATGTGG
Fam50b	CAGGAAAACTTCAT
Fam50b	GGTTGGTGGTCATA
Fam50b	CAGACGCTGGCAGC
Fam50b	AGACCCTGGGAACA
Fam50b	GGCTCTAACCAATC
Fam50b	GTGGAGGCAGACCC
Fam50b	AGATTGGGCCAATC
Fam50b	GTGCACTTTTTTAG
Fam50b	CAGTCAGTCCAAGT
Fam50b	ATGCAGTCAACTCG
Fam50b	CTTGGACTGACTGA
Fam50b	GTGCACTTTGCCAA
Fam50b	AGGAGATCAGACGC
Fam50b	GCCAAATAGATCCT
Fam50b	AGCAACGACAGTCC
Fam50b	tggtgaaggagcac
Fam83b	CGCTGGAGCAAGTC
Fam83b	CAGCCCGGCGGGCG
Fam83b	GAGTGCTGTGTGCA
Fam83b	GCGCGCTGCGAGCA
Fam83b	GCCCAAGAGCCAGG
Fam83b	TGGCCGCACCTCCC
Fam83b	CGAGCGTGTCACCA
Fam83b	CGGCGAGTTGCAAC
Fance	CGGGGACGGAGCGA
Fance	GGAGCGAGGGCATC
Fance	GTGATCATCGGGAG
Fance	AGAAGCCCGCGAAG
Fance	GAGCGTCCAGGAGA
Fance	AGGGACGTGATCAT
Fance	TTCTCGTACTATGC
Fance	GGAGAGGGGCGGAG
Fars2	TAGGCAGGTGTAGG
Fars2	GTGCACGAAAACGA
Fars2	GTGTCAGGAGACAC
Fars2	AGGCAACGGGGCCT
Fars2	GCTCGCTCCTCGGG
Fars2	AGGCCCCGTTGCCT
Fars2	TCCGCGTTCCTCAC
Fars2	GCGGCTCGTAACCC
Fbxo9	GCACCCAGTGTCCA
Fbxo9	CGAGCTAGGGTGAT
Fbxo9	TAGCTCGCGACGGG
Fbxo9	AGGCGGGCTGAGTG
Fbxo9	GGTAGCCAAGCAGG
Fbxo9	AGCATCAAACAGGC
Fbxo9	GAGAACACCCAGGC
Fbxo9	GAGTCGATCCTAAT
Fgd2	GGGCAGTACTTCAC
Fgd2	TAGAAGTATCTGAG
Fgd2	GAAGGCACGGGCTG
Fgd2	AAAGGGGACGGCTC
Fgd2	GGCTGTGGCAACAG
Fgd2	AAGCTGCTCATCCC
Fgd2	GCAACAGTGGTCAC
Fgd2	GCATGGGGGGAAAG
Fkbp5	GGGCAGCGGTGAAG
Fkbp5	GCACGGAGACTCCA
Fkbp5	GATGCAAACGAACG
Fkbp5	GCGCCTAGTGGGAG
Fkbp5	CCACCAATCGGGAC
Fkbp5	GGATCAAGCGGGGT
Fkbp5	CGCGCGCCTTTTGG
Fkbp5	CAAGAGGACCCCAA
Fkbp5	AGGGCCAGACACGT
Fkbp5	GCTCCGGGAATCCC
Fkbp5	GCGCCTTTTGGGGG
Fkbp5	AAGCCCAGCTTTTT
Fkbp5	GCACGGCCACCAAT
Fkbp5	AGGGAGCGCCTAGT
Fkbp5	CCGCCCGTCCCGAT
Fkbp5	GGGGCCCACCCTAC
Fkbpl	GGAAACTTgggctg
Fkbpl	GCTTAGGTCTAGTC
Fkbpl	GCCAAATCGAACCG
Fkbpl	GGTTGACAAAGATC
Fkbpl	ACCTCGGTTCGATT
Fkbpl	TAATTCTATTGCTT
Fkbpl	TAGTCCGGTTGCTA
Fkbpl	tgaagctcgaactt
Flot1	AGGGGCGGACCGAG
Flot1	CCCGCTCGAAGCAT
Flot1	GGCAGGCTCCGCTC
Flot1	GAACTGTAGTGCTG
Flot1	GCTGCGGACCCGAG
Flot1	GCGTGGCCTCGGTT
Flot1	ACGCCCTTCCACTC
Flot1	CTCGGCAGCCCAGG
Foxc1	CCGCCCCACTACGG
Foxc1	AGGCGGCAGCCAAT
Foxc1	GGCCAAATAACCAg
Foxc1	ATAACCAggggcgg
Foxc1	cgccccTGGTTATT
Foxc1	GACCACAcgcgcgc
Foxc1	GCCGCCTCCGTAGT
Foxc1	AAAAGGTGAcgcgg
Foxf2	GCCCGCCACGGGGA
Foxf2	GCCGCCAGGTCCAG
Foxf2	GCGCGGAGCAAGGA
Foxf2	GGGGAGGGCGCACA
Foxf2	TGCGGGTGTATCTG
Foxf2	CTCCCCGTGGCGGG
Foxf2	GCGCCGCCCGCCAC
Foxf2	GTGCGCCCTCCCCG
Foxp4	CTCCGGACTCCGAG
Foxp4	GGGGCGACCGGCTC
Foxp4	GCCCCGGCTGCGAG
Foxp4	gagcgagcggcgga
Foxp4	TCGCCCCTACGGAC
Foxp4	GATCGCGTGTTGGG
Foxp4	agcgacagggagga
Foxp4	GGGCACACCgggcg
Foxq1	CGAGCGCACGGCTA
Foxq1	AGGTTGTTTGTTTT
Foxq1	CCAAGGCGTTCATC
Foxq1	CGGGGCAGCCGCAC
Foxq1	AGAAACCCACTCGG
Foxq1	CGCGGCTCCCCCCA
Foxq1	CACAGAGTCTCCGC
Foxq1	CGAAAGGGCGGGGC
Frs3	CGGGGACAGAGGTA
Frs3	CAAAGGGACCTTCT
Frs3	GACTAGGACTCCTG
Frs3	GCGCAGACGCCAGA
Frs3	AGGGGAAGTGGCGA
Frs3	CGGGGCCCGCGACT
Frs3	CGAGCCGGGGCAAC
Frs3	GCCTGTCTGGAGAA
Gabbr1	GCCGGGATCCGGGG
Gabbr1	ggagactagaggag
Gabbr1	GCGTAGAGGTAGGA
Gabbr1	GGGGAGAACTGGTA
Gabbr1	GGCGGTCTAGGGAG
Gabbr1	aggggaagcgaggg
Gabbr1	CCGTGGGCGGTCTA
Gabbr1	aagaggggaagcga
Gabbr1	AGAGGTAGGATGGA
Gabbr1	GAGGAACTAAGGGT
Gabbr1	GGGGCCGGGATCCG
Gabbr1	agaggataaggatt
Gabbr1	ggggagatcggaga
Gabbr1	GGGACCAGTGAACA
Gabbr1	GCAGACTAGACTGA
Gabbr1	agagggagagcgca
Gclc	gagggtgtccgcgg
Gclc	aagcggcaggtcgt
Gclc	GGACTGAAAAGTCT
Gclc	gcaggtcgtgggtg
Gclc	GCAGGCGCGGAACT
Gclc	cccgcggacaccct
Gclc	CGCGGCGCACGGAG
Gclc	gggaacgaagcggc
Gcm1	GCCCAGCTCTTCTC
Gcm1	TTAGCATTAAGGAG
Gcm1	CCCTGAGAAGAGCT
Gcm1	GCAAACACCGAGGG
Gcm1	CCTGACCTGGGTTA
Gcm1	GCGAGAAGGCAGAC
Gcm1	CCTAACCCAGGTCA
Gcm1	TAAAAGGATATTGA
Gcm2	gaggtaagtgaaag
Gcm2	GTGCTTCTGTTCAG
Gcm2	GGGTGCCCTGTCAT
Gcm2	TTTTCCAagtgaga
Gcm2	CTCAGCCAATGACA
Gcm2	TCCAagtgagaagg
Gcm2	TTGTACAGAGACAC
Gcm2	ACAAACCTGCTTAA
Gcnt2	GGAAGTCCTTAAAA
Gcnt2	GCTGGTACAAAGGG
Gcnt2	TGAAAGCTTCAATT
Gcnt2	GGGTGGAAAAAGGC
Gcnt2	CCAAATTCTTTCCA
Gcnt2	GCCCAGAGAAGTAA
Gcnt2	CCAGCTGGTACAAA
Gcnt2	AACCCCAAATTCCA
Gfod1	GCAGGCGAGACAGG
Gfod1	GGAGGAGTCAAAGC
Gfod1	GGGAAGCCACCCGG
Gfod1	CGGCGCTACCGCAA
Gfod1	GCGCCGTGCTCCAT
Gfod1	AAAGCGGGTTCCAG
Gfod1	GCAGCAGGCGAGAC
Gfod1	GGCGGAGACAAGGG
Gfral	GCTTAGTGTTCTAG
Gfral	ATGGTCAAATTTCT
Gfral	AAACCAAATAACAG
Gfral	AATAGGGGACCTCA
Gfral	GCAATCATTTCCCT
Gfral	TCCAAGACAGAGCA
Gfral	AAGAAGATTTAAAA
Gfral	ACTTTTCATGAATA
Glo1	TGAACCAGACTCAC
Glo1	GCCGCCCCGAGGAA
Glo1	GGGGCGGGCGGACG
Glo1	GATTCCAGTGAGTC
Glo1	ATGTGCACCGTGGT
Glo1	AGCCATGTGCACCG
Glo1	CTCCCAGCCAACCA
Glo1	CAAAGGCGTCCCCC
Glp1r	GAGTGGAGCCCGCG
Glp1r	GCCTCCAGCGTCCC
Glp1r	CGCGGGCTCCACTC
Glp1r	GGCGCAGGCACCAC
Glp1r	GCCTCCTGAAACCC
Glp1r	CCGCAGGAGGGATC
Glp1r	AAGCTCCGCTCCTG
Glp1r	GGGACGCTGGAGGC
Glyatl3	AAGCAGAAGATGGG
Glyatl3	TGATAAGAATGCGG
Glyatl3	TAAAAGCAGAAGAT
Glyatl3	GAAAACATCACCAC
Glyatl3	GAGACCACTGTCTC
Glyatl3	GTCCATATAGTTGC
Glyatl3	TGCCTCCTTTGAAG
Glyatl3	ACAACTCTTTAGAG
Gm15386	GGAATCACCCACAC
Gm15386	TTAGATTAATGTTA
Gm15386	GCTTCAGTAGTTAA
Gm15386	GGTAAAATAACTAG
Gm15386	CAGTGTTGTCTCTC
Gm15386	CAGGCAAATAATTT
Gm15386	TAGAAACAAATCAC
Gm15386	CACTGATGATTATA
Gm9573	GGCCTAGGGGTCAA
Gm9573	CATCCCTGCCTCAG
Gm9573	CGCTGGGTTGAAAC
Gm9573	GAAGGCAACGGCCT
Gm9573	ATCAAGATTGTCAG
Gm9573	ACTTAGGCAAAGAA
Gm9573	GGCGCCTAGATAGT
Gm9573	ACAGTACTGAGTCT
Gmds	GGCGGAGCTGTCGG
Gmds	GCCACGGTCTGACA
Gmds	CGGGCGTGGAGCGA
Gmds	CGGGCCAGCTTAGT
Gmds	CTGTCAGACCGTGG
Gmds	GCCGGGCTGAGGCC
Gmds	ACGCGTCGCTGCTT
Gmds	CTCCGCCCCTGCCG
Gmnn	CTCCAAGTGTCTGC
Gmnn	ACGGCAAGGTCAGA
Gmnn	GGAAGAGGTCACCG
Gmnn	GGCAAGAGGAACCT
Gmnn	GAGCCGGAAGCGGA
Gmnn	GAGACTCTCACTAG
Gmnn	GACTGCACGCACCT
Gmnn	CGGCGAGAGGCGAT
Gmpr	GCATGGCAGAATCC
Gmpr	GTCAGAGCTCTCTA
Gmpr	AGGAGGGGGCGCTT
Gmpr	GAGAACTGGGCCCG
Gmpr	AACTGGGCCCGGGG
Gmpr	GCCAGGCGCCCCAA
Gmpr	ATACCCCGGGGAAT
Gmpr	GTGACCAAAGGAGA
Gnl1	CCCCGCCAGGTGAG
Gnl1	GCCCGGCCCCCGCC
Gnl1	TGGCAGTCGCGGGA
Gnl1	CAGGCCAGTCCACG
Gnl1	AGGCGGCCGCGCGG
Gnl1	GCGGCAACAGGACT
Gnl1	AGAGGCAGGTTCAC
Gnl1	CGGTAAGGAGATTG
Gnmt	AAGACAGGTCAGAT
Gnmt	TAGGGGCTTTTGTA
Gnmt	CTCTGCCTTGAGGA
Gnmt	GTACGTCAAGTCAC
Gnmt	AGATAGGACTCGCC
Gnmt	CATGGGGACTCATT
Gnmt	AGGACTCGCCAGGG
Gnmt	CTAACAGAGTCTAG
Gnmt	TCCTCCTTGGGTAG
Gnmt	GGACTCATTAGGGA
Gnmt	TGGCTTAGTAAGAC
Gnmt	agacccttgatcac
Gnmt	TGTCTTACTAAGCC
Gnmt	AGCCCTCCACTTAG
Gnmt	TCTTGTACTTGGAT
Gnmt	AAGCCAGGCAACAC
Gpank1	GCATGACTCTCTAA
Gpank1	GGCGGCTTCCTCTA
Gpank1	GCAGCAGACGAAGT
Gpank1	AAACTGACGAAATG
Gpank1	GCGCGGGTCCTCTT
Gpank1	AGACGAAGTAGGGA
Gpank1	GCGTCCACGGAGGT
Gpank1	GGGCCACTGGAAAC
Gpld1	CTGTCCACCTGGGA
Gpld1	AGAAAGCAATCTGC
Gpld1	TTGAGGGGAAATCT
Gpld1	CAGCAAGGTAGTAT
Gpld1	GGATCTAAAAGCCT
Gpld1	CAAACTGTCCACCT
Gpld1	CCCGTCGACTTCAT
Gpld1	CATAGGTAAGTGTC
Gpsm3	AGCTCCTGACAGGG
Gpsm3	GGTGGAGAGTATGA
Gpsm3	GGGCGGATTCCTGC
Gpsm3	CCAAGCATTGCCGA
Gpsm3	GGTTACTGAGGCTC
Gpsm3	AGCAAGCTCCTGAC
Gpsm3	GCTGACCAGGAACC
Gpsm3	ACATGGTTCTGGTG
Gpx5	GTGTGGTGAGGCCC
Gpx5	CGGAGTGCTCGTGG
Gpx5	GTGGGGGCGTGTGT
Gpx5	CACACTATTGAATT
Gpx5	TCATATGAGTTCCA
Gpx5	TGCTATACTGCGTA
Gpx5	GTCTTAATAGGTGT
Gpx5	aagggaatcgagct
Gpx6	CTTGAGTTGGAAAA
Gpx6	TATCAGGAGAGCAA
Gpx6	GCTCTGACAGGTGA
Gpx6	GCACATGCTCTGAC
Gpx6	AGCAGCACTGTGAT
Gpx6	AGGTGACATGAAGG
Gpx6	CAGTACTCAGGTAA
Gpx6	GAGTTGGAAAAGGG
Grm4	ACGGGGCTGATTGG
Grm4	GGAGGAGTGTAAGA
Grm4	CCCGGGTAGTGAGA
Grm4	CAACCGGGTGCGGA
Grm4	GAGGGGAGGCTTCC
Grm4	GCGACAACCGGGTG
Grm4	AGGCTTCCGGGAGC
Grm4	AGATGGCGCGCTCA
Gsta1	TGAAAGAGACATCT
Gsta1	ATCTTGGCTAAGAA
Gsta1	CAGGGTTGACTCTG
Gsta1	ACAATTCTTACCCA
Gsta1	AAGTTAAACACAAC
Gsta1	TAGATATCATGCTA
Gsta1	TGTCACCTTACTAA
Gsta1	TATCATGCTATGGC
Gsta2	AAAGGTGACAAATC
Gsta2	ACTGGCTATATTAG
Gsta2	GACAAATCAGGAAG
Gsta2	GGGCTGATCCCTAT
Gsta2	AGAGGAACCTTATC
Gsta2	ATAAAGAACTCTAT
Gsta2	GTATAGGGACCAAT
Gsta2	AAATTTTCAGGAAG
Gsta3	CAGAGTTAACTCTT
Gsta3	AGGGAGTACTTCTG
Gsta3	GGGCTAAAGCAAGT
Gsta3	TTCGGCTGTCAATG
Gsta3	CTGTCAATGAGGAT
Gsta3	AGTTGCTAAAGAGT
Gsta3	GAGACAATCCAATA
Gsta3	ttcccagctcccta
Gsta4	TCCGATTCCTGTGC
Gsta4	CCGGGGAGAAGAAC
Gsta4	CTGAGTACACTCTT
Gsta4	CTGTTCTTCTCCCC
Gsta4	AGGAATCAGCGACT
Gsta4	TCTAACCTTTCAAT
Gsta4	acgtacagttctgg
Gsta4	aagccaaaattgag
Gtf2h4	CGGCCGAGAAAAGG
Gtf2h4	GGCCGGCCGAGAAA
Gtf2h4	CACCGCAAGAAGGC
Gtf2h4	CCGGGGCCTCCTAT
Gtf2h4	CTGGAGGAGCTCCG
Gtf2h4	GGCGCGGAATCAAA
Gtf2h4	AAAAGGTCTGACTT
Gtf2h4	AGGTGGCTTTTCAT
Gtpbp2	GTCACAGGTGGCTT
Gtpbp2	CCGCAGGGCATCAA
Gtpbp2	GCGAGAGTCACAGG
Gtpbp2	TAACCGGAGGTGAA
Gtpbp2	TAGCGATGCCTCTT
Gtpbp2	ACAGGTGGCTTCGG
Gtpbp2	GAGCGCAAAGACTA
Gtpbp2	TAGGGGCAGTAGGA
Guca1a	CTCTGGGATGTCCA
Guca1a	GCGCAGCCTCAGTC
Guca1a	CTGCGCCCTTGAGT
Guca1a	TTGGACATCCCAGA
Guca1a	AGGTCCATGACTGA
Guca1a	TAGCACATTATGTC
Guca1a	TTCAGTATATGCAA
Guca1a	TTAACAGGATCTGG
Guca1b	AATCACGGAGAGAA
Guca1b	GTCCAGTGAGAGGC
Guca1b	CAGGAATCTCCTAA
Guca1b	GGGTAAGAGCCTGG
Guca1b	ACAGGTCCAGTGAG
Guca1b	GCGGGTTAGTGCTC
Guca1b	AAACTGAACTTGAT
Guca1b	GAGGCAGGCTATGA
H2-Aa	CCGAGAGAGTGCCT
H2-Aa	GCAGACTTTGTATT
H2-Aa	ACCCACTTCTTCCC
H2-Aa	CCTGGAAGAGGCTA
H2-Aa	AGGAGGCCTGGAAG
H2-Aa	ACAGATGGCAAGAG
H2-Aa	GACTTTGTATTAGG
H2-Aa	GTGTCGAAGTTGGA
H2-Ab1	ACGTTCATCCAGTG
H2-Ab1	CAACCCTGACACTC
H2-Ab1	TGAGGCACCCCAGA
H2-Ab1	AGGCTCTCTATGCG
H2-Ab1	GACTTTGTTTACAA
H2-Ab1	CTCTGGGGTGCCTC
H2-Ab1	CAGAGTGTCAGGGT
H2-Ab1	ATCCCAGAGTGTCA
H2-D1	TGAGACTAAGCCCG
H2-D1	GGTCTCACTATCAT
H2-D1	CTGTCCGCAGTACA
H2-D1	TCTTGGTTGCCAGG
H2-D1	TTGTGGGTCTCTCC
H2-D1	GTGAGTCGGGCTTG
H2-D1	CTGTAGCTCCAGAT
H2-D1	GAAAGGTCACTTCC
H2-DMb1	AAGGCCTTAAGAAC
H2-DMb1	TCTGGGGTCCTAAA
H2-DMb1	CAGTGACTACCACA
H2-DMb1	GGCTGAGTGACTCG
H2-DMb1	TCCCGGAACCTAAA
H2-DMb1	ACTCGGGGCCACAT
H2-DMb1	CCTTGGGCACAATG
H2-DMb1	GTGAGTGGGTACAA
H2-DMb1	CATCATCAGTTACT
H2-DMb1	TAGCCTAGCATCAT
H2-DMb1	GTCAATCCAGAGGC
H2-DMb1	CAGGACCTTCTAGG
H2-DMb1	GTTCTTAAGGCCTT
H2-DMb1	GGTCCTAAAGGGAG
H2-DMb1	GAAAGTCAATCCAG
H2-DMb1	CTCAACCAAATCTG
H2-DMb2	CAGGACCTTCTAGG
H2-DMb2	GAAATCCTCTCCTA
H2-DMb2	TAGCCTAGCATCAT
H2-DMb2	CCACAGGAAGCCGT
H2-DMb2	AGAGGCAAGACTGT
H2-DMb2	AGCTAGACTCCCGG
H2-DMb2	CCTGGCCTGCCCCT
H2-DMb2	GCCCATGAGGGGGA
H2-DMb2	GGAAACCACCTAGA
H2-DMb2	ACCCTCCCCCTCAT
H2-DMb2	TCTGGGGTCCTAAA
H2-DMb2	GCCACGCCCATGAG
H2-DMb2	CATCATCGGTTAAT
H2-DMb2	GGAAGCCGTAGGAG
H2-DMb2	AGTCACTTAGTGAT
H2-DMb2	CAGTCCCACTGCCG
H2-Eb1	CCAATCAGCATCAA
H2-Eb1	gggatatgaggcat
H2-Eb1	GCAAGTTTCAGAAG
H2-Eb1	tctgtgagatagaa
H2-Eb1	GGTAAGGCCAGTGC
H2-Eb1	TGGATACTCAGTct
H2-Eb1	TTTGCCACTGGATT
H2-Eb1	GATAATAAGAGACA
H2-Eb2	TGTCTGCTTAACAA
H2-Eb2	CAGTTGCTGGTCAG
H2-Eb2	GAGGCGCAGAGTGA
H2-Eb2	TGATCAAAGCTTCT
H2-Eb2	AACCCAGCACCAGT
H2-Eb2	GATGGGGAAGTCAT
H2-Eb2	GGGGAAGTCATAGG
H2-Eb2	GAGGAACCCCAACT
H2-K1	CGGTACATGGAAGT
H2-K1	AGTGTCCGGACAGA
H2-K1	GTGTCGGGACGTGG
H2-K1	GGAGACGACAGCAC
H2-K1	GCGCGGGCTGAGAG
H2-K1	GCGTCAACAGTGTC
H2-K1	GCCGACAGGTGCGA
H2-K1	GCCCCTCCCCTCAG
H2-Ke6	ATCCACCACCACTT
H2-Ke6	CTGGCCCTGGTCAC
H2-Ke6	GCCCCCGTGGTGGG
H2-Ke6	GGAGGTCGCGCTGG
H2-Ke6	ACCTCCCACCACGG
H2-Ke6	CAAGTGGTGGTGGA
H2-Ke6	AGGTCCCCAAGTGG
H2-Ke6	CACTTGGGGACCTA
H2-M1	GAATCAGAGCCCTA
H2-M1	AATCCCAATGGTAG
H2-M1	CAGCATTGTGATCA
H2-M1	ATAAGCTCAGTGTG
H2-M1	GCAATTTCAATGTT
H2-M1	CATGATTCACTCTG
H2-M1	GTGAGAATAAAAAT
H2-M1	TCATTATTGTATTT
H2-M10.1	GTAGAACTGGTGCA
H2-M10.1	TTGGACCAATTCCT
H2-M10.1	AATTCCTGGGTGTA
H2-M10.1	TGGCTGATTCTGAT
H2-M10.1	ACAAAGTGTAGAAC
H2-M10.1	TTTACAACCCGATG
H2-M10.1	GATTGGCTTCTAGT
H2-M10.1	tgattgtgtttgtg
H2-M10.2	TAGTCAAGGACTCA
H2-M10.2	GAGTCCTTGACTAG
H2-M10.2	GTGGGTGCAAGATG
H2-M10.2	CCACTTCTGCAATC
H2-M10.2	GGAAGCTGAAAATA
H2-M10.2	AGACCTGATGGAGT
H2-M10.2	CTGGCCTCTAGTCA
H2-M10.2	CAGATTGCAGAAGT
H2-M10.3	CTGGTGCAAGTTGG
H2-M10.3	GAACTGGTGCAAGT
H2-M10.3	AGAAGGCTACACAA
H2-M10.3	GATTCCTGGGTTTG
H2-M10.3	TAAAGCTGTAGAAC
H2-M10.3	CATTTTACATTTCT
H2-M10.3	CCAAAACAATCTTC
H2-M10.3	ACTATCTGAATGTA
H2-M10.4	AGGATGGTATAACT
H2-M10.4	CAACTGGTGCCAAG
H2-M10.4	CAAAGCTGTACAAC
H2-M10.4	TTATAAAACTGATG
H2-M10.4	AGTGAAGAGATATC
H2-M10.4	TGAGTTTGTCCTTC
H2-M10.4	TCCGAAGATCATTT
H2-M10.4	AAATGATCTTCGGA
H2-M10.5	GAACTGTTGCAAGT
H2-M10.5	CTCTGTACACGCTT
H2-M10.5	ACAGCTTTGTACTG
H2-M10.5	AAACAATCTTCGAG
H2-M10.5	ACAATTTTCTGAGA
H2-M10.5	CTCGAAGATTGTTT
H2-M10.5	TATTTCACATTTCT
H2-M10.5	TGAGCTAGGAACCA
H2-M10.6	CCAACTCCTGGGTG
H2-M10.6	AACAGGTGCAAAGT
H2-M10.6	AAGGATTTGAAACT
H2-M10.6	ACTCCTGGGTGTGG
H2-M10.6	TAAATCACTACCTT
H2-M10.6	CAAAGCTGTATAAC
H2-M10.6	GATTTAGACCTGAT
H2-M10.6	GAGAGACCAACTCC
H2-M11	TTGGGGTTTGGTGA
H2-M11	TATAGAGGCCTTTG
H2-M11	CTTGGATTACAGTT
H2-M11	TAAGAATCCATAAA
H2-M11	ATCTGAGCTGCAAA
H2-M11	AGCCCAACTGTGAG
H2-M11	GAGACCTGACAACT
H2-M11	TGGAAATCCTCTCG
H2-M2	AGGTGTCTGGGCAA
H2-M2	CCTAGAGTCTCCTT
H2-M2	GTAGGAATGAGAAT
H2-M2	AATGATATCTCGTC
H2-M2	AGAAGATCTTTATT
H2-M2	CCTAAGGAGACTCT
H2-M2	ATTCCTCACAATCC
H2-M2	CTCGTCAGGTGTCT
H2-M3	caAGTGATAATTAT
H2-M3	GCGTCATCAGTATC
H2-M3	ccaggCAAACTCCA
H2-M3	ATTCCCATTCTAAT
H2-M3	tatcacaagttcca
H2-M3	CAACCAATTAGAAT
H2-M3	ATTAGAATGGGAAT
H2-M3	ggaacttgtgatac
H2-M5	GAAGAGCAGACCTG
H2-M5	GAACTCAAAGGTTA
H2-M5	GGTAAGCTGGAGAA
H2-M5	CTCAAAGGTTACGG
H2-M5	ACACCTGACACTGA
H2-M5	ACACTGCGGTGTGT
H2-M5	AGAAAGGAACTCAA
H2-M5	CTGATGTGACCCTC
H2-M9	TAGCTCTGGGGCGT
H2-M9	GATTCAGGACCCTA
H2-M9	TGAGCTGGCGATTC
H2-M9	ATAAGTGCAGTATG
H2-M9	TTGTGTTCATGGCT
H2-M9	GCAATTTTAACGTC
H2-M9	AAGTACTccaggca
H2-M9	TAAGAAAGTACTcc
H2-Oa	GGAAGTAAAGAGTC
H2-Oa	AAGGGGCTTCAGGA
H2-Oa	TGACAGATGACCCA
H2-Oa	ATCAGGTTCTATCA
H2-Oa	CTCTGGAAATTTTG
H2-Oa	GGGGAAGACCCTTG
H2-Oa	CCCAAAATTTCCAG
H2-Oa	GGAAGACTGTGTAA
H2-Ob	AAATGGACCAGCAT
H2-Ob	AGGTAACCAGTTCT
H2-Ob	TCTTCGCTCTTGAT
H2-Ob	TAAAAGCCAAGAAC
H2-Ob	GAAGGGAGACCTGT
H2-Ob	GTCTACAGAGTATG
H2-Ob	TGGCTGTTGAAATG
H2-Ob	GTCAGTCACTCTCT
H2-Q1	ACCAGCTACTCTGT
H2-Q1	GCCCACAGAGTAGC
H2-Q1	TCTGGCAGGTCCAT
H2-Q1	GCAGGTCCATTGGG
H2-Q1	ACAGAGTAGCTGGT
H2-Q1	GTCCATTGGGTGGC
H2-Q1	TCCACGCAGCTCGA
H2-Q1	cttggctggtgatc
H2-Q10	GAATGACCTGGCCC
H2-Q10	GGACACAGAGATTC
H2-Q10	TGGGCCAGGTCATT
H2-Q10	CGAGCCGAATGACC
H2-Q10	GTGGGTTCCGTGTG
H2-Q10	TGAGGTCAGGGGTT
H2-Q10	AATGGCAGTACAAG
H2-Q10	CAGTACAAGGGGTT
H2-Q2	ttagcaggtcatca
H2-Q2	tgagaggattctaa
H2-Q2	CGCTGCTGAGGAGC
H2-Q2	GTCCATGCAGCCAA
H2-Q2	caggttgtcttagc
H2-Q2	CTGGTTGGTTTCCC
H2-Q2	gaggattctaaagg
H2-Q2	AGCTCCTCAGCAGC
H2-Q4	GGCAGTGAGATCAG
H2-Q4	GTTCTCACCCCCAT
H2-Q4	GCGGCGACGATGAT
H2-Q4	ATCACGTCACCCAA
H2-Q4	GTGGTGTTCTAATG
H2-Q4	GGTCTCTTCTCTCC
H2-Q4	AAGTCATCAGTGTC
H2-Q4	ATCATCGTCGCCGC
H2-Q6	ATGGAGTCCATGTG
H2-Q6	ACTCCATAGAGACC
H2-Q6	GGTGAGGTGATCAC
H2-Q6	TTGACCTCACAGCC
H2-Q6	TGCAAAGCCCCACA
H2-Q6	GGCTGTGAGGTCAA
H2-Q6	GAATGAACTGACCC
H2-Q6	GTGAGAACTGTTAC
H2-Q7	TGAGGTCAAGGGTA
H2-Q7	GGAATCCCCAGCCA
H2-Q7	GTGGAGTCCATGTG
H2-Q7	ATCCAGATGCTGTC
H2-Q7	ATCTCCAGGCAGTG
H2-Q7	TGCAAAGCCCCACA
H2-Q7	ACTCCACAGAGACC
H2-Q7	GAAGCCCATGGCTG
H2-T22	AGGCAAGGACTCTC
H2-T22	ggaagtcatgacgt
H2-T22	GGAAGACGGAGTGA
H2-T22	aaggaaagtcctga
H2-T22	atgacgtgggagaa
H2-T22	TCAGGCCCTCTCAT
H2-T22	TGCACACTGATCTC
H2-T22	CTTTCTGGGCACTT
H2-T23	TGTAGGTCATGAAA
H2-T23	CCTCACAGACCCAG
H2-T23	CTACAGCTTTAACT
H2-T23	AATAGTCCTCATTC
H2-T23	AGTACGAAGTCAAC
H2-T23	AAAGAGAAAGCAGT
H2-T23	CATCCTCACCCCCT
H2-T23	GCAGCTGAAGCAAG
H2-T3	GGAAGTGGCTGTCA
H2-T3	TGACAGCCACTTCC
H2-T3	AGGCCTGAAGGCGG
H2-T3	GGTGCCAGGCACCA
H2-T3	CCATCCTCATGTTA
H2-T3	CCAAGTCCCGGAAG
H2-T3	GAGTGGAGAAGTGG
H2-T3	CAGCCTTTTAGGGG
Hcrtr2	TGGAGCTGAGGTCA
Hcrtr2	CTGCCTAAGAGCCA
Hcrtr2	GCGACTAGGGGCTC
Hcrtr2	TGCAGCAATGATTC
Hcrtr2	GCCGCCGCGACTAG
Hcrtr2	GGAGGCATTGGCTC
Hcrtr2	CGCCCGGCAACTTC
Hcrtr2	GGAAGGTCAACGCA
Hdgfl1	GCAAACAGCAAGAG
Hdgfl1	TGGCATCTGGGTTA
Hdgfl1	AAGAGAGGTACCTA
Hdgfl1	GCTCCATCAGCCAT
Hdgfl1	ACCACAACTGCCAT
Hdgfl1	GGAATACAACAAAA
Hdgfl1	ACTGTGGAAGTAAA
Hdgfl1	AGCGGGACCTCTCG
Hfe	ttacaggacggctt
Hfe	tgattgcaagtcta
Hfe	gccactgctgagtc
Hfe	GAAACAAGTTgcag
Hfe	GGACGAGGGCATTA
Hfe	GGCATTAGGGGTGC
Hfe	GTAGGCATGTTAAC
Hfe	GATAATTCTCCCGT
Hist1h2ae	GAAGCGGTACTAAA
Hist1h2ae	AGCTGATGTGTGAT
Hist1h2ae	GAATTACAACGAAG
Hist1h2ae	ATGGTGTCACTAAC
Hist1h2ae	TTGCCATTTTATAG
Hist1h2ae	CAACTCTGATTTGA
Hist1h2ae	AATACAATCTAATT
Hist1h2ae	ACATTGACGCAAGA
Hist1h2bc	CGCTACTACTTGAT
Hist1h2bc	GCAGCTTTTATAGT
Hist1h2bc	AAGTAGTGGGTTCA
Hist1h2bc	AGCAGATTTTCTAT
Hist1h2bc	GTTTATGCTAATGA
Hist1h2bc	TATAGTAGGTTCCT
Hist1h2bc	AGCGTTTACTACCC
Hist1h2bc	AACGCCCTATAAGT
Hist1h2bp	CCAGCCAATCGCGT
Hist1h2bp	TAAACGCCTCCCAT
Hist1h2bp	AGAGCCTACGCGAT
Hist1h2bp	ATGGAACTACGCTT
Hist1h2bp	AAGCGTAGTTCCAT
Hist1h2bp	AGCTTGGCCTTTAT
Hist1h2bp	GGAGAATCCTATAA
Hist1h2bp	TCGTCTAGACCAAT
Hist1h3g	GAGGGGTACGAGCG
Hist1h3g	CGCAGTAGTACTAT
Hist1h3g	AGTACTATTGGCTG
Hist1h3g	CCTGCACACCCGAT
Hist1h3g	GCTTCTCGGTGGGA
Hist1h3g	CTCGGTGGGAAGGA
Hist1h3g	GGATGCTTCTCGGT
Hist1h3g	AGGAGACTGTGTGC
Hist1h4n	ctaataggagttga
Hist1h4n	taggagttgaaggc
Hist1h4n	aggggcaggctaat
Hist1h4n	ttctaggacatcta
Hist1h4n	tggcctggagttct
Hist1h4n	gttgaaggctggac
Hist1h4n	aggctggactggcc
Hist1h4n	AAACCTGTAGTGCA
Hist3h2ba	GTGAAGGAACGTTG
Hist3h2ba	TGCCAATACACTTT
Hist3h2ba	GCATCGGGCTGTGA
Hist3h2ba	CCGATGCACAGCCG
Hist3h2ba	CCCGGCTGTGCATC
Hist3h2ba	ATACACTTTCGGAT
Hist3h2ba	GGATACTGTCCAAT
Hist3h2ba	TCCCTCATTAGCTG
Hivep1	CGGGCCGGCTTCAC
Hivep1	CCCTGGCCCTGGTA
Hivep1	GTGAAGCCGGCCCG
Hivep1	AGGCGCGGCCCGAA
Hivep1	GCAGGGGATccccg
Hivep1	ACCCAGGACGCAGG
Hivep1	CGGGGAAGCCCGGC
Hivep1	GGGCGGGGCAGCAG
Hmga1	ACTGTGAGAAACGA
Hmga1	GAGCAGCCTGGCGT
Hmga1	GGGGACACACCTAC
Hmga1	CGGAGTCCACGGGG
Hmga1	GCCCCCCGGTGACA
Hmga1	GAGGCCCTCGACAT
Hmga1	GCGCGCGGTTTCCG
Hmga1	GAGGCCGGAGTCCA
Hmgcll1	ATATGGTGCTCTCA
Hmgcll1	AGTTAATTGAGGCA
Hmgcll1	GCGGGACGCGCTCC
Hmgcll1	GCCAGATCCTGGAT
Hmgcll1	GGGGGGTATATCGG
Hmgcll1	GAGCTGCACTGCGG
Hmgcll1	TAGAGCTCTGACTC
Hmgcll1	CCCTCCGTAAAATA
Hsp90ab1	TGGTTCCTGAGTCA
Hsp90ab1	CCTGGCTGTAATCA
Hsp90ab1	TAGCAGATCGTGGA
Hsp90ab1	GCCAAGCAGAACCC
Hsp90ab1	AGGAGCGGGACCCC
Hsp90ab1	CCTGATTACAGCCA
Hsp90ab1	CAGCCACTCCTTTA
Hsp90ab1	TCCAGTGTCAGATA
Hsp90ab1	CCTCAAGATGAGCA
Hsp90ab1	GCTTTCCTATTCAT
Hsp90ab1	ATGGTAGCAGATCG
Hsp90ab1	GGCTGTAATCAGGG
Hsp90ab1	CTGCTCATCTTGAG
Hsp90ab1	CACTCCCACTGTCA
Hsp90ab1	CTCCTGCAGAAATG
Hsp90ab1	GGATGACATCACGC
Hspa1a	AGGCCTGTGTGGAA
Hspa1a	CCAGGCATCTCCCT
Hspa1a	GGGTCTCCTAAACT
Hspa1a	GCGACGCATTACTA
Hspa1a	GAGGATCACGTCAC
Hspa1a	GATGGAACCAGATT
Hspa1a	CAATCGCGTTACAA
Hspa1a	CATTGTAACGCGAT
Hspa1b	TTCGGGGTCCCTGT
Hspa1b	TTCGCTAGAGAGTA
Hspa1b	GGGTGGTGAGAGTG
Hspa1b	TATTGACACTGTTG
Hspa1b	GCGACGCAACTTCG
Hspa1b	CTGAAGGTGCTGGG
Hspa1b	AGAGAGGCGGGATA
Hspa1b	CTCCTGAAGGTGCT
Hspa1l	CCAGGCATCTCCCT
Hspa1l	GGGTCTCCTAAACT
Hspa1l	GAGGATCACGTCAC
Hspa1l	AGGCCTGTGTGGAA
Hspa1l	AGTTCTGAATATGG
Hspa1l	GTTGCCGGGAGGGG
Hspa1l	CATTGTAACGCGAT
Hspa1l	TCAAAGTTGCCGGG
Hus1b	CCTCAGGTGTAAGT
Hus1b	TAGGGCAGGTAGGT
Hus1b	GGGCAGATGCTACA
Hus1b	CCTGAGGCCACCGA
Hus1b	TGCAGGCAGTGCTG
Hus1b	ACCCCAGTCTTGGT
Hus1b	GTCCCAGGCCGGAA
Hus1b	GTAGCATCTGCCCT
Id4	ccgagggcggggat
Id4	gcggggatgggcgg
Id4	gccgggcaacccga
Id4	CGGGCCAATGGGAA
Id4	ggaggtggcgaggg
Id4	GGGGAATGACGCTC
Id4	gggcaacccgaggg
Id4	TGGAGAGTGCCCGA
Ier3	GCAGTTGGCTGCAA
Ier3	GCACGTTCTTTCCT
Ier3	GGACTTCACTAAGG
Ier3	AGGAAGCAAAATGT
Ier3	TGAGGTAGCTAGAG
Ier3	CTCCCCAGCTGCGA
Ier3	GCCCTTCGCAGCTG
Ier3	CCAGCTGCGAAGGG
Il17a	AAGCATGACTTCTT
Il17a	AAGGTAGATGGGAA
Il17a	CAAGAGTGGGTTGG
Il17a	CCGTCATAAAGGGG
Il17a	AACATCTGTCTCGA
Il17a	CCACCCCTTTATGA
Il17a	GTCTCGAAGGTAGA
Il17a	ACTTACGTCAAGAG
Il17f	GGGCTTAGAAGAGA
Il17f	AAGGGGGACCCTAA
Il17f	AAGGGGAATCAAAG
Il17f	ATGGGAGTGGAAGT
Il17f	AGGTCAGTGGAAAC
Il17f	GTAGTAAAGGTAAT
Il17f	TTACCCCCATTCAC
Il17f	GAATCCAGTGAATG
Ip6k3	CCACCTGACCCTCT
Ip6k3	GCCCAGCTGTCAGC
Ip6k3	aggaaagacgagga
Ip6k3	gaaggggaaaattt
Ip6k3	gagtaggagaaggt
Ip6k3	TGACAGCCTAGATC
Ip6k3	GCCTAGATCTGGAC
Ip6k3	GGTATCCACAGCTC
Irf4	GCCCACCGGGTCAA
Irf4	AGCCCTTGACCCGG
Irf4	GCCACGCCCTCTCA
Irf4	ACGCCCTCTCAAGG
Irf4	CCTGGGTGTCCCGC
Irf4	CTGCACTCCGCCTC
Irf4	CAGAAATCCTCAAC
Irf4	CGACTTGTCCCATC
Itpr3	GCGCGGTGTAGAAG
Itpr3	CTGGGGATCTCCGA
Itpr3	GCGCGGGTGCACGT
Itpr3	ACCCCCAGGCTCTA
Itpr3	GCTGGGCGCTTTAG
Itpr3	TGGGGGTCGTCCGG
Itpr3	GCCCAGCTTGCCAC
Itpr3	CCGCGCCCCAGGCT
Jarid2	AGCACCACAGCGGA
Jarid2	CGGCAGCACCACAG
Jarid2	TGGCGAATTAGCCG
Jarid2	GCCCCGGCCCGGTG
Jarid2	GCAGGTAGACGTGA
Jarid2	TCCGCACCGGGCCG
Jarid2	ACTGGGCTCGGCGT
Jarid2	AGGCGCCTGACGGG
Kcnk16	GCTTGGGCCCCTCA
Kcnk16	GGGAAGGCTCACGA
Kcnk16	GGCTCAAACACAGG
Kcnk16	GGCAGCAAATGCTT
Kcnk16	AGACACCTGTGCGG
Kcnk16	GAGCCCACTCTGCT
Kcnk16	AAACAAGGCTGGGT
Kcnk16	GCTCACGAGGGTGT
Kcnk5	GGGCGGGTTCCGAA
Kcnk5	GGCTCCTGGAAGTC
Kcnk5	ATCCCGCGACTGTG
Kcnk5	AGCCACACAGTCGC
Kcnk5	GGGTGGAGTCCATT
Kcnk5	CAGGCTTGGGAGTA
Kcnk5	TCCTGGAAGTCTGG
Kcnk5	GAGCTTGGAGAACC
Kctd20	GAGGCCCCGGCCTA
Kctd20	TCCGCCATAGGCCG
Kctd20	GGCCGGCCGGGAAC
Kctd20	CTCGAAGGTGAAAG
Kctd20	GCAGGTGATGGCGC
Kctd20	gcggACTCCGCCAT
Kctd20	GCCCCGGCCTATGG
Kctd20	GGGGCTCTTCGCCA
Kdm1b	CTACGCGTTCTGGG
Kdm1b	TCCCTAGTCAAGTC
Kdm1b	GCCCAGAACGCGTA
Kdm1b	CTAGTCAAGTCTGG
Kdm1b	GCCCTACGCGTTCT
Kdm1b	GGGCTGAACATGAA
Kdm1b	GTGGCGGAAATCAT
Kdm1b	TTAAATTCGGAGGA
Kdm1b	TGGGCGGCCTGGGT
Kdm1b	TCCAGACTTGACTA
Kdm1b	GAGACCTTGCTTCG
Kdm1b	GGAGGTACAGCGTG
Kdm1b	TGCCCAGGACACGC
Kdm1b	ACTGTTAAATTCGG
Kdm1b	ACAGGGTCCTGGGA
Kdm1b	GGAGGAGGGTGGAG
Kif13a	CCCGGAGCGGAAGA
Kif13a	GCGCCCGGGCTGTA
Kif13a	AAGGCGAGCGTCTC
Kif13a	GGGGCGCTTTACAA
Kif13a	GCTGCAGACCGGGA
Kif13a	GGGACGCTCTGCAA
Kif13a	CCGAGCGGCTAGAG
Kif13a	GCCGGGACACGGGA
Kif6	AAATAGACACACTC
Kif6	TGCTCTTGGGATGT
Kif6	TGGACTAAAAGGAG
Kif6	GCCGCGCATGTCCG
Kif6	GGAAGGACTTGTTA
Kif6	ACGTACAGGAGTTA
Kif6	TGGGAGATGCTCTT
Kif6	TTAGGGATAGGAGG
Kifc1	AAGGGGTCTAGTTC
Kifc1	CTTCCTGAGGTCTC
Kifc1	GTCTCCAGTCTACA
Kifc1	CGCGCTCGGCGCTC
Kifc1	CTCGGCGCTCGGGA
Kifc1	AGCGCGGCTTCCTG
Kifc1	AAAAGTGGCGGGTG
Kifc1	GCCTGAGCGGGGTC
Klc4	GGGAAGAATCGCGG
Klc4	CCGTATCTGAGATC
Klc4	TTGACGGAGAACGA
Klc4	TGAGAAGGGAGACC
Klc4	ACCGAGCTGGAATG
Klc4	AGGGTGTTTGTCCT
Klc4	CAGGCTCTGGATGA
Klc4	GGCTACCGCCTCCG
Klhdc3	TGAAGGTGCGGGTC
Klhdc3	AGGGCCGAAAGATG
Klhdc3	GGCAGGACATGCTG
Klhdc3	CTCGGGCACGGGGC
Klhdc3	GCCGAGAATCAGTG
Klhdc3	CAGTGGGGCGGGTA
Klhdc3	CGCCTGAGGGTCAC
Klhdc3	TGTGGGCTCTGAGA
Klhl31	CGAGGGCAACGCTG
Klhl31	CTGAAGACCAAAGA
Klhl31	GGCGGTGCCCTGGT
Klhl31	AACGCTGGGGAAGA
Klhl31	CCAGGCCAGCACGC
Klhl31	GACCAAAGAGGGAG
Klhl31	GGTGCCCTGGTTGG
Klhl31	CTCTCCACCAACCA
Lemd2	cgccATGATGGGAA
Lemd2	ccgcgcgccATGAT
Lemd2	CATATTGGGAAGGG
Lemd2	GGGAAGGGCGACCA
Lemd2	CAATATGGCGTCCG
Lemd2	AGGGCGGCGCATGG
Lemd2	gcgggAGCAGTTCC
Lemd2	GGAACTGCTcccgc
Lhfpl5	GCGCAGAGCCTGGA
Lhfpl5	CGAAGGGTGACTAG
Lhfpl5	AGGGGCGACTTGGA
Lhfpl5	CTGGAGGGGCGACT
Lhfpl5	GTGGAGGTCCCCGA
Lhfpl5	AGCGCCAGAGTTCG
Lhfpl5	CGAGACCAGAGTGG
Lhfpl5	GCGTGGCCTGGTAG
Lrfn2	GGGGCTGTGGATCC
Lrfn2	GTGGGGGGGGCCAG
Lrfn2	GCCAGCGGCCACTG
Lrfn2	GCCTTGGGTTTCTA
Lrfn2	TGCGGGGAGTGCGG
Lrfn2	CGCACGGATCTGTG
Lrfn2	aGCGGTCGCACGCA
Lrfn2	AGTGGTGTGCATGC
Lrrc1	GCGACTCCCCGCGG
Lrrc1	TGTGCGACTCCCCG
Lrrc1	AAAGCTCCTAAGGA
Lrrc1	CGGCGGCACGCAGA
Lrrc1	GGAGGGTCGGGAGA
Lrrc1	GCTCCCGGGAGGGT
Lrrc1	GCGTGTCCCGGCCG
Lrrc1	AGGAAAACCCGGAG
Lrrc73	GGGAAGTAAGTAGA
Lrrc73	ATGCAGTTTCACGT
Lrrc73	AGAACTAGGATCTG
Lrrc73	TAGGGCAAAGAACT
Lrrc73	CTGCATGGACCACG
Lrrc73	GGATCCCTAGGTTA
Lrrc73	CGTTGCGTGTCTTA
Lrrc73	CATGCAGGGACGGG
Lsm2	ACGAGCTAATCACG
Lsm2	TATGGGGAATTATT
Lsm2	tccaggattccagt
Lsm2	GCTCGGGAGGAAGT
Lsm2	CGCCAAACCGGTAG
Lsm2	ACAAGCGCATGCGT
Lsm2	CGCTTGTGAGAAAG
Lsm2	GAAAGCGGCTGCTC
Lst1	ATGAGGACTGTAAA
Lst1	CCTTGCCTCAGAGA
Lst1	CAACGCAGCCCTAT
Lst1	catctCTACCAATA
Lst1	GTTCCCCATCTCTG
Lst1	TCCTCATCCTCACT
Lst1	CTGGCCTGGAAAAT
Lst1	gcgaacaaaagccg
Lta	TAGGAGAGAACCGC
Lta	GAACCGCAGGCTAA
Lta	CGCAGGGACTAGCA
Lta	TGGGGAAGCCCCCA
Lta	GGGAGTCGGGTCCG
Lta	TGCGTTCTGGGAAA
Lta	GGTCCGGGGAACTG
Lta	TGGGAAAGGGAGTC
Ltb	CAGCGCTGGGGCCG
Ltb	GTAAAGATGAAGAG
Ltb	GTGGCTGGATGCCT
Ltb	AGGCAGAATTAAGT
Ltb	GGTAAACAGGAAGC
Ltb	AGAGGGTCGTATCA
Ltb	CCAGGCAACAAACA
[truncated: 2,161 more rows]

## Sheet: Chr9p gRNAs
Mouse Homolog	gRNA Sequences
1110017D15Rik	ACGTCTCTAATGTG				Total gRNAs	1355
1110017D15Rik	AGGGAACTTAGGAG
1110017D15Rik	CGCGGGCAAGGTGA
1110017D15Rik	CGGCAGGGTGGTAG
1110017D15Rik	CTCTAATGTGGGGA
1110017D15Rik	GACAAATGACATAT
1110017D15Rik	GGATACTAGAACCG
1110017D15Rik	GTTCTGTTTCAGAG
1700022I11Rik	AACTATGAATGTTT
1700022I11Rik	AGATTTCACCATCT
1700022I11Rik	CAATAGCCTACTCC
1700022I11Rik	CAGCTCATCCCAGA
1700022I11Rik	CAGGAGTAGGCTAT
1700022I11Rik	TAAGCTCCAGGAGT
1700022I11Rik	TATTGGATTCACGT
1700022I11Rik	TGAAAACTAGAGTC
4430402I18Rik	CAGTGACTGTCTAA
4430402I18Rik	CCACAGTGTGTCCA
4430402I18Rik	CTCACCCTCCCTGG
4430402I18Rik	CTGGAACTCCTGCG
4430402I18Rik	CTGTCCACGGATGT
4430402I18Rik	GCCAGGCTACCACC
4430402I18Rik	GGCTACCACCAGGG
4430402I18Rik	GGTGAGAAGACGTA
9930021J03Rik	ATGCGTAGTAGCAC
9930021J03Rik	CCGCAGGTAGACAG
9930021J03Rik	CTTGGCTCTCCCAC
9930021J03Rik	GAAAGCCCTGGACT
9930021J03Rik	GGCCGGGGAGAGCC
9930021J03Rik	GTAGTAGCACGGGA
9930021J03Rik	GTCTGTAAGGGGTG
9930021J03Rik	TGGCGCAGTCTGGA
Acer2	CAAGCCTAGAGCCC
Acer2	CACTTCAGCAGCAG
Acer2	CAGCCCCATTTCAG
Acer2	CGAAAGAAAGCCGA
Acer2	GACAACCATTGCCC
Acer2	GAGCCCCTGAAATG
Acer2	GGGCAATGGTTGTC
Acer2	TGTGACAAGGTGAC
Aco1	ATGGGCGGAGTCTA
Aco1	CCATCTGCCAAGAT
Aco1	CCTTGGGGCGGAAT
Aco1	CTGCCAAGATCGGA
Aco1	GCAGACCATACCGA
Aco1	GGAACCAGCTGCTG
Aco1	GTGCGCCCTCCCTT
Aco1	TTGCAGCTTCTAGA
Adamtsl1	AAGGCAGGGGAGCA
Adamtsl1	AATCTCTCTAGAGC
Adamtsl1	AGATAGATGTGCAC
Adamtsl1	AGCAGGAGTCTGAT
Adamtsl1	CAAAGCGGTTGGGG
Adamtsl1	GCTGAATAACAAAG
Adamtsl1	TAACAAAGCGGTTG
Adamtsl1	TTCAGTCCCGACTA
AI464131	CAAAGGGCAGATCT
AI464131	CAAGGCACGCAGAG
AI464131	CAATGGTCTGGCAA
AI464131	GAGGCGGGCCCAAA
AI464131	GCCTGAAACCACAT
AI464131	GGCACGCAGAGTGG
AI464131	GGCTAGCAATGGTC
AI464131	TGGAATCAAGCTAG
Ak3	AGCACAGGGCACGA
Ak3	ATGCCAAGAGGCGC
Ak3	CAAGAGGCGCCGGG
Ak3	CCGGAAGTGAGCGA
Ak3	CGGGTGGAGCTCAA
Ak3	CTAGAAGTAGAACG
Ak3	GGACCAGGCAGCAC
Ak3	GGAGCTCAAGGGAG
Aldh1b1	ACAAGGTCTGTCAA
Aldh1b1	ACCCCACCTCTCTC
Aldh1b1	AGAGGATTCTGATT
Aldh1b1	CTAAGATTAGGCTA
Aldh1b1	CTGGACCTAAGATT
Aldh1b1	CTTTTGATTGTCAA
Aldh1b1	GCTAGGGGAAATCA
Aldh1b1	GGGCATGTGATCCT
Aptx	ACAGCAGTCTTCTG
Aptx	AGCTATCCTCACGG
Aptx	AGGAGCTATCCTCA
Aptx	CCACTGTTCTACCT
Aptx	CGGGGGACAACTAG
Aptx	GAGGCTGCGAGCAA
Aptx	TTCAGACAACCGGG
Aptx	TTCTACCTGGGTAT
Aqp3	AGTGTTGTACTGAG
Aqp3	CCGCGGGGTTCCGA
Aqp3	GCTGGTGGGGACGC
Aqp3	GGATACTGTGAAAA
Aqp3	GGGTGACAGTTGTA
Aqp3	TCCAGGCTAGGTGG
Aqp3	TCGGAACCCCGCGG
Aqp3	TCTGCAGGATTCTT
Aqp7	AGGGGTCCCCATCT
Aqp7	AGGTCAGTAGGGCA
Aqp7	CCTCATAGTCCCAG
Aqp7	CTCTGACCTCACAA
Aqp7	GAGACTGAGTTCTG
Aqp7	GCAGAAGGCCACAG
Aqp7	GGCTTAAGTGGCAT
Aqp7	GGGAGAGGTCAGTA
Arhgef39	AGGTGTAGTAGCAT
Arhgef39	CTAAAGTGACACTA
Arhgef39	CTACGGTCTGAACA
Arhgef39	CTGAACACGGAGAC
Arhgef39	GATGCTACTACACC
Arhgef39	GGTGGGGCGGACAC
Arhgef39	GTCGTGCGAGTCCC
Arhgef39	TCGCCTAGCTGGTG
Arid3c	AGACACCTGTTGGG
Arid3c	CCAGCCAGATTCGA
Arid3c	GCAGCGGAAGAGGC
Arid3c	GCCAGATTCGAGGG
Arid3c	GCCCCCCTCGAATC
Arid3c	GCCTGCGGTCCCGG
Arid3c	GGGAAATCACGCGT
Arid3c	GGGCGCAGCGGAAG
B4galt1	ACAAGGCTCGGAGA
B4galt1	CCAAGGCTGCGGTG
B4galt1	CGCGGAACCTGGGG
B4galt1	GCGGGGCCTCAACC
B4galt1	GGAGAGGGGACTGA
B4galt1	GGAGTCTAAGGGGT
B4galt1	GGGCATGAGGGACA
B4galt1	GGGCGGAGTCTAAG
Bag1	CTGCGCATGGGGTG
Bag1_Chmp5	ACGGAAAAGGGATC
Bag1_Chmp5	GAAAACACGGAAAA
Bag1_Chmp5	GAACTGGTGAGTAG
Bag1_Chmp5	GAGCGCGGAGCTCT
Bag1_Chmp5	GGATCGGGAGACTC
Bag1_Chmp5	GTGGGGCTTAGACG
Bag1_Chmp5	TGGCGGAGTGGGTG
Bnc2	ACAACTCGGAGCGC
Bnc2	ACCTGAGCGCCGAg
Bnc2	GAGCGCCGGCTCGA
Bnc2	GCGAGCGCGACCCT
Bnc2	gcggcgagctgagg
Bnc2	GGACTGTCCGGGAG
Bnc2	GGCTGCTGGCGAgg
Bnc2	gggagcaggccgag
Caap1	AACGAGGGAATCGA
Caap1	AGCGCCGGCCGCTA
Caap1	AGCTTCTGGAGGCG
Caap1	CTGCTGAGGTTGTC
Caap1	GCAAACAGATCCGT
Caap1	GCTTACAAGTACGT
Caap1	GTCTGGAGTTTAAA
Caap1	TGCGACAGCAGCGC
Car9	ACCTGGCACTGTAT
Car9	ATTGGTGCGGTAAT
Car9	CCATCTCTACAAAA
Car9	GCAGGTGTGTTCAT
Car9	GCCTTGAGGGGAGC
Car9	GTGCGGTAATGGGT
Car9	TAGGAGCTGGGTAG
Car9	TTTGATATCGGGGA
Cbwd1	ATCTATCTCTGCGT
Cbwd1	GAAGCACGCTCTAG
Cbwd1	GCCCCTTATAGAGA
Cbwd1	GCTTCACACCCGGG
Cbwd1	GGCTGGTTCCTCAG
Cbwd1	GTCCCTCTCTATAA
Cbwd1	TGCCTCCCCCGGGA
Cbwd1	TGTCCACTGTGCGT
Ccdc107	AAGCGACCCCTCCG
Ccdc107	CACGCCTACATCGG
Ccdc107	CAGCGCTGGAACGC
Ccdc107	CGGGGCGAGCTGAG
Ccdc107	GCCCATCTCAGGAT
Ccdc107	TAGGAACGCTAGGT
Ccdc107	TAGGGGAAAGTCCC
Ccdc107	TGAGTCCCTTAAGG
Ccdc171	ACGCGGGCTCGCGC
Ccdc171	CGGAACACGCGACG
Ccdc171	GCAAAGCACACGGG
Ccdc171	GGACGCGGAGGCGA
Ccdc171	GGACGCTGGGGACG
Ccdc171	GTACTCAGAGAACG
Ccdc171	GTATCCTGGAGCTG
Ccdc171	GTGCGCAAAGCACA
Ccin	AACTGGTTTGGGTG
Ccin	AGAGGGaaaattta
Ccin	GACTGTGACTTGAA
Ccin	GACTTGAAAGGCCC
Ccin	gcctctgtgacagg
Ccin	GGGAATGTTCGAAC
Ccin	GTGACGTCATAGAA
Ccin	TGTTCGAACTGGTT
Ccl27a	AAAATTAGATGATT
Ccl27a	AGATGATTTGGCCA
Ccl27a	GCAAGGTAAAAGCC
Ccl27a	GCATTCTATGGGTG
Ccl27a	GTCATTCAAGAACT
Ccl27a	TAGATGTCCGTACA
Ccl27a	TTTCACACCATGTA
Ccl27a	TTTTGTTGCTTAAG
Cd274	agctccaagacaac
Cd274	ATGCTCAAAGGGAC
Cd274	caggggcgcggatg
Cd274	ctgaggtcgggggt
Cd274	gcgagcccgaggtt
Cd274	GGACAAGGCTTCCG
Cd274	gggctgctactgag
Cd274	TTGgagatccacat
Cd72	AGAGAGGGACGCTG
Cd72	AGGAAGTAGGTCTT
Cd72	CTGGACACAGGTCC
Cd72	CTGGAGTAGTGATT
Cd72	CTTAAGCACCGAGG
Cd72	GCTGGACAGGAGGA
Cd72	GGGGTCCAAAATAC
Cd72	TAGGATGCCGGAGG
Cdc37l1	AAGTCGGAGTCGAG
Cdc37l1	AGAAGTAGCCGGCC
Cdc37l1	AGAGCAATCTAAGT
Cdc37l1	CGGAAATGACGTCC
Cdc37l1	CGGCGGCACAGTCC
Cdc37l1	CTGGACTGTGCCGC
Cdc37l1	GAAGAAGAAGTAGC
Cdc37l1	GGACGTCATTTCCG
Cdkn2a	CCCTGCCGCATCCG
Cdkn2a	CCCTGGGCGCCTCT
Cdkn2a	CTGAGGGCGGAGAT
Cdkn2a	GCGAGCGAAGCGAG
Cdkn2a	GCGCGCCTCCCCCT
Cdkn2a	GGAAAGCTTCCCAG
Cdkn2a	GGCTGTCACCGCGA
Cdkn2a	GTCCCCAGTCGCGC
Cdkn2b	ACAAATAGGCGGGG
Cdkn2b	ATGAGACAAATAGG
Cdkn2b	GCAGGCGTGGTCTG
Cdkn2b	GTCACCAAGTGTGG
Cdkn2b	TCTGGAACTTACCG
Cdkn2b	TGGTATCTGAGAGT
Cdkn2b	TTAAAGTTCTGCGC
Cdkn2b	TTAGAGAGCAGGCG
Cer1	AGCCCGAGACCCAG
Cer1	AGGGGGTAATTAGC
Cer1	CTGAGATTTAGGAG
Cer1	GCTAATTACCCCCT
Cer1	GGCAGGTGGTCAGC
Cer1	GGGTAGAATAGACA
Cer1	GTTGTCTGAGATTT
Cer1	TCGGGCTTTCACTG
Chmp5	AGGGTCAGTTCCGA
Clta	AAGGGGAGGAGCCC
Clta	AAGTGCCACCCTAG
Clta	ACGAGTTGTCCCCA
Clta	AGCTGGCAAAGGGG
Clta	CAGCTCCCGATGCT
Clta	CCCAGCTTCCCCTA
Clta	GCTGCCCAATCAGC
Clta	TGACTGGGAGCAGA
Cntfr	agacaaggcgagag
Cntfr	gcCCGCGGTCACAT
Cntfr	GCGAGTGGGAGTGG
Cntfr	gcgcgcctccgcTT
Cntfr	ggcagcggaggcgc
Cntfr	GGTCACATGGGCga
Cntfr	gtgcgcggcagcgg
Cntfr	gtggtgcgcggcag
Cntln	AGCAAGTTCATTGC
Cntln	CCAGCTCCGAGCGC
Cntln	CCTCGGCGGAGCTA
Cntln	GCGGCAAGCCCACT
Cntln	GCTCCGAGCGCGGG
Cntln	TCGCGGTTCCTAGT
Cntln	TGGTCCGGCGATCG
Cntln	TTCTGGATCACTGG
Cntnap3	ACATAGTCTGGAGC
Cntnap3	ACTTAAGTCCCTGA
Cntnap3	AGAGGTACGAGCCC
Cntnap3	GCAGCGCGGGGATC
Cntnap3	GCGCTGCGCGTGTA
Cntnap3	GGAGTCACATAGTC
Cntnap3	GGGCTCGTACCTCT
Cntnap3	TCAGGGACTTAAGT
Creb3	GAGAGTGTGTCGAA
Creb3_Tln1	CCGCCCTGGGGCGT
Creb3_Tln1	CGGAAGTGGCTCCT
Creb3_Tln1	CTTCCCACGCCCCA
Creb3_Tln1	GCAGGAAGCTGCTC
Creb3_Tln1	GCGCCACGTCCCGG
Creb3_Tln1	GCGCTCTATGGTAG
Creb3_Tln1	GGGCGGGGATTCTG
Dcaf10	AGGACTGTGAAGTC
Dcaf10	CGCCACAACCTAGG
Dcaf10	GCGGCCCGGAATAG
Dcaf10	GGGACGTAAAAGCA
Dcaf10	GGGCGGGGACGAGA
Dcaf10	GTGCGCCACAACCT
Dcaf10	GTGTGTGCAATGTA
Dcaf10	TGCTGGTTGTAGTC
Dcaf12	CCGCCCTGCTGGTC
Dcaf12	CGCCCAGACCAGCA
Dcaf12	CTGCGCAGGAGTGA
Dcaf12	GCGGAAGTTCTCCG
Dcaf12	gggcgaacagatga
Dcaf12	GGGCGGTGTCTCCG
Dcaf12	TAAGCTGTGGCCAA
Dcaf12	TGGCGGTTAAGCTG
Dctn3	ACCAGGGTAGAACT
Dctn3	ATGTCAAAGCAATC
Dctn3	CCAGAACGTTACCT
Dctn3	CCCTCAGGCTGTTC
Dctn3	CGGTGCTCTCGGAT
Dctn3	CTAGGTAACGTTCT
Dctn3	GCCTACTGATCTAT
Dctn3	TCCTAGTTCTACCC
Ddx58	CGCAGCTTTTCGCG
Ddx58	CTGCCTCAGGGCGC
Ddx58	GCGCCCCAACTTAA
Ddx58	TAAAgaagagttga
Ddx58	TCCTTGCGGTTCAG
Ddx58	TGTGGAAGAGGTAa
Ddx58	TTCCACAGATCAGC
Ddx58	TTGCCTTTAAGTTG
Dennd4c	AACTGCCGACCGAA
Dennd4c	AAGAGCGGAAGGAA
Dennd4c	CAAGCGCAGAGGCG
Dennd4c	GAGCCCAACCACAG
Dennd4c	GGGCGTGGCTCTAG
Dennd4c	GTGGGTCAACCTCT
Dennd4c	TGGCAGAATTCTGG
Dennd4c	TGGTAGGAGTCTGG
Dmrt1	ACGCAATCCTCGGA
Dmrt1	AGAGTTCCTCGTGC
Dmrt1	CAATGGTTGCTTGG
Dmrt1	CCATAGAGGCCTCT
Dmrt1	GCAGTGGATGGAGT
Dmrt1	GCTGCACACGGCTG
Dmrt1	TAGTCGACCACACA
Dmrt1	TGGTTGCTTGGAGG
Dmrt2	AGAAGGTAACTAAG
Dmrt2	CCCGGCTGCAGCGA
Dmrt2	CGGGTGGACTCCGG
Dmrt2	GCAGAGCTCGGGGT
Dmrt2	GCAGCGAAGGCTGG
Dmrt2	GGGAAGCTTCCACT
Dmrt2	TGGCCGGAGCACTA
Dmrt2	TGGCGGGTGGACTC
Dmrt3	AGGAAAGCGGTCTA
Dmrt3	CCGCGGTACCGCAG
Dmrt3	GAGGGGTGCCTGCC
Dmrt3	GCGCTTGGCAGAGG
Dmrt3	GGCAGGCACCCCTC
Dmrt3	GGGACCCCGATTgg
Dmrt3	GTGCAGGAACCCGA
Dmrt3	TCCCGGCTCAGGAA
Dmrta1	AGGCTGGCCAAGGA
Dmrta1	CCCGCCCACTGGGT
Dmrta1	CTAGGGCGGAGAGT
Dmrta1	CTGGCCAAGGAAGG
Dmrta1	GACTTTCTGGGAGG
Dmrta1	GAGTGGGACTTTCT
Dmrta1	GGGTAGGCTGGCCA
Dmrta1	TGGGACTTTCTGGG
Dnaic1	GCCCTGGACCGGTC
Dnaic1_Fam219a	AGGAGGCGGAACTT
Dnaic1_Fam219a	CCCGCAAGTGGGAA
Dnaic1_Fam219a	CGGACACGGGGAGG
Dnaic1_Fam219a	CTCCGGACACGGGG
Dnaic1_Fam219a	GAGCTCCCGCAAGT
Dnaic1_Fam219a	GCCCCCTCCGGACA
Dnaic1_Fam219a	GCGCAGGGATCCTC
Dnaja1	AGGCTCGGGAACCC
Dnaja1	CAAGGGCCTTGTGG
Dnaja1	CTCGGCTACAAAAG
Dnaja1	GAAGCACTCGTCCC
Dnaja1	GAGCCCGTAAGCCG
Dnaja1	GCCCAGGTAACCGA
Dnaja1	GTGGACTCAAGCCC
Dnaja1	GTGGCTGCGCCCAA
Dnajb5	AATGTGTGCGCGTG
Dnajb5	AGGTGGCTATCACC
Dnajb5	CCGCCCATCTGCGG
Dnajb5	CTCCTCACCGGTGA
Dnajb5	GGACGCTCGTTGAG
Dnajb5	GGGCGGAGAAGAGG
Dnajb5	GTGCGCGTGTGGCC
Dnajb5	TGGCCGGGTGACAG
Dock8	AGAAGCAGCCAGCG
Dock8	CCGGAGGGCGACTG
Dock8	CCTCCAGACCCCGC
Dock8	CGAGCGCTTGGCGA
Dock8	CGGGTCAGCGGCGG
Dock8	CGGTCCCGGGTCAG
Dock8	GAGGGGCCACCCGG
Dock8	GCCGGAAACGCCGG
Elavl2	ACACGGCAGTGCGG
Elavl2	AGACGCTTCTATTG
Elavl2	AGATGCAGCCGTGA
Elavl2	CCCAGGTTTCTGAT
Elavl2	CCGGGATAGGACTC
Elavl2	CTCTGCTAGGTGAT
Elavl2	GAGAGCAACGTGGG
Elavl2	GCAGAGCTTCGCCT
Enho	agcgGCCCCGGCCG
Enho	AGCGTCGAGgagtt
Enho	CGAGgagttcggct
Enho	cggcgggagggagt
Enho	cggctacggcggga
Enho	gGCCCCGGCCGCGG
Enho	GGCGCCGCCCCAGG
Enho	TCCTCCCCCTGGGG
Eqtn	CAGATATCTAAAAC
Eqtn	CTTAAGGAATTTGG
Eqtn	GACATAAAAACTTA
Eqtn	GAGTCACAAAGCTC
Eqtn	TCAAATAGTCTATA
Eqtn	TCCTAAGTCTCAAT
Eqtn	TCCTATTGAGACTT
Eqtn	TTTTCTGGGGAAGA
Ermp1	AGGGAACAGCGAGG
Ermp1	CAGCAGACTGTCAA
Ermp1	GAGTCTGAGATCTT
Ermp1	GCCCGGACTGTCGC
Ermp1	GCCTCGCTGTTCCC
Ermp1	GGGCTGATGAATAC
Ermp1	GTCGCAGGCTGGGG
Ermp1	TCCTAGTGAGCGGA
Exosc3	GAGATGACCCTGGT
Exosc3	GAGATTGTTACATT
Exosc3	GCCTTCAGTGCTGT
Exosc3	GCGGAAGTAGATAC
Exosc3	GGAGTAGCACCCAT
Exosc3	GGGACCGGAGTCGG
Exosc3	GGTGTGATGTGTGT
Exosc3	TCAAGTAGGTGAAA
Fam166b	ACTCCGGGAAGACC
Fam166b	CTGCGAAagcctct
Fam166b	GAGTTGGCGAATGA
Fam166b	GCCGCTCTGTCACT
Fam166b	GCGGCACCCACTCC
Fam166b	gggtggaaggcaag
Fam166b	TGTCACTTGGAAAA
Fam166b	TTGGAAAAGGGCAG
Fam214b	AACAGCAGCTAGAG
Fam214b	CAGCACTGCGACCA
Fam214b	GAGCGACATTGGGT
Fam214b	GCTGGGCGCTGGGC
Fam214b	GGACCGTCGCAGGG
Fam214b	ggAGGGACCGTCGC
Fam214b	TGGTCGCAGTGCTG
Fam214b	TTGAGGTTGCTGAG
Fam219a	ACAGCTGACGTTGT
Fam221b	aaggggtggaacaa
Fam221b	CTTTGGATCTAGTT
Fam221b	GAACACGGCCCGAG
Fam221b	GCAGACCTAGGAAT
Fam221b	tgggaattgtgaca
Fam221b_Tmem8b	AGGGCCGGGCGGTG
Fam221b_Tmem8b	GAGGCTTGAGACAG
Fam221b_Tmem8b	TCTCCCAGTGAACG
Fancg	CAGCAGTTCGTCCT
Fancg	CGAAAACTAAGGAC
Fancg	CTGCTGGGTCTGCA
Fancg	GCAGGGCCTCCGCG
Fancg	GCGCCGCCAGAGAC
Fancg	GGATGAGATTACCA
Fancg	GTTGAGGCTAGTTT
Fancg	TGCCGTTGGTTCTA
Fbxo10	CCGGAGGCTCCTAG
Fbxo10	GCGGGAACTGCCGG
Fbxo10	GCGTGGCCTCCGAA
Fbxo10	GGCTCGGCGATGGA
Fbxo10	GGGAACAGCATCGT
Fbxo10	GTGAGACTGGAAGG
Fbxo10	TAGGGGCCTGGAAG
Fbxo10	TGTTCCCACCCCTT
Focad	CATCCCAGCAGAGG
Focad	CCGCCTCCGAGCGG
Focad	CTTCGCAGGGGTGC
Focad	GCAGTGAGCCGCCA
Focad	GCATGCGCGCGAGG
Focad	GCGAAGTCTGGCTG
Focad	TCTGGCTGTGGCTA
Focad	TGACAAGGCCTTGG
Foxd4	ACAACCATCCACTA
Foxd4	ACCATCCACTACGG
Foxd4	ATGTCAGAGCACTT
Foxd4	CGGTCCAATGATGG
Foxd4	GCGTCAGGAGGACG
Foxd4	GGACCCCCCATCAT
Foxd4	TCCAGCCCGAGGAA
Foxd4	TCCTCCGTAGTGGA
Frem1	ACGCCCTTCTCTGG
Frem1	CCCGACCTCCCTGG
Frem1	CCGCCAGGGAGGTC
Frem1	CGACCTATTAACAA
Frem1	GAGCCCGACCTCCC
Frem1	GAGGCTCCCCGCCA
Frem1	GTTAATACTGAGGA
Frem1	TGCTGGTTGGTCAG
Frmpd1	CACTGAGGCTGGGA
Frmpd1	CCCGGCGGGTGAGT
Frmpd1	CTCAGTGTTCCCGT
Frmpd1	CTGGGCCGTCGCAG
Frmpd1	GCCAGAGCTTAGAA
Frmpd1	GCGCCGTCTGGCGG
Frmpd1	GCGTATCCCCCGGC
Frmpd1	GGCCAGCCGAGGCA
Galt	AAGTAGCTACAATC
Galt	ACACGTGACGGTGG
Galt	ACGCTCACTTCCCC
Galt	AGCCTGCCACTTGA
Galt	CCACCGTCACGTGT
Galt	GCATCTGTGAAAAC
Galt	TAGCCAATCATCCA
Galt	TGGGGAAGTGAGCG
Gba2	AAGTCGGACCGGAA
Gba2	ACGTGGAGCCTCGA
Gba2	AGCCGGTCTCGCAG
Gba2	CCCGCAAGTCGGAC
Gba2	CGCGACAGACTCCG
Gba2	CGGTCTCGCAGGGG
Gba2	GGGGCGGGTAGGTG
Gba2	TCGCAGGGGCGGGT
Gldc	ATGCTGGAAGTTTA
Gldc	CCGCTTAAAGTGTG
Gldc	CCTGCTGCTGAAGA
Gldc	CCTGTGTAAGAAGA
Gldc	CTAAAGTCAGTAAG
Gldc	CTGGCCGGGTTGTA
Gldc	GGGAATGGGTTGCA
Gldc	GGGTTGCAGGGCGG
Glipr2	ATGCATAGCGGGAC
Glipr2	CCCTAGAATTCATT
Glipr2	CCGACGCCTGGAGA
Glipr2	CGTGGGGAACTACA
Glipr2	CTGGTGGCGCCGGA
Glipr2	GGCGGAATCCCACC
Glipr2	GGGAACTACAGGGA
Glipr2	GGGAAGCAGAACTT
Glis3	AAGGTTGCTTGGAT
Glis3	ATGAACGGGATAAT
Glis3	CAACCTTCTCCCTT
Glis3	GCAGGGCACAAATG
Glis3	GCATGAATAAGCGA
Glis3	GGGCCACATTATTA
Glis3	TGGCCCAAGGGAGA
Glis3	TGTGTTTCACGGTC
Gne	ACGGTCGATCGCTC
Gne	CGCGGAGCGCCGAA
Gne	CTGGGACCCGGTGC
Gne	GGCTCCGCCTGCAC
Gne	GTCGCCTCTGGTAG
Gne	TAGTGGCATCCACT
Gne	TCAGGCGAGAATAA
Gne	TCGGGCTTAACTGT
Grhpr	AGTGTCCCGGATAG
Grhpr	CAGAGCCTCTATCC
Grhpr	CAGCATAGTCAGAG
Grhpr	CTATCCGGGACACT
Grhpr	CTCTGTGTTAGTGT
Grhpr	gcccgggACCTCTA
Grhpr	GGGCATTATGAGGA
Grhpr	ggggccggcgttag
Haus6	AAGGTCCGGAAACC
Haus6	ACGCAATGCTTTGT
Haus6	AGCCAATTGCCCCA
Haus6	ATGTGCCCGGAGAC
Haus6	CAGTCCCGGAAGTC
Haus6	GATGCATTGCATGG
Haus6	TTATAGTTTCTCTC
Haus6	TTGGGGCAATTGGC
Hint2	AATATCCCACCCCC
Hint2	CCTTCCAATGGAAT
Hint2	CGAGCGCTTGGTCA
Hint2	GAGCTAAAAGGGAC
Hint2	GCGCTTGGTCAAGG
Hint2	GCGTAGGGACCCAA
Hint2	GGCCAGAGCTAAAA
Hint2	TTGAGGGGTAAGGG
Hrct1	CAGCCAGGGAATGT
Hrct1	CTGGCTTGCTTAAG
Hrct1	CTTGCTTAAGGGGA
Hrct1	GAATCAGGGATATG
Hrct1	GAGGCAGGAATAGA
Hrct1	GGGAGAGGTCTGTT
Hrct1	GGGGGAGGCCGTGA
Hrct1	TAGTCGCGGAGCTA
Ifna13	AACACCCTTTGGTA
Ifna13	ATTGGGAAGTTAGA
Ifna13	caggttggaggaat
Ifna13	CCACGCCCTACCAA
Ifna13	CCTTTGGTAGGGCG
Ifna13	ctatgcactatatc
Ifna13	gacttgaagccctt
Ifna13	GTGGAACAAAAAAG
Ifna14	AACAGCTTTCAGAA
Ifna14	AGCGGGGAGATACT
Ifna14	AGGAAAGAGATTTC
Ifna14	GACACTGAAAGATG
Ifna14	GCATAGTCTTTGCT
Ifna14	GGTCTGGGACAGCG
Ifna14	GTGAAAAGATTATT
Ifna14	TGAAAGATGGGGTC
Ifna2	ACCCACATGCGTGA
Ifna2	CCCCTCACGCATGT
Ifna2	gcagcaccatgtcc
Ifna2	ggtcctcatagtcc
Ifna2	tcagaagaggcaga
Ifna2	TTGTGGCctggaca
Ifna2	TTTCAATTGTTTAG
Ifna2	Tttttgtagacaca
Ifna4	AACCCACATTCCCC
Ifna4	ATTCCCCAGGGGGG
Ifna4	CACATTCCCCAGGG
Ifna4	cagcaaagcttgcc
Ifna4	CCCCCTGGGGAATG
Ifna4	ccggcaagctttgc
Ifna4	gggctcaaacgtag
Ifna4	TTAAAGAGAAACCC
Ifna5	ACCAGCTTTGGGTA
Ifna5	AGAGGAAGCAATAA
Ifna5	AGTCCActgggcag
Ifna5	CAGTTTATTGGTGC
Ifna5	TATTTAAAGTCCAc
Ifna5	TCCATACCCAAAGC
Ifna5	TGCCCAAACACAAG
Ifna5	TGGAGCAGTGAAAG
Ifna7	AAATATGTTCTTAA
Ifna7	AATTGGAATGAGAG
Ifna7	AGCATAAAAAGAAT
Ifna7	atctacatgagtgc
Ifna7	atgtaattctctac
Ifna7	catgagtatctcat
Ifna7	GAAAATTCAGTCCG
Ifna7	TAATGGCTGTTGAA
Ifnb1	aaatggcacatcaa
Ifnb1	AATTGCTGGAGCAA
Ifnb1	agaaccccacatcc
Ifnb1	AGAGGAAAACTGAA
Ifnb1	cccaaagggagcta
Ifnb1	ctgctcatcctgaa
Ifnb1	gccctttgaaatag
Ifnb1	tgtgccatcctttc
Ifne	AACAGCAACACAAT
Ifne	AATGGGGAATGTAA
Ifne	ATCTGAAACCCTGA
Ifne	GTTCCATAAAACCC
Ifne	TAAAACCCTGGAAT
Ifne	TAAGGTATAAACTT
Ifne	TGAGTGGTAATAGT
Ifne	TTCAGATGCGTGAG
Ifnk	AAACCTGACACACA
Ifnk	ACACACAGGGACTG
Ifnk	AGGTGACCCATCCC
Ifnk	AGTCCCTGTGTGTC
Ifnk	CCCCAGTGTTGGTT
Ifnk	CGCTGAAGATATAC
Ifnk	GCGCCTGGAGGCAA
Ifnk	GGGATGGGTCACCT
Ift74	AATGAGTTGGGAAA
Ift74	ACGCTCCTCGTGAT
Ift74	CCCACTTTAAGTAC
Ift74	CTGAGGCGCAGCGC
Ift74	GCAGGCCAATCACG
Ift74	GCGTATCCTAGCAA
Ift74	GTGTGCAATGAGTT
Ift74	TAAGAGAAGAGTAA
Igfbpl1	CAGCGCTCAATCGG
Igfbpl1	CAGCGTGGTCCAAA
Igfbpl1	cggcccgcaccgcg
Igfbpl1	CTCCGATTGAGCGC
Igfbpl1	CTGCGCGGCCCTAC
Igfbpl1	GCAGCGCTGGTccc
Igfbpl1	TAAGGCGTCCTGGT
Igfbpl1	TGGCAGAGCTGTTC
Il11ra2	AGAAATGGAAGTTC
Il11ra2	AGCTCCCTATCTGC
Il11ra2	ATATTCCCAACATG
Il11ra2	ATCACCCGCAGATA
Il11ra2	ATCTGCGGGTGATG
Il11ra2	CTGGGGCTTCCTTA
Il11ra2	GGAGCTGACATGAT
Il11ra2	TATGGGGGACATTT
Il33	AACTGTGAAGGTGA
Il33	agccctggaggcta
Il33	CAGAGGAGGAGAAC
Il33	CAGGTGTCAACAGA
Il33	CTGGGACATGACGA
Il33	GATAACAGTAACAT
Il33	GGACATGACGATGG
Il33	GGGAGGCAGGATCG
Insl6	AAGATTGCCTGCGA
Insl6	AGAACACTTTGGTT
Insl6	CTTACATGGACTTC
Insl6	GGGCAACCCGAGGG
Insl6	GTGGTGGGTGGCGA
Insl6	TAACCAAAGTGTTC
Insl6	TCCGCACCGCCCTC
Insl6	TTGCCTGCGAGGGA
Izumo3	AAATTAAAATAACA
Izumo3	AAGAGTGAACAGAT
Izumo3	ACACAGTAATAACT
Izumo3	AGAGACATGGATGA
Izumo3	CATACTTAACATCT
Izumo3	CATTCAAATATTCT
Izumo3	GCTAATCATATTTA
Izumo3	TAGATGTTAAGTAT
Jak2	AAGCTGCACCGCGC
Jak2	CAGCTTCGGGAAAG
Jak2	ccgccAACCCCCGC
Jak2	CGGCCCCTGGAGGG
Jak2	GCGCGGTGCAGCTT
Jak2	GCGGCCCCGAGCGG
Jak2	gggctgggccggga
Jak2	TGCTCGGCGGGCTC
Kank1	AGCCACCGAGTGCA
Kank1	ATCTAGTGTAACTG
Kank1	CAGGGCGAATGGGA
Kank1	GAGGGTCGCTCGGG
Kank1	GCAAGAGTAACTTG
Kank1	GCAGGGACACAAAC
Kank1	TAGGAGAGTCGCGG
Kank1	TGGGAGGGTCGCTC
Kcnv2	CCCCTCTGACGTGG
Kcnv2	CTAAGAACTTCCCC
Kcnv2	CTCCACGTCAGAGG
Kcnv2	GATTTTATCTCACT
Kcnv2	GGAGGGTGATTATG
Kcnv2	GTTAGGAGGGATTT
Kcnv2	TCAGCCTTGCCCTG
Kcnv2	TGGGGAAGTTCTTA
Kdm4c	ACTAGGTTCCCACA
Kdm4c	AGAGGCGGAAGTCT
Kdm4c	CAGCGGTCACGTGG
Kdm4c	CCCACGTGACCGCT
Kdm4c	CCTCGGTGCAAGAA
Kdm4c	CTCGGCTTCAAGTC
Kdm4c	GCCGGGCGCTCTCT
Kdm4c	TCTAAACTGCTTAA
Kif24	AGGCGGTCCTCGAA
Kif24	CGGAAGAATCCCAG
Kif24	CGGGCTCTTCTGAT
Kif24_Nudt2	AAACCACGCCTCAG
Kif24_Nudt2	AGCTGAACCATTGG
Kif24_Nudt2	GATGCCCAATTCTG
Kif24_Nudt2	GCAGCACCGACCAA
Kif24_Nudt2	TCAAGCTGAACCAT
Klhl9	AATGGACCCTGCAC
Klhl9	CCGCTCCTAGCCCG
Klhl9	GCGAGGCCGGTGCA
Klhl9	gcgggcgggactgg
Klhl9	ggggcggtggatgg
Klhl9	TGCACCGGCCTCGC
Klhl9	TTATGTAAGCTTGT
Klhl9	TTTCGTTGCTGCTC
Lingo2	AAAGCCTTCACCGG
Lingo2	AGCCTACCCATTCT
Lingo2	CAGGGCGGGGAGAT
Lingo2	GAGCCCTTCTTCGG
Lingo2	GGAAGGGTGGTGAT
Lingo2	GGAGACTCGAGACA
Lingo2	GGGAGGTGACAAAT
Lingo2	GGGGTTCCCAGAAT
Lrrc19	AAACAAGTGATTAA
Lrrc19	atgatgtctgtgca
Lrrc19	ATTGAGAGTATTTT
Lrrc19	GATTAAAGGCAAGC
Lrrc19	GTTTACGAGTTCAA
Lrrc19	TACtgtctaagtta
Lrrc19	TACTTAAAAAGTCA
Lrrc19	TCAATCTTTTGCTA
Lurap1l	CAGGGGACTTCAGC
Lurap1l	GGAACACAATGACT
Lurap1l	GGTTGGCTCTGCTT
Lurap1l	GTCACAGACAAGAA
Lurap1l	TACGGTACAGGGGT
Lurap1l	TAGTAACCTAATAT
Lurap1l	TGAGACCGACTAAA
Lurap1l	TTTAGGAAAGTTGG
Melk	actgggcggagcga
Melk	agcgatggtggggc
Melk	CAGTCCCAGGgagg
Melk	GAGGCGGGGCCCAA
Melk	GATGTCAAATGCTC
Melk	gcggagcgatggtg
Melk	GGAGCCCAGTCCCA
Melk	gggcggggcgagat
Mlana	AACAGAGCCCTTGA
Mlana	aagagcccagagcc
Mlana	AAGTGTTGGTTTTG
Mlana	CTGGGGCAAAGTGT
Mlana	ctgtgtctccttga
Mlana	GCACAAGCCATCAA
Mlana	ttgtagtagtcaaa
Mlana	TTTTGGATTCCTAA
Mllt3	AACAGGTTCCTGAT
Mllt3	AGGCGGCCGCTGAT
Mllt3	AGGGGGCCCGGCAC
Mllt3	CAGCCGCAGGAGAA
Mllt3	CCCCGAAACCCCGG
Mllt3	CCGCCGGGGTTTCG
Mllt3	GAGCGACCGAGCCA
Mllt3	GAGGCGTTCCAGTG
Mob3b	ACTCCGCTCTGAGC
Mob3b	AGGCAGCTACGCGG
Mob3b	CCACTGCAACTCAC
Mob3b	CTTGTGGAGATTAG
Mob3b	GCGGAGTCCCCTGG
Mob3b	GCTGGGTGCATGTG
Mob3b	GTCCTGTTGCCCTT
Mob3b	TTAGAGGATCCTAA
Mpdz	ACGGACAAGCGCGA
Mpdz	AGGCGGCGGGGCGT
Mpdz	CGAGATGGAACGAC
Mpdz	GACAAGCGCGAAGG
Mpdz	GCCCGCGTGGGTGA
Mpdz	GCCGCGCCCCTGAT
Mpdz	GCGCGAAGGCGGCG
Mpdz	GCGCTGGCCAATCA
Msmp	AGGTGGCCGTGGAA
Msmp	CAGCGCCCCTTCCA
Msmp	CGTGGAAGGGGCGC
Msmp	CTCCGGTCCAGGCA
Msmp	CTGCCTGGACCGGA
Msmp	CTGCTGGTGGTGGA
Msmp	GAAATGCCTCCCTC
Msmp	GAGGAGAGCTGGAC
Mtap	AAAACTCTGCAAGA
Mtap	AAGCACATCCTAAG
Mtap	AGGGCTGTAAAATC
Mtap	CTCCCGGGGAGCGC
Mtap	GCAAGAGGGACGGG
Mtap	GTGCGGGGACCCAC
Mtap	TCTTGCAGAGTTTT
Mtap	TGATTTGAGGAGGA
Ndufb6	CCGCCCCCAGAGGC
Ndufb6	GAGGCGCCTGGAAG
Ndufb6	GCAAAGCCCTCTCT
Ndufb6	GGACCGGAAGAACA
Ndufb6	GGCCGACTCCTTCG
Ndufb6	GTAGGGGAGGGGAC
Ndufb6	GTTAAGAACTAAGT
Ndufb6	TGTGAGAAGTCCTG
Nfib	AGCGGCACCGGCAG
Nfib	CACAGCCCACGGAA
Nfib	CAGGAGCGCAGCAA
Nfib	GAGAGGGCCgggtg
Nfib	GAGCGGGGTCCAGA
Nfib	GAGTCCACGCGCGG
Nfib	GCGCGCGCAGGAGA
Nfib	GGCGCGGAGCTCCC
Nfx1	CACGCAGGCGACGA
Nfx1	CTGTAGTAATCAAA
Nfx1	GCAAGCGGGGTTTG
Nfx1	GCAGGCGACGAGGG
Nfx1	GCGGGGTTTGCGGG
Nfx1	GGGAGGCTGGATCG
Nfx1	GGGGACAGCCAAGG
Nfx1	GGTCCTGAAGTCGT
Nol6	ACGCCGCACTAAAC
Nol6	AGGCTGTAAATCGG
Nol6	CAATGGAACTGCAG
Nol6	CACTGCAGTTCCAT
Nol6	CTACGGGGTAGATC
Nol6	CTCCCTTCCCGAAA
Nol6	GTCCCAAACGCTTC
Nol6	TCGAGGCTGTAAAT
Npr2	AAGGACTGGGACAT
Npr2	AGAGCCCCGGGCTG
Npr2	AGGAATCTGAGCCT
Npr2	CCTCACAGCTGATC
Npr2	cgggAGAAGCGGAG
Npr2	GAGGCGACCTGACC
Npr2	GCCGCAGCTCCGGA
Npr2	GCCGCGGAAGGACT
Nudt2	CTGTGAATGACCAT
Nudt2	GAATGACCATTGGT
Nudt2	gcgcgcgTTCGAAC
Olfr71	aaggtggaTGATTC
Olfr71	AAGTACAGTCGTTT
Olfr71	aggagtctgtccca
Olfr71	CTCTCATTCAGCGT
Olfr71	ctgaagcctacaga
Olfr71	gagtgtggccaagc
Olfr71	GCATGGGACCACAG
Olfr71	TGCAGGTCGTGCAT
Pax5	CAAGAACCAGGGAA
Pax5	CAGCGTGCCAGACG
Pax5	CCGTCTGGCACGCT
Pax5	CGAAGGTGTGCAAG
Pax5	CGGGCCAAGAACCA
Pax5	GCGCGACGTGTCTG
Pax5	GGGGCGGTGCGCCG
Pax5	TGGTCCGCCCCGTC
Pdcd1lg2	AGGGGTACAGCTAA
Pdcd1lg2	CAAAGTATGCTTCC
Pdcd1lg2	CATTCAAACCAGAA
Pdcd1lg2	CTGGAAGCATACTT
Pdcd1lg2	GAACAATGGCTCTA
Pdcd1lg2	GCCATGGAGAAGTT
Pdcd1lg2	GCCTGGCAGGTAAG
Pdcd1lg2	ggagcttgtgataa
Pigo	AAGGTCTAAGAGAG
Pigo	ATGGACAGTGAGTC
Pigo	CAGAGCGCCCTACC
Pigo	CGACAAGAAACGTG
Pigo	CTGAAAACTTTGAT
Pigo	GCTCGGTGGTCCCT
Pigo	GGCGACAAATCTCC
Pigo	TGCCGCTGCACTTC
Plaa	AGGAAATTCTGCGT
Plaa	CAGAGTGTGTGCGT
Plaa	CGGACCCAGACCTC
Plaa	CGGCGTGTGTGTTA
Plaa	CGGTCCTTCCGCAC
Plaa	GCGCAGAAGGATAG
Plaa	GCGCCCTGGATCGC
Plaa	TCGCCGGCCGAAGA
Plgrkt	AAGGCCACGCTGAT
Plgrkt	ACCCCAGGCCTCCG
Plgrkt	ACCCGAGCGCTTAA
Plgrkt	CAGGCGCCTGGAGC
Plgrkt	CGGAAGAACACCCC
Plgrkt	GCCCGCGGAGGCCT
Plgrkt	GTGCGTGATTTTGA
Plgrkt	TGGAGCCGGGAGGT
Plin2	AGAAGGCCTCGCCC
Plin2	ATCACGTGGCTCGG
Plin2	CTCATTGGGGATGA
Plin2	GCTGAACCCTGTGC
Plin2	GGACTGGGACTCTG
Plin2	GGGGCCACTCATTG
Plin2	TCAGGAAACCAAGG
Plin2	TGGTGCCACAATAT
Polr1e	ACGCGATCCAGTGA
Polr1e	ATCCTCCTGCAAGG
Polr1e	cagcttagagcctg
Polr1e	CCCCGCCCACTCTT
Polr1e	CTCCCCCTTGCAGG
Polr1e	GGTGTGATCCTCAA
Polr1e	GTCCGAGACGAAAG
Polr1e	tgaagctgctctcc
Prss3	AAATATAGAAGTTG
Prss3	AGGCCACACATTTC
Prss3	ATTCTGGTAGCTAT
Prss3	GGTTCAAACATGGA
Prss3	GTTCCTGAAATGTG
Prss3	GTTGAGGAGCTCTA
Prss3	TAGAATCTTTTTGT
Prss3	TGAGATTTAAGTGC
Psip1	CAGATGCCGTGGGA
Psip1	CCAGGGGCACCTGT
Psip1	GAGCGTCGTGGCTC
Psip1	GCCGCCGAGCGTCG
Psip1	GCCGTGGGAGGGGA
Psip1	GGAGAGAGGCACGC
Psip1	GGAGGCCCGGAGAG
Psip1	GGCTCGGGAGCTGA
Ptprd	ACGGGAGAGGCGGA
Ptprd	AGGCGAGACGCGGC
Ptprd	CCGGCGCGCTGCTG
Ptprd	gcagcgtggaggag
Ptprd	GCCCGCTGGGGTGA
Ptprd	GCGCGCGGCTGCTC
Ptprd	GGAGAGGCGGAGGG
Ptprd	ggagcgtggaacag
Ranbp6	AGGAGCACATCGGT
Ranbp6	ATCGGTCGGAGAAC
Ranbp6	CCCACTCTCCGCTG
Ranbp6	CGGCGGGGTGAAGC
Ranbp6	CGGTGACGTCAGTG
Ranbp6	ctgctatggagtga
Ranbp6	TGAGTGCGTTTTAG
Ranbp6	TGGGTTTTACAGGG
Rcl1	ACAGCGCAGACCAA
Rcl1	CCAGCAACAGCGCG
Rcl1	CCCAGATCCCTCGT
Rcl1	CTGCGGGGAAACCC
Rcl1	GCCCCAGCCAGGGG
Rcl1	GCGCTGTAGCTGGG
Rcl1	GTAGTGAAAGAGGG
Rcl1	TGGCGACGCAGAGA
Reck	AAACGGGAAGTCAG
Reck	AAAGCTGAACTGTA
Reck	CGCGCCCTGGACCC
Reck	GAGCCCGAGTCCGA
Reck	GAGGCATTCCACAG
Reck	TCGGGGCACATAGG
Reck	TGCCGCCCCCCGGG
Reck	TGCGGTCTTCAAAC
Rfx3	AGAGCTGGCGGCAG
Rfx3	AGCGCCGGAAGAAG
Rfx3	CTGCCTGGAGGAAC
Rfx3	GAAAGCTGAGGGTC
Rfx3	GACGGAGGACGCCG
Rfx3	GCTCGGAGCCCGGG
Rfx3	GGGCACAGAGCTGG
Rfx3	gggCCCGAGAGCGC
Rgp1	CACCTTCCCAGCGG
Rgp1	CCAGGGCTGGGTAC
Rgp1	CCGCGCCCACGCTC
Rgp1	GAGCGTGGGCGCGG
Rgp1	GATCCGGTGGTCCC
Rgp1	GCGGGTCCCAGAGG
Rgp1	GGAAAGGGATCCGG
Rgp1	GGGCCGAAGGTCGC
Rln1	ACATAACGGGAGGA
Rln1	ACCACGCAGGCTGA
Rln1	AGACAATACCACGC
Rln1	ATAAGGTTGTTTGG
Rln1	CTGAGAGCTCCCAA
Rln1	TGAAAGGTGGGTAA
Rln1	TGATGAATGAAAGG
Rln1	TGTGACTTAGTCCA
Rnf38	CAGCAGACGGGGCA
Rnf38	CAGCTCTCCTTCAT
Rnf38	CCAATAGTGAGCTG
Rnf38	CGCTCGGCTTGCTC
Rnf38	GAACAAGCCTATGA
Rnf38	GAGCGAGTGAGCTT
Rnf38	GCGTCTCCCAACGC
Rnf38	GGATGGCCAGGTAG
Rnf38	GGGCGGCGAAGGTG
Rnf38	GGGCGGGGCTGCGC
Rnf38	GTCGTCCTGAGGGT
Rnf38	TAGAGGTGCTGAAT
Rnf38	TATCTGGGAAAAAG
Rnf38	TCAGCTCACTATTG
Rnf38	TGCTGAATTGGCCC
Rnf38	TGGCCATACTGACA
Rpp25l	ACCCGGGAAAGGAA
Rpp25l	CAGAGGGCCCACCC
Rpp25l	CCGCTACCTGCAGA
Rpp25l	CCTGAGAGAAACCC
Rpp25l	GATGCCACCATCAC
Rpp25l	GGAACGGCTATCGG
Rpp25l	GGCCCACCCGGGAA
Rpp25l	TCGTCCAGTGTCCC
Rps6	AGCCGCTTCCAGAC
Rps6	CACCAGGAAGGTCC
Rps6	CAGACCCCGTCACC
Rps6	CAGGGCGACAATTC
Rps6	CCCCGTCACCAGGA
Rps6	GGGGCGTTACTTCC
Rps6	TTCCGCTTAACCCA
Rps6	TTCCTGGACCTTCC
Rraga	CAAAACCCCAGCGT
Rraga	CATCGCGAGAACGT
Rraga	CGAGTTAAAATGAA
Rraga	CGCGAGAACTCCGA
Rraga	GAGTGAACCTGGGA
Rraga	GCGAGCCCACGCTG
Rraga	GCGCTAGATTGCAA
Rraga	GGGTCGAGTGAACC
Rusc2	CAGGTCGGTCCCTT
Rusc2	CGAAGGGACCGACC
Rusc2	CTAAGGGGAGGGAT
Rusc2	GACCTGGAACTGAG
Rusc2	GGCCTGTTAGTCTG
Rusc2	TCCCCCAGACTAAC
Rusc2	TGCTACTAAGGGGA
Rusc2	TGTTAGTCTGGGGG
Sh3gl2	ACGGTCCGAAGCCT
Sh3gl2	CAGGGCGCAAGCCG
Sh3gl2	CCCGCACAGTGCGG
Sh3gl2	CCCGCACTGTGCGG
Sh3gl2	GCGCAAGCCGAGGC
Sh3gl2	GCGCTCACCTGCCT
Sh3gl2	TCTTAAAGGGGACG
Sh3gl2	TGATCCCTTTGCCA
Shb	CAGTCCCTGCTGGA
Shb	CGTGGCATTGGCGG
Shb	GCGCCCGCGTCCTG
Shb	GCGGCCGCAGGAGG
Shb	GCGTGTGTGACACT
Shb	GGGCGCCAGCTCCG
Shb	GGGCGCCCTAGGGC
Shb	GTGCAGTCGTGAGG
Sigmar1	AGCGTAGGGTTTAG
Sigmar1	CAATCGGAACGTCC
Sigmar1	CCGCCACCGTGGTA
Sigmar1	CCGTACCACGGTGG
Sigmar1	GAGGGGAGAGCGTA
Sigmar1	GCTGCCACCCTGTT
Sigmar1	GGGCCAATCCATTC
Sigmar1	GTTGGGTTCAATCT
Sit1	AATTCCGTGGCTAA
Sit1	ACTCCCTGCTCAAG
Sit1	ATTTCCACCGGTAG
Sit1	CATTGCCATGAAGG
Sit1	CTTCAGAGTCTCCG
Sit1	GACTCAGAGACACG
Sit1	GAGTCCCCTTGAGC
Sit1	GCAGGCACAGGGCG
Slc1a1	ACCAGCGAGACGGA
Slc1a1	ACCGGGAGCCCAAG
Slc1a1	AGAAGCTCCTCGGT
Slc1a1	GATCAAGTCCCCTT
Slc1a1	GGGATGGTGCGCGT
Slc1a1	GGTGAGGATCGTAG
Slc1a1	GTCCCCAAGGAGAC
Slc1a1	TAGCCCAGTGCGAA
Slc24a2	AACTAGAGAGGAGG
Slc24a2	AGGCAAGGGCACAA
Slc24a2	CCCGGTCCCCACTG
Slc24a2	CCGCGCCGCCGAGA
Slc24a2	GCCGCCGAGAGGGA
Slc24a2	GTGCCAGCAGGCAA
Slc24a2	GTGGCCCGCGCAGG
Slc24a2	TCGGGAAGCAGGTA
Slc25a51	ACAAGAGTCAGTAC
Slc25a51	AGTCAGTACCGGAC
Slc25a51	CCGGACGCAGTACA
Slc25a51	CTGAAGTTATACGG
Slc25a51	GAAAGCTTCTGATG
Slc25a51	GCTATCTACAGCCC
Slc25a51	GGCGGGGAGACTAG
Slc25a51	GGGCCCTGGTCACG
Smarca2	AGGAGCGGCTCGCG
Smarca2	CCGAGTTTAGGAAG
Smarca2	CGCGGGGCCAACTG
Smarca2	GCCTCCACGGGCGC
Smarca2	GCGGGGGGAGCAGG
Smarca2	GGTGTGCAAGAATG
Smarca2	GTTTAGGAAGAGGA
Smarca2	TCCGGCGCCCGTGG
Smu1	ACGCCCAGGTGGGC
Smu1	ATGCCATACCAGTA
Smu1	CCGCGCGACACTTC
Smu1	CTACGAATGCCCAT
Smu1	CTTCCGCTCCGTTA
Smu1	GAACACGCCCAGGT
Smu1	GCCTCGCGAAAGCG
Smu1	GCGAACGTACACAC
Snapc3	CCATAGCTCCCCAA
Snapc3	CGAGAGGGCGTCGC
Snapc3	CGGTCGCTGTGGGC
Snapc3	CGTGGCTGACATGG
Snapc3	CTGGACTTGTCCGA
Snapc3	GAGCCGCGCCCAGG
Snapc3	GCGGAGGACCTGCA
Snapc3	GGCTCGGTCGCTGT
Spag8	CAACCGGAGCTGGG
Spag8	CACTTGGGCTTTTA
Spag8	CTCTCCAATAGCCC
Spag8	CTGGGCGGACCCGA
Spag8	GCCCCGGCTCCAAT
Spag8	GGAAGTCTTAGACT
Spag8	GGCGGACCCGAGGG
Spag8	TAATCAATCAAGTT
Spata31	AATGTTGGAGTAGG
Spata31	ACTCATATATTACC
Spata31	ccacataacgaact
Spata31	cctagttcgttatg
Spata31	GGGCTTCTGAGAGT
Spata31	TCCTTCAGCCTTCT
Spata31	tgagattataagac
Spata31	TGGAAGCACCCAGA
Spink4	AAGCAAAAAGGGTT
Spink4	AGAGCAAGCAAAAA
Spink4	AGGGGATGAAAGTA
Spink4	ATGAAGAGATTAAC
Spink4	CCAGCTCTGCCCTA
Spink4	CCTTCCCAGGTGTC
Spink4	CTAGGGCAGAGCTG
Spink4	GGGAGCCCTAGGAT
Stoml2	CGACTAGTGGGGAT
Stoml2	GACGCCGACTAGTG
Stoml2	GCCGGAAGTACGTC
Stoml2	GGAAGTACGTCGGG
Stoml2	GTGCAAGTTTGTTC
Stoml2	GTGGACTAATACGC
Stoml2	TAGTGGGGATGGGA
Stoml2	TGAGTCACGGCTGT
Taf1	ATCAAACACATCAA
Taf1	CATCCCGACATCAA
Taf1	CCTGACCCAACCAG
Taf1	CTCTGGTTGGGTCA
Taf1	GCCCAAGATCAGGC
Taf1	GCGCAGTTGATGGG
Taf1	GCGCGGGTCCGTTC
Taf1	TCAAAGGATCACGT
Tek	AAGCCTTGGATGAA
Tek	AGGCTGTATCTTAA
Tek	AGGGCAAGATGGAT
Tek	CATACATAGGTGGA
Tek	GCTCCTGCCTTAAC
Tek	GGGTATCCTCTCAT
Tek	TTAACTGGATTGTG
Tek	TTGCCCTTCATCCA
Tesk1	CAGGAGACCTCTGC
Tesk1	CTGCCACCTCGCGG
Tesk1	CTGGATCCCGGCAG
Tesk1	GCCAATCGTCGCTA
Tesk1	GCGGAATGGAGTGA
Tesk1	TAAGGGAATCGTTC
Tesk1	TGGCAGGACGCTCA
Tesk1	TTGCGTGACGTCAC
Tln1	TTCCTGCTGGGGAG
Tmem215	CAAGTGATGTAAGG
Tmem215	CAGCGGATCGGAGT
Tmem215	ctGTGCAGTGTCGG
Tmem215	GCGCGCGGCGCTGC
Tmem215	GGAGGACTCCGTCC
Tmem215	GTGCAAGTGATGTA
Tmem215	TAGAAGCGGAGCCT
Tmem215	TGGGCGCAGCGGAT
Tmem8b	AGACAGAGGCTCTA
Tmem8b	AGAGGCTCTAAGGT
Tmem8b	CAGGCTTCAGTTAG
Tmem8b	GATGTGGACCTGAG
Tmem8b	GTAGGCAGCGCAGC
Tomm5	AGACCTGAAGGGGG
Tomm5	agcaacactatcca
Tomm5	CAAAGAGACCTGAA
Tomm5	CACTCTCCCGGCTA
Tomm5	CGGGAACCTGTGAG
Tomm5	GAGACTTAAGGCGG
Tomm5	TCAGAGACTTAAGG
Tomm5	TCCAGATCCACCCA
Topors	AAAGCGTGTCCTCC
Topors	ACAGGGAAAGGACC
Topors	ACCCCTGACGTCAG
Topors	AGCTACAGGTGGAA
Topors	CTGCACTGTGTTAG
Topors	GCTCGGGCTACACA
Topors	GGCTACACAGGGAA
Topors	GTAGCTGCTTGCTC
Tpm2	AGGGGGCGGACCCG
Tpm2	AGGGGTGGGCGCAA
Tpm2	CCCGGGGCTATTTC
Tpm2	GCCCAAGGGTCTTG
Tpm2	GCGTGCCCTCCCCT
Tpm2	GCTAGCCGAGGGGA
Tpm2	GGGCTGGGACCCGA
Tpm2	GGGTCCGCCCCCTC
Trmt10b	AAACAGGTGACTAG
Trmt10b	AAAGACAAAGTAGG
Trmt10b	ATGTAAGGTTTACG
Trmt10b	CAAAAAGACAAAGT
Trmt10b	GGCAAAGAGTCTAG
Trmt10b	GGGCTTCTATACTC
Trmt10b	TCCCTGCTGGTTGA
Trmt10b	TGATACCAGTAGAT
Trpd52l3	ACTTCCGGCCCAAA
Trpd52l3	ACTTCCGGGTGGTA
Trpd52l3	CTACCACCCGGAAG
Trpd52l3	GCCAGGAAGACGGG
Trpd52l3	GGCGCCAGACAATT
Trpd52l3	TATGGGAGTGTTTC
Trpd52l3	TTACGGATCTCCAC
Trpd52l3	TTGGAACATAGGCC
Ttc39b	AACCAGGTTCCGTG
Ttc39b	ACCCAGTACCCCAG
Ttc39b	CTCCCCACGGAACC
Ttc39b	CTGCCAATCCTCTA
Ttc39b	GCAGCCACGACCTT
Ttc39b	GGATAGCCCCGCCC
Ttc39b	GGCCAGTACCCCAG
Ttc39b	GGGTGCTCGGGAAA
Tusc1	AGACCGGACCGATG
Tusc1	CACCGCTTCCCCGC
Tusc1	CAGAGCGCTCCCCA
Tusc1	CCGCGGGGAAGCGG
Tusc1	CGGGCACGGACACA
Tusc1	GGGCCTGCGGTCGC
Tusc1	GGGCGGAGGAAGAA
Tusc1	GGGCGTCGTGTGTG
Tyrp1	ACAAGGAAACCAGT
Tyrp1	CAGTGTGAGGAATC
Tyrp1	GAGGAATCTGGCTT
Tyrp1	GCCCTTTAACTACT
Tyrp1	GCCTAGTAGTTAAA
Tyrp1	GGGCAATTAACAGC
Tyrp1	TGGGATTTACTGTC
Tyrp1	TTACATTTGAATGT
Ubap1	AAGAGGCGCGGCCA
Ubap1	AGACTCGGGATAAG
Ubap1	AGAGGGTAAGACTC
Ubap1	CCGCCCCGACCAAT
Ubap1	CTGCGGACCCTAAG
Ubap1	GAACCCTTCAGCTC
Ubap1	GGGCGGAGCGTCGA
Ubap1	TCCTCCCATTGGTC
Ubap2	AGTGGGTTCTCTAT
Ubap2	CTACGTCACGGGAG
Ubap2	CTATGTGGAGGCGG
Ubap2	GAGGAACTATGTGG
Ubap2	GCACGCTTTAATAG
Ubap2	GGCTAACACAGCTC
Ubap2	GGGTTCTCTATAGG
Ubap2	GGTGACATTGCTTG
Ube2r2	cgcGGAGAACGAGA
Ube2r2	ctggggtctcggga
Ube2r2	GAGGTGGGGATCAA
Ube2r2	GCCAAGCGGAGGTG
Ube2r2	GCGCAGCCACCGTG
Ube2r2	GCTCGCGGCGACAG
Ube2r2	gggcgcacgaggga
Ube2r2	GTGGGGCCTGGCCG
Uhrf2	ACCAACGACAACGA
Uhrf2	CCAGAGCCGTTACT
Uhrf2	CCGAGTAACGGCTC
Uhrf2	GAGCCGTTACTCGG
Uhrf2	GGCGCTAATATGGG
Uhrf2	GGGCAGGCTCGCCG
Uhrf2	GGGGGGCGCTAATA
Uhrf2	GTGAGCAAGAAATG
Unc13b	ACGTGCTCCCGGGG
Unc13b	CCCAGCCGGAGTGA
Unc13b	CCGGAGTGAGGGGA
Unc13b	GAACCAATCCCCAA
Unc13b	GCACGTAGACTTCG
Unc13b	GGGCGCGAGCGGAT
Unc13b	TAGCCCTTGGGGAT
Unc13b	TCCGCCCACTGAAA
Vcp	ACGAGTCCCAAGGC
Vcp	CTCCCTATCCGTCG
Vcp	GAAGCGTAGTGCTG
Vcp	GAGGCCTCCTCCGA
Vcp	GCGGCCAATTGACG
Vcp	GGAGAGGCACGGAG
Vcp	GGATAAAGAGGATA
Vcp	TTCCTCGACGGATA
Vldlr	ACCGCGGCCGCGGC
Vldlr	GCGCACAGCTGCTG
Vldlr	GCGCGCAGTGAGGA
Vldlr	ggagggaacggcgc
Vldlr	ggagggaggagacg
Vldlr	GGGGACCCCAGCGG
Vldlr	GTGTGCAAGTTGCA
Vldlr	TGAGCCCCTAGGAA
Zbtb5	AATGGCCAATCATC
Zbtb5	ACAGCCGGGGTCCT
Zbtb5	AGGCCTACAGTAAA
Zbtb5	AGTAAACGGATGTG
Zbtb5	GAGGCCTGTGGAGG
Zbtb5	GGAGGCGGTGACAT
Zbtb5	TCATCAGGAGGGCG
Zbtb5	TGATGATTGGCCAT
Zcchc7	ACAAAGTTTATAGG
Zcchc7	AGAAGGTACTTCCG
Zcchc7	AGGACTCGCGGGTT
Zcchc7	CCGCGCGGACTCCA
Zcchc7	CTCGGAGGACTCGC
Zcchc7	GCGGAGAAAACAAA
Zcchc7	GGACAAATGAGGTA
Zcchc7	GGCGAGGACAAATG
Zdhhc21	CGGCCGCCTGGGCA
Zdhhc21	GCGAGCACTGCTTA
Zdhhc21	GCGCGAAGCGGAGA
Zdhhc21	GGGCGGGGAGGCAC
Zdhhc21	GGGGAGGCACAGGT
Zdhhc21	GGTAGGTTAGACGA
Zdhhc21	GGTTAGACGAAGGT
Zdhhc21	GTGTGCGGCCGCCT

## Sheet: Chr10p gRNAs
Mouse Homolog	gRNA Sequences
4921504E06Rik	CCGGAGACCggggt				Total gRNAs	1293
4921504E06Rik	GCCTGGCGAGACAG
4921504E06Rik	GCTTATGTCTGGTG
4921504E06Rik	gggcggagagcggg
4921504E06Rik	gtgaggtgtagggC
4921504E06Rik	GTGGGCGTCCGAGA
4921504E06Rik	gtgggtgaggtgta
4921504E06Rik	TCCTCTGTCTCGCC
Abi1	AAGCATTGCTATAG
Abi1	CGCGCATGCGTCTA
Abi1	CGGCTGTGCGTCCT
Abi1	CTATAGTGGATGGG
Abi1	GGGTGGTTGGCGTC
Abi1	TCCCGTTGTCATGG
Abi1	TTGCTATAGTGGAT
Abi1	TTGTAGTTTCTTCC
Acbd5	AGGCGCTCCGGCTG
Acbd5	CAGGGGCCACCTTT
Acbd5	CCACCTTTAGGACC
Acbd5	CCTCGGGGTTAAAC
Acbd5	GAGGAGGGGAAAAG
Acbd5	GCGGTGAAGTACTA
Acbd5	GCGGTGACGTGCAC
Acbd5	GGTTAAACCGGAGA
Acbd7	ACCGCTACACCCAG
Acbd7	AGCTCCGAGACACT
Acbd7	atcggccatccctg
Acbd7	ATTGGCCACAGGAG
Acbd7	cgatagcgtctctc
Acbd7	GAGGTAGAATGGAG
Acbd7	GGGAGGGAGTGTCT
Acbd7	TCAGCCCAGTGTCT
Adarb2	AGAGGCGGTAGAGC
Adarb2	AGCTCTACCGCCTC
Adarb2	CCATCCAACCGAAT
Adarb2	CCCAGGAGAAAGGA
Adarb2	GAACTGGTTTTACT
Adarb2	GAGGGTGACTACCT
Adarb2	GGAGAAGTCCAGCG
Adarb2	GGGCAGTTTGCAGG
Adk	AGGGCAAGGGGAGG
Adk	CCCCCAGGGCAATA
Adk	CGGGCAGCGAGCCT
Adk	CTACAGCGGACCGA
Adk	gcgcggggTGTGTA
Adk	GCTGGGGCTCGGTC
Adk	GGGAGGGCAAGGGG
Adk	TAGCGCCGCCCCCA
Akr1c14	AAACAATGGCATGT
Akr1c14	AGAAACATTGTGTC
Akr1c14	CAGCAATCAATCAC
Akr1c14	CAGCTACTGGGCTC
Akr1c14	CCAGTTTTTGTCTC
Akr1c14	GGAAAGTTAAACAA
Akr1c14	GTGTAAATTGTTAA
Akr1c14	TGAAGTTACTTTCT
Akr1c18	CAATGGCACGGGGG
Akr1c18	GACAATGTCTAGAG
Akr1c18	GAGAACAGAACAAT
Akr1c18	GAGAATAAACGGTC
Akr1c18	GAGTGGAAAGTTTG
Akr1c18	GCAGTCAATGGCAC
Akr1c18	GCATTCTACTTGTG
Akr1c18	GCGATCGCCAATTT
Akr1c20	actgatgataatgg
Akr1c20	AGAACAGAAGGGTG
Akr1c20	ATAATTAAAAAGCT
Akr1c20	CTGTCAAACTGCCT
Akr1c20	ggctagtactccag
Akr1c20	TATAGACACAAGAT
Akr1c20	tggaggtcagaaaa
Akr1c20	TTCTTGAAAAGTTg
Akr1c21	aagaactgaacaaa
Akr1c21	aatggaagagagac
Akr1c21	acaattatacatat
Akr1c21	ATCTGTGTCACGTG
Akr1c21	ATTATATAATAGCC
Akr1c21	gagaggaagtagga
Akr1c21	ggatggatctgagt
Akr1c21	TAACTTAAGCTAAC
Akr1c6	agacacgataggca
Akr1c6	ATCCATGAAAGTTg
Akr1c6	ATGAAAGTTgggga
Akr1c6	atgactaatgccca
Akr1c6	attgtagacacgat
Akr1c6	CAGCATTTCATAGT
Akr1c6	GAGCAGAGAGCAAG
Akr1c6	tgatgatcaaaccc
Akr1cl	aatatgattggaca
Akr1cl	CATCCTTATTTCCC
Akr1cl	ctctacttgatcat
Akr1cl	CTTCCAGGGAAATA
Akr1cl	GAAGTCTAGGTCAG
Akr1cl	gccctagtggagct
Akr1cl	gctccactagggct
Akr1cl	gctgtttatctatt
Ankrd16	ACGCACCCTCCCAC
Ankrd16	ACGCGTACTCGTCA
Ankrd16	ACTCCGAACTGGAA
Ankrd16	AGAGTCGGGGAAAA
Ankrd16	GAGAATCTGGCTGG
Ankrd16	GCCTCGGGCTCCCA
Ankrd16	GCGTGTGTGATGCG
Ankrd16	TAGCGGAGAGAATC
Ankrd26	AGACCCAGTACTCC
Ankrd26	AGTCCTGGAGTACT
Ankrd26	GCGCTGCAACCTAG
Ankrd26	GCTTCAACAGGAAT
Ankrd26	GGGGTTTAAGGCGG
Ankrd26	GGTTAGCCTCGGTT
Ankrd26	TAACCCGGGGTTTA
Ankrd26	TTTAAGGCGGAGGT
Anxa11	CAACCCTCACCTGT
Anxa11	CACGCCCACAGGTG
Anxa11	CCGCCCATCTCGTG
Anxa11	CCGCTCTAGACCTC
Anxa11	CGGGGCGACAAACG
Anxa11	GAGCCGCACGAGAT
Anxa11	GAGGACATTCTCGC
Anxa11	GTCCTCTCATCCTG
Ap3m1	ACGGAGTTAGGCTG
Ap3m1	AGAGCCAATGGTTA
Ap3m1	AGGGGCTGAAGGAA
Ap3m1	CCAAGGAGGTCGGC
Ap3m1	CGGCGTTCAGTGAG
Ap3m1	CTGAAGGAACGGGG
Ap3m1	GCCAAGGCCCACGT
Ap3m1	GCTTAGTGGAAAGG
Apbb1ip	AAGCCCCGCCTAAA
Apbb1ip	AAGTGTTTTCTTCC
Apbb1ip	AGGACGTGGGCTCA
Apbb1ip	CGAGGCGAGGACGT
Apbb1ip	CTGCGCCGCCGGGT
Apbb1ip	GAGCCCTTTAGGCG
Apbb1ip	GGTTAGTGCTCAAG
Apbb1ip	TTGCGGAGCCCTTT
Arhgap12	AGACGCTTAAGAGG
Arhgap12	AGGGGCGGGACATT
Arhgap12	GAGGGTAAGTTCCA
Arhgap12	GCACGTGACAGAAG
Arhgap12	GCGAGACGCTTAAG
Arhgap12	GGGCAGGCACAAGC
Arhgap12	GTGCGAAGGAATTA
Arhgap12	TTAAGAGGGGGATT
Arhgap21	AGCCAAGCTAGAGG
Arhgap21	CCCCCGGGAGGGGA
Arhgap21	CGCGGGTTAAGGGT
Arhgap21	GCCCAGGTTGTAGG
Arhgap21	gcgAGCTGCTTCCC
Arhgap21	GCGTCCCCCGGGAG
Arhgap21	GGGAGCCAAGCTAG
Arhgap21	GGGCGAGGAGTTTT
Arl5b	ACCGGAAGTGTACA
Arl5b	CGCGCTGACGTCAG
Arl5b	GGACCACCCATCGC
Arl5b	GGGCGCCTGGGACG
Arl5b	GTGGTCCCGGGCGT
Arl5b	GTGTGGCCGATCTG
Arl5b	TCCCTGTACACTTC
Arl5b	TCGGCACGTGACGT
Armc3	AGACGAGGAAGGGA
Armc3	AGCCAATTAACTGA
Armc3	ATTGTGGTTCCTGC
Armc3	CCATGGCACGATTG
Armc3	CTGAAGACGAGGAA
Armc3	GCGGTGTACATCTA
Armc3	GGCTAGGGGGCAGA
Armc3	TGGCAAGTCTAACA
Armc4	CAGCGACTAGAGGC
Armc4	CAGTCTAGGTACTT
Armc4	GCAGCAGCGACTAG
Armc4	GCATATTTTCTCAC
Armc4	GGGCGGGTGTTTAC
Armc4	GTTTTCAAGATGCA
Armc4	TGCCAGCTCAGTCT
Armc4	TGCTGGAAGAATCC
Asb13	CAGGTGGCACGCGG
Asb13	CGGCCTGCGCTCCG
Asb13	CTGTCACTGCTGAA
Asb13	GAGTGGGGACGCTC
Asb13	GGACGTATATTCAC
Asb13	GTGACAGCGGAGTG
Asb13	TGGGGACGCTCAGG
Asb13	TTCAGCAGTGACAG
Atp5c1	GAGGTAAGTGACTC
Atp5c1	GGGCTCCAAGCCGA
Atp5c1	TCCAAGCCGAGGGA
Atp5c1_Kin	CCGCGAGAACATGG
Atp5c1_Kin	GGATGCGGGGGCTC
Atp5c1_Kin	GGCCAGGGAACTCG
Atp5c1_Kin	TCCGCCTGCGTCCT
Atp5c1_Kin	TGGTAGGACCACAT
Bambi	CCAGACGCGGGCTA
Bambi	CCGGCGCCCAGAGT
Bambi	CTGCGACGCATATG
Bambi	GCAGACAAGCCGCC
Bambi	GCAGGCGTTCGCTA
Bambi	GGCAAGTAGCACTG
Bambi	GGGCCCAGCCGCAG
Bambi	TAGCACTGTGGACA
Bend7	AGCTCCACGGGCCC
Bend7	CCGCCGCCATCCCC
Bend7	CGGGCCGCGTCCGC
Bend7	GCCGAGTCCAGCAG
Bend7	gccgcccccttcga
Bend7	gccgcgccgtcgaa
Bend7	GGAAAGTTGGGCTG
Bend7	TCCAGCAGTGGCGG
Bmi1	AAATGCACGGCTGA
Bmi1	ccgagtgtgcttgc
Bmi1	CGACACTAATTCCC
Bmi1	CGCGGAAACAACAg
Bmi1	GCAGGAGACATGGT
Bmi1	gcgctgcgagggga
Bmi1	GGGGAGGTTGGCGA
Bmi1	TCGGGAGAGACAAT
C1ql3	CCCCCTCTCAGCAA
C1ql3	CCCTTGCTGAGAGG
C1ql3	CCGGAGCAATTTAT
C1ql3	CGCTGCCATCGTCT
C1ql3	GCGCAACTGCTCTC
C1ql3	GCTGGTCATACTAG
C1ql3	GGGGAAATAGATTT
C1ql3	GTCTGGGCTAGACA
Cacnb2	AGACAGAAGTCTGC
Cacnb2	AGTGAGAGCCCCAG
Cacnb2	CAGACTTCTGTCTG
Cacnb2	CCCAGAGGGAGAAG
Cacnb2	GCATAGTGGGGTTT
Cacnb2	GCATGCCCAGTGCA
Cacnb2	GCTAGGATTCTCCA
Cacnb2	GTAAACAGCTGGGA
Calm4	AAGAAAAGAGGATG
Calm4	AATCTAGGAAGACT
Calm4	AGATGTCTATGCAG
Calm4	AGCATCATGCCTGA
Calm4	AGCGAGTGCAGTGA
Calm4	CTATAGGTAAATCT
Calm4	CTGGGCAAGAAAAG
Calm4	GCAGTGAAGGCTAT
Calml3	AACCACAGGGGCGG
Calml3	AGCAGCAACCAGGC
Calml3	CAAGAGCAGCAACC
Calml3	CAGACCAACGATGG
Calml3	GCTGCCGGCCCTGC
Calml3	GGTCTGGTAGGATT
Calml3	TCCTCCCCCATCGT
Calml3	TTCAGGCAACCACA
Camk1d	CCGTGCTTGGGCGC
Camk1d	CCTGGGAGCGTGCG
Camk1d	CGGGTGCACTGGGA
Camk1d	GCAGCACTTGACCA
Camk1d	GGACCCAGGGTGCG
Camk1d	GGAGCTCCGTGCTT
Camk1d	GGCCGCCTCGCGGG
Camk1d	TCGCCCGGGGACCC
Ccdc3	ACGGGCGGAGATTG
Ccdc3	CACGGCTAGCTCTT
Ccdc3	CGCCCTGGGACTCC
Ccdc3	CGGGAGTTCTGCAC
Ccdc3	CGTCCCTTCCTCCC
Ccdc3	GCCACGCTTAAAAA
Ccdc3	GCTACAAACCAGTT
Ccdc3	TCCAGGGTGACTAG
Ccdc7	AAGGAGTCAAGTGT
Ccdc7	AAGTGTGGGTGCCA
Ccdc7	AGCTGTAGCTGCTA
Ccdc7	GAGAGacgtaacat
Ccdc7	GCACAAAGAGCTGG
Ccdc7	GGGCGTGGCGCGTG
Ccdc7	TAATATACATGGTG
Ccdc7	tctcagcattcagt
Ccny	ACAACCGTGGCGTG
Ccny	acgcggccaggcgt
Ccny	CGGCAGCCACAAGG
Ccny	GCCTAGCAGAGAGG
Ccny	GCGCACACTGGAGG
Ccny	GCGGATACGCAGAC
Ccny	GCTCCCGCTAACTG
Ccny	GTGGCGTGCGGCTG
Cdc123	AGGCGGACCAGCCT
Cdc123	GCCGGTGTCTCTAG
Cdc123	GCGAGCACAACCGA
Cdc123	GGCGCCTGATTCTA
Cdc123	GGCGGGCTGTACTC
Cdc123_Nudt5	AAGCGTAGATTTTT
Cdc123_Nudt5	AGACTCTAGAGCCA
Cdc123_Nudt5	TTGCGCGTCTGTGT
Cdnf	AGACCGGACGCAGT
Cdnf	GGAACAAGCCCATC
Cdnf	GGAGACAGCTTCCC
Cdnf_Hspa14	CCCGGCGTAAACGC
Cdnf_Hspa14	CGCTCAGGAGAGGG
Cdnf_Hspa14	CGGCGCTCAGGAGA
Cdnf_Hspa14	GCTCCCAAGGAGCG
Cdnf_Hspa14	TTGGCTCTGATGAA
Celf2	AAATAGTGGGGGTT
Celf2	AGGGCGGGGAATGG
Celf2	CAGAACCCAGGCTT
Celf2	GAGTTAGGGCTTCA
Celf2	GCCGCCTGTCACCC
Celf2	TCAGGGTGAAGGAC
Celf2	TGAAGCCCTAACTC
Celf2	TTCAGCATCGACTC
Commd3	cctcggggaggttc
Commd3	CGCCCGAGGCCCGC
Commd3	CTCTCGCACGGTCT
Commd3	GCGCCCAGCTGATc
Commd3	gcgcgcacccgcgg
Commd3	gggacggttcggag
Commd3	gggaggttcggcga
Commd3	gttcgggagggttc
Comtd1	ATCTCGCCACCCGG
Comtd1	ATGCAGCCACCGGG
Comtd1	ATGCGGAACTGCGT
Comtd1	CATCTGGTGACACA
Comtd1	GCTCACAAGAGCCC
Comtd1	GGATAAAGTGAGTG
Comtd1	GGTGCCCAAGTTAA
Comtd1	GGTGCCCGAGGACG
Crem	AGGACGCCTTGTTG
Crem	CCGGGGAACTCGGC
Crem	CGAGAAGGCAGGCT
Crem	CTAGCACGCGCCTC
Crem	GAAGAGCTAAGGGG
Crem	GAGCCTTGGGGACG
Crem	GGGCGTATTGGAGG
Crem	TCCAGACCTAACGG
Cubn	AAGGATTCCTTCAG
Cubn	GAATCATCCACTGA
Cubn	GAGCCTCCTAAGCA
Cubn	GGTTACTGTTTCAA
Cubn	GTAACCAGCGGCTC
Cubn	TGAACCACAAAAGT
Cubn	TGTTCAACTTGTGA
Cubn	TTGTGCATAACTTA
Cul2	AGGCTGTCGTCCTC
Cul2	CAGGTAGCTGGCTC
Cul2	CGCGAGGAGGTCAA
Cul2	GACGGGCAGGTAGC
Cul2	GAGGAGGTCAAGGG
Cul2	GAGGTCAAGGGAGG
Cul2	GCCCAGAGCTCCGG
Cul2	TAGCTGGCTCGGGG
Dclre1c	CCAAGGGACTTGGG
Dclre1c	CCTTGAGGTAGGGG
Dclre1c	CGCCCCTACCTCAA
Dclre1c	CTGGGCGCCACTTC
Dclre1c	GACCCTTGAGGTAG
Dclre1c	GCCTACCCATAGGC
Dclre1c	GGAGGAACCAAGGC
Dclre1c	GGGGCGGAGCCAAT
Dhtkd1	ACGCGGCTGTACTC
Dhtkd1	agaggggagaatac
Dhtkd1	CACGCCTTGTATAC
Dhtkd1	GAGGCGGGCCTCTC
Dhtkd1	GGAATCTGAGGAGT
Dhtkd1	GGCTGGTAGGTTTG
Dhtkd1	GTATACAGGCTGGT
Dhtkd1	GTGACTATTAAGGC
Dlg5	ATCGCAGTGTGCGG
Dlg5	CCCCGGCCCGCCTT
Dlg5	CTTCGGCCTGGAGG
Dlg5	GAAGGGGAAGGGTC
Dlg5	GGCAGTATGTGAAC
Dlg5	GGGCCGGAGCCGTC
Dlg5	GTGTGGGAGCTCGG
Dlg5	TGGGCGAAGGGGAA
Dnajc1	ATCGCGGACCTCCT
Dnajc1	CAACTGTGGGGCGG
Dnajc1	CCAAGCGGCCGTGT
Dnajc1	CTAGGCCGGGGCGA
Dnajc1	GCGAGGGTCTAGAG
Dnajc1	GCGCTGGCTAAAAG
Dnajc1	TAGCAACTGTGGGG
Dnajc1	TCCTAGCAACTGTG
Dupd1	ACAGAGCCCTTAGA
Dupd1	AGATACAGGACATG
Dupd1	AGCAGTCCTGTACC
Dupd1	ATGTCCTGTATCTG
Dupd1	CAGAGACAAACATG
Dupd1	CCTGAGGCCTCCTA
Dupd1	CGGGCTGGGGGCCG
Dupd1	TGCAGGCCCTCTAA
Dusp13	aagtgctTTGAAAT
Dusp13	agatcgtgacttgT
Dusp13	CGAGAACATGGAGT
Dusp13	gaaggaactgacag
Dusp13	ggaactgacagagg
Dusp13	GGAGACTTTAGGGA
Dusp13	GGGAGTCAGCTCAA
Dusp13	TCTCGGAGACTTTA
Dydc1	AGAACCAGATTTAT
Dydc1	AGGGCTCCTATCTA
Dydc1	CACTGTAGGGGATG
Dydc1	GCACGCACGCAGAT
Dydc1	GCGCAgtgggagtg
Dydc1	GCGGGACAGAGACT
Dydc1	GGAATTCGCGCAgt
Dydc1	GGGACGCGACTCAC
Dydc2	ATAGGTGTCAAGAG
Dydc2	CACAGCATCACTTC
Dydc2	CTATTAGGAAATCT
Dydc2	CTCATTTACTTTAC
Dydc2	GACATAGACAACAG
Dydc2	ggcaACAGCAGACA
Dydc2	GTGGCATTCTGTCT
Dydc2	TGAAGTGATGCTGT
Echdc3	AAACTAGTGGAGCG
Echdc3	ACGCCCCCAAACCC
Echdc3	CGGGGCCCTGCCCT
Echdc3	CTACACCCAGGGCA
Echdc3	CTGCCACTCATCAC
Echdc3	GGAGCGGGGCGGGT
Echdc3	GTGAAGGAGTTTAA
Echdc3	TAGTGGAGCGGGGC
Eif5a	GAGCTGTCGCTCAA
Eif5a	GCGCAGTGCGGGGG
Eif5a	GCGCGGCTGTCATA
Eif5a	GCTTGGTTGGTCAG
Eif5a	GTCGCTCAAGGGGA
Eif5a	GTGGAGATCGGGGA
Eif5a	TCCCACCTACCCAT
Eif5a	TGCGCATTGCCGAC
Enkur	GGGGAGGAGCCTCG
Enkur_Thnsl1	AGCCTCGGGGTAAT
Enkur_Thnsl1	CGATCGACGGGGAA
Enkur_Thnsl1	CGCCCATTACCCCG
Enkur_Thnsl1	CGCGGCCTGAATGT
Enkur_Thnsl1	GTGGAGCGATCGAC
Enkur_Thnsl1	TCGGGGTAATGGGC
Enkur_Thnsl1	TGGGCGGGGCGTCT
Epc1	CGCCGGCCTTCCCA
Epc1	CGGCTGGGATGCTC
Epc1	CTTGAGCACCGCGC
Epc1	GCCGGCGCGTAGAG
Epc1	GCGCGATGCAGTGT
Epc1	gcgcgggctcgagc
Epc1	gcgggcgaggccgg
Epc1	TGCAGTGTGGGGAA
Etl4	CCCTCTTGAATCTC
Etl4	CCTGAGATTCAAGA
Etl4	CGCCCAACAGGTGA
Etl4	GCAGCTTAGGGATA
Etl4	GCAGGCTGCGTCCT
Etl4	GTCGCCAGGACTGG
Etl4	TAGGCCCCCCAGAT
Etl4	TTCACACAGGACTA
Fam107b	GAGCTCTGGATCCT
Fam107b	GCCACGCCCCCGAA
Fam107b	GCTGAAAGCTCGGG
Fam107b	GGGCACCCAAGCAA
Fam107b	GGTCGGCCGTTCGG
Fam107b	TCAGATGAGAGCTC
Fam107b	TCGGGGGGCGTGGT
Fam107b	TTGGTCATGTGGCA
Fam171a1	AGCTTCAGGATGAG
Fam171a1	AGGGGTTAAGGCGC
Fam171a1	CAAATCTACCCTGG
Fam171a1	CAGCGTGACGTCGA
Fam171a1	GCACCACGGACCCA
Fam171a1	GCTGGGTTACCTAA
Fam171a1	GGACTCCCGCAGAG
Fam171a1	TCTGCGGGAGTCCC
Fam213a	AAAGAAGTGCCCGA
Fam213a	AGCGTGGCTTTGTG
Fam213a	CGCAGCTCCAGACT
Fam213a	CTCAAAGAAGCTAG
Fam213a	GGACTGGGTAGAAC
Fam213a	GTTTGGAACTAGCG
Fam213a	TGAAAGTGGCGTGG
Fam213a	TGGCGTGGTGGCGT
Frmd4a	AGGAGATGCTAAGG
Frmd4a	AGGGCTTGCGGCAT
Frmd4a	CAGGTCTCTTGCAA
Frmd4a	GAATGCAGATCCGA
Frmd4a	GCGGCTAGGATCAC
Frmd4a	GGATGATTGTGATC
Frmd4a	TGCGGCATGGGCTG
Frmd4a	TTGCAAGAGACCTG
Fzd8	CCCACGCCTCTCCT
Fzd8	CCCAGGAGAGGCGT
Fzd8	CGGGACAGACCCTG
Fzd8	CTGCAGAGAAAAGT
Fzd8	GCCACAATTCCACA
Fzd8	GCGCAGCATGGAGT
Fzd8	TCCGGGCCCGAAGA
Fzd8	TGAGTGCGACTCAG
Gad2	AGAGAGTGACGGAA
Gad2	AGAGGGAGCTTGGT
Gad2	CCATTTAACCTCGG
Gad2	CGGCAGCGCGACGA
Gad2	GCCGAGGTTAAATG
Gad2	GTGCGAGTCAGATG
Gad2	GTGGGTGTCACACA
Gad2	TGACCCCAGGGACA
Gata3	gccccTCTACTGAC
Gata3	GCGGCGCCCCTTTC
Gata3	gcggcggtgtgccg
Gata3	gcggtgtgccgggg
Gata3	GTCAGTAGAggggc
Gata3	TAGGCGGCCCTTGG
Gata3	TCCTGGAGCGGGTT
Gata3	TTCCGGTCAGTAGA
Gdi2	CGAGAGGGGAACGA
Gdi2	CTCTCGCGAGAGAA
Gdi2	GAGCCAAGCTGCAG
Gdi2	GAGGGGAACGAGGG
Gdi2	GCCAACCTTCGGAG
Gdi2	GCCAGCCTCTCCGA
Gdi2	GCGCCGTCAGTCAA
Gdi2	TCGCGAGAGAAGGG
Gjd4	AAGAATAGTCACAG
Gjd4	ATTATGTCCCGAAG
Gjd4	CACAGCTACAAGTC
Gjd4	CAGAAAACGTTCAT
Gjd4	GCCCTGCAGTTGTC
Gjd4	gtgagcagtaacta
Gjd4	TGGAATGTCCTGCG
Gjd4	TTGGCAAGCAGCTT
Gpr158	CAGCTGATTGACAG
Gpr158	CCCGAGGCGCACTG
Gpr158	CTCGGGTTCAGCAC
Gpr158	GAGGCGCACTGAGG
Gpr158	GGGTGGCAAGGAGT
Gpr158	GTGGGTGGGAAATA
Gpr158	TCAGGGAACACGAG
Gpr158	TTGGACTACTGAGG
Gtpbp4	AGCGAGTGACGAGC
Gtpbp4	CTTGCGGGGTGAAA
Gtpbp4	GCCGCCAAGAGCCG
Gtpbp4	GCCGGCTTGGGTGA
Gtpbp4	GCGGCTCTTGGCGG
Gtpbp4	GCGTCCGCCTAGAC
Gtpbp4	GCTGGGTTTAGAGG
Gtpbp4	GGGAGACTCCCGGC
Hspa14	CGGTGTGGGGCCGA
Hspa14	GTGAAGCCGGAAAG
Hspa14	TGGAGGCCGGTGTG
Idi1	ACTTGCCCTGCGTG
Idi1	CAAGCCTGACGTCA
Idi1	CTGGGACCCGAGCG
Idi1	GAAAGAAGCGCTGG
Idi1	GCGCTAACCTGGCG
Idi1	GCGGCCGTGACGTC
Idi1	GTCTAGCTGCTCCG
Idi1	TCCAGGAGTGATTG
Idi2	AAGTGGCTGTCATT
Idi2	ATGTGGTCCTTAAG
Idi2	CCCCTCATTATGAG
Idi2	CCTGCGCTTCTCAA
Idi2	CGCAGGTGGGGCTG
Idi2	GACCAGTGTGAGGT
Idi2	TCAAGCACAATGAA
Idi2	TTGGGTGTAACTCA
Il15ra	CAACGGGAAGTTCT
Il15ra	CAGGGCTACTTAGA
Il15ra	CCAGAACTTCCCGT
Il15ra	CGGGAAGTTCTGGG
Il15ra	CTGAAGTCAGGTGT
Il15ra	GCCAGCACCACTGC
Il15ra	GGACAGTCAAGCTC
Il15ra	GTACAGCCGGAAGA
Il2ra	AGGGCTCTAGGGTC
Il2ra	AGGTCGTGCAACGG
Il2ra	CAACGGGGGTGGAA
Il2ra	CTCCTGCCGCGGCA
Il2ra	CTGAGTCCTCTAGG
Il2ra	CTGTGATCTCATAT
Il2ra	GCAAGGTCGTGCAA
Il2ra	TGGTGAGAAGGATC
Itga8	AAAGAGTGGTTATA
Itga8	ACTCGAAATCTAGC
Itga8	AGAGGGTCGAGCGC
Itga8	AGCGGCTAGTTCTC
Itga8	CGGTGTTCCATATG
Itga8	GCCGGCCCCAGCCA
Itga8	TTCGCGCCCTCTAG
Itga8	TTGCGGTCTAGGAC
Itgb1	AAGCTCTTTCTCCC
Itgb1	CGCGCCTGAAAAGG
Itgb1	CTCCTTTTCAGGCG
Itgb1	GAATGCGTTTCCGG
Itgb1	GAGCTTcgcggcgg
Itgb1	GCCTGAAAAGGAGG
Itgb1	GCGCTGAACCACCG
Itgb1	gggcggcTTCCTGA
Itih2	AAAATCAAGGGTAG
Itih2	AGCAAGGCCAGGAT
Itih2	AGGGTCAAACAGCA
Itih2	CAGGAGCAGTTCCT
Itih2	CCAGGAACTGCTCC
Itih2	gtgCAccaatatgt
Itih2	TCAAACCTGAGCTG
Itih2	TTATTCAAACAGCA
Itih5	AGGCGACAGGACTC
Itih5	CCAAGGTTGACCGC
Itih5	CTTTGGTGGAGGAA
Itih5	GAGAGGCGTGGCCT
Itih5	GCCTCTCTGTCCCT
Itih5	GGGGAGGCAAAACT
Itih5	TTGGAGCCCAGGGG
Itih5	TTGGGGAGTTTAGA
Kat6b	ACGGACAGACCCGT
Kat6b	CGCGGTCTGTTGAT
Kat6b	CGGCACCACCCCGA
Kat6b	CTCTGCCCCCCATT
Kat6b	CTTGCCCCAATGGG
Kat6b	GAGTGTTTAGCGAG
Kat6b	GCGAGATGACCGGC
Kat6b	GGGGGGGAAATGAT
Kcnma1	AGGAGAGATCCCTA
Kcnma1	atggagcactgaga
Kcnma1	ctagaacctctctt
Kcnma1	ctccatctttctgt
Kcnma1	gcttgtcctaggtt
Kcnma1	GGTTTCCCAGATGA
Kcnma1	gtcagagaccagtt
Kcnma1	ttctagctcaaacg
Kif5b	CGGGACAGGATAGT
Kif5b	CTTCCGATGCTCTG
Kif5b	GCCGAGGAGCATCG
Kif5b	GCCGGCGGCAAACT
Kif5b	GCGCGGGCAAGGAT
Kif5b	GGCGGCAAACTGGG
Kif5b	GTGGAGGCCGGTGA
Kif5b	TTCTGCAGCGGCCT
Kin	GAGCTCAGGCGCCC
Kin	GGACCACATCGGGA
Kin	GTGCGCGGGAGCTC
Klf6	AGCGGGAGGAAATG
Klf6	CAAGCTGGTCACGT
Klf6	CCCGGGTACAGGAG
Klf6	CGCTCCTGTACCCG
Klf6	CTCGCACCAATCGC
Klf6	GCAGCCCCGGGTAC
Klf6	GGAGCGGCAGGATT
Klf6	GTGCGGACACACAG
Larp4b	AGGGCGCCGGGGTA
Larp4b	CGATTGGCTAAGAG
Larp4b	CGCCGACTGGCGTT
Larp4b	CGCTGCGTAGCGAT
Larp4b	CGGGGGAAGTAGAA
Larp4b	GCGCACCCATCTCG
Larp4b	GCGCCGAGAGGCCG
Larp4b	GGGAAGTAGAAGGG
Lyzl1	AGACAGCTTATCCA
Lyzl1	ATCACTTGCATGGG
Lyzl1	CAAATTCTAATTAC
Lyzl1	CTGAACAGTCTTGT
Lyzl1	CTGTAATTAGAATT
Lyzl1	GATATCACTTGCAT
Lyzl1	TCTTGTTGGATGTC
Lyzl1	TTAGTTATGGGTGT
Map3k8	ACTCGAGTGTTCAC
Map3k8	CAGCGGGAGGACCA
Map3k8	CTCCGTTTCAGAGT
Map3k8	CTGAAACACACTCA
Map3k8	GAGGAGGTTGGCGT
Map3k8	GGACCCAGGCGTGT
Map3k8	GGTGAACACTCGAG
Map3k8	TGAGTGTGTTTCAG
Mastl	GCCGGAAGGGGCGC
Mastl	GCGGCGCTGCCGGA
Mastl	TCCGGCAGCGCCGC
Mastl_Yme1l1	AGCCCGTGTATCCG
Mastl_Yme1l1	AGGCATCGACGGGT
Mastl_Yme1l1	CTGGGCGCAGTCTG
Mastl_Yme1l1	GGCTCCCTGTAAGC
Mastl_Yme1l1	TAAGCAGGCATCGA
Mat1a	AAGTGGCAAGTCTG
Mat1a	ACTTCCGGTCCGAG
Mat1a	CCATACCAAATCTC
Mat1a	GAAGGAAGTCCGAA
Mat1a	GTCTAAGTGAGATT
Mat1a	TCCAGAGCAGGTGT
Mat1a	TCTGATGTCTCAAG
Mat1a	TGGGATGGTATCCC
Mcm10	ACTTCCGGTTGGTG
Mcm10	AGATCCTTGGCTGG
Mcm10	AGGAGCAGCAAAAC
Mcm10	CAGCAAAACTGGTT
Mcm10	GCGTTCATTTGTGG
Mcm10	GTCGACGTCAGAGT
Mcm10	TAGAGCAACCTGAT
Mcm10	TTAACTTACAGAGA
Meig1	AGACCCAGAAGCGG
Meig1	AGCAGCGCCAACCG
Meig1	AGTTCTCTGCAGAG
Meig1	GAGGAAACTGGGCT
Meig1	GGGGATTCCCCGGT
Meig1	GGTCGGAGGAAACT
Meig1	GTGCGCATGCACAA
Meig1	TCGCTCACGTGGAC
Mkx	CCCGTCTTGGCCGG
Mkx	CGCGGGATGTTCGT
Mkx	CTACGAACATCCCG
Mkx	GCGCGCATCAGTCT
Mkx	GCTGTTAACCCCTC
Mkx	GGAAGCGATCGCGC
Mkx	GGATACCGCGTCCG
Mkx	GTATCCATGTTCCC
Mllt10	CGGTAGACTCACTC
Mllt10	GAGGTGTGCGGAGG
Mllt10	GCCGAGCGGTGCGG
Mllt10	GCCGAGGTGTGCGG
Mllt10	GGGACGAGCGGAGT
Mllt10	GGGGCCAGGGGACG
Mllt10	GTGTGCGGAGGTGG
Mllt10	TCTGGGGCGCACGA
Mpp7	CAGAGTGTCAGTCA
Mpp7	CAGCGCTCTCTCAT
Mpp7	GCCCAGGTGACTAT
Mpp7	GGGCGGAGACTCTG
Mpp7	GGGGTCTCGCTGGG
Mpp7	GTCAGTCAAGGAGT
Mpp7	GTGCATTGGCGGGG
Mpp7	TCATTGGTTGGCAA
Mrc1	AGGCCATGAGCAGC
Mrc1	ATATCCTGTCACAT
Mrc1	GGATATCTCTCAAT
Mrc1	GGGAAAAAGTCTCC
Mrc1	GGGAGGACACTCGC
Mrc1	GGGCAGTAACCAAA
Mrc1	GTAAGCTAAGGCAC
Mrc1	TTGGAAAGGATCAA
Msrb2	AAGTTAAGTGGTGG
Msrb2	AGGCAGTGGAGTCC
Msrb2	GAGGATAAGTTAAG
Msrb2	GGGGAGGGATCCGG
Msrb2	GGTACTGCGGGAGG
Msrb2	GTGTGGAATATCCC
Msrb2	TAAGGTACTGCGGG
Msrb2	TAGCCAGGTCTCAA
Mtpap	AAAGCAAAATACGA
Mtpap	ACGGGAAGCCCATT
Mtpap	AGAGACCGCAACAA
Mtpap	CATTAGGTCAAACT
Mtpap	GCAACACTTCACCA
Mtpap	TCTCCTCTGTTGTG
Mtpap	TGCATATACTTACG
Mtpap	TTGTTGCGGTCTCT
Myo3a	AGGAGCGTCTGGGT
Myo3a	ccgccccTCTGTAG
Myo3a	CGTGGCACCTCCCA
Myo3a	CTGGACAGCAACTC
Myo3a	GACTCAGGAGCGTC
Myo3a	GCCCAGAAACCACA
Myo3a	GGCACCTCCCAGGG
Myo3a	GGGTCCCCTACAGA
Nebl	CCAGGCCTCATGGG
Nebl	CTGGAGTGAGAGGA
Nebl	GCCACAGCAGTCCG
Nebl	GCCCCGGACTGCTG
Nebl	GCGAGCGCAAGGGG
Nebl	GGAGGTCAGAACTG
Nebl	GGCGTCAGCGACAA
Nebl	TCCCCAGGCCTCAT
Net1	GAAGTCTTCTGATT
Net1	GATTGGCCGATCTC
Net1	GCCAATCAGAGAGT
Net1	GCCTTTCAGGAGTA
Net1	GCTCCAGTGACAAA
Net1	GGGAAGCGGTTGCT
Net1	GTAAGGTGAAAGTT
Net1	GTTGCTAGGCTACG
Nmt2	ACGCCCATCACAGC
Nmt2	CGCCCTGACTGAGG
Nmt2	GCACGCAATGTGGG
Nmt2	GCAGACTCGAGACT
Nmt2	GCCCGCCTCAGTCA
Nmt2	GGCGGGAGCCTCAA
Nmt2	GGGCCGGCTGTGAT
Nmt2	TAGGCACGCAATGT
Nrg3	AGGAGGCACCTAGG
Nrg3	AGGCGCTCGGTAGA
Nrg3	ccgccggccggTCA
Nrg3	GCGACGGGGTCCCT
Nrg3	GCGCACACAGGCGG
Nrg3	GGAGCGCACACAGG
Nrg3	ggccggTCAGGGAG
Nrg3	TAGAGGGGCGAGAc
Nrp1	AGCAGGGTACCCGG
Nrp1	AGGGTACCCGGAGG
Nrp1	CAGAGATCTCGTCA
Nrp1	CCAGAGGACCAACC
Nrp1	GAGCTGTGCgggga
Nrp1	GGTCACTAGGGAGC
Nrp1	GTCCGGGTTGTCTG
Nrp1	TGCTGTGCTCTCCG
Nsun6	ACAAGTAGCGGTGG
Nsun6	ACGAACAGAAGGCT
Nsun6	ACTAACCTGAAATA
Nsun6	ATCACCTCCCCTGA
Nsun6	GCCGGGTACATCCT
Nsun6	GTGGAGGCTTCCCT
Nsun6	TCAGGGGAGGTGAT
Nsun6	TGGGCATCGAGTGC
Nudt5	AAGTGGGTACCACG
Nudt5	CGGAGTCAAACCGG
Nudt5	CTGCGCAGCACTTC
Nudt5	GGACTTTTACGGAC
Nudt5	GGCGGCTATTGACG
Olah	AGGTGAATCATCTG
Olah	CAAGGAATATGGGC
Olah	CTAGTAAATTGTCA
Olah	CTGCCCATATTCCT
Olah	gttatccagggcta
Olah	TATCACAACATCTG
Olah	tgaagcaggatgct
Olah	ttggaagttatcca
Optn	AGACCCTGGGGCTC
Optn	AGGGTCTGTCTCCG
Optn	CGGAGCGTTGGGCG
Optn	CTCCGCGGTTCGTT
Optn	GCAGGTGAGATTGA
Optn	GCATCAGATGGCCC
Optn	GCGGAGACAGACCC
Optn	GGGCGTGACCGAGT
Otud1	AGCGGAGACCTCAT
Otud1	CAGCAACCGTAGTC
Otud1	CATGAGGTCTCCGC
Otud1	GCCCCGCCCTCCAG
Otud1	GCCCCGCTTGAATG
Otud1	GGGGAGGGCGAGGC
Otud1	TCACGTGGTCCCAC
Otud1	TCCGCTGGAGGGCG
Pard3	CGCGTCGCAGCCCG
Pard3	GAGCACAGCGCCGC
Pard3	GAGCGGCCGGGCAG
Pard3	GCGGCGCTGTGCTC
Pard3	GCTGGAGCCCTCTG
Pard3	GGCAAGTGGGCTGG
Pard3	GGGGCGTCCCGGAG
Pard3	TACGGCAAGTGGGC
Pdss1	ACCGGGTGGGGAAC
Pdss1	AGCCAGTGGCTCCG
Pdss1	AGCGTGCAGAAATC
Pdss1	CCCAAGCCCAAACC
Pdss1	GAGGACAGGCGACC
Pdss1	GATAAAAGCGGACG
Pdss1	GTAGGACAACAGTT
Pdss1	TCTTCAACCCTCCT
Pfkfb3	ACTTAGGGACGGAA
Pfkfb3	CGAAAGAACCAGCC
Pfkfb3	GCGCAAGACAGGAA
Pfkfb3	GGACGCAAAGAATG
Pfkfb3	GTGGAGAGAAGGGT
Pfkfb3	TAGGGAATAAACTT
Pfkfb3	TAGGGACGGAAAGG
Pfkfb3	TCGTCCACCCGCAG
Pfkp	ATGGGCTGTGGCGA
Pfkp	CGGGACTCACGCAA
Pfkp	CTGCAGGGGTGGAC
Pfkp	GACTCCACCTCTCA
Pfkp	GCAGGTGGGGTAAT
Pfkp	GCCCGAGCGCCAAT
Pfkp	GGAGGGATTATAGC
Pfkp	TGCGCCCACGTGGT
Phyh	AAAGACACAGCGGC
Phyh	CACCCTCTACTAGG
Phyh	CAGTCGCAAAATTT
Phyh	CGCCTCCTAGTAGA
Phyh	CTCCTAGTAGAGGG
Phyh	GCCCGAGGCCGTTA
Phyh	GCTCAGATCCCTAA
Phyh	GGAGTTCTGTCCAA
Pip4k2a	CCCCAGACGGATCG
Pip4k2a	CGATCCGTCTGGGG
Pip4k2a	GACGAGCACTCTCC
Pip4k2a	GCCGCGATCCGTCT
Pip4k2a	gcggcgccgacggg
Pip4k2a	GCTCGTCTTAGCAC
Pip4k2a	GCTGCTGCGGAGTG
Pip4k2a	ggcgggTGCGGATG
Pitrm1	AATAGGCTGGAGGG
Pitrm1	ACGACGTCTCTAAT
Pitrm1	CGAGTGATAAGTGA
Pitrm1	CGCGGGGCGGGGAA
Pitrm1	GCGGTCCAGGAAAA
Pitrm1	GCTCCTCCCCACGG
Pitrm1	GGATCCTCCGCCGT
Pitrm1	TGATAAGTGATGGG
Plac9a_Plac9b	caggtgaatatcct
Plac9a_Plac9b	CGCTGCCCAGACCc
Plac9a_Plac9b	ctgGGTCTGGGCAG
Plac9a_Plac9b	gaatatcctgGGTC
Plac9a_Plac9b	gctgctcactgtgt
Plac9a_Plac9b	gtgtggggaaagcc
Plac9a_Plac9b	tcaattgcacagac
Plac9a_Plac9b	tgtctgtgcaattg
Plxdc2	ACCAACCTGTCCAT
Plxdc2	AGGTGGGAGAAGCC
Plxdc2	CAGCTCTACACTTT
Plxdc2	CTCGCACCAGTCCT
Plxdc2	CTGCGGGTTTTGGG
Plxdc2	GGGCGGATGGCGTC
Plxdc2	GTCATGAACCGGGT
Plxdc2	TGCGAGTGGGGCGG
Polr3a	AAGGAGCCGCTAGA
Polr3a	ATGGCTTTTTCAGG
Polr3a	CAGCAGAAGAGgcc
Polr3a	GCCGCGCAGATCAG
Polr3a	GCGCAGATCAGTGG
Polr3a	GCGGCGCTCTACGG
Polr3a	GGAAGCGGCACGTG
Polr3a	GTGCATTTTCGTGA
Ppif	AACAGGTTCCGAGG
Ppif	AGCGGCAACCGGCA
Ppif	CCGCCTTTATTGGT
Ppif	CTGCCGGTTGCCGC
Ppif	GAGGTGGCTCAGAA
Ppif	GCTGGCAGCGTAAT
Ppif	GGACGCTAGCGAAC
Ppif	GGCGGAGGCGTGGA
Prkcq	AGCAGTCACCGGGC
Prkcq	AGGGCTAAGGTCGC
Prkcq	CAAGGGTACTCCGG
Prkcq	CCAAACACACTCGT
Prkcq	CCGGGTCCCAGTCG
Prkcq	CGACTGGGACCCGG
Prkcq	GAGTGCCAGAAAGG
Prkcq	GCATAGAGGCTTCT
Proser2	CAGCCAAGGGCTTT
Proser2	CCGCGATACTTAAA
Proser2	CGAGAAGGCCTGAC
Proser2	CTGCCGCGCGTTCC
Proser2	GAGGTGCAGAGCGC
Proser2	GCGCAGACTACCTC
Proser2	GGAACGCGCGGCAG
Proser2	GGCCGACTGGAGTC
Prpf18	AAAAGgccgggcaa
Prpf18	CACAAGTGTGTATC
Prpf18	CCTCGGCGCGAACG
Prpf18	GCAACAATACTCAG
Prpf18	ggcaaaggtagcac
Prpf18	TCAGGATGAACGAA
Prpf18	TTCCGGCGGAAATC
Prpf18	TTGTTGCCCCCTAG
Pter	ACATGCAAAGTGGG
Pter	AGTGGGCGGGGAAA
Pter	GACTTAGGGTCAGT
Pter	GGCGCGGGCTCACA
Pter	GTGAGGCGATGATG
Pter	GTGGGAGGATCGGA
Pter	TAAACTGCTCTCAG
Pter	TGGACATGCAAAGT
Ptf1a	AAGAACGTAGGAGC
Ptf1a	AGAGCGCGGGGCGC
Ptf1a	CTGGCTGGGAACTG
Ptf1a	GCTCCTACGTTCTT
Ptf1a	GGACAGCGTCCCTG
Ptf1a	GGCTGCCAGTCCTG
Ptf1a	GGGACCCGCAGGAC
Ptf1a	TCATTCTGCCGCAC
Rab18	AGCGGGAGGAGTTA
Rab18	CCAAACATCCTGTA
Rab18	CCTGGTGTGCGCAG
Rab18	GCCTGGAAGGCCGT
Rab18	GCGCAGGGGCAGAT
Rab18	GGAGGAGTTACGGC
Rab18	GGCGGTGGTCACAG
Rab18	GTCTGCGTACTCCC
Rbm17	AAAGCTGCACTCTC
Rbm17	ACCCTGCTGACGGG
Rbm17	CCTAGTAGGGGATT
Rbm17	CTGCGTGTGACTCG
Rbm17	CTGGAGCCTAGTAG
Rbm17	GCGCCATTGGCACA
Rbm17	GGGTAAGAGAGCGG
Rbm17	TGCACCCTGCTGAC
Rpp38	ACGACCAGTCAGAA
Rpp38	ATGGGTGGCTATAA
Rpp38	CAGGGACGCGTGCA
Rpp38	CCAAAATGACGATG
Rpp38	CTCGGTTCTGTGAG
Rpp38	GATGCGGAACAGCT
Rpp38	GCGTGCAGGGGAAT
Rpp38	TGCAGGGGAATGGG
Rps24	AAGTACTTTCGGTC
Rps24	AGGACGGAAAAGAA
Rps24	cgacccttttgcaa
Rps24	GCTAAGGGCTAGCG
Rps24	GGACCCCAGCGCGG
Rps24	gggtcgtgaccctt
Rps24	GTGGCTAAGGCCTT
Rps24	TGGCTGGCCTGAAT
Rsu1	AAAACGTGTACGAT
Rsu1	AGGGGATTCTAAGC
Rsu1	CCCACTGAAGAAAG
Rsu1	GCGATCGCTGGGAC
Rsu1	GCGCACACAAAATC
Rsu1	GGACAAAGTTCTGT
Rsu1	GTGTCAGGCCGGGA
Rsu1	TCCTCAGCGTAGGG
Samd8	AACCGGAAGAGGAG
Samd8	AAGCAGTTCCGGTT
Samd8	AGGAGAAGGCTTGT
Samd8	GAGGGGAAACCCAA
Samd8	GCATAATTCATCAA
Samd8	GCGGCCAGCCGAAC
Samd8	GTGGGTTGTTGACT
Samd8	TCCAAAACCGGAAG
Sec61a2	CCATAGCAACGCGG
Sec61a2	CCGCCCACCACGGC
Sec61a2	CGGAAAGAAAAGTC
Sec61a2	CGGCCTGCCGTGGT
Sec61a2	CGTTGGCGCGGCGG
Sec61a2	GAAAACCCTTGTCC
Sec61a2	GACTGGATGGCAAG
Sec61a2	GGATGGCAAGAGGC
Sephs1	gcccgccgccTTAA
Sephs1	gccgccTTAAAGGG
Sephs1	gccTTAAAGGGAGG
Sephs1	ggcccggTTCCCGG
Sephs1	GGCCCTCCGGGAAc
Sephs1	ggccggagcgcctc
Sephs1	ggcggcccggTTCC
Sephs1	GTGGAGCTCGGCCT
Sfmbt2	ACAACCTGAGGCTT
Sfmbt2	CGGAAGTCCTGGTA
Sfmbt2	GCAACCACAACCTG
Sfmbt2	GCGCTTCCGTCCAG
Sfmbt2	GCTGGGAGCTAGGT
Sfmbt2	GGGAGCTAGGTGGG
Sfmbt2	GTTGAGAGCTATTC
Sfmbt2	TCTCAACTCACACT
Sftpa1	AAGGAGGGCCGGAC
Sftpa1	ACTCCCAAGTGTGT
Sftpa1	ACTTAGAACCCTTG
Sftpa1	AGAACCCTTGAGGG
Sftpa1	CACAGAACCACAGA
Sftpa1	CCCTATCACAAAGG
Sftpa1	CTCCTTTGTGATAG
Sftpa1	CTGTGCCACCCTCA
Sftpd	ATAGCTAAGGGAGC
Sftpd	CCATGCATAGCTAA
Sftpd	CTGTGCAAAATGAT
Sftpd	GGCAGCAACCTGTG
Sftpd	GGTGGAGTAAGAGT
Sftpd	GTAGGTGAGTCAAC
Sftpd	GTGCACATAGTGTC
Sftpd	TAGCTCCACTTACA
Sh2d4b	AAATCCACCTGGGT
Sh2d4b	AGCAGATACAGTTG
Sh2d4b	CAGCAAGAACCAAG
Sh2d4b	CCCTGCAGATAAGA
Sh2d4b	GAGTGATCTGTTAG
Sh2d4b	GATAAGAGGGGGTG
Sh2d4b	TAGGCCTCTGACAT
Sh2d4b	TGAGCCAATGTCAG
Skida1	AGGTGGCAGTATAA
Skida1	CCTCCACTCCCAGA
Skida1	GATAATAGCTGTAT
Skida1	GTAGGAGATTTTGG
Skida1	GTATGCTAATTAGT
Skida1	GTATTATTTACTTT
Skida1	GTATTTCTTTAAAG
Skida1	TTCCATTAAACTAT
Slc39a12	AAGCGGACAGTTGC
Slc39a12	AAGTAGATACAAAT
Slc39a12	CCATGAGATAACCA
Slc39a12	CTAGAAATGTCTCT
Slc39a12	GACGGTAAGAATGA
Slc39a12	GGTAAGAATGAAGG
Slc39a12	TAATCAAATAAATG
Slc39a12	TCATTTGCCTTCCA
Spag6	ACGCCTACAGGTTG
Spag6	CAACAACCGGCAAG
Spag6	CACCCGCCTGGGGT
Spag6	CCAACCCACCAGAG
Spag6	GCGGGTGCAACAAC
Spag6	GGAGGGTGTCTCTT
Spag6	GGCCAGAGTGGGGA
Spag6	TCACGGCCAGAGTG
St8sia6	acCAGAGCCCGCAG
St8sia6	AGCAGCTGAAAAGT
St8sia6	AGTCGCAATGTGAT
St8sia6	CCAAGCGCGCACTC
St8sia6	GCAATGTGATTGGG
St8sia6	GCGCACTCGGGCGA
St8sia6	GCTTTCAGGCACGT
St8sia6	TCACCTGAAGGTTG
Stam	AGCCGCTAACCCCA
Stam	AGCGGCTAGGTTCT
Stam	CGCGTGGGCCTCGG
Stam	CGTGTCGGGAATGT
Stam	CTCTGTTGCTGGGG
Stam	GCCCGTGGGGTTAG
Stam	GCGGCTCATCGCGT
Stam	GGAAGAGACAGCGG
Suv39h2	ACTCCGGAGCGGGG
Suv39h2	CAGGGACTCCGGAG
Suv39h2	CCCGCCAGGGACTC
Suv39h2	CCGCCCCCACCGTG
Suv39h2	CGCATGAAGAATCA
Suv39h2	GCCCTGCCCGTCGC
Suv39h2	GCGCCGCACGGTGG
Suv39h2	TAGTGGGGCTTCGT
Svil	CCGGTGGTTGTGGT
Svil	CGGGGCGCGTGCGC
Svil	GCCCAGGCCGGGTC
Svil	GCCCCGCTGCTCCC
Svil	GCTCTGTGACTCGG
Svil	GTAAATAGAGCCCA
Svil	GTGAGTATCGTCTC
Svil	TCCGAGTCACAGAG
Taf3	AGGCTCCGCCCAGT
Taf3	CCTCGGTGTGTTCA
Taf3	CCTGAACACACCGA
Taf3	GAAGCCGAGTGACT
Taf3	GAGAGCGATCGTCT
Taf3	GCAGTACGAGCAGA
Taf3	TAAGAGGTGACCCT
Taf3	TAGAGCCTGGACGC
Thnsl1	AGGAGTTGAGACAG
Tmem236	AAACTCATGCAGAG
Tmem236	AACACTGGTTAAAA
Tmem236	ACTGGTTAAAAAGG
Tmem236	ATCTGACTTCTAGT
Tmem236	CAAGCATGGAACAC
Tmem236	CATTGAACCATATG
Tmem236	GATGCTGAATGTAC
Tmem236	GGTTCTATATCATA
Tmem254a_Tmem254b	atggcctgaggttg
Tmem254a_Tmem254b	caatggtgagatcc
Tmem254a_Tmem254b	gaaggaatggcctg
Tmem254a_Tmem254b	ggttgaggtcttgt
Tmem254a_Tmem254b	tcttgtgggcccaa
Tmem254a_Tmem254b	tggatctcaccatt
Tmem254a_Tmem254b_Tmem254c	catagtccaacatc
Tmem254a_Tmem254b_Tmem254c	tccaacatcgggat
Tmem254c	AAAGAGCAGTAGAC
Tmem254c	ACCCAAATGAGGCG
Tmem254c	CAAAGCCTCGACCT
Tmem254c	cccgatcccgatgt
Tmem254c	GAGGAGAGCAAATG
Tmem254c	TAGCCTGACTCTGT
Trdmt1	AAAAAGCACAAATC
Trdmt1	AACGGAGCGGACAT
Trdmt1	AGAAGCGAAGGGAA
Trdmt1	AGTTTGGAGCCCGG
Trdmt1	CCCGGGGGCTAGCA
Trdmt1	GCAGGGCTAGGAAG
Trdmt1	GCAGTCTCTCACTT
Trdmt1	TTAAGATCACAGTT
Tspan14	CAGCGGTGGGATGT
Tspan14	CGGGGTGCACGGTA
Tspan14	GAGGAGCGAAAGAT
Tspan14	GCGCCAGACGCACT
Tspan14	GCGGGGCGTAGAGA
Tspan14	GGAGCAAAGAGCGG
Tspan14	GGGGCAATCAGCGG
Tspan14	GTTCCTGCATGGGG
Tubal3	AACTTAGAAGACTA
Tubal3	AAGCCAGCCATACT
Tubal3	AGGCCCAGTATGGC
Tubal3	ATGACTCCACCTGA
Tubal3	cctctggtctccca
Tubal3	GACTAAGGTGTAGT
Tubal3	GTTTAGGCCCAGTA
Tubal3	tggagtctgtcctc
Ucma	AAGCTCCACTTCTG
Ucma	CACTGGGGGAGAGT
Ucma	CCGGGATGCCACTG
Ucma	CGGCTGAAACATAT
Ucma	GAGCTTGTGGGCCC
Ucma	GTGGGCCCTGGCAG
Ucma	TCCCACTTGGACTC
Ucma	TTGGGCACGGACGT
Ucn3	CCCCAGATTTCCAC
Ucn3	GAAGTTGGGagttg
Ucn3	GAGGTGACTAGAGG
Ucn3	GCTTACCTGTGTTT
Ucn3	GGAGGGTGAGCGGG
Ucn3	GTCACAGAGATGAC
Ucn3	TCCCAGTGGAAATC
Ucn3	TTGCAAGGGCAGGA
Upf2	ACATAGCGAGGGAC
Upf2	CGGCCGGGCTGCTA
Upf2	CTCACCAACGCGGC
Upf2	gccACTCACCAACG
Upf2	GCCGCGTTGGTGAG
Upf2	GCGGAACTCTAAGG
Upf2	TGAACACATAGCGA
Upf2	TGGACCTTCGTCTC
Usp6nl	acggcgactgttgg
Usp6nl	CAGGGCGGCTCTCC
Usp6nl	CCCTGCCTTCCCGG
Usp6nl	CTCTTCATGCAGAG
Usp6nl	gcaacggcgactgt
Usp6nl	GGAGAGCCGCCCTG
Usp6nl	ggccgcggccgcaa
Usp6nl	GGGCGCGCGCTCGA
Vcl	AGGCAGAGCCGCTA
Vcl	CAGGCCCCTCCCTT
Vcl	GCAGGGATTGCGAC
Vcl	GCGGCGACGTGAGA
Vcl	GCGGGGCGCCTGTG
Vcl	GGTCGCAATCCCTG
Vcl	TAGGAGCCACAGTC
Vcl	TCCCTTGGGAATGG
Vdac2	ACTCCGGAGCAGGT
Vdac2	AGACCGCTCACCCA
Vdac2	CCACGTGGTCACTC
Vdac2	CGCGCGGTCAGGAT
Vdac2	CGGAGTGACCACGT
Vdac2	GCACCCGCGCGGTC
Vdac2	GTCCGGCGGGGACG
Vdac2	GTGGGTCGAGAGCA
Vim	CGAGCCTTCCTCCA
Vim	CGGGAAGGATTCAT
Vim	GCGAGCCAGCCAAT
Vim	GCTAGGATGGCAGT
Vim	GCTAGGCCTTTCAG
Vim	GGAGGAAGGCTCGA
Vim	GGATGGCAGTGGGA
Vim	GGGCCCGAGATTGG
Wac	AAGTCACACTCGGC
Wac	AGCAGCAACCGGAA
Wac	AGGCGCTACGGCGG
Wac	CCGCGACCACCGTC
Wac	GAAAGCCCCTAATT
Wac	GAGTCGCCGTAGGA
Wac	TCGGCGGGCCGCGA
Wac	TCGGGCTCCGTGCG
Wdr37	AGGAGACTATCCCG
Wdr37	CAGGCTTGTTCCGC
Wdr37	CTAGGCCATAGTTT
Wdr37	CTGCAGAACGAGTA
Wdr37	CTGGTGGCGCAAGT
Wdr37	GCGGAACAAGCCTG
Wdr37	GTGGGACTGAGCGA
Wdr37	TCGCTCAGTCCCAC
Yme1l1	CTCATGCGGAGGGA
Yme1l1	CTCTCCACATTCTG
Yme1l1	GAAGCCACAGAATG
Zcchc24	AGATAGCGGATCCC
Zcchc24	AGGACCGAACTGGC
Zcchc24	AGGGGTCAGCGCAG
Zcchc24	CGAACTGGCCGGGG
Zcchc24	CGTCGGGGCCGGGG
Zcchc24	CTAGGAGCGGTCCC
Zcchc24	GGATAGGACCGAAC
Zcchc24	GGGGACCGCTCCTA
Zfp248	AAATGAGTCTGACA
Zfp248	ATACAGAGTGAGAC
Zfp248	ATGCGCAGAGGAAG
Zfp248	CACTGCAGGAGCGG
Zfp248	GAAAGTCCCATCCT
Zfp248	GTGCACTGCAGGAG
Zfp248	TCCACGTCCAGTGT
Zfp248	TTAGACAGCATCAA
Zfp438	AGCGAGAAGGTCGG
Zfp438	AGGTGAGGGGAGGA
Zfp438	CCTGTGAGCTTCGC
Zfp438	GCCCGGACTTGGGG
Zfp438	GCCTAGCCGGACGT
Zfp438	GCGCAAAGGACCAT
Zfp438	GTCGATAGACAGAA
Zfp438	TAACAGGTGAGGGG
Zfp503	AGGGGCGGCGAAGA
Zfp503	CCGAGGTGATTGGA
Zfp503	GACAAGCCGAGGGG
Zfp503	GATTGGAGGGTCAA
Zfp503	GCGAAATCGAGGGA
Zfp503	GGGGACAAGCCGAG
Zfp503	GGTAGCGAAATCGA
Zfp503	TGTTAACAGACTTC
Zfp9	ACCCCTCAAATCGG
Zfp9	AGAACCCCTCAAAT
Zfp9	cgccgccgccccac
Zfp9	CGGAGTCATCGCGG
Zfp9	ctgtggggcggcgg
Zfp9	gcacgcgatcctgt
Zfp9	gcgatcctgtgggg
Zfp9	GGGTTCTCCGATTG
Zmiz1	AGTCACGGCGGGAG
Zmiz1	CCGGCACGGAGTCA
Zmiz1	CGCGGTGCCTAACA
Zmiz1	gaacggagaagaaa
Zmiz1	GCACGGAGTCACGG
Zmiz1	GCAGAGCTGCGCGC
Zmiz1	GGGAGGCGAGAAGA
Zmiz1	TGGAGAGCGAACCA
Zmynd11	CCGAGTGGGTAAGA
Zmynd11	CCGCCGTCGGGCTG
Zmynd11	CCGGAGACAGGTCG
Zmynd11	CCTCAGCCCGACGG
Zmynd11	CGCAAGTCCCGCGC
Zmynd11	gcccggtttcgccc
Zmynd11	gccggggcgaaacc
Zmynd11	GGCTCGGGGCTCGA

## Sheet: Chr12p gRNAs
Mouse Homolog	gRNA Sequences
1700034J05Rik	TACTCTGAAACTGA				Total gRNAs	1959
1700034J05Rik	tacatgtcatactt
1700034J05Rik	gGATGGAAATCTTG
1700034J05Rik	GCACATACAATAGT
1700034J05Rik	ctgtagattacagg
1700034J05Rik	CAGAATTATGTAAA
1700034J05Rik	atgtgcaatcttgg
1700034J05Rik	acctagcatggcag
4922502D21Rik	TAGCACGCTCCAAC
4922502D21Rik	CTATACAAAGACCA
4922502D21Rik	CTAGCTGCCCTGAT
4922502D21Rik	CGTGCTACCGTTAG
4922502D21Rik	AGCGAGACACCCGT
4922502D21Rik	AGAGGATGCTAATC
4922502D21Rik	ACTGGATAGCTGAA
4922502D21Rik	ACCAGCAGCCAATC
A2m	TCTGGGCTCCTGTC
A2m	GCTGAGGAGCAGCT
A2m	CCTAGTTACTGCCA
A2m	CCCCGCCAGAGATC
A2m	CAGGACCAGATCTC
A2m	CAGAGAACTCGTGT
A2m	AGACAGACCTTCTG
A2m	AATAAGTGGCTGTG
Abcc9	GGTAGGGATGATCC
Abcc9	GGGTGGTCCTGAAT
Abcc9	GGCCGGAGTGATGG
Abcc9	GGCAAGGAGGGTGG
Abcc9	GCTCCGGAGGAGTG
Abcc9	GCCTCAGGCGTCTG
Abcc9	CCGGGCAAGGAGGG
Abcc9	CAGACGCCTGAGGC
Acrbp	GTCTTCAACAGCGT
Acrbp	CCGGGGTTACAGCT
Acrbp	ATGTCAGGAGCCAC
Acrbp	AGGGGTTAAGTGGC
Acrbp	AGGGGTAGGAACTA
Acrbp	AGCTAGGAGAAATT
Acrbp	AGCGCGCAGACCCG
Acrbp	ACCTCCTGGGTCTA
Acsm4	TGGCACTGAGTCAG
Acsm4	TGAGTCAGGGGAGG
Acsm4	TATGTCAATGTCCT
Acsm4	TATAAGGCACATCT
Acsm4	GTTTAGTTTTTCTT
Acsm4	GATCATAATCCCTT
Acsm4	GACAGACGCCTATA
Acsm4	AACCTGAGGTTAAA
Adipor2	TTGTAGCCCCAATA
Adipor2	TGAACGGCCTAGGA
Adipor2	GTGCTGAAAACACT
Adipor2	GCCTAGGACGGCTA
Adipor2	GCCCCAATAGGGAA
Adipor2	GAGCCAGGGGACGA
Adipor2	AGTAATAACGAAGT
Adipor2	AGGTGCTACGTGAA
Aebp2	TCGAAACCCGAAGT
Aebp2	GTGGAGCAAGTGTC
Aebp2	GCCCAAAGAAACTC
Aebp2	GAGCGGGAAGGCGT
Aebp2	CTCCTCCCGCTCTG
Aebp2	CGCGCGCACTCACG
Aebp2	ACTTCGGGTTTCGA
Aebp2	AAACTCTGGAgggg
Aicda	TGTTGGATACCTGG
Aicda	TGATGCTGTCGTGG
Aicda	GGTCCAGTAAAGAT
Aicda	GGATTAAATGATTG
Aicda	GGACCCAACCCAGG
Aicda	GATGGGCGGGGCTG
Aicda	CAGTAAAGATGGGC
Aicda	AGGTAACAAAGATC
Akap3	TGTTAGAGTGAAAT
Akap3	GGGGAGTATGGGAG
Akap3	GCTCAAAAAAAGGG
Akap3	GAGGTGGGTGAATA
Akap3	CCAGTTCTTCTAAC
Akap3	CCAGGTCAGATAAG
Akap3	ACCTCAAATACTAA
Akap3	AAATGGGGGAGTAT
Amn1	TGCTCAGAACTAAC
Amn1	TCAGCGCTCTCTCT
Amn1	GGCCACATTAGGAG
Amn1	GGCACAAAATGTAG
Amn1	GGAGAAGCAGTAAC
Amn1	GAACTACAAGTCCC
Amn1	CGCTGTCCAGGCAA
Amn1	ACAGAGTTGGACCT
Ano2	GCTTCGCTGGGGAC
Ano2	GCAGGGAACTGCCC
Ano2	CTGGGGTCATGCAT
Ano2	CCGCCCCTCGCCAG
Ano2	CCCCAGCGTGTCTC
Ano2	CCCAACTTCCAGAA
Ano2	AGTCTCTGCGAAGG
Ano2	AACTGCCCAGGGAG
Apobec1	tcaaggattttcgg
Apobec1	gggtaaatactaag
Apobec1	ggattttcgggggg
Apobec1	gctccgagggtcag
Apobec1	gcagcactgctccg
Apobec1	gagtcctgcactgc
Apobec1	gaagcggccgaatc
Apobec1	atctcaaggatttt
Apold1	TGCTGCCTTCGGCC
Apold1	GGAGGTCTCAAAAA
Apold1	CAGTAGCTATTCTC
Apold1	CAGGGTATCCCCAC
Apold1	ATGTGACCCATTAA
Apold1	AGGAAGAGAACCAC
Apold1	AGCCTGGGGCATGT
Apold1	ACTTGTTTCAAGTT
Arhgdib	GTGCATGCTGGGGG
Arhgdib	GCTGATCGGAAGAT
Arhgdib	GCACACACAGCTAC
Arhgdib	GACAAGGAAACCCT
Arhgdib	GAATGCTGCTCAGA
Arhgdib	CTTCTGCTCCTCTA
Arhgdib	CGGGGAGAGACATA
Arhgdib	AAAGCCATAATCTC
Arntl2	TTGGGGCTCTGCTG
Arntl2	GTTGTAAAAAGAAA
Arntl2	GGGGAGACCCTTCA
Arntl2	GCCTTGTCCCTCCC
Arntl2	GAAAGACTGGTCTG
Arntl2	CAGTGGCGCTGGAA
Arntl2	CAAGGCACCCGCAC
Arntl2	AAGAGGTGGAGGAC
Art4	TGATAGCCCTGCCC
Art4	GGTGGACCTGTGTC
Art4	GGGCTGCAGATAAT
Art4	CCTGTGCTGCTGGA
Art4	CCCCGTCTCTGAAC
Art4	ATGCGATCTTAAGG
Art4	ATGAAGCGCAGCTG
Art4	ATCATTCCAGGGCA
Atf7ip	GGAAACGGTTGCCC
Atf7ip	GACCTCACGGGCAT
Atf7ip	CAGGTCACTGCAAA
Atf7ip	CACTGCAAAGGGTT
Atf7ip	CAAGCTCAACTTGT
Atf7ip	AGCTAGGACCTCAC
Atf7ip	ACGGGCATGGGAAA
Atf7ip	ACAAGTTGAGCTTG
Atn1	TCGGCCAACTCGCC
Atn1	ggggggcggaggat
Atn1	ggagacgcgaggga
Atn1	gcgcggaggaacgg
Atn1	gcgcgcggcagtcg
Atn1	cggaggagacgcga
Atn1	AGGCAGACCTGGGG
Atn1	agagaggggcccgg
B4galnt3	TGGAGTTATGTGGG
B4galnt3	GTGGGGTGATGATG
B4galnt3	GTCAAGATATTCGA
B4galnt3	GCTTGGAGTTATGT
B4galnt3	CGGTGAGTACGCCA
B4galnt3	CCTGGCGTACTCAC
B4galnt3	CCCCTAGAGAATGA
B4galnt3	AGAGAATGAGGGAA
BC049715	TCCTGGAGTGGACC
BC049715	GGTCAAAAGACCAT
BC049715	GGCTGGTTTAAGAA
BC049715	CGGACCGGACCGGT
BC049715	CGACCGGTCCGGTC
BC049715	CGAAACCATAGCGA
BC049715	AGGCAGAGGCACTA
BC049715	AAACGCAACCCGAC
Bcat1	GGTGGTTGCATCGG
Bcat1	GGCAGGGAACAGCG
Bcat1	GGCACGCGCATAGA
Bcat1	GAGTCCACGTTTCG
Bcat1	CTGCATTTGTGCTT
Bcat1	CTGCAAATCCAGAT
Bcat1	CGAAGCACAAATGC
Bcat1	CCCGCACTTTACTA
Bcl2l14	TGGAGCTGTCTTGA
Bcl2l14	gtgtgcaccaacag
Bcl2l14	GCAGTGAAAGTGTT
Bcl2l14	GACCAGCCAATCCG
Bcl2l14	CTGTTTGTGCCCGG
Bcl2l14	CACCGGGCACAAAC
Bcl2l14	AGGGACTAACGGGA
Bcl2l14	AGCCAATCCGTGGC
Bhlhe41	TCGGGGAAGACGAA
Bhlhe41	GTTCGTCTTCCCCG
Bhlhe41	GTCCAGCCCggagg
Bhlhe41	ggggaCACCTGATT
Bhlhe41	gcgggtgtgcgaga
Bhlhe41	GCCCTGCAGCGCCT
Bhlhe41	GACGAACGGCTCGC
Bhlhe41	AGCCCggagggggg
Bicd1	TGGGAGACTACGGA
Bicd1	GCTGAAGAGGGATG
Bicd1	GAACCGCGCTGAGG
Bicd1	CTGAGGCGGAATGA
Bicd1	CGGAATGAAGGCTG
Bicd1	CCGACTGCTGAAGA
Bicd1	ATGATGGGAGACTA
Bicd1	ACTACGGAGGGCTG
C1ra	TTCAAGGATGGAGG
C1ra	TGGTGGTCCATTTG
C1ra	GCACCGAGGTGTAC
C1ra	GAATTGCAAAAAAG
C1ra	CTGACCATATGTCC
C1ra	ATCTACGATGCCTG
C1ra	AGCCATTCCCCAAA
C1ra	AAAAAGGGGCCAAT
C1rl	TGAGTTGAGACTCT
C1rl	TAATAGCAAGCTGG
C1rl	taaggcggcaggat
C1rl	ggattggcatgatt
C1rl	GCAAAACCTGGACT
C1rl	GAGACTCTGGGTGC
C1rl	CAGCTTGCTATTAG
C1rl	AGAGGAGGCCCTTT
C1s	TGTTTTAAACGCAG
C1s	GCACCAGCTTTGCT
C1s	GATTCATGAATCAA
C1s	GAAGGCTTAACAGG
C1s	CAGCCCAGCAAAGC
C1s	CAAAAGGGGGGAAT
C1s	ATCACACAGAGGGT
C1s	AGGGAAGGCTTAAC
C2cd5	TCTGCCCTGCGGCG
C2cd5	GGGCCATGGGAGAG
C2cd5	gcgcggAGAGGCGT
C2cd5	CTGCAGCACGTCAG
C2cd5	CGGCGCCCTTCCTC
C2cd5	ACCTAACCGACCCG
C2cd5	ACCCAGCCTCGGGT
C2cd5	AAATGGCGGCTCGA
C3ar1	TAAGAGGTGACTCA
C3ar1	gtagctaaggtgac
C3ar1	GGTAAAGGGAACTC
C3ar1	GGAGGAGGCCGATC
C3ar1	CTATCTGACTGCAC
C3ar1	CGGCTAAGTTTAAG
C3ar1	AGGAGGGCGGGTGG
C3ar1	acacacaaatgggg
Cacna1c	TTGGCTCTGATACG
Cacna1c	GTTCAGTTCTACCA
Cacna1c	GTTCACTACTAAAG
Cacna1c	GGGTGTAGCTCTAA
Cacna1c	GCGGTTTCCAATGA
Cacna1c	GATAGCTCCTTCAT
Cacna1c	CGTATCAGAGCCAA
Cacna1c	AGCTATCTCACCAG
Caprin2	GTACCGGAAAAGGG
Caprin2	GCAGAGAGGGGCAC
Caprin2	GAGGGGCACCGGAA
Caprin2	CTAGCGCACGAGAG
Caprin2	CGGGTACCGGAAAA
Caprin2	CAGGCTTGCAGAGA
Caprin2	CACGAGAGGGGAGT
Caprin2	AGGGCGGACTGTGG
Capza3	GTTTTCTTCGAAAG
Capza3	GGCAGCTATTCTAA
Capza3	GAGTCCAAACCCCA
Capza3	CTTCAACTGTCATA
Capza3	CTGCCCCACCCTGG
Capza3	CTAGAGATGTTCCC
Capza3	ATGAGATACAATGA
Capza3	AACTCCACACTGTC
Casc1	TGGGCAGTACTCAC
Casc1	TGGGAGTTGTGAGT
Casc1	GTGTATGGGACTCG
Casc1	GGCGTACCTTATGT
Casc1	CTGCCGGAAGTGGG
Casc1	CATCAGGCGGAAAT
Casc1	AGGCAGCAGTGTAT
Casc1	AAAAGCCGCGATGT
Ccdc77	TGGGAAGTACTGCT
Ccdc77	GCGCAAGGCAAGAT
Ccdc77	CGGCAGAGGTTCCT
Ccdc77	CGCCTCACCGGCAG
Ccdc77	ATGCGTGTGGAGGG
Ccdc77	AGGTAAGTATCCCT
Ccdc77	AGAATGCGTGTGGA
Ccdc77	AACAACCGTCCTAT
Ccdc91	TCAATCCACTTCAC
Ccdc91	GGCCAGTGTATATC
Ccdc91	GCTGAATCTCTGTT
Ccdc91	GAATCTCTGTTAGG
Ccdc91	CTCCAGGCATCCGC
Ccdc91	CCTGACCTGTGAAG
Ccdc91	CATGACCCCCCAAG
Ccdc91	ATGTGATGCGCCCG
Ccnd2	TAGGGGCCTCGGAT
Ccnd2	gggagggacgctag
Ccnd2	GGCCTCGGAGAAGT
Ccnd2	GCCCCTAGCATGCG
Ccnd2	cgctagaggagggg
Ccnd2	ATGCGGGGCTGGAT
Ccnd2	agggacgctagagg
Ccnd2	agggaaagattgaa
Cd163	TCTCCCTTTAAGAT
Cd163	GTTCTTATGGTCTC
Cd163	GTGGCCCTATGTAA
Cd163	GGAGCCAATCTTAA
Cd163	GAGCTCCCAGAGTA
Cd163	CTGTGTTCCAAAGT
Cd163	CGTGGTCCGAGGTA
Cd163	CCTGCGTTAGTTGG
Cd163l1	TGGTGATAGGTTCT
Cd163l1	tgctgccctttctc
Cd163l1	tcTACAAATCTCCA
Cd163l1	gttccaattggaac
Cd163l1	ggtgagtctctggt
Cd163l1	ctgtgtaagagctc
Cd163l1	ATTTCGTGCAGCAT
Cd163l1	agtaggtgagtctc
Cd27	TGCGGAAAAGAGAA
Cd27	GGTCACCTCTGGAA
Cd27	GAGAGGTGCCCAAG
Cd27	GAGAGACTATGAAG
Cd27	CCGGACCTGTTGAT
Cd27	CCAGGGACAGATGA
Cd27	ATCAACAGGTCCGG
Cd27	ACCCCATTAGAGGT
Cd4	GTTTCAGCTTTTTA
Cd4	GTAAGCCAGCCCTC
Cd4	GGAGCCTCACGACC
Cd4	GAGCAGAATCAAGC
Cd4	ATGTCACTATTGTT
Cd4	ATCAAGCTGGAGTC
Cd4	AGCAAGAGTCAACA
Cd4	ACGTTGACCTAACC
Cd69	GAGTACAGGGTAGG
Cd69	CTTTATACTCGATT
Cd69	CTAATCGAGTATAA
Cd69	CATTTCAGACAGCA
Cd69	ATGTCTTCGATTCT
Cd69	AGTTGAGTGAGTAC
Cd69	ACCGTGTGTTGTTG
Cd69	ACAGGGTAGGAGGA
Cd9	GCCCAGGATGAACT
Cd9	GATTAGAGCATGGG
Cd9	GACCCCGAGACGGT
Cd9	GAAGTCGGGTACGG
Cd9	ATGCGCATGTGCGG
Cd9	AGACGGTGGGAAGA
Cd9	AGACGGCAAAAGTT
Cd9	AGAACCTGGGTCTG
Cdca3	TTGCCCTCCGGTGG
Cdca3	TGCCCCGACCCTAT
Cdca3	GGATGTCTATCATG
Cdca3	GGAGCCACCACCGG
Cdca3	GCGGTGGACTTGAT
Cdca3	ATGAGAGTCTGCTT
Cdca3	AATAGGGTCGGGGC
Cdca3	AAGCAGACTCTCAT
Cdkn1b	GTCGCGTGACTACT
Cdkn1b	GGGACCTAGATCCC
Cdkn1b	GCGTGACTACTCGG
Cdkn1b	GCGGCGCTACGGGG
Cdkn1b	GCGCGCTCTTAAGG
Cdkn1b	CGGCCGGAGAGCTG
Cdkn1b	CGCCGCCAGGACAT
Cdkn1b	CAACAAACCTGCTC
Chd4	GTGGGCGGTTGCCC
Chd4	GTGGCGGTAGTGGA
Chd4	GGGGGCGTGGCCAA
Chd4	GAGACCTAAAGAGG
Chd4	CGGGAGACCTAAAG
Chd4	CGCGCGCTCGACGG
Chd4	CCTGAGCGACGAGG
Chd4	CCCCCTCGTCGCTC
Clec12a	TCTCAAATGCTCCC
Clec12a	GTTTCTGCACTGTG
Clec12a	gctccaggtaaaaa
Clec12a	cttgagcctgctca
Clec12a	CAATAAACTGACTG
Clec12a	aTGGTGGTGCACCA
Clec12a	atgaaaaggactat
Clec12a	aacccagttctcag
Clec12b	GCCTGTCCTTGAAA
Clec12b	GCAAGCAAACATTA
Clec12b	GAATGGCCTGAACT
Clec12b	CTCTGCTTGGTATC
Clec12b	CGTTCTAATTCCTA
Clec12b	CAGTAACGATCATG
Clec12b	ACTAGATCCAATAC
Clec12b	ACAAAGGAACAATA
Clec1a	TGAGGGTAGACAGG
Clec1a	GTTAGTCTGGCTGA
Clec1a	GGCATTCTGAATAC
Clec1a	CAGTGCTACTAGGA
Clec1a	ATGCCAAGTTAGTC
Clec1a	AGGCTCAGAGGGGA
Clec1a	AGCAGATACACACA
Clec1a	AAATCGCGTGTTTC
Clec1b	TTCATCTTAACCCT
Clec1b	TGCGTTCTATTGTA
Clec1b	GTTCAGAGATACGT
Clec1b	ATGTTCCGTCCTGA
Clec1b	ATACTCCCTCAGGA
Clec1b	ATAAAGGTACCAGT
Clec1b	AAAGAGTAGATGCG
Clec1b	AAACTCATGGATAA
Clec2d	TTACTGAGGTCACA
Clec2d	TAACAAAATCTCAT
Clec2d	GGAAACGCATTTCA
Clec2d	GCTTGGTTGGCTCA
Clec2d	CGCATTTCAAGGTC
Clec2d	AGATGGCGCCAGTG
Clec2d	ACACTGGCGCCATC
Clec2d	AATGAGATTTTGTT
Clec4a1	TCTCTGGGCCACAG
Clec4a1	GTTTCCCCTGAAAC
Clec4a1	GGATCAGCCCTCTG
Clec4a1	GGACCCTCTTAGAA
Clec4a1	GAGCACCGGTTTCA
Clec4a1	CTGTGGCCTGAACA
Clec4a1	CCATCCCAGGGCTT
Clec4a1	AGGGTCCTTGACCT
Clec4a3	TCAGGAAGACCCAC
Clec4a3	GCGGAGGGTGCCTC
Clec4a3	CCCTGGCCTGCAAA
Clec4a3	ATGCTGGGTAAAGG
Clec4a3	AGTCAAACTCCCTA
Clec4a3	AGGCCTGATTGCGG
Clec4a3	AGGAGGCCTGATTG
Clec4a3	AATCTCAACTCCGT
Clec4d	TTTTTACTGGCTTT
Clec4d	TTTGAGGTAAAATG
Clec4d	TTCTAGTACATTAG
Clec4d	tctagtgacctccc
Clec4d	GCTTGTTACGGCAA
Clec4d	CTGGAAGTTTTTAC
Clec4d	AGGTAAGTGAAAGT
Clec4d	AAGTAGGCTTGTTA
Clec4e	GCCAAAGGAAAATC
Clec4e	GCACATAGTGCCAA
Clec4e	CCAGACCACAAAAG
Clec4e	CAGAGATAATTTAG
Clec4e	CACAAAGGCATGTG
Clec4e	AGTGAGAATTGGCG
Clec4e	AGAATGTGGTACTG
Clec4e	AAGAATTCAGAATG
Clec9a	TTGTAGTTAGGAGT
Clec9a	GTTGGTACAAGAAA
Clec9a	GGTAAAATGCAACA
Clec9a	GCGAATAAAGATAA
Clec9a	gccatgatgggaaa
Clec9a	GCAACAGGGATTAA
Clec9a	CATCTGATACTATG
Clec9a	AAAGTTCCACTTTC
Clstn3	GGTAGAAGATACGA
Clstn3	GGAACCAATGCGAC
Clstn3	CTGCAAGGGGGGGT
Clstn3	CTCCCCAGTCGCAT
Clstn3	CAGAGGAACTGCGG
Clstn3	AGGCAAGGATTGAT
Clstn3	AATTAGAAGACTGA
Clstn3	AAGCAGGAAAGCCA
Cmas	GTACCGAGTGGAGT
Cmas	GCGTGCCCCGGGGC
Cmas	GCCGGCCCCACTGC
Cmas	GCAGGGTGACGGCG
Cmas	GAGTGGAGTCGGCG
Cmas	CGCCATTCAACTAG
Cmas	CCAGGTGAGCTCAG
Cmas	CCACTGCAGGGTGA
Cops7a	TCTCGCGCCTCCCG
Cops7a	GTCACCTCCGGCAG
Cops7a	GCCCCGAGTTCCTG
Cops7a	GAGCGGTGAATGCA
Cops7a	CTGCAGGACAAGGC
Cops7a	CCGCGGTCCGGAAA
Cops7a	CCGCCTCCCGAGAG
Cops7a	ACAGAGCGGAAGAT
Crebl2	TATGGCGGCCGAGG
Crebl2	TAGAGAACACGCAA
Crebl2	GGCCTGAATCAAGA
Crebl2	GCCCCCCTCGGGTT
Crebl2	CGGGAGCCTGTCAT
Crebl2	CGGCCCAACCCGAG
Crebl2	CAGGAAAACAGCCC
Crebl2	CAACCCGAGGGGGG
D6Wsu163e	GGACGGGGACGATG
D6Wsu163e	CGGGGCAGAGAGGA
D6Wsu163e	AATAACTGGAACAA
D6Wsu163e_Rad51ap1	TCGCCTGCCTGAGG
D6Wsu163e_Rad51ap1	GCGTGCTGAAGAGA
D6Wsu163e_Rad51ap1	CGGGCACGCCATCC
D6Wsu163e_Rad51ap1	CGAGCGGTGATTGG
D6Wsu163e_Rad51ap1	AGGCGAGCGGTGAT
Dcp1b	GGGTCCTCTCGCGG
Dcp1b	GGCCGTATTCAAGA
Dcp1b	GCTTCGCTAATCGA
Dcp1b	GCGGTCGATTGAGG
Dcp1b	GCGAAGCCTAGCCC
Dcp1b	GCCGGGTCCTCTCG
Dcp1b	GAAGAGCTCTGCAA
Dcp1b	CTCTGCAAAGGCGT
Ddx11	TGCCGCTCAACCGC
Ddx11	tcacagccatcttt
Ddx11	GGCCCGCGGTTGAG
Ddx11	GCGTGGCCACGTGG
Ddx11	GCGCAGTGGCTCGG
Ddx11	gcaattgcccgaag
Ddx11	AAGCACAAGGCCCG
Ddx11	AAAACTAATATGGA
Ddx47	GGGCAGATACCCAA
Ddx47	GCGCCCCACACAGG
Ddx47	GCAGCGCCCCACAC
Ddx47	CGTCTCAGTTCCTT
Ddx47	CCAGACCCGCCAGC
Ddx47	AGCCTGTGTGCCTA
Ddx47	ACACAGGAGGGACT
Ddx47	AAGTCCCTCCTGTG
Dennd5b	TCAACCGACTGTTG
Dennd5b	GTTCAGTTGACCCG
Dennd5b	GCTCGGAGGATCGG
Dennd5b	GCGGCTGCGCCCGC
Dennd5b	GCCACCGAGCTCTG
Dennd5b	GCACCGTGCAAGAG
Dennd5b	CCGCGGTAATATTG
Dennd5b	CCCGCAGAGCTCGG
Dera	GTAGGGTGATGACC
Dera	GTACAGGACCGAAG
Dera	GGGCGTTGCAAAAG
Dera	GACTTCTGGAGCTG
Dera	GAAAGACAGGGAAC
Dera	CCAAGCCCAGGAGC
Dera	ACAGGGAACAGGTA
Dera	AAGCCACGCCTCTT
Dnm1l	TGAGTGGAACGCGA
Dnm1l	GCCACGACAGAGGT
Dnm1l	GCACCCATTGGGCC
Dnm1l	GACCTGAACTGGGC
Dnm1l	GAACTGGGCGGGTA
Dnm1l	CGAGGAAAGGGCGG
Dnm1l	AGGTGGGCGCGCAA
Dnm1l	ACGCGCCACGACAG
Dppa3	TTAAAGTAGCCTGG
Dppa3	TAAAGGTGTAGCTC
Dppa3	gtcacaaaatggga
Dppa3	ggctgggattgcGC
Dppa3	cctagtcacaaaat
Dppa3	CCGCCTCCGCCTAA
Dppa3	ccctggaactggct
Dppa3	agccagttccaggg
Dusp16	TCGGGTCGCGTACC
Dusp16	GGGCGGGCGATGCG
Dusp16	GCGGATGAGGTCAT
Dusp16	GAGGAGACgggcga
Dusp16	CGGGCCACAGACCC
Dusp16	CCGGGGGGGAAAGG
Dusp16	ATGCCCCCACTCTA
Dusp16	AGCCCGCCTCCCGG
Dyrk4	TCTGATACCAGGAA
Dyrk4	TCATGGATCACCCA
Dyrk4	GGAGAGAGAAAACG
Dyrk4	GCTTACCCCACTTA
Dyrk4	GAGATGTATTCTTT
Dyrk4	GAGAAAACGAGGTT
Dyrk4	CTGCGCCTGGTTGA
Dyrk4	CAGAGTCACAAAAA
Eif2s3x	TTGGGCGGAGCGAA
Eif2s3x	TACGGTATGTCAGG
Eif2s3x	GGGAAGGCGGACTG
Eif2s3x	GGGAAGCGGCGGGA
Eif2s3x	GCCCCTCGAGGGGA
Eif2s3x	GAGCTCCGGCAAGG
Eif2s3x	GAAAGGCCCCTCGA
Eif2s3x	ACGCTCGACCGGAG
Emg1	TCCGCGCACAGGAA
Emg1	GCTCGCGGGAGAAA
Emg1	GCCCGGGCGGAGGG
Emg1_Phb2	TGAACTCCGCGCAC
Emg1_Phb2	GTCCCGCCTCTTGG
Emg1_Phb2	CCGCCTCTTGGTGG
Emg1_Phb2	ACGGAAGCCTCTCC
Emg1_Phb2	ACCAGCGGTCAGGA
Emp1	GGGGCACAAGGGTC
Emp1	GCTAAGTTGGCAGC
Emp1	GAGGGAGCTACAAC
Emp1	CTGCCAACTTAGCA
Emp1	CGGTCAGATGTGGC
Emp1	CAGCCGGTCAGATG
Emp1	CAAAACACAGGTTA
Emp1	ACGCCCTGCTAAGT
Eno2	GTGGGGAACGGAAC
Eno2	GGCTGGGGCGATCC
Eno2	GGCGATCCAGGACC
Eno2	GCGCGGGTGGTGGT
Eno2	GCATGTACGAGCGC
Eno2	CTATAGAGCCGGGA
Eno2	AAGCCCACCCACAG
Eno2	AACGGGTGGGGGAA
Eps8	GTGTAGCAATATGG
Eps8	GGAAGTCTTAGCTG
Eps8	GAGTCTAAGGAACA
Eps8	CTTTACCTCCTCAG
Eps8	CTGGGAGAGTCCAA
Eps8	CCCTTCCCCGAGGT
Eps8	CAGTCCCACCCTCT
Eps8	AAAGCCCTTCCCCG
Erc1	TGGGTGCCGAGGCA
Erc1	tcccagtgggacga
Erc1	GTGGAGCggcgtag
Erc1	gggcgcttcccagt
Erc1	ggcgacagggggtg
Erc1	gctacgccGCTCCA
Erc1	GCGGTCCCGTGGAG
Erc1	aagcccagcggccc
Ergic2	TCCGCACTACAGAC
Ergic2	GGTCAACCTGAAAG
Ergic2	GGGGCGTGGCTACG
Ergic2	CGGGGTCAGGCGGA
Ergic2	CCGGCGCCTTAAGG
Ergic2	CCGAAATGCTGGAG
Ergic2	CACTGCAGCTCAGG
Ergic2	AAGAGCAACTCTCA
Erp27	TGCAGCTGACTCCA
Erp27	TCTTAGGGCCATGT
Erp27	GTAGGTACTCTATG
Erp27	GCCAGAAGGAAGTC
Erp27	CATATCCAGCCAGA
Erp27	CAGTGGAAGAGCTC
Erp27	ACCCGACTTCCTTC
Erp27	AAACGTAAGCTGAG
Etnk1	GGGCTCTTGGGGAT
Etnk1	GCTCGTAAGCGCTC
Etnk1	GCTCGGACTCCTTC
Etnk1	GCGGCACAATGGGC
Etnk1	GCCTCGGGGCTCTT
Etnk1	CGCTACTGTGGGGT
Etnk1	CAACCCCACAGTAG
Etnk1	ACTCCGCTACTGTG
Etv6	GGGTGTGCGGGTCG
Etv6	GGCGAGCACGGCGT
Etv6	GCGGAGAAATCAAA
Etv6	GCAAGGTTCCCCAA
Etv6	GAGACACGCCAGGC
Etv6	CGGGGCGGCCCAGT
Etv6	CGGGCGCAGCAGGC
Etv6	CACGCCGTGCTCGC
Far2	TTGGTGTGCATTGT
Far2	GGCCTGTGCGTCCG
Far2	GCATTGTTGGGTGA
Far2	GAAGGTCGGAGGGA
Far2	CGATGCCATCCTCG
Far2	CATCGCCTGGGCTT
Far2	ACCAGGAAGGTCGG
Far2	ACAGGCCCCGAGGA
Fbxl14	TGCGCCCTAGGAGC
Fbxl14	GTACCACTGAGCGG
Fbxl14	GCGGGGGGACTCTG
Fbxl14	GCGGAGGACGCGGA
Fbxl14	CTGGCCGGCTCCTA
Fbxl14	CGCGGCGAACTCAC
Fbxl14	CGCGCGACTTAGGC
Fbxl14	AGGCCCGATCACGC
Fgd4	TTCCCCTGGGCCAA
Fgd4	TCCCAGGGCGTGGT
Fgd4	GGAGAGTCCGACGA
Fgd4	GCGCTGCAAACTTT
Fgd4	GCCGAAGAGGCTTG
Fgd4	GCCCATTGGCCCAG
Fgd4	CCCGAGCGCCGAAG
Fgd4	CCCCCAAGCCTCTT
Fgf23	GTGTGACATCAAGC
Fgf23	GGCTTGAAATTGAG
Fgf23	GGCGCGTCAGTTCC
Fgf23	GAAGGGTGTTAGGT
Fgf23	CAACAAATGACCCA
Fgf23	AGCCCAGACTTCTT
Fgf23	ACATCATTCACTTA
Fgf23	AAGTGAATGATGTG
Fgf6	TCTCAGAATCCCTG
Fgf6	GGCCGGCTGACGTC
Fgf6	GCATCTCTGCGGGA
Fgf6	CCTGGGGACTGGAG
Fgf6	CCAGGACCCAAATT
Fgf6	AGCTGGAATGACAG
Fgf6	AGCTCACTTACCCA
Fgf6	AGAGAGCATCTCTG
Fgfr1op2	TCGCGTGTTTTCCG
Fgfr1op2	GTTGATTGGAGAAC
Fgfr1op2	GCTTAGTACTTTGT
Fgfr1op2	GCCCGGACTGGAGG
Fgfr1op2	CCGGCCCGGACTGG
Fgfr1op2	CCACCCCCGGTAAA
Fgfr1op2	ACTGGAGGCGGAGA
Fgfr1op2	AAACCTTGAGAGGG
Fkbp4	TGAGGGTACTGGAG
Fkbp4	GGTTAAACGGGTTG
Fkbp4	GGTCCTGGTGTAGG
Fkbp4	GGCGGAACGACATA
Fkbp4	GGAGGGCACTCCTA
Fkbp4	GAGCGGGCTGCAAA
Fkbp4	AGGAGCGGCACGAG
Fkbp4	AGAAGCGGTTAAAC
Foxj2	GGGTCGGCGACCCG
Foxj2	GCGCCGggaggcgg
Foxj2	GCCAGTGCCCGGGA
Foxj2	CTTAGCGTGGACGC
Foxj2	CGACCCTCCGTCCC
Foxj2	CCGGGACGGAGGGT
Foxj2	CAGCGTCCACGCTA
Foxj2	CACAGCACAATGAG
Foxm1	TCGCCAATCGGCAC
Foxm1	GTACGCCACTTCCC
Foxm1	gagggcgggtaagg
Foxm1	cgggagggcgggta
Foxm1	CGAGCGTTCGGGGC
Foxm1	CCGCCCTGCCTCAG
Foxm1	AGGGGTAACCGAGT
Foxm1_Rhno1	cggcggggctcgag
Gabarapl1	TTTTTGCGTTTCGA
Gabarapl1	TTTAGGAAAAGCTT
Gabarapl1	GGCAGGCCAGTCGT
Gabarapl1	GGACCTGCTGGATC
Gabarapl1	CTGCTGGATCCGGG
Gabarapl1	CAAAAACACCAGGG
Gabarapl1	AGGTCCTTAGCGCC
Gabarapl1	AGAAGGAGGAGTTG
Gapdh	TGCGCCCTTGAGCT
Gapdh	TCCGAACTGATAGG
Gapdh	GTCCAAAGAGAGGG
Gapdh	GGCCCAGCTACTCG
Gapdh	GCTCAGGAGGTGAC
Gapdh	GAACCCGGATGGTG
Gapdh	CCCGGATGGTGGGG
Gapdh	AGGCCGGGGACAGT
Gdf3	gagaaacaagttga
Gdf3	GAATTGCCTCTGAG
Gdf3	CTTGATTAGCTCCC
Gdf3	CTTCTACTCCCCGC
Gdf3	CTGACCAACCCGCG
Gdf3	CCTGAATTGAGCAG
Gdf3	CCGCGGGGAGTAGA
Gdf3	CAGCGTGAGTGAAA
Gnb3	TGGCGGACTGACCG
Gnb3	TGGCCCTGACTGAG
Gnb3	GGGAAACAGGCCCG
Gnb3	GGAGGGGAGGTATG
Gnb3	GGAGCCAGAACAGG
Gnb3	GAGGGGTGGGAAAC
Gnb3	GAAATCAGCTGGCA
Gnb3	AGGGCAGCTGGTCG
Golt1b	TGGCTTGTGATTGG
Golt1b	GAGGGATGCGCTCA
Golt1b	CAGCCAATCAGAGA
Golt1b	ATCAGAGAAGGCAA
Golt1b	AGCGCCCACCCTTC
Golt1b	AGAAGCGCAAGCTG
Golt1b_Rec1l	GCCGCCACGTCTTC
Golt1b_Rec1l	AGGCCGCGCTCCAT
Gpr162	TGAAAATCCGGGAT
Gpr162	TCCGGGATGGGGTG
Gpr162	GGGAAACTGGACGG
Gpr162	ggcaaggaaggcgc
Gpr162	ggagcggGCTTCAT
Gpr162	AGTCTTGGGGTCGG
Gpr162	AGCTGGTGTTGTTA
Gpr162	ACACGGTGATGTAT
Gpr19	TTGTCTGGGGAAAG
Gpr19	TCTCGCGTTGTCTG
Gpr19	TAGTCCCGGGACTA
Gpr19	GTCCCGGCTGGCAC
Gpr19	GAAAGAAGATTTAA
Gpr19	CAGGCGCAGGATCT
Gpr19	CACGGGCGGGGCGG
Gpr19	AGAGGTCTTTACGG
Gprc5a	TTCTGACGTCAGGG
Gprc5a	GTGCTTCTGACGTC
Gprc5a	GGTGAACCCAGCTA
Gprc5a	GAACCGAGGGACAA
Gprc5a	CTATAGTGCCCTCA
Gprc5a	CGCCTGGCAGTCTA
Gprc5a	AGAGGGTGAACCGA
Gprc5a	AAGTGCCGCGGAAC
Gprc5d	GAGTGAGGTCCTGC
Gprc5d	GAGGTGTGACTTTA
Gprc5d	CCTTGGCCCGAGAG
Gprc5d	CCTCTCTCGGGCCA
Gprc5d	CAGAGTTTGGGGTA
Gprc5d	CACCAAAGAAATCT
Gprc5d	AGGCCCTGCAGCAA
Gprc5d	AGCCCACTCAGAGA
Grin2b	TTGAGCACGAGCCC
Grin2b	TGCTGGAGGAGATG
Grin2b	GGCTCGTGCTCAAT
Grin2b	ggcgtgagtgtgcg
Grin2b	GGAGGCTCCGCTGC
Grin2b	GCTGCTGACACGTC
Grin2b	gcgcgtgcgcgtcg
Grin2b	AAATGCCCAGTGTG
Gsg1	TGGCGGCGTGCCTG
Gsg1	TGAGGTCTTTCAAT
Gsg1	GGGCGGGGCATCCG
Gsg1	CTGAAGGTTAGGGA
Gsg1	CGCCAGCTTGGGTA
Gsg1	CAACCAGATCACAT
Gsg1	AGGGCTCTCTCCCC
Gsg1	ACCTGGTCTTTCTA
Gucy2c	TGATGTGTCACAAA
Gucy2c	TGATAGATGGAGGT
Gucy2c	GGGTGTATTTTTAT
Gucy2c	GAGCTGCGCATCTG
Gucy2c	GAGCTGATAGATGG
Gucy2c	GACACAATCACCAA
Gucy2c	CGACAGGATTACCA
Gucy2c	CATCACTGGGAAGA
Gys2	TTCTAGATAAGGAG
Gys2	GCTTATTTTGTCAT
Gys2	GCACAGCTAGGCAC
Gys2	CTGGGGTAGACTCT
Gys2	CTGCTTGTGTCTGA
Gys2	CTAGGCACAGGCTG
Gys2	CAGAGTTCTAGATA
Gys2	CACCGTGCAGTCTG
H2afj	TCCTCAAACTTGTT
H2afj	gggcaatcttgtat
H2afj	gctaccctagtgct
H2afj	GAGCTGATTGGGTA
H2afj	ctgaccttaggctc
H2afj	CGCCCGTGACAGGC
H2afj	ATCTGGATGGGCGG
H2afj	AGTTAACTACATCC
Hebp1	TGGGCTCACGTGGG
Hebp1	GTGGGTGGAGTTTG
Hebp1	gcggagggatcctc
Hebp1	GAGCCCAGTCTCCT
Hebp1	GAAGAGGGTGACTA
Hebp1	CGGTGTCGCCCAGT
Hebp1	AGGCGATTGGGGCG
Hebp1	AAGTGGGGTGCTAC
Hist4h4	TTTCAAATGTGCTA
Hist4h4	GGTTTTATGGTTCT
Hist4h4	GGGTTCCTGGAATT
Hist4h4	GAGAGTCTTTTGAG
Hist4h4	CCTCTCCAAATTCC
Hist4h4	CCGAAAGGGTTTTA
Hist4h4	AGCACAAAGAGCCA
Hist4h4	AGAGGGAACCGAAA
Iapp	TCCTGTAGATGAAA
Iapp	GTGATGGCGCATCA
Iapp	GCATCAGGGGCCGT
Iapp	GCAAAGAGAATGCT
Iapp	GAGTGCCTTTGTGT
Iapp	CAGATGGAGCAGGT
Iapp	ACACATTAACACTT
Iapp	AATGACAGTCTCTC
Iffo1	TTGACCCCACTCAT
Iffo1	GTGGCTCCCCGGGA
Iffo1	GGGCAAAGGTCATA
Iffo1	GGGAAGGGCTAGTC
Iffo1	GCTGAACCTTTCCC
Iffo1	CTCAGACCCGGGAA
Iffo1	AGGCCCCATGAGTG
Iffo1	AAAGGTCATAAGGG
Ing4	ttcgagaacagcga
Ing4	TCGGATACATCCGC
Ing4	TAGAATAGTCTCGG
Ing4	GACTGATACACGAC
Ing4	CGGAAGTTCAGGTA
Ing4	CGCCTTATTAAGGG
Ing4	AGATGACCGTGAAT
Ing4	AAGGGCGGAAGTTC
Ipo8	GTGCAGCACGCCAG
Ipo8	GTCGGGGGGAAGGA
Ipo8	CGGCCGCCATGATG
Ipo8	CCGGCTGTCGTAAA
Ipo8	CATTCATTGCACAG
Ipo8	CATCATGGCGTCTC
Ipo8	CAGCCGGTGGGAGG
Ipo8	ATGATGCTCGTCTC
Iqsec3	GGGCGTAGGAGAGG
Iqsec3	CTCTGGGCTTCGTG
Iqsec3	CGGGGGCGTAGGAG
Iqsec3	CCCTGCTTCCCGCG
Iqsec3	CCCCGCGGGAAGCA
Iqsec3	CCAAGCAGAAGCGC
Iqsec3	AGGAGAGGCGGGTG
Iqsec3	ACGAAGCCCAGAGG
Itfg2	TTACTATGACCCGA
Itfg2	TGACTTGATACCTG
Itfg2	TCCCCTAAGGTTAG
Itfg2	TCAGACCATCCCTC
Itfg2	TATGACCCGAGGGA
Itfg2	ctaggaatcttccc
Itfg2	CGCCTCCTCCCCTA
Itfg2	cgagcaccatgtcg
Itpr2	TGGCCGCTTCGGGG
Itpr2	TAGAGGCTCCGCTC
Itpr2	ggggagaagccccg
Itpr2	GGGCGGCGCTGCGG
Itpr2	gggcCAGTTCTCGG
Itpr2	GGGCCACCCCGAAG
Itpr2	gcggggcCAGTTCT
Itpr2	CAGGACAGAGGCGT
Kcna1	TGGGATCCTTCTAG
Kcna1	TCTAGAAGGATCCC
Kcna1	TCCTGGCTCTATTG
Kcna1	GGTTAGGAATCCGG
Kcna1	GGCTAGTAAGGCAG
Kcna1	CCGCGGTGGTGCGA
Kcna1	CAGGGGCCTCTAGA
Kcna1	CAGCATTCCTTTCA
Kcna5	tgcctcagtagaat
Kcna5	GTTGGAGTTGTCTG
Kcna5	ctagaggatgattg
Kcna5	ccagacttgagctt
Kcna5	cagtagaataggca
Kcna5	AGACAACTCCAACA
Kcna5	aaggtgacgactag
Kcna5	AAAAGGGTAGACCT
Kcna6	TGCCAGGAGAGCGC
Kcna6	GCTTGGTTGGGGTG
Kcna6	GCGGGAAAGATTAC
Kcna6	GCCCGGGAAGGCCC
Kcna6	CCTTACCCAGTCAG
Kcna6	CCCTGACTGGGTAA
Kcna6	CCAGGGCGATTCCG
Kcna6	AAAGATTACTGGGG
Kcnj8	TGGCCCCAGCTAGG
Kcnj8	GGAGGGACCACCGG
Kcnj8	GGAAGATGAGGGTT
Kcnj8	GCGTCAGTGAACTT
Kcnj8	GCCGGGGAAAGTGG
Kcnj8	GAAAGTGGAGGCGG
Kcnj8	CCGGGCCACGGGGA
Kcnj8	CCGGCTCCCCCGAC
Kdm5a	TCGAGGAGAGGCGA
Kdm5a	GTGGCTAGTCGGCC
Kdm5a	GGTGGGCCCCTCCG
Kdm5a	GGGACACGAACGCA
Kdm5a	CGGCCGACTAGCCA
Kdm5a	CCTCCGTGGCTAGT
Kdm5a	CCGGGGTGGACGGA
Kdm5a	AGAACGAACAAACC
Klhl42	GTGTGACGCACCGG
Klhl42	GGCGTGTGACGCAC
Klhl42	GGCCGTTTACTCGG
Klhl42	ggagaaatgcacag
Klhl42	GCCGGGCTCGGCGG
Klhl42	GCCCTCCGAGTAAA
Klhl42	ctgcattgtagcgg
Klhl42	cggcggcggAAGGA
Klrb1	TTGCAAATGTGAGT
Klrb1	TGACATTTGCCTTG
Klrb1	CATTATGCTCTCTG
Klrb1	CATAATGTTGATAG
Klrb1	ATGTCAGTGTAAAT
Klrb1	ACATTTAATATCTT
Klrb1	AAGGTGTGGAATGT
Klrb1	AAAGATATTAAATG
Klrc1	TATTCATTGTCCAA
Klrc1	TACACAATCTGATG
Klrc1	TAACACCATGAAAT
Klrc1	GGCAACAACTTAAT
Klrc1	GAATACGAGTGCTG
Klrc1	GAAACAGGTTGGAA
Klrc1	ATGAATTTCAGAGA
Klrc1	AAATATTTTTGATA
Klrc2	TGACGCAATAAAAA
Klrc2	TAAATGTTGGAAAA
Klrc2	GCTATTATAAATGT
Klrc2	CTTTTTATTGCGTC
Klrc2	AATGAAAAAAAATT
Klrc2_Klrc3	GATCTCAAAATCCA
Klrc2_Klrc3	AATTACAAAAAGTG
Klrc2_Klrc3	GGAGACCAAAGAAT
Klrc3	TGTGTTCTATGCTG
Klrc3	CTGACACAATAAAA
Klrc3	CACAATAAAAAGGG
Klrc3	ATGAAAAAAAAATT
Klrc3	AAGCGCCAATTCTT
Klrd1	TTTGAACAAGACCC
Klrd1	TGTGCAGTGGTTCC
Klrd1	GTAAGCATTAAAAG
Klrd1	GAATCATCTGTTGG
Klrd1	CAGCAAAATAAGGT
Klrd1	CACAGATGCACAGT
Klrd1	CAAAATAAGGTTGG
Klrd1	ATTGAATCATCTGT
Klrg1	TGTGGGCTGTAAGT
Klrg1	TGGGATGAAGAAAT
Klrg1	TGATTCAGGTTCGA
Klrg1	GAGGTGTGCTGCAG
Klrg1	GAGAAACACCCATG
Klrg1	CTGTCTCTTGTAGA
Klrg1	AGGAGCAATCTCCG
Klrg1	AAAGTAGTGCAAGT
Klrk1	TTTTTACTTGGTGA
Klrk1	TCATCCAAGACAGG
Klrk1	GACAGATTcggaag
Klrk1	ATTTAATATTTTTA
Klrk1	ATTGTTACATTGAG
Klrk1	AGCTCATCCAAGAC
Klrk1	AATTCCCCCTGTCT
Klrk1	AATTAGGACAGATT
Kras	GTCGGGGTCCGCGT
Kras	GGGTGGTGCCGAGA
Kras	GCGGCGGCCAGGAc
Kras	gcccgggcccgTCC
Kras	GCCAGCCCCGGGTC
Kras	cGCGCGCGCGGCCG
Kras	CCGAGCGCATCGAT
Kras	CAGGAGAGCGAGGG
Lag3	TGGAAAGTGTGAGG
Lag3	GCCTTGGTCTGGGG
Lag3	GAGGAAGTAAACAA
Lag3	GAGACCCGAGTCTG
Lag3	CGCGCCTTGGTCTG
Lag3	CCTCCTCTCGGTGG
Lag3	AGCCCTCCTCTCGG
Lag3	AAGAGGGGGCGGTA
Ldhb	GTCACCTTCCGCTG
Ldhb	GATAGACCCGTCTC
Ldhb	CTCTCTAAAGTTAG
Ldhb	CTCTAAAGTGGAGC
Ldhb	CTAACTTTAGAGAG
Ldhb	ACAGAAGGCCAGAG
Ldhb	AATAAGTGCCTCAG
Ldhb	AAGGCCAGAGAGGC
Lmo3	TTTTGCACTTTCCG
Lmo3	GGGCATTTTGGAAT
Lmo3	GAGTCCTGGAGGTA
Lmo3	CTGGATCTGTCTCG
Lmo3	CACGAGACAGATCC
Lmo3	CAAGCTAGCGAGCA
Lmo3	ACTTGACTGAGCTG
Lmo3	AAAGGAGAAGGGTA
Lpar5	TAACTCTGCAACTA
Lpar5	GGTTGGGTGAGTGC
Lpar5	GGTTGGATTTTCAC
Lpar5	CTGTGGGGTTGGTT
Lpar5	CTCTTTGACTCTGT
Lpar5	CAAGCTCTAAAAGC
Lpar5	AGGTATCAGTGGGT
Lpar5	AGCTGACCCAAGAG
Lpcat3	GTGACAGTACAACT
Lpcat3	GTAGGAAGAGGGCG
Lpcat3	GCCGAGCGTTTGTA
Lpcat3	GAGCGCAGCAAGGT
Lpcat3	CGCTGCCTTCCCAT
Lpcat3	CCGGCCGGAATTGG
Lpcat3	ACTCCCGTGAGGAA
Lpcat3	ACCAATAATCGGGT
Lrmp	TATTCAATTGTCCC
Lrmp	TAGAGCCAGGGGTC
Lrmp	GGCCTCCGGACCCC
Lrmp	GCGCAAGGGTGCAG
Lrmp	GCAGAGGAAGTGCA
Lrmp	AGTGCAGGGCGCAA
Lrmp	AGCCAGGGGTCCGG
Lrmp	ACCTTCTTCCTAGT
Lrp6	GGCTCAACCCGCGG
Lrp6	GGAAAGAATCCCAT
Lrp6	GCGTGAGGCGACGT
Lrp6	gcgcgcggcggtcg
Lrp6	gcgcgccgACTCCC
Lrp6	GCGCAGGGAGACGG
Lrp6	cTGAGGACGGGGGT
Lrp6	cgcgcTGAGGACGG
Lrrc23	TTCTCCTGGTTCCT
Lrrc23	TGAGGGTGGAAAGA
Lrrc23	TGAGCTACCCGCTG
Lrrc23	GTTGCCAGGTTACG
Lrrc23	GCTCAGTAGTTGCC
Lrrc23	GAGTTAATTGTCGG
Lrrc23	AAGGAGTTAATTGT
Lrrc23	AAAGAGGGGCGTTA
Lrtm2	GTACCTGTAGTCTG
Lrtm2	GGGCGCATCTGCGA
Lrtm2	GGCAGGACCTTCCA
Lrtm2	GGAGCGGCCATCTC
Lrtm2	GCATCTGCGATGGC
Lrtm2	CTGTACCCCTTGGA
Lrtm2	AGGAGAGCGTTTGT
Lrtm2	AAGACAGACCGAAG
Ltbr	GGGGATTGCGGATT
Ltbr	GCCTCGACGCAGGG
Ltbr	GACGCAGGGCGGGA
Ltbr	CTCAGAGGGGATTG
Ltbr	CGACGTgcccccgg
Ltbr	CAGCCGCCAGGCTT
Ltbr	CAATCGCGACGGGG
Ltbr	AGGCTTCCGAAGAA
M6pr	TGATTGGAGTTGAT
M6pr	TGACCGCAGAACCT
M6pr	GTGAGGGCGATCTG
M6pr	GTCTTCAGACCTAT
M6pr	GCTCCTCATCCACG
M6pr	GAAGACAGTACGTG
M6pr	CCGCGGAGTCTAGT
M6pr	AATCTCCGAGTGAT
Magohb	TGGTTCAGCGGAGA
Magohb	GGGCGCGTTTACTC
Magohb	GCTCGAGATCGTGG
Magohb	GCGTTTACTCCGGT
Magohb	CTTCAGTTCTCTTG
Magohb	CTGAAGGTTCGCAT
Magohb	CCGGAAAACTGAAG
Magohb	AAGCGCGTCACCAA
Mansc1	TGCTGGGGATCTGG
Mansc1	GTGCCGCTCGGCCG
Mansc1	GCGGGAGTACACCT
Mansc1	GAGGATTGACTCTC
Mansc1	CGGTTTAAGACCCT
Mansc1	CGGCTGGGGCGGTC
Mansc1	CGGAGCTGCTTCCC
Mansc1	AGAGCCACTAGAGG
Mansc4	TGTCCAGAAAGTTT
Mansc4	TGCTGCTTTCTCTC
Mansc4	TGCTAGGGCTGCAA
Mansc4	TCCCGGGGCCCAGC
Mansc4	GGGCCCAGCTGGAA
Mansc4	CTTCAAAAGAGCAA
Mansc4	CCTTGCTCTTTTGA
Mansc4	CCAGCACTCTCCCG
Med21	GGCCTGCTGACGTC
Med21	GGAGGGACGCGTGC
Med21	GGAAGGCCTGTGAT
Med21	GCGGGTGGGATCCA
Med21	GCGGGGCCAGCCTG
Med21	GACGTCAGGCGGGT
Med21	CTGCTGACGTCAGG
Med21	CACCTTCCCTTCAC
Mfap5	GTGGTCATAACCTT
Mfap5	GGCTGGAATGAGAA
Mfap5	GCAGTGTTACAATA
Mfap5	GAGCATGCTTGGGG
Mfap5	CCCTGGCCCTTCGA
Mfap5	AGTGGACTGATGAA
Mfap5	AGGGGTGGACACAG
Mfap5	ACTGCTCCCTCGAA
Mgp	TTGTGCCCGGGGTC
Mgp	TCACAAACATAGGG
Mgp	GTGTAGATACTATC
Mgp	GGCTCACAAACATA
Mgp	GGCCTGGAAGTGGA
Mgp	GGAACCGGCGGGAG
Mgp	CAAGGGTTCAGTGG
Mgp	AGATACTATCTGGA
Mgst1	TTGGCCATTACTGT
Mgst1	TTCTGTTCCGGCTC
Mgst1	TGGCAGTTCTGTTC
Mgst1	TCGGGGCGATTCAG
Mgst1	GCACGGTCAGGAGG
Mgst1	GCACAGGTGTAAAC
Mgst1	GAAACTGCTGTGGC
Mgst1	CCCCGAAACTGCTG
Mlf2	TGGCTCGGGGATCT
Mlf2	GGGTCCTCTGGGGC
Mlf2	GGGGGCGATCGGTG
Mlf2	GGGGATCTGGGGAC
Mlf2	GGACCCGCCCTCCG
Mlf2	GAGCGGAATCGGGA
Mlf2	CCTGCAAAGGTGGG
Mlf2	AGGTGTCATTAAGC
Mrpl51	TGTGAGGGAAGTGG
Mrpl51	GTGTTTGTTGTCGC
Mrpl51	GTCCTCAACTGTGA
Mrpl51	GGCCGGAACTTGGA
Mrpl51	GACGCGCAAGGGAC
Mrpl51	CCGTTGTCTCTCCG
Mrpl51	ACATGGTTAAAAGC
Mrpl51_Ncapd2	CCGCGGAGAGACAA
Mrps35	GTTGTGGAATGATG
Mrps35	GTGTAACCTGGGAA
Mrps35	GGAGCTGTGGCTCT
Mrps35	GGAAGTGTGTAACC
Mrps35	gcggacatggagtt
Mrps35	gcagtgagcaatac
Mrps35	CAGTCTACGTCTAC
Mrps35	AGAGCACTGGGCAA
Nanog	TGCCTGGGAGAATA
Nanog	TGACCCAGACTGGG
Nanog	GTTTCAGGTCAAGT
Nanog	GTTGGCCTTCAGAT
Nanog	GGGAGAATAGGGGG
Nanog	CCGCCTGGGTGCCT
Nanog	AAGGTGACCCAGAC
Nanog	AACTGTGAATTCAC
Ncapd2	TGTTCAAACCTCAA
Ncapd2	GGCCAATCCGCGGC
Ncapd2	GCCAATCGCGACAG
Ncapd2	GACGCCTGGCGCTG
Ncapd2	CCTGGCAGCCGTTG
Ncapd2	CCCGGGGCTGTGAT
Ncapd2	AAAGCGCAGACTCG
Ndufa9	TACAGTCCCGGTTT
Ndufa9	CTGCAGGGGTAAGA
Ndufa9	CCCGGTTTTGGAAT
Ndufa9	ACTGGGAACGGAAG
Ndufa9	ACGCCAACTGGGAA
Ndufa9	AAGGGCATGCAAAA
Ndufa9	AAGGAGTTGCACGG
Ndufa9	AAAAAGGTGTAATA
Necap1	GTAACGGCAAAGAC
Necap1	GGCTGAGACGCCGA
Necap1	gcctgccaaggcct
Necap1	CGGGTACAGCTTCG
Necap1	cccgaggccttggc
Necap1	ccaaggcctcgggt
Necap1	ccaacccgaggcct
Necap1	aagagcccaacccg
Ninj2	TTATGGCTCTTCTG
Ninj2	TGTGGCATATTGAG
Ninj2	TGGCTGGGATTCGA
Ninj2	CCATCTGAGGTGAC
Ninj2	CCAGTCACCTCAGA
Ninj2	CATGTCTTGGGATT
Ninj2	AGGTCACCAATCGT
Ninj2	AGGGACAACTCAAA
Nop2	TCGGGAGTAGCGGG
Nop2	GGGTCCGGAGGGGA
Nop2	GGCTAAGGCAATTA
Nop2	GAGGGTTACCTCTA
Nop2	cgatgccactagat
Nop2	CCGCGGTTCAGAGA
Nop2	CCCCGCGATCTTGC
Nop2	ACGCCCCTCACCCG
Nrip2	TTCAGCGTCTAACA
Nrip2	TGTAAACTGTCAGG
Nrip2	TCAGAGACTGGAAG
Nrip2	GTGCCATTGTGTGG
Nrip2	CTGCTCAGAGTGGG
Nrip2	CTCCCTCTCCTTTA
Nrip2	AGGGAAGATCTCAG
Nrip2	AAACCCAGCCCTAA
Ntf3	GGAGCCATCTGGCC
Ntf3	GCTTGGCGCGGAAG
Ntf3	GCGGGCGGGGCTAG
Ntf3	CTGCAAGTCACTGC
Ntf3	CTAGTCCACTTCAA
Ntf3	CTAGGTCTTCCCAT
Ntf3	CCGCAGTGACTTGC
Ntf3	CCATCTGGCCGGGT
Olr1	TGTTTCTTAGTGAA
Olr1	TCATGAAGCATGAC
Olr1	TCAACCGTCGCGGG
Olr1	GGTTGTGTCTCTTG
Olr1	GACTCAACCGTCGC
Olr1	CGTCGCGGGAGGAA
Olr1	AGAAACAGACAGCA
Olr1	ACCACGACAATTAT
Parp11	TCGCTCCGCCTCTA
Parp11	GTGGGTATGATGGC
Parp11	GTCGGGAGGTTCGA
Parp11	GGACCGCCACTGAT
Parp11	GCGCGGAAGTTCCA
Parp11	GAGCGAGTTTGCGG
Parp11	CGTGGTGGGTATGA
Parp11	CGCGACAGCACGCG
Pde3a	TCGGCGCTGTGCGC
Pde3a	GGCGGGGAGGTCGG
Pde3a	GCCGAGGAGAGTTG
Pde3a	GAGTGGGACGGGTG
Pde3a	GAGCACCTCCCCGA
Pde3a	CAGCAGCACGGACA
Pde3a	agtcggagggagtg
Pde3a	AGCCGGAGCCCCGA
Pde6h	TGGGCTTAAGTGGC
Pde6h	TCTTCTCGCAGTGA
Pde6h	GGAGTTGTCTGATA
Pde6h	GATGCAAGGAAGGT
Pde6h	CAGGGCAGATGTTC
Pde6h	ATGCCCCTGTCATT
Pde6h	AAGCCTATGACGCT
Pde6h	AAGCCCAGCGTCAT
Pex5	TTGCGCAGCGTGAT
Pex5	GGACAGTTGGATTG
Pex5	GGAAACGGGTAAAG
Pex5	GCGGCCCAGCTCAA
Pex5	GCCGAGATCCTTAA
Pex5	CGCAGCGTGATGGG
Pex5	CAGCTCAACGGAAA
Pex5	CAATCCAACTGTCC
Phb2	TGTAAGCTGGAGCG
Phb2	TGGCGATGCCCGTA
Phb2	AGGACGAGTGGTGA
Phc1	GGGAGGTGCTTCCG
Phc1	gccggaggaggggt
Phc1	Gccgacccctcctc
Phc1	gccccTCCAGGAAG
Phc1	CCGACAGGAAGCGA
Phc1	cccTCGCTTCCTGT
Phc1	CAACGGGCGCCGAC
Phc1	Agggacgcgcgcga
Pianp	tcggctgggttcgg
Pianp	GTGAAGCTGCGCTT
Pianp	GGACCAAAGAGGGG
Pianp	GCGTAGCAAACGAA
Pianp	GCGCTTAGGTAGAG
Pianp	GACGTGAGAAGGAG
Pianp	CTACAGACGTGAGA
Pianp	Cgctcgcttcggct
Pik3c2g	GTTAAGTTACAATA
Pik3c2g	GGGGGCCATGTTGA
Pik3c2g	GGGATCAGTACATA
Pik3c2g	GGCCATGTTGAGGG
Pik3c2g	GGAAGATGCTGTAA
Pik3c2g	CTTCAGATTATCGG
Pik3c2g	CCCCGATAATCTGA
Pik3c2g	ACATAGGGATGTGA
Pkp2	TGCACCTGTCCTAA
Pkp2	GTGCTCGCCCCGGG
Pkp2	GTCCCCTAAGGGCC
Pkp2	GGCGCACTCCGCCC
Pkp2	GGACCCAGGCCCTT
Pkp2	GCCGAGAATACGTG
Pkp2	GAGCACGTCCTCTG
Pkp2	AGCCGCAGAGGCGT
Plbd1	TGTAGCAGAGGATA
Plbd1	GCCTCCTGGAGGGT
Plbd1	GCATGCCTCCCCGT
Plbd1	GAGCTGATTCACGC
Plbd1	AGGGTCAGACCAGA
Plbd1	ACAAAGCTAAGGTC
Plbd1	AAGGAATCAGTTAA
Plbd1	AAGCAGCACAGCCC
Plcz1	TGGTCTATGAAGAA
Plcz1	TGAAGGGTGCTCAC
Plcz1	GTAACACCTTGAAT
Plcz1	GGACTAAGAGCCTG
Plcz1	CGCACTCACCCTGA
Plcz1	AGAAAACGGTCCAT
Plcz1	ACCTTGCCCATTCA
Plcz1	ACAGAGATCGTCAA
Plekha5	GGACTCAgccgggg
Plekha5	GCGGGACCCGACCC
Plekha5	GCGCGAAGGTTCCG
Plekha5	gccccggcTGAGTC
Plekha5	CTCGGCATCCTccg
Plekha5	cggAGGATGCCGAG
Plekha5	cctaccccctcggg
Plekha5	CCGCCCGGAGGGCT
Plekhg6	GTGTACGGAGAGTC
Plekhg6	GGACAGAGAGGGTA
Plekhg6	GAGTGCTCACTTCT
Plekhg6	CTGGGGTTGGTGTA
Plekhg6	CGCCAGGGTAATGA
Plekhg6	CCTGGTCGGGGCCA
Plekhg6	CACCCGGACAGAGA
Plekhg6	AGGTGCAAAAGAAA
Ppfibp1	GGCTGGTTCCCGCC
Ppfibp1	GCCCGGCCAATCAG
Ppfibp1	GCCCCAGGGGCGGA
Ppfibp1	CGGTCACTCCGAGG
Ppfibp1	CGCTGCGGTCCGTA
Ppfibp1	AGGGCGCGGATAAA
Ppfibp1	ACCAGGCGCCGCCT
Ppfibp1	ACCAGCCCCAGGGG
Prb1	ttggtgggatcaca
Prb1	tcacagggacccag
Prb1	tagagaggaaaacc
Prb1	gttttcctctctac
Prb1	gtgatcccaccaat
Prb1	ggaagtagggcatt
Prb1	attggggagagtat
Prb1	atgggagtgtttgt
Prh1	TTTTTCTGACCAGT
Prh1	TTAAGCTATCCTAC
Prh1	GTTTTTTTCTAGTA
Prh1	GTGTCAGTGTGCAT
Prh1	GGCTTAGTATGTTA
Prh1	GACCATATTAAATT
Prh1	CGTATAAACGACAG
Prh1	AACCCAGATATTGA
Prmt8	TGGCGCGGGGGCTA
Prmt8	TCGACCGGGTGGGG
Prmt8	GTGGGTGTCTGGAT
Prmt8	GGGGCGTAGACATT
Prmt8	GCGGTCCCGGGCAC
Prmt8	CTCCAGCAGCCTCG
Prmt8	AGGAATCGACCGGG
Prmt8	ACAAGACTCAGCCA
Pthlh	TTCCGGCAGCGGGG
Pthlh	TGTCGTGGATGCGA
Pthlh	TGCAACTTGTTCAA
Pthlh	GGGGCGGCGCAGGT
Pthlh	GCGGGTTCCGGCAG
Pthlh	GCGGGCCAGGACTG
Pthlh	GCGAGGGCGGGTTC
Pthlh	GAGTCGCAAAGAGG
Ptms	GGCAGGCGAGAGCg
Ptms	ggacgagaccgggc
Ptms	gcgggaggacgatg
Ptms	gcgagcgggacagg
Ptms	gaggatgaaagcga
Ptms	CAGCGGCTGGTCGG
Ptms	atgaaagcgaaggg
Ptms	agagactgacggtt
Ptpn6	TGGGGCAGCCAGCA
Ptpn6	GTAAGGCACACGTG
Ptpn6	GGCGGAGACAGGAA
Ptpn6	GGCCGACCCCTTAG
Ptpn6	GGCACACGTGTGGC
Ptpn6	GAAGAGGAGCTGGA
Ptpn6	ctgtaactcacagg
Ptpn6	CAGTCTGCCAACAA
Ptpro	TTGAACTGAGGTCG
Ptpro	GCGGAGCCTGGTCT
Ptpro	GCAAAGGAACGGGG
Ptpro	CTCTCTCTTATCTC
Ptpro	CAGGGGTCGGCGTG
Ptpro	CAGCCCCCCAGACC
Ptpro	CAGACAACCCTCCG
Ptpro	AAACAACTCTTCCT
Pyroxd1	TACAGAATAAGAAG
Pyroxd1	GGCGTGGTAACAGC
Pyroxd1	GGAGGCAGACTTTC
Pyroxd1	GCAGCGTCTCTTCC
Pyroxd1	CGGAAGTGATTTGT
Pyroxd1	CACATCTTGAACTC
Pyroxd1	ATGAAAGTCCCCTA
Pyroxd1	AGAGTTCAAGATGT
Pzp	TCTTTCAAACATTT
Pzp	GGTTAATAATACAC
Pzp	Gccaagttagactt
Pzp	CTGCCACTAGCTCA
Pzp	CCTAGAAAATGGTC
Pzp	CCAGACCATTTTCT
Pzp	ATAGTCCTAGAAAA
Pzp	AAGATGGTGCTTGC
Rad51ap1	TGGAGCGCGACGTC
Rad51ap1	CGGTGTGTGTGCGC
Rad51ap1	AGGATGGCGTGCCC
Rad52	TCGCAGGGCGCCTA
Rad52	TACGGAAACCGAAG
Rad52	GGGCGTCACCCAGC
Rad52	GCTTCGGTTTCCGT
Rad52	GCCGGGTCACACCA
Rad52	GAAGCGGCTTGCTG
Rad52	CAGGGACCCTCGCA
Rad52	AGGCTGATCGCCGC
Rassf8	TTCAGAGGTGACGG
Rassf8	GGTGGTGGAGAGCC
Rassf8	GCCTCCCCGACTGG
Rassf8	GCCGGGAGAGTAGC
Rassf8	GCCAGCTACTCTCC
Rassf8	GCACCCCACCAGTC
Rassf8	CCCACCAGTCGGGG
Rassf8	CAGTCGGGGAGGCC
Recql	TGCGAAGCCTGGTC
Recql	GGCTCGGGCCCGGG
Recql	GCGGCCTTGCGGCC
Recql	CCGGAGAAGAGCCT
Recql	CCGAGGCTCTTCTC
Recql	CACGCTGCGAAGCC
Rep15	TCCAGGTTATGTAC
Rep15	GGCTTTAACAGATG
Rep15	CCCGTTTGTCAACT
Rep15	AGCACGTGAATGTA
Rep15	AGATGCGTCAAAAA
Rep15	AAGCTTAGAGACAT
Rep15	AACCTGCCTGGGGA
Rep15	AAACATGTGAGGGA
Rerg	TGCTAATACGCCCT
Rerg	TGAACACATTCCCA
Rerg	GCTGGGAGAAAATC
Rerg	GCGGAGCGCAGCGG
Rerg	GACTGGTCCAGCAG
Rerg	GACTAGTAAATGGC
Rerg	CTGCAGCATCTTGG
Rerg	CCAAGACTAGTAAA
Rergl	tggtggaaatcatc
Rergl	TCTTGATTCTCCAG
Rergl	GATAGTCTAAAAAT
Rergl	ctggaagcaactgg
Rergl	CATTCATAATCCTC
Rergl	AGAGGATTATGAAT
Rergl	AAATACATAACCAT
Rergl	AAAACGTTTGCTTT
Rhno1	gggcggggtgacgg
Rhno1	GGAGGGCTCGGAGT
Rhno1	gcgTGGAGCAGACG
Rhno1	GCGGGACCCAcccc
Rhno1	gcggcgggtcccgg
Rhno1	ccgggctcccaccc
Rhno1	CCCAcccccggccc
Rimklb	TCCTCGCAGGTGTC
Rimklb	GGCTACCCCTCCGG
Rimklb	GGAAAACGGGTAGG
Rimklb	GCCCCGCCGCCGGA
Rimklb	CGCGGCTACCCCTC
Rimklb	CGCGCGCTCGCGAA
Rimklb	CCTGGAAAACGGGT
Rimklb	CCGCAGCCCAAGGA
Scnn1a	TAGGGGCAGAAGAC
Scnn1a	GTCGGCCACGGGCA
Scnn1a	GGGAGGATCGGAGG
Scnn1a	GGATCGCCGAGAGT
Scnn1a	GCCACGGGCAAGGA
Scnn1a	GAGGAGTCTGGTCT
Scnn1a	GAAAAAGAGACTAG
Scnn1a	CTGGGAGCTCTCCA
Slc15a5	TGCACCAAAGTTCT
Slc15a5	TAAACTGGAAGCGG
Slc15a5	GCATACATGCCCAA
Slc15a5	GAGTGAAGCCACAA
Slc15a5	GAGAAGAGAACCTG
Slc15a5	CATGCAGACCAGTC
Slc15a5	AGTCAGGAGGACAT
Slc15a5	AAATCGAGAAGCAA
Slc2a3	TCTTGAAAAGGGGA
Slc2a3	GTGGTTGATTGCAA
Slc2a3	GCATCCAGGTGTGA
Slc2a3	GATTGCAAAGGACA
Slc2a3	GAAGATCAGATAAG
Slc2a3	CGGCTCTTGAAAAG
Slc2a3	ATGTGGTAAAAAGC
Slc2a3	AAGGACAGGGGCTG
Slc6a12	TCTGATTGGGAGGG
Slc6a12	GTGGTCTCTAAGTA
Slc6a12	GTAAACATGGGAGC
Slc6a12	GGTCTCTGATTGGG
Slc6a12	GGCCTGGTAAACAT
Slc6a12	GCCAATCTTGTCCT
Slc6a12	CTGTAGGCTTTCAA
Slc6a12	CATGGAAGTTTCGG
Slc6a13	GGGGAGAACGTGGG
Slc6a13	gctagggacggctg
Slc6a13	GAGAACGTGGGAGG
Slc6a13	GAATCACTCATGTG
Slc6a13	CGGCTGAACTGCCA
Slc6a13	CCTGGCAGTTCAGC
Slc6a13	CAACCTACATTCTG
Slc6a13	AGGAGGCGGAATGT
Slco1a5	GTCTACACTCTGCA
Slco1a5	GCACGGAGGACCTG
Slco1a5	GAAGCCACATTTGA
Slco1a5	CCCCGCACACCCTC
Slco1a5	CAAGTGGCTAATCT
Slco1a5	CAAATAAATCAGGA
Slco1a5	AAATCAGGAGGGAG
Slco1a5	AAACCAAATAAATC
Slco1b2	TGCTTTTAAGTAGT
Slco1b2	TCATCCAATTGTAT
Slco1b2	ggtgcaggctcacg
Slco1b2	GCAACCAATACAAT
Slco1b2	GAGAGGCTTTAAAG
Slco1b2	GAAAAAAAGCAGAG
Slco1b2	ACAAAGATCTAGGT
Slco1b2	AAAGTTTGTTATTT
Slco1c1	GTCTGCAGGGAATT
Slco1c1	GGGCACCCTGGCAA
Slco1c1	GCTGGAAGACTGAT
Slco1c1	GCTCATAGGGTGTG
Slco1c1	GAAGACTGATTGGA
Slco1c1	CTAAGGGACATCAA
Slco1c1	AAGCCCAATGGTGA
Slco1c1	AAACACCATTCCAC
Smco2	TTAGAGCTAGGCAG
Smco2	TCCCTCCCCTGAGA
Smco2	GTCAAAAGACAGTG
Smco2	GCACACAGTGACCT
Smco2	GAGGAGAAACCAGA
Smco2	CTGAGGCCAGTTGA
Smco2	AGGGTCAGAGCCAT
Smco2	AGGCCTTGGAGCAT
Smco3	TCCCACTGCCCATC
Smco3	GGGACAGTTCCTTC
Smco3	GGGAACCAGTCCGG
Smco3	GGCTGTGAACCAGA
Smco3	CTGGAAGCTTCTGG
Smco3	CAGCCATTTCTGCC
Smco3	ACCTAGCCTGGGAG
Smco3	aaggagaagtgcat
Sox5	ttccagcagcggtc
Sox5	TGGACATCCCTGAA
Sox5	TCACAGTTTGATTG
Sox5	GTGCGGCTGTGCAG
Sox5	ggtcaaggagtcct
Sox5	GGAGAGTCGGGGAG
Sox5	GCGCTTGGAGAGTC
Sox5	CAGCCGATCATAGG
Spsb2	GGGAGGTGACGATA
Spsb2	GCGCGCATGCTTTG
Spsb2	CTCCCAGACCACGG
Spsb2	CTCAAGGCGGTAAG
Spsb2	CGCCGTGGTCTGGG
Spsb2	CCTTGAGAACCCAC
Spsb2	CAGTGGCTGGTCAG
Spsb2	AGGGAGTCCTGGGA
Sspn	GGGGGACCCGAGGG
Sspn	GGAGGGGGACCCGA
Sspn	GGACCTGGCGCCCA
Sspn	CGACAaggaagaaa
Sspn	CATTCCCATCACAC
Sspn	CAAAAAAGTAAAGC
Sspn	AGGTCCCTGTGCGT
Sspn	AACTGCCAACGCAC
St8sia1	GTCTGCGGAGTCCA
St8sia1	GTATGCACAGATTG
St8sia1	GGGGCGCGGAGTGA
St8sia1	GGGGCCTGCACCCT
St8sia1	GCGACGCTAGCCCA
St8sia1	CCGTGACCTGCTTG
St8sia1	CAGGGCGCAGCAGA
St8sia1	AAGCAGGTCACGGG
Stk38l	GTGTAGGTTGGTCC
Stk38l	GTGGGGGTCGGTAC
Stk38l	GGACACTTCCGCCT
Stk38l	GCGGGCGGAAGTGT
Stk38l	GCGGAAGTGTAGGT
Stk38l	GCCCGCGAAGGTGG
Stk38l	CATACGCACCCAGG
Stk38l	AGGCGGTGCCAAAG
Strap	TGACGCGACGCGTC
Strap	GGAGAGCGACAGAA
Strap	GCGGCTCCCAACAC
Strap	GAGCAGCATGGGTT
Strap	GAAGCAGTGTGCGC
Strap	CGTCAGAGCAGCAT
Strap	AGGGACGGACTCGG
Strap	ACACTGGGTAGCAA
Styk1	TGGTATAACCATCC
Styk1	gttaggtgtaatac
Styk1	gacaaaataataca
Styk1	cgtgagtgtCGTTC
Styk1	aggtgtaatacagg
Styk1	aggtagccacaggc
Styk1	acagggaacttact
Styk1	AAGTAAATCAGAAT
Syt10	TGGCAGGCTGGCGC
Syt10	TCGGGGAGGGACCA
Syt10	GGGAGTAGCAAAGT
Syt10	GCGCGGCCAATGGC
Syt10	GAAAGGTGTATGGA
Syt10	CTCAGAAAGGTGTA
Syt10	ACGGGGGCTCAGAA
Syt10	AAGTTGGATTGAAA
Tapbpl	GGGAATCTATCTTC
Tapbpl	GCGGGGTGGACCTT
Tapbpl	GCCCCAACTATGAG
Tapbpl	GATGTGGTGATACC
Tapbpl	GACGAGATGGGGTG
Tapbpl	GAAGATAGATTCCC
Tapbpl	CCCTCTCATAGTTG
Tapbpl	AGGGTCCAGAGTAC
Tas2r102	TTAGGATATGGTAA
Tas2r102	GCCATTAAGGACTT
Tas2r102	GAATATTTCCTGTT
Tas2r102	CTCACAATGCAAAC
Tas2r102	AGTTTGCATTGTGA
Tas2r102	AGTCCTTAATGGCA
Tas2r102	ACTTCAAAAGGAGC
Tas2r102	AAGGAAATTTGGTT
Tas2r103	TGCAGCAACTACTG
Tas2r103	TGAAATTTGGCTTT
Tas2r103	TATTAACACATCTT
Tas2r103	GGGCATGAAGCATC
Tas2r103	GACTGCTGTATACA
Tas2r103	ATAACTTTAATAGC
Tas2r103	AACTGACAATATGT
Tas2r103	AAAATTGTTGTCAA
Tas2r104	taacctaaggttaa
Tas2r104	gctaccatgagaag
Tas2r104	CTACAGAATGTGTC
Tas2r104	cgcttgaatctcct
Tas2r104	CAAAATAGTCTCAG
Tas2r104	AGTCATTATTTAAG
Tas2r104	aggggtgtttagac
Tas2r104	ACATCAAGAATATG
Tas2r105	TCTTACAGGGAAAG
Tas2r105	TCTAGTAGTTGAGT
Tas2r105	GAAACTGCTACTGT
Tas2r105	CTTATCTACAGAAT
Tas2r105	CAGTAGCAGTTTCT
Tas2r105	CAAAATTATGTTGT
Tas2r105	AGAACTCAATATAG
Tas2r105	AAGTTAAGTCTTAC
Tas2r106	taggggatccagac
Tas2r106	GTAACGGCTTTTGG
Tas2r106	CGGAATGGAGATAC
Tas2r106	CCAGTAACGGCTTT
Tas2r106	CAGAAGTATCTTTA
Tas2r106	CAATATTCTGCAGC
Tas2r106	AGACATATACTGAC
Tas2r106	AAAACAGTGTCAAA
Tas2r107	TATCACATGACAAT
Tas2r107	GGTTATGTAGAAAA
Tas2r107	GGGGTTTGAGACAT
Tas2r107	ATTCAGAACTTTAT
Tas2r107	ATATTAAAAATGGG
Tas2r107	aggtctagctcctt
Tas2r107	AGGCAGGGCAATGT
Tas2r107	ACTGTCAAATACAC
Tas2r109	TCATATGTTTTCCT
Tas2r109	TAGAGGAACAAATA
Tas2r109	GATAAAGAAAATAT
Tas2r109	GAGCAAAGCACTTC
Tas2r109	CTCTCTTAGCTATA
Tas2r109	ATAAGGACATCATA
Tas2r109	ACATACATTATTAG
Tas2r109	AAGACACATTTTTG
Tas2r110	TTCAGGTACTATGT
Tas2r110	TTAGACACAGTGTC
Tas2r110	TGTGGTACTTCCTT
Tas2r110	TGCAGATAGGCAAA
Tas2r110	CAACTTCAGAAAAC
Tas2r110	ATGAAACAATTCCT
Tas2r110	ATATAAACAATCCC
Tas2r110	AGTAATGTATAAGT
Tas2r114	TATAGGATGCAAAA
Tas2r114	GGTCACTGGAGGGT
Tas2r114	GACAAGCTAAGGAC
Tas2r114	CTGAAAGGTCTTCA
Tas2r114	AGTGTCAGGTTGTG
Tas2r114	AGGTATATACCTGC
Tas2r114	AGGGTGGGAAGTTG
Tas2r114	ACAGGAGCAACTGA
Tas2r115	TTGATACTTGATTT
Tas2r115	ttacaaatgctgaa
Tas2r115	TCCCTTGTCTGTGC
Tas2r115	TACCTGCACAGACA
Tas2r115	GGCTTATTATGCTT
Tas2r115	ATTGTAGCATACAT
Tas2r115	ATTGGTGAAATCAG
Tas2r115	AGAATTAGTAGAAT
Tas2r116	TTTGCAATGTCTCT
Tas2r116	TTAGCAAGGCTTAA
Tas2r116	CTTAATGGCTTGTT
Tas2r116	CTGTACATTGTTTA
Tas2r116	CTACATCTAGATGG
Tas2r116	AGTTCTTCTCTATA
Tas2r116	AAGGACTTTTATGA
Tas2r116	AAACTACATCTAGA
Tas2r117	TTTGGAAACTCACA
Tas2r117	GAGCAAAAGAATTC
Tas2r117	CTTTCTTGCCTATA
Tas2r117	CTCTGTTAGTGTGT
Tas2r117	CCTGTAGAATTTTC
Tas2r117	CAATGTATATAGTT
Tas2r117	CAACACACTAACAG
Tas2r117	AAAGAATTCTGGTC
Tas2r120	gtgctgctcttgaa
Tas2r120	GACTCTTAGCAAAT
Tas2r120	CAATGTGTTGTAAT
Tas2r120	AGAGTCAAATAAAG
Tas2r120	ACGTGGAGCATGTA
Tas2r120	aattggaGACATTA
Tas2r120	aatataccagtcaa
Tas2r120	aaaaagtatgcaat
Tas2r121	TACTCATCGACATT
Tas2r121	TAATCCTGGTGAAT
Tas2r121	TAAATGACATCTTT
Tas2r121	GTTCAGTCTTTAGA
Tas2r121	GTCACTACATAAGA
Tas2r121	GTCAATATTAATCC
Tas2r121	CTCTCCAATTCACC
Tas2r121	ATCTTTCAAGACTA
Tas2r123	TATGTCATCTACTC
Tas2r123	TAGATGTGAAATAC
Tas2r123	TACACATTACTCTT
Tas2r123	CAAGATTTTCATGG
Tas2r123	AACATCAATTTTCC
Tas2r123	AAATGGGATTTTAA
Tas2r123	AAAATGTGTATACA
Tas2r123	AAAAGTCTACATAT
Tas2r124	TTATACTGATTGAA
Tas2r124	TGTAACAAGAATGT
Tas2r124	GTTCAATCAGTATA
Tas2r124	GATTAAATGCCAAA
Tas2r124	GACATTGCAGAAGG
Tas2r124	GAACGGCTTGTATG
Tas2r124	ATTGCAGAAGGAGG
Tas2r124	ACAACCCATTTTTG
Tas2r125	TTCCAGGCTACGAT
Tas2r125	TGCCACTGATGATG
Tas2r125	GTCCTATCGTAGCC
Tas2r125	GTATGTAACTCAGT
Tas2r125	ATGTTGATTTGCAT
Tas2r125	AGATGTACCAATGT
Tas2r125	AGAGGTTTGGTGAT
Tas2r125	ACATTCACCTACAT
Tas2r129	GTTGAACTGAAAAG
Tas2r129	GTGCAGTAACAAAT
Tas2r129	GACTACTGTAGTTA
Tas2r129	CTTTCTGAGTATAA
Tas2r129	CCTGATACAAGTCT
Tas2r129	CACTGTAGACCAAG
Tas2r129	AGATGAAAATGTTG
Tas2r129	ACAGTGTGTATATT
Tas2r130	GCGGAGAAGATAAA
Tas2r130	GCAGCTGAAATTTG
Tas2r130	GACATACAATATCC
Tas2r130	CATGGAAAGTAATT
Tas2r130	CACACAGTTAATTT
Tas2r130	CAATATCCAGGCTA
Tas2r130	ACAGCTTGAGACCA
Tas2r130	AAATTCTGGAGAGT
Tas2r131	TGTTTCAGGTGAGG
Tas2r131	TATGAGATTAAAGT
Tas2r131	TATCAACCTAATGG
Tas2r131	GCAGTGCATGTTTA
Tas2r131	GAGTGCAGTGTTTC
Tas2r131	ACAAGTGATGATGT
Tas2r131	AATGGGAATTTTGA
Tas2r131	AAACTTCCTCCATT
Tas2r136	TTTGACAATTTTTT
Tas2r136	TTCCTACTTGAAAA
Tas2r136	GGCCATTTTCAAGT
Tas2r136	GCATTTCAGAGCTG
Tas2r136	GCAAATCAGTTCAA
Tas2r136	GATGAATATGGTAC
Tas2r136	CTTGAAAATGGCCA
Tas2r136	CTAATGGATGAATA
Tas2r140	TTGATTCATATGAT
Tas2r140	TTCTTGGACAAAAA
Tas2r140	GTAGATGATTCTAT
Tas2r140	GAATAATTTTGTCT
Tas2r140	ATTCTGGGCTTTCT
Tas2r140	ATTCACTAATAACT
Tas2r140	AGCTAAAATGTACC
Tas2r140	AAAACACTGAAAAT
Tead4	TCAACGCAACCCGG
Tead4	GGGACAGGACACGG
Tead4	GCGCCCCACCCCGG
Tead4	GCCCAGCCTCTCTC
Tead4	CGGTCTCCTCCCAA
Tead4	CCGAGGGGTCCGCG
Tead4	CACGGGACAGGACA
Tead4	ACCCGGGAACCCCG
Tm7sf3	TCCCCGGGCTCACG
Tm7sf3	TCACGGGGCAAGCC
Tm7sf3	GCGCGCGCCCGCAA
Tm7sf3	GCAAGGGCCGGCCG
Tm7sf3	GCAAGAACTCGTCC
Tm7sf3	CTTCTGGGCTCCCC
Tm7sf3	CGCGCCTCCTGCCG
Tm7sf3	CCGGCCGGCCCTTG
Tmem52b	TTAGAGTAGGTAGT
Tmem52b	tccatctactgagg
Tmem52b	TAGTTACACACTCT
Tmem52b	GTTGATTATCAACA
Tmem52b	GTTAACTTGGAAAA
Tmem52b	cttgctgttcccta
Tmem52b	ATCAACACGGTAAG
Tmem52b	AGGGGAGAGTTTTA
Tmtc1	TGGCCTCTACCAGC
Tmtc1	GCGCGCAGGTTTAG
Tmtc1	GCGCCAGCTGGTAG
Tmtc1	GCCGCAGGGCTTGA
Tmtc1	GAGGCCAGGTGTTG
Tmtc1	CAGGGGTGCATCCC
Tmtc1	ATGCGCAGAGTGGG
Tmtc1	AGGTCCCAGGATCC
Tnfrsf1a	TCCCGTGAGATAGG
Tnfrsf1a	gggtgagcttagac
Tnfrsf1a	ctggggagaggcga
Tnfrsf1a	CGGGAGTTATTAGG
Tnfrsf1a	CCGTCCCGTGAGAT
Tnfrsf1a	CAAGCTACGGGACC
Tnfrsf1a	AGGCGGGAGTTATT
Tnfrsf1a	AAGGAGTTCTCGGC
Tpi1	TTCTAGAGGGTTCA
Tpi1	GTCGAAACACCggg
Tpi1	ggcggagcagcaag
Tpi1	GGCGCTTTCGGAGT
Tpi1	ggccgggctaacca
Tpi1	CTGTCGAGCCACTG
Tpi1	ctaaccatggcgga
Tpi1	AGGGGCATTTCCTG
Tspan11	TTCCTTGGGATGTA
Tspan11	GTGGGACGGGACAG
Tspan11	GGTTCCTGTGTCTC
Tspan11	GCGCCCACAGGCCC
Tspan11	GATTACTGATGAGT
Tspan11	CCACAGGCCCGGGG
Tspan11	CATGACAGGTTCCT
Tspan11	CAAGGAACCTGTCA
Tspan9	TGGGGCTGGACCGA
Tspan9	GGGGCGGACAGAAT
Tspan9	GGCGTCCGAGCTGT
Tspan9	GGACCAGTAAGGGG
Tspan9	GCTGTGGGAGGACC
Tspan9	GCGGGACCAGTAAG
Tspan9	AGGCGAAGGCCTCA
Tspan9	ACAGAATGGGGACC
Tulp3	GGGAGCAGCCCCCC
Tulp3	GGAGCGTAGGGCAC
Tulp3	GGACCAATGGGCGT
Tulp3	GCGTGCGCTAGATC
Tulp3	GACCCAACCCCGGG
Tulp3	CCCCGGGGTTGGGT
Tulp3	CCAGCACCCCTCTG
Tulp3	CAGCCCCCCGGGGT
Usp5	TGGGAGAGCAGGAT
Usp5	TGGCGGTTCCAGGA
Usp5	TGAGTCGCGCTCAT
Usp5	GGTGGAGCGCCAGG
Usp5	GCGGCGCTTTTTAT
Usp5	GAGGCGGTAGCCCA
Usp5	GAGCGCCAGGAGGC
Usp5	AAGACGCGCGAGAT
Vamp1	TTGCTGTAGTTGTG
Vamp1	TGAAGTTCGTGATA
Vamp1	GTCTAACTCAGCGG
Vamp1	GGATGGTGACGGGG
Vamp1	GACCAATACAAAAG
Vamp1	GACAGAGTTTGAGC
Vamp1	CGCTGGAATCCAAC
Vamp1	AAGGTCTAACTCAG
Vwf	TTGAAAAGCCAGGA
Vwf	TTAAGAGAAGGCCA
Vwf	TGTGGTGGTGTTTG
Vwf	TGACAGCCTGGTCC
Vwf	ggaaggtctctatg
Vwf	CTGGCTGCCTAAAG
Vwf	CTAAAGGGGCACTC
Vwf	ACTCAGGGTGTCTC
Wbp11	TGAGGCGGGTCTCT
Wbp11	TATAGTTATCCAAT
Wbp11	TAACACAGATCCAA
Wbp11	GCGTTGCCAGGCAC
Wbp11	GATTGGATAACTAT
Wbp11	GAAGTGACGTGAGC
Wbp11	ACGCGGTGAGATCG
Wbp11	AATACTCTGGAATG
Wnk1	ggggccgccccggg
Wnk1	GGCGCGTTCCTCCC
Wnk1	GCTCGAGGCACGAT
Wnk1	gcccACATCGCGCT
Wnk1	GAAAGGAACCCGGG
Wnk1	CCCGAGCGCGATGT
Wnk1	ATCACGGAAGTAGT
Wnk1	ACATCGCGCTCGGG
Wnt5b	TCCCGCAGACTCTG
Wnt5b	GGGGCGCGGAAGGC
Wnt5b	GCTCCGGACTCCAA
Wnt5b	GAAGGCAGGTGCGG
Wnt5b	CTGCGAAGCGACCC
Wnt5b	CGCCCAGCTCCGGA
Wnt5b	CCCCGGAGCCGGAC
Wnt5b	CAGTGGGCGCGGAG
Yars2	TGGTCTGGCTACGA
Yars2	TCGTAGCCAGACCA
Yars2	TCGGGCGTAGCGGG
Yars2	TAGAGGAACAGCGG
Yars2	GCGGGGAATGCTGG
Yars2	CCGCGGCTTGTTCA
Yars2	CAGACGGTGTACTG
Yars2	CAGACCAGGGACTG
Ybx3	gggcggcggcTCGA
Ybx3	GGGCGAGGTCGCCG
Ybx3	GGACTAACCAGCTC
Ybx3	GCGCCCGCGCTACT
Ybx3	gcGAGCACTTGCGC
Ybx3	CGCGCTACTCGGCA
Ybx3	CCACTCCACCTCTC
Ybx3	AGCTGGTTAGTCCG
Zfp384	TTGAAGCTGTTGGG
Zfp384	GTCCAGGAGGGCGG
Zfp384	GCGTGGAGGACTCG
Zfp384	GCGAGGCGAGGTGT
Zfp384	GCGAGACACCCGCA
Zfp384	GCCCGGCCGAGCGT
Zfp384	CGGAAGTGGTGCTG
Zfp384	ATCCGGTGCTGTTA

## Sheet: Chr12q gRNAs
Mouse Homolog	gRNA Sequences
1190007I07Rik	ATAGTACCAATGCACCACCT				Total gRNAs	2596
1190007I07Rik	GGCCATGTGCGCCGGGGCCC
1190007I07Rik	CCGGGGCCCAGGTGGTGCAT
1190007I07Rik	GATAGTACCAATGCACCACC
1500009L16Rik	GCTCTGCTTACCTCGGCCCG
1500009L16Rik	TGTTGACAGCTTCAGAGGGC
1500009L16Rik	CGGGTGGCGCGATGGGTTGC
1500009L16Rik	AACTATGGAGGAGTGTATGT
1700017N19Rik	CTGATCTTCACACAACCCAG
1700017N19Rik	TTCTGGGAAACCCAACCTCT
1700017N19Rik	AGCAAACCCCGAAATATCAA
1700017N19Rik	TGATATTTCGGGGTTTGCTG
1700113H08Rik	ACTTCTGCAGAGGCCAATGG
1700113H08Rik	TGTGAGCAGTGTGACCCTGT
1700113H08Rik	TGAGTAAGGAATCTGGAGCA
1700113H08Rik	GAGACTTAGGAATTGTGTAC
2210016L21Rik	AGGCGGCTACGCCCGCCTGG
2210016L21Rik	GGAATTGGCACGCTGTCGCG
2210016L21Rik	GCAGCGGAGAGACCCGAAGC
2210016L21Rik	GCCACGTGGGCTCGGAACTC
Aaas	AGGGTGACTTGACCTCTAGG
Aaas	CCCAGGGTGAGACAACACCT
Aaas	AGGGAAGCAGTTCAAACACG
Aaas	GCCCCAGGGAGGCTGGACCA
Aacs	GTTGGGGGTCGGAACCAGCG
Aacs	GGAGCCATCATACAGGACCA
Aacs	AGGCAGAGAGGAGATCGTGA
Aacs	GCTGAGTGCACCATGCACTT
Abcb9	TGTCCTGGGAGACTGCATGG
Abcb9	GATGATAGGGAAGCCCATGA
Abcb9	GTTCAGTCTGGCAAATACGA
Abcb9	TGCTACGATGAGGAAAAAGG
Abcd2	AGATTAGAGCCACCGAGTGG
Abcd2	TGTCCGGATGAGAGTATAGG
Abcd2	AACTTGTGACCACTGAAACG
Abcd2	GAAAATCGTGAAAAGCATCG
Acacb	GTTAACGAGATACTCCACAG
Acacb	GGGGAACTGGCATAGCACGG
Acacb	GAAGTTTGGCGCCTACATCG
Acacb	AGAACAACGATATCGACACG
Acad10	CAGGCAACAGAGAACCACGC
Acad10	GTACTCCATCAAGTAGAAGG
Acad10	GAAGTCACCATGCACCAGCG
Acad10	GCAGCATCCCAGCAATGGAG
Acads	TGTGCTGGCAAATACCACCG
Acads	GCTCATGATAACTCCCGTGG
Acads	GCTGGCAAATACCACCGTGG
Acads	AGTTGGCATGGGAACCAGGA
Acss3	GATGTGTAGAGAATGTACAA
Acss3	AGCTGGGGAAAGATGTGATG
Acss3	GGTGTGGTTAGACCCACTGG
Acss3	GCTGACCCCGAAAGATTCTG
Actr6	GTAAGGAACAATGTGCGTGA
Actr6	GGATATAAAAGAGTCCTGAA
Actr6	TGGCACAGCAAATCTCTCGT
Actr6	TGAGTGGGAAGTATAAATTC
Acvr1b	GATGCGCAGAGCTGTCAGAC
Acvr1b	TGTCAGTGACCGCATCATGA
Acvr1b	CAACTGGTGGCAGAGTTATG
Acvr1b	GAAAGATGATGCGGGAGTGC
Acvrl1	GTTGCGCTGGTAGAGTGTGT
Acvrl1	GTTCCGCGAAGTCATGTCGG
Acvrl1	TGCTATGGGAGATCGCCCGG
Acvrl1	GTGGCATGGCGAGAGTGTGG
Adamts20	GCTCCGTGAAGGATCACACA
Adamts20	GAACTCATTGACCCGCGTGG
Adamts20	GCTGCGTTAAAACTGATCAC
Adamts20	GAAACAGTGGCGCAGGTCTG
Adcy6	GATGAAGCAAAAAACCAGGA
Adcy6	GGAGACCCGAGGTTACATCC
Adcy6	GACCCTGGCTAACCACATGG
Adcy6	GCGAATGGGAAGAAGAGTGT
Adgrd1	GTAGAGAAGGCCGACAATCG
Adgrd1	GCTGATCAGCAGCAAGACCT
Adgrd1	AAGCACCCCAAATACCCATG
Adgrd1	GAAAGTGTCACACACCTACG
Agap2	GCACCTGGTATGAACCCGTG
Agap2	GCAGGGAGGAGCGTGAGTCG
Agap2	CAGCTGTGTAATGACAACGT
Agap2	GCCGCTGGGCCGCCAACTGT
Aldh1l2	GAAGAGATCAGACAGAGTTG
Aldh1l2	TGAACACTCCCACTACTCGG
Aldh1l2	AGAACTGCATTGCAGCTGGG
Aldh1l2	GTATGTGAGTGACAAGCTAG
Aldh2	GATGCATCCATGCGGCGCCA
Aldh2	AGGGGAGGTCATCTGCCAGG
Aldh2	GTTCAATGAGATCCGCCAAT
Aldh2	GGGCCAATGATTCTAAGTAT
Alg10b	GCATGTGATCTGCTCCATTG
Alg10b	GAAACCACAAAATCCAAGCA
Alg10b	GCAGAGACCAACCTGCGACA
Alg10b	GACAAATCTGAGCACCCCAA
Alkbh2	AAAGATGGTTGCGACCACAT
Alkbh2	GGGGAGACTGTGGTACCAGT
Alkbh2	GCCCACTGTAGGTACAAAGA
Alkbh2	GAAAGTGGCACAGTGTTCCC
Alx1	GAACTATGGAATCACCAAAG
Alx1	GTTCTCTGACATATACATCT
Alx1	GACGGCTGGCAAATGCGTGC
Alx1	TAAGACTGATATGTCGTACG
Amdhd1	GATGAGGGCTGGCACCACGC
Amdhd1	GAACATGAGAATGTCCATGC
Amdhd1	GGTGGACGCACACACACATC
Amdhd1	GTTGGCAGGGGCCACGTACA
Amhr2	GGGATCTGGAATCTTACCCA
Amhr2	GGTACTGGAACTGTACCCTA
Amhr2	GGAAAGAGGACGCCCCGTGA
Amhr2	AGATAGGTCATGCGCCATCG
Amigo2	TGCGATACAAGAATATACCC
Amigo2	GTATACTGGGAGGTTCAAGC
Amigo2	GGTGCAGCTGACAATGTCGG
Amigo2	GTTGGTGCAGCTGACAATGT
Anapc5	TGAAAACATCTTGAACACGG
Anapc5	GAACGGGGAGAAAAAGACGG
Anapc5	GTTCTGGAAGTACTGCTGGA
Anapc5	GTGACCGAAGCGGCAGTGCA
Anapc7	AGACCACGTGCGGGACATGG
Anapc7	TGGATCTTCCAGACACACGG
Anapc7	GAATGGCGTCAAGGGCCAAA
Anapc7	GCAGAGGCCGGACTACGTCA
Ankle2	GACGCTACAGTCCAGCACAT
Ankle2	GCAAGTCAGGACCAACACTG
Ankle2	ATGACACTGAGAGCTTTCGT
Ankle2	ATGCTGAGAAATTTGCTAGA
Ankrd13a	GATGAAGCCAAAAAGCAGGG
Ankrd13a	GCAGGTTTAAGGCTACGCTG
Ankrd13a	GGAAAGATCGAAGTGTTCGG
Ankrd13a	GGGGATGACCTGCTCCACGA
Ankrd33	GCAGCTGAGCAGAGCCACAA
Ankrd33	AAGGAGGGCAACTACACACT
Ankrd33	CATGGTAGCATGCAACCATG
Ankrd33	GTAGTTGCCCTCCTTATGGC
Ankrd52	GCAGCCGACTCACCCCACGG
Ankrd52	GATGGGGACATCGCCTACGT
Ankrd52	CTGGATGTAAGGGACCACAA
Ankrd52	TGGGTTTGACATCAACACAC
Anks1b	GAAATTGGAATCCTTAACTC
Anks1b	AGTTAGCATTCGGAAGTCAG
Anks1b	GGTGTAATCACCCAGCTCAA
Anks1b	GACTTCCGAATGCTAACTCG
Ano4	GAACACAGCAAAGAACACAG
Ano4	AGCACTCATACAGTAGATGT
Ano4	GACTTGGCAGTGATCCAGAG
Ano4	GATCAATAAGGCATCCGCTA
Ano6	AGAAAGACCAATAATACACC
Ano6	GATGGATGTGGCCATCTGTG
Ano6	GACAATGATCCCGATCACAG
Ano6	AGACCAATAATACACCAGGC
Anp32a	GTAAGTTGGAAATGGAGGTG
Anp32a	GATAACTGTAAGTCAATTGA
Anp32a	GCCATCGAGGTACATGACCT
Anp32a	TTCCTAAGTACAATCAACGT
Apaf1	TGCGCAGCATCAGAACACGG
Apaf1	GGAAACTGAATGGAGAACCA
Apaf1	GTTTCAAGAGAACGAAACGA
Apaf1	AGCGTTGTAGAATGAAATGT
Apof	GGGGGCATGTAAGTGAAGCC
Apof	CGAGATGGGGCCATAGATCT
Apof	GAGATCATAACCCAGATCTA
Apof	AGCAGCATCTGGCAGGACAA
Appl2	GAATTCCTTGACCAGAACAG
Appl2	AGATCTGGAAGCAGTATCGT
Appl2	TGAGGCAATGAGACAAGTAC
Appl2	TGGTCACCAGTCAAACTCTG
Aqp2	ATGGCCCAGAGCCTGAACCA
Aqp2	GTAGAAGGCAGCTCGAAGGA
Aqp2	GAACTCGGCCAGCACCGCTC
Aqp2	TTGACTTACTTACCCCAAGG
Aqp5	GAGTGGTGGCCACATCAATC
Aqp5	GGCTATGGAGATCTGCAGAA
Aqp5	CTGGGTAGGACCGATCGTGG
Aqp5	GATCTGGTTGCCTATTAAGA
Aqp6	AGGTATTCGAGAGACCCTTG
Aqp6	GGCACTGGGCCACCTCATTG
Aqp6	GATATGGGATCCCACGAGGT
Aqp6	AAAGAAAACGTACAGCCCCG
Arf3	TGGAAGTAGTGTCTCCAGAG
Arf3	GAAGAGCCTAATCGGCAAGA
Arf3	TGGCCTGAATGTACCAATTG
Arf3	GTACCAATTGCGGTGACGCA
Arhgap9	CGAATGGGATGATATTCACG
Arhgap9	AGACGTGGATGGTATTTACC
Arhgap9	CTGCCCGGGGTAGAATACGT
Arhgap9	GAAGCGGAGTTTCTGGACCA
Arhgef25	CGACTTGGGACAGATCGTAG
Arhgef25	GGAAACAGAAAGAACATATG
Arhgef25	GAACAGCTGAGCCAACCAAT
Arhgef25	GTATCGAGGAGGATCAGACA
Arid2	GTTTCTGAGAAGAATCAGTG
Arid2	AGTGTGAAACATCAGATGAG
Arid2	GAAGATGGGATTGCACCAAT
Arid2	GTACATGCTCACTGAAATGG
Arl1	TAGGAGGACAGACAAGTATC
Arl1	GCCTTGATGAGGCAATGGAA
Arl1	AGTTGTGACCGAGATCGAAT
Arl1	TGGAAATGCCAATTCGATCT
Arl6ip4	ACGACACAGAGAGATCAACA
Arl6ip4	TGTGCCACTGATCCAGTGAG
Arl6ip4	GCCTCGCTGATGGCTCACGT
Arl6ip4	GAAGTTGAAGAAGAGAGTCA
Arpc3	TGAGGCAAGAGACCGGACTG
Arpc3	CTGGCTTCGGAGGGGCAACA
Arpc3	GAGAAGGAAATGTACACGCT
Arpc3	CTGTATTGCAGAGATGATGC
Asb8	CGTAGAGGACCTCATCAGAG
Asb8	GCTACGGCGCACAGCATAGC
Asb8	GATGGTTCGGATCAGGCGTT
Asb8	GTAATCCAGGGCATTGACGG
Ascl1	GTTGGGGACATGCTCCCGGA
Ascl1	GCTGCTGGACGAGCACGACG
Ascl1	GTTCCGGAGAGGACGAGCGC
Ascl1	CGTTGGGGACATGCTCCCGG
Ascl4	CGCGTGCGCTGTGTGAACGA
Ascl4	GTTGCGTTGGCGCAAAAAGG
Ascl4	GCCCGGGAGGGAGCCCTGCA
Ascl4	TTGCGTTGGCGCAAAAAGGC
Asic1	TGATTGTGAAACCCGTTACC
Asic1	GACCCCACAGGTGACATCGG
Asic1	GATGAATACTTGCCTGTGTG
Asic1	GGAAAACTGCAACTGCCGTA
Atf1	GCTCCTCACAGAAAGCTCAC
Atf1	GATACTCGTCCCGAGCAACC
Atf1	GATCCCGTGAGCTTTCTGTG
Atf1	GAAGGAGTACGTGAAGTGCC
Atf7	TGGAGCCTGTGTGATGACAG
Atf7	GCCGGCAAAAGCGGAAACTG
Atf7	CCGGCAAAAGCGGAAACTGT
Atf7	AGTCACATTACTACGCAATG
Atg101	TGACAGTCCACACCTCCCAG
Atg101	GATGCACTGAGGAACTCAGG
Atg101	GAAGATCATTAACATCGTGG
Atg101	GCAGGAGCGGCAGATATGCA
Atp2a2	AGTTCCAAGAGCTAAGCAGG
Atp2a2	TTGGTAGCCAATGCAATCGT
Atp2a2	GATAACAGAAGTACAACCAA
Atp2a2	GCAGTGGCAGCGACACGCTA
Atp2b1	GAAGAGCTGCATCAGCACAA
Atp2b1	GGAATGGGGACCTTACTCTG
Atp2b1	GGGCTTACCGTACTTCACTT
Atp2b1	AAGAAGGTGAAGGAGAAACG
Atp5b	GTTGGTGAGAGGACCCGTGA
Atp5b	AATAGCCCGGGACAACACAG
Atp5b	GCTGGTAGCCTACAGCAGAA
Atp5b	GATGACTGCCACGATTCGCC
Atp5g2	AAAATGTACTCACCAGGGAG
Atp5g2	CATTAGGCAAAAGAGCCCCA
Atp5g2	GGCAAAGCCCAGAATCGCGT
Atp5g2	AGCTGGGGCTGCGACAGTTG
Atp6v0a2	GAAGAGCTCGAACGAATACT
Atp6v0a2	TGCCCAGAGCCTCAGGTAGG
Atp6v0a2	AGCTACAGAGAAGTGAACCC
Atp6v0a2	TGAAGGTTTCCAGAACATCG
Atxn2	GAAGTACAAGTGAAAAACGG
Atxn2	ATATTGGGTGCGAAGCACAC
Atxn2	GTAATGCAGAGCACAAGAGG
Atxn2	ATGGAATCTATGCAAACGTG
Atxn7l3b	GATCTATGTAGACCTGATAG
Atxn7l3b	GTGCACCGGGCGGTCAAGTG
Atxn7l3b	GGTGACTACTGGAATTCCGG
Atxn7l3b	TAAGATGGAGGAGATTTCGT
Avil	GCTCACGGCAACTTCTACGA
Avil	TGGCCCGGAGAGCAACAGTG
Avil	AAGTTGCCGTGAGCACTCAG
Avil	AGGAAAGCTGGTTATCTACG
Avpr1a	GTAACAGATGAAGCCATAGC
Avpr1a	GCTGGTCATCCAGGTCACGT
Avpr1a	TCGGATGAAGAGATGCATGC
Avpr1a	ACGTAGGCACGGGTACCCCA
B3gnt4	GAAGTTTCGGCAGTGTCGAT
B3gnt4	AGTGTCGATAGGTTAAGAAG
B3gnt4	GTTTGATGACATCTTACAGT
B3gnt4	AGTTTGATGACATCTTACAG
B4galnt1	GGAGTACAGGAGACCCAGCG
B4galnt1	AGGTGCCTAGAGAAGCACTC
B4galnt1	CTGCAGGGGGTACTGTAAGG
B4galnt1	GGGGCGACCACAATGCCAGA
Baz2a	GCATCAAGAAGGGCAGCCAT
Baz2a	ACTGTGAAGGAACTCCACGA
Baz2a	GATACGGTAATACCCAGTAA
Baz2a	GCCCATGCACAAGCACACTT
Bbs10	GAAGTGAGGTACCTGGCTAA
Bbs10	TGGATGAAGAAAAGACAGAC
Bbs10	GACCCAGAACCGGTCCACAG
Bbs10	GTGTTGTGTACGAAGCCCAC
Bcdin3d	GCTGCCCGGTAACACTTCCA
Bcdin3d	AGGGTTGTGGCTCCACGAGG
Bcdin3d	CGACGTGGGGTGTAACTCCG
Bcdin3d	GATCGTGCGGATCTTGACGC
Bcl7a	ATCCCTACGAATCTACAAGT
Bcl7a	GACCCACTTGTAGATTCGTA
Bcl7a	TGATATCAAGAGGGTCATGG
Bcl7a	GGACCCACTTGTAGATTCGT
Best3	GCAGCCGCCAGTGTGTACGG
Best3	AGATTTCCAAACCAAATGAA
Best3	GATCCCACCAAAGGCTACGT
Best3	AAGATTTCCAAACCAAATGA
Bin2	GGACCTGAAGGCCATTGTGG
Bin2	GCTGCTGTAGACCTCCTGCA
Bin2	GTTAGGAGAGGATTGCCAAG
Bin2	GGAGGTCTACAGCAGCGACT
Bloc1s1	GTAGACGTATTCCAGCGCAG
Bloc1s1	TGGTGGATCACCTCAACGTG
Bloc1s1	GAGGTTCATACCCCACGTTG
Bloc1s1	GATCCACCAACGCTTCGGTC
Brap	GAAGCTGTGGTTGCAGAGGG
Brap	GTTTGACAGTATCGGCACAC
Brap	CGCATATTAAACAAATCCAG
Brap	GCTGTGGGCGGTACGTGAGT
Bri3bp	ATGGCCACCACGACGCAGAG
Bri3bp	AGAAGAAGCGGCCAAACACC
Bri3bp	CTTATGTAGGATATACACGC
Bri3bp	TATATCCTACATAAGTACGA
Btbd11	GACGCAGGCGTACATCAAGG
Btbd11	GAATTGTGGACGGACCGACC
Btbd11	GCCATGTGTGTAGAGTCCAT
Btbd11	AGTCAGAGCCGTCCAATGGC
Btg1	TGTAAGGAGGAACTTCTCTT
Btg1	GTTCCCAGAAAAGCCGTGCA
Btg1	GGCGATCTCGCCTATCATGG
Btg1	TGGAGCCATCCTCTCCAATC
C1ql4	GACGGTGGGAAGGTGCACGG
C1ql4	GGTCTAAGGCGGCCTCACGA
C1ql4	GTCATTCTGCACCTAGACGT
C1ql4	GCTTACCATGTGCTCATGCG
Cabp1	GAGGCCATGAGGAAGCTCCT
Cabp1	AGGATGGTTACATCAACTGC
Cabp1	CAGCTCAATGAGCTCCATCT
Cabp1	AAATGCAGGCGGGACCCAGC
Cacnb3	GACCAATGTCAGCTACTGTG
Cacnb3	AGAAGTACAGCAATGACTGG
Cacnb3	GATGATGGCGTACGATAAGC
Cacnb3	GCTCACAGGCATCTTCTAGC
Calcoco1	GCACTGGGCATGGTACCCGG
Calcoco1	TGGCCTTAGGGACAACCAAC
Calcoco1	CGTGTGATAATCTCGAACGC
Calcoco1	GGAGCTCACCGAGCAGTACA
Camkk2	AATGAGGACCATCTGTACAT
Camkk2	GCACGAACGAACCTGCAAAC
Camkk2	GGGCATGGAATCCTTCATCG
Camkk2	GGTGTAAGCAACGAGTTCAA
Cand1	GCAGACAGGTCAGAATTGAA
Cand1	GTTGTACACGTAGCACGCAG
Cand1	AGCAGCAATACACTGTATGT
Cand1	GAACTACAGTGACAGCCTGA
Caps2	GTTAAAATCCAGTTGCATGA
Caps2	GTCTATTACAGACACAATGC
Caps2	GAATTCGAAGATTACTATGA
Caps2	CAGCGCCAACAGGCAAATAC
Cbx5	TTTATGAAGAGAGACTGACG
Cbx5	GTCCAGGGAGCACAATACTT
Cbx5	CTGGAACCAGAAAAGATCAT
Cbx5	GACGTGGCACGCATATCCAG
Ccdc184	GGAGACTATAGCCCGCTGGT
Ccdc184	AGGACGTGAGGGCCATGCGA
Ccdc184	CGTGGGGGACGTGATCTCTG
Ccdc184	GAGATCATGACCAAGGACGG
Ccdc38	ATCTTGGGAATACTGAACCA
Ccdc38	GTCAGCCTGAGAATAAGAGT
Ccdc38	CGTCAGCGAAAAAAGCTAGC
Ccdc38	GGGAATACTGAACCAAGGTG
Ccdc59	GCACCTGAAACACCTCTATC
Ccdc59	CAGCCAGAAGAGCTGAACAC
Ccdc59	AAGAGAGAGAAGAGGCTCAA
Ccdc59	TTCCGGGGGAGCGTGCGCAA
Ccdc60	CGGGGTGTGTAGCAACATGC
Ccdc60	AGAAGGACATAACAAAGATG
Ccdc60	GAGGTGGGATCACTTCGTCA
Ccdc60	AGATACAGAAGAAAGCCCCC
Ccdc62	GATGAAGAAGGTCAAGACCC
Ccdc62	GCAGTCTGAAATGTGATTGA
Ccdc62	GGAGCTGAAAGACCGCGATA
Ccdc62	GCCGGTATAAGGTCGCCGAA
Ccdc63	GAAACTGAGAAAGACCACGC
Ccdc63	CGAGAGTTTCGCGAGCTATG
Ccdc63	GCTATGAGGTGGCGCACCTG
Ccdc63	GCAGACCAAGGGGGACTACG
Ccdc65	GCAGTGGAGAACCATCCTCA
Ccdc65	GTGGAGAACCATCCTCAGGG
Ccdc65	GATGTCTTGGTGAAGCTCTC
Ccdc65	GAAGGAGATGCACTACCTAC
Ccdc92	CGGCTGCAGCAGCACTGCAC
Ccdc92	AGCACGCCAGCACACTCAAG
Ccdc92	AGGGGCTGCACGCCGAGATC
Ccdc92	ATGGAGTGGCATGATGAATG
Ccer1	AGCAGCAGCAAACGCAGAGT
Ccer1	GCTATAAGAGGTGGGCGCCA
Ccer1	GCCACCCGGAAAGGTTGACC
Ccer1	TAGGAGGACCAGGTGCGCAA
Ccnt1	GAAACGTATTCGGAATTGGA
Ccnt1	GAAATTGGAGCATGTCATCA
Ccnt1	AGGAGCAGATGAAAACACGT
Ccnt1	TGGACCACTTGCAAGCCAGA
Cct2	GATCCTAGAACAGTTTACGG
Cct2	AGTGGCACCACGAAGCACAA
Cct2	GATGGATACAGACAAAATAA
Cct2	GATATGAAGGAAGGTACCAT
Cd63	GGCCCCACAGCAGCCCACAA
Cd63	AATACTCTTCACCAGACAGC
Cd63	CTGGTGAAGAGTATTCGAAG
Cd63	GCTAAGGAAGAACATACTGC
Cdk17	TGAGAGAGGAGAACTAAAGC
Cdk17	TGTGTGAACGATGTCGTGCA
Cdk17	GCAGACATCAGGATACCTGA
Cdk17	ACTCAACACAGATCGACATG
Cdk2	TGTCCGAACTTACACTCATG
Cdk2	AAGGAGAGAGATCTCTCGGA
Cdk2	GACTCTGGGGACCCCAGATG
Cdk2	AGTTCGGACAGGGACTCCAA
Cdk2ap1	GGAGCAAGAGCGCCATGGAG
Cdk2ap1	GCCATGGAGAGGCTAAAACG
Cdk2ap1	ACCTGGGTGTAGCCTAGCGA
Cdk2ap1	TGCAGGGAGCAAGAGCGCCA
Cdk4	AAAGCCCGAGATCCCCACAG
Cdk4	AGTGTTTGAGCATATAGACC
Cdk4	GCCAACGCTCCACATGTCCA
Cdk4	AAGTAATGGGACCGTCAAGC
Cela1	GGATCATGGCACCACACCTG
Cela1	GGTGCCATGATCCTCCATAC
Cela1	TGAGGGTGCCTCCACAGGTG
Cela1	AGTACCAGTATGGAGGATCA
Cep290	TTTGAAGAGAGACAACATGT
Cep290	GTTCCATGAAGAAAGACAGA
Cep290	GCATACAATCAACAGTCTAG
Cep290	GAAGCCCTTAGAGAGCGGGC
Cep83	GAAAATGAAATACAAGTCAG
Cep83	GTTCTCTGGCAGGACACTGG
Cep83	AGGTGGAGCGTGATGTCTGG
Cep83	AGAAAATGTCCAAAGAATAC
Cers5	GCCAAAGATCACAAAAAGGG
Cers5	AGATACGAACACCTTCTCAA
Cers5	AGCAGTCTGGACAATTAGGT
Cers5	GACAATTAGGTAGGACCAGA
Chfr	AAATCCGCTCCACTGGACAT
Chfr	AAGGTCCTGGCAGATGATAC
Chfr	GCATACCTTATCCAGCACCC
Chfr	GATACTGGTAGGTCAGCTCT
Chpt1	GGAGGAGCACCGCTACACCG
Chpt1	GTAGAAGATGAGCACTAGTG
Chpt1	TTGATGGGAAACAAGCCAGA
Chpt1	CTGGTAGATAAAGAGTCCCA
Chst11	GATGAACAGAATTTGCCGGA
Chst11	GATAAAGGATCCGAAGCAAG
Chst11	GAACTCCGTGGTCATCTCGT
Chst11	TGAGGATGAACAGAATTTGC
Cit	CCGGACGGGACACATCAAGC
Cit	GCTGGGTGCTAGCAAGTAGA
Cit	TGCGACGACAGATTCTAAGG
Cit	GAAAGGCGTACTGTAACTGG
Ckap4	GGAGTCCGACGTCTACACAG
Ckap4	GTCCCTGGAGAACACAGTCG
Ckap4	GGACGGGGTCTACTCAATGC
Ckap4	TCTGTCGGACGGGATCCACG
Clip1	AGGGAAGAACGATGGCTCTG
Clip1	GAAGAAGAATCAATTACCAA
Clip1	TGCCCTTTAAAGGTTCACAC
Clip1	CGAGGAGCTGGGGAGAACCC
Cmklr1	GACGGCCGAGCAGGTCATGT
Cmklr1	GCCGATGCACATCACCTACG
Cmklr1	AAAGATGTTGAACAGGAAGT
Cmklr1	GAACACCCAGTGGTAGTCCA
Cnot2	ATCTGAGAAAAGAAACTACC
Cnot2	AGGTCAGCTGTCTCAATTTG
Cnot2	AAGGACACGACTCTATGGTG
Cnot2	GACTCTATGGTGAGGACTGA
Cnpy2	AGGAGCCAAGATCTACACTG
Cnpy2	GGAGGTGTGTGACCGAATGA
Cnpy2	GTAACTCACCGCAAACTTGA
Cnpy2	TCCGCAGTGTGAGAGCATTG
Cntn1	AGACGCAGCACACTGCATGG
Cntn1	AGAGCTGACAATAACGTGGG
Cntn1	GAAATTCATACTCCATCCAA
Cntn1	AGACATCAGAGCTACCTCTG
Col2a1	GATGTCAATAATGGGAAGGC
Col2a1	AGGGGACTGAAGGGACACCG
Col2a1	GCCCTGACACCGTAGGACCG
Col2a1	CCTCAGTGGACAGTAGACGG
Copz1	TCTGTTGGAAGGATTGACAG
Copz1	GATGGCCTTGACAGTGTACA
Copz1	GCTGTGGATGAAATTGTAGA
Copz1	GCCTTGACAGTGTACAGGGA
Coq10a	AGTACCGAGAGTTCGTGCCG
Coq10a	GCCGTGGTGTAAGAAGTCAC
Coq10a	GAGGGTAGGAGGGAATACCA
Coq10a	TTGCTGTAGGTACTCAATGC
Coq5	GAAGTCCTACCAATACCTTG
Coq5	GTTGTGCCTGAACGTAACTA
Coq5	GAATACTTTCCACAAGGTAT
Coq5	GAATGTCACACACATTGACC
Coro1c	GTTGAGGTAGTGGACATATG
Coro1c	TGAAATGGACACTAGCAATG
Coro1c	GAAGGGCACTCAAAAAGAGT
Coro1c	AGCCTGTGGTGATTCTAGAA
Cox14	CACAGTGAGGAGCATCATCG
Cox14	ATGCTCCTCACTGTGTATGG
Cox14	GGTAACCCCCATACACAGTG
Cox14	GAAGGTCTTGTAGCCGATAT
Cox6a1	GGTGAGGGTAGGCAACGAAC
Cox6a1	TGGTCCTGATGCGCAGGTGA
Cox6a1	TCACCTGCGCATCAGGACCA
Cox6a1	GAAGGCCCTCACCTACTTCG
Cpm	GATTCCAGAATTCAAATACG
Cpm	GCCCCACAACGAGAACCCAC
Cpm	GTTGTCCCGAAGCTTAACCC
Cpm	AGCATCGGGAAATCTGTGAG
Cpne8	TGGGAATAAAGAATGGAGAG
Cpne8	AAGCAGTTGGGAATAAAGAA
Cpne8	CATCCCCGCCACACGAGTGG
Cpne8	CGGGGATGGCCGCACTCAGC
Cpsf6	GTATATTGGAAATCTAACAT
Cpsf6	GGGCAAATGGACAATCAAAG
Cpsf6	GGACCACATAGACATTTACG
Cpsf6	TGTGGGTGAAGAGTTCAACC
Cradd	GAAATCAAAGCTCAAACCAC
Cradd	TTACCCAGGGAAATTCCTGG
Cradd	GGCCTTGCAGCGGTAGATGT
Cradd	GCAGCGGTAGATGTCGGTCT
Cry1	GACATGATAAACAACCAAAG
Cry1	TGGAAGAGCCGGCGAACCAG
Cry1	AAGGGATCTGAACACAGATG
Cry1	GATAAGGACTGAGTCCAGTT
Cs	GAACCGAGCTAAGTACTGGG
Cs	GTATCGGAGCCATTGACTCT
Cs	GGACAGGTAAGGGTCTGAAA
Cs	GAGCTCGGTGAACTGAGGGT
Csad	GAAGTGAAGAGAGCCAAGGG
Csad	GCTTCAGACAGTCCACGCGG
Csad	TTCCATGAGCACAAACACGG
Csad	GTCAAAGGCCCCTAGCACGG
Csrnp2	CTCTTGCGCAAACTCACAGA
Csrnp2	GCTGACGAAGAACGGGACCG
Csrnp2	AGCCCCTGCCCACCAAACGG
Csrnp2	AGTGAGTCCGCACTCGGATC
Csrp2	AAATTTAGACAGCACAACAG
Csrp2	CGGGAGAACCGTGTACCACG
Csrp2	GTTTCCGGTGTGCCAAGTGT
Csrp2	GGGCGGTGGAAATAAGTGCG
Ctdsp2	GGGCCCGGAACACCCCGCAC
Ctdsp2	TGATCTCCTGGACCGGTGCG
Ctdsp2	GGTGGAACACACAAGCCTCT
Ctdsp2	ATGATGTCTACACCAGCCTT
Cux2	TGTTTGGTGAGAGCATCTTG
Cux2	GTCGGATGAGCAGAATGTGC
Cux2	GCTGAGGAGGAAATACGATG
Cux2	TGAACTGTACATGTACCGGG
Cyp27b1	ATGACCTAGATTGTACCCTG
Cyp27b1	GCAATCCGCAAGCACGCTGG
Cyp27b1	TGAAGTGGCATAGTGACATA
Cyp27b1	TTAGCAATCCGCAAGCACGC
D930020B18Rik	GAAGCACACGTTCAAGTACG
D930020B18Rik	GGAGCGCGGAAAATCGAAAG
D930020B18Rik	GCAAGAGACAGGGAGCAGAC
D930020B18Rik	TAGGTGCAGAAATATCGATG
Dao	GTAACGCTCATGAATGCAGA
Dao	GATGAAGTGTTTAATCCAAG
Dao	TGATCGGAGCAGGAGTCATT
Dao	AGGCCGGGGCCAGATCATCC
Dazap2	CAACTGGATAATAAGCCATG
Dazap2	AGTACCTCTGAATATGCAGG
Dazap2	GGCCATAGGCAGATACAATG
Dazap2	GCGCTGAGTTACAAGGACGT
Dbx2	ACATCAGCAAAACAGACCGA
Dbx2	GCTGCCAGAGGAGCCGCTGA
Dbx2	GCATGCAGAGTAGAATGGCG
Dbx2	AGGAAGGCCGAAGAGTGCTG
Dcn	GCACCACTCGAAGATGACAC
Dcn	GATGACACTGGCATCGGTAG
Dcn	GTGTCGGGTGGAAAATCCCA
Dcn	AGATGACACTGGCATCGGTA
Dctn2	AGTCCAAGAGCTGACAACTG
Dctn2	TGAAACCAGCGACCTACCTG
Dctn2	CGAGGAGAAGCTCACCCCTG
Dctn2	AGGCCGTGAGTGGAGTTCAT
Ddit3	GGGAGGTGGAGACCACACGG
Ddit3	GGAGCTGGAAGCCTGGTATG
Ddit3	GGAGGTGGAGACCACACGGC
Ddit3	GTCGATCAGAGCCCGCCGTG
Ddn	GCACCCTGGAGGCCCAGGGT
Ddn	GCTCCCGCAGGGTGACCCAG
Ddn	TGTCATTGACGCCACATGCG
Ddn	GCTGCCCGAAGGGCGTTCCG
Ddx23	GCTGAGCCGCTGCACCTACG
Ddx23	CGCCTCATCCAGAACCACGT
Ddx23	AACGCCTGTACACTGCATGG
Ddx23	GCCACTCGGTATCCGCACTG
Ddx51	AGGTGTGGCCACCACAATGT
Ddx51	GTCACCAAGGCAACCCTCAG
Ddx51	GGTCAATGTGGTCCACCAAG
Ddx51	GCTGACCATGGGTTTCTCAT
Ddx54	GCTGCGGAAACGCCGAACTG
Ddx54	GCTGCTGGTGGAATTTGCAC
Ddx54	GGCCAGGTCAGTCACGATGA
Ddx54	TGTAGCCACAAAGCACCATG
Ddx55	GCAGACAGACTGCTCGACAT
Ddx55	GAATGGGGATAACAAAAGCC
Ddx55	GCGTCCACATCGATGCACGA
Ddx55	GCCCTGTGCTCACCATATAG
Denr	ATGTTGCTAAATGTAGACAA
Denr	GAATTTGCAAAACTTACTGT
Denr	AGTCTGTTCATTACCAACAG
Denr	AAATACGTGACGAGAGTGTG
Dgka	GCAGAATGAAGAACAAGCTT
Dgka	AGATGGGCCAGATCTATACC
Dgka	CTGGGGTAGATGGAACACGG
Dgka	ATCACTGAGACAGATCACAT
Dhh	GTAGTAGACCCAGTCGAATC
Dhh	GTACGCCTACGTGTGACTGA
Dhh	GCCGCTCCGCAAGCGCACCG
Dhh	CGCGTGCAGCAGCCGCAAAG
Dhx37	AGAGCCAGGTGACTTACCTG
Dhx37	CGAGGAGCAAGCCATCATGG
Dhx37	GGCCCGGAGAGCCACAATGC
Dhx37	TGGCCCGGAGAGCCACAATG
Diablo	GATTGCTTCAATCAGCGCGT
Diablo	CAGGCCCTCAATCTTCACGC
Diablo	AGGTTCACTCACCTCAACTC
Diablo	TGCCAGGAATCACATCCAGT
Dip2b	GAAGTGTCGAGACTTACACT
Dip2b	GAAGAGCATTACCTCATCGT
Dip2b	GGCACATGAGGATATTACAC
Dip2b	GGGCCCGGACAGGATACCTC
Dnah10	GACCCGCCACACCACAATGG
Dnah10	GTTCAGCCAGTACACACTGT
Dnah10	AGTTTGTGACAACACACAGG
Dnah10	AATCCGGGTAGCGCACACGG
Dnajc14	GCAGATGCCAAGGAAAGCAT
Dnajc14	TGGGCTGGATGCCAGCGTGT
Dnajc14	GGAAAGGTGTATGACATCAC
Dnajc14	CTGGGGAGATACCCACACGC
Dnajc22	GGGGCGGCCATAGAACACAG
Dnajc22	GATCTCCAGGAAGTGTCTCT
Dnajc22	ATGGGGCGGCCATAGAACAC
Dnajc22	TAGGCAGGATGGCTATGGGG
Dpy19l2	GAAGCCATAATGCACATGTG
Dpy19l2	AGTCTGCGTCCTCATAGTGT
Dpy19l2	AGCCATAATGCACATGTGGG
Dpy19l2	ACTATGAGGACGCAGACTTG
Dram1	AGAGAGCACCGCGACCACGT
Dram1	AGCCACGGTCCACTCACAGA
Dram1	CGGACGACCAAGTCACCAGG
Dram1	AGCCTTCATCATCTCCTACG
Dtx1	GAATGGAGCCGACAGTGAGC
Dtx1	GATGAGTCTGCGTTCCCAGG
Dtx1	TGGCCGTGTAGGGTCGCCAG
Dtx1	GATGCAGATGTCCATGTCGT
Dtx3	GTACCCTGGTACCACACGGG
Dtx3	GTAGCTGGGCAGCAGGAGGG
Dtx3	CGGGAGGTAGGCCACCCGTG
Dtx3	CTGTGAGGGCTGCATCACAC
Dusp6	GAAGCCCGAGGCAAAAACTG
Dusp6	GGAAATGGCGATCTGCAAGA
Dusp6	ATTCTCGTCGTACAGCACCA
Dusp6	CGCGTGAAGAGCGCACGCAC
Dynll1	GTTGTACTTCTCCAACGCCT
Dynll1	AACCATGTGCGACCGGAAGG
Dynll1	GGAGTGCGCTACCCAGGCGT
Dynll1	GATCAAAAATGCAGACATGT
Dyrk2	CGGGCTCCGGAAGTGATCCT
Dyrk2	GTTCCGCGAGGATGCAACCC
Dyrk2	AGCCTGAAGCTGGCGAACGG
Dyrk2	ATGGCATGCCCATAGACATG
E2f7	AGCCAGGCTGGTCAGAACAT
E2f7	GTACAGCATGAAGAGTTGGG
E2f7	GCAGGAAACAGAAGAGCTTG
E2f7	AGTGTGTGCAAAAGAGAGGC
Eea1	GGAGACCGAGCGCCAACTGG
Eea1	AGCATTGAACAGAAAGTGGG
Eea1	AGGCAGAGTGGACTCACTGA
Eea1	AAAGCTGGATAACACAACTG
Eid3	GTTGTTTGTGGGCTTCAATT
Eid3	CGGAGTGAGCAGAACCAGAG
Eid3	TGGAGGCAAAGAGAAAAGAG
Eid3	TTCGGCTTGCAGCATCCAGG
Eif2b1	GCTTACAGAGTATTCCAGGG
Eif2b1	GGGAGGTGTAGTCCACCCAT
Eif2b1	TGAGGAGTCCACACCACAGA
Eif2b1	ATTGCAGGAGAAACACTCCA
Eif4b	GATGAAACAGACGATCTGGA
Eif4b	GGGAACCCAGCAATCCAGAC
Eif4b	AGAGACATGGACCGCTATGG
Eif4b	GATTATAGGCGTGATGACAG
Elk3	GAAGAAGTGGCCAAGCTGTG
Elk3	TGGAGAGTGCAATCACGCTG
Elk3	GCTGAGATACTATTACGACA
Elk3	ATCTGCTGGACATCGAACGA
Endou	AGAGTTTGGAAACTGCTGTG
Endou	GAACTGCATGGCCAGGACAT
Endou	GATGAAGCACAGAGAGTAAA
Endou	GGCCATCCAGACCTACACCT
Ep400	GGAGCTTCAACAGAGACAGG
Ep400	GAAGCCTGAGGGTCGCACTG
Ep400	GAAGATAGGCCTGGACTGGT
Ep400	AGGAAACCAGCAGATCACAC
Epyc	AGGATGAAGAATCTACTCCC
Epyc	GAAGAGCCATCGATCAGCCT
Epyc	CAAACGAGGTAGACACATGT
Epyc	AGTGTATGATGCCATCTTGG
Erbb3	GAAGGTCATCAACTCCCAAA
Erbb3	AGAAGTGACAGGCTATGTAC
Erbb3	TGGCACCTAGGATTCCATGG
Erbb3	CATATCAAGTATCAGTACGG
Erp29	GAAGAGCTTAAACATCCTGA
Erp29	AAGGGGCAGGGGGTCTACCT
Erp29	TAGAAAGTGACTGTGTCCAA
Erp29	GGACACAGTCACTTTCTACA
Espl1	GTTGTGGTAGCACAGCACTT
Espl1	GTACTGAGAAACGAGTATGG
Espl1	GCTGTACTGAGAAACGAGTA
Espl1	AGCATCGTACAGCTGATAGG
Esyt1	GACCACTGAGTGCAAACCAG
Esyt1	GCACAAGGGGCACCAACAGT
Esyt1	GAGGAGCTCAACCCTCACTG
Esyt1	TCACTGGGGAGAGACATATG
Faim2	GGGAGCGGGTGTGTTCACGT
Faim2	GGGATGACCAGAAAGTTCGT
Faim2	AGTGAGGTAGGCCATGGACA
Faim2	CAGCAGCTGGACCAATAGGA
Fam186b	ATGTGCTGGGAACAACTAGG
Fam186b	GATAAAGGACAGGAGTTCGG
Fam186b	CGTCCACCACCAGTAACCTG
Fam186b	AGACATCCCCAGGTTACTGG
Fam216a	AGATCTTAGCAACGCTGCAC
Fam216a	GGAGGACTAGACCGTCAGGC
Fam216a	GATGCCGAGCCGTTGGCCCG
Fam216a	GGTGTCTCCATGCAGTACAG
Fam222a	GCCGGGCAGAGGGATCACAG
Fam222a	GTAGACAGGTAGGCGGATGT
Fam222a	GCTGGGTAAGGGTTACGAGA
Fam222a	GTTCTGAGTCCTCTGCAGAC
Fbrsl1	GAACCCAGAGAACATGCCTG
Fbrsl1	GATGAGCTGAGGGTCCGAAT
Fbrsl1	GCTGGACCCCCACAAGCTAG
Fbrsl1	GTCATCCCAGGACACCCCGC
Fbxo21	AGAGTGCTGCCGTCACGTGC
Fbxo21	GAAATCTCGCACCCAGATGT
Fbxo21	GGGATGTCTGCTACTCCATC
Fbxo21	GAAGTTCAAAGGGAACCGCA
Fbxw8	GAATACTGGGAGGTACCCTG
Fbxw8	CGAGCTGTTGATCCTCACAA
Fbxw8	TGTGACGTGCGTTCTCACGA
Fbxw8	GCTATCCCGGATGTTGACAC
Fgd6	GTAGATCACAGAGACACCCA
Fgd6	AGAAAGAGATGACTGGCTGG
Fgd6	GGGCCAGGTTGGCACATCGA
Fgd6	TGGATAGACGCATTTCAGGA
Ficd	AGATCCACAGGAGGGTACTG
Ficd	AGTTGTGGAAGAGCATTGCC
Ficd	TCGTGGAGGAAATCGACCAG
Ficd	GGGGTATGTGGATCCAGTGG
Fignl2	GTAGCGCTTGAGGAGGTTGG
Fignl2	GCTGCGGTAAGGCGCTGCTG
Fignl2	GTTGAGTGGGACAAAATGTA
Fignl2	GTTCGCGCTGCGCTTCTACG
Fkbp11	GGTTACCTGGGATAGATGGC
Fkbp11	GATTCCGTGCACGATTCAGG
Fkbp11	ACCTGGCTTATGGAAAGCGA
Fkbp11	TGCAGTGGTGCAGTACGATG
Fmnl3	GTACTTACATGACAGAACAC
Fmnl3	GAAGTTCCGGAGGAGAGTGC
Fmnl3	GGAGAATGAGAATATGATGC
Fmnl3	GCAGCTGTGTGTTTGGTGCG
Foxn4	GAAGCTGTAGATCTCACTCA
Foxn4	GGGACAGCAGACCTGCATGT
Foxn4	AAGCTGTAGATCTCACTCAC
Foxn4	ACGGCTGGAAGAACTCCGTG
Frs2	GTACACCCGGAAACGGGACT
Frs2	AGTCATAGCCGTATCGTCGT
Frs2	GATGATGATGGGAATGAGCT
Frs2	GCAAAATAATAGTATAAATG
Fzd10	GATCTTGGTGATGCGCAGGG
Fzd10	GCTGGAGAAGAAGCACAGCA
Fzd10	GACCACCCACCATAAAGAGC
Fzd10	TGACTAGGTAGCAAGCCAGC
Galnt4	GATGACAGGACATACGATTG
Galnt4	GAAAGTGAGGACATCCCCGG
Galnt4	ATAGAAGGCGATGATAACGG
Galnt4	GTTATAGAAGGCGATGATAA
Galnt6	GTATACTGTGCGCAGCAGAG
Galnt6	GACGTGGGCGAGAACAACCG
Galnt6	GCTGAAGGAAATCATCCTCG
Galnt6	GTGGAACACAATGATCACGC
Galnt9	AGAAAGGCGGTAGAGCCCAG
Galnt9	GTGAGGACATGCCATGACAG
Galnt9	TGTGAGGACATGCCATGACA
Galnt9	GCCGTCATCTACCAGACACT
Gas2l3	GCACCAGTGAAGAAAGTTGG
Gas2l3	GATGAGAGCAGCTACAAGGA
Gas2l3	CTTCACTGGTGCCGACACAT
Gas2l3	TCGGCACCAGTGAAGAAAGT
Gatc	GAACTTCGGCAGCCGCGAGG
Gatc	GGAGCCCCTAGAGTCGGTAC
Gatc	GAATTCCAATCACGTTGTGG
Gatc	GGTGAACTTCGGCAGCCGCG
Gdf11	AGGTACTGAAGGCCCAACTG
Gdf11	GTACCACGCTACCACCGAGA
Gdf11	TAAGATCTGCAGGTAGACTG
Gdf11	GTTGGCCTGTTGCACCAAGT
Git2	GACCAGCGTAGCAAACTCGT
Git2	GACAGGCGAGAGACTGACGC
Git2	GCAGTGTCCATCGGAGCCTG
Git2	GAACGCTAACATCTGATACT
Gli1	GAATTCGTGTGCCATTGGGG
Gli1	GTATGAGACAGACTGCCGCT
Gli1	CCTGGCTGCAACCATCCCAG
Gli1	ACGCACCTTCGGTCGCACAC
Glipr1	AGGAAATGTAGACATGTCTG
Glipr1	TGTCTGTGGCCATTATACTC
Glipr1	TGGGCAGACAGTTACAAACT
Glipr1	GTATCCGTGAATGCAGCTGT
Glipr1l1	AATGTGTGGCCATTATACAC
Glipr1l1	GTACATGGCATGCCGCTTTG
Glipr1l1	AATACCTGTTCTGAAATGTG
Glipr1l1	TGGGCCAAAACGGTTAAAAT
Glipr1l2	TGAAATTGGCGAAAACATGT
Glipr1l2	GAACTGTTCTCATTACATTC
Glipr1l2	GAACTGTGGCTTCTATTGGT
Glipr1l2	TGGGACAGTTCCTACAAAGT
Gls2	TGACATTGGGTACAACCAGG
Gls2	TGGCTGGGAACGAATTCATG
Gls2	CGGCATCTGCCCTATCACAG
Gls2	TGTGTTCCAGAACAAGACCG
Glt1d1	GCAGTACTGAGGCCTCACAC
Glt1d1	AGATTATAAGGAATATGTAC
Glt1d1	AGGTACAGAGGATCCTTCAC
Glt1d1	GATGGCAGCTGACATGCCCT
Glt8d2	GGTGCCGTATGTGCCACAGT
Glt8d2	GTAGAACACAAGGTTAGCAT
Glt8d2	AGGAAGCTAAACTACTCCAC
Glt8d2	TGAACACTAGGAAAGTCCCA
Gltp	ATGGCCCTGAAGAAGTACCA
Gltp	CGGGACTCACCAAAGAAGGG
Gltp	GGTGGAGAAGGGGATGTATG
Gltp	GGGGCGGAGTGGCCTAAAGT
Gnptab	AGGAAGAGCAGAGAGCCATG
Gnptab	TGATAGGGAAATCCGAACAC
Gnptab	ATAGCAGGGGAACTGAAAGT
Gnptab	AGTGACCATAGTGACCCACC
Gns	GTACTTTCCAGTCAGGATGC
Gns	TGATGACAGTGTCCGCACGC
Gns	GAACTTCAACATCCACGGGA
Gns	TGTGTGGTAGCCGTTGTCTG
Golga3	GAAGGTTGGACAAATGACCC
Golga3	AGAGCCCACAATCTCCAGCG
Golga3	GACAAGGAGGAACTTGACAG
Golga3	GCAACCGACAGGGAGCCAAG
Gpd1	GATGGGGTACCACAAAAACC
Gpd1	TGGGGGGCGGAACCGCAAGG
Gpd1	TGGCTTCGGTGACAACACCA
Gpd1	GAAGTGATTGGGGAGCGCCT
Gpn3	GGGACTTACCGGCCATGACA
Gpn3	TGATGGAGGACGAGTCTCTG
Gpn3	GACTGGCTGGAGAACTGCCT
Gpn3	AGACATCCGGGAGCTGATCG
Gpr182	AGGCTTAGTAGAGAACGTCC
Gpr182	TGACGTAGCGGTCAATGCTG
Gpr182	TGAGCAGCAGCATAGTCACT
Gpr182	GAAATAATGAATGAAGCGAC
Gpr84	GAACACTGCGAAGCACATAC
Gpr84	GCAGTAGAGTAGATCAGCCA
Gpr84	GTCCTAGAGCAATGAGACAG
Gpr84	GATAGCCCAACACAGACTCA
Grip1	AGGACTGGAGCGATCCACAT
Grip1	TGATATCTGAAATGACAAGG
Grip1	GCTTCAATATAGGAAATCAG
Grip1	AGATATCAAGAAAGGCAGTG
Gtf2h3	TGAATCCGAGTCCAGCACGC
Gtf2h3	AAGGATACAGCACAGAGCTT
Gtf2h3	TGACACCAACCCGATTTGGT
Gtf2h3	GCTGTTGACAGTTGCAAACG
Gtsf1	AAGATGATAAGGAAACCTGC
Gtsf1	GAAACCTGCAGGCCCTGATC
Gtsf1	TGATAAAAATCACCAGATCA
Gtsf1	TCATCTTATCAAGTGCAGAA
Gxylt1	GTACAAACTGAACATCACGT
Gxylt1	AGAATGATATGACAACTGCG
Gxylt1	ACGAGGAGCCCAGAATTGGA
Gxylt1	GAACACGAGGAGCCCAGAAT
Hal	CGGACATTGAGGCAGCACAC
Hal	TGGAACATAGGACAGGCAGG
Hal	GCAGGCCGCGAGAAGCTCAA
Hal	GTACACAGTGCACGTGCGTG
Hcar1	GTAGAGCCTAGCCAGCACGC
Hcar1	AGGTAGTAGTCTGTCCGAAG
Hcar1	GCAGATCATGAGGAGAAAAT
Hcar1	CAAAGTCCAGAGGACACAGG
Hcar2	TGAAGAGCATCACACGGCAG
Hcar2	AAAGAAAGCCAGGTCCACCG
Hcar2	TGGGCAATGGCCTTGCCTTG
Hcar2	GAGGTGGACAGTCAGGCCGA
Hcfc2	GTATTCATGAGGATCTACTG
Hcfc2	GACCAGCCACACAAGTCCGA
Hcfc2	GATGATCATCAGCTCCCGGA
Hcfc2	TGTCTCCTCTAACAGCTGGT
Hdac7	AGAGGGTGGACATGACCTCA
Hdac7	GAACGGCACGTGCTCCTCTA
Hdac7	GCTACCTGTAGGGAATACTG
Hdac7	AGGCATCACAGATGGCCGTG
Helb	GATGCCGAGGAACTCTGCAG
Helb	TGATTGTGGACAATGCTACA
Helb	GCACTGGCAACATGTTTACA
Helb	GATGCTGAACTAAATATCTG
Hip1r	GACAAGGTTGTGCTTCACAT
Hip1r	GAAGCCCGCAGGAAATTGGG
Hip1r	GGACAGGCCAGAGAAATCCA
Hip1r	GTGGACATACACCAGCTGTG
Hmga2	GCCCCGGTGCCACAGAAGCG
Hmga2	ATTGGAGAAAAACGGCCAAG
Hmga2	TTGCAGAAAGCAGAGACCAT
Hmga2	TCGCTTCTGTGGCACCGGGG
Hnf1a	GGAAGAGCGAGAGACCTTGG
Hnf1a	GCAGCCGCAGAACCTTATCA
Hnf1a	AGTGCTGTCAGGGTGCTGAC
Hnf1a	AGGGCGGAGTGCATCCAGAG
Hnrnpa1	GATACTATACCTTGGTTCCG
Hnrnpa1	AGGAGCTCTGGCCCTTATGG
Hnrnpa1	TACCGTCATGTCTAAGTCCG
Hnrnpa1	ACTGGCCTCCACCACCATAA
Hoxc10	TGGTCTTGCTAATCTCCAGG
Hoxc10	GGGTAGGAACAGGAGGACAG
Hoxc10	AGTTCGGAGTTACATTGCGA
Hoxc10	GATCAAGACAGAGCAAAGCC
Hoxc11	GGCACGTAGTAAGTGCAACT
Hoxc11	TGTACATCAACAAAGAGAAG
Hoxc11	AAGAAGCGGTCGAAAGCTTG
Hoxc11	GAAGAGAACGATGTTTAACT
Hoxc12	GCTGATCACTAAGATTCAAG
Hoxc12	GATTCCAGTGACTGGCACGA
Hoxc12	GCTCGCGTGGAGGATAGCAA
Hoxc12	GCAGCGAGCACACGTTGTCG
Hoxc13	GAAGCGCGTGCCCTATACCA
Hoxc13	TGGGTAACCATAGCCCAGGG
Hoxc13	GATGCGCCGGCGCTTCTCTT
Hoxc13	ACGCTCCGAGAGGTTCGTGG
Hoxc4	GCTACCTGACCCGAAGGAGA
Hoxc4	GGAATATTACGGCCGGACCA
Hoxc4	ACAACCGCTACCTGACCCGA
Hoxc4	AGAGCGGCTGCGATTTCTCA
Hoxc5	TGTGCAGTTTGGTCATCCAC
Hoxc5	GCATCCAGGTACTGCTACGG
Hoxc5	GTCATCCACGGGTAAATCTG
Hoxc5	GAACTATGGATCGGCCTCAG
Hoxc6	GGTACCGAGAGTAGATCTGG
Hoxc6	CGAGGTGGCAGGATAAGGAA
Hoxc6	CAGCGAATGAATTCGCACAG
Hoxc6	ATGCCTCACTGGATCATAGG
Hoxc8	GGGCGTGAGAGACTTCAATC
Hoxc8	GCGGTCGACAAACTTACAGC
Hoxc8	AGATGCCGGAGGTGCCGTGG
Hoxc8	CGTGGGCAGAAGCCATGCGC
Hoxc9	AGTCCGCATGTAGCGCGTGT
Hoxc9	GGAACGGGCGTGGATCCAGT
Hoxc9	TGTATTTAACCAGGGACCGT
Hoxc9	TGTCCCTCCAGGCAACCCCG
Hpd	AGACTGCGACCACATTGTGC
Hpd	GCTTGGTGAAGATCTGTAGG
Hpd	CGGGTTGGTTGCCTACAATG
Hpd	GACGTGGCTGACTACCTCCC
Hrk	CGGCGCAGGTGACCGCGCTG
Hrk	GTTGCGGCGACGCTCGCCCC
Hrk	TGCGCGGCCGCGCACAGCCA
Hrk	AGCTGCACCGACGCGCCATG
Hsd17b6	TCACCTGGGTCAAACCAATG
Hsd17b6	TGGTCTGTACCATTCAATGT
Hsd17b6	TGAACCTGGGAGCTTCAAGA
Hsd17b6	GACGCAGGCAAATAAGATAG
Hsp90b1	TGTTTGAAACGGCAACACTT
Hsp90b1	TGTGGATGAATACTGCATTC
Hsp90b1	AAACTGGCCAATCAGTTCAG
Hsp90b1	AGTCATCTGTGATGAATACG
Hspb8	AGAGGGCCTGCTCATCATCG
Hspb8	AGAGCTGATGGTAAAGACCA
Hspb8	AAAGACCAAGGATGGATACG
Hspb8	AGAGCGGTGAGTCCCGAAAG
Hvcn1	GTTCTTGAAACACTTTACGG
Hvcn1	GCCACCACTTCGAAGCTCTA
Hvcn1	GGATGGCAAAGCTCATGTAG
Hvcn1	GGACGTACCATTGATGATCC
Ifng	AACAGCCAGAAACAGCCATG
Ifng	GAACGCTACACACTGCATCT
Ifng	GGCTTTCAATGACTGTGCCG
Ifng	TGCTGAAGAAGGTAGTAATC
Ift81	TGGAGCACTGGGTAAATCAC
Ift81	GATAAAATTTAACTCATACA
Ift81	AGAGGAGCTTGAGAGAGTGT
Ift81	TGGATACAGTTACACCCAAG
Igf1	TGGACCAGAGACCCTTTGCG
Igf1	ATGCTGGAGCCATAGCCTGT
Igf1	GATGCTCTTCAGTTCGTGTG
Igf1	TCACTGAAGTAAAAGCCCCT
Igfbp6	AGGAGAGAGGGACAACCGTG
Igfbp6	GGAGAGAGGGACAACCGTGC
Igfbp6	GAGAGAGGGACAACCGTGCG
Igfbp6	GACGGCTGTACAGAAGCCGG
Ikbip	TGATGGCAGGAAAAACCCCG
Ikbip	GCTGGGCGGACCCCCGCACT
Ikbip	GAGCCCGAGAAGCGGAGTGA
Ikbip	ACAATCAGAAAAGTTTGCGA
Ikzf4	GGCCAGTGAGTGCGTCACGC
Ikzf4	TGGAGAGGGAGCTCTCAGGA
Ikzf4	GTCCGGGGGGAACATAAGGT
Ikzf4	AGTTCTGAGATGCAGTTGGT
Il22	TGGAGAGAGTGGAGAGATCA
Il22	ACAGTTTCTCCCCGATGAGC
Il22	AACACAGATGTCCGGCTCAT
Il22	TGTGTTGTTATCTGCAAGGC
Il23a	GCAGAGCAGTAATAATGCTA
Il23a	GCTTATAAAAAGCCAGACCT
Il23a	TGACTCTGACATCTTCAAAG
Il23a	TGCTCCGTGGGCAAAGACCC
Il31	AGGAACAACGAAGCCTACCC
Il31	GGAAGCATTAACCAACATCT
Il31	GAACACAGTAGATACTTCTT
Il31	TGCTATGATGACCGAGATGT
Inhbc	GACGGATATACCTGACATGG
Inhbc	GCATGCCTGCCACATGTAGT
Inhbc	TGAAAGGAGGCAGAGATGCC
Inhbc	AGTCATTCCAGCCAATCTCA
Inhbe	GCTCCTGGAAGTCTACATAG
Inhbe	GACATGGTAGTAGAGGCCTG
Inhbe	GCTGGAAGGTGAGCATGGAG
Inhbe	GTCCTGTGGGGGCCCAACAC
Iqcd	GGAGCTGAGGGAAAGGCACG
Iqcd	ACTCCACCAAGACTGTCCTG
Iqcd	GATGCTGGCCCTCTCCACCA
Iqcd	TGTAACAGCCTGGTGAACTG
Irak3	AGTGTTGTGCAAGTATTGGA
Irak3	GCGGTGGCAGGAAACATCTG
Irak3	GCACAGAAAAACAAGACGAT
Irak3	CAGCCAGCTCTAGTATGTGG
Irak4	GTCATGACCAGCCGAATCGT
Irak4	TGTGAACAACACCATCGTGG
Irak4	TGTAAGCATACACTAAGCAC
Irak4	ATGGCACCCGAAGCTTTGCG
Iscu	CAGCTCCTTAGCCACAGAGT
Iscu	GGCCAGGCTCTACCACAAGA
Iscu	TGGTGACGTCATGAAACTGC
Iscu	AGGCGGCAGGCAGAGCTCCT
Itga5	GATGAGGAACAGTGAACCGA
Itga5	TGACCTGGGCAACCCCATGA
Itga5	GTTGAGGGCAATGTGAATTG
Itga5	GGAGATGAAGATCTACCTCA
Itga7	TAGATGGGGACACAGACCGG
Itga7	TTGGCGTTCAAAGAAGTAGG
Itga7	AGACAAGCTACGGGCCATTG
Itga7	GCAGCTGAACACCACACACT
Itgb7	GCAGAGGGCAGCCTGCAAAA
Itgb7	ACGTGGTGAAAGCTGAAGGG
Itgb7	AGAGTGCTCAAGAGTCACAG
Itgb7	GACAGTGACATACTCCACAC
Kansl2	GATACGGGTAAGGCAGTGTC
Kansl2	GCAGCGCACATCATCCACAA
Kansl2	GCTGAAGGAACGCAGAATGC
Kansl2	GAGTAGAAGCCTTACTACAC
Kcnc2	GTACGTGGAAGGAGTATGTG
Kcnc2	GCACATAGGCGAATACTCCT
Kcnc2	GCACCCTCAGACCTACGAAA
Kcnc2	GTAGTGACCATGACTACCTT
Kcnh3	GCTGAGCGCGAAGTACAGGG
Kcnh3	GCCGATGTAAAACCAGACGC
Kcnh3	AGTGACTGCCACGTAGAGTG
Kcnh3	GGAACCAGGTGGTGACGTAG
Kcnmb4	GATGAAGAGCGACAGGATGC
Kcnmb4	GATCTGCTGCACCGACAGCA
Kcnmb4	TGATTAAAATAGCAAGTGAA
Kcnmb4	TGTGGTGGGTGTTCTCATCG
Kctd10	GAAGTGCTCACGGACAGCGA
Kctd10	GCAGCTCCTCGATCTCCCGG
Kctd10	AGACAGCGTGGTGAGCTCAG
Kctd10	GGGGGTGCCTACTTGTAGGG
Kdm2b	GCCACACACAAGGCACACGG
Kdm2b	GCAGCGGTTCAGGTCGATGC
Kdm2b	AGACCCGCATGCAGACACAC
Kdm2b	GCAAGTGCGAGGCCTGCCTG
Kera	AAGGCAGTAGGGAAACTGGG
Kera	GCCTTATACTGTGAGAACAG
Kera	AGATTACTGAAGGTCCCCTG
Kera	GATTACTGAAGGTCCCCTGA
Kif21a	GTCTCTGTAAGGGACATGGG
Kif21a	TTGTCCATAGGCAAACACGG
Kif21a	GCTGACGCATGCTATCATGA
Kif21a	AGCTGGGAAAACCTACACGA
Kif5a	AGTCAGCTCCAGATTCACTG
Kif5a	GGATCTGGCCGGAAGCGAGA
Kif5a	AGTGAGTTCAGTGTCATCGT
Kif5a	TACTGGTGACAGCTACGTGA
Kitl	GTCAAAACCAAGGAGATCTG
Kitl	ACATACCAAAACATCCATCC
Kitl	AGGGAGCTGGCTGCAACAGG
Kitl	GAAAGAGAGAGAATTTCAAG
Kmt2d	GGACCTGGAGAAGCACACGA
Kmt2d	GATGCCCTCACCGTTCACAG
Kmt2d	TGTGTTAGAGAAGAGAACCA
Kmt2d	GGGGAAGAGTCTCAGCATGT
Kntc1	GCTGAAGATAATGTACAAGG
Kntc1	GACCGAAGGGATCAGCTCTG
Kntc1	GCCATCTCTCAGCTAAATAC
Kntc1	GATGTGAAAACCCTGCTAGC
Krr1	GCAACGCTGGACTTGATCGA
Krr1	AACGACAAGTACCTTCAAGG
Krr1	GTAGCATGTTAAAGCAACGC
Krr1	ATACCGCGAGGCTTACCTGA
Krt1	GAAGAGCTGCAGATCACTGC
Krt1	TGAGTTCGTGACCATCAAGA
Krt1	GTCCATGGACAGGACAACAT
Krt1	AGTGTGCAGGTACCTTGCTC
Krt18	GCAGCTGGAGACAGAAATCG
Krt18	GGACCTCAGCAAGATCATGG
Krt18	CATCCATGGACTCCGCAAGG
Krt18	CTTGACTCTAAAGTCATCGG
Krt2	AGTTGAACCGCACAATCCAG
Krt2	GGTCACTGCTGTGAAACACG
Krt2	GATCAACAAGCGCACGTCTG
Krt2	CCTGAGAACACTCTACGATG
Krt4	GATCCAGAAAATCCGCACGG
Krt4	GCAAGGCTGAGGTTGAATCC
Krt4	GGGGCCTCACCGCTTCATAG
Krt4	AGAAGTCTTTACAACCTCGG
Krt5	TGCCAACCGCAGCCGAACAG
Krt5	GAGGAGCTGCAACAGACAGC
Krt5	GAACCCCGTCCAGCTGTCTA
Krt5	TGAGATCAACAAGCGTACCA
Krt6a	CTTTCCTCTTGTAGGTTGAA
Krt6a	CGACCTACGCAACACCAAGC
Krt6a	GAACATGCAGGACACAGTGG
Krt6a	GAGGAACATGCAGGACACAG
Krt6b	CTGCCTCATAAATAACTCTC
Krt6b	CTTCCTGAGAGTTATTTATG
Krt6b	CTTGGCTTGCAGTTCAACCT
Krt6b	GTCTGCAAGACTATCTGCCT
Krt7	AGAGGAGATCAACCGACGCA
Krt7	AGATGAACCGCTCTATCCAG
Krt7	GTTAGAGTCCAGCATCGCAG
Krt7	GCCGTGCGCTCCGCTTATGG
Krt71	ATGAGGAGGAGATCAACCGG
Krt71	GCTCTCCAGAAGTTTGCGGT
Krt71	AGGGCCACATCAGCAACATG
Krt71	GCTGAGGAATGTGCGTGACG
Krt72	GGTGGAGATTAACAGACGCA
Krt72	ATTGCTGACGCTGAACAGAG
Krt72	TCTGTGTGGGGGGAGGCCGG
Krt72	GCTCTTGTTGACGACAACCT
Krt73	AGGCTGGACTCGGAGCTGAG
Krt73	TGTTCTTGGTATCTCCACGG
Krt73	TGAGGTCCGAGCTCAGTACG
Krt73	TGCCGCATACATGAGCAAGG
Krt75	GCTGCCGAGAATGAGTTCGT
Krt75	GCAGACTGGATGCTGAACTG
Krt75	TGAACTGAGGAACATGCAGG
Krt75	AGAGATAGCAGTTTGTAAGC
Krt76	GATGATCCAGAGACTGCGAG
Krt76	GGGGAGTTACAGACCACAGC
Krt76	ATTGCAGAGGCTGAACAGCG
Krt76	TGGAGCTTTCATGAACAAAG
Krt77	GTTCTGGCGCAACTGCTCGG
Krt77	GCCCTCCAAAAGCTGGCGGT
Krt77	AGAGACTACCAGGCAATGCT
Krt77	TGCACAGAAGAGCAAAGATG
Krt78	GCTTCAAGGGAACAGCATGA
Krt78	AGCTTCGGCAGGCCATACAT
Krt78	GCAGGCAGACGACATGTCTG
Krt78	GTCAACCTCGATCTTCAGTG
Krt79	GGAGCAGAGCCAGAACACGG
Krt79	GTCCATGGACAGTATCACGT
Krt79	GATGTAGATGCCGCATACAT
Krt79	GCTGATCGCCCAGAAGAGTC
Krt8	GTATGAGGAATTGCAGACCC
Krt8	CCGGAGGAAGTTGATCTCGT
Krt8	TGAAGTTCGTGCCCAGTACG
Krt8	CAGGCTCTGGTTCACCGTGA
Krt80	TGAGGTCTGCAATCTCACAG
Krt80	GATGAGAACAGTCTATGAGC
Krt80	GCTCACCTTGCCAATCAGGG
Krt80	GCCCTGCAGGAAGCTCCATC
Krt81	GGGAACTTGGCGGTGAACAC
Krt81	CAGGACACAGCTGAACCACA
Krt81	CTGAACCACAGGGTGCGCAC
Krt81	CCCCTGCAGCGGGAACTTGG
Krt82	GCAGGCAGAAGATCCACAGG
Krt82	GAACAGTGGGGGCTGCAACG
Krt82	GCAGGGGATGTAGAGTTCAC
Krt82	GGTGTCCTGAGGAACAGTGG
Krt83	CCGCCTCGGAGCCTCCTGTG
Krt83	GCTTGCAGCGGGCATCAGTG
Krt83	CCTCCAGGTCTGACTTCCGG
Krt83	ATGTGGACTGTGCCTACCTC
Krt84	GAAGCGGTTCAGATGCTGAG
Krt84	TGACAATCTACGTAGCACAC
Krt84	TCGAGATTGTCACCTACAGG
Krt84	AGTCAAGGCACAGTATGAGG
Krt85	AGAGGCAATCTGGCGCCCTG
Krt85	ATGAAGAAGAAGTTGCACTC
Krt85	GAAGCTGCGTCCACAGGAGC
Krt85	CAGAGGGTCCAGAGGCAATC
Krt86	ATGACTTGCGGATCCTACTG
Krt86	TTTCTGTCCTAGGTACGAGG
Krt86	CTCTCCCACAGGTTGTGTGA
Krt86	CCCCTGCAGCGGAAACGTGG
Ksr2	GGGACGGACACTCTACTCTG
Ksr2	GCAGAAGGAGATCAGGACCC
Ksr2	GATCGCGCAAGAGATTGTAA
Ksr2	GGCGTGGAGCTCATACCAGA
Lalba	GCTCTGAGAAGCTTGAACAG
Lalba	ACTGGTATGAAATAAAACAC
Lalba	GCAACGACAAAATACACACC
Lalba	CCCGAGTCGGAGAACATCTG
Larp4	GGACTAGGACTTATGCTGAG
Larp4	GTAGCAAGCAAATCAAACTT
Larp4	TCAGTTCGTCCCAATATGGA
Larp4	ATGTTGGCAACCGTCCATAT
Lemd3	GAGGCAGATGTATGACATGG
Lemd3	GACCCGGAGATAAGCCGTAA
Lemd3	GTGCAGACTTTCTAGTCTGG
Lemd3	TCACAGTAATGAAAGCACGC
Letmd1	GATGTGTGATGACTTCCGAG
Letmd1	GACACTTGGTGATATCTCGT
Letmd1	GCTGACAGACCTGTGCACCA
Letmd1	GGAGATGGAGCATTTGAGAC
Lgr5	AGAAGGATAAGAAAGCCACG
Lgr5	AGGCCGCTGAAACAGCTGGG
Lgr5	GCAACGTAGAAAACGCATTG
Lgr5	GAATCTTTGGGATTGTTCGA
Lhx5	TGTTCGCGAATGTGGCGCGT
Lhx5	GTCCGGATGCGAGATCATGT
Lhx5	TGCAATAAGCAGCTATCCAC
Lhx5	CGAGTGCAAAACCAACCTCT
Lima1	GATGTGAAACACCTGCTGGT
Lima1	TGGCCAGGAGCCGTTCCATG
Lima1	AGGTGAACACAACCAAACCA
Lima1	AGACGGTGTACCCCATGGAA
Lin7a	GATGCGGGAGATGTAAATCG
Lin7a	GCTGCTATCAGTGAACGGAG
Lin7a	GAAGTTCCACAGCTTTCTCA
Lin7a	GGAGGGGTGGCTGAAAGACA
Llph	TGTGAGGAAGGGCGGTGTGA
Llph	GGTTCATCCACACTGGGTAC
Llph	GAAGCATGGCTAAAAGCCTG
Llph	TGAGGAGATAGCAACCGTGG
Lmbr1l	GATTGGAGAAGAGGAAAACG
Lmbr1l	GGGCCGGGTCTACGAGACAG
Lmbr1l	GCTGTGCACCTTTACCCTGG
Lmbr1l	GGGTCAGGAAGATATGGCAG
Lrcol1	ACAGGTCCCAGCATTCAAGG
Lrcol1	GGGCACACATTCCAAAAACA
Lrcol1	GCAGTGTATATCTTGGCGCA
Lrcol1	ACATTCCAAAAACACGGTCT
Lrig3	ACGGATGGTGAGGTCCATGG
Lrig3	CGAGCAGGTAAAACTCACGT
Lrig3	GAAAGATGACAGCCCTTTGG
Lrig3	CGTGAAGATCGAGGACATCG
Lrp1	GAAGGCCTGGCCTATCACCG
Lrp1	AGAGCAGATGATCTACTGGA
Lrp1	GCACGTCAGATGGAGATCCG
Lrp1	GCTCCATCCAAGCATCATGC
Lrrc10	CGACCGCTGCCAGAGTTATG
Lrrc10	GGTCTCCCACCACATAACTC
Lrrc10	GGGCATGCGAAGCAGTACCG
Lrrc10	TCAAGGTACACACCACCCGG
Lrrc43	TGAGCACAGACACTCCATGC
Lrrc43	GACGATTGGAAATGTCAGAG
Lrrc43	GCTGCACCAGTACCGCTCGG
Lrrc43	TGTCTGCGCGAATTCCCGTG
Lrriq1	TGAGGAAAGGAGACTAGCTT
Lrriq1	AAATGCTGAGCAATTAATGA
Lrriq1	AAAGCACAGGTAATGATCAG
Lrriq1	AGGCACGTTTATTCAAACTG
Lrrk2	GGGCACCTGAAGTTGCCAGG
Lrrk2	GAGTCCAGGACAATCAACAG
Lrrk2	GTCTCCAGAAGCATACTGTC
Lrrk2	TGTACTTTGTGGAACCCAAG
Lta4h	TGGAGGAATAGGCTACATCG
Lta4h	GGTGTGGTCCGAGAAAGAGC
Lta4h	GCAGCGTCGACTTCGCTCGC
Lta4h	GAAATTAACGTACACCGCAG
Lum	GTTGTGTTGAAGATAAATGA
Lum	GTTCATTGTGAGATAAACGC
Lum	TTGATCTTGGAGTAAGACAG
Lum	GCATCAAGTACCTTTACCTG
Lyz1	GATCTGAAATATCCCATAGT
Lyz1	GGTCTACAATCGTTGTGAGT
Lyz1	AGTCAGCCAGCTTGACACCA
Lyz1	TGGCTACCGTGGTGTCAAGC
Map3k12	GTGCTATGGGAACTACTGAC
Map3k12	GGGTGTAGAGAGCACATCAG
Map3k12	GGAAATCCTGGACCTGCAGT
Map3k12	CGCTCAAGGACAGCTATATG
Mapkapk5	AAAGTCACATAATTTCACAG
Mapkapk5	AGCCTGGGGGAGGATACACT
Mapkapk5	ACATAGTAAGGGGTAAACTG
Mapkapk5	TGGTGTTTGGAGTAAAAAGG
Mbd6	GACCAAGGGCAGGTGCATAG
Mbd6	GACTTTCTGACTATCCCCGG
Mbd6	GAGGCAAGGAGATTGCTAGG
Mbd6	GCTCTCGGGGGGCAGACAGG
Mcrs1	GATGGGCGACCAGTGCTGTG
Mcrs1	GAACTTCCCGAAGGGTGAAG
Mcrs1	GATGGGCCGCCGGCCCTCGT
Mcrs1	GATGACAGGGTCGTAGAGCA
Mdm1	GACACTGTGGAAAAGCACCA
Mdm1	TGAGAGAACTCGGTATCCAG
Mdm1	GGACTTAGATCGGATCAGTT
Mdm1	CTTACAGGAAGCGAGTTCAG
Mdm2	GATCAAAGGACAGGGACCTG
Mdm2	GTTTCTCTGTGAAGGAGCAC
Mdm2	CACACGTGAAACATGACATG
Mdm2	GCAGATCACACATGGTTCGA
Med13l	GATGACCCTCAAGAACCCGG
Med13l	AGTGGACACAAAATACCCAA
Med13l	AGGATGCCAAGAGCCAGCGC
Med13l	GCACCACGAAGTGGACGGGA
Metap2	GACCCTTTAATGTCACACAG
Metap2	GAGAAGCTGCGGAGGCACAT
Metap2	TGTCCATTTAAGTTACGTAT
Metap2	GTTGTTGAGAGAACACCCAG
Mettl1	GCAGTGTGTGGTCTGCCATG
Mettl1	CACCCCGACTCTCAGCACGT
Mettl1	GAAGGTGTCGGACTATGTGC
Mettl1	CGCCCCCGGGAGCTGCACGG
Mettl25	AGGGTCAAACAACTTCACGA
Mettl25	GATGTGCTAACGAAAACTGG
Mettl25	ATGGTGGGACTGCATACCTG
Mettl25	GCAGTGATGAAAGAGGTTAG
Mettl7a1	TCAAAAAAAAGGAACCAGAC
Mettl7a1	GTGGGGCCGCACCAATGTCC
Mettl7a1	AGCAGATGGCGAGCCAAAAG
Mettl7a1	CATCTGCTCATTGTACATCA
Mettl7b	CTGCACAGAACATAGCACCA
Mettl7b	GACCTGGAAAGACATTGAGA
Mettl7b	GAGCCTACCTGGAAACACAT
Mettl7b	GTAGAACTGGAAGTTGGCAC
Mfsd5	GCAACATAGAGAGTAAGTGA
Mfsd5	ACGACCCAGCCAGTCCACAA
Mfsd5	GGTACAGCGAAGAACCCAGA
Mfsd5	GCAAGGGAAAGCAGGTGCAT
Mgat4c	TGAGTCAATAGCCAATCGCA
Mgat4c	ATCCTTGGAAGGAACATACT
Mgat4c	AGGAACAGAGAATAAACTGA
Mgat4c	CATCCTTGGAAGGAACATAC
Mip	GATGGCAGGAGCAAAGGAGC
Mip	AGTGACCGCAGGGTTGACAT
Mip	AGAGGAGAAAGTCATAGAGT
Mip	GCTACATTGGTGCAGACTGT
Mlec	GGAGGAGGGCGACTATGTGC
Mlec	AGTCTGTGCACTCTACATCC
Mlec	GTCATCTGGGCAGTGAACGC
Mlec	GATGTATAGCTTCCCTGTGA
Mlxip	GCTCAACAACGCCATCTGGA
Mlxip	GGGGTGACAAAGTGGCACAC
Mlxip	GCTGTATTGGCATAAACATG
Mlxip	AGGGCCTGAAGCTCCAGTGG
Mmab	GAAGCTCTTCGGCAAACATG
Mmab	AATACCTACAGGCAGAATGA
Mmab	AGCTGAGCTTAGCTCATCCG
Mmab	CAGTGCATGCTACAGGACGT
Mmp17	GCCACCAGGAGACAGATACT
Mmp17	GCTGCAGCGACACCAAGTGT
Mmp17	GTCACCAGGGAAGAATGCGT
Mmp17	GCAAGAGGAACCTTTCTTGG
Mmp19	GGATCCTCCAGACCACAACG
Mmp19	GGCTCCTCTGACCTTCCGGG
Mmp19	GCAGGGATCCAGGCTCTCTA
Mmp19	TGGGCACTCCCGATATACCC
Mon2	TTGCAGTGGAGTCGATACAC
Mon2	GGACATGAGTCTCTGGATGG
Mon2	GGCAGGGAAGATCTGAACTA
Mon2	AGACACGGCAGAGAAGCAGT
Morn3	GCTGTTTGAAGGCTACTGGG
Morn3	GTGAACGGCGATCACTACGT
Morn3	GAGAACGGGAACCGGTATGA
Morn3	GAACCGGTATGAGGGCATCT
Mphosph9	AGAACTTTGGAAGAGTTGCG
Mphosph9	GCTGACTTACTGGAAACTGG
Mphosph9	AGACAAGACCTACAGAACAG
Mphosph9	AGAAAGATAACACCATCACT
Mrpl42	GTACTTTGGTGTGTTCGTAG
Mrpl42	GATGGACTTACTGTCCGTGC
Mrpl42	GCACACTATTGTCCTGCCGT
Mrpl42	CATGATAGAACAACTGAGCA
Msi1	GCTGTCTGTGAACACCACGG
Msi1	GAACTGGTAGGTGTAACCAG
Msi1	GAAGGGCTGCGCGAATACTT
Msi1	GGACGAAGAAGATCTTCGTG
Msrb3	TGAGTGACATGGTACTGTAG
Msrb3	GCAACCTGAGGGGAGCCCGC
Msrb3	GGTGGAAACCAGCTGTTCTC
Msrb3	TTCCTACGGGATGCACAGGG
Mterf2	GCAGATGGTCTGCAAAAACG
Mterf2	GAACAATAAACAAATGATAG
Mterf2	TTGACATTAGAAAAATCCGC
Mterf2	AGAAGCAGGATAACATAGAA
Muc19	AGTTCCCCAAGACTGTACAC
Muc19	GTAGGTGAAGCAACTATGTG
Muc19	GTCCTGGTGACTATGAACAC
Muc19	GAAGTTGCCGCAAAGACCAC
Mucl1	GACAGATGATAACATTACCA
Mucl1	ATGATATTGAATAACATTCA
Mucl1	GATACCTCCAATAACATAGA
Mucl1	GCCTCTGAGGAGGACAAAAA
Mvk	GGACAATGCCGTCAGCACCT
Mvk	GGACTGCACAGCAAGCTGAC
Mvk	GCAGCGGGGCCACAATCTCA
Mvk	GCACCATCTGAATGCTCTCG
Mybpc1	GGAGATTGAATGCAAACTGG
Mybpc1	GAAGGCCGACAAGAAAAGCA
Mybpc1	TCGGTGGTAATGTTCAATGA
Mybpc1	GTCTTTGCTGAAAACATGTG
Myf5	AAGCTTTGCAGGCCCACATG
Myf5	GGATTGCTTGTCCAGCATTG
Myf5	CGAGCGTAGACGCCTGAAGA
Myf5	GGGCCTGCAAAGCTTGCAAG
Myf6	TGCAAGCCCAGATCAGACAC
Myf6	AGTGTTTCGGATCATTCCAG
Myf6	TGCCCAAGGTGGAGATTCTG
Myf6	TGAAGAAATACTGTCCACGA
Myl2	AGATTGCCGGTGACGTCAGG
Myl2	AAAGCCAAGAAGCGGATAGA
Myl2	AGCAGAGAGGTTCTCCAAAG
Myl2	GGGCAGCAAATGTGTCCCTT
Myl6	TGAATCCTCAGAATTCAAGG
Myl6	CGAGCAGTGTGACTTCACCG
Myl6	GACCCTTACCCAGTGTGACT
Myl6	TTCACCGAGGACCAGACCGC
Myl6b	GCTTAGGATATGCTTCAGGA
Myl6b	GGAAGAGGTAGAGACTGTTC
Myl6b	ACTTTGGAGAGATCAACAGG
Myl6b	GGATCTTGCCATCACCTACT
Myo1a	GGAGAAGAAGAAGGTTATGG
Myo1a	TGGTCCAGGCGCGATACCTG
Myo1a	TGATCAACTACTGCAATGAG
Myo1a	GAAGAGCCAAATCCTCATCT
Myo1h	GCAGTGTGAACACATATTTG
Myo1h	TTGGTGGAAGAAAGACACAG
Myo1h	GCTTTACAGACACCTGAAGG
Myo1h	GTATGAATCTGAAGGCATTG
Myrfl	GTACTGAACAATCCTCATCT
Myrfl	AGTGAAGGAGAACATTCAGG
Myrfl	TGCAGCAGAATGCTCCACTG
Myrfl	CGGGAAGCCTCCAAATGTGC
Naa25	GTTAGTCACAAAGCTCTATG
Naa25	GATGTGCTTAGCATCGAGAC
Naa25	GACCCAGGGATGCAGCATAT
Naa25	CAGGTGAGGAGACTGCGGTC
Nab2	GCCACAGCTGACCATCAACG
Nab2	GCAGAGGGGATAACACACGC
Nab2	GAGAATGGGCCACCAATCCA
Nab2	AGGTCTCGTAGTAAGAGAGG
Nabp2	GGTTGTCTGACACTGTACAC
Nabp2	AGGCCGGGTGACCAAGACAA
Nabp2	GGGCAACCTGATCCAACCTG
Nabp2	CGAGGTTCGGACCTGTAAAG
Naca	GGCTTCCCCAAACACTATGT
Naca	GGAAGTTAAGGACATAGAAC
Naca	GACGGCCACGCAGCAAGCCC
Naca	CATAGTGTTTGGGGAAGCCA
Nap1l1	GATAGAAGCCAAATTCTATG
Nap1l1	AGATCAGTGCTGTACTTCAC
Nap1l1	TGAAGTACAGCACTGATCTT
Nap1l1	AGTTCCTGAGAATGGCGATC
Nav3	GACGCGAGACAGCAGCTCGG
Nav3	TGACTGGGCCAACCACTACC
Nav3	GTCCTGAGAGGATAATTCTG
Nav3	ATGGCAGAAGGGGAGACCAA
Nckap1l	GGACTCAGTAGAGAAAATGC
Nckap1l	GCACCTCAAAGAGTTTCTGG
Nckap1l	AGAAGGCCTAAGGATCTCCT
Nckap1l	TGTACGTCACAATTAAGTCC
Nckap5l	GTTCAGTAGCTGTTGCATGA
Nckap5l	GTTTCCACCACGCACTTCAC
Nckap5l	AGCGTTCGTAAGTCTCCCGC
Nckap5l	TTGACTCGAACCTTGGACAG
Ncor2	GTAGGCAAGGCGGTCGATGG
Ncor2	AGGCATCAAAGGTCACCAGA
Ncor2	GCTTCCAGAGGGATCCCTCG
Ncor2	GAAGGAGGGTTCCATCACCC
Ndufa12	GACTTCGCTTACCACTCAGG
Ndufa12	GAAGCATGGTGCCTCCTGAG
Ndufa12	TGGTGTAGATGACCCATCGG
Ndufa12	CGGTGGTGTAGATGACCCAT
Ndufa4l2	AAGTCGCAGCAAGTAGAGTC
Ndufa4l2	AGATGGCAGGAACTAGTCTA
Ndufa4l2	TTGGGACTCAGGCGGTTCCA
Ndufa4l2	AAGCAGATGAAGCCAATCAT
Nedd1	TTCCAGTGGTGACAAAATAG
Nedd1	GTTGAGGAGCCGTTGACTGA
Nedd1	AATGAAGCGGATCTGGACTG
Nedd1	TGGCTATTGGATCTTCCCGT
Nell2	TGGACGGGGGATACGATTGC
Nell2	GTACAACAGCGGCGACACCT
Nell2	AGCAAGGAGAAGTTGACTGT
Nell2	GAACGTTCTCAGTAACACCC
Neurod4	GTTGGAGGCATCCAGCAACC
Neurod4	AGTCTCCAGGACTTCAGACA
Neurod4	AAGTTGCCACTAATGCTCAG
Neurod4	AGAGAACGGACCCGGATGCA
Nfe2	TCGACGGGGCAAGAACAAGG
Nfe2	GGAGGCTGACCGCACTCTGG
Nfe2	CATCTGGATGAATTGAACAG
Nfe2	AGGGTATGGAGGCTGGCAGG
Nfyb	GTAGCTGTCAAAGCCTAGAG
Nfyb	GGGATTTCTGCAGACTACAT
Nfyb	ATTTCTGCAGACTACATCGG
Nfyb	TGCAGAAATCCCTAGCTGGG
Noc4l	GCAAGTTGCAGATTAAAGGC
Noc4l	GTCCCACTTACCCACATCAC
Noc4l	GGGAGCCACATACAAATACA
Noc4l	AAAGCCCGTTCAAGGCCAGG
Nos1	GATGTAGTTGAACATCCCAT
Nos1	GGGCACAATCCACACCCAGT
Nos1	GCCAGGAGGAGCACACCCCG
Nos1	ATGGGGCAAGAACCCCACAA
Npff	GAATTGGGGCCACACTGAAG
Npff	AGTATGCCCACATTCCAGAC
Npff	AGGCCATGGACACACCTAGA
Npff	CTGGAGCAGAACACGAAAGA
Nr1h4	GAACGGGGGCAACTGCGTGA
Nr1h4	CGTCAGGCGACCCAGGAGGC
Nr1h4	GTGTACAAGTGTAAGAACGG
Nr1h4	TGGGTCGCCTGACGGAACTC
Nr2c1	GCAGGAGAACAGCATATCAC
Nr2c1	GCATGAGTACGCCTACCTCA
Nr2c1	CCTGAATGTGCACTACATTG
Nr2c1	GATTCTTTAAAAGAAGCATC
Nr4a1	TGATTGGATTGACAACATCC
Nr4a1	GATGAGGGAAGTGAGAAGAT
Nr4a1	TGCTTCGTGTCAGCACTATG
Nr4a1	TGATGAGGACCAGAGCGGAC
Nt5dc3	GTCGTAATGGAGTCCCCGGA
Nt5dc3	GAAAGGCCAGATTTACAAGC
Nt5dc3	GTGCTTGGAATAGAATACCA
Nt5dc3	TGACCACATCTACAGCGATC
Ntn4	GTAGAAGCAGAAGAGTTCGG
Ntn4	GTACAATGACCGGCCCTGGG
Ntn4	TGTACAATGGTGCACAGTGC
Ntn4	GGATCGCCGATCCAACCGGG
Nts	GAGGCTGCAAACATTTAGCA
Nts	GACAAACATGCATACATCCA
Nts	GCAGCAGGGCCTTTCAACAC
Nts	CAGGGCCTTTCAACACTGGG
Nuak1	GCACGGCAGACACAATCTGC
Nuak1	GGACATCGCCAACCATTGGT
Nuak1	TCGGCCTGAAAACCTCTCGG
Nuak1	TACCTTGTGACAGTAATGCA
Nudt4	GCAGTCGGTACCCAGACCAA
Nudt4	CGAGGGCTTCAAGAAGAGGG
Nudt4	GCTGGAGTCAAAGGAAAGCT
Nudt4	TGCTGCTGGTGAGTAGCAGT
Nup107	AACAGGAGATGGTCACATGG
Nup107	GGGTGCGGAGAAACAGAATG
Nup107	AGAAAGTTACCTGTACAAAG
Nup107	GAAGCAGGAAGCACAGCATG
Nup37	TGAGTGACGACCACACCTGC
Nup37	GGAAACCTGATTGCATATGG
Nup37	CAGAGAAGAATGGAACAATC
Nup37	AAGAAATGCTGCGTACACCG
Nxph4	GGGCTTGGCGCAGAGCCAGG
Nxph4	TTGGCCGGCTAACCACACCG
Nxph4	GTTGGTGACCGGCAAGATCG
Nxph4	CCAGGCTGGACGAATTGTGA
Oas1b	GCATGGGTATTGCAGCCAGG
Oas1b	GACCCAACAAGGAACATAGC
Oas1b	CGACAAAAGAGATACTTCGT
Oas1b	AGTTATCGATCTGCTTTATG
Oas2	TGGACCTGGTTATAAAATAC
Oas2	TGACAGAGGAAGCTATGGCC
Oas2	AGAGTCGTAACTCTCCAGCG
Oas2	GGAGTGACGAAAAGTGGCAT
Oas3	GTCGCTTTGTATCTACTGGA
Oas3	AAAGATGGTAAGCAGCTCTA
Oas3	GGATCCAGCTGATCCAACGT
Oas3	AGGAGCGAGGAGTACACCTG
Oasl2	GTTTACGAGGAGCTCCATCA
Oasl2	GCTCTCTGTACCCATCTCCC
Oasl2	GCTGCTGACCATCTACGCCT
Oasl2	AGAGCAGGCGAGAAACCGGG
Ogfod2	CAACACCATGAACAACCATG
Ogfod2	GGCTCTGGTATCCTGCACCG
Ogfod2	GAAGAGGCCCCCAAAATACA
Ogfod2	CGTACTTGACCACAAAGGCA
Olfr765	GCCAAGAGCAGAGAACCAGA
Olfr765	TAATGCTGACCAGGACCCTG
Olfr765	TGACTCATCAAAGTGATGGG
Olfr765	TGTGAAAGAAATTTCTAGGA
Olfr767	CTCTTGGCTAGGTGGGTTGA
Olfr767	CAAAGTGATGGGAGGTATAA
Olfr767	AGCAACTGAAGTAATGAGAA
Olfr767	GCCAAGAGCAGAGAACCAGA
Orai1	AGACGATGAGCAACCCTGGT
Orai1	GATCGGCCAGAGTTACTCCG
Orai1	CAGGCCACAGGGAACCATGA
Orai1	CAGACCATGACTACCCACCA
Ormdl2	GAACAGTCGGGGCATCTGGC
Ormdl2	GATGCTGAGGAACTTTCGCG
Ormdl2	GCTGAGGAACTTTCGCGAGG
Ormdl2	GCAGCGAGGCAGTGTTGATG
Os9	CGTGCGAATGGTCAGTACGT
Os9	GTAAGGAAGAGGACACACGC
Os9	CGGGAGAGCCCCACACCCGG
Os9	GCTGGAGAGCAACTACCGCC
Osbpl8	GTAGCTGCTAGGTAGAGGCT
Osbpl8	AGCCCCGACCTTCAGCCAGT
Osbpl8	TGGGATGAATCCATAAACAT
Osbpl8	CGGCATGGACCTATCCAGGG
Otogl	GGAGCCTCAGTACACAGTAT
Otogl	AGTGGGCGAGAGCGTTACAC
Otogl	GCACACCACGCTGACCACAC
Otogl	GATGGGATTTGCAAAACCTG
P2rx2	GACCCTGGGAACATGCCCAG
P2rx2	AGTCAAGGGGATCACCATGT
P2rx2	GATGAGGATGGTGAAATTTG
P2rx2	GAACTCTCATCAAAGCCTAT
P2rx4	GTTCACGGTGACGATCATGT
P2rx4	AGGCGCCGGAAGGAATATCT
P2rx4	CTGAGCTGGGACCACATAGT
P2rx4	CGTGTGGGAAAAGGGCTACC
P2rx7	AGTGCAGACGCTGTGTCCTG
P2rx7	TGAGCGATAAGCTGTACCAG
P2rx7	TGATAACAGGCTCTTTCCGC
P2rx7	GGCACTCACCTGCAAAGGGA
Pa2g4	GTCCTGGTCACTCTTCAAAG
Pa2g4	GATGAGAAGAAGGCTCGAAT
Pa2g4	GTGACCAAGTATAAGATGGG
Pa2g4	AGGGGACCCAGGTAACAGGG
Pah	GATGTGGTTGTGCTCGTAGC
Pah	CGAGACAAGGAAAAGAACAC
Pah	AAGAGCCTGAGGAACGACAT
Pah	GATATCTGTCATGAACTCTT
Pan2	GGAGAGTGTGAAGAGTAGGG
Pan2	GAAGTGCCCCAGGCTTATCG
Pan2	ACGAACAGGCGGCAGCTTGG
Pan2	TGATGACTACATCTCCACGC
Parpbp	AGTTCTGAAAATGCCCACGT
Parpbp	GTCACCATCAGATCCTCTGT
Parpbp	AGTGAATTCAAAGAATGACC
Parpbp	GGCGCATGTAAAAGGCCTGT
Pawr	CGGCGTGGTCAACATCCCCG
Pawr	GGGGCCGTGGTTGAGCTCCG
Pawr	CGTGGTCAACATCCCCGCGG
Pawr	GCATCAGCCTCACAAGTCGA
Pcbp2	GCCAAAGTGATAATTCTCTC
Pcbp2	GATCAGTAGATCCTTCCACT
Pcbp2	AGGGCGTGACCATCCCGTAC
Pcbp2	GATCAAAATTGCAAACCCAG
Pced1b	AGTAGAAGCGCACCAGATGG
Pced1b	GGAAGTAGAAGCGCACCAGA
Pced1b	GTTCATAATGATCACATCTG
Pced1b	AGGGTGGCTACCGAGATCCG
Pde1b	GCACCGATCGATCATTGTAC
Pde1b	ATGGACAGTCTGGGTCACGT
Pde1b	GTGGAAGTGCGATCACAGAG
Pde1b	CTGGGACTGGGCCACCAATG
Pdzrn4	GTTAGCAGTCAAGAGAAGCT
Pdzrn4	GATTCTCTTACACTCATCGC
Pdzrn4	AACTGCCAAGGAGCCCATAG
Pdzrn4	TAGTGGTACAGGTGTTAAGG
Pebp1	CGTACACCAGCCAGACATAG
Pebp1	AAGGGTAATGACATTAGCAG
Pebp1	TACTTACCTGTGCCACTGGG
Pebp1	ATGGGCTCGTCGCAGCTCAG
Pfdn5	TGTGGGAACCGGCTACTACG
Pfdn5	GGTGGTCCAGACCAAGTACG
Pfdn5	AAGGATACAGAACTCGTCAG
Pfdn5	AGGATACAGAACTCGTCAGT
Pfkm	GAAGTGATGGGCCGCCACTG
Pfkm	GGGGATCTTACCCACAGTGG
Pfkm	TGGGTCAGACTTCAGCATCG
Pfkm	CGGTGGCGAGCACATCAGGG
Pgam5	GATGAGGAAGATGTGCCTTG
Pgam5	ATTGGGTCGAATCACCAGGT
Pgam5	CTTACCTACAAACAATATAG
Pgam5	AGTCAGCACAGACTTGCTAC
Phlda1	GTAGACTGCGTGGAGCGCAA
Phlda1	ACTCGCAGGAGACAGAGCGG
Phlda1	AAAGTGCTGCATCCTCACCG
Phlda1	CAAGTACATGTACTTCACTG
Pip4k2c	GGTACCATAGGAGCCCACCA
Pip4k2c	GATGACCAGAGTGCGGTCAT
Pip4k2c	GTAGCCTCCGATACCCTCAG
Pip4k2c	GCATAGGAAGTATGACCTCA
Pitpnm2	CAGCAGAAAGGAGACCACGT
Pitpnm2	TGGGTGGGCAGGGCACCAGG
Pitpnm2	GCCCACATGATACACCTTGT
Pitpnm2	AAGGTGGAGTTCCGATACTG
Piwil1	GATGGGAGGCGAGCTCTGGC
Piwil1	GATGTTATAGAACTGCAGGC
Piwil1	GTACAATAACAAGACCTACC
Piwil1	GTTCTCATACTGAAGGATGG
Pla2g1b	GGAACTGCCACACAGCCCGA
Pla2g1b	CCTGTCTAAGTCGTCCACTG
Pla2g1b	GCATGAGTAGGAGTAAGTGT
Pla2g1b	TGTAGCAGTGGTCATGAGTC
Plbd2	GGAGTGGATACGAAATGTCG
Plbd2	GGCGTCCAGCAGCAGCGAGC
Plbd2	GGCGGCCAGTGGCCCCACGT
Plbd2	GCTCTACAAAACGACCTACT
Plxnc1	GGAACTATCAGGGAACAATG
Plxnc1	GACGTCTGTTTATGGCACCG
Plxnc1	GGAACGAGCTTGTAGAACAC
Plxnc1	CGGCTCCGGCAGCACATAGG
Pmch	GAAGAGTCTACCGACCATGT
Pmch	GATCCTTTCAGAGCGAGGTA
Pmch	AACAGAATCTTGTAACTCAC
Pmch	AAAAGCCAGCATTAACATGT
Pmel	GCTGTACCCCGAGTGGACAG
Pmel	GGCAGCCTGCAGTACCACCT
Pmel	GCACTTGGTGTAGAACCAGC
Pmel	GCAATGCTCAGCCTGGACAC
Poc1b	TTGTGGCGAGAACTGCAGGC
Poc1b	GCTAGAGCTTACAGATACGT
Poc1b	AGAAAGGACATCCACCACGG
Poc1b	CCTGTATCGACACACACACT
Pole	GCTTTCGGGAGATGATATAG
Pole	AGAACTATTGATCTCCACAG
Pole	GGTCAATGGAGAGGCGAATG
Pole	GCTCACCTGAAACAATCATG
Polr3b	GAAGGGTTCAATCTCCAAGT
Polr3b	TGACAAGCGAGACAGCACCT
Polr3b	GAAAGGACACACCTGCATCT
Polr3b	TGGAACAGAGGAGCACGTGA
Pop5	GAAGAGCTGACCACACGAGC
Pop5	TTCTTCAACACATTACACGT
Pop5	CTGGATCAGGAACTTCTGAC
Pop5	GCCGAAGGCCCCGTGCACCC
Pou6f1	GCAGATGGCTGATTGGCTGT
Pou6f1	GGAGCTCAACTACGACCGGG
Pou6f1	AGGCTTTGACGGCGACAGAA
Pou6f1	GGGCTGGTGAGGATTACTGC
Ppfia2	GTATTGAGGTAACCCCAGGC
Ppfia2	GGGAATGCCAGCTTGGTACG
Ppfia2	TGAATACCGCAACTCAGTGG
Ppfia2	TGAACGGTCACTAAGAATGA
Pphln1	GAAAACCAAAGAGATTGAGC
Pphln1	AGACTGCGAGACTTTCGGGA
Pphln1	CGAGATAGGTGAGCGCTGCG
Pphln1	AGGCGTTAGACAAACCCAGC
Ppm1h	AGTGCGTATAATATATCTGG
Ppm1h	TATATATGGAGAAGGCAAGA
Ppm1h	TGAGGACCAAGCCAGCTGCG
Ppm1h	GCAACTATTGGAGTGACGAG
Ppp1cc	GCTCACCTTCCAGCAGCCGT
Ppp1cc	GCAAGAGGCAGATTGTCTCC
Ppp1cc	AGCCACCGTATTCAAACAGA
Ppp1cc	CACTCACCACATATCTTGAG
Ppp1r12a	GGGGTAAAGAAGAAGCATGT
Ppp1r12a	GAAGGAGAAAGACACTGCAG
Ppp1r12a	GGGCACAGCACTCCACGTGG
Ppp1r12a	AAGAGTCAGTATCTTCTGGG
Ppp1r1a	GGAATCCAGTGGTAGCATGT
Ppp1r1a	ATCACTGGTCAGCACAAGTG
Ppp1r1a	GATGCCAAACCTTTCATGGT
Ppp1r1a	TGGTGTGGAGCCCAGAACAG
Pptc7	TAGCAGCACAGCCTGCATCG
Pptc7	AGGGTGGAGAGACTATGGAG
Pptc7	TCTGTCCAGCACCACGATGC
Pptc7	GGGGGACTCACCCAGGACGT
Prdm4	AGAACTCCAGGACACCAGTG
Prdm4	TGTTGGCAGATATACCACAC
Prdm4	GGTCCGAAGCAAGTCCGCAC
Prdm4	AAGGCGAGATAAAAGCCTGG
Prickle1	CAGGATGGAAAAATCCACTG
Prickle1	TGAGTACTGCGAAACCTGTG
Prickle1	AGGGCAGAGATATATCATGA
Prickle1	GACGAGTGCACGGAAGCCGA
Prim1	TTCCTGAATAGACCCAGAGG
Prim1	GCCTCTGGGTCTATTCAGGA
Prim1	TGGATTTAAGCACCGCCTCT
Prim1	AAGGAGAGGTGTGCACTGTT
Prkab1	TGGTGCTCAGTGCAACACAC
Prkab1	TGATGGAGAGTGCATAGAGG
Prkab1	CCTTGATGGAGAGTGCATAG
Prkab1	CCTGTCCATCGAAACACGGT
Prkag1	GCAGCGATGAGACTTCATGA
Prkag1	CTTGTGAGTAAGGATGTACA
Prkag1	GGAAACCATCATCAATAGGC
Prkag1	AGTGTCAAATACCACCAACT
Prpf40b	GTAGTAGATGCGCCCGTCAG
Prpf40b	TAGAACTTGAACAAGTCCAA
Prpf40b	TGATGATAAGCAATCCGTGT
Prpf40b	GTTCGCTTTGCCAACATGCT
Prph	TGCACAGTACGAGAACATCG
Prph	AGTGAAGCCAGAGCTGACGG
Prph	GATCCAGAGTCTGATGTGCG
Prph	AGAAGAAGAAACCCGCAAGC
Prr13	GATAAGGGGGACGACACGGA
Prr13	GACATGTGGAATCCTAATGC
Prr13	GGATAAGGGGGACGACACGG
Prr13	CAGGAGCCGGAGGATTCACG
Psmd9	TGTGGTGCAGCATAGCGAGG
Psmd9	GGACTGTGAGGGCTATCCCC
Psmd9	GAACCGCTGGTGGACTGTGA
Psmd9	CGGTTCCCCAGCCAGTATTG
Ptges3	TAGATGATGGATCACATGGG
Ptges3	GTCATGGCCTAGGTTAACAA
Ptges3	TGTTTGCGAAAAGGAGAATC
Ptges3	AAAAATCCAAACTTACTTTC
Ptpn11	GAAACACAGAGAGAACCGTC
Ptpn11	AGTGTTCTGAATCTTGATGT
Ptpn11	CTGACAGCGGATCATGACGT
Ptpn11	AGAGAACGAAGTCTCCGGGG
Ptprb	GAAGTGGCAGAAACCCCCTG
Ptprb	GAATGTGGAACAATACAGGC
Ptprb	GATGCCTGGACGGAATTACA
Ptprb	GGACTCCGTGGACATTTATG
Ptprq	GTAACTCACAGAAACATAGC
Ptprq	ATGGACTAGTAGCTGAACTG
Ptprq	GGAAACCAGAGCGAAAACAT
Ptprq	GCTGGATCAGCTCATCACGG
Ptprr	GAAACTCAAAGAGAAAAATG
Ptprr	GAAGGGAGAAGGGCAGACAG
Ptprr	CGTACCTGTCTACACGAAGC
Ptprr	TGACCGTGTGAGAACTCGGC
Pus1	AGTACATCTCCAGAATGTAG
Pus1	AGGGGCATAACCCTTCACAA
Pus1	GATTGAAGAGGGTCACAGGC
Pus1	TGAGGAAGATGTCCTTCCAG
Pus7l	GATTCCGGGAAAAAGCACGC
Pus7l	TGTCTGAGGGAAATGATGAA
Pus7l	AGTACCCGGAGAACCAAGTA
Pus7l	TGTTTCATCAACGATCACGT
Pwp1	TGTCAGCGGAAGCAGTCACA
Pwp1	GCTTACTGCACATACAGACA
Pwp1	GATCTTCACAAATTTGTCAG
Pwp1	CAGCACGGCCACAAACGATG
Pxmp2	GAACAGCAGCAGAAAAGTTG
Pxmp2	GAAAAGTTGGGGCAAAGAAC
Pxmp2	TTGATGTTAATGAACTGCAA
Pxmp2	GCTGCTCCTAAAGCTCTACC
Pxn	AAAGCATTCGGGGTGCCAGA
Pxn	GTAAGGTCGTGACCGCCATG
Pxn	GTCCGACCTGAACAAGCTAG
Pxn	AGTGTTCCGGGTGCCATGTG
R3hdm2	AGAGTTGTTGAGGCGAAGGG
R3hdm2	GGTGATATGAGGTCATCTGA
R3hdm2	AGAACACGGAATTTCAACAG
R3hdm2	TGAAGGAATCACCCGTACGG
Rab21	GAACACTTACCCATATGGCA
Rab21	ACTTCCGCTAAACAGAACAA
Rab21	AGCGGAAGTATGGTAATGCT
Rab21	GCTGCTCGGGGAAGGCTGCG
Rab35	GTATTATCGGGGGACCCATG
Rab35	TGGCCCTACAGGTATTATCG
Rab35	GGCCCTACAGGTATTATCGG
Rab35	GCAGCAACAACAGAACGATG
Rab3ip	TGCCTGGGGGACGAATACAC
Rab3ip	GCAGAGAGGGAGTTTCTGCA
Rab3ip	GAAGCCTTCACGAAGCGGAT
Rab3ip	TGCACAGTTGAAATGCCTGG
Rab5b	TACCAGGAAAGCACCATTGG
Rab5b	GGCACCCCTGTAGTACATAG
Rab5b	GTTTGCTCGGGCAAAGACAT
Rab5b	TGCAGTGGGGAAGTCTAGCC
Racgap1	GTACTGGAATCAGTTCATGA
Racgap1	GAAGTGTCGAGACTGTCGTT
Racgap1	TGGACGTGGAGATCAAGCGG
Racgap1	AGAGCGGAGTCACTGTTCAC
Rad9b	GAATTACCTTGAAAGAAGTG
Rad9b	GTTCCCTGGAGTAACAGAGA
Rad9b	AAACAGGACGTAGCCATACG
Rad9b	TGTGAACAGCAAGAGTATGC
Ran	CGTCAAGTGGCGCTTCACGA
Ran	CGCGATGGCTACTACATCCA
Ran	GGATGTAGTAGCCATCGCGC
Ran	CTGTTCCCCGCAGCCACCCT
Rap1b	GAACGGACAAGGCTTCGCTC
Rap1b	AGGCGTTGGGAAGTCAGCCC
Rap1b	GACGAGCTTATATTCACGCA
Rap1b	TCTAAGAGAGCAGATTCTGC
Rapgef3	AGGGCAGAGACAGAGCTCTG
Rapgef3	AGAGCTGCTGCATATCAAGG
Rapgef3	GAAGAGGTTCCAGTCATGGT
Rapgef3	GTGGTGTGGCCACATCCCTG
Rarg	AGATGGATGACACCGAGACT
Rarg	GCCCGGCAAAGGCAAAGACG
Rarg	GAAGTGGGCATGTCCAAGGA
Rarg	ATGAAAATCACCGACCTCCG
Rasal1	GTCGATGGAACAGTTCATGA
Rasal1	AGGCCAAGCGCAAGGCAAGT
Rasal1	GCTCACGATGGCGTCCACAA
Rasal1	GCGCCCTGTAGAGCTCACGA
Rassf3	TGGGCCCTGCTACCAAACGT
Rassf3	GCTCTCGAAGAACAAAACTA
Rassf3	CAGCAGTACAAACACCGTGG
Rassf3	GCTACCAAACGTAGGTACAG
Rassf9	AGCCTGGATAACATCGATGG
Rassf9	CAGGACGAGAAGATTGTCTG
Rassf9	GAAACTGGCCAAAATTAGGC
Rassf9	GGACCGAGTAGGGAATGATG
Rbm19	GAATAGTGAGAAATGCTCAC
Rbm19	TGCAGGTGGACGCTATATCG
Rbm19	CGGCTCTAGGAACTCTACGA
Rbm19	GGGTCGTGTCAATAAAGCTC
Rbms2	GTAGAGATGACCTGGCCAAA
Rbms2	TGGCAAGATTGTCTCCACTA
Rbms2	GATCCTTCGAGACACTAGTG
Rbms2	CAGTCCTCGGATATACAGGT
Rdh16	AGACACTCGACCCATGACAC
Rdh16	ATGGGTCGAGTGTCTCTCTT
Rdh16	GGTGCAACAAGGACCTGTCT
Rdh16	AGGTGCAACAAGGACCTGTC
Rdh5	GGTCAAGTTGCAGTGCCAGA
Rdh5	CGGAGTACAAGTCTCCATTG
Rdh5	GAAGGCCTCCAGGCCAAACT
Rdh5	TGATATCCAGTAGTGTTGTG
Rfc5	GAGGGATCGATATTGTTCGG
Rfc5	GTTCACTTGTTTGTACACAG
Rfc5	TGGCAATGTCCGTCTTGAGT
Rfc5	AGGAAAGACATCCACCATCC
Rfx4	GTACCATTACTATGGCATAG
Rfx4	GCAGACTCTGTATACCATGG
Rfx4	GGAACGTGATGTCTGCACTG
Rfx4	GCTAAGGCCAGTGTATTCGG
Rhebl1	GCCGCTGGTGCGCTACAGGA
Rhebl1	CTGTACCAAAAGCTACACGA
Rhebl1	GCCCTACTCGCTCATCATCG
Rhebl1	ACGAAGGCCACGGTAAAACC
Rhof	TGTGACAGTGGGTAACAAGG
Rhof	GTACTTCTCAAACACCGACG
Rhof	TCGGCTGCAAGACAGACCTG
Rhof	GAGCTGAAGATAGTGATCGT
Ric8b	TGTGACGGTAGACAGTTGGA
Ric8b	GACCTACAATTAGTAAACAA
Ric8b	GATAGCCTGCTGAAATACAC
Ric8b	AGAGAATGCGGAGTACTTCC
Rilpl1	GATATCGTACACATCCATGA
Rilpl1	CGTGGGCCACGAGTTCGAGA
Rilpl1	CTGGTGGAGGACGTGTGGCG
Rilpl1	AGCTGGTGGAGGACGTGTGG
Rilpl2	GATGTCGTACACGTCGTCGG
Rilpl2	GGAGATGTCGTACACGTCGT
Rilpl2	GTTCAAGATAGTACGTGTGA
Rilpl2	ACTGCAGCCGGGTGACGCGG
Rimbp2	GAACACCCTGGACTGCATGC
Rimbp2	GAAAAGTTCCGGCAACACAC
Rimbp2	TGTACCCACACGAAGAATGG
Rimbp2	GGGGAAGGTGCACCTGTGTG
Rita1	TGGGTGAATGGCTCGCAGAG
Rita1	GCTGGGTGAATGGCTCGCAG
Rita1	AAACAGGGTCTCATCCACAT
Rita1	CATGCCTTGGAAGTGACCAG
Rnd1	AGCGAAAGACTGCTATCCCG
Rnd1	GGAGACAGAGGAACAGAGAG
Rnd1	GGCGCAGAAATCTACCTGGA
Rnd1	AGAGAGTGGAGCTTAGTCTC
Rnf10	CACTGAGTGAAAGATAGTGC
Rnf10	TGGCCGCAGTAGGTGGATAG
Rnf10	GCAGATGGGACATTTGCTCC
Rnf10	GTAGGTGGATAGAGGCATAT
Rnf34	GACAAGTAGAACATCTGCGG
Rnf34	GGGCTGCTGAATGAAGTCAT
Rnf34	GGTGACAAGTAGAACATCTG
Rnf34	GACTGAAAACGAAAGCCCAC
Rnf41	AGTCTTGGAGGAGCCAGTGC
Rnf41	GAAGGTTGGGGTTGACACTG
Rnf41	CGGGCAGCCACTTTCCACGA
Rnf41	CTGCTGCTGAGAGAACCATT
Rnft2	GATGTACTTCAGTACAAAGT
Rnft2	GAAGGTATAAAGGACGTACA
Rnft2	GGGTATCCACAGCAACCGAG
Rnft2	GTGGTACAAGTACATCATGG
Rpap3	GCTGAGAAGGTTTGACATGG
Rpap3	GCTGCCAACAAACAGAGCGT
Rpap3	GGAACCTGGAAATAAGCAAG
Rpap3	GATGCTGTATCAGTATGTAA
Rph3a	GCAGCAGGGCGGCCTCATTG
Rph3a	CAGCAGATGAAGCTTCACAT
Rph3a	TGATATCAAACACAGCGACC
Rph3a	AGAGGAACGGGGCAAGATCC
Rpl41	GGCGGAAGAAGAGAATGCGC
Rpl41	CTCCTGCGCCATGAGAGCGA
Rpl41	AGCGCAAGAGAAGAAAGATG
Rpl41	GCCGCTCACCTTCGCTCTCA
Rpl6	TTGCAGCCGAAACCCTGTCC
Rpl6	GGACAAGAACGGTGGCACCC
Rpl6	GTTGGTGGGGACAAGAACGG
Rpl6	CGCAAGCCCAGGCATCAGGA
Rplp0	GTGGCACCGAGGCAACAGTT
Rplp0	ATGATGCGCAAGGCTATCAG
Rplp0	AGATCCGCATGTCGCTCCGA
Rplp0	TGAGATTCGGGATATGCTGT
Rps26	TGTTAGGAATCGATCCCGCG
Rps26	CTTACAGCAGGTCTGAATCG
Rps26	GATTCCTAACAACCTTGCTA
Rps26	GGTCGCGCCAAAAAGGGCCG
Rsrc2	GAGCCGGAGCAGAAGCAAAG
Rsrc2	AGAAAAAGAGGAAAATGCTC
Rsrc2	AAAGAAAGGAAGTCATCACG
Rsrc2	TGAGCTGCCATAGCTATCTG
Sarnp	AGGTGGTAAAGATTACATCT
Sarnp	TGTACTGGGAGATGAAACTG
Sarnp	GCTCGTGGTTTAGAGACCAA
Sarnp	TAGGGCATCGGAAAAGAAGG
Sart3	GCAGCCTGATGAGCTCCACG
Sart3	GATGCTGTCCCAGAGCTCTC
Sart3	GAAAGGCCTGGCCATCTGGG
Sart3	GCCCATGGACAGTTGCCCTG
Sbno1	TGAGTAGAAAAAGAGCATTG
Sbno1	GGAGAGGGGAATGTCCTGGG
Sbno1	GCTTGAGGCAGTTACCTATG
Sbno1	GAAGATGGGCAGCGGATTGT
Scaf11	GCATGAGAGGAACTCCTGTG
Scaf11	GCTGCCACATGAAAACACAC
Scaf11	TGCCTGTTAGGGAAGGAAGT
[truncated: 597 more rows]

## Sheet: Chr14q gRNAs
Mouse Homolog	gRNA Sequences
0610007P14Rik	GCTTCTCGTAGAGAAAAGTG				Total gRNAs	2284
0610007P14Rik	GAGCAGCGTCCAGATCCCAA
0610007P14Rik	CTCTACGAGAAGCTCTACAC
0610007P14Rik	GGTCGGGCTCCGGTACCTAG
1110008L16Rik	TGGAGGCACAGCCATTTGGT
1110008L16Rik	TATCCTCAGCTATGACACAG
1110008L16Rik	GACACAGTGGTACAAAGGAC
1110008L16Rik	GTGGTCCCGCAACAGGTCTT
1700011H14Rik	GATTCAATGCAAAGAACACA
1700011H14Rik	GATGAACCATAAAAGACAAG
1700011H14Rik	GGTGTGACTTTGATCACCCG
1700011H14Rik	AGGCTTCTGTGCCATCAAGA
1700123O20Rik	TGACACTCAAAGATACATGG
1700123O20Rik	GAAGTGATGTAAGACATTGG
1700123O20Rik	GAAGCAGGGTGGCACCGATG
1700123O20Rik	AGATGAAGTGTATTCTTTAC
2010107E04Rik	GTTTACCAGGAAATTTGGGT
2010107E04Rik	CATGAAACCCTACTATACCC
2010107E04Rik	GGGTATAGTAGGGTTTCATG
2010107E04Rik	TGGTAAACCTGGGTATAGTA
2410016O06Rik	GCTTGGTGAATGAAGCCCCG
2410016O06Rik	AGCCCCGAGGAAAATAGAGC
2410016O06Rik	AGACTTCATGGATTACATGG
2410016O06Rik	GCTGGTAGGTGGACAAGGTG
2700049A03Rik	AGGAACTGAAACTAACCTGT
2700049A03Rik	GTAGCGACAGGAGTGCGTGT
2700049A03Rik	AGGGTGATAGAGCTAGTGAA
2700049A03Rik	GGAGAACTGAATCTGAGATA
2700060E02Rik	GCTTTAGAGAAACATATTCT
2700060E02Rik	ATCGGCAAGAAGCGATTGAC
2700060E02Rik	TCACCATCCAAGTTGATCAG
2700060E02Rik	AGACTTGAATATGGAGATAA
3632451O06Rik	TGAGAACAAAGCCACCACAT
3632451O06Rik	GCAGTCACAGACGTAACACA
3632451O06Rik	AAGTTGTTCTAGGCCATAGG
3632451O06Rik	GATGGAAAAGCTAAAAGACA
4921506M07Rik	GCAGGTTGGCACCACCCGAC
4921506M07Rik	GTTGCGCGAGAAGGGCCGGG
4921506M07Rik	AGAGGATTCATGCAAATCAG
4921506M07Rik	GCCGCAGGAGGATCACCGGT
4930427A07Rik	GCTCAGTGTCCTGATCACCT
4930427A07Rik	TCGGGCGAGGAGCCAAGACA
4930427A07Rik	AGAATGGAGCAACTCAAGGA
4930427A07Rik	TGTGGAACCAAAGAGCCCCG
4930430A15Rik	TATTTGGGTGGACTGCATTA
4930430A15Rik	TGTCCCAAGGAAAAACCTGT
4930430A15Rik	ATGACAGAGACTTTAAGGAA
4930430A15Rik	GCCTGGTGGATCTTTCTGAG
4930447C04Rik	GTTTAATGAACATTACTCTG
4930447C04Rik	AGAATCAAAATGTAGTACAC
4930447C04Rik	AGAAATTAAAAATAGAGTGT
4930447C04Rik	CGGATTGAAAAAGAACATAT
4931414P19Rik	GCTTAGAGTTAGCATCCAGG
4931414P19Rik	GGTAAGGAAGTAGGCCACAC
4931414P19Rik	GAAGAGCCTGGAGTGCTCAA
4931414P19Rik	GAAGTGGGTGAGCTACGGCA
9030617O03Rik	AGTGGTGACGAGTACGGAGC
9030617O03Rik	AAGTCCATGAGCGCTACCTG
9030617O03Rik	GTAGAGAACCAAGTCCGCAG
9030617O03Rik	CGATGCCTGAGACACCACTG
A530016L24Rik	AAGCAAGGACCACACACCAC
A530016L24Rik	AGAAAACTTCAAGGCATGTG
A530016L24Rik	AGAGAATGAGGGGACCACGC
A530016L24Rik	GGTGTGTGGTCCTTGCTTGT
AK010878	GCAGAAGATGAAAATAACTC
AK010878	TCTGGTAGAACTAACTCAGA
AK010878	TAACACTATTGTTAAGATGC
AK010878	TATTGTTAAGATGCTGGCTT
Abcd4	GTTGAGGGTGTAGTACACGC
Abcd4	AGCACATGAGGACAGACCGC
Abcd4	GTTGAGGACAATAAGTGTCA
Abcd4	ATGTTGCCGGTTACACACAC
Abhd12b	GTATTGTCTGTGGACTATAG
Abhd12b	AGCTCCATTTACCAACATAT
Abhd12b	ATGCAAGATGAGAAGCGGGG
Abhd12b	TGGAAGAATTAAGCTGACAC
Abhd4	GGCCTCAATAGAGACATGGC
Abhd4	GATCAAAGGTATGAAGTGTG
Abhd4	AGTGGATTCGCTCCAACATG
Abhd4	TGGGATTCTGTGCATTGCAG
Acin1	AGAGGGAGCCAATAGATGCA
Acin1	GCTCAGCATAGTCAGCACAA
Acin1	GACGATGGGACCCATGACAA
Acin1	GGGGCGTACAGGAACTTTGG
Acot1	TTTCTCAGGATAGTCACAGG
Acot1	GATTTCTCAGGATAGTCACA
Acot1	ATTTCTCAGGATAGTCACAG
Acot1	TGTGACTATCCTGAGAAATC
Acot2	TGGAGCCCGAACGGCCTCTC
Acot2	TCTCAGGACAGCGAAAGACG
Acot2	AGGATTGGAAGAGCTGGGCG
Acot2	AGGCGCCAGAGAGGCCGTTC
Acot4	AGAGCCATTGATGGAAACTG
Acot4	GGAATACCGAGCCGGCCTTG
Acot4	GCCATGGCCAGCCACAAGGC
Acot4	GGGCACATGGGAAAGTAAGG
Acot6	ATGGGAGGAGGAAAATAAGG
Acot6	ATGGGCTTGCAGGCGTTCAC
Acot6	GATTTGTATGGAAGTATCGG
Acot6	GGATATGTGGAACAATCCAC
Actn1	GGATTTCATAGCCAGCAAAG
Actn1	TGTCTCTCTACAGACATCGT
Actn1	TGACCAGTGGGACAATCTAG
Actn1	GCACCCGATTCTCCAGCCAT
Actr10	GTATTTCTGCAAGCAATCTG
Actr10	AGACGGGCCGCATACCTGAC
Actr10	TTGTTGAGAGAGCACCAGTC
Actr10	GCAGAGAATTTGGTAATCAT
Acyp1	TGGGTTCAGAACACCGACCG
Acyp1	TAGGCTGAGGGTAAAAAGCT
Acyp1	CCGACCGGGGCACCGTGCAA
Acyp1	TGAGGGTAAAAAGCTAGGTT
Adam20	AGAATTTGCATTCTATCCAC
Adam20	CAGACAGACAGTACCAACAT
Adam20	TCTGATGCAAAACCACTATG
Adam20	GCCATCATTAAGGGCACACC
Adam21	AGTAGGCACCGGCACCACAG
Adam21	GTACAGTTAAGAAAACAACA
Adam21	CGTGTTGGCAAAAAGAGACC
Adam21	TGAGCTTCTAATGAAGATAT
Adck1	GTTGCATGATGGTCGGACAG
Adck1	GTTACTGTAGAGGTAGACAC
Adck1	GGACCGGGCTGTCAGCATAC
Adck1	TCAGCATACAGGCAAACAGT
Adcy4	ACGCATGTTGATATCCACAC
Adcy4	GTTCCTGTGTGGGAACGTGG
Adcy4	GCTAGGAGAACCTACATACC
Adcy4	GAGGTCCCTCACCCACACGC
Adssl1	AGTTGGAAGAAGTCACAAAG
Adssl1	GAACCGTGGCCATGAGTGGG
Adssl1	AGAACCGTGGCCATGAGTGG
Adssl1	AGAGAAGGTCACAGATGCGG
Ahsa1	GCTGCCTTGGAAGCCGACAG
Ahsa1	AGTGCAGTACAAAGGACATG
Ahsa1	AAGTCAGGAGTGCAGTACAA
Ahsa1	TGAGCCTGACACAAATCTCG
Ajuba	GGAGCAGCAGACAAAGCACT
Ajuba	AGAGCAAATGTCCATCAAGA
Ajuba	AGTGCAACAAAGGTATCTAT
Ajuba	AGGGCTGTGAGGACATTGTG
Ak7	GTTGTCGACAGTGATGACAT
Ak7	GAAAGCATGGAGCAGAACGC
Ak7	GAATCTCCCGGAGAGTGTCG
Ak7	GGAGAAGATAGCCCGCTGGG
Akap5	GGTGCCTGGGCCTCCATCAA
Akap5	TAGGCAAGGAAACTTAAGTC
Akap5	CAGCAGAAGTCACTGACCGA
Akap5	AATGGAAAACGAGCAAGTGG
Akap6	GCTGTACCTGGAGACACACT
Akap6	GTGCAGGACAATCTTCCAGT
Akap6	GCTCCGGATGACCTCAGAGA
Akap6	GAGGAGTGGCCTCCATTCTG
Akt1	GACAAAGCAGAGGCGGTCGT
Akt1	GGGAATATATTAAAACCTGG
Akt1	ATCTGCCACAGTCTGAATGG
Akt1	TTCTTGAGGAGGAAGTAGCG
Aldh6a1	GAGCCGGTGAAGGAAAACAT
Aldh6a1	GCTGAAGGAGATGTATTCCG
Aldh6a1	GCCATGGGAAACATCCAAAG
Aldh6a1	ATGCCTGCACACACCCCCAG
Alkbh1	GTTTACTAGAGAGACTGCGT
Alkbh1	GTCCACGTGGATTCCCAGTG
Alkbh1	GGACCGCATGATTTAACAGG
Alkbh1	CTATCGCCTAGACTCCACAC
Amn	GGGATTGCGGAAGAGCAACG
Amn	GTATCGTGTCGGCGACCCTG
Amn	GGGGACCCAAAGTTTGTAGG
Amn	GTTGGAGGCAGTATCGAAGG
Ang	GACAGGCAAACCATTCTCAC
Ang	GCAGAGGCTCGGTACTGGCA
Ang	AACATGTCTGAACCCTGCAG
Ang	GCCAGTACCGAGCCTCTGCA
Angel1	ACGCGGGTTGTACAGGACAT
Angel1	AGTGGGTATACACTGAGGTC
Angel1	AGTGCTGGAATTCCTGCATG
Angel1	GATGGAGAGCTCCAGTACAA
Ankrd9	GCAGCAGAAAGAGGCACTCG
Ankrd9	ACCGCGGGAAGGTAGCTAGC
Ankrd9	CGCGCCCCCGCTCATCACAG
Ankrd9	AGTGGTGACCAACACCTGCA
Ap1g2	GGTGACTACAGGATACTCCA
Ap1g2	ACAACGTCACCGGTCCACTG
Ap1g2	AGTGACTAAGAGCAAAGCAG
Ap1g2	AATCAGCCCGAAGATCAGGG
Ap4s1	CTTGTCAAGAATCAGCAGAG
Ap4s1	GCAGGCACTCACTTGTTCGC
Ap4s1	AGCTTGTCAAGAATCAGCAG
Ap4s1	CAAAGAGAGCTGCATATTGC
Ap5m1	GAATCCAGAGAAGTCACACA
Ap5m1	AGAATCCAGAGAAGTCACAC
Ap5m1	GTTCCTGTCCCACCAATACT
Ap5m1	GGTAAGAACCCAGTATTGGT
Apex1	GGTAAAGGGTGATGGGACAG
Apex1	CGGAGCTGACCAGTACTGAT
Apex1	TGTAAGCGTAAGCAGTGTTG
Apex1	GGGAAAGCAAAAAGTAATCA
Apopt1	TGTGAAAATGAACGGGACGA
Apopt1	GAAGGTTTGAGCATTTGTCT
Apopt1	AAGCTAAGGGCGCAGGCTTG
Apopt1	GGAGATGGCCGACTTCTATA
Arel1	GTTGAGGATAAAGCACACCT
Arel1	GAAGTTGGGTGGCTTAAATG
Arel1	GCACTCGGAAGGCCATGCTG
Arel1	GGAAGGTGTAGAGGCGCCAG
Arf6	GAAATGCGGATCCTCATGCT
Arf6	TACCACGAAGATCAGACCCT
Arf6	GCCCTCCTGTGCCACCTCCG
Arf6	GCACCGCATTATCAATGACC
Arg2	GTACATTGGCCTGAGAGATG
Arg2	CAGGAGGCTCCACATCTCTC
Arg2	AGAGAGGCAAGGTTTGATCC
Arg2	TGATGGAACAGACATTTGAT
Arhgap5	AAATCAGGTCTCATCAAAGT
Arhgap5	GAATATGGAATCAAAGGATC
Arhgap5	GAAAAGATGAACTGGTTCAT
Arhgap5	ATGGAATCAAAGGATCCGGC
Arhgef40	GGGGCTGACAGAAAACATCG
Arhgef40	GGAGGGGGCGGACAGAAGGC
Arhgef40	GGTGGAGAGGACGTACCAGG
Arhgef40	GCTTCACGAACTGTGCATAG
Arid4a	AGACTGGTCTATCATCAGGG
Arid4a	ACGGTGATGAGAGAACTCTG
Arid4a	GATGTCAGTGCCAAGTACCG
Arid4a	TGTCAGTGCCAAGTACCGAG
Asb2	AGGTGCAGACATCAACACGC
Asb2	CTGGGCAGCCACAAACAAAG
Asb2	GCAGCCCAGCTGGCCATAGT
Asb2	GGCCATAGTAGGCAGCCTCG
Aspg	AGTAGCATGGAGCCTGACGT
Aspg	TGGCCAATACGTCATCCCTG
Aspg	AGACACTACGCACAGTACCA
Aspg	AGGTACCTATCCACGCACTG
Atg14	CGGCGAGTGGTGTTGCACAG
Atg14	TGTGCAACACCACTCGCCGG
Atg14	GAAGGGATGTCACAGAATCG
Atg14	GATTAGCCTACCAAACAACG
Atg2b	GAATAGGGAAGCGAACAGAC
Atg2b	ATGAAGCTTGACCAGTACAT
Atg2b	GAAGCGAACAGACAGGTGCA
Atg2b	GAACAGTGTAACTCAAAGCG
Atl1	GCTACAGGGAAGCACAAATG
Atl1	TGTGCTAAGCGCAAATACTG
Atl1	AAAGATGACAACGAACAGTG
Atl1	GGATCGGAACGAGAAACCAC
Atp5s	CTGACAGGGCAGCATCTGAG
Atp5s	GGAGCCAAAGTACGCTACTG
Atp5s	AACTGGAAATAATTGCCTGT
Atp5s	GTCCATGATACAAGAATCGG
Atp6v1d	GTAATGTTCAAACACTGGCA
Atp6v1d	TAGGGCACAGACCATCATGA
Atp6v1d	GCAAGGGTGCGTTCAATCCG
Atp6v1d	GAACTGACCGGTTTAGCCAG
Atxn3	TATGCAATTATAAAGAACAC
Atxn3	CAATTGAGGATAGCTCCACA
Atxn3	AGTTAGAAAATTAGGCAAGC
Atxn3	TGCCTGAATAACCTATTGCA
BC022687	GGGACTGAAGGGGTTCTCAG
BC022687	GCTCACCTTGGTCTGAATCA
BC022687	TCTGCTTCGAGGTGTCTCTG
BC022687	GATCTGCTGCGACGGTCCCG
Bag5	AATCAGTCCTGACAGCACGC
Bag5	AGAGATCAGAAATTATCGGA
Bag5	GTTCCCAAGGATCTCCCACA
Bag5	AGGGCCAAGACAGAGCTGCA
Batf	CTGGCCAGCACGGAGCACAG
Batf	GAAAGCCGACACCCTTCACC
Batf	AGAGATCAAACAGCTCACCG
Batf	GTGGGTACTCACCAGGTGAA
Baz1a	TGTGTGACGGCTGCGACCGA
Baz1a	GCTCAGCCGAAGCTCCATGC
Baz1a	GCATGGCCACAGTTACACCA
Baz1a	GAAATCCCTAGTAGAAACTA
Bcl11b	GCACGGGCAGATCGGCAAGG
Bcl11b	GCACTTGTAAGGCCGCTCGC
Bcl11b	GTAGCAACCTGACGGTGCAC
Bcl11b	CAAGAACTGTAGCAACCTGA
Bcl2l2	AGACAAAGAATGCCACAAGA
Bcl2l2	GCCCCCTTGGAAAAGTTCGT
Bcl2l2	AGCCCAGCAACGCTTCACCC
Bcl2l2	GGGACAAGTGCAGGATTGGA
Bdkrb1	GGAACGCAGAAGGAACGTGG
Bdkrb1	GAAGGCAAAGAAGTGGTAAG
Bdkrb1	GTGGGGGAAAAGCAGGATGC
Bdkrb1	AGCTACCCAGATGAGCAGGC
Bdkrb2	GACGGCCAGCACTAGCACGG
Bdkrb2	ACTGTGGCCGAGATCTACCT
Bdkrb2	GGACGGGTAGACGATGACGC
Bdkrb2	GTTGGTGTTCAGGACCATGA
Begain	AGGTGACGGAGAAACTGCGC
Begain	ACTACCTGGAGATTGAGCTG
Begain	GTAGGCCGGATGGCACAGTG
Begain	TAGGAAGGACTGCAATCTAG
Bmp4	GTTGACTAGGGTCTGCACAA
Bmp4	GTGGAGGTGAGTCACCTCAA
Bmp4	GGGCTGGAATGATTGGATTG
Bmp4	ATGGCCAAAAGTGACCAGGA
Brf1	CAGTTCGGCAAACCAAGTAG
Brf1	GTAAGCAAGCATCTTACCCG
Brf1	AGAAATTGAATGCTGTGTCC
Brf1	GTTCTCCACGAACTGCACCT
Brms1l	GATGGTGAATGGTATATACG
Brms1l	GAAAAGATGAGTGTCCCACA
Brms1l	AAACATGCAGATTCGCACAA
Brms1l	AGATTGTGAAAGGAGAAGGA
Btbd6	TGGGCAAGAAGGAATGACAG
Btbd6	TGAACTGACCCAGAGATGCT
Btbd6	AGTAACCAGTGGAGGTACCG
Btbd6	TGGAATTCGGACCAGGTAGA
Btbd7	GTAGAGCCAAACTTACTGAG
Btbd7	GAAACAGTGAATGATTACAG
Btbd7	GATGCCAGATATCGCCATGG
Btbd7	TGTAACAAGGCGGAAAACAT
Calm1	TGGGAATGGTTACATCAGTG
Calm1	AGGAACTGGGGACCGTCATG
Calm1	TGACGGCACCATCACAACCA
Calm1	GCAGGATATGATCAACGAAG
Catsperb	GTCATGGTAACTAAATACGG
Catsperb	ACTATATTAGAGGAAATCTG
Catsperb	TGGAATAGAAATTCCCATGT
Catsperb	CAGAAACAGGACCCTCAGTG
Cbln3	CGTCGGGGGAATCTTCTGGG
Cbln3	GTACAACCGCCAAACTGTCC
Cbln3	ACTGGAGGGGGAGTGCCTGG
Cbln3	GACGCAGGCGCAGGGACACA
Ccdc175	AGAAATGCGGAAAAACACGG
Ccdc175	AGAGCATGAATGAAGTTCTG
Ccdc175	CGAGAAAAAGACACGCACAT
Ccdc175	AGAAAAAGGTAGAAGATATG
Ccdc177	TGGCCTGCAGCAGCTCGCGG
Ccdc177	TGGCGCGGGCGGGAGAACGA
Ccdc177	GGGGGCTGGTCAGGACGTAG
Ccdc177	GCTGGGCCTCTCGCACCATG
Ccdc85c	GAACTGTAGACGGTGGACGG
Ccdc85c	GCAAGGAGGAGCTGGCGCGG
Ccdc85c	TGATGCGCGACGTGAACCGG
Ccdc85c	GCAACTTCAAGACAGCTGTG
Ccdc88c	CGAGCGTGACGAGTGTACCG
Ccdc88c	GAAGCAGAGCATGAAAGAGT
Ccdc88c	GCTCAAGGGGAACTTAGAGG
Ccdc88c	TGAGGACTGGCACTCGTACA
Ccnb1ip1	GAAAGGGTACTGTTGCAAGC
Ccnb1ip1	AAGTGTCGGATCAAGCTCTC
Ccnb1ip1	TTGCAAGCAGGACAGATCGC
Ccnb1ip1	ATCGCAGAAGATGTGAGAAC
Ccnk	TGGACCACACAAAACCATGT
Ccnk	TGAAGCGAGCCCCCTCTCGG
Ccnk	TTGATGTGGGCACACGTTTG
Ccnk	AGGAATGGAACATATAAAAT
Cdc42bpb	GACATGGCGAGGTTCTACAT
Cdc42bpb	AGTGCAGAGCCGTGATCCAC
Cdc42bpb	GGTCCACGTACAGTCCCATG
Cdc42bpb	GATGGTCTGAACCCACTCCA
Cdca4	ACAGAGCTGGAGCTTGACAA
Cdca4	AGGACCGAGCGGCAGAGATT
Cdca4	AGGACAGGATGTTTGCTAGA
Cdca4	GATCCTGTGTCGTACAGTGA
Cdh24	GACCCAAGAGGAGTTCTTGG
Cdh24	AGGTCTATACCAGTTCTCAG
Cdh24	TGGACCGCGAGGCTCGTGTC
Cdh24	GGCTGGGTCGATGAGTGTGT
Cdkl1	GGGTGAGCGGTACCACCGGG
Cdkl1	GCACTTGAACACTACCCCAT
Cdkl1	GTTCGAGTACTGCGACCACA
Cdkl1	GAGGAAGCGGAGGCTTCACC
Cdkn3	GGGAAGAACGTACTGTATCA
Cdkn3	TGGGGCGATACAGACCATCA
Cdkn3	GGACTTGGAAGATCCTGTCT
Cdkn3	GAACAATTCACTCGCGACAG
Cebpe	GATGTAGGCGGAGAGGTCGA
Cebpe	AGAGCCGGGACAAGGCCAAG
Cebpe	AGGGATAGGCGAATGGCCGA
Cebpe	CAGGTAGTGAGGAAACGAGG
Cep128	AGGAATTGGAGATCTCACGC
Cep128	GAGGTGAGGTAGGTGCAAAG
Cep128	GAATACAGCACTGGACAGGC
Cep128	GATGACCGGAGGTTTAGAAG
Cep170b	GCTGGTACAGCGTATACCAG
Cep170b	AGTCTCCTTCAAGATCAGGT
Cep170b	TGAATGTGAGCTCATGTTGC
Cep170b	GCTAAGCCAGACACTAGTGA
Cfl2	GACGCTGGGAGAGAAACTGG
Cfl2	TGGCATCGTACAAAGCATAT
Cfl2	GCATATCGGCAATCATTCAG
Cfl2	TGACATTGGTGACACTGTAG
Cgrrf1	GAGCGTTACCAGGAACACTG
Cgrrf1	GCCGGTGGTGACGATGAAGC
Cgrrf1	CTTGAGGACAGACTGCCTGG
Cgrrf1	TCACCATCCTAATACCAGGC
Chd8	GTTGATAGGCTGTTACTAGG
Chd8	GCCCTATGAGGACAGTACGT
Chd8	GATGCTGAGGAGACTCAAAG
Chd8	GACACATGGCCACAAAACCA
Chga	GCTGGGTTTGGACAGCGAGT
Chga	GGAGGGTCTCCAGACACTCA
Chga	CAGCAGAAGCGCCAGAACCG
Chga	CATGACAAAAGGGGACACCA
Chmp4b	AAGCAGCTGGCACAAATTGA
Chmp4b	GTTCTTGAGCACCTCCGTGT
Chmp4b	TGACCAGCAAGAACTTGCAG
Chmp4b	GTTGGTGTTGGCGTTCTCTA
Churc1	GGAGAAGGAGTACCCCAATC
Churc1	GCTGAATGTATACTCGTGTC
Churc1	GCCACACAACAGACACAGCA
Churc1	CGATCCATTCTCCAGACAGG
Cideb	GGAGGACGACACGTGCTTGA
Cideb	GCTACGTGGAGTGCTAACAC
Cideb	GCAGCAGCGAGGAAGTCCAA
Cideb	TGGTGGAGGGGGCTGATCGA
Cinp	GGCCACGTGTGAAATAGAGG
Cinp	CTGCAGATGAGGTCTCCCGC
Cinp	AGTCAGTGCGAGGAAACTTA
Cinp	GCTGGTGCAGCCACATGGAC
Cipc	GGATGAAGGACAAAGAGCTG
Cipc	GGTCGTCATGAAGAGCGTGC
Cipc	GTTCTGACGAATCAACTCCT
Cipc	GCTCTTCATGACGACCATAG
Ckb	CGCGCTCAAGAGCATGACTG
Ckb	GAGCTCGGCGTACAGCTCCG
Ckb	GCATGGAGATGACTCGCAGG
Ckb	GCAGAAGGGGGGCAACATGA
Clec14a	AGGAGGGCTGAAGTCCAGCG
Clec14a	GTACTTGCATAGGTAGCCAT
Clec14a	GAGGCCAGAACGCAGGACAG
Clec14a	GGTGAGTGCGATGTGTCCTG
Clmn	AGAAGAGGACTTTCACACGA
Clmn	GCAGTCCATTGTGACATACG
Clmn	AGCGGACGGCAACCCCTCGC
Clmn	GATGCAGCGGAAATAGCGGA
Cma1	GAAGTTGGCAGAGAGTGGGA
Cma1	GTTCTAGGAGAGATCATTGG
Cma1	TTTCCAGATAGGCCATGTAG
Cma1	GTACATAGGATGCAATGCCT
Cmtm5	CGATGGCGCTGAGACACCGG
Cmtm5	GCTGATGCCCAGTACCACTG
Cmtm5	TGGCTCCCCAGGACTTCCTC
Cmtm5	AGGGCTCCAGGGCTTCGGAG
Cnih1	CCGGCTACTCACGTGCCAGA
Cnih1	CGCGGCCTTCTGCTATATGC
Cnih1	GGTAGTAAAAAAACGCTAGA
Cnih1	TAGAATGTCTGCATTCATGA
Coch	GGAACAGAAGGACCACACGT
Coch	GCTTGAACGAGACCCACGTG
Coch	TGGTCGAGAGAACTACTCCT
Coch	GGAAGGCTGTAGACACGCAC
Coq6	AGAGGGAAGAAATCTCTGCC
Coq6	GAAGTACGACCAGTCTGCTG
Coq6	GACCTTAGTGGGCTTCAGAA
Coq6	CGCGAGTGGATGGATTCTGT
Cox16	ACGCTATGGAGTTCCCATGT
Cox16	AGGAGTTGAGGATCTTCCCA
Cox16	AAGAACAAGACTCTACGCTA
Cox16	TAATTGTCACAGCATCGTAC
Cox8c	TCGAGAACAGGACTGCACGG
Cox8c	GCTTCGAGAACAGGACTGCA
Cox8c	GCGAAGAGCAGAGTAGCAGC
Cox8c	AGCAGTCTGAAGTATTTCAA
Cpne6	TGTGCCCACAGAGATCTCAG
Cpne6	GTTGATGATAGGGGCCACGT
Cpne6	GGATCTGAGGCAAGCAGCGG
Cpne6	GCTCTATGGTCCTACCAACG
Cpsf2	GAACAACGTCAGTTACAACG
Cpsf2	GTTCATGTACGACCTCTATC
Cpsf2	CGTGGACTTCAACCACAAGA
Cpsf2	AGAGTTTCCAAAGTGGACAC
Crip1	GCTGAGCGAGTGACTTCACT
Crip1	TGCGACAAGGAGGTGTATTT
Crip1	GAAGTGCCCCAAGTGCGACA
Crip1	TGTGGAAAGACACTGACCTC
Crip2	TGCAACAAGAGAGTGTACTT
Crip2	TGTGACAAGACCGTATACTT
Crip2	GATGGGGCCAGTGACCTGAG
Crip2	GCTCACAGCGCAGGCAGGGC
Ctsg	GATCAGAAGAAATGCCATGT
Ctsg	GCCAGGGGATTTGTGCACAG
Ctsg	GCCATGTAGGGGTAGGAATG
Ctsg	GCGGATTGTAATCAGGATGG
Cyp46a1	GAAGAGGGGCGAGGACATGC
Cyp46a1	GCTGCGAGCGCGATGCACGA
Cyp46a1	GTACAAGCAGAGGAAAGTCA
Cyp46a1	AGTAGGGGAGATGTCCAAGA
D430019H16Rik	AACACTGGGGAACATAGTGG
D430019H16Rik	TTGCCATCATAGCAACACTG
D430019H16Rik	AGCAACACTGGGGAACATAG
D430019H16Rik	GGCCATAAAAGACAGATCCA
Daam1	GAAAGTTGAGAATACATGAC
Daam1	AGCACTCACAAGGCATCTGG
Daam1	AGAGAACATTAAAACAAAGG
Daam1	TGACCTCACAGACAAACACA
Dact1	TGGTCAAGGCCGCCTCCAAG
Dact1	CCACAGCATGAAGTGGACTG
Dact1	TCTCCTACGAAGAAGCCCTG
Dact1	GCAGATAAGTGACCTGAGAC
Dad1	GACAAGGTGCAGGATCGTGC
Dad1	AGTTCATGACGACAAGGTGC
Dad1	TGTGGGCAGCTTCATCCTAG
Dad1	CTGACCGGGGCGCTGCAGTT
Dcaf11	GATGGACGAGAAGTACTAGG
Dcaf11	GTTCTCGGTCAAAGACATAT
Dcaf11	ATACAATGAGATCAAGACAC
Dcaf11	AGCTCCTTGATGACCTACAG
Dcaf4	TGGGCCAAGACTGCTACACA
Dcaf4	TGCCGAAGGATACAGTATGT
Dcaf4	GACAGGCCGTACCTTCCTGT
Dcaf4	CCAATGTGGTGACAGGACAC
Dcaf5	GCCAGAAGAGCAGATCATAT
Dcaf5	GATATCCGGGAGTCTCCCCA
Dcaf5	GGGACATTAGAAAGCCTCAG
Dcaf5	ATTTACCTGAGACCAGCCAC
Ddhd1	GTGGCGCCGAGATAAGACGG
Ddhd1	GCCTTGTGGAGAGCCGCTAT
Ddhd1	AGTGGCGCCGAGATAAGACG
Ddhd1	TAGTTATAGATTCTCCATAG
Ddx24	TAACTCCCAGAGCCGACCAG
Ddx24	GGGCAGTCCGACCACTTCGG
Ddx24	AGATTGAAAAAGCTGAATAC
Ddx24	GCAGTACCCAGGTCGTAGCC
Degs2	GTAGCGTAAGGTAGGCCAAT
Degs2	GATATTCCTACGAACTTCGA
Degs2	TTGAAGGTGATCCAATTGAG
Degs2	GGCCCGCAGCGACTTCGAGT
Dhrs1	GCGGCCGGTAATGTAAACTG
Dhrs1	GCCACGGCCAATACCCCTGG
Dhrs1	TGGCTTGAATCACACACCAC
Dhrs1	AAAGCTGTAAGGCAATGCCA
Dhrs2	TGTGGCCGGAGTCAACCCTC
Dhrs2	GCCGGAGTCAACCCTCTGGT
Dhrs2	CTTGCAGAGCCCCAACAGAG
Dhrs2	TGGTACATAAGCCACTCCGG
Dhrs4	GCGGCTGCTGACGACCACGT
Dhrs4	TGCCAGAGATGGAAAAGCGA
Dhrs4	AGACCAGGATATCAATCCCC
Dhrs4	GCAGAATGTGGACCGTGCAG
Dhrs7	GCCACTGGAAAGGGACACAG
Dhrs7	ATGGGAGCTGACTGACATGG
Dhrs7	GACCGATACAAGTTCCCATG
Dhrs7	AGTGAGCTCGGCCAATATCC
Dicer1	GTACGTGCAAAACAGATATG
Dicer1	GAATATGTGAGAATATGTAC
Dicer1	GACCAGGGTCCACAAAACGA
Dicer1	GCTGCCTGAAGATCCCACCG
Dio2	GGCGCATGCTGACCTCAGAA
Dio2	AGTCCACTCGCGGAGAGTGG
Dio2	CCTGTTTGTAGGCATCTAGG
Dio2	TGATCAGCAAGTCTACGCTG
Dio3	GAACAGCACGAGGCACGAGG
Dio3	GCATCCTCGACTACGCACAA
Dio3	GACGTAGAGGCGCTCAAAAT
Dio3	CGCACAAGGGACCCGCCCGT
Dlgap5	TAGCTCTTCAGACCACACGG
Dlgap5	GACAACTGCGAGTATAAACG
Dlgap5	GAATCCATCCAGATCTGTGC
Dlgap5	TGGTCTGAAGAGCTACCAGG
Dlk1	GGCGTCTGCACCGACATCGG
Dlk1	GCACTTGTTGAGAAAGACGA
Dlk1	GGGGACCCTCCCAGCCAACA
Dlk1	GTGTGCAGGAGCATTCGTAC
Dlst	GTCAGGGCTACATACATCAT
Dlst	TAGCCCTGACCTATGACCAC
Dlst	AATGCTGACGACTTTCAATG
Dlst	GATGGCGTGCATGCCCAGGA
Dnaaf2	GAACGTGTGCAGCAACTCAC
Dnaaf2	CGAGAACCGGAGGCGCTACG
Dnaaf2	GGGCCAGCGCCAGCGCTTCG
Dnaaf2	GCAGGTTCAGATCCATGCAG
Dnal1	GTTCGTCGGTAATCCCCTGG
Dnal1	AATAACCTGGTAAAAGACTG
Dnal1	GGAAGCAGTAGGAGAAACAC
Dnal1	GGGGATTACCGACGAACACC
Dpf3	TGGATGGAGAAGAGGCACCG
Dpf3	GCTTGGGGACCAGTTCTACA
Dpf3	ACTGCCGGAGCTACAACTCG
Dpf3	CCAGGTGAGTATGAGCGTAG
Dtd2	GAATTCTTCAAAACTCAATG
Dtd2	GAACAGGCAAGTGTTAAAGC
Dtd2	ATCCCGCAAGCCACCCTCGG
Dtd2	CGGTGGCGCACGGCACGTAC
Dync1h1	GAAGCGAGGTGGCAGAACGA
Dync1h1	GGTCCACAGGAAGTACACTG
Dync1h1	GTTTGTGGAAACAAACATGT
Dync1h1	TGTACAGGAGAGCTTCATGG
Eapp	GAACACTCTGTGCACATGAC
Eapp	TGAGAAAGATAACAGAGACC
Eapp	AGATAACAGAGACCAGGCCT
Eapp	GGATGACTATGACCCGTACG
Ear1	TGTCTGTAACATCACCAGTC
Ear1	TGAAATGATGCGTATTAACA
Ear1	GGTATAATTTGTTGCCCGAC
Ear1	TTGAAATGATGCGTATTAAC
Ear4	TCATTACAGCATCACATCGG
Ear4	CCCTCATTACAGCATCACAT
Ear4	GGATAGATGGGAGTGTCTTG
Ear4	AAGTTGTTGCAGGTGATATT
Eddm3b	TGGGTATGTCGACAGCATAG
Eddm3b	AAAGTTGAACATATATGCAT
Eddm3b	AGACTCCCATTAAGGTCCTC
Eddm3b	AGTTCCATTGCAATGCTGAT
Efcab11	GCTACCAGCGAGGACAGTGC
Efcab11	AACTCTAGAAGATTTCAAGA
Efcab11	GTTTGGGTACAAACCCTCCA
Efcab11	GACTCTATCGGAATGAGATA
Efs	TAGCAGGGACAATACCCTGC
Efs	GCCCCACGGCAAAAGAGTGG
Efs	AGTGTTGTCGTACAATGCCC
Efs	TGTGCCCCACGGCAAAAGAG
Egln3	AGTTACACGGAGGGGTCCTG
Egln3	AGTAGATACAGGTGATACAG
Egln3	GATGTCTCTACAGGCAATGG
Egln3	TGTTCTTCTGGTCAGACCGC
Eif2b2	AGGGGACAGCTTAAACATGG
Eif2b2	GGAGCACATCCACTCCAACG
Eif2b2	AGTCCTCAAGATCATCCGGG
Eif2b2	GACCACCACTGGAACAACGC
Eif2s1	GTTGTCATCACATACCTGGG
Eif2s1	TGTGATGACAACAACGACCC
Eif2s1	AGAGGAAGCAATCAAATGTG
Eif2s1	GTTGTTGTCATCACATACCT
Eif5	ATTACCTTAGCAATCAAACG
Eif5	GACCTCCTCCTCTAACAGGT
Eif5	GAGATCCATTGACAATGTAA
Eif5	AGAACTGGTCTGACACGCTG
Emc9	AGTCAAAGTCCACAAGATGC
Emc9	GTGGAAGAGGGGCACACAGT
Emc9	GAGGAGTCACGACAGATGGT
Emc9	GCATGACGGACAAGGCCAGA
Eml1	GAAGCGGCTGAAACTGGAGT
Eml1	GTTCACGGACCAGTCCAAGT
Eml1	GCTCATGCGAACCTTCACGT
Eml1	GACAGACGCAATGAAGTACA
Eml5	GACTTATGATGACAGCATGC
Eml5	GAATCCCAAACACAGATGTA
Eml5	GAAGTGATGATCGTTCAGTC
Eml5	GCAGTCCGGAAACTGAAAAA
Entpd5	AGACTGGAGCAGGTGAAAGG
Entpd5	GAAGCAGAGTGGATCTTTGG
Entpd5	AAGGAAGTGAGGTAGCCCCT
Entpd5	AGTGCTGTTAAACATCTCAA
Erh	ATACTTACACCAGACAGCTG
Erh	CGTCAATAAAATCAAACAAC
Erh	GGTAGGCTGTACCAGCAAAA
Erh	CTGGCTGATATCGTATGTGA
Esr2	GAAGTAGGAATGGTCAAGTG
Esr2	CGTGAGGGACATCATCATGG
Esr2	GAAGCTGGCTGACAAGGAAC
Esr2	TGACATGAGAAAGAAGCATC
Esrrb	AATGTGAGATCACCAAACGG
Esrrb	GCCGCCAGAAGTACAAGCGA
Esrrb	TGGATGGAGATTCTCATCTT
Esrrb	GGATGAGGAACACTCTCGCC
Evl	GTTTAAGCCATAGACCTGAC
Evl	TAAAGGGCTGAAGTACAATC
Evl	CGATGACACCAGTAAGAAGT
Evl	GATCGGTACCCACTTCTTAC
Exd2	GGTACCACTGAGCTTTCCTG
Exd2	GCTCAGTGGTACCTGGACAA
Exd2	GTAGAAGGGACTTGTCAAGT
Exd2	ATGGAGGCAGAACACTACCC
Exoc3l4	GCAGTGAGCGAATGGTACCT
Exoc3l4	GCTGTGGAAGGCACGCAAGT
Exoc3l4	GGTGATTAGCACGTCCACAG
Exoc3l4	GACCTTTGTCTACATTACGA
Exoc5	GTCAGCACGAAGTTGTACAA
Exoc5	TGGAAGGGGTAAACACACCT
Exoc5	GCTGAAGTGTCGCGCCAGGC
Exoc5	GCCAAGTATTGATACACATG
Fam161b	TGACAGGGGAGGAAGCCATC
Fam161b	GTAACTTGTTCAAAGAGATA
Fam161b	GGGCCTCACGCAGTGTCATG
Fam161b	GAATGGCTGAGGGACGGTGA
Fam177a	TGTCAGTGGAGAGACAATGG
Fam177a	TGTCAGTGGAGAGACAATGG
Fam177a	TTGCAGACAAAACTTACCTG
Fam177a	GCATGTAAAACCATAGGTAG
Fam179b	AGTGCTGGCAGACAACAAGT
Fam179b	GATATAGTGGAGCATTATGC
Fam179b	TGCCACAGAACAGAAAGTGC
Fam179b	GGAAGAAGGTGATCGCACCA
Fam181a	TGCGATGGTCCACAGAGCGG
Fam181a	GACCCGGCCAGGTTCCCATG
Fam181a	GCTGCACAGAAAAGGCCCTG
Fam181a	GCTGCCCGCCTCGTTCTGGG
Fam71d	GTATAGGAGGAGATACATAA
Fam71d	CGAGCAAACTGGGTGACCGT
Fam71d	TATAGGAGGAGATACATAAG
Fam71d	AATGGCCACAAACATCTCAG
Fancm	GTAGAAATTATACATGACCA
Fancm	GTCATTCCGAGATAGCGTTG
Fancm	CACCACAAGACACTTTACGT
Fancm	ATTGGTGGGGTAGATCCACA
Fbln5	GATGAAGGCAACCAGTGTGT
Fbln5	GCTCAGCAGGACACATACAG
Fbln5	GGGTCGAGAGTTCTATATGC
Fbln5	AGGCCCTCGATACACTGGGT
Fbxo33	GATGTGCACGATGAGCTCGC
Fbxo33	GCTGTCCTGTGGGTTTATGC
Fbxo33	GCCTCTTCTACCCAGCGCTG
Fbxo33	AGGAGGCCGAGGCCCGCAGC
Fbxo34	GGTAGAGAAAGACCGGCCGG
Fbxo34	GAAGAAAGAGCGCCCTCTTG
Fbxo34	AAGGGGATGTGTCCCTGTGC
Fbxo34	GATGGACTTGAAGTAGCGAC
Fcf1	GTATCGACAAGGATGTGGTA
Fcf1	AGTTGGTATCGACAAGGATG
Fcf1	TTTGAGGTCACGGTCAACTG
Fcf1	GCAGAATCGCTAAGGATCCA
Fermt2	GAAGCAGTACGCGCACTGGA
Fermt2	GATGCCAGATGGCTGCTACG
Fermt2	GACGGGATAAGGATGCCAGA
Fermt2	GTGACCGGGGAGGTGCACAT
Fitm1	GCAGCCGGCCACCAGTGGAG
Fitm1	AGACAGTGTAGCCCCTCCAC
Fitm1	GGTAGAGGCGCCGTAAGCAA
Fitm1	GCTGCCATAGGTAAGGTACC
Fkbp3	GGAGTAGGCAAGGTTATCAG
Fkbp3	AGGGGGATGTTGTTCACTGC
Fkbp3	GACTGGAGATCGAACCAGAA
Fkbp3	GTATCAAAAACAGTCCCATC
Flrt2	GATGGCCTACAAACTGACAT
Flrt2	TGTCACAGCGGCATACACTA
Flrt2	GATGGTGGGAAGTTTCGATG
Flrt2	CAGAAGTGGAAATACAACCG
Fntb	GCTGTGCATCATCGGCACAG
Fntb	GAAGCCCCCCGGCTGGACAC
Fntb	AGGATCCAGTAGCAGAGCCA
Fntb	AGGTGCCAGAACTGGGAAGG
Fos	GCTGACAGATACACTCCAAG
Fos	AGAGAAACGGAGAATCCGAA
Fos	GACTGGGTGGGGAGTCCGTA
Fos	TGTCACCGTGGGGATAAAGT
Foxa1	CGGGTCTGGAATACACACCT
Foxa1	GGGACCCAGGCCGTTCATGG
Foxa1	GCCACTGAGGCGCTGCCAAG
Foxa1	GCCGGCCCCTAAGCCCGTGT
Foxg1	GACGTGGGGGAAAAAGTAAC
Foxg1	AGCGCGTTGTAGCTGAACGG
Foxg1	GGAGCCGGCGCGGTCCATGA
Foxg1	AGCGACGACGTGTTCATCGG
Foxn3	GTATTGGGAAAGGGTCATTG
Foxn3	AGGCAGCTAAAGGAGTAGGG
Foxn3	AGTGATACAAAATGGAGCGA
Foxn3	GTATAGACAAAATCTAATTC
Frmd6	GTACAGTCTGTAGTAATGGA
Frmd6	AGAGGAGGCCTACTTCCTGC
Frmd6	ACGGCAATACGAAGTCACTT
Frmd6	GGAAGCTGGTCTACTACACA
Fscb	TAGGAAGGCAGGAATATAGA
Fscb	GAAAAGAATATGAGTCTCTT
Fscb	GAAGAGCTCTCCTTTAACTG
Fscb	TGTGGAAGCACAATTAACAT
Fut8	TGAAACAGTAGACCACGTGA
Fut8	GATGGAGGCTGTCTACAATG
Fut8	GGTACACAGAAAATTCACTT
Fut8	GTGGCTGGAAACCATTGGGA
G2e3	GACATCTTCGAATATCACAG
G2e3	AGTCCAGAGAGCCTCCAAAC
G2e3	TGATAACTTCGTTTACACGT
G2e3	GTTTCATAGAGACTGTTTAC
Galc	GTAATTTACTAGAAGCCGGG
Galc	CGGACGTTACAGCTAAACGA
Galc	GTAATGTTGGCGCAGGCTGT
Galc	GTCGGAGTCGTCTAGCACGT
Galnt16	GATGCCCAGATGGACATCTG
Galnt16	AGAGGCCGCTGACTGAATGC
Galnt16	ACTGTGAGGTGAATGTGGAG
Galnt16	ATCCAGAAAAGTGAGAACTG
Gch1	GCTGCTCAAGACGCCCTGGA
Gch1	AACAAGGTGATGCTCACACA
Gch1	AGGCTGCAAGGCTTCTGTGA
Gch1	GATGGCCACCGCAATCTGTT
Gemin2	AGTGTTGGAGAGTAACCTTC
Gemin2	GGCTCCACAGGTAACAACCG
Gemin2	ACTCTCCTCAGATATTCCTG
Gemin2	GATATTCCTGAGGCGTCCTG
Glrx5	CAGCCGCAGAATCTGCACCA
Glrx5	GCGTTGCTGAAGCCGCACTG
Glrx5	GCACGGTGTTCGCGACTATG
Glrx5	TCGCCGTTGAGGTACACTTG
Gmfb	CTGGAGAAAATAAAGCAGAG
Gmfb	TGACAAGGATGAACGCCTGG
Gmfb	GATTGACAAGGATGAACGCC
Gmfb	TTAAAGACGAACTACCCGAG
Gmpr2	GTCTACATGCACGTATGTAG
Gmpr2	GCTGCCAATATGGATACCGT
Gmpr2	CTCGGAAGAAAACTGGAGTG
Gmpr2	TGTGATGTTGGGTGGCATGC
Gng2	TGACTTGATGGCCTACTGTG
Gng2	CATAGCACAAGCCAGGAAGC
Gng2	CTTGGCATGTGCCTCACAGT
Gng2	AGCCAACATCGACAGGATAA
Gnpnat1	GTCGTTAGTGACGAGTGCAG
Gnpnat1	GAGTGCAGAGGGAAGCAACT
Gnpnat1	GTTGTGGAAGATGTGACCCT
Gnpnat1	TCGTTAGTGACGAGTGCAGA
Golga5	AGTGTTTGTAATCATCTACA
Golga5	AAAGAACAGGAACATTTCGC
Golga5	AGAGAGCTACAAACAAATGC
Golga5	GCATGGAATTGGAAGAACTT
Gpatch2l	AGGCAGGCAAGTGTACACTG
Gpatch2l	TGTGCAGCAGCAGTGACACG
Gpatch2l	GCAGGCAGGCAAGTGTACAC
Gpatch2l	GAAGCGAGTGACGTCCGAGG
Gphb5	GGGCCGCTGCGAGACCTGGG
Gphb5	GTAGAAAGGATCGACTCCAG
Gphb5	GATGGTCTCACACTCAGTGG
Gphb5	AGTCACATCGGACAGCCATA
Gphn	GATGCCAAGTCAGTATACAC
Gphn	GCCAAGTCAGTATACACCGG
Gphn	GTCAGGAGGTGTGTCCATGG
Gphn	GACCAGTGTGTGGAATAAGG
Gpr132	GCTCCGGAAGATCTGGTGAT
Gpr132	GAAGATGGTGACGACCGCGA
Gpr132	GATGTAAGCAGTCACCTTGC
Gpr132	TGAGCTGCTCTACATCAGCA
Gpr135	GGTCTGGGGAGGTTCTGTAA
Gpr135	GCTGCGCAGAAGCTGCGCCA
Gpr135	GTCCCGCGGCGGCCGCACGA
Gpr135	AGGAGGGGAAGTGGTCATGT
Gpr137c	GAGCGTGGAGAACTGTAGGC
Gpr137c	AGACTGGGGAACTCACGGGA
Gpr137c	GTCTCGCGTGGGCAGCGCTC
Gpr137c	AGATGGCACAGAGAATAAAC
Gpr33	GTAATAACGAGCAACACTGA
Gpr33	ATGCCCTACCATGTACACAG
Gpr33	GTTGTCCTGAAAACTAAATA
Gpr33	CATGAAGGGCAGAATCAATG
Gpr65	GCTGCTGTAAAAGTTCATGT
Gpr65	GGTAGACGACTGCTAAATAG
Gpr65	AGTCACAAAGCAGTACAGAA
Gpr65	AGCGGATGAGCACCATCACG
Gpr68	GAAGTAGAGGGACAGGCAGT
Gpr68	AGAGGAGGATGCCACACACC
Gpr68	GAAGTGAACAGATATAGAAC
Gpr68	GTGATTGAGGAAGTAGATGC
Gpx2	AAGGGAAGCCGAGAACTACC
Gpx2	GCTGGTACCCACCCCCAGGT
Gpx2	ACTCTGAGGAACAACTACCC
Gpx2	ATAGACTTCAATACGTTCAG
Gsc	GTACCCAGACGTGGGCACTC
Gsc	CAGGGCTTCGAGCTGCTCAT
Gsc	GCTCCCGAGTGCCCACGTCT
Gsc	GAGACACCAGTACAGAACCG
Gskip	GCTCACAGAAGCAGGGCTCA
Gskip	AGGGCTGAGAGTATCCAACA
Gskip	GTTTCCGAATGCTTCCCGGT
Gskip	GTAGACTGTCTCATGGTAGG
Gstz1	TGTGTGCTTAGTACCCCAAG
Gstz1	GTCAGAAATCATGCGCACGA
Gstz1	GAAGTACTGCGTAGGAGATG
Gstz1	AGACACTTGGAAAACCTCTA
Gtf2a1	GAATCAGGAACAATAACTTG
Gtf2a1	GAATAAACTAATGCAGTCTA
Gtf2a1	GCTGCAAGTTGATGGAACAG
Gtf2a1	AAGCCATTGGAGATGCAGAG
Gzmb	GCAGCCTGAGGCGATATGTG
Gzmb	GCCATGTAGGGTCGAGAGTG
Gzmb	CAGCCTGAGGCGATATGTGG
Gzmb	GACCCAGCAAGTCATCCCTA
Gzmd	GCACAAAGTCATCTTGAATC
Gzmd	AGACATAACGAATGCCATGT
Gzmd	AGGCGAAAAGTCCATATGCT
Gzmd	GTGTGTGACAACCAAGCATA
Haus4	GGAGGCTCACACCTGAACTG
Haus4	GAAGGTGTGGACGCTGACAG
Haus4	GAAGCCTCTGCAGCAAAGCG
Haus4	TGTGCCTCTAGGATTTCGTG
Heatr5a	GAAGAATGAATGAGACACAG
Heatr5a	GATGCAGACACAGAGTTCCA
Heatr5a	GCTCTTTGAGGATAACACAG
Heatr5a	CTGGTGCTTGCACTGCATTG
Hectd1	GTCACAGGCGAGCTCCACAA
Hectd1	GAAGGAAGGAATCTGCCCTA
Hectd1	GTTCTGGGGAGCGCTCCCAT
Hectd1	AGTGTGGCTACAGAACAGGC
Hhipl1	CAGCTGACGACACACCACGG
Hhipl1	GATTGGGGTACTCACAACCC
Hhipl1	AGGCCAATGGAAGTATAGCG
Hhipl1	AAGCTGGGTAAATCAGTCAC
Hif1a	AGTGCACCCTAACAAGCCGG
Hif1a	GATAACGTGAACAAATACAT
Hif1a	TGAACATCAAGTCAGCAACG
Hif1a	GCTAACAGATGACGGCGACA
Hnrnpc	TGGGAATCTCAACACTCTGG
Hnrnpc	GATCTGCAGCGGAGATGTAC
Hnrnpc	GATGTACAGTTACCCAGCGC
Hnrnpc	AAACAAACTCACCTAAAACC
Homez	AGATGGAGAAGGTAAAGACC
Homez	GACTGTGAGATACAACCCAA
Homez	GCTGCCCAGTACTTCTCCAA
Homez	ACGACCTTTGGAGAAGTACT
Hsp90aa1	GTATTGTCACAAGCACATAT
Hsp90aa1	GATGATCAAGGACATTAACT
Hsp90aa1	GGACTACTGTACCAGAATGA
Hsp90aa1	GTAACTTACAAAGAGAGTAA
Hspa2	GTGCTGGTGCAAGTGTACGA
Hspa2	GAGGATAGCCGCCTGCACAG
Hspa2	GATGCGCAACACGTTGAGGC
Hspa2	GAGATCGACTCGCTCTACGA
Ifi27	CTTACCAGCAGACTGCAGAA
Ifi27	GGAGGCTGCAATTCCTGAGG
Ifi27	AGAGGAGGCTGCAATTCCTG
Ifi27	AAGCCCACAGCACTCAGCGC
Ifi27l2a	CTTACCTGCTGATTGGAGTG
Ifi27l2a	CTGTTTGGCTCTGCCATAGG
Ifi27l2a	CCTGACACTTACCTGCTGAT
Ifi27l2a	CAGAGACAAACCTCCTCCTA
Ifi27l2b	AACAGCCACCAGGATGATGT
Ifi27l2b	AACAGCTCCAAGGATGATAT
Ifi27l2b	ACATCAACCAATATCATCCT
Ifi27l2b	AGGCCCTGACTCCTGCTCTC
Ift43	GGTCACGGTAGGTCATCACT
Ift43	GTCATTGTCCAGGTCACGGT
Ift43	GAAAGGCCGAGTACTTCATG
Ift43	CTGGGACCATCTGTACACCG
Il25	AGTGGGACGGAGTTGCCCAG
Il25	GACACTCACTCATAGCTCCA
Il25	GTTGCCCAGCGGGTCCATGT
Il25	GTTGGACAGGGACTTGAATC
Inf2	GTCCTCGGGACCCAGAATGA
Inf2	AGAGCTGGCGCACATAACCC
Inf2	CGCAGAGCGCAACTCCATGT
Inf2	GCAGCTGGGCACGAGAGCGG
Insm2	GATCTTCAGACCCAGCACCG
Insm2	GCAGATGAACTCCCCCAGCG
Insm2	GATGTGCCGGGTCAAGCCGG
Insm2	GCCTATCTGCGCAAGCACCT
Ipo4	AGTCCGTGATAACATCTGCG
Ipo4	GGGTCAGGACCGCTGCAAAC
Ipo4	GAACAGCCGAGACACAAACT
Ipo4	GCAGAAGGCTGAACAATCGC
Irf2bpl	AGTGTCTGCTACCGACATGA
Irf2bpl	CGTGGTTGCGTCAATTACGA
Irf2bpl	TGGCAAATGGTACAGCAGAG
Irf2bpl	GATGTACCAGGATTGCATGA
Irf9	AGCAACCCTACATTTCTGGG
Irf9	AGAGAATCTCATCACAGTGC
Irf9	AGGTGCACAGCCTAGACTGT
Irf9	TCTTGTTGAGGGCACAGCGT
Isca2	GGACGCAGCTGTCTGTGAGG
Isca2	GGCTTCTGGAAATCACCGAA
Isca2	ACAGGGTGGGGCAAGAGTGG
Isca2	AGGCTTCTGGAAATCACCGA
Ism2	GTTGCTGACCCGTGGCAAAG
Ism2	GCAGTGCAGGCATAGCCGCA
Ism2	CCTCCAGAGGGTATGCACAC
Ism2	GTCCCCCTTACACAGGATCC
Itpk1	GGTGGGCGAGTCCTACACAG
Itpk1	TGTGTGGGGAGGACACCATG
Itpk1	GGGGAGGGGATCCAAGACGA
Itpk1	AAGGGAAGAGAGTTGGCTAC
Jag2	TGCAGCTCGAAATAGCCCAT
Jag2	AGAGCAGATAGCGCCCACGG
Jag2	AGGTACCACCCGCTGCACAT
Jag2	TGGGGCCAGAACGACCTGGT
Jdp2	TAGACGAGGAAGAAGAGCGA
Jdp2	TGTCTGTACAGGAGTCAGAG
Jdp2	AAGTCGCTGCAGCCAGATGC
Jdp2	CGCTGACATCCGCAACATTG
Jkamp	GTAGGTACCAAAGCCAAAAG
Jkamp	GATGTGCTGGAAAAGAGCAC
Jkamp	CGCGTAATAAACGAACACGA
Jkamp	GTAAACAAGTAAAACAGAGC
Jph4	GGCGCCCAGGGAGAGTACAG
Jph4	TCAGCCACTGAGGTGTACGC
Jph4	GCTGTGGCCGGAGTCCAGGG
Jph4	CGTAACCGGCTGGTACACGG
Kcnh5	TTGCATGTAAAACCAAACAG
Kcnh5	GTAGAGGGAGGACACATACA
Kcnh5	GCAGAACAATATCGCCTGGC
Kcnh5	GAAATGCCCAAATTGTGGAC
Kcnk10	GTCATCTTTAAATACATCGA
Kcnk10	AGTTATGAAGTGGAAAACAG
Kcnk10	GCACTCGATGCTGATAACGC
Kcnk10	AAAAAGCGGGATCCCAAAGA
Kcnk13	AGATGCAGCAGACACCCATG
Kcnk13	GTAGCTCCAGCCCTCCATGG
Kcnk13	AGCATGACGTAGTACACAGA
Kcnk13	TGGCCACTGATGCCAAGCAT
Khnyn	GCACAAAGACGGTTATGTCA
Khnyn	GATGATCAGTGGCCTAACCG
Khnyn	TGTCATTGATGGCAGCAACG
Khnyn	TGAGGAGTCTGACAAGTGGA
Kif26a	TGAGATGTGCGCGATCATAG
Kif26a	TGTGGTAGAAAAGAGCAGTG
Kif26a	AAGAGCCAGGAGATAGCACA
Kif26a	AGAGTCAGCTGAATATCTGG
Klc1	TGATCCAGTATGCTTCACAG
Klc1	GAAGCTGGAGAAGCTCACGC
Klc1	AGACCAAGCAAGTGATCCAG
Klc1	GAAGGATGACGAGAGCAACC
Klhdc1	CGACAAAGGATACAGCAACC
Klhdc1	AGGAAGAACAGATATTCTGG
Klhdc1	AAGAGATGGAACTTACACCT
Klhdc1	GGACCTACGATATTGATAGT
Klhdc2	TGTGTTTGGTGGCAGATACC
Klhdc2	AGCCGCCCCAGACGAACATG
Klhdc2	TGGTTGTGCTAACAATCTGC
Klhdc2	TGCAGACAGAGGGTTACAGT
Klhl28	AGTGACCACCGACTACATAC
Klhl28	GCTGATAAGAGGATTCACTT
Klhl28	GGTTAAGTTAGCAAGCATGT
Klhl28	AGTACTTTGGGAGCACAGCG
Klhl33	TGGGCCCGGGCATTTCACTG
Klhl33	AGTGGGATGAGGGAGTCCCA
Klhl33	GCAGCTCTCTGGTAGACATG
Klhl33	GTGACTGAGGAGGTAATCGT
Ktn1	GGAATGTGAAAAATACAAGT
Ktn1	GATAAAAGAAGCTTTAAAGA
Ktn1	GATGGAATCCGAGCAAAAGA
Ktn1	GGAGCGATCGACTTACGTGA
L2hgdh	GCTATTGATTGTCCATACAC
L2hgdh	AAAGAAGGAGCCGTATTGCA
L2hgdh	CGGCATTGTGAACTACCAAC
L2hgdh	CAGACACTCACCCTGCAATA
L3hypdh	GCCACCTTCACACTCTACGA
L3hypdh	GAAGGCTACAGCTCCATGTG
L3hypdh	GTGGTGGACATGCACACAGG
L3hypdh	TCGGTGGTGGACATGCACAC
Lgals3	ACGAAGCAGGACAATAACTG
Lgals3	CATGATTGTGATCAGCATGC
Lgals3	AAGGATATCCGGGTGCATGG
Lgals3	TGAAGTGGTCAGCTTCAACC
Lgmn	GGAGTCCTGAAGGACTACAC
Lgmn	GTTCCGGTGGATGATCTGGT
Lgmn	GGATGGAGGCAAGCACTGGG
Lgmn	AGGAAACACCAGGATCCCGG
Lin52	GATGACATTGATATGTTGAA
Lin52	AAGCTCTCCACCGAAATGGA
Lin52	ATCTCAGCCATCCATTTCGG
Lin52	AACCTGATGGAGAAGGTACG
Lrfn5	AGGGTCAAAGGGCAACACTG
Lrfn5	AAGGGCAAAAACATCATCGA
Lrfn5	AGGGGAAGCAACACAAACCG
Lrfn5	GATGCAACCCACGACTCTTG
Lrp10	CTTGCTGCCCAGGATAACCC
Lrp10	GCTGAGCAGCTGGAATGCAG
Lrp10	GATGCAGTGCATGTGTATGA
Lrp10	AGGCCAGAGCCCAAGCCACA
Lrr1	TGGAGTGTGGAAGTACACAA
Lrr1	GAGCTGCTGATAGAAAACGG
Lrr1	ATGAGGGGAAAGCCACTGTC
Lrr1	CAGGCAGGGAACCAGCTACA
Lrrc16b	AGTCCTGAGAACCATCCAGG
Lrrc16b	GCTCCGCGGATGAAGTTCCG
Lrrc16b	GCAGAGGCCACGTGGCACAT
Lrrc16b	GAACTTTAAGGGGAAAAAGG
Lrrc9	GATTGCTGAATGCTGCATAG
Lrrc9	CGGCAAGTGGTAGAGCACGT
Lrrc9	CAGAGCGTACGGCATCACGG
Lrrc9	TGAATTTGAGTACACTACAG
Ltb4r1	GATGGTTATAAGCAGGACAC
Ltb4r1	GATGCCTGCCAGCACCCATC
Ltb4r1	GGTGCTGGCAGGCATCTGGG
Ltb4r1	GACTCATGATGGTTATAAGC
Ltb4r2	GGTCCCAAAAGGCAAGACGA
Ltb4r2	GACACACGCGCCCGCCCCAG
Ltb4r2	GCGGTCTACCGCCACCTCTG
Ltb4r2	GGGCCAGGTGGGCTGCAAGG
Ltbp2	GATCCGATGAACCAAAGGCA
Ltbp2	TGGGCGATGCAGCAACACGG
Ltbp2	GTTCAGAGTAGCATTCCATG
Ltbp2	GCCACCCTGACTGTACAAGG
Map3k9	GGACAGCTGAACCAGCGGGT
Map3k9	GAACATCATTGCGCTCAGAG
Map3k9	GGGCCGTGCAGATCGCCAGA
Map3k9	GGGCATTGATGGCTTAGCAG
Map4k5	TGGATTTGCATGGAGTACTG
Map4k5	TGATAGCCACACAAACCATG
Map4k5	CGGCCCAGATATCACAGAGT
Map4k5	GTTGTGAGAGTAGAGCTGAA
Mapk1ip1l	GTCCTGAAGGCACTTGGTAA
Mapk1ip1l	AAGCTGGCCATTCTTCTCAA
Mapk1ip1l	ATGGAGGGATACATTCCTGT
Mapk1ip1l	GGATCTGTGGGCGCACCATA
Mark3	TTGGTGGCAATACTGTACTG
Mark3	TGAGAGAGAGAGTACTCCGC
Mark3	GGGTGTAGAGAATGACACCG
Mark3	AGTTAAACGGGGCACTCTCG
Max	ATGCACTGGAACGAAAACGT
Max	GGAGTCTGAACCCCCATCGA
Max	AGTATATCCAGTATATGCGA
Max	AGACAGCTTTCACAGTTTGC
Mbip	GACTTCGCAGAGGACCTCGC
Mbip	AGGAGCGAAAGACTTCGCAG
Mbip	GCTCACCTGCGATTGCAGAC
Mbip	GAAGTAGTTCAGATCAAGGC
Mdga2	GTAAAGCAGAGAATGGCTTG
Mdga2	AACATTCAGAGACACCAAGG
Mdga2	GGTTGGAATTGGCCACACAT
Mdga2	TGGATGTCCAGTAACCAGGC
Mdp1	GAACATCCAATTGTACCCGG
Mdp1	GGAACTGTACGAGACAGGCG
Mdp1	ATTCAGCGGGAAATCTACCC
Mdp1	CGTTACCTGCATTCACATCC
Med6	ATCAGTTATAAACTCCAGAG
Med6	GCCCCTTTCAGTCAGATGGT
Med6	GCTGATTACTATATCATCGC
Med6	CATCGCTGGAGTCATCTATC
Mettl17	ATGGCAGCCAGATTGGACGG
Mettl17	ACGCTGTGGTGACAGCCCGT
Mettl17	TGTGCCCGTCTGGACAACAG
Mettl17	AGGACGGGCTGCGTGATTCG
Mettl3	AGAGAATGTCTGAACCTCTG
Mettl3	AGCTCCATGTGAATATCCCA
Mettl3	GAGAATGTCTGAACCTCTGG
Mettl3	AGGTCAAGGCCAGATCTGAG
Mfsd7c	GCACATGGACAGCCAATCAA
Mfsd7c	TGTTGGGTACCAGAACAGGA
Mfsd7c	AGTCATGATATACACTACCA
Mfsd7c	CAGACCGAAGCAATGCGTGA
Mgat2	TGCCTACGGACACAGCAAGG
Mgat2	AGAGAGAGGACGTCACACCC
Mgat2	GCCATAGAAACTCCGAATGG
Mgat2	GTTCCGCATCTACAAACGGA
Mia2	GAAGTTCAGGTACCGACAGT
Mia2	GACCTGGAGAAATTACACAG
Mia2	TTAGCCCTGAGAGATTACAC
Mia2	TCGGTACCTGAACTTCACTA
Mipol1	AGTTGAACAGTACAAAAGGC
Mipol1	GACATTGCGGAAAGGACTGC
Mipol1	GAATAAACAATGCAGACACT
Mipol1	AAGGGGCATCTGCAGAGTGC
Mis18bp1	TATATGTGTAGAAGGAAAGC
Mis18bp1	TGATTAGGCAGTCCACCTAC
Mis18bp1	TGTGGAGTAGTGCTTCTCAA
Mis18bp1	GACAAGGAGCAGTAGCATGT
Mlh3	GAAGCTAGTGAGCTTCGAAG
Mlh3	TGTGACTAAGAGTATTGTGG
Mlh3	GTTCTGCCTCAGAACTCCAC
Mlh3	TGCGTTCATGGGCAGCATGC
Mmp14	GGGCTCGGCAGAATCAAAGT
Mmp14	TAGTACCGGCAGGACCACGG
Mmp14	TGGGTACGCAGGTCCCCTGG
Mmp14	GACGGAGGTGATCATCATTG
Mnat1	AGAAGGGTTCCGGTACTTGG
Mnat1	ACTGAGAAAGAGCAACTTCA
Mnat1	TTGTAGGTGTGAGAGTTGTG
Mnat1	GCCAAGAACATGAGCAGCGA
Moap1	AGTGCAATAGCCTTCTAATT
Moap1	CTTCTAATTCGGCCTGAAGG
Moap1	AGCCTTCTAATTCGGCCTGA
Moap1	CTCCTTCAGGCCGAATTAGA
Mok	GTCGGTGAGGAGACACTCTG
Mok	GCTGCTTGGAATAGACACTC
Mok	TGCGAGAGATCCAAGCACTG
Mok	AATATTTATGAGCTAATACG
Mpp5	GGTGCAATGAAGATGATATA
Mpp5	GTCAAGAAGATCCAAATTGG
Mpp5	GTAACAGAGGAATCAGACAG
Mpp5	GAAAGTATCGGCCATTACGG
Mrpl52	GAGATTGCACTGCAGCGTAG
Mrpl52	TGAGGGGCCCATAGCCGGAA
Mrpl52	GAATACAGGCATGGAAGCTC
Mrpl52	GCACTCACTGGAGTCGCCAC
Mta1	GATAAAGGGGAAATTCGTGT
Mta1	GACAGCCAACGGGAATGTGG
Mta1	TGAGAACTACCTGATGTGGG
Mta1	ACATATTGGAAGAAATATGG
Mthfd1	AGGGCCCTTAAGATGCACGG
Mthfd1	GATTGCCGGAAGGCACGCGG
Mthfd1	GAAACCATAACATGGCAGAG
Mthfd1	GGAAGAGTACCACCACGATC
Myh6	GCAAGTGTACTATTCCATCG
Myh6	GTTGCCGAAGGCCTCCAGAG
Myh6	CAACCTCAAGGAGCGCTACG
Myh6	CGTGAAGCTCAGCACATCAA
Myh7	GAAGATCCGAAAGCAACTGG
Myh7	AGACCTTCTGGAAAAATCCA
Myh7	AGTGAAGCCCAGCACGTCAA
Myh7	AGATGAACGCATAATCGTAG
Naa30	GGTTGAAGGAGACTGTGACG
Naa30	GTAGGGTTCAGACAGATCTT
Naa30	TAGCCGTGGACTCCAAATAC
Naa30	CTTACCAAGAAACACAGCTG
Ndrg2	GAATTGATACAAAAGTACAG
Ndrg2	GTAAAAGTGACCGAGCCATA
Ndrg2	ATATCCCCGAACCGAAACAG
Ndrg2	GATGGACTGGGCAGCCCACA
Nedd8	GCTGATTACAAGATTCTAGG
Nedd8	GAAGATGCTAATTAAAGTGA
Nedd8	AGACATCGAACCCACAGACA
Nedd8	CTGGTGTTGGCTCTTAGAGG
Nek9	GTTGCAGGACGACTCACTGG
Nek9	GGAGAAGGAACTATATACCT
Nek9	TGTGTTGCAGGACGACTCAC
Nek9	GAACAATGGAAGCAGACCGT
Nemf	GTTCCGCGAGCACTGCGCGG
Nemf	TGTTATCACTAGTGCTTGGT
Nemf	GCTTCAGTCAAAGTCCGTGG
Nemf	GTGTTATCACTAGTGCTTGG
Nfatc4	GCAGCTGGAGCTGAGGATCG
Nfatc4	GAAGGAAAGAGACTGAAGGT
Nfatc4	AGTCAGTGGTACCAAAGTGT
Nfatc4	GAAATTCAGACATTGAGCTA
Nfkbia	AGTCACCAAGTGCTCCACGA
Nfkbia	GCCCCAGGTAAGCTGGTAGG
Nfkbia	AGGCTAGGTGCAGACACGTG
Nfkbia	GCTCACAGGCAAGATGTAGA
Ngb	GGACAGTGCCATGTTCCAGA
Ngb	CAGCTTGGGCAGGAAGCATC
Ngb	TGATGCTGCAGTGACCAACG
Ngb	GGAGAGGAGAGACAGTCCTC
Ngdn	CAACTATGAAGAGAGCATGA
Ngdn	GAGGCTGGTGGAGATTCGCA
Ngdn	AGCGAGAGAAAGGACTGCGA
Ngdn	TGTACTGGAACCAAGCGTGG
Nid2	AGCCTGCTGGAACACTACGG
Nid2	GTATCACTCAAACTGCCGAG
Nid2	GATCTACACGCTTACATCGT
Nid2	GAATCCACGAGCCATCACTG
Nin	GTCTGGGGAAGAGATCGAGG
Nin	GACGGAAGAGAATTACATCC
Nin	AAGAGGTTTGTGAAGATCTG
Nin	GAAACGGCATCTCTCTATGC
Nkx2-1	GTTGCAGTAGCCCCCCACGG
Nkx2-1	GCACCCCCGCCGCCGTCATG
Nkx2-1	CGCCGCCTACCACATGACGG
Nkx2-1	GAGGAAAGCTACAAGAAAGT
Nkx2-9	GAAGCCGAGGCGTCCAGAGG
Nkx2-9	CGTGAAGCCGAGGCGTCCAG
Nkx2-9	GAGCTGGTGGTGCTAAGTGC
Nkx2-9	GTTCTCCAAGGCCCAGACCT
Nop9	GCAGCCGGGGATAACCATCG
Nop9	AGACACGCATGGCAGCTTCG
Nop9	AGCAGCAAAGAGAGGCACGC
Nop9	TGAGGGAGGTGACTGTACTT
Nova1	GCAGAACGGGACCCATACGG
Nova1	TGTCTGCAGGTACTACTGAG
Nova1	GTCTGCAGGTACTACTGAGA
Nova1	GAAGGGAGGTGCTACTGTGA
Noxred1	ACAGCAGAGGAACAACACTT
Noxred1	AGGTGAGTTACGGAAACTAG
Noxred1	CAGTAGTCAGATCAAACCAG
Noxred1	ATACCTGGGTAGCGGAATGG
Npas3	GATGAAAAAGGACCGTTCAA
Npas3	GAAGTATTTGAAGCACATTT
Npas3	GAGGCCTAGGTAGATAGAGA
Npas3	AGGTGATTCACATAACAGGC
Npc2	GATCCCTGTCAGCTGCACAA
Npc2	CGCCAGCAGCAGGATCGTGG
Npc2	TAAGGTGGGAGTTATAAAGG
Npc2	CAGCGCCAGCAGCAGGATCG
Nrde2	GGTGCCCGGCAACACAGGGT
Nrde2	GACAGCGGAGAACCACGCGT
Nrde2	GATGCGTAAGGCCAGTCTCG
Nrde2	GTTACGGTACGAGATTGCAA
Nrl	GTATGGTGTGGAGCCCAACG
Nrl	GATGAAGTTCGAAATAAAGC
Nrl	GACAAGCCTGAGCGTAGCCG
Nrl	GAAGGAGGCACCGAGCTGTA
Nrxn3	AGGGATGGTCGTCGGCATTG
Nrxn3	AGTACAGGAACAGGGACGAG
Nrxn3	GGACTCCCGGATCACCTCTG
Nrxn3	AGAGCCCAGAGAGTTGACCT
Nubpl	GCAATACCATAATTCAAAAG
Nubpl	CCACTTCGGAAGCAATATGC
Nubpl	GTTGGAAAGTCTACCACCGC
Nubpl	GATGGATGCACACAAGGGTG
Nudt14	GTGATGGTGGAACTCTGTGC
Nudt14	AAGGAGGCTTGGGAAGAGTG
Nudt14	GGTAGGGCGAATGGGCACAG
Nudt14	TGACATCCCCAAGACTCTCG
Numb	AGTTGTGGACGAGAAAACTA
Numb	GAAAGACTGAGCCACGCCGT
Numb	GTAGAAGTTGATGAGTCAAG
Numb	ATGACAGATCCATCGCCGAG
Nynrin	GCAGCTGAAGAAAAACCGGA
Nynrin	GGCAGCTGAAGAAAAACCGG
Nynrin	AGGGGGACCAGGCACCAGGT
Nynrin	CAGCTGCAGCCAAAAGTAAG
Olfr1507	AAGGTGTGTATGGTGCTAGG
Olfr1507	AGAGATGCAGGAAAAATATC
Olfr1507	TGGCCATTTGTAAACCTTTG
Olfr1507	CAGGCCAGTTCGATCACCTG
Olfr1508	TAACAATCATATATGACCGC
Olfr1508	GTGAGGTGAGAGATATGGAA
Olfr1508	CTGGAAGGTGTGTATGATGC
Olfr1508	GATGGTCCCCCCTGTCCATA
Olfr1509	AGACTATGGTAACAACAATG
Olfr1509	AATGAGAGGATTCAACAAAG
Olfr1509	CGAGTGTAGAGGAAGATACA
Olfr1509	CTGCTCAGCCCACTTCATGG
Olfr1511	GAAGTTGTGCACAATTCTAG
Olfr1511	GTGAAGTTTAATATAATCCG
Olfr1511	ACCAAATGCGATAACCTTGC
Olfr1511	GCCAGCAAGGTTATCGCATT
Olfr1512	GTGTTTCCTATACACCACTA
Olfr1512	TGCTAAGTTGAGTATCTTGC
Olfr1512	TAAGTTGAGTATCTTGCTGG
Olfr1512	TGCTGTGGCTGTCAGGTCGA
Olfr1513	ATGGCTGTCAGGTCGCAGGT
Olfr1513	AGGAGGTGAAGATGGCCTTG
Olfr1513	ATGTTATCTCTACACCACTA
Olfr1513	TGCCATGGCTGTCAGGTCGC
Olfr221	AGCAATGAGATAGCACTCGC
Olfr221	ACACAGCGAAGTGTCCACGC
Olfr221	TGTAGATCACGGCAACTGTG
Olfr221	ACATTGGGAGACACTATGGT
Olfr722	GAGTGGAGTAGTATAAAGGA
Olfr722	AAGCCACAGAGCCAACAATA
Olfr722	TCCCAGAAAGAAGTAAAGTG
Olfr722	AGGAAGTGAAAACTTCTATG
Olfr723	TGTTCTTCATGCATTTCTTT
Olfr723	GGAAAGACACATGTCCAGGA
Olfr723	GAAGGCCATGACTATCAAAA
Olfr723	GAAAGTACATGGGAGAATGA
Olfr724	ACAGGATAATCATGAGTCAC
Olfr724	TTTCAGCACCCCCCAAAAAA
Olfr724	GTTTCCAAGAAGAAAATACA
Olfr724	GAAGGCCATGACTATCAAAA
Olfr725	AGTAATTAAAACCACAGTGT
Olfr725	CTTGGTCATCTCCTACACTG
Olfr725	GGGATCAGTATATGAAACCT
Olfr725	TCTCACCACCACCAAATAGA
Olfr726	TGTGTCCATCAATTTGCTGG
Olfr726	TTTCACCACCAGCAAATTGA
Olfr726	TGACCAGAGTGATACACACA
Olfr726	GGATGAAACCCACAAACCAG
Olfr727	AGACGAGAATGATACATACA
Olfr727	CAGTGTAGGAGACAACCAAG
Olfr727	CATCCATACAACTAGTCAGT
Olfr727	GTCTGCATTTCCTGGTTTGT
Olfr728	TTGTAGCTATGGGATATGAC
Olfr728	GTGCATGGATACGTACAGAA
Olfr728	GATTCACTGTAAATGCCAAA
Olfr728	AGAGACCAAAATGATGATAT
Olfr729	AGTAATGTATGAGTCAATGC
Olfr729	AGCCCAAGAGATTACTACCA
Olfr729	TGCCTTGGTAGTAATCTCTT
Olfr729	GGATAACACCAATTATTCAG
Olfr730	GAAAATACATAGCAGAGTGT
Olfr730	ACAGCTGGAACACCACAGGA
Olfr730	CACCTGGGGACTTATGATTG
Olfr730	ACAAAGGCAATACACACCTG
Olfr733	GACCACAGAAGGGCAAGCGG
Olfr733	ATGACAGTGGAGTAATACAA
Olfr733	GAAAGCACACAAGGGTAAGC
Olfr733	TGCTCTATCAGCTGACAAAG
Olfr734	TGTCAGCAGGAACATCTCAG
Olfr734	GGCGGCAGATGGCAGCGTAG
Olfr734	GGTGATGTGGGAATAACAAG
Olfr734	TGATGGTAGCATAGTGGAGA
Olfr735	AAAGTGAAGAAAGAATACCT
Olfr735	GATTTCCCAGGACAATAACC
Olfr735	TCCACAGAGAAGGTACAGAA
Olfr735	AGTAATCAAGATGAGAGCAT
Olfr738	GTATATCACAGGATTAAGGA
Olfr738	TGTATATCACAGGATTAAGG
Olfr738	AAATGGAACAAATAAAAGCA
Olfr738	GTCTTATGCTCTAGTAATGA
Olfr739	AGCTCCAACAACACCATCAC
Olfr739	GAACAGGTGAGGGCCAACAG
Olfr739	AACAGGTGAGGGCCAACAGA
Olfr739	GATCCCATGATGCAGAAAAA
Olfr740	TGTTGCCCATGAGGGTAAGC
Olfr740	TGAAGAGGAAAGGAACGAAC
Olfr740	GCCCAAGAGAATGAAGCCAG
Olfr740	GCATCATCTTTGCAGTATGC
Olfr742	TGAAGAAGGTCACAAAGAGG
Olfr742	GAAGTCTAAACACAGCTCTT
Olfr742	CATCATGGGAACTTACATAT
Olfr742	TATATCACAGGATTAAGTAG
Olfr743	CGTTGCCCATGAGGATGAGT
Olfr743	CTGTGGGTCACATGTGACTG
Olfr743	TGTCTACCTACTCATCCTCA
Olfr743	CAGCTTCGTGTCCAGATGAT
Olfr744	AGACCCACAGAACGACACCT
Olfr744	TGAGTGCTAGCAGAGGACCT
Olfr744	TATCACAGGATTGAGGAGTG
Olfr744	TAGCCCTGAAGGAAATTCTG
Olfr745	GATGAGAGGATTTAAGAGGG
Olfr745	AGCTCTGAGTACTAGAGTAT
Olfr745	GTGCTGTGAGATGGGATCAG
Olfr745	GAACTTCCTAGTCATGATAG
Olfr747	AGGACATGAAACTTGCTCTG
Olfr747	GCTCTGAGGAAAGTTCTGTT
Olfr747	TAGTAGGGTAATGTAATGGG
Olfr747	AGCCTTGAGCAACAAAATAT
Olfr749	GCTCTGAGAAATGTTCTGTT
Olfr749	ACTCTTCTATGGTACAGTAA
Olfr749	AGGATCTTCTGCATCAAAAT
Olfr749	TGGTAGGGTAATGTAATGGG
Olfr750	GGCCAACAGTAGGAACTCAG
Olfr750	GAGGAGTCCCCCCATCCAGC
Olfr750	CAGACATGACGGCCAACAGT
Olfr750	TCTGGGATGGCCTTACGTAG
Osgep	TGTGAGCGGAGGAAATACCC
Osgep	AGCTCTTTGCAACAGATGAG
Osgep	GCCGTGACGTAAGTGCGCCG
Osgep	GAGCGAGCCATGGCACACTG
Otub2	GATTTACCAGAGGAAAATCC
Otub2	AGACGGAAACTGCTTCTACA
Otub2	GTTCTTACGCCTCCTCACGT
Otub2	GAACCACCACGTGTTCCCCG
Otx2	GAAGCCTGAGTATAGGTCAT
Otx2	GGAGAGGACGACATTTACTA
Otx2	GTAACAGCATTGGTACCCAT
Otx2	GATGTCTGGGTACCGGGTCT
Oxa1l	GTTCTGGATGAGACCCACCG
Oxa1l	TGGTAGTCACTGCCACAATG
Oxa1l	TTGGCACAGGGAGAACACGT
Oxa1l	TGCGCACAGCTGGAATCCGG
Pabpn1	GATGCCCGCTCTATCTACGT
Pabpn1	TGTCACAGAGTATAGTAACA
Pabpn1	GACCTGTAGATTCGACCCCG
Pabpn1	GCTAAAGGAGCTACAAAACG
Pacs2	GATCCTGGGCTACAAAACGC
Pacs2	TGTCTCACAAGACACCTGAC
Pacs2	GGAGCCGTCCACCTCCCAGG
Pacs2	CGCCACTGCGATCTTCACAG
Papln	GTTGAGTGTTGCATGAACGT
Papln	GCTGCCAGCAGGAATTTCCT
Papln	AATAGTGCAGAATACCAGGC
Papln	CGATGCCACAAAGTACCAAC
Papola	TAGCCCAGGAAACACCACCG
Papola	TAGGCAGTCAGTCTCCTTGG
Papola	GGAATCAAAAATCCGCATCC
Papola	GAAGAATGAGTTTATTACAC
Parp2	GAGGACGCAAAGCACAGTGT
Parp2	GACACCAAGAGAGCCCCGCT
Parp2	AAAGACGGGGCAGCACAGCT
Parp2	GCTGACAGTGGCGCAAATCA
Pax9	GATGTGTTTCACCACAGTAG
Pax9	GATGCCCAGAATGTCCGTGA
Pax9	AGCTCCCGGCAAAATCGAAC
Pax9	CGTGCGAGACCCGTAGCTGG
Pck2	GGCACGGGTAGAAAGCAAGA
Pck2	AGTGAGCTGCACTCCAATGC
Pck2	TGCAGGGAAAAAGCGCTACG
Pck2	GTGCCCAAGAGACTCCCATT
Pcnx	TGAACAAGGAATGTGTCCGA
Pcnx	GATGGCTTCGTAGAGCACAG
Pcnx	TGAGGGGCGACACGAAGATC
Pcnx	GGAGCTGCTGAGGAAAGTCG
Pcnxl4	TGAGGAACGGTACAGCATCC
Pcnxl4	GATGCCAGGAATGTGCTGAC
Pcnxl4	CTGGTGGTAGAACACACTGT
Pcnxl4	GGAGCCTTGATACAGGAATC
Peli2	AGCGTGAAAAAGGCCATCTG
Peli2	GTCACGGAGCCAGACGGTAG
Peli2	GGCGTAGGTCCGCTTATAGA
Peli2	CTGGTGATGCACCCGCAAGG
Pgf	AGGATGTGCTCTGTGAATGC
Pgf	GAAATGTGGATCCCGATTGG
Pgf	ATATGTGAGACACCTCATCA
Pgf	AGCCACTACAGCGACTCAGA
Pigh	GCACAGGGTGAAGAGCCCGT
Pigh	GCTCCTTCAGTAAAATGCAG
Pigh	GGTCAATCTTCACAAAATGG
Pigh	GGCCGCCAGCCACACCGCGC
Pld4	GATGGGCGACACATCTACGT
Pld4	AGTGAGGGACCAGTAGTACG
Pld4	GATCCCGGGTCCGGCCATGC
Pld4	GAAAACATTCCAGACCTACT
Plek2	GGAGATGAGCCAGTCCACCA
Plek2	GGCTTCCAGGAAGTACTCAG
Plek2	GCACAAGAGGAAAAACTGGA
Plek2	GTTCTCTTCCATAAGCATGG
Plekhd1	TTGGCCGAGGATCTCCCGAA
Plekhd1	GTTTGAGCAGACACAATGGC
Plekhd1	AGAGTCCTTACAGCATACGC
Plekhd1	GAACTCCGTGTACATCCATA
Plekhg3	GCAGGACCTACGGAGCATTG
Plekhg3	GGACCTACGGAGCATTGTGG
Plekhg3	GTACCAGGCCACGCACGTCA
Plekhg3	GGAAGAGGATGGCTTCGAGG
Plekhh1	GCTGCTGTTTGACATACCAG
Plekhh1	GCTGTCCTCCCACTGCACGC
Plekhh1	AGGTAGATGCGGATGCACTC
Plekhh1	GGAGAGCAGGATCTACGCGA
Pnma1	CAGGCCTAGCTGCAAGAGGG
Pnma1	CTCCAGGCCTAGCTGCAAGA
Pnma1	GGACTCAGAAGTGCCCCTCC
Pnma1	TCTTGCAGCTAGGCCTGGAG
Pnn	GACAAGAAGAGAATCACGCC
Pnn	GGCGGGACCCGAATGATGTG
Pnn	GTGCTAAGCAGACGGAGCTG
Pnn	TCAACAAGCCAAATATTCGT
Pnp	TGAGTGAGAAACCAAAGACA
Pnp	CTGCCACAGTCTCAAAGTTG
Pnp	CAGGTCAGCTGCCACGATCC
Pnp	AGCATTCCACTCCCGGATCG
Pole2	GCTCTGTACCAGTTCCACAG
Pole2	ACGTGTAATCATATGCCCAG
Pole2	GGACGGGGCATACGTAAAGA
Pole2	ACTCGCTGAAAGCATCACAC
Pomt2	AGAGTCCAATGGCAGGACTG
Pomt2	GTAGTCCTTATGCAAATAGG
Pomt2	GCACCAAAGGCAGCACTATG
Pomt2	GCCGCAGGAGAGTATCCCAT
Poteg	GTTGTACTGAAGCAGTAGGG
Poteg	AATGGGAGCAGACATACACG
Poteg	GTTGTACACAGCGTAGTGCA
Poteg	GAATGGTCACTACTGGTAGC
Ppm1a	GCATCACGTGGACTAAGTCA
Ppm1a	TGGGGAGACAAGCTGCTCTG
Ppm1a	GATGGCATCTGGGACGTCAT
Ppm1a	GCTGTGATCGGTTTGCCAAG
Ppp1r13b	AGTGCAGAGGATCATCTATG
Ppp1r13b	GTTGCCACCTGGCTGAAGTG
Ppp1r13b	GCAGAAACTTCACGATATGG
Ppp1r13b	GATGAGCTGTCCTTCCATGA
Ppp1r36	CAGCAGCGTAGACAAAACTG
Ppp1r36	AGAGAAGAAGCGCATGACAT
Ppp1r36	TGGACAGCGGAGCTTCGGAA
Ppp1r36	GAAGAATCCCCAAAGCCGCG
Ppp1r3e	GTTATCCCAGAACTCTCGGC
Ppp1r3e	GAGTTCTGGGATAACAACGG
Ppp1r3e	AGAACTCTCGGCCGGTAACC
Ppp1r3e	ATAAAATGGATCCAGCCCTG
Ppp2r3c	TGTTGGGCGACGCTAACCGC
Ppp2r3c	AGTTCTATAAGACCATACCC
Ppp2r3c	CTTACCCTGTAATAAAACCG
Ppp2r3c	GTCCATATGAATCTGTATGA
Ppp2r5c	GTTTCCTGATGTAAGCACGC
Ppp2r5c	AGAGCATCACAATGGCATAG
Ppp2r5c	GTATAAGGACGGAAACATGA
Ppp2r5c	GAAAGAGCGAGAAGAAGCAT
Ppp2r5e	GTTGTACACCAATGCCACAA
Ppp2r5e	GACTACATTACAATAAGCAG
Ppp2r5e	AGAAGATGAACCTACCCTCG
Ppp2r5e	GGCATCATGGCCCCACTTAC
Ppp4r4	GCACTTCAGGGTCATGACAA
Ppp4r4	TGGTCACTCGATATGATATG
Ppp4r4	GCTAACTAAACGCGACTGGA
Ppp4r4	TGGAAGGTTTGCAATCACAC
Prima1	GACAGTCAGAAACACCAGGG
Prima1	GCACAGTGCAGCAGAAGTGA
Prima1	CCTGAACTAAACCCCAGAGT
Prima1	ACCTGAACTAAACCCCAGAG
Prkch	GAAGTTCAATGGCTATCTGA
Prkch	ACAAAGTGGTCATAACCCAG
Prkch	AGGCTGTAACAATTAGATGA
Prkch	AGTGAACGGACATAAGTTCA
Prkd1	GTAGTGATTTCAAAACAATG
Prkd1	CGGGTTGGGTGGATACATGA
Prkd1	ACTGTGGAGAAATGCTGTGG
Prkd1	TAAAAGGGAAGGTACCACTC
Prmt5	GATGTGGTTGGTCAGAACTC
Prmt5	GATATTGAGAGTATTTGATG
Prmt5	GAAACTCCAAGGTACAGTAG
Prmt5	GAAAGTGTGGTACGAGTGGG
Prox2	GAACCACTTGATCATCTGGG
Prox2	GAACTCCTTCAGTGTCAGGG
Prox2	AGAGTAGAGACCATTGTCCG
Prox2	GCAGGGTGGCAAGAGCAAGT
Prpf39	GAAGAGTAAGTTTAGAACGA
Prpf39	AGACAAACACTACAATAAGA
Prpf39	GCTTCTGTAAATGGACACAG
Prpf39	ATGAGCATGAAGTTAGTAAG
Psen1	GGGCTGCACAAGGTAATCCG
Psen1	GATCAGTATGGCTACAAAGC
Psen1	GCCATGCGGTCCATTCGGGG
Psen1	GCATTCTGGAAGTAGGACAA
Psma3	TCCATCAGGAGAGAACGTAG
Psma3	TCACATATGAAACACCTGAT
Psma3	GACAGAGATAGAAAAGCTTC
Psma3	CCAAGTTGAATATGCCATGA
Psma6	GAACAAGTGAGTCACTGTGC
Psma6	GAGGGCCGACTCTACCAAGT
Psma6	GGTACAGAGGGCACGCTATG
Psma6	TGAAGCTGACAGCAGATCCC
Psmb11	TGGCATGGGCCACAGCACAG
Psmb11	GCCACGATCAAGCACACCAT
Psmb11	GTCCTCCTGTGGCAGCTATG
Psmb11	AGCACAGCGGGCCAGGGTGT
Psmb5	TGGCTTGGTAGATGGCTCGG
Psmb5	GAGCACCTTGAAGGCCAGGG
Psmb5	GCTTCACGGAACCACCACCC
Psmb5	AAAGGCATGGGGCTGTCTAT
Psmc1	GCCAACCACTCGCAAGAAAG
Psmc1	AGAAATTCAGCGAACAATGT
Psmc1	GTTACCCAGTGGCAGTTTGC
Psmc1	GCTGCCAGCAAACTGCCACT
Psmc6	GATATATTGAAAATCCACGC
Psmc6	TGACCACACTAACCATCATG
Psmc6	GATGCATGGCTGGTGGTCCC
Psmc6	ATGAGAAACCCACCTCATGA
Psme1	GAACTGCAATGAGAAGATTG
Psme1	GTACCAGGAGATCCGTCTGA
Psme1	TGGGCCTCACCTACCACGTG
Psme1	AGGTATCTGTAGCTGCAACC
Psme2	ACTCACTACATGGGTGTCCT
Psme2	CAGCTGCTCTCACTTGGAAA
Psme2	CTCCTTCCCAGATGGATTAC
Psme2	TCCTCCACCCAAGGATGACG
Ptgdr	GCAACTCACAATTAAAGGCA
Ptgdr	TGGCTATGGCGGTGGAGTGC
Ptgdr	ACGAGCACATAAAAGACCGA
Ptgdr	GGCACCCAGGTTGCACACCA
Ptger2	TGATGAGGCAGGTTCCCAGC
Ptger2	GTAGAAGTAAGGGTACCCGA
Ptger2	AGCGAAGAGCATGAGCATCG
Ptger2	AGTACGTCCAGTACTGTCCT
Ptgr2	TGGAGGTGACATCAGCAACG
Ptgr2	TGTAAGATGAACGAGGACAC
Ptgr2	ACTGAGAAATCTGACCACAC
Ptgr2	GCACTGACTACTTGGCACCG
Ptpn21	AGCACGCCGAAGTAGACGGT
Ptpn21	GTACGTGTGGCGGCTGTGTG
Ptpn21	GCAGCGGTTAGAGCAAGGCA
Ptpn21	AATGAGCACTCTGTACACAA
Pygl	GAAGATCCGAGAGGGATGGC
Pygl	GCAGCCCACGATGCAGAGGT
Pygl	GATCTGCTCCGATAGGTCTG
Pygl	CGTGGCAGCCCACGATGCAG
Rab15	GAAGAGCAGAAACGGCAGGT
Rab15	GTTCCGGCTACTGCTGATCG
Rab15	CGAGGAGTGGAACTCGTTGT
Rab15	GCAGTACTATCGGCGAGCCC
Rab2b	GATCAGCATTATAACCATGT
Rab2b	GAAGAGATAAGCGTAAGTCA
Rab2b	GCTTGTCGGTAAACTGAAGG
Rab2b	GGGATAGCTTACCTATTGTG
Rabggta	GAACCGGCCCAGCCATGTCT
Rabggta	AGAAAAGCAGACTGACAGAC
Rabggta	AATCCCGGGATACCCAGACA
Rabggta	AGGCAGCACAGAACATCGTG
Rad51b	TTGGATGAAGCATTGCACGG
Rad51b	GCCTTGGATGAAGCATTGCA
Rad51b	AGTCTGCATTTACTGCTGAG
Rad51b	CAGCCTGGGAGGATTAGAAG
Ralgapa1	GATTCTGCCAAAGTTCACAG
Ralgapa1	GTAAACCTTACAAACCACTG
Ralgapa1	GGTGCTGGACAATTGTCTGC
Ralgapa1	GCACACAGGAAACTCCTTAA
Rbm25	GAGTGGGTAAGGGATCAATG
Rbm25	AGAGCACGGAGGGTAGATTC
Rbm25	GAGCTGATGGGTCTCAAAGT
Rbm25	CAAATTCAGAGATACACACA
Rcor1	AAGAATGGGAAGCAGAACAT
Rcor1	GGTGGGACCCCAGTACCAAG
Rcor1	GTCCAGCTGTCTCAGCACCG
Rcor1	AGTCAAGAACGAGACAATCT
Rd3l	AAGATGTAGACAATTTCCCA
Rd3l	GAAAGTGAAAAAGACAGGCG
Rd3l	AAGCTGGAACCGTTCTCAGC
Rd3l	AGAAAACGATGTACTTCCCT
Rdh11	GCAATGAGATAATAGCCAGG
Rdh11	GACGGCTTTGAGATGCACAT
Rdh11	CCGGCAAGCTAAATACACAC
Rdh11	GAAGGAGACAGCTAAAGATC
Rdh12	GAACTGGCTAAGCGGCTCCA
Rdh12	GCCCGGGTGAACCGCATAGG
Rdh12	CCATAGCAAACACAGCAGGT
Rdh12	GCCGCCATAGCAAACACAGC
Rec8	GCCCTGTGCTCACCAGATGG
Rec8	AGAGATAGAGGGAGAAGCGG
Rec8	AAGCTGGGCGGAGAGATAGA
Rec8	TAGCCTTACCCACAAGGTAC
Rem2	AGGGTGCTGTGCGTCAGATC
Rem2	GGATCACTGCCTTCAGACGG
Rem2	GAAAGGCATCCCCCGTCTGA
Rem2	GCCGCCAGGCCTCCCCACTG
Rgs6	GCAGTTGAAGCAATACACCT
Rgs6	TGTTACCTGTGACGACACTG
Rgs6	GATGCAAGATGACAAGACAG
Rgs6	CAGGTACTGACATTGTACAG
Rhoj	GATGAGAAACACATCTGTGT
Rhoj	GAACAGGATCCTGAAGTGCG
Rhoj	GATTGGAGCGCAGTGCTACT
Rhoj	TCTGTGTTGGGGTAAGAGAG
Rin3	GTAGGTGGTGGTCAGATAGT
Rin3	AAATAGGATTCACAAACCAC
Rin3	GCTGGTGGTCACACCCAGGT
Rin3	GCACGTACATGAGCACAGGC
Ripk3	CAGCTTTGGGATCCTCGTGT
Ripk3	GGATCCAGCAGAATGTTAGA
Ripk3	CAGCCAGCACTGCCCACACG
Ripk3	GGCCAGGGCCGAGGGCACTC
Rnase1	TGCCAAGGGCTCATGCACGA
Rnase1	AAACAATGGAAACAGAATGA
Rnase1	GCAACCAAATGATGAAACGC
Rnase1	CAAAGTGGACTGGTACGTAG
Rnase10	GTTGACTGTGACCTCAAGGG
Rnase10	CAGGGACTGTAATACCATGA
Rnase10	AGTGACAGTTGGGAGTGACT
Rnase10	GCAAATGTTACAAAAGTCCC
Rnase11	GAATTCCCAAGGCCACCCGA
Rnase11	TGTTTGTTCACACTTCCCTC
Rnase11	GCCTGCAAGGACCTTGCACG
Rnase11	TGAGGTGATGCTGTGCTCAT
Rnase12	GAAATTTGGTACCTGCAGGC
Rnase12	ATGTAGTTGCAGTACCTCAG
Rnase12	GTACCTGCAGGCAGGATATG
Rnase12	GCACCACATATCCTGCCTGC
Rnase13	GGGGAAGGAGTTCTGAGTGA
Rnase13	CGGATACTGTAATGGCCTCA
Rnase13	TGCCTCTCACGTAGGCCATG
Rnase13	ACAGCACCCTGACCAACCAA
Rnase4	GTTCTTGCACAGGATATTGG
Rnase4	GCCGTTCTTGCACAGGATAT
Rnase4	GGCCAGATGAACTGTCACGA
Rnase4	CATGCTGTCGAAGGAACCGT
Rnase6	AGGGTCTCTCCAGGGCACAC
Rnase6	TGAGAGCAAAGTAGATACAT
Rnase6	GGCCTGTGAACACCCAAAGA
Rnase6	CCATGCAACACAGCCATGCG
Rnase9	AGAAGCATGAATCTAATCGA
Rnase9	TGAATCTAATCGAGGGAGTG
Rnase9	GAGCTAGTAAAAGCCTGTGA
Rnase9	AAGAAGCATGAATCTAATCG
Rnf31	AGGGTGGCCGGGATGTACTA
Rnf31	GAAACAGGGCATATGCATCG
Rnf31	GGAGTGTGTAGACGGCCAGA
Rnf31	TGCCTGGGGCAGAACCACAG
Rpgrip1	GCTGAGTGAAGAGAGCAAGA
Rpgrip1	GACGTCGGGTAAGAATGTAA
Rpgrip1	GTAAGGGCCCAGCCGCACTT
Rpgrip1	AAGAGGCAGCAAGGGCACCT
Rpl10l	ACGGTGGCGAGAGTCCACAT
Rpl10l	CGGGAAACCACAAGGTACGG
Rpl10l	GACACCATGTGGCCGCAGAG
Rpl10l	AGATGCGGATCTTCGCATCG
Rpl36al	CCACAAAGAAGATTGTGCTC
Rpl36al	AAAGTGACCCAGTATAAGAA
Rpl36al	ATCGTAGCGCCGCTTTCCTT
Rpl36al	CGCTACGATCGCAAGCAGAG
Rps29	GAAGGACATAGGCTTCATTA
Rps29	ATTTGCGGATCAGACCGTGG
Rps29	ACCCGCTCCTCACCAAGAGC
Rps29	ACGGTCTGATCCGCAAATAC
Rps6ka5	GTAGTGGAGGGTGAAGCACG
Rps6ka5	AGAGCTCCGGTGCTGCGTAG
Rps6ka5	ACGATGAGTCCTGTGACCTG
Rps6ka5	GCTCCAGATATTGTCAGAGG
Rps6kl1	TGACTGAAGCCTGTGACTGG
Rps6kl1	GTAGCACGTCCACACCATTC
Rps6kl1	GCCATAGCTCCACCAGTCAC
Rps6kl1	GGTGTGGACGTGCTACTCCG
Rtl1	GACCCCAAAGAACTCACACA
Rtl1	GTTGAAGCCCAAGATTTCAG
Rtl1	GGGCCCGCACTGCGACACTG
Rtl1	AGGGAGAGTGGAAGGTACAC
Rtn1	GTAGATGCGGAAGCTGATGG
Rtn1	GCACTCTGAAGGAGCTACGG
Rtn1	GCACAAGTTGACCAATATCT
Rtn1	AGAGCGCGCCAACGTAGGTC
Sall2	AGTTCCTTGGAGAAACCCGG
Sall2	GCCGGTGAAAATGTACTTTG
Sall2	TCAGAAGGCGAAGCCCCCAA
Sall2	GGTGAGCGAGGAATTCGGTC
Samd15	GAAGGTTGGAGCAGTTTACG
Samd15	GCAGAGTGGATTAGTGATCT
Samd15	GCCAACCAGGACACGCAAGG
Samd15	TGTCTTGCAGGAACTCTATG
Samd4	TGATTACAGAATGTTACCAA
Samd4	GATTGTGGCAGGGACAGACG
Samd4	AGTATGCACGGGCAGCGAGC
Samd4	GCCACATGGCTAGTGCGCTG
Sav1	TGTGCTCACTTACTTCACAG
Sav1	GGACCGTGCCGAATGAATGA
Sav1	GTTGTACGAGGCCTACAGAC
Sav1	AGAATTTGGAACCTATTACG
Scfd1	GCAGAGGAGAGATGATATCT
Scfd1	GATGGTGGGAAGCAAGATGG
Scfd1	CCGATGCTCAAGAGGAACGG
Scfd1	TGTGAAGGAACTGAGAGACA
Sdr39u1	TGGCCCGGGTCGAATCACGT
Sdr39u1	GATGGCTTTGGCTAGCAAGT
Sdr39u1	GGTCACCAATGTGTATCCAG
Sdr39u1	GCAAGTGGGTAGTATCCAAG
Sec23a	AAAATTAGACTATAGCACAG
Sec23a	GTGGTCCTACTGCACAGGAC
Sec23a	GCCACTCCTGAGGAACGCAG
Sec23a	TACATTGACACGGAGCATGG
Sel1l	GATGCACGCCAGCGGCACAG
Sel1l	AGTCCTCCAGAGTTGTGAGT
Sel1l	GCTGGCTGAGCAGGGCTACG
Sel1l	GATGTTTGAGAAACTGACTG
Serpina10	AAGATCTCCATGAGGCACGA
Serpina10	GGGGAACAGAAGCAGTGTCA
Serpina10	AGAAAATGGACTCAACCTAC
Serpina10	GCCCAGAAATAGGAGCATCC
Serpina11	GCTGCTGGAGAGGCTCACAG
Serpina11	GTCCTCCAGATCGAGTACAG
Serpina11	GTTGCGGAAATTGAAAACCT
Serpina11	GAAGCAGACCTACGGGCAGG
Serpina12	ATTGTCAGGAAGGACAAATG
Serpina12	GTACCCATGATGTTCCAAAG
Serpina12	GTAGACGAGATGCGGAGCTT
Serpina12	GATGAGATGAGATCCGGGTG
Serpina1a	AGCAGTTACAGTCTTACAAA
Serpina1a	GCACATGAAGCATGCCCGAG
Serpina1a	CACATGAAGCATGCCCGAGA
Serpina1a	AATCAGCCTATACCGGGAGC
Serpina3a	AGGGAGGATAAACAGGAAGC
Serpina3a	GTTCCTGGGAAATTTCACAT
Serpina3a	GGAGATGCAAAGTACTGTGA
Serpina3a	TGTGCCCATGATGAAAACCG
Serpina5	GACCCCCAAAAGGACCACAC
Serpina5	GGGGAGAATAAATAGAGCGA
Serpina5	GCCTGGATGAGAGAACATTG
Serpina5	GATGGTGCACAAATCCATGA
Serpina6	GTTGAAGGCAAAGTCAACAT
Serpina6	GAATGAGACAAGCACAGTGA
Serpina6	GGTGCAGAGCCAGAAGAGAC
Serpina6	ATGATTGTTGATCTGTTCGC
Serpina9	AGGGAGGTAGAGATACTCAC
Serpina9	GTTGCTGGGAGACACCTGGG
Serpina9	AGAAAAGTCTGTCTGCCAGG
Serpina9	AGTTGAAGCCAAGAGTCCGG
Setd3	GATACGAGGAGAGTGACCTG
Setd3	TGTCAAAGAAAAAACCACTG
Setd3	GGAATGCAACGCAAAAACAC
Setd3	CGAGTATTCTGCATGACCGA
Sgpp1	GTACCTGGGCCAGTGCACCA
Sgpp1	TGCCTAAGTAGAATCTACAT
Sgpp1	GCTCACCTATGGCCGCTGGC
Sgpp1	GGAGAACCCAACCATCCCGT
Sipa1l1	TGAGCGGGGAGAATGTGTGT
Sipa1l1	TGAGGCTCGAAGCCTAGTGT
Sipa1l1	ACTGCTGGGAGATGGCACGT
Sipa1l1	GTAGGTTGTGTACAGAGAGT
Siva1	GTGGACTTTGAGTTGGAGCG
Siva1	ATGCACGATGAACAAGCGAT
Siva1	GCGAACGGGCAGCTCCGCTT
Siva1	GCAGTGTGTATACACCTGCT
Six1	GCTGAAAGCGCACTACGTGG
Six1	GTTCTTGTGCAGGTGATCGC
Six1	GGGTGCCGTGGGCAAATATC
Six1	GTGGAGGCCGAGAAACTTCG
Six4	GTACAAGGCGCGCTACACCG
Six4	GGGCAGGGACCAAAGAAACC
Six4	CAGCCCTGGGAATGACACAG
Six4	GAAGCTGCTACTGAGACAGG
Six6	GCCATCGTGGCTTTCCACGG
Six6	GAAGGTACCACTCTCGAAGC
Six6	AACCGGACTGACCCCCACAC
Six6	AGCGGCGACGTGGAGCGCCT
Slc10a1	GATGGCCAGAGCCTCAATGC
Slc10a1	AGGAGAGGAAAGAAGAACAG
Slc10a1	GCTCTCGCTTGGCTGCACCA
Slc10a1	TGCCCAGAAGGAAAGCACTG
Slc22a17	TGTTTCTGGAGTCTGCACGG
Slc22a17	GCAGCGGGACATGGTCACAG
Slc22a17	AGAGAAGCAGGATGCCCCGA
Slc22a17	TCAGCAGCACAATCCCACGA
Slc24a4	GAACACGGCAATCCACAGAG
Slc24a4	TATACGATGAGGAAATTGTG
Slc24a4	GCCGGAGGCACAGCACACCA
Slc24a4	GTCGGTGTAGGAACGATTGT
Slc25a21	AGATGATCTTCCGAACAGAG
Slc25a21	GATATATGTCACTATCACCA
Slc25a21	TGTATGAATACACCTATGCA
Slc25a21	GTTGCAAAGAGTCGGATCCA
Slc25a29	GGTGTGGCAGGTGTGATCGT
Slc25a29	TCGTCTTGGCCAGTTCCATG
Slc25a29	GGTGCAAGGTAACACCCTCC
Slc25a29	TGCCGCGCAGGCCCTCATGC
Slc25a47	GCAGGTCAGAATCCAGACGG
Slc25a47	TGTACCTTCACTGTATCCAG
Slc25a47	CAGACGGAGGCCAAATACGC
Slc25a47	GGACACGTATCGTCAAGAGC
Slc35f4	GGAGGACCAGTGCTCCACTT
Slc35f4	GATGGCCGGAATAATAGACT
Slc35f4	GGGATGGCGGGACTATGGCT
Slc35f4	ATAGTCCCGCCATCCCACAG
Slc38a6	AGAAAGGAAAAAGCCATGGT
Slc38a6	ACAGTATATGGGCAATACTG
Slc38a6	GTTTAAGATAAAATAACCCT
Slc38a6	TACAGGGAAGTGGATTAGAG
Slc39a2	AGCGACACAGAGCTGTATGG
Slc39a2	GTACAGGAAGAGGAATGGGG
Slc39a2	GACATATAAAAACGTGCCAG
Slc39a2	GAACACGGAATGAAAGGACA
Slc39a9	GATGAGGCAACCCAGAACCA
Slc39a9	AGCATGGACGACTAGCCCCA
Slc39a9	GAAAACGAAGCCCAATACAA
Slc39a9	GAAAAGCATGGCCACTCCAG
Slc7a7	GACATAGGCACAGTTAATGA
Slc7a7	GACCAGTGAGAGGCCAAAAG
Slc7a7	TGGGCTCAACGCCTCCATCG
Slc7a7	CAGGGTTCCCCACTTGACAT
Slc7a8	GGAGGAATGCCAGAGCAACG
Slc7a8	GTGTCACTTACACAAACAGA
Slc7a8	AGTGAGTCAGAAGATGTGTG
Slc7a8	GATGAGTGTGTACATGTCAC
Slc8a3	GATCATATAGAGCCAAATGT
Slc8a3	GTAGCAGTAGGCCTCCAGCG
Slc8a3	GATGGTGCAGCCGAAGTGAG
Slc8a3	GCTCACAAAGAGCCATGTCG
Slirp	AAAGAGACTGGCTTTCACAG
Slirp	CAGAAAAATTCCTTGGACCG
Slirp	TGCGCTTAGCCCCTTTATGG
Slirp	TGGCAGCCTCCGCCATAAAG
Smoc1	TGGAGGAGCGAGTGGCACAC
Smoc1	GACGCACCAACAGTAGCCTG
Smoc1	CGAGGATGGTTCCTTCACAC
Smoc1	GGTGCGTCCTAGTAGACACA
Snapc1	GCTGTGCCAGCCGAAACAAA
Snapc1	CACACGTTCCAGATCAGAGT
Snapc1	GCTTGGGCATAGCTGTGAAG
Snapc1	ACAAAGCGCCAACTCTGATC
Snw1	GAAGAAGCCAAACAGCACGG
Snw1	GATCCCATTAGATAAACGGC
Snw1	AGCCCAGGTAGAGAGAAAGA
Snw1	GCATGACCGGAACCTTTCCA
Snx6	GATGCGCTGCAACCCGACAC
Snx6	GCTCCTTCAGAACTGCCTTG
Snx6	GCATGAGGTGTTCCTGTGTC
Snx6	GACAACATGAGGAATTTATC
Socs4	TGTAATTGTACGACTTACGA
Socs4	AGAAACTGCAAGATGCGGTG
Socs4	GCAGTGGACGTAGTCGATCT
Socs4	GTAGTGGCCGACACTCTCCA
Sos2	AATAATGATGCTCAACCCAG
Sos2	AGAAGAAAGACAGTATCTAC
Sos2	TGGTTCCCGTGTATCACTGT
Sos2	GCGATAGTGCAGGGAAATGA
Spata7	GAAAAATAAACATCATTTGG
Spata7	CATGGGCTGAAGGTTGACTT
Spata7	TGACTTAGGCTGCATATCTG
Spata7	ACGGATGAAATCTTGAAACT
Sptb	GATGAGAGCCAACAATCAGA
Sptb	GCAGAAGCACAAGCTAATGG
Sptb	AATCCAAGTGAGCAGGTCTG
Sptb	GTGATAAAACGCCACCACGT
Sptlc2	GCTTCAGGAGGATACATCGG
Sptlc2	GAGCATCAAAGGCACCACCG
Sptlc2	GCTCCAGGCACACTACAGAT
Sptlc2	TGAGAGCAATCACTTCAGGA
Sptssa	AGAATAGCCATGATGTGCTG
Sptssa	GTGGGGATGGCCCTGTACAC
Sptssa	GGTCACTGCGCTCTACATGC
Sptssa	GCAGAATAGCCATGATGTGC
Srp54a	TGGTTGCTTACTGAAAACCT
Srp54a	TGTATCTGCACATATCAAAC
Srp54a	GATGGATGCATCCATCGGAC
Srp54a	TATGTGATGGATGCATCCAT
Srsf5	GTAGCCGATCCCGTTCACGA
Srsf5	AGAAAAATCAAATTAATTGA
Srsf5	ATCCTCAAGAGTCAGCTGGC
Srsf5	GCAGACCTCGAAATGATAGA
Sstr1	CAATGATGAGCACATAACAC
Sstr1	GAAGAGTCGAGCCTACAGCG
Sstr1	GAAGCCCACCAACCAGCGCT
Sstr1	GGGCCAGTGGCGCAACAGCG
Ston2	GGTGGCAAAAGAAACAGTGT
Ston2	GATGAGCTGCAGGTCTGTGT
Ston2	GAAAGCCAAAGTGAACCGGG
Ston2	GCAGGGCATGGTCAATGTGA
Strn3	GATGGAGCGGGCGCACTGGG
Strn3	GTTGAAAGACGTAACCATAT
Strn3	TGGGCCCTAAATGTGTAGAT
Strn3	CGCAACAGTACACGATCCCG
Stxbp6	GAAGCTGCTCAAGCATCCAT
Stxbp6	AGGCCGTGCTAGCAACCCAC
Stxbp6	AAGCTGCTCAAGCATCCATT
Stxbp6	GACAAACAAAAAACCCACAC
Styx	GGAATGCAGGTATCTCTAGA
Styx	AGACGTTTGGGATGAAATAC
Styx	AGGAGTTCATTACCTGAAGT
Styx	AGTTCATTACCTGAAGTTGG
Supt16	AGAGATTGTACAGTAACTGG
Supt16	GGTGTGGCAATGCCAAACAC
Supt16	GAGATTGTACAGTAACTGGC
Supt16	TGTGACCTAAAGTACACAGA
Syndig1l	GAACCCCGTAGGACACAGTG
Syndig1l	TGTGGGGGCCGGTCTCTATG
Syndig1l	GAAGAGAGCTCGGCGAGAGG
Syndig1l	AGTCCCAAGTGGTCCCTGGG
Syne2	GGAGCAACAGAAAACCTACG
Syne2	GGTTTGAATCAACAACATGT
Syne2	TGCGAGCCAACCAGGTACGA
Syne2	TCAGAATCGAGGAGACCTGG
Syne3	TGGACTTGTACAGCATCCAC
Syne3	GAAGCTGATGGAGTCTTGGC
Syne3	GCACTGGAGTGAGTACCTGC
Syne3	GCTGCAGCTATGGATCACCA
Synj2bp	GGAGGGTGATAAGATCCTCT
Synj2bp	GCAGTCAGATATGAACGGAC
Synj2bp	TGGGCTTCAACATCGTCGGT
Synj2bp	GAAGAGATCAACCTGACGAG
Syt16	ATGAAGCGTAAAGAGATGAT
Syt16	TGACCCGGGAGAGAATGATG
Syt16	AGGGCCAGCAGACCTGCCGG
Syt16	GCCAAGAGTTGACACCACTT
Tbpl2	AGCGAGAAAGTATGCTCGTG
Tbpl2	ATACCTACTGAACTGCCGAT
Tbpl2	AAACACAGAATATAACCCAA
Tbpl2	GTGATGTGAAATTTCCCATC
Tc2n	TGAAAGAGAACACTCTCCAA
Tc2n	GCCAAGCAGAACTTGAACTG
Tc2n	GTTCTAGTAAAGCCTCAAGT
Tc2n	GATTCAGCTGCAAATTCTTG
Tcl1	GCTTCTCCCAGATCCACAGG
Tcl1	GCAGATCCTGTACCATATCA
Tcl1	GTACAGGATCTGCCAATACA
Tcl1	TGGATGAGTTTCGTCGAAGC
Tcl1b1	AGAGTCCAGGAACATATACT
Tcl1b1	GTAGAAAGTCGTAATTCAAG
Tcl1b1	GGGCAACAGATGGGACTCAC
Tcl1b1	AGTGTGGATAGTTGCAAATG
Tcl1b5	AGTGTGGATAGCTGTAAACG
Tcl1b5	GTTCATCCTCATAGATGCCC
Tcl1b5	CTGTGTCTGTTGATCCCCAG
Tcl1b5	CTCCTGGTCTCTGTTAGCCT
Tdp1	AGGTGTGGATGACAACTCGG
Tdp1	GTCCAGGGGTTGAACCAATG
Tdp1	GTAGGAGCGTATCATCAGCT
[truncated: 285 more rows]

## Sheet: Chr15q gRNAs
Mouse Homolog	gRNA Sequences
1700017B05Rik	GAGGCCTTGTGACCCCAAGT				Total gRNAs	1976
1700017B05Rik	GGGATCCTGCCACACCAGTG
1700017B05Rik	GGAACAAAGAGATCATTGGA
1700017B05Rik	GTGGAGAGTCCGTAACACAA
2300009A05Rik	GGGCCCACGAGGCTACGCTG
2300009A05Rik	AGGGGAAGCAGCCGGTGCGC
2300009A05Rik	GGTGAAGAAGCGGTCCTGCG
2300009A05Rik	GTGCTGCGTCAGCACCTCCG
2610034B18Rik	GAAAATGAGCCGCATCTACC
2610034B18Rik	AGGTCATGGAACTCGAACTG
2610034B18Rik	GAATGCCACCGCCTGGTCTG
2610034B18Rik	TGTATCTCGGCACAGCATCT
3110040N11Rik	TGAGGTCCAAGACCTTGGAG
3110040N11Rik	GTCCGAGGGAGAGGCAAATG
3110040N11Rik	GATCTGAGCACTGAGGCCGT
3110040N11Rik	GAACCACGTCACTCTTCCTG
AA467197	TGCGTTGAAAAAAACCGACG
AA467197	CGTTAGTACTTACACCACGT
AA467197	GGAGCTGCAAAAAGTCCGGA
AA467197	ACGCTTATAAAAAACGCCAA
Aagab	GGGGACCGAGATGAGATCGA
Aagab	GCAGCTGGTAACCAGCGCGC
Aagab	GAATATCCAGGTCTAACATG
Aagab	TCTCTGCTGATGCAACTCTG
Abhd17c	GGTGCGCAGTGCCTGCCACG
Abhd17c	GTACCGTGAATGACCAACAC
Abhd17c	ACGCAAACCAGACATCAGTG
Abhd17c	CAGTGGGGAATGGAGGATGA
Abhd2	GCCAGGGGTACAGCGCACTG
Abhd2	GGTGGTTTAGCACTGCGCAC
Abhd2	AGATTGATGACAATGTGATG
Abhd2	GAAGCCCACGACGACCAGCT
Acan	TGCCGTGCATCACTTCACAG
Acan	GCAGGCCTGCATGCACACCG
Acan	AGACAGTCCTTACACCCAGG
Acan	AGATGGGGTAGCGCACGCTG
Acsbg1	GATCATGGAAAGGATCCAGG
Acsbg1	GCAGCCGGGTACCACCCTGC
Acsbg1	TGAGGCCATAGCCTGCATAC
Acsbg1	GACCCTGGTAAACACACTGC
Actc1	GCCATTGTCACACACCAAAG
Actc1	GCATACGATCGGCAATACCA
Actc1	AGAGTGTTACCTGGTGACGT
Actc1	GGTCCCGACCAGCTAGATCC
Adal	AGGCAACACCAGATACCCCT
Adal	TTACAGTTGGATCTCCACTG
Adal	GTTCTTGGCCTTGACCTCAG
Adal	CAGATCCCACACCTGAAATG
Adam10	GTAATATGAGAGACTTTGGG
Adam10	GCAAAGGAAGGGATATGCAA
Adam10	GAACACCATCATCAAAATCC
Adam10	AAGAAGAAGTCATTGAACAC
Adamts17	TGGCAGAATGAGGAGTATGG
Adamts17	GAAGGGGCTTCAGTCAAGAG
Adamts17	GATGAACCTTGCGACACTGT
Adamts17	GCTGCAGGAATTGCTTACTT
Adamts7	GTGGAATGGAGACTACCGAG
Adamts7	GCAGCTCACTAGCCTCCAGA
Adamts7	GCAGCCGCGAGTACATCACC
Adamts7	GAACAGAGGCAAGTACTGTG
Adamtsl3	GAAGTGAGTGAAGCCCTGTG
Adamtsl3	TGAAAGTGCACAGTGACTTG
Adamtsl3	AGATGTATTGAGCAGCAAGT
Adamtsl3	GCACAGTGACTTGTGGCCGA
Adpgk	GGTGAACTGGAATACCAGTG
Adpgk	GAATGTGGTAGACCAGCGTG
Adpgk	GGTGTGTGCACATGGCGCTG
Adpgk	TGTGTGGATGTGGTAATCTC
Aen	AGCCATGGAGTTGTACCAGC
Aen	GCGGGTGCGATAGTCCACAA
Aen	GCTCGCTCACCCGTCCTTGG
Aen	GGCGGGTGATGCCACTCCAG
Agbl1	TTTGGCAGAGAACATCATGT
Agbl1	GTAGCTGACATCCTCCAAGA
Agbl1	AGCCTCTATTCACTGCCCTG
Agbl1	GACAGTGTTACCCTGCGAGT
Akap13	GTTACAAGTAAAATGCACTC
Akap13	GTATCCTTTGGAATAAAACT
Akap13	GGTACTTGTGCAGTGATAGA
Akap13	TGGAGCCGTGGACAGCAAAG
Aldh1a2	AGGGAGTCATCAAAACCCTG
Aldh1a2	GAAGTGTGGAAAGGGCCAAG
Aldh1a2	AAAACCCTGAGGTATTATGC
Aldh1a2	GCTCAGTTGTGGGATCAAAG
Aldh1a3	AGGGTCACACTGGAGCTAGG
Aldh1a3	AGCCTTCACCGGCTCCACAG
Aldh1a3	AGGGCTGTTCATCAAACCCA
Aldh1a3	GCCGTCGAGTGTGCTCACCA
Alpk3	AGATTGCTACCAAACTTCGA
Alpk3	TGTACAGCTGCAGGGTGTGA
Alpk3	ACCCTTAGCAAACACCATGG
Alpk3	CGATACACACCACAGTCCGT
Ankrd34c	GAAGGAGCAATCAAGCCCCA
Ankrd34c	GACATTGAGATACTGCTTGG
Ankrd34c	CAGGCCTCGTGTGAGCAATG
Ankrd34c	TCAGAAGGAGTTGTACACAG
Ankrd63	AGGCCAGGCTGAGTGCAGTG
Ankrd63	GGGGACGCGCACCTTCCTTG
Ankrd63	AGAACTCCAGCACCGCCCCG
Ankrd63	ATGAGGACTAAGGCCGACCG
Anp32a	GTAAGTTGGAAATGGAGGTG
Anp32a	GATAACTGTAAGTCAATTGA
Anp32a	GCCATCGAGGTACATGACCT
Anp32a	TTCCTAAGTACAATCAACGT
Anpep	AGAGCGTACTGAGTACCTGG
Anpep	GATGTAGGCCAGCAGGTATG
Anpep	AGCACCCAGATATTCCACGT
Anpep	TGGGGCCGTAGACCTCCGAG
Anxa2	TGAGCAGATGATCTCAATGA
Anxa2	GGAACTAAAAGCTTCCATGA
Anxa2	GCTGGAGAGCATCAAGAAAG
Anxa2	GTCCCTGTACTACTACATCC
Ap3b2	GATATGCAGAGACACCATGT
Ap3b2	TGTGGCCTGTAAGAACATAG
Ap3b2	GGAATTCCCGGAGAACAGTG
Ap3b2	GGAGGCCATGAAGAGGATTG
Ap3s2	GGGCTGCACTCACAAAACGC
Ap3s2	TGGTAGAAGCGGACCAGCCG
Ap3s2	TCAACAACCATGGAAAACCG
Ap3s2	TGGGATCTTGGACCTCATCC
Ap4e1	GATGTGCTGTACTTGATTGG
Ap4e1	GTCCAGAGGAGGTTATAACC
Ap4e1	CCTAAGGTATATGTGCAAAG
Ap4e1	ATGCTGACGCGGTAGCTCTG
Apba2	TGGACGCTTGATGAGGACGG
Apba2	GGGCCTGAAGAACCAAACCC
Apba2	GCCATGTTTAGGCTCCTCAC
Apba2	GGTCTTAAACGCTGACACGC
Aph1b	ATGAGCAGGTAATTCTGTAC
Aph1b	ATGAGGAAGATGACTCGCAA
Aph1b	ATGACGGCTGCGGTGTTCTT
Aph1b	ACCAAAAAACGGATGACAGC
Aqp9	AGATGGCAAAGACAATCAGA
Aqp9	GCTGAGCTCCCACATAAAAG
Aqp9	GTCCTCAGTCGAGAAAAGGC
Aqp9	GATTTGGAAATAACTTCTGG
Aqr	GAATGTCAGAGACCACATCA
Aqr	TGAGCTGGAAGTCATACAGC
Aqr	CTGATATAAGAAGAAATAGC
Aqr	GATTCAGCCGATTGAAACGG
Arhgap11a	AGCAGGCCTGCAACATCACA
Arhgap11a	AGGGTAGAGTCAGGAAAAGC
Arhgap11a	AGAAAAGATCAGCAAATCTG
Arhgap11a	CGGGATGTGGGATCAGAGAC
Arid3b	GGGGAGTAGAGCCCGCAATG
Arid3b	GAACTACAGGCAGCCATCGA
Arid3b	GATGGGAATCCGGTTGATTG
Arid3b	GCTGTTTGCCCAGAAACCAG
Arih1	AGATCTAGAAAATGCCACAG
Arih1	GATACTGTGAGAGTCGACGA
Arih1	GACATAAGTGTACATGAGTG
Arih1	TTGGATTGCAGCTAACACAA
Arnt2	GCTGACCATCCTGCGCATGG
Arnt2	AGGCAGTAAATATTGCCTCG
Arnt2	GGAGCCTCCCAATTGCCACG
Arnt2	TGTGCGAGACCGCCATGCGC
Arpp19	AAGGCAAGGTATCCTCACTT
Arpp19	AGTGACCTCTGTCTTATCCG
Arpp19	TGCAGCCCCGGATAAGACAG
Arpp19	GTCCCTGGTTGCTAGCAAGC
Arrdc4	GATGATGCAGCAATCCAGGA
Arrdc4	GGATTGCTGCATCATCAGAG
Arrdc4	CAGTATTCAGTACTGTGTGA
Arrdc4	AATGTTCGAGGAAACCACAT
Asb7	CGAGTGTTTCTGGAACACGG
Asb7	GCAGAGCACGTCATCACGGA
Asb7	ACGGTTAAGGATTTAATCGG
Asb7	GAGGAGCAGACACAAACTTA
Atp10a	GCAAAGAAGAGTATGCCTGC
Atp10a	GATCAATGTATACACCAAGG
Atp10a	GGGTATTGAAACCAAAACCT
Atp10a	GAAGAAATACAGCACCATAT
Atp8b4	GGACACGAGTTACTGGACTG
Atp8b4	GGGAAGTGCGAGAAGAACTC
Atp8b4	AGGGGAAGGCCTCCGAACCT
Atp8b4	GTCGAAGATAAATTACAAGA
Aven	ATTCTGAAGCAACATTAAGC
Aven	TGTTGCTTCAGAATTGATCC
Aven	TGCCTCTGCCCAGAGACCTG
Aven	AGCAAATCGGAACTGTGAAA
B2m	GACAAGCACCAGAAAGACCA
B2m	ACTCTGGATAGCATACAGGC
B2m	AGTATACTCACGCCACCCAC
B2m	GAGCCCAAGACCGTCTACTG
Bahd1	AGGCCTGAGCACTTACAGGG
Bahd1	GCGACATGGAGAGACAATCC
Bahd1	CAGGCCTGTAATACCACAGG
Bahd1	GGCGGAAGTCATAGACATGG
Bbs4	AGAGCTTGAATGGAACCCAG
Bbs4	TAGGAGATCTGCCATAACCT
Bbs4	GAACTCTACATGCTCTTGGC
Bbs4	GGTAAGTGTAGCACACTCCC
Bcl2a1a	GAATGGATACGGCAGAATGG
Bcl2a1a	GGAGAATGGATACGGCAGAA
Bcl2a1a	GATACGGCAGAATGGAGGTT
Bcl2a1a	GTTTGTAAGCACATACATCC
Bcl2l10	GCCAGGCTGGAGGCTCTCGG
Bcl2l10	AGACTTCAGCTGGAGCCAAC
Bcl2l10	AAGGCCGCCTCGACAGACGT
Bcl2l10	GCCACCGCCCACGTCTGTCG
Blm	GATCAACCAGGACAACTGCC
Blm	GCATCACATAGGCAATTGGT
Blm	CAGGAGGGAATGTGACACAA
Blm	GCTTCTTGGCAGATGACTCG
Bloc1s6	TGTGGTTGTCAAGTTCACAG
Bloc1s6	AGAGCTGTAGAGCACTTGGT
Bloc1s6	TAGAGCTGTAGAGCACTTGG
Bloc1s6	CTTCCTTATAGTCACCAGCT
Bmf	AGAACCGAGACCGTGCGTGG
Bmf	GTATTGCAGACCAGTTCCAT
Bmf	CAGGGTGAAGAACACTCGGG
Bmf	GCCCTGGCATCACAACTCGG
Bnc1	GTACCTGTAACACATATCCA
Bnc1	TGAACAGTGCAGGCACGGAT
Bnc1	ACGCTTCAGGATTACATCCG
Bnc1	AGAGACACACGCGTGCACAG
Bnip2	AGTGTTCGGATAAACCAAGA
Bnip2	GCTACCAGCAAATTGATAGA
Bnip2	GGTATGCCGACATACTCCAT
Bnip2	AAGTGTTCGGATAAACCAAG
Btbd1	GGATTATCAAGTGAATATAC
Btbd1	TACCTGAGTAAGCAACATAA
Btbd1	ATATTCACTTGATAATCCGT
Btbd1	TGGGACTGCTAACACATTCA
Bub1b	AGTATCACAAACCTGAAGGG
Bub1b	AGAGCGATAGAAGCACTCCA
Bub1b	GGACAGATGGAACAGGACAG
Bub1b	AGCCCATGAAATATAGAACT
C2cd4a	GCCGAGGCTGGAACCTAGCA
C2cd4a	GGCGGACCGGGACACCTGGG
C2cd4a	AGCGCGGGTCCCAGTCTGTG
C2cd4a	GCCCCGGGAGAAACCCATCT
C2cd4b	GCGGCCCGGGGTGAGCACGT
C2cd4b	TCGCGTAGGTGTGCGCACGG
C2cd4b	GCGGCTCAACAGACCATCGG
C2cd4b	GGGATGCGCGGCCACAGGTC
Calml4	GAAGCAGGCATTGAACCAAA
Calml4	GAGAAGCTCACTCACAAGGA
Calml4	CATATGCATGATGGTCAGGA
Calml4	ACATCATGGCGTCTGAGCTG
Capn3	GAAGCCAATAGTGAAGAGGT
Capn3	GCTCCACCAATGATAAACCG
Capn3	TGGACGGTGTCTGTAAACGA
Capn3	AGTTTCACTGAAAACTACGC
Car12	TAGTCAGGGACCCTTCATAG
Car12	AAACTGTCCAGAGCACGGTA
Car12	GATGCCAAGAACGCCAGCCA
Car12	GTCGCTATGTAGGTCTATCG
Catsper2	AGTACTTCAGGATATCTGGA
Catsper2	TATTTCAACCATCAGCACAA
Catsper2	AATCCACAAATACTGCTCTG
Catsper2	GCTTGAGCCAAGCCGTACCA
Ccdc32	GAATCATGCAAGGGAGCCCA
Ccdc32	GCACCTTGGAACATTTCAAA
Ccdc32	AAAGTCTGGCCGGGATCTCT
Ccdc32	AAGAATCAAAGGTTTAAATG
Ccdc33	GGTAACACCGATACACCCAG
Ccdc33	AGATGCGCAGGTATTTAATG
Ccdc33	TGAACCGTGGCCCTACGTGG
Ccdc33	AGGGCGGAGGAAGAGAACCT
Ccnb2	AGAGCCATGTGACTATCCGG
Ccnb2	GCTCGCCTTAAGAAGTGAAG
Ccnb2	CTGCAGGAACCGGTCCATGA
Ccnb2	GCTCTGCAGTGACTACGTGA
Ccndbp1	GAAGTGCGTTGTCAGAACAG
Ccndbp1	GAAGAATGTGACCCGTACAG
Ccndbp1	CGCACAGTGAGGTGGCACAC
Ccndbp1	ACAGTGAGGTGGCACACAGG
Ccpg1	AGTCGAAGGAGACATTTCTG
Ccpg1	AGCTCAGATGACCTTAACAT
Ccpg1	GTGGGAGAGACTGTACGTTG
Ccpg1	GATGAGCTGGATGGTGTGAA
Cd276	GGAAAAGGAGCAGCGTAGGG
Cd276	TGTGTGTGCGCACAGCACTG
Cd276	AGGCTCTGTGGGTAACCGTG
Cd276	GCTGACAGACACCAAACAGC
Cdan1	GTTGGCTGACAACCAAGAGC
Cdan1	GCAGGAGAGTAAAGACACTC
Cdan1	TGGAGCGAGGACACGCTCGG
Cdan1	GAACTTATGCAACCAAACCG
Celf6	GACCCCGCGCACCTTTGTGG
Celf6	GCTACCGTGTAGTCCCTGGA
Celf6	TCGAGGAGTGCACTGTCCTG
Celf6	GTGCTGAAGGACCGGCTCAC
Cemip	GATAGTGATGGAGTGGACTG
Cemip	GTCATCAATCAGGATGTACC
Cemip	AGAGACTATCAAGTACACAT
Cemip	AGTCTCCAGAGTCACCCAGA
Cep152	TGTGCAGGAGTGTTACCTGG
Cep152	GGACTGAGCACAGCGTACAG
Cep152	AGGCCTTGGAAGAACTCCGC
Cep152	AAGATAGGCAAGTACAGTGA
Cers3	AGTAACCCCAGTAAACGTGG
Cers3	AGTCATTCCAAACCTCCCAG
Cers3	ATGGGCATATGACCTCTGGG
Cers3	CAGGGCCTCCACGTTTACTG
Cgnl1	TGTTATTCAGGACTATATAA
Cgnl1	GTTGATGTTACAGAACCGGG
Cgnl1	AGGAAGGCAGGAAAGCACGG
Cgnl1	GGAAATGCAGACACAACTGA
Chac1	GCCGTACCCGAAAATCCACA
Chac1	TCGGCAAGCAAGGATCTGTG
Chac1	CAGGGAGACACCTTCCATAG
Chac1	TGTCTCCCTGCCAGAACCGT
Chd2	GCTGGAGGGCCTCAACTGGC
Chd2	GAGCTTTGATCAGATAACAG
Chd2	AGCTTCAACAGCATACACAG
Chd2	GATCCTGACCAGGAATTACA
Chp1	GCAGCCGGGAAGATTTCCAG
Chp1	GATGGTTGGAGTGAATATCT
Chp1	TGAGCAGCTGGGCAGTATTG
Chp1	TAGGTACTGCGAATGATGGT
Chrm5	CGAGAACCCAGCGTCCCATG
Chrm5	GGAGACAGGGATATAGAAAG
Chrm5	GTTGCAGAGAGCGTAACAGA
Chrm5	GCAGTAGAGTATGGTCATGA
Chrna3	AGATCATGGAAACCAACCTG
Chrna3	AGTACACAGGAGAAGTGACT
Chrna3	GTAGCCCGGGGCTTTAATGA
Chrna3	GGATGAAGTAAACCAGATCA
Chrna5	AGAAACGAGAGCCCGATGCA
Chrna5	GTAGCGAATGCAATCGAGCG
Chrna5	AGAAATATCTTACGAACCCA
Chrna5	CGAAGGAGTAGGTGATGCAG
Chrna7	AGATGCATTCACCAAGACGT
Chrna7	GCACAAGCGGTCCACCACAC
Chrna7	GATGATGGTAAAAACCGAAA
Chrna7	TGAGCACACAAGGAATGAGC
Chrnb4	AATGAGGGGAATGTCAAGGG
Chrnb4	GAACAGCTCCTGCTATGAAG
Chrnb4	GCGACGTGATGAGCACACAA
Chrnb4	GTTGGAACGCACGATCACGT
Chst14	TGTTACGGTAAGCAGACAGG
Chst14	AGAGTACCAGCAGCGATATG
Chst14	GGTTGGCACAGGTGGTACAC
Chst14	GCAGACAGGAGGCGTTCCAA
Chsy1	GGAAATGTACACCACCCATG
Chsy1	GGTGTAAGGTGATCGCTCGG
Chsy1	GATTAGGGTCACAGACGACA
Chsy1	GTACGGGGCAGAGTACATTC
Cib1	CGGGAGAGGGCGAGGACACT
Cib1	CGAGATGACATGCTGGAACT
Cib1	TGTCCTCGCCCTCTCCCGTG
Cib1	CAGCTTGTGAATTGCCTCAC
Cib2	AGAGCAGCTGGACAACTACC
Cib2	ACAACACCTGAGAAAATCAG
Cib2	GTGTGACAAAGTCATTGAAG
Cib2	GCTCATGGGTACATGGACGA
Cilp	GATGGCAGCAATCAAGACTT
Cilp	TTGGTGCATACCCAGCACGG
Cilp	AGGCACCAGAAGCCCTCACG
Cilp	AGGGAAGGAGATACCTGTGC
Ckmt1	GAATGAGGAGGACCACACAC
Ckmt1	TGGAGATGAGGAGACCTATG
Ckmt1	CGGGCGGAGCAGAATCCCGG
Ckmt1	TGATCTAGTGTCCAACCAGT
Clk3	AGAGCTGGTAGGCCATGTGC
Clk3	AAGGGCATGACAGAGCTGGT
Clk3	GAAGAACACCAGCATCCGAG
Clk3	TGTGCCGGACATGTGGTAGG
Cln6	ATAGTAGTACAACAGCTCAA
Cln6	GGAGCCAGCATCCACCTGGT
Cln6	TGAGCGCGAAGGAATACAAG
Cln6	CGGTCACTCACCACATGCAG
Clpx	CGAAGTGGTGAGAAGCCGGG
Clpx	TGAGGAATAACAGCATTCCG
Clpx	GTTTGTGGGACGGTTGCCTG
Clpx	AGACCGGTTACTCCGCCATG
Commd4	CAGCAGTCGCAGCTTCACAG
Commd4	GTCTACCCGCCAGCCCACGC
Commd4	GAAACTCAGCACCGCGACCG
Commd4	TGTAGCTGCAGATGTACCAT
Cops2	GGAATATGTATTCTTGTGTA
Cops2	TGATGACACCCATGATTAGT
Cops2	GCTGGTTGACTTGATCAATT
Cops2	TTATTGTTTACAGAATGCGG
Coro2b	GGACATGCAGAGGATCACGT
Coro2b	GAAGCGGCTCCTCACGACAG
Coro2b	GCTGAAGCGGAACATGACCG
Coro2b	GCCATAGTCACTGAGAGCGC
Cox5a	GATGCCTGGGAATTGCGTAA
Cox5a	TGAGGAGTTTGATGCTCGCT
Cox5a	GGCTGCGGTACAGCGACGGA
Cox5a	ATTACCTTTACGCAATTCCC
Cpeb1	GATGGCCAGGAGCTTCTGTG
Cpeb1	AGAGAGAGGCTAGACTCCAC
Cpeb1	GCAGAGGAGGGGAAATGCGA
Cpeb1	GATAAGCACAAGTACCCCAT
Cplx3	GGAGTATCAGAAGCAACTGG
Cplx3	GGAGCTAGCCAAGATGATCG
Cplx3	GCTAGCCAAGATGATCGAGG
Cplx3	AGACAAATACCGTCTGCCCA
Crabp1	AGTGGACGGACGCAAATGCA
Crabp1	GAACGCCATGCTGAGGAAGG
Crabp1	GACATTTGGCGCCGATGATG
Crabp1	GAATTTCGACGAGCTCCTCA
Crtc3	CGTTGGGTAAGGATCCCCCG
Crtc3	GCTACCAAAGAGGTGGTCGC
Crtc3	CAGCTGCCATGACTCACCTG
Crtc3	GCCTGGCCTGCCCCATACAT
Csk	GTGATGCTGGGGGATTACCG
Csk	TGGTGGGTAAAGAAGCCGCT
Csk	TGGGTAAGGCACTCGCCCGA
Csk	GAGGCGAGTGCAGAGTCCAT
Csnk1g1	GTTAATGATAGCCATCCAGT
Csnk1g1	AGGCTTCCAAATCATCTCGC
Csnk1g1	GTCCAAAGTAATAAACCTGT
Csnk1g1	CCTGTACTGAACCCCCATGG
Cspg4	GTACAGAGGGCACCCCACAA
Cspg4	GGCATTAGCTAGCAGAACAA
Cspg4	AGGCTCCAGGGCGAGAGTGC
Cspg4	TGAGGACAGTAGGAGACCGA
Ctdspl2	ACGAATGTCTCAGATGTATG
Ctdspl2	TGTACAAGGAAACTATATAA
Ctdspl2	TGTAAGGGGTGGGATATCCC
Ctdspl2	AAGCACACCAGAGTTCTCCC
Ctsh	GAACGTGGGAAGAACATGTG
Ctsh	GGTACTTCCTCATTGAACGT
Ctsh	CTGGACTTTCTCTACCACGG
Ctsh	GCATCAAAAGACGTACAGCT
Ctxn2	GAAGAGGGCATGCTACTATA
Ctxn2	CTGTCTCTGGAGCAAAAGAC
Ctxn2	ATGATGAGTAGCACCTACTG
Ctxn2	AAGAGGGCATGCTACTATAT
Cyfip1	GATGACGAGAACCTGCGTGC
Cyfip1	TGTGGGACCCTCCAGCACGC
Cyfip1	GCAGTGGAGCGCTCACGTGA
Cyfip1	TTTGCCCAGGGTGATCAAGT
Cyp11a1	GTATTATCAGAGGCCCATTG
Cyp11a1	ACTGGTGATAGGCCACCCAG
Cyp11a1	TGAGATGGCACACAACTTGA
Cyp11a1	AGAGTATCGACGCATCCTTG
Cyp19a1	TGAACATCGGAAGAATGCAC
Cyp19a1	GAAGTACAGAGTGACCGACA
Cyp19a1	GAACGTGAATCAGTGCATAC
Cyp19a1	AAGCGTGGGCTGCAGTGCAT
Cyp1a1	GCACTTGGAAGTGTTCACAG
Cyp1a1	TGTCCTGACAATGCTCAATG
Cyp1a1	GTACCTGGTAACCAACCCTA
Cyp1a1	AGGGGACGAAGGATGAATGC
Cyp1a2	GCTGTATCTACATAAACCAG
Cyp1a2	CGTGCAGAGGAAGATCCATG
Cyp1a2	GGGAAAGCGCCGGTGCATTG
Cyp1a2	GCAGCAGGATGGCTAAGAAG
Dapk2	TGGGACTGGAGGCCGACATG
Dapk2	AGTGCCGGGAGAAGAGCACG
Dapk2	GAAACGGCTTACCATCCAAG
Dapk2	GGCCACCACTTACCACATGT
Dennd4a	TGAATGGACATGGTGCACTG
Dennd4a	TGAGGCTCCGGTTAACACAA
Dennd4a	GTGGGCACAGAGGGACATAC
Dennd4a	GGACGTCTGCGAGGGCCAGT
Det1	CAAGTATGGAGGGCACACGG
Det1	GGTGTATCGGAACAGTGAGT
Det1	GCCAGAGGTAAACCAGCAAG
Det1	GTTCATCAAGTACACCAGCG
Dis3l	GTCGATGCTGAACACGAGGT
Dis3l	GATCCTAGCCAACCACTGGG
Dis3l	AGTGTGTGACGTCAGCGATG
Dis3l	GATGCTGAACACGAGGTGGG
Disp2	GAGACACAGAGATAGGCCGA
Disp2	GCGCTCATGGAGCACCACGG
Disp2	CAGGCACCAGGACACCACGA
Disp2	GTCTACAGAGAGGCCCACAG
Dll4	CCAGCGAGACAGCTACCCAG
Dll4	CAGACTGAGCTACTCTTACC
Dll4	AAGAAGCGCGATGACCACTT
Dll4	CGAGTGTGTGATTGCCACAG
Dmxl2	AGCTATGGGAATAGGCTGGT
Dmxl2	TATATGACAAAGGTCCAATG
Dmxl2	GAAGAAGAAAGCGGTAGTGT
Dmxl2	AAGAAGAAAGCGGTAGTGTG
Dnaja4	AGAGACATCTATGACCAAGG
Dnaja4	AGGTGAGGTGATAAAGCATG
Dnaja4	GATGACGAAGAGCCCCGCGC
Dnaja4	CAGGTGAGGTGATAAAGCAT
Dnajc17	GTACGCGCTGCTCGGCATTG
Dnajc17	GACAGTTGCAAACTCCACTA
Dnajc17	GTATGGGGAGGTTCTCAACC
Dnajc17	GCTAAAGTGGAAGTGCAAGA
Dph6	AGAGTATGAGACATTCACGT
Dph6	AGAGTTTATACGCAATGTGA
Dph6	GAAATCGAAGGGGTATCAGT
Dph6	AGCTATATGTATCAGACAGT
Dpp8	GTTGTGGTGATAGACAACAG
Dpp8	AGGATCACATACGTACACAA
Dpp8	GGTTGATGAAGCCAGAAAGC
Dpp8	GCTGATACCAGAAAATACCA
Dtwd1	GTACGAAGGGAAGGATCACG
Dtwd1	TAAGAGCTTTGCGTGCACAG
Dtwd1	GTAATAAATGGCTTCAATTG
Dtwd1	GTGCAGAAAGAGAAGTACAG
Duox1	GCAGTGACCAGGCAACAACG
Duox1	GATGAGGCGATGGAAGTCCA
Duox1	TGAGAGAGAGGACCACGTGG
Duox1	TGTGAAAGGGTGATACTCGG
Duox2	GGGGTGAGTAGATCTCTCTG
Duox2	GGACATAAAGCACAACATAG
Duox2	GAAGCTGGGTAATTGGATGA
Duox2	AGTCCACAGCGGCATCAAAG
Duoxa1	TGGCATCGACAACATCACAT
Duoxa1	TGAAACCATCAACTACAATG
Duoxa1	GGTGACCAGCTTATTCATCG
Duoxa1	GATGCAGCCTCACAGACTGA
Duoxa2	GAAGTGGCAGAGCGGCACGC
Duoxa2	GTAGTAAGGCGTGAGGACGG
Duoxa2	GGCCAGCGTGAGCCAAAAGG
Duoxa2	GCCGTCCTCACGCCTTACTA
Dut	GTCATAGACGAGGATTACAG
Dut	GGATTACAGAGGAAACGTTG
Dut	GAGGATTACAGAGGAAACGT
Dut	TCACCTGAATAGGTCGTAGC
Edc3	GCTGAAGAGAGACAGCTCGT
Edc3	GACATGGCTATGGATTGGCT
Edc3	GATAGCCTGGGCGTCTACCA
Edc3	GATGACTTGCACATCATGGT
Ehd4	TGCGCTGGTACAGAGAGCGC
Ehd4	GCAGCTGATGCGAGTCTATG
Ehd4	AGACTGAGGGAAGCACCCCT
Ehd4	AGACGAGGAGGAGTTCGCGC
Eid1	GCCCGGCGAGGGCTATATGG
Eid1	GCTCTTCGATAAAAGCTAGC
Eid1	GGTTCGCAGGAACACCTTGT
Eid1	GCCGGAGATGCCCTGGATGG
Eif2ak4	GCTTTGTTCATGGATCACAG
Eif2ak4	AGTCAGGAGAGCCTCCATGG
Eif2ak4	GATTGACAAGTGCAAAAGGC
Eif2ak4	TGCGGGACACCATTGACCAG
Ell3	GATGCTAAGGCTCAACGAGG
Ell3	GAATTTGAGGAGAAGAACAG
Ell3	GACCTTGTGTACCAACGCTT
Ell3	GCCACACTGGGATACTATGA
Emc4	TGCCTACACATGCATCAGAC
Emc4	GCAAGAGACCGACCGGATCC
Emc4	GAACCTCTTCATCATGTACA
Emc4	AGCCAGTCTGATGCATGTGT
Emc7	GATCTCCGCGGCCCGAGTGC
Emc7	GCCTCAGGACTGGATCTCCG
Emc7	AGACTTTCTGATGAACCCAA
Emc7	TTTATTAAGAGGGAATCGTG
Etfa	TTTGTGAGAACTATCTATGC
Etfa	AGTGACCGACCAGAACTAAC
Etfa	GCTCAGCATGATGCATACAA
Etfa	TGCATGCTCAGCTATTACCA
Exd1	GTCGCCATGGGAAACTCTGT
Exd1	GAGAAGGGTGAAGCTCACAC
Exd1	GCACCAATCGAAGTGGAAGC
Exd1	CAGAGAGCCAGCGACAATCG
Fah	TGAGTGGAGAAAACACCATA
Fah	TGGAACCACAATCTCCCCGT
Fah	AGGAGAAGGAATGAGCCAGG
Fah	GCTCGGCCATGGTATCCCAC
Fam174b	AGGCAGGTCACGAAGCAGAC
Fam174b	CAGTATTTGACATCAAATAT
Fam174b	CAACAGCAGCGTCGACGCGG
Fam174b	CCTGAAGGCGACGGTGATCG
Fam189a1	AGGGCAGGAGTGGCGCACGC
Fam189a1	GGCCAAGGCACACACAATGG
Fam189a1	GATCAAGTTCGACAGTGTGG
Fam189a1	TGTGGCCAAGGCACACACAA
Fam214a	GTTCTCTAGAAAGTCCATGG
Fam214a	GGAGCCGGACATCTCTATGG
Fam214a	GTAGTCGTGTATGACCTACG
Fam214a	AGCCAGACGAACCAGATCTG
Fam219b	AGGTCAGTGAAGTTTAACAA
Fam219b	GAAGCACCGGGACCATGCCA
Fam219b	GGAGAAGCGGGGACCCTACT
Fam219b	GACACGCGCACCTTCCATTC
Fam227b	GGAGCAATCTGAGAGAACAT
Fam227b	GGAGACAGAGAAGAATATAG
Fam227b	CTATAGGCCAAAGAAAATCG
Fam227b	ACGCCTGCTGCCATGAATGG
Fam81a	GAGCATAAGTCGACCTACGA
Fam81a	CGAGCATAAGTCGACCTACG
Fam81a	CAGAAGATGCAGAATAAAGG
Fam81a	CAAGTGCTGGAGTCCCTCGT
Fam98b	AGAGTCCAGAAAAACCATGT
Fam98b	GTTGCATAAGGACTTTATCT
Fam98b	GACGAGTACCGAGTATGGAC
Fam98b	GCCCAAGACAACAGTCACAT
Fan1	TGATGTAGAAGTGTGCCATG
Fan1	AGAGAGGCTTCACATGTACG
Fan1	TGACAGCAGAGGCCGCTGGT
Fan1	AGTGCCGAAAGTCAGCAGCC
Fanci	GAAATGAAAGAGTAACATAC
Fanci	AATGAAAGAGTAACATACGG
Fanci	AGACTCACCTGACAGAACAC
Fanci	GATGTCGCATCAGAGATCAT
Fbn1	GGGCAGGACACATCTCACAG
Fbn1	AGAAGGACACAGCTCACATG
Fbn1	AGGGCCGCAGATGCACATGT
Fbn1	GACTACATGCAAGTGAACGG
Fbxl22	TGTGCAGGTGTGCAGCATCG
Fbxl22	AGAGAATGGAAGTGCAGCAG
Fbxl22	GCCGCAGCCCGACAGCGTGA
Fbxl22	GCGCGTTACCAACCGCACGC
Fbxo22	CGCAAGGTTACTCAGCACGT
Fbxo22	CGTGCTGAGTAACCTTGCGG
Fbxo22	TGACAGTCCAACCACACCTG
Fbxo22	AGTGTGTACGCAGAGTGCTG
Fem1b	GCTAGACAAAAGTACAACTG
Fem1b	GTACTGGACGATAATGTGGA
Fem1b	CGTGTGCAGACCCAGCAGAC
Fem1b	ATATGCTGCGATCATTAGGC
Fes	GACAGAGGGAGCCCGCCTGC
Fes	CTGCCCGAGGGATAGCCCCG
Fes	GACTTGTCTGAGGCCCGCTG
Fes	GTACCACGGGGCTATCCCTC
Fgf7	GACTGTTCTGTCGCACCCAG
Fgf7	GCTAAATGGACACACAGCGG
Fgf7	TGGAATTGTGGCAATCAAAG
Fgf7	CATCATGGAAATCAGGACCG
Fmn1	ATTGTGGCTTACCAGACTAG
Fmn1	ACACCATAAACACATAGCTG
Fmn1	TGGCTTACCAGACTAGCGGT
Fmn1	CAAGATGGAAGAAAGTCACT
Foxb1	GCTTCATCAAGATCCCGAGG
Foxb1	GCCGCTGCGTACAACCTGGG
Foxb1	GGGAGTACAAGATGCCTGGG
Foxb1	AGGGAGTACAAGATGCCTGG
Frmd5	GATATAGGCCGCTAACAAGG
Frmd5	AGATTCACAAGACCGAACTC
Frmd5	GACGTTAGAGACCTACGGAG
Frmd5	CGGAAGCACATGGTGAACGG
Fsd2	GCTGACAGCTAAATGTGTAC
Fsd2	GCTCCAGCATACACGCACTG
Fsd2	TGAGCATTTGGACTACACTG
Fsd2	GTTGAGGGCTCGCACATAGA
Fsip1	AGAAATGAGAGTTAAGCTGT
Fsip1	AAGTTCAAATGGTTCTCTGG
Fsip1	CAAGCATTCGAGAAGCCCAG
Fsip1	GCACAGACTCGACAAGCTAT
Furin	GCACCTGGCAGCTAACAGGG
Furin	GGCAGGTGACAACTGACCTG
Furin	GCTGAGGAGGCCTTCTTTCG
Furin	GCTTACAATGCCCGAATTGG
Gabpb1	GGCTCGGAGAAGAACCTCTG
Gabpb1	AGAGAAATGCCCATACTGTG
Gabpb1	TGGGCATTTCTCTACCACAG
Gabpb1	TTCATCTGGCCGCACAGTAT
Gabra5	TTGCCGGAAAAACACATCGA
Gabra5	TGTTTCAGAGCGAATCACGC
Gabra5	TGAGAGGGAGGCGTTGCATG
Gabra5	GCAGCTTGAGGACTTTCCAA
Gabrb3	GGTGAATGGAAACACGATGC
Gabrb3	GGATGAGCAAAACTGCACTT
Gabrb3	GTTGAGAGGGATCCCAGAAT
Gabrb3	TACGACAGCAGCGTGCATGA
Gabrg3	GAACCACAGTCAGTATGCAG
Gabrg3	CAGCTGATCAGAAATCATGG
Gabrg3	GCAGTGACATAGGACACCCG
Gabrg3	TGTAGCATACTCCATCAGTG
Galk2	GGGGCTCGAACATAAAACTT
Galk2	GGTGAGCACATAGATTACTG
Galk2	GCCAAGAGTGAGCGCTACAT
Galk2	GCTGCCTGGAATGAATTGCC
Ganc	GCTGGACATAGAGCACACGG
Ganc	GTGGACAGGAGACAACAAAG
Ganc	TGGCAGGAACACGTCAATCG
Ganc	GGACAAGAAGTACTTCACCT
Gatm	TGGGCATCGAGTGGATGCGT
Gatm	GCCGAGGCGGTGCACTACAT
Gatm	GCTAGATGAGAAGCGCGTGA
Gatm	GGTGCACTACATCGGCTCTC
Gchfr	GACAGGGGTGGGCCAGACGC
Gchfr	CCGAGTGCTGAGCATGACAG
Gchfr	AGCTTGTCCAGGACTATGCG
Gchfr	GCTGGTGTGGTGTCTGCACA
Gcnt3	AGCCCGGCAACTGATCGAGT
Gcnt3	GAAGCAGCAGCTCTTCACAG
Gcnt3	GACACAGTATACATTCTGAG
Gcnt3	GTTCACTGGGAATGCCTACA
Gdpgp1	TGGGATCCGAGTCATTCTGT
Gdpgp1	CAGGTGAAGATGGTTCACAG
Gdpgp1	GGGCCAGGTAGTAGCAATGC
Gdpgp1	GTCCTACTGAGCTTGCACCC
Gjd2	GGTGATAAAACAGAGACTGG
Gjd2	GATGGGGGAATGGACCATCT
Gjd2	GATCTTCCGGATACTCATTG
Gjd2	GTTCAGGATCCTGTTGACTG
Glce	GAAGTGGCGGAGGTCATAGA
Glce	AGGACATAAACACACCGTCA
Glce	GAAGATTGGGGACTCATCGA
Glce	AGGAACCAGGATGAGAAAGG
Gldn	GCACAGGATAGAGCATCAGA
Gldn	AGACCTGTGCAACAGTACCC
Gldn	AATGTTCAGTCACCCAAATG
Gldn	GCCAAGGGGCTACAGGCTGG
Gm14137	GAAGTGGGGAGTGTCCGAAA
Gm14137	GGATGCTCATCCCCCCACAA
Gm14137	GAAGTCATCCGAGAACTGCA
Gm14137	GCATCCCCGAGCCACCCTAC
Gnb5	GCTGCAGGCAGACAGGTAGT
Gnb5	GGACGAAGATGGCAACCGAT
Gnb5	GTCCACTTTCCACATCCCAC
Gnb5	AGAGCGCATGTCCCACACCA
Gpr176	AGTCTGGTAGACAACCAGGG
Gpr176	AGATCCACCAGCAACAGTGA
Gpr176	AGATCAGAACATACACCAGG
Gpr176	TAGATCCACCAGCAACAGTG
Gramd2	TTGGAGGAGGTGGTCCTCAA
Gramd2	GCTGTTTAAAGATATCCCGT
Gramd2	GATATCCTTGCCAAAGAGGC
Gramd2	GAGAGATATAGAGCCGACCA
Grem1	GATGTGCCTGGGGATGTAGA
Grem1	GAAGCAGACCATCCACGAGG
Grem1	GGTGCTTGAGTCCAGCCAAG
Grem1	GAATCGCACCGCATACACTG
Gtf2a2	TATACAGAAATACAACTTTG
Gtf2a2	AACTTGAAGCGCAAGCTGGG
Gtf2a2	GTTATACAGAAATACAACTT
Gtf2a2	GCACCTGTATGAGCTCATCA
Hacd3	GATGAGAGCAGGTAGCACCG
Hacd3	GAAGAAGGGGAGTCATTGGT
Hacd3	CCTTCTGACAAACATCCCAG
Hacd3	GATTGGGGTCACAAGTACCC
Hapln3	GTTCACCCTCGACTCAACTG
Hapln3	TGAGTCGAGGGTGAACTATA
Hapln3	GCTGCCGGGGCAGCACTATT
Hapln3	GTGGCAGGGCAGGGTCACGC
Haus2	TGGCAGAGAATATACTCAAG
Haus2	GTTCACCAAAATATCCATCT
Haus2	CTGTGATAAACAGCTTCCAA
Haus2	GGCAAGTTCTCCTGGCACAT
Hcn4	GGTGTCCATCAATGGCATGG
Hcn4	GATGAATGTATCGAATGAGG
Hcn4	CATGCTCAGCATGATCGTGG
Hcn4	GGAGGTCTACAAAACCGCTA
Hdc	TAACTGCTTAGGATTCACGT
Hdc	GATAGTAGGCGTGCATGTGG
Hdc	GATGGCCATGAGGTAAGAGC
Hdc	GCTTTCGCTCCATTAAGCTG
Hddc3	AGTCCAGGAGTACTTCGAGT
Hddc3	AGCCCGGATCCTAACCCATG
Hddc3	AGACAAGCTATACAATCTGA
Hddc3	AGCCTCATGGGTTAGGATCC
Herc1	GATACGGATAAGCTGAATAG
Herc1	AGTGTTGGAGAAAAATTGAG
Herc1	GTTAACAGATATCCGTACAC
Herc1	CTAATATTAGGAGCGCACAG
Herc2	GATGTTGGAGAGCTACACAG
Herc2	GCAGAAAGGCGGCACTTACT
Herc2	GAATGAGGGGCATTCCACTG
Herc2	TGTGATTGGCAGCAGAAAGG
Hexa	GCAAGGTGTTAATAACCCAG
Hexa	GTTGGGGAAGAACATTCTGG
Hexa	GGAGATGCAAGATATCACCA
Hexa	GTATCCAGGATGCTAGACAA
Higd2a	TGCCGCTAACCCCAACAAGA
Higd2a	CAAGACCCGTGAGAACCCAA
Higd2a	GGCCGCGGTGGAAGCAGTAA
Higd2a	AGCAGTAAAGGCCATAGGTG
Hmg20a	GCTTCGAGCAAAGAGACCAG
Hmg20a	AGATAAGGAGCGTTACATGA
Hmg20a	GAATTCCTGAACCACAGCAA
Hmg20a	GAATCGAACATATCCTGTAA
Homer2	GGAGAATCCCAAACCGAACA
Homer2	GGAGCTGAAGAGCTTCCTTG
Homer2	GTCACAGAAGTTCGGGCAGT
Homer2	CTCCGAGCTGCAGCTCACGA
Hykk	TGAAAGTGTGATCCCCCTGA
Hykk	GTAGGAGGTCACATCCTCGC
Hykk	AGAATGCTCACTTACCTCCC
Hykk	GACTTCGGTGACATGAGCTA
Hypk	AAGCCAAGGAAACATGACAG
Hypk	AGAGCGGGTTACTGACTATG
Hypk	GAGATCGAAATGGCGACCGA
Hypk	TGGTGCTGCTGACCTAGAGC
Ice2	TGTGCGGTGCAGCATCCAGA
Ice2	TGAGGCCCGACTCTTCACGG
Ice2	GCATAACCATGAGTGAACCA
Ice2	GGCTAGTCAGAGCTATCTGC
Idh2	GATGAACTGCCAGATGATCC
Idh2	AGAGCGAGCTCACAGCCCGC
Idh2	GGCCACCCAGAAGTACAGTG
Idh2	AGAGCCCTAACGGAACGATC
Idh3a	TGAGACACATGGCCGGACAT
Idh3a	AGCTTAACAAAAGATCTGGG
Idh3a	CATGGTCAAAAAGTCCCATG
Idh3a	GCATCATCACAGCACTAAGC
Igdcc3	GCAGGCCTGGAGATGGACTG
Igdcc3	GCTTCCAGTGCCAAATCCAT
Igdcc3	AGGTACACACTACTGCCCAA
Igdcc3	TGAGAAGGACGGCCCAGGGT
Igdcc4	GTAGTTGACAATCTTGACAG
Igdcc4	AGGATCTGGAAGGTCACTGA
Igdcc4	CAAGATGGGAGCCCGCACAG
Igdcc4	ACACCAGTGTAACCGAACGG
Igf1r	GATGAGAGACCAGTCTATGG
Igf1r	GAAAACTGCACGGTGATCGA
Igf1r	GAAACGAAGAACTTGCTCGT
Igf1r	AGACCAAGGCATGAGAATGG
Il16	GCTGATGGACGGCTTCAGGA
Il16	GCTGATGAAGGGCCAAGCAA
Il16	AGCTTGGCGAAGGATAGCTA
Il16	TGTGAAGAGCATCTTTGCAG
Imp3	GGAGCAAAGTAGGCAAGCGG
Imp3	GCAGCACACGCAGTTCGTGG
Imp3	GCTGCGAGTGACGAGAAAGG
Imp3	GATCTTGGATGAGTCCACCC
Inafm2	GAGCACGTAGGCGAACACCG
Inafm2	GTAGACGGCCAGTACGATGG
Inafm2	GAAGTGGGTCCGGCTAGCCA
Inafm2	AGTCTCATCTGGCAGCCGGT
Ino80	AGTACCTGGAGAGAGCCTTG
Ino80	AGTGATGACCACATGAAAGG
Ino80	CGAGCCATCCAGCCTCATGT
Ino80	TGCTCAGCCACACTTTCCTG
Iqch	GCAATGTAAAAGCCACGCCA
Iqch	AGGAGAAGAGGCCTACATCG
Iqch	GTAGAGGGTGAGCTGCGTCA
Iqch	CAGGTATGGGGATAAAATGG
Iqgap1	TGTAGGAAGTACCTGAATGC
Iqgap1	AGGTGGATGGAAGCATGCCT
Iqgap1	GCTGCAAATGGATACACCTG
Iqgap1	TCGAGAACAGACCAGATACA
Ireb2	AAATGAAAAGGACACAAGAC
Ireb2	GACTAGGCCAAATGTCATGC
Ireb2	GTTACAGCAACCCTATCCTG
Ireb2	GATCTGTCGGACAGGCAGGG
Isg20	GCTTCTGAAAGGCAAGCTGG
Isg20	GCAGCTTCTGAAAGGCAAGC
Isg20	GACAAGTACATCCGACCCGA
Isg20	ATTTGGTGAAGCCAGGCTAG
Isl2	GATGACCGGCTTGAGCCCGC
Isl2	GTTGAGCACAGTCCGTACCC
Isl2	AGAAGCAACTGCATACCCTG
Isl2	CGTGCTACGCCGCCAATCCG
Islr	GATAGGCACAGTCTGCAATC
Islr	GCTACGGCCTGGCTTCGTGC
Islr	GTTGTCATTGATCTGCAAGT
Islr	ACACAATGAGATCCGCTCGG
Islr2	GGCCTGGGCAGCGAGCACCC
Islr2	AAGAGGGGGTCAATGCCTAC
Islr2	GGGGTGGCACGGCAGTTCAG
Islr2	AGCGCGCCGAGTGCATCCCG
Itga11	GTACAGCAGCATGATATCAG
Itga11	AGAGAGCACGCGCCGCCGGG
Itga11	GTTGATTTGAACTACAGGGC
Itga11	AAGTGTTGGACCTCCACCCA
Itpka	TGAGCCACACACCAGCACGA
Itpka	AGTGAGCTGAGGGATCACCG
Itpka	GGAGCCTGAACACTACTGCC
Itpka	GTGCCCTGCTAACTGCACCC
Ivd	GGTAATGGAAGAGATATCCC
Ivd	GAAAGAGAAATACCTTCCCA
Ivd	GAAGTGAGGCGGTTGGTCAT
Ivd	GAGCTGGGACCAGTGAAGTG
Jmjd7	TGGCAGGTACAGCATCTCGC
Jmjd7	AGAGCATTTCGGATAATGCA
Jmjd7	TGTTGGGGCACACCCAATCC
Jmjd7	GGCGTTGCAAGAGTTCCCGG
Katnbl1	ATTCCTGCTGAATAGAACCT
Katnbl1	GAAAAGCAGTATATCTCACT
Katnbl1	TTCAAGCAGTAATAAAAAGG
Katnbl1	GAACCTGGGCCATTGTCTCA
Kbtbd13	GACCAGGTTGAGGCAATCGA
Kbtbd13	AGGTTGCTGGAGCTTCGTGG
Kbtbd13	GAGCTACGGTCACTTTATGG
Kbtbd13	GCGACCCAGCACCTACGTGG
Kif23	GACACTAAGAACATGCATGG
Kif23	GATGACACTAAGAACATGCA
Kif23	GATGTTTATAAGACGAGAGG
Kif23	AGTAGAAGTGAAATCTACGG
Kif7	AGCGGGGTCGAATCACCCTG
Kif7	TGAACAAGGTATCATCCCAA
Kif7	AGCCCTCAAAGAAAGCCTCG
Kif7	GAAATGTCATTAGCGCCCTG
Klf13	CGGGCTGCGAGAAAGTTTAC
Klf13	TGAAGCGCTTCTCACAGATG
Klf13	GGCAAAGTGGTCCACATAGG
Klf13	CGTGGTGGCTCGGATCCTAG
Klhl25	AGGCAGCCAGCACCGCACGA
Klhl25	AAAGCGGGCAATCAGCATAG
Klhl25	GTTCACGGATGTCACACTCT
Klhl25	GCATTCTTCAGGCAGTCTGA
Knstrn	GATGGGAGCAGCCGGCACCG
Knstrn	GTTTAATAAGCAAAAACCGG
Knstrn	GGAACAGCAGACCTTATGTA
Knstrn	GAGAGCAAAGGTCTCAACCC
Lactb	GTAGAGAAGAAGCAAACGTA
Lactb	GATAACTCCTATAAATGGGC
Lactb	CAGCAAAAGCCTCACCATGG
Lactb	TTCCCAGAAAAAGAATACGA
Larp6	GTTGAACGAGGACCACCGGA
Larp6	GGAGGATGCAGACCGCAGAT
Larp6	GGCGACACGGATCTGCACCG
Larp6	GGAGGAACTTCAGTACATGG
Lcmt2	GTACAGGTTCAGCCACACTT
Lcmt2	GGCGTCGGGGAAACGCTGGG
Lcmt2	GGACCAGCAGCGCCGCAAAG
Lcmt2	AGCCGTGTGAGAGTACCTTG
Lctl	GTGGTGCAAGGTCACAACGG
Lctl	AGTGGTGCAAGGTCACAACG
Lctl	CGGCACAGAATAGAGCCATG
Lctl	TGCTCCAGGTAGCATACGGC
Ldhal6b	TGAGGTAGTGATTATCACAG
Ldhal6b	TGGAGTGGTGTGAACATCGC
Ldhal6b	CAGCTCTCTCAGCGGCACGC
Ldhal6b	TCTCTACGGAATCAAAGAGG
Leo1	GTTGTGGTCGCCCTGCAGTG
Leo1	GAAGATTCGAATCTTACCAA
Leo1	GAAAGAAGAAGAACGCCTGA
Leo1	GGAACCATGGATCTGTTCGG
Lingo1	GTAGCTGCGCACATGCAAGT
Lingo1	GTCGAAGGGGAAAGGCACAG
Lingo1	AGATCTCTAAGACCTTAAGT
Lingo1	GGTCCCGGATGTGGGCCCGG
Lipc	GTTGCAAGGAGTCAATGAAG
Lipc	GCTGGAAGGAGCCCCCATTG
Lipc	GGAGTCAATGAAGAGGTGCA
Lipc	CGCTTATCATGATCATCCAC
Lman1l	GATCCCGATGCCATCCCATG
Lman1l	GAGCTCGGGTCACCTACTGG
Lman1l	GACCCCAAAGAAGCCTCCAG
Lman1l	AGCCCCTGGAGGCTTCTTTG
Loxl1	GGAAGCGCAATAGCACTCGG
Loxl1	AGATGCAACATCCACTACAC
Loxl1	TGCCTGCACCTCTCACACGC
Loxl1	TAGCACTCGGAGGTCATAGT
Lpcat4	GGGGGCAGCAACCAGGACAG
Lpcat4	GGTTGAGGAGGTCAGAAGGC
Lpcat4	GGTCAAAGAAAGTTGAGTGG
Lpcat4	GTCAAAGAAAGTTGAGTGGG
Lrrc28	AATCTGTAAGACGATCTCTG
Lrrc28	CAGACACTGGAGTTTCACGA
Lrrc28	AAGGAACTCCCTCACAACCT
Lrrc28	TTCTGGGCAAACGATCTCTA
Lrrc49	GCTGAAAGTTCAACAAACGA
Lrrc49	AGAGTCATGGTACAAACACA
Lrrc49	GAATCCTGTCAGCTCGACGG
Lrrc49	TGAGACCGTGGTGACCATGC
Lrrc57	CAGGGCAGACAACTGCCCAA
Lrrc57	GATGTCTCAGGCAACAAAGC
Lrrc57	GAGTCACTGAGGATGCTCTG
Lrrc57	AGGTAGATGGTAGCTCTCTC
Lrrk1	TGTCCCGACCACCAGCACAA
Lrrk1	ACGGTGTTGAGACTGCCCAG
Lrrk1	GCTCCAAGGCGAAGCAGAGC
Lrrk1	AGGACTATCCAGCAGGATGT
Ltk	GTAGGTAGAGCTCACCACTG
Ltk	ACGGATTCAGTACTGCACTC
Ltk	AGAACATTGTACGCTGTGTG
Ltk	GCAGCTAAGCAGACAGTTAC
Lysmd2	GATGCCCTGAAGCGTGTCCC
Lysmd2	GTCATTGGTAAACAGTTTGT
Lysmd2	GCCCAGAGGCGCCCGCACGC
Lysmd2	CGCGCTCAAGTACGGAGTCA
Lysmd4	AAGTAGACGAGATAGAACAC
Lysmd4	AGATTCCAGTGAGAAATCAT
Lysmd4	AGAATCCCATGATTTCTCAC
Lysmd4	TGATTGACTTCAAAGCATAC
Magel2	GATGCCAGCAAATTACACTG
Magel2	GAGCCCGCATCAGAACCGTA
Magel2	GACACAGGTACCTAGAGTAC
Magel2	GTTGACGATGATGTAAGTGT
Man2a2	GAATGGTGGGAACTTCCCCA
Man2a2	GAAGAGCAAAATCAGACAGC
Man2a2	GCTCTTGTAGAAAGGCCGGG
Man2a2	AGGGTATAGCAAAGTCAAGG
Man2c1	AGTGCTGGAGACCATCAAGC
Man2c1	ACTCGGACAGATCTATCCAG
Man2c1	TGGGTCAAGAGCCAGTACCC
Man2c1	TGGGAAGTGGACCAGCACTC
Map1a	AGTGCGTGCATCCTACTATG
Map1a	GATTCCCACTCATGATACGG
Map1a	TGGAAGGCAAGGCCCAATGG
Map1a	GGAAGGCAAGGCCCAATGGG
Map2k1	GGGCACGAGATCCTACATGT
Map2k1	GTAGAAGCCCACGATGTACG
Map2k1	GTAGGATCTCGTGCCCACGA
Map2k1	GCTACTGTTTGGATGCCATG
Map2k5	TGACTTTGGCGTGAGCACAC
Map2k5	TGAGTGATGAAATGTACAAA
Map2k5	AGATGAATGAACAAGACATA
Map2k5	ACATCCCTGAAGAGTAACTG
Mapk6	AGCCAGTTAACAGACGATGT
Mapk6	CCAAATGGTACAGATCTCCA
Mapk6	GATCCTCCTCGTGCACAACA
Mapk6	GGAGTATATGGAGACAGACT
Mapkbp1	GCTCTGCCCACAGACCACTG
Mapkbp1	AGGCAACTAAGCCAGATCGG
Mapkbp1	GTTTACACGAACGCACCACG
Mapkbp1	TGTGGCTGAACGTAGCCAGG
Mctp2	GTAGAGTTCAAAATTCCAGA
Mctp2	GAAGGAAGGCCGCAACCTCG
Mctp2	AGAGCAGAGGTACAAAAGCA
Mctp2	CGGTATATCATTCTACTCTG
Mef2a	GCTGCTCAGACTGTCCACAG
Mef2a	ACGCATGAGGATGGACACAT
Mef2a	AGTGACCGGGAGGATCCACG
Mef2a	GTACGACAAAGCATTAGGGC
Megf11	GCCCTGTGCAACCCTATCAC
Megf11	GTAGCTTACTCTGTTCACAG
Megf11	GAACAACAGGAGAACGATGC
Megf11	GGAGCAGAGCGGCACTCAGT
Meis2	GATGAGCTGCCCCATTACGG
Meis2	TTGGATGGTCAGCAACACAT
Meis2	GTTGACAGCAGATCCCATGC
Meis2	GAGACAAGGACGCAATCTAT
Mesp1	GATCTTGGTCAGGTTCTGGC
Mesp1	GACTCAGCGAGGACAACCTC
Mesp1	CCGCTACATTGGCCACCTGT
Mesp1	CAGACGGCCGGGCTTAAACG
Mesp2	TGTATTTGGGGACAATAAGG
Mesp2	TGGGAACAGGATCTCCAACG
Mesp2	GCCGACGGGTGGCGTAGCAA
Mesp2	TGTCACCCAGGGATCCACGT
Mex3b	AGTGAGGGTGCCATACCGCG
Mex3b	ACGTCGCGGAGATCGTAGGG
Mex3b	ACAGACCACTATCCAAGTGA
Mex3b	TGGCCTGAGTGACCGCCGTG
Mfap1a	CGAGCTCAAAAGAATCAAGA
Mfap1a	GCGGCGCAAGTACACCCTCA
Mfap1a	TTACCATGAAGAAGGCACCT
Mfap1a	CTACAGAAGTATTATCACCG
Mfge8	AGTGACAGGAATCATCACCC
Mfge8	AGGCATTGACGATCCCTGTG
Mfge8	AGTGCTTACCGGTTTCACAG
Mfge8	GAAACCCATATACACAGACG
Mga	GACTAGAGCACACACAACCC
Mga	GTGAGGGAGAGATTACATGG
Mga	GTACATCAGAGGTCACCTGG
Mga	GGTTCGACATTACCCACTGT
Mkrn3	GGACGAAGCAAATCCTCTGC
Mkrn3	TGAAAAGAATGCCAAAGCGG
Mkrn3	GTTCCTGGACAGCCTTACCG
Mkrn3	ACTGTCTTAGGTGTATCCGC
Mns1	GGAGATAGAAAGGATCATGA
Mns1	AGAGAGAGCAGCCCAGATCG
Mns1	GGGCATTCATGAGCTCAATG
Mns1	AGATCAAGAGAGGAGGAAGC
Morf4l1	AGTGCGAATTGGAGCGATGT
Morf4l1	GCCCTCACACGGCTTTCCGG
Morf4l1	GCCTCTTCTCTATGAAGCAA
Morf4l1	ACCTTTGCTTCATAGAGAAG
Mpi	GGATCTTGGCATCTCCCCGG
Mpi	TGGATGGGGACACACCCCCG
Mpi	GTAGTTGAGCATTTCACACA
Mpi	GGCATACTGCTGCACCACAC
Mrpl46	GAAAAAGAGCCGCCATGTGT
Mrpl46	GGAGCTCATGGTCTGAATAC
Mrpl46	GATGGCGGGTCTATTACAGC
Mrpl46	AGCGCCTTGGTGATCAGCGG
Mrps11	GGGGTCGGCAGCCATTGTGT
Mrps11	AAAGCCTTCTGTGCCACAGG
Mrps11	GGCATCGCCGCACAGACAGC
Mrps11	GCAGCCATTGTGTGGGACCG
Mtfmt	CGGGACCACGCCACCTCGGG
Mtfmt	CGAACCAGCAGCATTTGCGA
Mtfmt	AGGAACAGCACCCGCCAAGG
Mtfmt	TGGCACCAGCTGTGTCAAGT
Mthfs	GCAAAATCTGCTTCATCCCT
Mthfs	TTGCTCTGGAATTGGTACCG
Mthfs	CGGGAGGAGGCCTTATCCAC
Mthfs	TGCTCTGGAATTGGTACCGA
Mtmr10	CTTCACTGGAAAGTACCCGG
Mtmr10	GATACAGAAGGAGTGGGTCA
Mtmr10	GCACAACAAAGTATTCTGGA
Mtmr10	CAGAAGGAGTGGGTCATGGC
Myef2	AGTCAGCGGAAAAGGCCTGC
Myef2	ATGAATGGCATCAAGATCAG
Myef2	TGCTACTAGTCATTGCACCA
Myef2	CGGATGGAGAAAATGCTCGC
Myo1e	GAACCTGAAGAAGAGATACA
Myo1e	GGAGCAGGCCTGCTACACCA
Myo1e	GCTGACGCTAAAAGCAGAGC
Myo1e	GGTCCATGAAAAGCACATCC
Myo5a	GACATTACCCAGCAGAGTGC
Myo5a	GCAGCACTGAAGGTAGACGA
Myo5a	GTAGCACAGCGGGCTCGTGA
Myo5a	GCTGAAGAAACTCAAAATTG
Myo5c	AGACCAGCAAAGTGGCTCAG
Myo5c	AGAAGTCTATCAGAGTCCAG
Myo5c	GGGCCTGGAGACCAGCAAAG
Myo5c	GATGAGAGAAACCAGATCAT
Myo9a	GAAAGAAAAGAGACAATCCG
Myo9a	GCAGAGGTAAAGGAATTTGG
Myo9a	ATGCTCGAAGAACTGCCCAT
Myo9a	TGTGACAGTGAGAAACTCCA
Myzap	AGAATAATGAACTACAAAGC
Myzap	AGGCAAATGTCTGCAGACTG
Myzap	GGAGAAAGACCAGAAGATCG
Myzap	GAAGATCCGACAGCTCACCC
Nanog	TCTGAACCTGAGCTATAAGC
Nanog	ATAGCTCAGGTTCAGAATGG
Nanog	TGTAAGCAAGAATAGTTCTC
Nanog	GTAGTTCAGGAATAATTCCA
Ndn	GACATGGTGAAAGAGGTCAT
Ndn	CAGGTGCAGCCCGAACACTC
Ndn	CGTGAGGAAGATAATCACCG
Ndn	GCAGCCCGAACACTCTGGCG
Ndufaf1	TGGGGATGGACGGCCTTGGA
Ndufaf1	CCGTGGGGGACCCTACTGGC
Ndufaf1	GTTACTTCATGTTCACCCGT
Ndufaf1	GCTCAGAGTTCCATAAAGCA
Nedd4	GATGAGGAAGAACCACTCTC
Nedd4	GATGGCAATTGAGAACACAC
Nedd4	GAAGAAAGAACCCACACAGA
Nedd4	TGCTCTTGGCAGCTTATCAG
Neil1	TGGCATTGGCAACTATCTGC
Neil1	GATCCCAGTGGCCAAAGCGA
Neil1	AGGATCCTGACATCCCAAAG
Neil1	GTAAGGGGCTGGTATTTGGT
Neo1	GAAGCGAGTAGAGACCAGGG
Neo1	GCTGTGACCAGACCTCACAC
Neo1	AGGGTGGGAAGGGCGGACAT
Neo1	AGAGGACAGCATGTCTACAC
Ngrn	GTCCTGGTCAGTTCCAAGGT
Ngrn	CGTAGGCTCAAATTCTGTAG
Ngrn	GCAGCAAGGTAGTGCAGAGA
Ngrn	GGGAAGCCATGGAGCAGATC
Nipa1	TGAAGCCAGTAGGACCAGCG
Nipa1	GCTGATGTAGACCATGATGT
Nipa1	GCCCAGGCCGAGCGACACGG
Nipa1	AAACTTTCTAGCTTACACTG
Nipa2	GATACCCAAACCCTTCACAC
Nipa2	AGGACGCTGAGCGCACCTAG
Nipa2	AGCAAAATTGGCCACTTCAC
Nipa2	GCCACATTAGTGACTCCACT
Nmb	GTCGCCCAGAGGTTGCCCCG
Nmb	AACACTTACCGGTCGCCCAG
Nmb	AAGATTCGAGTGCACCCTCG
Nmb	TCGCCCAGAGGTTGCCCCGA
Nop10	CGATCGCGTTTATACGCTGA
Nop10	AGCCCTCAGAGGACAGGACG
Nop10	CTGGGGAGAACCGAGCAGGA
Nop10	GAGGACAGGACGCGGTTGCT
Nptn	CAGCTACTGGACAAGGAATG
Nptn	ACTGCAGGGTGACAGGAAGG
Nptn	GAAGTGAAAACAAAAATGAA
Nptn	TGTCCAGTAGCTGTACATAA
Nr2e3	TGAGAAGGAGGCTCATCTAC
Nr2e3	AGTTTCGGCGGTGATAAGGC
Nr2e3	CAGGGGCAGAGACCACTGTA
Nr2e3	GACCATAGGGAACACTCCGA
Nr2f2	GCTCCAGGTGAGGCGAAGGA
Nr2f2	GGCTACATCAGACAGACCAC
Nr2f2	GCTCTTGGAAGATCCGTATG
Nr2f2	TGAGGAGGAGACCGTGCGGA
Nrg4	GTAGATCACGAGCAGCCCTG
Nrg4	AGGTGCATTGAAAATTACAC
Nrg4	AGTCCAGTGTGAGATCAGCC
Nrg4	GGACTGAACTGGCCCTCTGA
Ntrk3	GTTCTCTGCAATGCACGTCA
Ntrk3	GTAGACAGTGAGAGCAACAC
Ntrk3	GCAAGACTGAGATCAATTGC
Ntrk3	GTGGACATGGAGCTCTACAC
Nusap1	GGGCCTCCGGGCTAACATGA
Nusap1	GAGGCCAGAGGACGGCAATG
Nusap1	GGTACAGAGAGCCTTCCTCT
Nusap1	GTCACGTCACCAAAACGAGG
Nutm1	TGGAGGATCAAGTTTCAAAG
Nutm1	GGGCCAGGGAACGAAGCACT
Nutm1	GGTCATAGTAGGCTTCAGTC
Nutm1	AGGGCTTCCGAGCAGCCACG
Oaz2	GCTGCAGGCACATTGTTCCA
Oaz2	AGCTGGGGACACTTACTCAA
Oaz2	TAGCTGATGGGAGCAAAGAA
Oaz2	GGATGATAAACACCCAGGAC
Oca2	GACCCACACTATCAGGACAA
Oca2	AAGGAGCCTAGTGAGATCGT
Oca2	AGCTAAAATTAGCAACCAGA
Oca2	TGAAGCATGAGATTCATGTC
Odf3l1	GATGACCGGAGGTACTTGGC
Odf3l1	AGCCAGTACAGGATGACCGG
Odf3l1	ACAATCAGTGGGCACAAGTG
Odf3l1	CGGTAGCCAAAAGTGTACTG
Oip5	TGAAACACGGCACATCTCTC
Oip5	TCATTGCGCGCGGTGCTACG
Oip5	GCACCGCGCGCAATGAAACA
Oip5	GAATATAAATGGAAACCAAC
Olfr1280	ATGTACTTCTCATATTATAG
Olfr1280	CTACCACAGTCATCATGTAG
Olfr1280	ATAGTGATAAATGCTGATAG
Olfr1280	TGCATGAATACTGATACTCT
Olfr1283	GTTGTGATCTCGTGGACCAT
Olfr1283	TCTGGCTCGTTGTGATCTCG
Olfr1283	TGCCATGAGTCAACTTATTC
Olfr1283	GGAAGAAGGAAACCAGACTG
Olfr1287	TGTGATGACTGAGTAAAATA
Olfr1287	CTCCAAAGAAGTACACACAG
Olfr1287	GGCAAGAAAGTTGTCAACCC
Olfr1287	GGAAGAAACAAACCAGACTG
Olfr1289	GAAAGTACATAGGCGAATGG
Olfr1289	AGCTACACTACAGTTATGCG
Olfr1289	GTACATAGGCGAATGGAGGT
Olfr1289	GGTCATTAGAATAATACCAT
Olfr1302	TGAACCTGAAAAGATGCACT
Olfr1302	GCAGTTCCACAATCACTACC
Olfr1302	AGACACATGAGTAAAATGGA
Olfr1302	AATCACTACCAGGTGACTCA
Onecut1	GATGCTGTAACGTTTGAGCT
Onecut1	GCTGTAACGTTTGAGCTCGG
Onecut1	TTGCATGTAGAGTTCGACGT
Onecut1	GCCGTTGATGGGTACCATGC
Otud7a	AGGGTGCTTACCTAGCGAGG
Otud7a	AGACTTTGTTCGGTCCACGG
Otud7a	TGAAAAGTGAGCTTGATCGT
Otud7a	CATACTACGGAGACCCATTG
Pak6	GGATCCTTCTCGAATCACAC
Pak6	CTGGCCCGGGAGAAGCACTC
Pak6	TGACTACCAGCACCTCAACG
Pak6	GGACAGCTACGTGAAGATTG
Paqr5	GTACACATGTACACAAGCAT
Paqr5	GGAGTGAGTCCCAAGTGTAG
Paqr5	GCTGAGAATGGTGTTTAGCA
Paqr5	GGCGAGGGGGTACACGCAGC
Parp16	TGGAGTGGAAGTTCTCTAGG
Parp16	GCTTCTGGGAATACACCAGC
Parp16	GAAAAGATCCAGCAGCTGAC
Parp16	AATTTCAAATAGGAAATCCG
Parp6	GAATGGGCAAAGGACAGCAC
Parp6	TGCATCCTACACCAAACTGC
Parp6	CGGACAGCCAAGAAGCTCTA
Parp6	GTCCATCCGGGAGATGACCC
Patl2	GATCAGGAGGGGCAGATGGT
Patl2	GACCCGAAAAGAGAAGGACT
Patl2	GCTGCTTGGACAAAAGACCA
Patl2	AACATGTTGATACAGCTACC
Pcsk6	GCAGCGCTGACGCAGATCTG
Pcsk6	GCATATAATGCAAAGATAGG
Pcsk6	TGGGCAGTGCAAGTGCTGGG
Pcsk6	GCTCCAGGTACACCACACGC
Pdcd7	GCTCCCCAGCAACGACATCT
Pdcd7	GCTGCAGGAGGTGAGCAAGT
Pdcd7	GGAGGAAGGACCCATCCTTG
Pdcd7	GGGAGCAGGAGATTGACCGC
[truncated: 748 more rows]

## Sheet: 20bp NTC gRNAs
Name	gRNA Sequences
[truncated: 2,000 more rows]

[truncated: 1 more sheets: 14bp NTC gRNAs]
