# Supplementary material for: Aneuploidy drives the acquisition of cancer-specific driver genes
Source: Research Square preprint supplement (doi:10.21203/rs.3.rs-4941895/v1), 2024-09-04
Supplement: Supplementary file 6 [file ce593e85eb599923d6dbf4be.xlsx]

## Sheet: Chr4p_q Genes in Library
Human Gene	Mouse Homolog
PIGG	Pigg		Human Genes		498
PDE6B	Pde6b		Mouse Homologs		498
ATP5ME	Atp5k
PCGF3	Pcgf3
CPLX1	Cplx1
GAK	Gak
TMEM175	Tmem175
DGKQ	Dgkq
SLC26A1	Slc26a1
IDUA	Idua
FGFRL1	Fgfrl1
SPON2	Spon2
CTBP1	Ctbp1
MAEA	Maea
UVSSA	Uvssa
NKX1-1	Nkx1-1
FAM53A	Fam53a
SLBP	Slbp
TMEM129	Tmem129
TACC3	Tacc3
FGFR3	Fgfr3
LETM1	Letm1
NELFA	Nelfa
C4orf48	Gm1673
NAT8L	Nat8l
POLN	Poln
HAUS3	Haus3
MXD4	Mxd4
ZFYVE28	Zfyve28
CFAP99	Cfap99
RNF4	Rnf4
TNIP2	Tnip2
SH3BP2	Sh3bp2
ADD1	Add1
MFSD10	Mfsd10
NOP14	Nop14
GRK4	Grk4
HTT	Htt
MSANTD1	Msantd1
RGS12	Rgs12
HGFAC	Hgfac
DOK7	Dok7
LRPAP1	Lrpap1
ADRA2C	Adra2c
TMEM128	Tmem128
LYAR	Lyar
ZBTB49	Zbtb49
NSG1	Nsg1
STX18	Stx18
MSX1	Msx1
CYTL1	Cytl1
STK32B	Stk32b
EVC2	Evc2
EVC	Evc
CRMP1	Crmp1
JAKMIP1	Jakmip1
WFS1	Wfs1
PPP2R2C	Ppp2r2c
MAN2B2	Man2b2
MRFAP1	Mrfap1
BLOC1S4	Bloc1s4
KIAA0232	D5Ertd579e
TBC1D14	Tbc1d14
CCDC96	Ccdc96
TADA2B	Tada2b
GRPEL1	Grpel1
SORCS2	Sorcs2
PSAPL1	Psapl1
AFAP1	Afap1
ABLIM2	Ablim2
SH3TC1	Sh3tc1
HTRA3	Htra3
ACOX3	Acox3
TRMT44	Trmt44
CPZ	Cpz
HMX1	Hmx1
DEFB131A	Defb43
SLC2A9	Slc2a9
DRD5	Drd5
WDR1	Wdr1
ZNF518B	Zfp518b
CLNK	Clnk
HS3ST1	Hs3st1
RAB28	Rab28
NKX3-2	Nkx3-2
BOD1L1	Bod1l
CPEB2	Cpeb2
C1QTNF7	C1qtnf7
CC2D2A	Cc2d2a
FBXL5	Fbxl5
BST1	Bst1
CD38	Cd38
FGFBP1	Fgfbp1
PROM1	Prom1
TAPT1	Tapt1
LDB2	Ldb2
QDPR	Qdpr
CLRN2	Clrn2
LAP3	Lap3
MED28	Med28
FAM184B	Fam184b
NCAPG	Ncapg
LCORL	Lcorl
SLIT2	Slit2
PACRGL	Pacrgl
KCNIP4	Kcnip4
ADGRA3	Adgra3
PPARGC1A	Ppargc1a
DHX15	Dhx15
SOD3	Sod3
CCDC149	Ccdc149
LGI2	Lgi2
SEPSECS	Sepsecs
PI4K2B	Pi4k2b
ZCCHC4	Zcchc4
ANAPC4	Anapc4
SLC34A2	Slc34a2
SEL1L3	Sel1l3
SMIM20	Smim20
RBPJ	Rbpj
CCKAR	Cckar
TBC1D19	Tbc1d19
STIM2	Stim2
PCDH7	Pcdh7
ARAP2	Arap2
DTHD1	Dthd1
NWD2	Nwd2
C4orf19	0610040J01Rik
RELL1	Rell1
PGM2	Pgm2
TBC1D1	Tbc1d1
KLF3	Klf3
TLR1	Tlr1
TLR6	Tlr6
FAM114A1	Fam114a1
TMEM156	Tmem156
KLHL5	Klhl5
WDR19	Wdr19
RFC1	Rfc1
KLB	Klb
RPL9	Rpl9-ps1
LIAS	Lias
UGDH	Ugdh
SMIM14	Smim14
UBE2K	Ube2k
PDS5A	Pds5a
N4BP2	N4bp2
RHOH	Rhoh
CHRNA9	Chrna9
RBM47	Rbm47
NSUN7	Nsun7
APBB2	Apbb2
UCHL1	Uchl1
LIMCH1	Limch1
PHOX2B	Phox2b
TMEM33	Tmem33
SLC30A9	Slc30a9
BEND4	Bend4
SHISA3	Shisa3
ATP8A1	Atp8a1
GRXCR1	Grxcr1
KCTD8	Kctd8
YIPF7	Yipf7
GUF1	Guf1
GNPDA2	Gnpda2
GABRG1	Gabrg1
GABRA2	Gabra2
COX7B2	Cox7b2
GABRA4	Gabra4
GABRB1	Gabrb1
COMMD8	Commd8
CORIN	Corin
NFXL1	Nfxl1
NIPAL1	Nipal1
CNGA1	Cnga1
TXK	Txk
SLAIN2	Slain2
SLC10A4	Slc10a4
ZAR1	Zar1
FRYL	Fryl
OCIAD1	Ociad1
OCIAD2	Ociad2
CWH43	Cwh43
SEC31A	Sec31a
LIN54	Lin54
COPS4	Cops4
PLAC8	Plac8
COQ2	Coq2
HPSE	Hpse
HELQ	Helq
MRPS18C	Mrps18c
NKX6-1	Nkx6-1
CDS1	Cds1
WDFY3	Wdfy3
ARHGAP24	Arhgap24
MAPK10	Mapk10
PTPN13	Ptpn13
SLC10A6	Slc10a6
C4orf36	1700016H13Rik
AFF1	Aff1
KLHL8	Klhl8
HSD17B13	Hsd17b13
HSD17B11	Hsd17b11
NUDT9	Nudt9
SPARCL1	Sparcl1
DSPP	Dspp
DMP1	Dmp1
IBSP	Ibsp
MEPE	Mepe
SPP1	Spp1
PKD2	Pkd2
ABCG2	Abcg2
PPM1K	Ppm1k
HERC6	Herc6
PYURF	Pyurf
PIGY	Pigyl
HERC3	Herc3
NAP1L5	Nap1l5
FAM13A	Fam13a
TIGD2	Tigd2
GPRIN3	Gprin3
SNCA	Snca
MMRN1	Mmrn1
CCSER1	Ccser1
GRID2	Grid2
ATOH1	Atoh1
SMARCAD1	Smarcad1
HPGDS	Hpgds
PDLIM5	Pdlim5
BMPR1B	Bmpr1b
UNC5C	Unc5c
PDHA2	Pdha2
STPG2	Stpg2
RAP1GDS1	Rap1gds1
TSPAN5	Tspan5
EIF4E	Eif4e
METAP1	Metap1
ADH5	Adh5
ADH4	Adh4
ADH1A	Adh1
ADH7	Adh7
C4orf17	4930579F01Rik
TRMT10A	Trmt10a
MTTP	Mttp
C4orf54	1110002E22Rik
DAPP1	Dapp1
LAMTOR3	Lamtor3
DNAJB14	Dnajb14
H2AFZ	H2afz
DDIT4L	Ddit4l
EMCN	Emcn
PPP3CA	Ppp3ca
BANK1	Bank1
SLC39A8	Slc39a8
NFKB1	Nfkb1
MANBA	Manba
UBE2D3	Ube2d3
CISD2	Cisd2
SLC9B1	Slc9b1
SLC9B2	Slc9b2
BDH2	Bdh2
CENPE	Cenpe
TACR3	Tacr3
CXXC4	Cxxc4
PPA2	Ppa2
ARHGEF38	Arhgef38
INTS12	Ints12
GSTCD	Gstcd
NPNT	Npnt
TBCK	Tbck
AIMP1	Aimp1
DKK2	Dkk2
PAPSS1	Papss1
SGMS2	Sgms2
CYP2U1	Cyp2u1
HADH	Hadh
LEF1	Lef1
RPL34	Rpl34
OSTC	Ostc
ETNPPL	Etnppl
COL25A1	Col25a1
SEC24B	Sec24b
CASP6	Casp6
PLA2G12A	Pla2g12a
CFI	Cfi
GAR1	Gar1
RRH	Rrh
LRIT3	Lrit3
EGF	Egf
ELOVL6	Elovl6
ENPEP	Enpep
PITX2	Pitx2
AP1AR	Ap1ar
TIFA	Tifa
ALPK1	Alpk1
NEUROG2	Neurog2
ZGRF1	Zgrf1
LARP7	Larp7
CAMK2D	Camk2d
ARSJ	Arsj
UGT8	Ugt8a
NDST4	Ndst4
TRAM1L1	Tram1l1
NDST3	Ndst3
PRSS12	Prss12
METTL14	Mettl14
SEC24D	Sec24d
SYNPO2	Synpo2
MYOZ2	Myoz2
USP53	Usp53
C4orf3	1810037I17Rik
FABP2	Fabp2
PDE5A	Pde5a
MAD2L1	Mad2l1
PRDM5	Prdm5
NDNF	Ndnf
TNIP3	Tnip3
QRFPR	Qrfpr
ANXA5	Anxa5
EXOSC9	Exosc9
CCNA2	Ccna2
BBS7	Bbs7
TRPC3	Trpc3
ADAD1	Adad1
IL2	Il2
IL21	Il21
BBS12	Bbs12
FGF2	Fgf2
NUDT6	Nudt6
SPATA5	Spata5
SPRY1	Spry1
FAT4	Fat4
SLC25A31	Slc25a31
HSPA4L	Hspa4l
MFSD8	Mfsd8
LARP1B	Larp1b
PGRMC2	Pgrmc2
JADE1	Jade1
SCLT1	Sclt1
PCDH10	Pcdh10
PABPC4L	Pabpc4l
PCDH18	Pcdh18
SLC7A11	Slc7a11
ELF2	Elf2
MGARP	Mgarp
NDUFC1	Ndufc1
NAA15	Naa15
RAB33B	Rab33b
SETD7	Setd7
MGST2	Mgst2
MAML3	Maml3
SCOC	Scoc
CLGN	Clgn
MGAT4D	Mgat4d
ELMOD2	Elmod2
UCP1	Ucp1
TBC1D9	Tbc1d9
RNF150	Rnf150
IL15	Il15
INPP4B	Inpp4b
USP38	Usp38
GAB1	Gab1
SMARCA5	Smarca5
FREM3	Frem3
GYPA	Gypa
HHIP	Hhip
ANAPC10	Anapc10
ABCE1	Abce1
OTUD4	Otud4
SMAD1	Smad1
MMAA	Mmaa
ZNF827	Zfp827
SLC10A7	Slc10a7
POU4F2	Pou4f2
TTC29	Ttc29
EDNRA	Ednra
TMEM184C	Tmem184c
ARHGAP10	Arhgap10
NR3C2	Nr3c2
DCLK2	Dclk2
LRBA	Lrba
MAB21L2	Mab21l2
RPS3A	Rps3a1
SH3D19	Sh3d19
PRSS48	Prss48
FAM160A1	Fam160a1
GATB	Gatb
FBXW7	Fbxw7
TMEM154	Tmem154
TIGD4	Tigd4
ARFIP1	Arfip1
FHDC1	Fhdc1
TRIM2	Trim2
MND1	Mnd1
TLR2	Tlr2
SFRP2	Sfrp2
DCHS2	Dchs2
PLRG1	Plrg1
FGB	Fgb
FGA	Fga
FGG	Fgg
LRAT	Lrat
RBM46	Rbm46
NPY2R	Npy2r
MAP9	Map9
ASIC5	Asic5
TDO2	Tdo2
CTSO	Ctso
PDGFC	Pdgfc
GLRB	Glrb
GRIA2	Gria2
FAM198B	Fam198b
TMEM144	Tmem144
RXFP1	Rxfp1
C4orf46	4930579G24Rik
ETFDH	Etfdh
PPID	Ppid
FNIP2	Fnip2
C4orf45	Gm17359
RAPGEF2	Rapgef2
FSTL5	Fstl5
NAF1	Naf1
NPY1R	Npy1r
NPY5R	Npy5r
TKTL2	Tktl2
TMA16	Tma16
2023-03-01	2023-03-01
APELA	Apela
TRIM60	Trim60
TMEM192	Tmem192
MSMO1	Msmo1
CPE	Cpe
TLL1	Tll1
SPOCK3	Spock3
ANXA10	Anxa10
DDX60	Ddx60
PALLD	Palld
CBR4	Cbr4
SH3RF1	Sh3rf1
NEK1	Nek1
CLCN3	Clcn3
MFAP3L	Mfap3l
AADAT	Aadat
GALNTL6	Galntl6
GALNT7	Galnt7
HMGB2	Hmgb2
SAP30	Sap30
SCRG1	Scrg1
HAND2	Hand2
FBXO8	Fbxo8
CEP44	Cep44
HPGD	Hpgd
GLRA3	Glra3
ADAM29	Adam29
GPM6A	Gpm6a
SPATA4	Spata4
ASB5	Asb5
SPCS3	Spcs3
VEGFC	Vegfc
NEIL3	Neil3
AGA	Aga
TENM3	Tenm3
DCTD	Dctd
WWC2	Wwc2
CLDN22	Cldn22
CLDN24	Cldn24
CDKN2AIP	Cdkn2aip
ING2	Ing2
RWDD4	Rwdd4a
TRAPPC11	Trappc11
STOX2	Stox2
ENPP6	Enpp6
IRF2	Irf2
CASP3	Casp3
PRIMPOL	Primpol
CENPU	Cenpu
ACSL1	Acsl1
HELT	Helt
SLC25A4	Slc25a4
CFAP97	Cfap97
SNX25	Snx25
LRP2BP	Lrp2bp
ANKRD37	Ankrd37
UFSP2	Ufsp2
C4orf47	1700029J07Rik
CCDC110	Ccdc110
PDLIM3	Pdlim3
SORBS2	Sorbs2
TLR3	Tlr3
FAM149A	Fam149a
CYP4V2	Cyp4v3
F11	F11
MTNR1A	Mtnr1a
FAT1	Fat1
ZFP42	Zfp42
TRIML2	Triml2
TRIML1	Triml1
FRG1	Frg1

## Sheet: Chr5q Genes in Library
Human Gene	Mouse Homolog
EMB	Emb		Human Genes		539
PARP8	Parp8		Mouse Homologs		539
ISL1	Isl1
ITGA1	Itga1
PELO	Pelo
ITGA2	Itga2
MOCS2	Mocs2
FST	Fst
NDUFS4	Ndufs4
ARL15	Arl15
HSPB3	Hspb3
SNX18	Snx18
ESM1	Esm1
GZMK	Gzmk
GZMA	Gzma
CDC20B	Cdc20b
GPX8	Gpx8
MCIDAS	Mcidas
CCNO	Ccno
DHX29	Dhx29
SLC38A9	Slc38a9
DDX4	Ddx4
IL31RA	Il31ra
IL6ST	Il6st
ANKRD55	Ankrd55
MAP3K1	Map3k1
MIER3	Mier3
GPBP1	Gpbp1
ACTBL2	Actbl2
PLK2	Plk2
GAPT	Gapt
RAB3C	Rab3c
PDE4D	Pde4d
DEPDC1B	Depdc1b
ELOVL7	Elovl7
ERCC8	Ercc8
NDUFAF2	Ndufaf2
SMIM15	Smim15
ZSWIM6	Zswim6
KIF2A	Kif2a
DIMT1	Dimt1
IPO11	Ipo11
HTR1A	Htr1a
RNF180	Rnf180
RGS7BP	Rgs7bp
SREK1IP1	Srek1ip1
CWC27	Cwc27
ADAMTS6	Adamts6
CENPK	Cenpk
PPWD1	Ppwd1
TRIM23	Trim23
TRAPPC13	Trappc13
SGTB	Sgtb
NLN	Nln
SREK1	Srek1
MAST4	Mast4
CD180	Cd180
PIK3R1	Pik3r1
SLC30A5	Slc30a5
CCNB1	Ccnb1
CENPH	Cenph
MRPS36	Mrps36
CDK7	Cdk7
CCDC125	Ccdc125
AK6	Ak6
TAF9	Taf9
RAD17	Rad17
MARVELD2	Marveld2
OCLN	Ocln
SERF1A	Serf1
SMN1	Smn1
BDP1	Bdp1
MCCC2	Mccc2
CARTPT	Cartpt
MAP1B	Map1b
MRPS27	Mrps27
PTCD2	Ptcd2
ZNF366	Zfp366
TNPO1	Tnpo1
FCHO2	Fcho2
TMEM171	Tmem171
TMEM174	Tmem174
FOXD1	Foxd1
BTF3	Btf3
ANKRA2	Ankra2
UTP15	Utp15
ARHGEF28	Arhgef28
ENC1	Enc1
HEXB	Hexb
GFM2	Gfm2
NSA2	Nsa2
FAM169A	Fam169a
GCNT4	Gcnt4
HMGCR	Hmgcr
COL4A3BP	Col4a3bp
POLK	Polk
ANKDD1B	Ankdd1b
POC5	Poc5
SV2C	Sv2c
IQGAP2	Iqgap2
F2RL2	F2rl2
F2R	F2r
F2RL1	F2rl1
S100Z	S100z
CRHBP	Crhbp
AGGF1	Aggf1
ZBED3	Zbed3
PDE8B	Pde8b
WDR41	Wdr41
OTP	Otp
TBCA	Tbca
AP3B1	Ap3b1
SCAMP1	Scamp1
LHFPL2	Lhfpl2
ARSB	Arsb
DMGDH	Dmgdh
BHMT2	Bhmt2
BHMT	Bhmt
JMY	Jmy
HOMER1	Homer1
CMYA5	Cmya5
MTX3	Mtx3
THBS4	Thbs4
SERINC5	Serinc5
SPZ1	Spz1
ZFYVE16	Zfyve16
FAM151B	Fam151b
ANKRD34B	Ankrd34b
DHFR	Dhfr
MSH3	Msh3
RASGRF2	Rasgrf2
CKMT2	Ckmt2
ZCCHC9	Zcchc9
ACOT12	Acot12
SSBP2	Ssbp2
ATG10	Atg10
ATP6AP1L	Atp6ap1l
TMEM167A	Tmem167
XRCC4	Xrcc4
VCAN	Vcan
HAPLN1	Hapln1
EDIL3	Edil3
RASA1	Rasa1
CCNH	Ccnh
TMEM161B	Tmem161b
CETN3	Cetn3
MBLAC2	Mblac2
POLR3G	Polr3g
LYSMD3	Lysmd3
ADGRV1	Adgrv1
ARRDC3	Arrdc3
NR2F1	Nr2f1
FAM172A	Fam172a
POU5F2	Pou5f2
MCTP1	Mctp1
TTC37	Ttc37
ARSK	Arsk
GPR150	Gpr150
RFESD	Rfesd
SPATA9	Spata9
RHOBTB3	Rhobtb3
GLRX	Glrx
ELL2	Ell2
PCSK1	Pcsk1
CAST	Cast
ERAP1	Erap1
LNPEP	Lnpep
LIX1	Lix1
RGMB	Rgmb
CHD1	Chd1
FAM174A	Fam174a
ST8SIA4	St8sia4
SLCO4C1	Slco4c1
PAM	Pam
GIN1	Gin1
PPIP5K2	Ppip5k2
C5orf30	D1Ertd622e
NUDT12	Nudt12
EFNA5	Efna5
FBXL17	Fbxl17
FER	Fer
PJA2	Pja2
MAN2A1	Man2a1
TMEM232	Tmem232
SLC25A46	Slc25a46
TSLP	Tslp
WDR36	Wdr36
CAMK4	Camk4
STARD4	Stard4
NREP	Nrep
APC	Apc
SRP19	Srp19
REEP5	Reep5
DCP2	Dcp2
MCC	Mcc
TSSK1B	Tssk1
YTHDC2	Ythdc2
TRIM36	Trim36
PGGT1B	Pggt1b
CCDC112	Ccdc112
FEM1C	Fem1c
TICAM2	Ticam2
TMED7	Tmed7
CDO1	Cdo1
ATG12	Atg12
AP3S1	Ap3s1
LVRN	Lvrn
ARL14EPL	Arl14epl
COMMD10	Commd10
SEMA6A	Sema6a
DTWD2	Dtwd2
DMXL1	Dmxl1
TNFAIP8	Tnfaip8
HSD17B4	Hsd17b4
FAM170A	Fam170a
PRR16	Prr16
FTMT	Ftmt
SRFBP1	Srfbp1
LOX	Lox
ZNF474	Zfp474
SNCAIP	Sncaip
SNX2	Snx2
SNX24	Snx24
PPIC	Ppic
PRDM6	Prdm6
CEP120	Cep120
CSNK1G3	Csnk1g3
ZNF608	Zfp608
GRAMD2B	Gramd3
ALDH7A1	Aldh7a1
PHAX	Phax
TEX43	Tex43
LMNB1	Lmnb1
2023-03-03	2023-03-03
C5orf63	C330018D20Rik
MEGF10	Megf10
PRRC1	Prrc1
CTXN3	Ctxn3
SLC12A2	Slc12a2
FBN2	Fbn2
SLC27A6	Slc27a6
ISOC1	Isoc1
ADAMTS19	Adamts19
CHSY3	Chsy3
HINT1	Hint1
LYRM7	Lyrm7
CDC42SE2	Cdc42se2
RAPGEF6	Rapgef6
FNIP1	Fnip1
MEIKIN	Meikin
ACSL6	Acsl6
IL3	Il3
CSF2	Csf2
P4HA2	P4ha2
PDLIM4	Pdlim4
SLC22A4	Slc22a4
SLC22A5	Slc22a5
IRF1	Irf1
IL5	Il5
RAD50	Rad50
IL13	Il13
IL4	Il4
KIF3A	Kif3a
2023-09-08	2023-09-08
SOWAHA	Sowaha
SHROOM1	Shroom1
GDF9	Gdf9
UQCRQ	Uqcrq
LEAP2	Leap2
AFF4	Aff4
ZCCHC10	Zcchc10
HSPA4	Hspa4
FSTL4	Fstl4
C5orf15	9530068E07Rik
VDAC1	Vdac1
TCF7	Tcf7
SKP1	Skp1a
PPP2CA	Ppp2ca
CDKL3	Cdkl3
UBE2B	Ube2b
CDKN2AIPNL	Cdkn2aipnl
JADE2	Jade2
SAR1B	Sar1b
SEC24A	Sec24a
CAMLG	Caml
DDX46	Ddx46
C5orf24	B230219D22Rik
TXNDC15	Txndc15
PCBD2	Pcbd2
CATSPER3	Catsper3
PITX1	Pitx1
H2AFY	H2afy
TIFAB	Tifab
NEUROG1	Neurog1
CXCL14	Cxcl14
SLC25A48	Slc25a48
IL9	Il9
LECT2	Lect2
TGFBI	Tgfbi
SMAD5	Smad5
TRPC7	Trpc7
SPOCK1	Spock1
KLHL3	Klhl3
HNRNPA0	Hnrnpa0
MYOT	Myot
PKD2L2	Pkd2l2
FAM13B	Fam13b
WNT8A	Wnt8a
NME5	Nme5
BRD8	Brd8
KIF20A	Kif20a
CDC23	Cdc23
GFRA3	Gfra3
CDC25C	Cdc25c
FAM53C	Fam53c
KDM3B	Kdm3b
REEP2	Reep2
EGR1	Egr1
ETF1	Etf1
HSPA9	Hspa9
CTNNA1	Ctnna1
LRRTM2	Lrrtm2
SIL1	Sil1
MATR3	Matr3
PAIP2	Paip2
SLC23A1	Slc23a1
MZB1	Mzb1
PROB1	Prob1
SPATA24	Spata24
DNAJC18	Dnajc18
ECSCR	Ecscr
SMIM33	1700066B19Rik
TMEM173	Tmem173
UBE2D2	Ube2d2a
CXXC5	Cxxc5
PSD2	Psd2
NRG2	Nrg2
PURA	Pura
CYSTM1	Cystm1
PFDN1	Pfdn1
HBEGF	Hbegf
SLC4A9	Slc4a9
ANKHD1	Ankhd1
SRA1	Sra1
EIF4EBP3	Eif4ebp3
SLC35A4	Slc35a4
CD14	Cd14
NDUFA2	Ndufa2
TMCO6	Tmco6
IK	Ik
WDR55	Wdr55
DND1	Dnd1
HARS	Hars
HARS2	Hars2
ZMAT2	Zmat2
PCDHA1	Pcdha1
PCDHA2	Pcdha2
PCDHA3	Pcdha3
PCDHA5	Pcdha5
PCDHA6	Pcdha6
PCDHA7	Pcdha7
PCDHA8	Pcdha8
PCDHA9	Pcdha9
PCDHA11	Pcdha11
PCDHA12	Pcdha12
PCDHAC1	Pcdhac1
PCDHAC2	Pcdhac2
PCDHB1	Pcdhb1
PCDHB2	Pcdhb2
PCDHB3	Pcdhb3
PCDHB4	Pcdhb4
PCDHB5	Pcdhb5
PCDHB6	Pcdhb6
PCDHB7	Pcdhb7
PCDHB8	Pcdhb8
PCDHB16	Pcdhb16
PCDHB9	Pcdhb9
PCDHB10	Pcdhb10
PCDHB11	Pcdhb11
PCDHB12	Pcdhb12
PCDHB13	Pcdhb13
PCDHB14	Pcdhb14
PCDHB15	Pcdhb15
TAF7	Taf7
SLC25A2	Slc25a2
PCDHGA1	Pcdhga1
PCDHGA2	Pcdhga2
PCDHGA3	Pcdhga3
PCDHGB1	Pcdhgb1
PCDHGA4	Pcdhga4
PCDHGB2	Pcdhgb2
PCDHGA5	Pcdhga5
PCDHGA6	Pcdhga6
PCDHGA7	Pcdhga7
PCDHGB4	Pcdhgb4
PCDHGA8	Pcdhga8
PCDHGB5	Pcdhgb5
PCDHGA9	Pcdhga9
PCDHGB6	Pcdhgb6
PCDHGA10	Pcdhga10
PCDHGB7	Pcdhgb7
PCDHGA11	Pcdhga11
PCDHGA12	Pcdhga12
PCDHGC3	Pcdhgc3
PCDHGC5	Pcdhgc5
HDAC3	Hdac3
RELL2	Rell2
FCHSD1	Fchsd1
ARAP3	Arap3
PCDH1	Pcdh1
PCDH12	Pcdh12
RNF14	Rnf14
GNPDA1	Gnpda1
NDFIP1	Ndfip1
SPRY4	Spry4
FGF1	Fgf1
ARHGAP26	Arhgap26
NR3C1	Nr3c1
YIPF5	Yipf5
KCTD16	Kctd16
PRELID2	Prelid2
GRXCR2	Grxcr2
SH3RF2	Sh3rf2
PLAC8L1	Plac8l1
LARS	Lars
RBM27	Rbm27
POU4F3	Pou4f3
TCERG1	Tcerg1
GPR151	Gpr151
PPP2R2B	Ppp2r2b
STK32A	Stk32a
DPYSL3	Dpysl3
JAKMIP2	Jakmip2
SPINK1	Spink1
SCGB3A2	Scgb3a2
C5orf46	Gm94
SPINK5	Spink5
SPINK14	Spink14
SPINK6	Spink6
SPINK13	Spink13
SPINK7	Spink7
SPINK9	Spink10
FBXO38	Fbxo38
HTR4	Htr4
ADRB2	Adrb2
SH3TC2	Sh3tc2
ABLIM3	Ablim3
AFAP1L1	Afap1l1
GRPEL2	Grpel2
PCYOX1L	Pcyox1l
IL17B	Il17b
CSNK1A1	Csnk1a1
ARHGEF37	Arhgef37
PPARGC1B	Ppargc1b
PDE6A	Pde6a
SLC26A2	Slc26a2
HMGXB3	Hmgxb3
CSF1R	Csf1r
PDGFRB	Pdgfrb
CDX1	Cdx1
SLC6A7	Slc6a7
CAMK2A	Camk2a
ARSI	Arsi
TCOF1	Tcof1
CD74	Cd74
RPS14	Rps14
NDST1	Ndst1
SYNPO	Synpo
MYOZ3	Myoz3
RBM22	Rbm22
DCTN4	Dctn4
SMIM3	Smim3
IRGM	Igtp
GPX3	Gpx3
TNIP1	Tnip1
ANXA6	Anxa6
CCDC69	Ccdc69
GM2A	Gm2a
SLC36A2	Slc36a2
SLC36A1	Slc36a1
FAT2	Fat2
SPARC	Sparc
ATOX1	Atox1
G3BP1	G3bp1
GLRA1	Glra1
NMUR2	Nmur2
GRIA1	Gria1
FAM114A2	Fam114a2
MFAP3	Mfap3
GALNT10	Galnt10
SAP30L	Sap30l
HAND1	Hand1
LARP1	Larp1
CNOT8	Cnot8
MRPL22	Mrpl22
SGCD	Sgcd
PPP1R2B	Ppp1r2
TIMD4	Timd4
HAVCR1	Havcr1
HAVCR2	Havcr2
MED7	Med7
ITK	Itk
FAM71B	Fam71b
CYFIP2	Cyfip2
FNDC9	Fndc9
ADAM19	Adam19
NIPAL4	Nipal4
SOX30	Sox30
C5orf52	4921536K21Rik
THG1L	Thg1l
LSM11	Lsm11
CLINT1	Clint1
EBF1	Ebf1
RNF145	Rnf145
UBLCP1	Ublcp1
IL12B	Il12b
ADRA1B	Adra1b
TTC1	Ttc1
PWWP2A	Pwwp2a
FABP6	Fabp6
CCNJL	Ccnjl
C1QTNF2	C1qtnf2
SLU7	Slu7
PTTG1	Pttg1
ATP10B	Atp10b
GABRB2	Gabrb2
GABRA6	Gabra6
GABRA1	Gabra1
GABRG2	Gabrg2
CCNG1	Ccng1
NUDCD2	Nudcd2
HMMR	Hmmr
MAT2B	Mat2b
TENM2	Tenm2
WWC1	Wwc1
RARS	Rars
FBLL1	Fbll1
PANK3	Pank3
SLIT3	Slit3

## Sheet: Chr6p Genes in Library
Human Gene	Mouse Homolog
DUSP22	Dusp22		Human Genes		482
IRF4	Irf4		Mouse Homologs		500
EXOC2	Exoc2
HUS1B	Hus1b
FOXQ1	Foxq1
FOXF2	Foxf2
FOXC1	Foxc1
GMDS	Gmds
MYLK4	Mylk4
WRNIP1	Wrnip1
SERPINB1	Serpinb1a_Serpinb1b_Serpinb1c
SERPINB9	Serpinb9
SERPINB6	Serpinb6a
NQO2	Nqo2
RIPK1	Ripk1
BPHL	Bphl
TUBB2A	Tubb2a
TUBB2B	Tubb2b
PSMG4	Psmg4
SLC22A23	Slc22a23
PXDC1	Pxdc1
FAM50B	Fam50b
PRPF4B	Prpf4b
FAM217A	Fam217a
ECI2	Eci2
CDYL	Cdyl
RPP40	Rpp40
PPP1R3G	Ppp1r3g
LYRM4	Lyrm4
FARS2	Fars2
NRN1	Nrn1
F13A1	F13a1
LY86	Ly86
RREB1	Rreb1
SSR1	Ssr1
CAGE1	Cage1
RIOK1	Riok1
DSP	Dsp
SNRNP48	Snrnp48
BMP6	Bmp6
TXNDC5	Txndc5
BLOC1S5	Bloc1s5
EEF1E1	Eef1e1
SLC35B3	Slc35b3
TFAP2A	Tfap2a_Tfap2b
GCNT2	Gcnt2
PAK1IP1	Pak1ip1
TMEM14C	Tmem14c
MAK	Mak
GCM2	Gcm2
SYCP2L	Sycp2l
ELOVL2	Elovl2
SMIM13	Smim13
ERVFRD-1	Syna_Synb
NEDD9	Nedd9
TMEM170B	Tmem170b
ADTRP	Adtrp
HIVEP1	Hivep1
EDN1	Edn1
PHACTR1	Phactr1
TBC1D7	Tbc1d7
GFOD1	Gfod1
SIRT5	Sirt5
NOL7	Nol7
RANBP9	Ranbp9
MCUR1	Mcur1
RNF182	Rnf182
CD83	Cd83
JARID2	Jarid2
DTNBP1	Dtnbp1
MYLIP	Mylip
GMPR	Gmpr
ATXN1	Atxn1
STMND1	Stmnd1
RBM24	Rbm24
CAP2	Cap2
NUP153	Nup153
KIF13A	Kif13a
NHLRC1	Nhlrc1
TPMT	Tpmt
KDM1B	Kdm1b
DEK	Dek
RNF144B	Rnf144b
ID4	Id4
MBOAT1	Mboat1
E2F3	E2f3
CDKAL1	Cdkal1
SOX4	Sox4
PRL	Prl
HDGFL1	Hdgfl1
NRSN1	Nrsn1
DCDC2	Dcdc2a
MRS2	Mrs2
GPLD1	Gpld1
ALDH5A1	Aldh5a1
KIAA0319	D130043K22Rik
TDP2	Tdp2
ACOT13	Acot13
C6orf62	BC005537
GMNN	Gmnn
SCGN	Scgn
SLC17A4	Slc17a4
SLC17A1	Slc17a1
SLC17A3	Slc17a3
SLC17A2	Slc17a2
TRIM38	Trim38
H3C1	Hist1h3g
H3C2	Hist1h3g
H2AC4	Hist1h2ae
H3C3	Hist1h3g
HFE	Hfe
H2BC5	Hist1h2bc_Hist3h2ba
H2BC6	Hist1h2bc
H4C5	Hist1h4n
H2BC8	Hist1h2bc
H2AC8	Hist1h2ae
H3C8	Hist1h3g
H2BC10	Hist1h2bc
BTN2A2	Btn2a2
BTN3A3	Btnl4
BTN1A1	Btn1a1
ABT1	Abt1
ZNF322	Zfp322a
PRSS16	Prss16
POM121L2	Pom121l2
ZNF184	Zfp184
H3C10	Hist1h3g
H2AC16	Hist1h2ae
H3C11	Hist1h3g
H4C13	Hist1h4n
H3C12	Hist1h3g
H2BC17	Hist1h2bp
OR2B2	Olfr1359
ZKSCAN8	Zkscan8
ZKSCAN4	Zkscan4
NKAPL	Nkapl
ZSCAN26	Zscan26
PGBD1	Pgbd1
ZKSCAN3	Zkscan3
ZSCAN12	Zscan12
GPX6	Gpx6
GPX5	Gpx5
TRIM27	Trim27
OR2J1	Olfr137
OR2J3	Olfr137
OR2J2	Olfr137
OR12D3	Olfr109
OR11A1	Olfr96
MAS1L	Mrgpra9
OR2I1P	Olfr94
UBD	Ubd
GABBR1	Gabbr1
MOG	Mog
ZFP57	Zfp57
HLA-F	H2-D1_H2-K1_H2-M10.1_H2-M10.2_H2-M10.4_H2-M10.6_H2-M11_H2-M2_H2-M5_H2-Q1_H2-Q10_H2-Q2_H2-Q6_H2-Q7_H2-T22
HLA-G	H2-D1_H2-K1_H2-M10.1_H2-M10.2_H2-M10.4_H2-M10.6_H2-M11_H2-M2_H2-M3_H2-M5_H2-Q1_H2-Q10_H2-Q2_H2-Q6_H2-Q7_H2-T22
HLA-A	H2-D1_H2-K1_H2-Q1_H2-Q10_H2-Q2_H2-Q4_H2-Q6_H2-Q7
PPP1R11	Ppp1r11
RNF39	Rnf39
TRIM31	Trim31
TRIM40	Trim40
TRIM10	Trim10
TRIM15	Trim15
TRIM26	Trim26
TRIM39	Trim39
RPP21	Rpp21
HLA-E	H2-D1_H2-K1_H2-M1_H2-M10.1_H2-M10.2_H2-M10.3_H2-M10.4_H2-M10.5_H2-M10.6_H2-M11_H2-M2_H2-M5_H2-M9_H2-Q1_H2-Q10_H2-Q2_H2-Q4_H2-Q6_H2-Q7_H2-T22_H2-T23_H2-T3
GNL1	Gnl1
PRR3	Prr3
ABCF1	Abcf1
PPP1R10	Ppp1r10
MRPS18B	Mrps18b
ATAT1	Atat1
DHX16	Dhx16
PPP1R18	Ppp1r18
NRM	Nrm
MDC1	Mdc1
FLOT1	Flot1
IER3	Ier3
DDR1	Ddr1
GTF2H4	Gtf2h4
VARS2	Vars2
SFTA2	Sfta2
MUC21	Gm9573
C6orf15	2300002M23Rik
CDSN	Cdsn
PSORS1C2	Psors1c2
CCHCR1	Cchcr1
TCF19	Tcf19
POU5F1	Pou5f1
HLA-C	H2-D1_H2-K1_H2-M1_H2-M10.1_H2-M10.2_H2-M10.3_H2-M10.4_H2-M10.5_H2-M10.6_H2-M11_H2-M2_H2-M5_H2-M9_H2-Q1_H2-Q10_H2-Q2_H2-Q4_H2-Q6_H2-Q7_H2-T22_H2-T3
HLA-B	H2-D1_H2-K1_H2-M1_H2-M10.1_H2-M10.2_H2-M10.3_H2-M10.4_H2-M10.5_H2-M10.6_H2-M11_H2-M2_H2-M5_H2-M9_H2-Q1_H2-Q10_H2-Q2_H2-Q4_H2-Q6_H2-Q7_H2-T22_H2-T3
MICA	Mill2
MICB	Mill2
DDX39B	Ddx39b
ATP6V1G2	Atp6v1g2
NFKBIL1	Nfkbil1
LTA	Lta
TNF	Tnf
LTB	Ltb
LST1	Lst1
AIF1	Aif1
PRRC2A	Prrc2a
BAG6	Bag6
APOM	Apom
C6orf47	D17H6S53E
GPANK1	Gpank1
CSNK2B	Csnk2b
LY6G5B	Ly6g5b
LY6G5C	Ly6g5c
ABHD16A	Abhd16a
LY6G6F	Ly6g6f
LY6G6E	Ly6g6e
LY6G6D	Ly6g6d
LY6G6C	Ly6g6c
DDAH2	Ddah2
CLIC1	Clic1
MSH5	Msh5
SAPCD1	Sapcd1
VWA7	Vwa7
VARS1	Vars
LSM2	Lsm2
HSPA1L	Hspa1l
HSPA1A	Hspa1a
HSPA1B	Hspa1b
NEU1	Neu1
SLC44A4	Slc44a4
EHMT2	Ehmt2
C2	C2
ZBTB12	Zbtb12
CFB	Cfb
NELFE	Nelfe
SKIV2L	Skiv2l
DXO	Dxo
STK19	Stk19
C4B	C4b
CYP21A2	Cyp21a1
TNXB	Tnxb
ATF6B	Atf6b
FKBPL	Fkbpl
PRRT1	Prrt1
PPT2	Ppt2
EGFL8	Egfl8
AGPAT1	Agpat1
RNF5	Rnf5
AGER	Ager
PBX2	Pbx2
GPSM3	Gpsm3
NOTCH4	Notch4
TSBP1	BC051142
BTNL2	Btnl2
HLA-DRB5	H2-Eb1_H2-Eb2
HLA-DRB1	H2-Eb1_H2-Eb2
HLA-DQA1	H2-Aa
HLA-DQB1	H2-Ab1
HLA-DQA2	H2-Aa
HLA-DQB2	H2-Ab1
HLA-DOB	H2-Ob
TAP2	Tap2
PSMB8	Psmb8
PSMB9	Psmb9
TAP1	Tap1
HLA-DMB	H2-DMb1_H2-DMb2
BRD2	Brd2
HLA-DOA	H2-Oa
COL11A2	Col11a2
RXRB	Rxrb
SLC39A7	Slc39a7
HSD17B8	H2-Ke6
RING1	Ring1
VPS52	Vps52
RPS18	Rps18
B3GALT4	B3galt4
WDR46	Wdr46
RGL2	Rgl2
TAPBP	Tapbp
ZBTB22	Zbtb22
DAXX	Daxx
KIFC1	Kifc1
PHF1	Phf1
CUTA	Cuta
SYNGAP1	Syngap1
ZBTB9	Zbtb9
BAK1	Bak1
ITPR3	Itpr3
UQCC2	Uqcc2
IP6K3	Ip6k3
LEMD2	Lemd2
GRM4	Grm4
HMGA1	Hmga1
NUDT3	Nudt3
RPS10	Rps10
PACSIN1	Pacsin1
SPDEF	Spdef
SNRPC	Snrpc
UHRF1BP1	Uhrf1bp1
TAF11	Taf11
ANKS1A	Anks1
TCP11	Tcp11
SCUBE3	Scube3
ZNF76	Zfp523
DEF6	Def6
PPARD	Ppard
FANCE	Fance
RPL10A	Rpl10a
TEAD3	Tead3
TULP1	Tulp1
FKBP5	Fkbp5
ARMC12	Armc12
CLPSL1	Clpsl2
CLPS	Clps
LHFPL5	Lhfpl5
SRPK1	Srpk1
SLC26A8	Slc26a8
MAPK14	Mapk14
MAPK13	Mapk13
BRPF3	Brpf3
PNPLA1	Pnpla1
PXT1	Pxt1
KCTD20	Kctd20
STK38	Stk38
SRSF3	Srsf3
CDKN1A	Cdkn1a
RAB44	Rab44
CPNE5	Cpne5
PPIL1	Ppil1
C6orf89	BC004004
PI16	Pi16
MTCH1	Mtch1
FGD2	Fgd2
PIM1	Pim1
TMEM217	Tmem217
TBC1D22B	Tbc1d22b
RNF8	Rnf8
CMTR1	Cmtr1
CCDC167	Ccdc167
MDGA1	Mdga1
ZFAND3	Zfand3
BTBD9	Btbd9
GLO1	Glo1
DNAH8	Dnah8
GLP1R	Glp1r
SAYSD1	Saysd1
KCNK5	Kcnk5
KCNK16	Kcnk16
KIF6	Kif6
DAAM2	Daam2
MOCS1	Mocs1
LRFN2	Lrfn2
UNC5CL	Unc5cl
OARD1	Oard1
TSPO2	Tspo2
APOBEC2	Apobec2
NFYA	Nfya
TREML1	Treml1
TREM2	Trem2
TREML2	Treml2
TREML4	Treml4
TREM1	Trem1
FOXP4	Foxp4
MDFI	Mdfi
TFEB	Tfeb
PGC	Pgc
FRS3	Frs3
PRICKLE4	Prickle4
TOMM6	Tomm6
USP49	Usp49
MED20	Med20
BYSL	Bysl
CCND3	Ccnd3
TAF8	Taf8
C6orf132	AI661453
GUCA1A	Guca1a
GUCA1B	Guca1b
MRPS10	Mrps10
TRERF1	Trerf1
UBR2	Ubr2
PRPH2	Prph2
TBCC	Tbcc
RPL7L1	Rpl7l1
C6orf226	2310039H08Rik
CNPY3	Cnpy3
GNMT	Gnmt
PEX6	Pex6
PPP2R5D	Ppp2r5d
MEA1	Mea1
KLHDC3	Klhdc3
RRP36	Rrp36
CUL7	Cul7
KLC4	Klc4
MRPL2	Mrpl2
PTK7	Ptk7
SRF	Srf
CUL9	Cul9
DNPH1	Dnph1
TTBK1	Ttbk1
SLC22A7	Slc22a7
CRIP3	Crip3
ZNF318	Zfp318
ABCC10	Abcc10
DLK2	Dlk2
TJAP1	Tjap1
LRRC73	Lrrc73
POLR1C	Polr1c
YIPF3	Yipf3
XPO5	Xpo5
POLH	Polh
GTPBP2	Gtpbp2
MAD2L1BP	Mad2l1bp
RSPH9	Rsph9
MRPS18A	Mrps18a
VEGFA	Vegfa
MRPL14	Mrpl14
TMEM63B	Tmem63b
CAPN11	Capn11
SLC29A1	Slc29a1
HSP90AB1	Hsp90ab1
SLC35B2	Slc35b2
NFKBIE	Nfkbie
TMEM151B	Tmem151b
TCTE1	Tcte1
AARS2	Aars2
SPATS1	Spats1
CDC5L	Cdc5l
SUPT3H	Supt3
RUNX2	Runx2
CLIC5	Clic5
ENPP4	Enpp4
ENPP5	Enpp5
RCAN2	Rcan2
CYP39A1	Cyp39a1
SLC25A27	Slc25a27
TDRD6	Tdrd6
PLA2G7	Pla2g7
ANKRD66	Ankrd66
MEP1A	Mep1a
TNFRSF21	Tnfrsf21
CD2AP	Cd2ap
OPN5	Opn5
PTCHD4	Ptchd4
CENPQ	Cenpq
GLYATL3	Glyatl3
C6orf141	9130008F23Rik
RHAG	Rhag
CRISP2	Crisp2
CRISP3	Crisp3
PGK2	Pgk2
CRISP1	Crisp1
DEFB113	Defb18
DEFB110	Defb41_Gm15386
TFAP2D	Tfap2d
PKHD1	Pkhd1
IL17A	Il17a
IL17F	Il17f
MCM3	Mcm3
PAQR8	Paqr8
EFHC1	Efhc1
TRAM2	Tram2
TMEM14A	Tmem14a
GSTA2	Gsta2
GSTA1	Gsta1
GSTA3	Gsta3
GSTA4	Gsta4
FBXO9	Fbxo9
GCM1	Gcm1
ELOVL5	Elovl5
GCLC	Gclc
KLHL31	Klhl31
LRRC1	Lrrc1
MLIP	Mlip
TINAG	Tinag
FAM83B	Fam83b
HCRTR2	Hcrtr2
GFRAL	Gfral
HMGCLL1	Hmgcll1
BMP5	Bmp5
DST	Dst
BEND6	Bend6
ZNF451	Zfp451
BAG2	Bag2
RAB23	Rab23
PRIM2	Prim2

## Sheet: Chr9p Genes in Library
Human Gene	Mouse Homolog
FOXD4	Foxd4		Human Genes		172
CBWD1	Cbwd1		Mouse Homologs		172
DOCK8	Dock8
KANK1	Kank1
DMRT1	Dmrt1
DMRT3	Dmrt3
DMRT2	Dmrt2
SMARCA2	Smarca2
VLDLR	Vldlr
KCNV2	Kcnv2
RFX3	Rfx3
GLIS3	Glis3
SLC1A1	Slc1a1
SPATA6L	4430402I18Rik
CDC37L1	Cdc37l1
AK3	Ak3
RCL1	Rcl1
JAK2	Jak2
INSL6	Insl6
RLN1	Rln1
PLGRKT	Plgrkt
CD274	Cd274
PDCD1LG2	Pdcd1lg2
ERMP1	Ermp1
KIAA2026	9930021J03Rik
MLANA	Mlana
RANBP6	Ranbp6
IL33	Il33
TPD52L3	Trpd52l3
UHRF2	Uhrf2
GLDC	Gldc
KDM4C	Kdm4c
PTPRD	Ptprd
TYRP1	Tyrp1
LURAP1L	Lurap1l
MPDZ	Mpdz
NFIB	Nfib
ZDHHC21	Zdhhc21
CER1	Cer1
FREM1	Frem1
TTC39B	Ttc39b
SNAPC3	Snapc3
PSIP1	Psip1
CCDC171	Ccdc171
BNC2	Bnc2
CNTLN	Cntln
SH3GL2	Sh3gl2
ADAMTSL1	Adamtsl1
RRAGA	Rraga
HAUS6	Haus6
PLIN2	Plin2
DENND4C	Dennd4c
RPS6	Rps6
ACER2	Acer2
SLC24A2	Slc24a2
MLLT3	Mllt3
FOCAD	Focad
IFNB1	Ifnb1
IFNA4	Ifna4
IFNA7	Ifna7
IFNA14	Ifna14
IFNA5	Ifna5
KLHL9	Klhl9
IFNA13	Ifna13
IFNA2	Ifna2
IFNE	Ifne
MTAP	Mtap
CDKN2A	Cdkn2a
CDKN2B	Cdkn2b
DMRTA1	Dmrta1
ELAVL2	Elavl2
IZUMO3	Izumo3
TUSC1	Tusc1
CAAP1	Caap1
PLAA	Plaa
IFT74	Ift74
LRRC19	Lrrc19
TEK	Tek
EQTN	Eqtn
MOB3B	Mob3b
IFNK	Ifnk
LINGO2	Lingo2
ACO1	Aco1
DDX58	Ddx58
TOPORS	Topors
NDUFB6	Ndufb6
TAF1L	Taf1
TMEM215	Tmem215
APTX	Aptx
DNAJA1	Dnaja1
SMU1	Smu1
B4GALT1	B4galt1
SPINK4	Spink4
BAG1	Bag1
CHMP5	Chmp5
NFX1	Nfx1
AQP7	Aqp7
AQP3	Aqp3
NOL6	Nol6
PRSS3	Prss3
UBE2R2	Ube2r2
UBAP2	Ubap2
DCAF12	Dcaf12
UBAP1	Ubap1
KIF24	Kif24
NUDT2	Nudt2
MYORG	AI464131
C9orf24	1110017D15Rik
FAM219A	Fam219a
DNAI1	Dnaic1
ENHO	Enho
CNTFR	Cntfr
RPP25L	Rpp25l
DCTN3	Dctn3
ARID3C	Arid3c
SIGMAR1	Sigmar1
GALT	Galt
IL11RA	Il11ra2
CCL27	Ccl27a
DNAJB5	Dnajb5
C9orf131	1700022I11Rik
VCP	Vcp
FANCG	Fancg
PIGO	Pigo
STOML2	Stoml2
FAM214B	Fam214b
UNC13B	Unc13b
RUSC2	Rusc2
FAM166B	Fam166b
TESK1	Tesk1
CD72	Cd72
SIT1	Sit1
CCDC107	Ccdc107
ARHGEF39	Arhgef39
CA9	Car9
TPM2	Tpm2
TLN1	Tln1
CREB3	Creb3
GBA2	Gba2
RGP1	Rgp1
MSMP	Msmp
NPR2	Npr2
SPAG8	Spag8
HINT2	Hint2
TMEM8B	Tmem8b
FAM221B	Fam221b
OR13J1	Olfr71
HRCT1	Hrct1
RECK	Reck
GLIPR2	Glipr2
CCIN	Ccin
CLTA	Clta
GNE	Gne
RNF38	Rnf38
MELK	Melk
PAX5	Pax5
ZCCHC7	Zcchc7
GRHPR	Grhpr
ZBTB5	Zbtb5
POLR1E	Polr1e
FBXO10	Fbxo10
TOMM5	Tomm5
FRMPD1	Frmpd1
TRMT10B	Trmt10b
EXOSC3	Exosc3
DCAF10	Dcaf10
SLC25A51	Slc25a51
SHB	Shb
ALDH1B1	Aldh1b1
IGFBPL1	Igfbpl1
CNTNAP3	Cntnap3
SPATA31A1	Spata31

## Sheet: Chr10p Genes in Library
Human Gene	Mouse Homolog
ZMYND11	Zmynd11		Human Genes		134
LARP4B	Larp4b		Mouse Homologs		135
GTPBP4	Gtpbp4
IDI2	Idi2
IDI1	Idi1
WDR37	Wdr37
ADARB2	Adarb2
PFKP	Pfkp
PITRM1	Pitrm1
KLF6	Klf6
AKR1E2	Akr1cl
AKR1C1	Akr1c14
AKR1C2	Akr1c6
AKR1C3	Akr1c18_Akr1c20
AKR1C8P	Akr1c6
AKR1C4	Akr1c21
UCN3	Ucn3
TUBAL3	Tubal3
NET1	Net1
CALML5	Calm4
CALML3	Calml3
ASB13	Asb13
GDI2	Gdi2
ANKRD16	Ankrd16
IL15RA	Il15ra
IL2RA	Il2ra
RBM17	Rbm17
PFKFB3	Pfkfb3
PRKCQ	Prkcq
SFMBT2	Sfmbt2
ITIH5	Itih5
ITIH2	Itih2
KIN	Kin
ATP5F1C	Atp5c1
TAF3	Taf3
GATA3	Gata3
CELF2	Celf2
USP6NL	Usp6nl
ECHDC3	Echdc3
PROSER2	Proser2
UPF2	Upf2
DHTKD1	Dhtkd1
SEC61A2	Sec61a2
NUDT5	Nudt5
CDC123	Cdc123
CAMK1D	Camk1d
CCDC3	Ccdc3
OPTN	Optn
MCM10	Mcm10
UCMA	Ucma
PHYH	Phyh
SEPHS1	Sephs1
BEND7	Bend7
PRPF18	Prpf18
FRMD4A	Frmd4a
FAM107B	Fam107b
CDNF	Cdnf
HSPA14	Hspa14
SUV39H2	Suv39h2
DCLRE1C	Dclre1c
MEIG1	Meig1
OLAH	Olah
ACBD7	Acbd7
RPP38	Rpp38
NMT2	Nmt2
FAM171A1	Fam171a1
ITGA8	Itga8
PTER	Pter
C1QL3	C1ql3
RSU1	Rsu1
CUBN	Cubn
TRDMT1	Trdmt1
VIM	Vim
ST8SIA6	St8sia6
STAM	Stam
TMEM236	Tmem236
MRC1	Mrc1
SLC39A12	Slc39a12
CACNB2	Cacnb2
NSUN6	Nsun6
ARL5B	Arl5b
PLXDC2	Plxdc2
NEBL	Nebl
SKIDA1	Skida1
MLLT10	Mllt10
DNAJC1	Dnajc1
COMMD3	Commd3
BMI1	Bmi1
SPAG6	Spag6
PIP4K2A	Pip4k2a
ARMC3	Armc3
MSRB2	Msrb2
PTF1A	Ptf1a
C10orf67	4921504E06Rik
OTUD1	Otud1
KIAA1217	Etl4
ARHGAP21	Arhgap21
ENKUR	Enkur
THNSL1	Thnsl1
GPR158	Gpr158
MYO3A	Myo3a
GAD2	Gad2
APBB1IP	Apbb1ip
PDSS1	Pdss1
ABI1	Abi1
ANKRD26	Ankrd26
YME1L1	Yme1l1
MASTL	Mastl
ACBD5	Acbd5
RAB18	Rab18
MKX	Mkx
ARMC4	Armc4
MPP7	Mpp7
WAC	Wac
BAMBI	Bambi
LYZL1	Lyzl1
SVIL	Svil
MTPAP	Mtpap
MAP3K8	Map3k8
ZNF438	Zfp438
ARHGAP12	Arhgap12
KIF5B	Kif5b
EPC1	Epc1
CCDC7	Ccdc7
ITGB1	Itgb1
NRP1	Nrp1
PARD3	Pard3
CUL2	Cul2
CREM	Crem
CCNY	Ccny
GJD4	Gjd4
FZD8	Fzd8
ZNF248	Zfp248
ZNF25	Zfp9

## Sheet: Chr12p Genes in Library
Human Gene	Mouse Homolog
IQSEC3	Iqsec3		Human Genes		231
SLC6A12	Slc6a12		Mouse Homologs		248
SLC6A13	Slc6a13
KDM5A	Kdm5a
CCDC77	Ccdc77
B4GALNT3	B4galnt3
NINJ2	Ninj2
WNK1	Wnk1
RAD52	Rad52
ERC1	Erc1
WNT5B	Wnt5b
FBXL14	Fbxl14
ADIPOR2	Adipor2
LRTM2	Lrtm2
DCP1B	Dcp1b
CACNA1C	Cacna1c
FKBP4	Fkbp4
ITFG2	Itfg2
NRIP2	Nrip2
FOXM1	Foxm1
RHNO1	Rhno1
TULP3	Tulp3
TEAD4	Tead4
TSPAN9	Tspan9
PRMT8	Prmt8
PARP11	Parp11
CCND2	Ccnd2
FGF23	Fgf23
FGF6	Fgf6
C12orf4	D6Wsu163e
RAD51AP1	Rad51ap1
DYRK4	Dyrk4
AKAP3	Akap3
NDUFA9	Ndufa9
KCNA6	Kcna6
KCNA1	Kcna1
KCNA5	Kcna5
NTF3	Ntf3
ANO2	Ano2
VWF	Vwf
CD9	Cd9
PLEKHG6	Plekhg6
TNFRSF1A	Tnfrsf1a
SCNN1A	Scnn1a
LTBR	Ltbr
CD27	Cd27
TAPBPL	Tapbpl
VAMP1	Vamp1
MRPL51	Mrpl51
NCAPD2	Ncapd2
GAPDH	Gapdh
IFFO1	Iffo1
NOP2	Nop2
CHD4	Chd4
LPAR5	Lpar5
ACRBP	Acrbp
ING4	Ing4
ZNF384	Zfp384
PIANP	Pianp
COPS7A	Cops7a
MLF2	Mlf2
PTMS	Ptms
LAG3	Lag3
CD4	Cd4
GPR162	Gpr162
GNB3	Gnb3
CDCA3	Cdca3
USP5	Usp5
TPI1	Tpi1
SPSB2	Spsb2
LRRC23	Lrrc23
ENO2	Eno2
ATN1	Atn1
PTPN6	Ptpn6
PHB2	Phb2
EMG1	Emg1
LPCAT3	Lpcat3
C1S	C1s
C1R	C1ra
C1RL	C1rl
CLSTN3	Clstn3
PEX5	Pex5
ACSM4	Acsm4
CD163L1	Cd163l1
CD163	Cd163
APOBEC1	Apobec1
GDF3	Gdf3
DPPA3	Dppa3
NANOG	Nanog
SLC2A3	Slc2a3
FOXJ2	Foxj2
C3AR1	C3ar1
NECAP1	Necap1
CLEC4A	Clec4a1_Clec4a3
CLEC4D	Clec4d
CLEC4E	Clec4e
AICDA	Aicda
MFAP5	Mfap5
RIMKLB	Rimklb
PHC1	Phc1
M6PR	M6pr
KLRG1	Klrg1
A2M	A2m
PZP	Pzp
KLRB1	Klrb1
CLEC2D	Clec2d
CD69	Cd69
CLEC12A	Clec12a
CLEC1B	Clec1b
CLEC12B	Clec12b
CLEC9A	Clec9a
CLEC1A	Clec1a
OLR1	Olr1
TMEM52B	Tmem52b
GABARAPL1	Gabarapl1
KLRD1	Klrd1
KLRK1	Klrk1
KLRC4	4922502D21Rik
KLRC3	Klrc3
KLRC2	Klrc2_Klri
KLRC1	Klrc1
EIF2S3B	Eif2s3x
MAGOHB	Magohb
STYK1	Styk1
YBX3	Ybx3
TAS2R7	Tas2r130
PRH1	Prh1
TAS2R10	Tas2r104_Tas2r105_Tas2r106_Tas2r107_Tas2r114
TAS2R13	Tas2r102_Tas2r121_Tas2r124
TAS2R14	Tas2r103_Tas2r109_Tas2r110_Tas2r115_Tas2r116_Tas2r117_Tas2r123_Tas2r125_Tas2r129_Tas2r140
TAS2R19	Tas2r120
TAS2R31	Tas2r136
TAS2R42	Tas2r131
PRB1	Prb1
ETV6	Etv6
BCL2L14	Bcl2l14
LRP6	Lrp6
MANSC1	Mansc1
DUSP16	Dusp16
CREBL2	Crebl2
GPR19	Gpr19
CDKN1B	Cdkn1b
APOLD1	Apold1
DDX47	Ddx47
GPRC5A	Gprc5a
GPRC5D	Gprc5d
HEBP1	Hebp1
GSG1	Gsg1
EMP1	Emp1
GRIN2B	Grin2b
ATF7IP	Atf7ip
PLBD1	Plbd1
GUCY2C	Gucy2c
HIST4H4	Hist4h4
H2AFJ	H2afj
WBP11	Wbp11
C12orf60	BC049715
SMCO3	Smco3
ART4	Art4
MGP	Mgp
ERP27	Erp27
ARHGDIB	Arhgdib
PDE6H	Pde6h
RERG	Rerg
PTPRO	Ptpro
EPS8	Eps8
STRAP	Strap
DERA	Dera
SLC15A5	Slc15a5
MGST1	Mgst1
LMO3	Lmo3
RERGL	Rergl
PIK3C2G	Pik3c2g
PLCZ1	Plcz1
CAPZA3	Capza3
PLEKHA5	Plekha5
AEBP2	Aebp2
PDE3A	Pde3a
SLCO1C1	Slco1c1
SLCO1B1	Slco1b2
SLCO1A2	Slco1a5
IAPP	Iapp
PYROXD1	Pyroxd1
RECQL	Recql
GOLT1B	Golt1b
GYS2	Gys2
LDHB	Ldhb
KCNJ8	Kcnj8
ABCC9	Abcc9
CMAS	Cmas
ST8SIA1	St8sia1
C2CD5	C2cd5
ETNK1	Etnk1
SOX5	Sox5
BCAT1	Bcat1
LRMP	Lrmp
CASC1	Casc1
KRAS	Kras
RASSF8	Rassf8
BHLHE41	Bhlhe41
SSPN	Sspn
ITPR2	Itpr2
FGFR1OP2	Fgfr1op2
TM7SF3	Tm7sf3
MED21	Med21
C12orf71	1700034J05Rik
STK38L	Stk38l
ARNTL2	Arntl2
SMCO2	Smco2
PPFIBP1	Ppfibp1
REP15	Rep15
MRPS35	Mrps35
MANSC4	Mansc4
KLHL42	Klhl42
PTHLH	Pthlh
CCDC91	Ccdc91
FAR2	Far2
ERGIC2	Ergic2
TMTC1	Tmtc1
IPO8	Ipo8
CAPRIN2	Caprin2
TSPAN11	Tspan11
DDX11	Ddx11
DENND5B	Dennd5b
AMN1	Amn1
BICD1	Bicd1
FGD4	Fgd4
DNM1L	Dnm1l
YARS2	Yars2
PKP2	Pkp2
SYT10	Syt10

## Sheet: Chr12q Genes in Library
Human Gene	Mouse Homolog
ALG10B	Alg10b		Human Genes		648
CPNE8	Cpne8		Mouse Homologs		649
KIF21A	Kif21a
ABCD2	Abcd2
SLC2A13	Slc2a13
LRRK2	Lrrk2
MUC19	Muc19
CNTN1	Cntn1
PDZRN4	Pdzrn4
GXYLT1	Gxylt1
YAF2	Yaf2
ZCRB1	Zcrb1
PRICKLE1	Prickle1
ADAMTS20	Adamts20
PUS7L	Pus7l
IRAK4	Irak4
TWF1	Twf1
TMEM117	Tmem117
NELL2	Nell2
DBX2	Dbx2
ANO6	Ano6
ARID2	Arid2
SCAF11	Scaf11
SLC38A1	Slc38a1
SLC38A2	Slc38a2
SLC38A4	Slc38a4
AMIGO2	Amigo2
PCED1B	Pced1b
RPAP3	Rpap3
ENDOU	Endou
RAPGEF3	Rapgef3
SLC48A1	Slc48a1
HDAC7	Hdac7
VDR	Vdr
TMEM106C	Tmem106c
COL2A1	Col2a1
SENP1	Senp1
PFKM	Pfkm
ASB8	Asb8
CCDC184	Ccdc184
ZNF641	Zfp641
ANP32D	Anp32a
LALBA	Lalba
KANSL2	Kansl2
CCNT1	Ccnt1
ADCY6	Adcy6
CACNB3	Cacnb3
DDX23	Ddx23
DDN	Ddn
PPHLN1	Pphln1
RND1	Rnd1
CCDC65	Ccdc65
FKBP11	Fkbp11
ARF3	Arf3
WNT10B	Wnt10b
WNT1	Wnt1
PRKAG1	Prkag1
KMT2D	Kmt2d
RHEBL1	Rhebl1
DHH	Dhh
LMBR1L	Lmbr1l
TUBA1B	Tuba1b
TUBA1A	Tuba1a
TUBA1C	Tuba1c
PRPH	Prph
TROAP	Troap
C1QL4	C1ql4
DNAJC22	Dnajc22
SPATS2	Spats2
KCNH3	Kcnh3
MCRS1	Mcrs1
PRPF40B	Prpf40b
FAM186B	Fam186b
FMNL3	Fmnl3
TMBIM6	Tmbim6
NCKAP5L	Nckap5l
BCDIN3D	Bcdin3d
FAIM2	Faim2
AQP2	Aqp2
AQP5	Aqp5
AQP6	Aqp6
RACGAP1	Racgap1
ASIC1	Asic1
SMARCD1	Smarcd1
GPD1	Gpd1
COX14	Cox14
CERS5	Cers5
LIMA1	Lima1
LARP4	Larp4
DIP2B	Dip2b
ATF1	Atf1
TMPRSS12	Tmprss12
METTL7A	Mettl7a1
SLC11A2	Slc11a2
LETMD1	Letmd1
CSRNP2	Csrnp2
TFCP2	Tfcp2
POU6F1	Pou6f1
DAZAP2	Dazap2
SMAGP	Smagp
BIN2	Bin2
CELA1	Cela1
GALNT6	Galnt6
SLC4A8	Slc4a8
SCN8A	Scn8a
FIGNL2	Fignl2
ANKRD33	Ankrd33
ACVRL1	Acvrl1
ACVR1B	Acvr1b
NR4A1	Nr4a1
ATG101	Atg101
KRT80	Krt80
KRT7	Krt7
KRT86	Krt86
KRT81	Krt81
KRT83	Krt83
KRT85	Krt85
KRT84	Krt84
KRT82	Krt82
KRT75	Krt75
KRT6B	Krt6b
KRT6A	Krt6a
KRT5	Krt5
KRT71	Krt71
KRT72	Krt72
KRT73	Krt73
KRT2	Krt2
KRT1	Krt1
KRT77	Krt77
KRT76	Krt76
KRT4	Krt4
KRT79	Krt79
KRT78	Krt78
KRT8	Krt8
KRT18	Krt18
EIF4B	Eif4b
TNS2	Tns2
SPRYD3	Spryd3
IGFBP6	Igfbp6
SOAT2	Soat2
CSAD	Csad
ZNF740	Zfp740
ITGB7	Itgb7
RARG	Rarg
MFSD5	Mfsd5
ESPL1	Espl1
PFDN5	Pfdn5
AAAS	Aaas
SP7	Sp7
SP1	Sp1
AMHR2	Amhr2
PRR13	Prr13
PCBP2	Pcbp2
MAP3K12	Map3k12
TARBP2	Tarbp2
NPFF	Npff
ATF7	Atf7
ATP5MC2	Atp5g2
CALCOCO1	Calcoco1
HOXC13	Hoxc13
HOXC12	Hoxc12
HOXC11	Hoxc11
HOXC10	Hoxc10
HOXC6	Hoxc6
HOXC9	Hoxc9
HOXC8	Hoxc8
HOXC4	Hoxc4
HOXC5	Hoxc5
SMUG1	Smug1
CBX5	Cbx5
HNRNPA1	Hnrnpa1
NFE2	Nfe2
COPZ1	Copz1
GPR84	Gpr84
ZNF385A	Zfp385a
ITGA5	Itga5
GTSF1	Gtsf1
NCKAP1L	Nckap1l
PDE1B	Pde1b
PPP1R1A	Ppp1r1a
DCD	Dcn
MUCL1	Mucl1
TESPA1	Tespa1
NEUROD4	Neurod4
OR2AP1	Olfr765_Olfr767
METTL7B	Mettl7b
ITGA7	Itga7
BLOC1S1	Bloc1s1
RDH5	Rdh5
CD63	Cd63
GDF11	Gdf11
SARNP	Sarnp
ORMDL2	Ormdl2
DNAJC14	Dnajc14
MMP19	Mmp19
DGKA	Dgka
PMEL	Pmel
CDK2	Cdk2
RAB5B	Rab5b
SUOX	Suox
IKZF4	Ikzf4
RPS26	Rps26
ERBB3	Erbb3
PA2G4	Pa2g4
RPL41	Rpl41
ZC3H10	Zc3h10
ESYT1	Esyt1
MYL6B	Myl6b
MYL6	Myl6
SMARCC2	Smarcc2
RNF41	Rnf41
NABP2	Nabp2
SLC39A5	Slc39a5
ANKRD52	Ankrd52
COQ10A	Coq10a
CS	Cs
CNPY2	Cnpy2
PAN2	Pan2
IL23A	Il23a
STAT2	Stat2
APOF	Apof
TIMELESS	Timeless
MIP	Mip
SPRYD4	Spryd4
GLS2	Gls2
RBMS2	Rbms2
BAZ2A	Baz2a
ATP5F1B	Atp5b
PTGES3	Ptges3
NACA	Naca
PRIM1	Prim1
HSD17B6	Hsd17b6
SDR9C7	Sdr9c7
RDH16	Rdh16
GPR182	Gpr182
ZBTB39	Zbtb39
TAC3	Tac2
MYO1A	Myo1a
NAB2	Nab2
STAT6	Stat6
LRP1	Lrp1
NXPH4	Nxph4
SHMT2	Shmt2
NDUFA4L2	Ndufa4l2
STAC3	Stac3
R3HDM2	R3hdm2
INHBC	Inhbc
INHBE	Inhbe
GLI1	Gli1
ARHGAP9	Arhgap9
DDIT3	Ddit3
MBD6	Mbd6
DCTN2	Dctn2
KIF5A	Kif5a
PIP4K2C	Pip4k2c
DTX3	Dtx3
ARHGEF25	Arhgef25
SLC26A10	Slc26a10
B4GALNT1	B4galnt1
OS9	Os9
AGAP2	Agap2
TSPAN31	Tspan31
CDK4	Cdk4
CYP27B1	Cyp27b1
METTL1	Mettl1
TSFM	Tsfm
AVIL	Avil
CTDSP2	Ctdsp2
LRIG3	Lrig3
SLC16A7	Slc16a7
USP15	Usp15
MON2	Mon2
PPM1H	Ppm1h
AVPR1A	Avpr1a
DPY19L2	Dpy19l2
SRGAP1	Srgap1
C12orf56	D930020B18Rik
XPOT	Xpot
TBK1	Tbk1
RASSF3	Rassf3
GNS	Gns
TBC1D30	Tbc1d30
WIF1	Wif1
LEMD3	Lemd3
MSRB3	Msrb3
HMGA2	Hmga2
LLPH	Llph
TMBIM4	Tmbim4
IRAK3	Irak3
HELB	Helb
GRIP1	Grip1
CAND1	Cand1
DYRK2	Dyrk2
IFNG	Ifng
IL26	Il31
IL22	Il22
MDM1	Mdm1
RAP1B	Rap1b
NUP107	Nup107
SLC35E3	Slc35e3
MDM2	Mdm2
CPM	Cpm
CPSF6	Cpsf6
LYZ	Lyz1
YEATS4	Yeats4
FRS2	Frs2
CCT2	Cct2
LRRC10	Lrrc10
BEST3	Best3
RAB3IP	Rab3ip
MYRFL	Myrfl
CNOT2	Cnot2
KCNMB4	Kcnmb4
PTPRB	Ptprb
PTPRR	Ptprr
TSPAN8	Tspan8
LGR5	Lgr5
ZFC3H1	Zfc3h1
THAP2	Thap2
TMEM19	Tmem19
RAB21	Rab21
TBC1D15	Tbc1d15
TPH2	Tph2
TRHDE	Trhde
ATXN7L3B	Atxn7l3b
KCNC2	Kcnc2
CAPS2	Caps2
GLIPR1L1	Glipr1l1
GLIPR1L2	Glipr1l2
GLIPR1	Glipr1
KRR1	Krr1
PHLDA1	Phlda1
NAP1L1	Nap1l1
BBS10	Bbs10
OSBPL8	Osbpl8
ZDHHC17	Zdhhc17
CSRP2	Csrp2
E2F7	E2f7
NAV3	Nav3
SYT1	Syt1
PAWR	Pawr
PPP1R12A	Ppp1r12a
OTOGL	Otogl
PTPRQ	Ptprq
MYF6	Myf6
MYF5	Myf5
LIN7A	Lin7a
ACSS3	Acss3
PPFIA2	Ppfia2
CCDC59	Ccdc59
METTL25	Mettl25
TMTC2	Tmtc2
SLC6A15	Slc6a15
LRRIQ1	Lrriq1
ALX1	Alx1
RASSF9	Rassf9
NTS	Nts
MGAT4C	Mgat4c
C12orf50	1700017N19Rik
CEP290	Cep290
TMTC3	Tmtc3
KITLG	Kitl
DUSP6	Dusp6
POC1B	Poc1b
GALNT4	Galnt4
ATP2B1	Atp2b1
CCER1	Ccer1
EPYC	Epyc
KERA	Kera
LUM	Lum
BTG1	Btg1
EEA1	Eea1
NUDT4	Nudt4
UBE2N	Ube2n
MRPL42	Mrpl42
SOCS2	Socs2
CRADD	Cradd
PLXNC1	Plxnc1
CEP83	Cep83
TMCC3	Tmcc3
NDUFA12	Ndufa12
NR2C1	Nr2c1
FGD6	Fgd6
VEZT	Vezt
METAP2	Metap2
USP44	Usp44
NTN4	Ntn4
SNRPF	Snrpf
CCDC38	Ccdc38
AMDHD1	Amdhd1
HAL	Hal
LTA4H	Lta4h
ELK3	Elk3
CDK17	Cdk17
NEDD1	Nedd1
TMPO	Tmpo
SLC25A3	Slc25a3
IKBIP	Ikbip
APAF1	Apaf1
ANKS1B	Anks1b
UHRF1BP1L	Uhrf1bp1l
ACTR6	Actr6
SCYL2	Scyl2
SLC17A8	Slc17a8
NR1H4	Nr1h4
GAS2L3	Gas2l3
ANO4	Ano4
SLC5A8	Slc5a8
UTP20	Utp20
ARL1	Arl1
SPIC	Spic
MYBPC1	Mybpc1
CHPT1	Chpt1
SYCP3	Sycp3
GNPTAB	Gnptab
DRAM1	Dram1
NUP37	Nup37
PARPBP	Parpbp
PMCH	Pmch
IGF1	Igf1
PAH	Pah
ASCL1	Ascl1
C12orf42	1700113H08Rik
STAB2	Stab2
NT5DC3	Nt5dc3
HSP90B1	Hsp90b1
C12orf73	1190007I07Rik
TDG	Tdg
GLT8D2	Glt8d2
HCFC2	Hcfc2
NFYB	Nfyb
TXNRD1	Txnrd1
EID3	Eid3
CHST11	Chst11
SLC41A2	Slc41a2
ALDH1L2	Aldh1l2
APPL2	Appl2
C12orf75	1500009L16Rik
NUAK1	Nuak1
CKAP4	Ckap4
TCP11L2	Tcp11l2
POLR3B	Polr3b
RFX4	Rfx4
RIC8B	Ric8b
TMEM263	Tmem263
MTERF2	Mterf2
CRY1	Cry1
BTBD11	Btbd11
PWP1	Pwp1
PRDM4	Prdm4
ASCL4	Ascl4
WSCD2	Wscd2
CMKLR1	Cmklr1
FICD	Ficd
SART3	Sart3
ISCU	Iscu
TMEM119	Tmem119
SELPLG	Selplg
CORO1C	Coro1c
SSH1	Ssh1
DAO	Dao
SVOP	Svop
USP30	Usp30
ALKBH2	Alkbh2
UNG	Ung
ACACB	Acacb
FOXN4	Foxn4
MYO1H	Myo1h
KCTD10	Kctd10
UBE3B	Ube3b
MMAB	Mmab
MVK	Mvk
FAM222A	Fam222a
TRPV4	Trpv4
GLTP	Gltp
TCHP	Tchp
GIT2	Git2
ANKRD13A	Ankrd13a
IFT81	Ift81
ATP2A2	Atp2a2
ANAPC7	Anapc7
ARPC3	Arpc3
GPN3	Gpn3
FAM216A	Fam216a
VPS29	Vps29
RAD9B	Rad9b
PPTC7	Pptc7
TCTN1	Tctn1
HVCN1	Hvcn1
PPP1CC	Ppp1cc
CCDC63	Ccdc63
MYL2	Myl2
CUX2	Cux2
SH2B3	Sh2b3
ATXN2	Atxn2
BRAP	Brap
ACAD10	Acad10
ALDH2	Aldh2
MAPKAPK5	Mapkapk5
TMEM116	Tmem116
ERP29	Erp29
NAA25	Naa25
TRAFD1	Trafd1
RPL6	Rpl6
PTPN11	Ptpn11
RPH3A	Rph3a
OAS1	Oas1b
OAS3	Oas3
OAS2	Oas2
DTX1	Dtx1
RASAL1	Rasal1
DDX54	Ddx54
RITA1	Rita1
IQCD	Iqcd
TPCN1	Tpcn1
SLC8B1	Slc8b1
PLBD2	Plbd2
SDS	Sds
SDSL	Sdsl
LHX5	Lhx5
RBM19	Rbm19
TBX5	Tbx5
TBX3	Tbx3
MED13L	Med13l
RNFT2	Rnft2
HRK	Hrk
FBXW8	Fbxw8
TESC	Tesc
FBXO21	Fbxo21
NOS1	Nos1
KSR2	Ksr2
RFC5	Rfc5
WSB2	Wsb2
VSIG10	Vsig10
PEBP1	Pebp1
TAOK3	Taok3
SUDS3	Suds3
SRRM4	Srrm4
HSPB8	Hspb8
CCDC60	Ccdc60
TMEM233	Tmem233
PRKAB1	Prkab1
CIT	Cit
RAB35	Rab35
RPLP0	Rplp0
PXN	Pxn
SIRT4	Sirt4
PLA2G1B	Pla2g1b
MSI1	Msi1
COX6A1	Cox6a1
TRIAP1	Triap1
GATC	Gatc
SRSF9	Srsf9
DYNLL1	Dynll1
COQ5	Coq5
RNF10	Rnf10
POP5	Pop5
CABP1	Cabp1
MLEC	Mlec
UNC119B	Unc119b
ACADS	Acads
SPPL3	Sppl3
HNF1A	Hnf1a
C12orf43	2210016L21Rik
OASL	Oasl2
P2RX7	P2rx7
P2RX4	P2rx4
CAMKK2	Camkk2
ANAPC5	Anapc5
RNF34	Rnf34
KDM2B	Kdm2b
ORAI1	Orai1
MORN3	Morn3
TMEM120B	Tmem120b
RHOF	Rhof
SETD1B	Setd1b
HPD	Hpd
PSMD9	Psmd9
BCL7A	Bcl7a
MLXIP	Mlxip
LRRC43	Lrrc43
B3GNT4	B3gnt4
DIABLO	Diablo
VPS33A	Vps33a
CLIP1	Clip1
ZCCHC8	Zcchc8
RSRC2	Rsrc2
KNTC1	Kntc1
HCAR2	Hcar2
HCAR1	Hcar1
DENR	Denr
CCDC62	Ccdc62
HIP1R	Hip1r
VPS37B	Vps37b
ABCB9	Abcb9
OGFOD2	Ogfod2
ARL6IP4	Arl6ip4
PITPNM2	Pitpnm2
MPHOSPH9	Mphosph9
CDK2AP1	Cdk2ap1
SBNO1	Sbno1
RILPL2	Rilpl2
SNRNP35	Snrnp35
RILPL1	Rilpl1
TMED2	Tmed2
DDX55	Ddx55
EIF2B1	Eif2b1
GTF2H3	Gtf2h3
TCTN2	Tctn2
ATP6V0A2	Atp6v0a2
DNAH10	Dnah10
CCDC92	Ccdc92
ZNF664	Zfp664
NCOR2	Ncor2
SCARB1	Scarb1
UBC	Ubc
DHX37	Dhx37
BRI3BP	Bri3bp
AACS	Aacs
TMEM132B	Tmem132b
TMEM132C	Tmem132c
SLC15A4	Slc15a4
GLT1D1	Glt1d1
TMEM132D	Tmem132d
FZD10	Fzd10
PIWIL1	Piwil1
RIMBP2	Rimbp2
STX2	Stx2
RAN	Ran
ADGRD1	Adgrd1
SFSWAP	Sfswap
MMP17	Mmp17
ULK1	Ulk1
PUS1	Pus1
EP400	Ep400
DDX51	Ddx51
NOC4L	Noc4l
GALNT9	Galnt9
FBRSL1	Fbrsl1
LRCOL1	Lrcol1
P2RX2	P2rx2
POLE	Pole
PXMP2	Pxmp2
PGAM5	Pgam5
ANKLE2	Ankle2
GOLGA3	Golga3
CHFR	Chfr
ZNF605	Zfp605

## Sheet: Chr14q Genes in Library
Human Gene	Mouse Homolog
POTEM	4930430A15Rik		Human Genes		558
POTEG	Poteg		Mouse Homologs		571
OR4N2	Olfr733
OR4Q3	Olfr735
OR4M1	Olfr734
OR4K2	Olfr730
OR4K5	Olfr729
OR4K1	Olfr728
OR4K15	Olfr725_Olfr726_Olfr727
OR4L1	Olfr723_Olfr724
OR4N5	Olfr722
OR11G2	Olfr738_Olfr739_Olfr740_Olfr742_Olfr743_Olfr744
OR11H6	Olfr745
OR11H4	Olfr747_Olfr749
TTC5	Ttc5
CCNB1IP1	Ccnb1ip1
PARP2	Parp2
TEP1	Tep1
KLHL33	Klhl33
OSGEP	Osgep
APEX1	Apex1
PIP4P1	Tmem55b
PNP	Pnp
RNASE10	Rnase10
RNASE9	Rnase9
RNASE11	Rnase11
RNASE12	Rnase12
OR6S1	Olfr750
ANG	Ang
RNASE4	Rnase4
EDDM3B	Eddm3b
RNASE6	Rnase6
RNASE1	Rnase1
RNASE2	Ear1_Ear4
METTL17	Mettl17
SLC39A2	Slc39a2
NDRG2	Ndrg2
TPPP2	Tppp2
RNASE13	Rnase13
ARHGEF40	Arhgef40
ZNF219	Zfyve1
TMEM253	Tmem253
OR5AU1	Olfr221
HNRNPC	Hnrnpc
RPGRIP1	Rpgrip1
SUPT16H	Supt16
CHD8	Chd8
RAB2B	Rab2b
TOX4	Tox4
METTL3	Mettl3
SALL2	Sall2
OR10G3	Olfr1512_Olfr1513
OR10G2	Olfr1511
OR4E2	Olfr1509
OR4E1	Olfr1507_Olfr1508
DAD1	Dad1
ABHD4	Abhd4
OXA1L	Oxa1l
SLC7A7	Slc7a7
MRPL52	Mrpl52
MMP14	Mmp14
LRP10	Lrp10
REM2	Rem2
PRMT5	Prmt5
HAUS4	Haus4
AJUBA	Ajuba
C14orf93	4931414P19Rik
PSMB5	Psmb5
PSMB11	Psmb11
CDH24	Cdh24
ACIN1	Acin1
C14orf119	1700123O20Rik
CEBPE	Cebpe
SLC7A8	Slc7a8
HOMEZ	Homez
PPP1R3E	Ppp1r3e
BCL2L2	Bcl2l2
PABPN1	Pabpn1
SLC22A17	Slc22a17
EFS	Efs
IL25	Il25
CMTM5	Cmtm5
MYH6	Myh6
MYH7	Myh7
NGDN	Ngdn
ZFHX2	Zfhx2
THTPA	Thtpa
AP1G2	Ap1g2
JPH4	Jph4
DHRS2	Dhrs2
DHRS4	Dhrs4
CARMIL3	Lrrc16b
CPNE6	Cpne6
NRL	Nrl
PCK2	Pck2
DCAF11	Dcaf11
FITM1	Fitm1
PSME1	Psme1
EMC9	Emc9
PSME2	Psme2
RNF31	Rnf31
IRF9	Irf9
REC8	Rec8
IPO4	Ipo4
TM9SF1	Tm9sf1
TSSK4	Tssk4
CHMP4A	Chmp4b
MDP1	Mdp1
NEDD8	Nedd8
GMPR2	Gmpr2
TINF2	Tinf2
TGM1	Tgm1
RABGGTA	Rabggta
DHRS1	Dhrs1
NOP9	Nop9
CIDEB	Cideb
LTB4R2	Ltb4r2
LTB4R	Ltb4r1
ADCY4	Adcy4
RIPK3	Ripk3
NFATC4	Nfatc4
NYNRIN	Nynrin
CBLN3	Cbln3
KHNYN	Khnyn
SDR39U1	Sdr39u1
CMA1	Cma1
CTSG	Ctsg
GZMH	Gzmd
GZMB	Gzmb
STXBP6	Stxbp6
NOVA1	Nova1
FOXG1	Foxg1
PRKD1	Prkd1
G2E3	G2e3
SCFD1	Scfd1
COCH	Coch
STRN3	Strn3
AP4S1	Ap4s1
HECTD1	Hectd1
HEATR5A	Heatr5a
DTD2	Dtd2
GPR33	Gpr33
NUBPL	Nubpl
ARHGAP5	Arhgap5
AKAP6	Akap6
NPAS3	Npas3
EGLN3	Egln3
SPTSSA	Sptssa
EAPP	Eapp
SNX6	Snx6
CFL2	Cfl2
BAZ1A	Baz1a
SRP54	Srp54a
FAM177A1	Fam177a
PPP2R3C	Ppp2r3c
PRORP	1110008L16Rik
PSMA6	Psma6
NFKBIA	Nfkbia
INSM2	Insm2
RALGAPA1	Ralgapa1
BRMS1L	Brms1l
MBIP	Mbip
NKX2-1	Nkx2-1
NKX2-8	Nkx2-9
PAX9	Pax9
SLC25A21	Slc25a21
MIPOL1	Mipol1
FOXA1	Foxa1
TTC6	4921506M07Rik
SSTR1	Sstr1
CLEC14A	Clec14a
SEC23A	Sec23a
GEMIN2	Gemin2
TRAPPC6B	Trappc6b
PNN	Pnn
FBXO33	Fbxo33
LRFN5	Lrfn5
FSCB	Fscb
KLHL28	Klhl28
TOGARAM1	Fam179b
PRPF39	Prpf39
FKBP3	Fkbp3
FANCM	Fancm
MIS18BP1	Mis18bp1
RPL10L	Rpl10l
MDGA2	Mdga2
RPS29	Rps29
LRR1	Lrr1
RPL36AL	Rpl36al
MGAT2	Mgat2
DNAAF2	Dnaaf2
POLE2	Pole2
KLHDC1	Klhdc1
KLHDC2	Klhdc2
NEMF	Nemf
ARF6	Arf6
VCPKMT	Vcpkmt
SOS2	Sos2
L2HGDH	L2hgdh
DMAC2L	Atp5s
CDKL1	Cdkl1
MAP4K5	Map4k5
ATL1	Atl1
SAV1	Sav1
NIN	Nin
PYGL	Pygl
ABHD12B	Abhd12b
TRIM9	Trim9
TMX1	Tmx1
FRMD6	Frmd6
GNG2	Gng2
RTRAF	2700060E02Rik
NID2	Nid2
PTGDR	Ptgdr
PTGER2	Ptger2
TXNDC16	Txndc16
GPR137C	Gpr137c
PSMC6	Psmc6
STYX	Styx
GNPNAT1	Gnpnat1
FERMT2	Fermt2
DDHD1	Ddhd1
BMP4	Bmp4
CDKN3	Cdkn3
CNIH1	Cnih1
GMFB	Gmfb
CGRRF1	Cgrrf1
SAMD4A	Samd4
GCH1	Gch1
WDHD1	Wdhd1
SOCS4	Socs4
MAPK1IP1L	Mapk1ip1l
LGALS3	Lgals3
DLGAP5	Dlgap5
FBXO34	Fbxo34
ATG14	Atg14
TBPL2	Tbpl2
KTN1	Ktn1
PELI2	Peli2
TMEM260	Tmem260
OTX2	Otx2
EXOC5	Exoc5
AP5M1	Ap5m1
NAA30	Naa30
CCDC198	1700011H14Rik
SLC35F4	Slc35f4
ARMH4	3632451O06Rik
ACTR10	Actr10
PSMA3	Psma3
ARID4A	Arid4a
TOMM20L	Tomm20l
TIMM9	Timm9
KIAA0586	2700049A03Rik
DACT1	Dact1
DAAM1	Daam1
GPR135	Gpr135
L3HYPDH	L3hypdh
JKAMP	Jkamp
CCDC175	Ccdc175
RTN1	Rtn1
LRRC9	Lrrc9
PCNX4	Pcnxl4
DHRS7	Dhrs7
PPM1A	Ppm1a
C14orf39	4930447C04Rik
SIX6	Six6
SIX1	Six1
SIX4	Six4
MNAT1	Mnat1
TRMT5	Trmt5
SLC38A6	Slc38a6
PRKCH	Prkch
TMEM30B	Tmem30b
HIF1A	Hif1a
SNAPC1	Snapc1
SYT16	Syt16
KCNH5	Kcnh5
RHOJ	Rhoj
GPHB5	Gphb5
PPP2R5E	Ppp2r5e
WDR89	Wdr89
SGPP1	Sgpp1
SYNE2	Syne2
ESR2	Esr2
MTHFD1	Mthfd1
ZBTB25	Zbtb25
AKAP5	Akap5
ZBTB1	Zbtb1
HSPA2	Hspa2
PPP1R36	Ppp1r36
PLEKHG3	Plekhg3
SPTB	Sptb
CHURC1	Churc1
GPX2	Gpx2
RAB15	Rab15
FNTB	Fntb
MAX	Max
FUT8	Fut8
GPHN	Gphn
FAM71D	Fam71d
PALS1	Mpp5
ATP6V1D	Atp6v1d
EIF2S1	Eif2s1
PLEK2	Plek2
TMEM229B	Tmem229b
PLEKHH1	Plekhh1
PIGH	Pigh
ARG2	Arg2
VTI1B	Vti1b
RDH11	Rdh11
RDH12	Rdh12
ZFYVE26	Zfp839
RAD51B	Rad51b
ZFP36L1	Zfp219
ACTN1	Actn1
DCAF5	Dcaf5
EXD2	Exd2
GALNT16	Galnt16
ERH	Erh
SLC39A9	Slc39a9
PLEKHD1	Plekhd1
CCDC177	Ccdc177
SRSF5	Srsf5
SLC10A1	Slc10a1
SMOC1	Smoc1
SLC8A3	Slc8a3
COX16	Cox16
SYNJ2BP	Synj2bp
ADAM21	Adam21
ADAM20	Adam20
MED6	Med6
TTC9	Ttc9
MAP3K9	Map3k9
PCNX1	Pcnx
SIPA1L1	Sipa1l1
RGS6	Rgs6
DPF3	Dpf3
DCAF4	Dcaf4
ZFYVE1	Zfp36l1
RBM25	Rbm25
PSEN1	Psen1
PAPLN	Papln
NUMB	Numb
RIOX1	2410016O06Rik
ACOT1	Acot1
ACOT2	Acot2
ACOT4	Acot4
ACOT6	Acot6
DNAL1	Dnal1
PNMA1	Pnma1
MIDEAS	Mia2
PTGR2	Ptgr2
ZNF410	Zfyve21
FAM161B	Fam161b
COQ6	Coq6
ENTPD5	Entpd5
ALDH6A1	Aldh6a1
LIN52	Lin52
VSX2	Vsx2
ABCD4	Abcd4
VRTN	Vrtn
SYNDIG1L	Syndig1l
NPC2	Npc2
ISCA2	Isca2
LTBP2	Ltbp2
AREL1	Arel1
FCF1	Fcf1
YLPM1	Ylpm1
PROX2	Prox2
DLST	Dlst
RPS6KL1	Rps6kl1
PGF	Pgf
EIF2B2	Eif2b2
MLH3	Mlh3
ACYP1	Acyp1
ZC2HC1C	Zc2hc1c
NEK9	Nek9
TMED10	Tmed10
FOS	Fos
JDP2	Jdp2
BATF	Batf
FLVCR2	Mfsd7c
TTLL5	Ttll5
ERG28	0610007P14Rik
IFT43	Ift43
TGFB3	Tgfb3
GPATCH2L	Gpatch2l
ESRRB	Esrrb
VASH1	Vash1
ANGEL1	Angel1
IRF2BPL	Irf2bpl
CIPC	Cipc
TMEM63C	Tmem63c
ZDHHC22	Zdhhc22
NGB	Ngb
POMT2	Pomt2
GSTZ1	Gstz1
TMED8	Tmed8
SAMD15	Samd15
NOXRED1	Noxred1
VIPAS39	Vipas39
AHSA1	Ahsa1
ISM2	Ism2
SPTLC2	Sptlc2
ALKBH1	Alkbh1
SLIRP	Slirp
SNW1	Snw1
ADCK1	Adck1
NRXN3	Nrxn3
DIO2	Dio2
CEP128	Cep128
TSHR	Tshr
GTF2A1	Gtf2a1
STON2	Ston2
SEL1L	Sel1l
FLRT2	Flrt2
GALC	Galc
GPR65	Gpr65
KCNK10	Kcnk10
SPATA7	Spata7
PTPN21	Ptpn21
ZC3H14	Zc3h14
EML5	Eml5
TTC8	Ttc8
FOXN3	Foxn3
EFCAB11	Efcab11
TDP1	Tdp1
KCNK13	Kcnk13
PSMC1	Psmc1
NRDE2	Nrde2
CALM1	Calm1
TTC7B	Ttc7b
RPS6KA5	Rps6ka5
DGLUCY	9030617O03Rik
GPR68	Gpr68
CCDC88C	Ccdc88c
CATSPERB	Catsperb
TC2N	Tc2n
FBLN5	Fbln5
TRIP11	Trip11
ATXN3	Atxn3
CPSF2	Cpsf2
SLC24A4	Slc24a4
RIN3	Rin3
LGMN	Lgmn
GOLGA5	Golga5
CHGA	Chga
ITPK1	Itpk1
MOAP1	Moap1
TMEM251	Tmem251
GON7	AK010878
UBR7	Ubr7
BTBD7	Btbd7
UNC79	Unc79
COX8C	Cox8c
PRIMA1	Prima1
FAM181A	Fam181a
ASB2	Asb2
OTUB2	Otub2
DDX24	Ddx24
IFI27L1	Ifi27l2a
IFI27	Ifi27
IFI27L2	Ifi27l2b
PPP4R4	Ppp4r4
SERPINA10	Serpina10
SERPINA6	Serpina6
SERPINA1	Serpina1a
SERPINA11	Serpina11
SERPINA9	Serpina9
SERPINA12	Serpina12
SERPINA5	Serpina5
SERPINA3	Serpina3a
GSC	Gsc
DICER1	Dicer1
CLMN	Clmn
SYNE3	Syne3
GLRX5	Glrx5
TCL1B	Tcl1b1_Tcl1b5
TCL1A	Tcl1
C14orf132	D430019H16Rik
BDKRB2	Bdkrb2
BDKRB1	Bdkrb1
ATG2B	Atg2b
GSKIP	Gskip
AK7	Ak7
PAPOLA	Papola
VRK1	Vrk1
BCL11B	Bcl11b
SETD3	Setd3
CCNK	Ccnk
CCDC85C	Ccdc85c
HHIPL1	Hhipl1
CYP46A1	Cyp46a1
EML1	Eml1
EVL	Evl
DEGS2	Degs2
YY1	Yy1
SLC25A29	Slc25a29
SLC25A47	Slc25a47
WARS1	Wars
WDR25	Wdr25
BEGAIN	Begain
DLK1	Dlk1
RTL1	Rtl1
DIO3	Dio3
PPP2R5C	Ppp2r5c
DYNC1H1	Dync1h1
HSP90AA1	Hsp90aa1
WDR20	Wdr20
MOK	Mok
ZNF839	Zfyve26
CINP	Cinp
TECPR2	Tecpr2
ANKRD9	Ankrd9
RCOR1	Rcor1
TRAF3	Traf3
AMN	Amn
CDC42BPB	Cdc42bpb
EXOC3L4	Exoc3l4
TNFAIP2	Tnfaip2
EIF5	Eif5
MARK3	Mark3
CKB	Ckb
TRMT61A	Trmt61a
BAG5	Bag5
KLC1	Klc1
COA8	Apopt1
XRCC3	Xrcc3
ZFYVE21	Zfp410
PPP1R13B	Ppp1r13b
ATP5MJ	2010107E04Rik
TDRD9	Tdrd9
RD3L	Rd3l
ASPG	Aspg
KIF26A	Kif26a
TMEM179	Tmem179
C14orf180	A530016L24Rik
INF2	Inf2
ADSS1	Adssl1
SIVA1	Siva1
AKT1	Akt1
ZBTB42	Zbtb42
CEP170B	Cep170b
PLD4	Pld4
CLBA1	BC022687
CDCA4	Cdca4
GPR132	Gpr132
JAG2	Jag2
NUDT14	Nudt14
BRF1	Brf1
BTBD6	Btbd6
PACS2	Pacs2
TEX22	Tex22
MTA1	Mta1
CRIP2	Crip2
CRIP1	Crip1
TEDC1	4930427A07Rik
TMEM121	Tmem121

## Sheet: Chr15q Genes in Library
Human Gene	Mouse Homolog
NIPA1	Nipa1		Human Genes		490
NIPA2	Nipa2		Mouse Homologs		494
CYFIP1	Cyfip1
TUBGCP5	Tubgcp5
MKRN3	Mkrn3
MAGEL2	Magel2
NDN	Ndn
SNRPN	Snrpn
SNURF	Snurf
UBE3A	Ube3a
ATP10A	Atp10a
GABRB3	Gabrb3
GABRA5	Gabra5
GABRG3	Gabrg3
OCA2	Oca2
HERC2	Herc2
APBA2	Apba2
FAM189A1	Fam189a1
TJP1	Tjp1
FAN1	Fan1
MTMR10	Mtmr10
TRPM1	Trpm1
KLF13	Klf13
OTUD7A	Otud7a
CHRNA7	Chrna7
ARHGAP11A	Arhgap11a
SCG5	Scg5
GREM1	Grem1
FMN1	Fmn1
RYR3	Ryr3
AVEN	Aven
CHRM5	Chrm5
EMC7	Emc7
KATNBL1	Katnbl1
EMC4	Emc4
SLC12A6	Slc12a6
NOP10	Nop10
NUTM1	Nutm1
LPCAT4	Lpcat4
GJD2	Gjd2
ACTC1	Actc1
AQR	Aqr
ZNF770	Zfp770
NANOGP8	Nanog
DPH6	Dph6
MEIS2	Meis2
TMCO5A	Tmco5
SPRED1	Spred1
FAM98B	Fam98b
RASGRP1	Rasgrp1
THBS1	Thbs1
FSIP1	Fsip1
GPR176	Gpr176
EIF2AK4	Eif2ak4
SRP14	Srp14
BMF	Bmf
BUB1B	Bub1b
PAK6	Pak6
PLCB2	Plcb2
ANKRD63	Ankrd63
INAFM2	Inafm2
PHGR1	Phgr1
DISP2	Disp2
KNSTRN	Knstrn
IVD	Ivd
BAHD1	Bahd1
CHST14	Chst14
CCDC32	Ccdc32
RPUSD2	Rpusd2
RAD51	Rad51
RMDN3	Rmdn3
GCHFR	Gchfr
DNAJC17	Dnajc17
C15orf62	Gm14137
ZFYVE19	Zfyve19
PPP1R14D	Ppp1r14d
SPINT1	Spint1
RHOV	Rhov
VPS18	Vps18
DLL4	Dll4
CHAC1	Chac1
INO80	Ino80
EXD1	Exd1
CHP1	Chp1
OIP5	Oip5
NUSAP1	Nusap1
NDUFAF1	Ndufaf1
RTF1	Rtf1
ITPKA	Itpka
LTK	Ltk
RPAP1	Rpap1
TYRO3	Tyro3
MGA	Mga
MAPKBP1	Mapkbp1
JMJD7	Jmjd7
PLA2G4B	Pla2g4b
EHD4	Ehd4
PLA2G4E	Pla2g4e
PLA2G4D	Pla2g4d
PLA2G4F	Pla2g4f
VPS39	Vps39
TMEM87A	Tmem87a
GANC	Ganc
CAPN3	Capn3
ZNF106	Zfp106
SNAP23	Snap23
LRRC57	Lrrc57
HAUS2	Haus2
CDAN1	Cdan1
TTBK2	Ttbk2
UBR1	Ubr1
TMEM62	Tmem62
CCNDBP1	Ccndbp1
TGM5	Tgm5
TGM7	Tgm7
LCMT2	Lcmt2
ADAL	Adal
ZSCAN29	Zscan29
TUBGCP4	Tubgcp4
TP53BP1	Trp53bp1
MAP1A	Map1a
PPIP5K1	Ppip5k1
STRC	Strc
CATSPER2	Catsper2
CKMT1A	Ckmt1
PDIA3	Pdia3
ELL3	Ell3
SERF2	Serf2
SERINC4	Serinc4
HYPK	Hypk
MFAP1	Mfap1a
WDR76	Wdr76
FRMD5	Frmd5
CTDSPL2	Ctdspl2
SPG11	Spg11
PATL2	Patl2
B2M	B2m
TRIM69	Trim69
SORD	Sord
DUOX2	Duox2
DUOXA2	Duoxa2
DUOXA1	Duoxa1
DUOX1	Duox1
SHF	Shf
SLC28A2	Slc28a2
GATM	Gatm
SPATA5L1	Spata5l1
C15orf48	AA467197
SLC30A4	Slc30a4
BLOC1S6	Bloc1s6
SEMA6D	Sema6d
SLC24A5	Slc24a5
MYEF2	Myef2
CTXN2	Ctxn2
SLC12A1	Slc12a1
DUT	Dut
FBN1	Fbn1
CEP152	Cep152
SHC4	Shc4
EID1	Eid1
SECISBP2L	Secisbp2l
COPS2	Cops2
GALK2	Galk2
FAM227B	Fam227b
FGF7	Fgf7
DTWD1	Dtwd1
ATP8B4	Atp8b4
SLC27A2	Slc27a2
HDC	Hdc
GABPB1	Gabpb1
USP8	Usp8
USP50	Usp50
TRPM7	Trpm7
SPPL2A	Sppl2a
AP4E1	Ap4e1
TNFAIP8L3	Tnfaip8l3
CYP19A1	Cyp19a1
GLDN	Gldn
DMXL2	Dmxl2
SCG3	Scg3
LYSMD2	Lysmd2
TMOD2	Tmod2
TMOD3	Tmod3
LEO1	Leo1
MAPK6	Mapk6
BCL2L10	Bcl2l10
GNB5	Gnb5
MYO5C	Myo5c
MYO5A	Myo5a
ARPP19	Arpp19
FAM214A	Fam214a
ONECUT1	Onecut1
WDR72	Wdr72
UNC13C	Unc13c
RSL24D1	Rsl24d1
RAB27A	Rab27a
PIGB	Pigb
CCPG1	Ccpg1
PYGO1	Pygo1
PRTG	Prtg
NEDD4	Nedd4
RFX7	Rfx7
TEX9	Tex9
MNS1	Mns1
ZNF280D	Zfp280d
TCF12	Tcf12
CGNL1	Cgnl1
MYZAP	Myzap
POLR2M	Polr2m
ALDH1A2	Aldh1a2
AQP9	Aqp9
LIPC	Lipc
ADAM10	Adam10
RNF111	Rnf111
SLTM	Sltm
CCNB2	Ccnb2
MYO1E	Myo1e
LDHAL6B	Ldhal6b
FAM81A	Fam81a
GCNT3	Gcnt3
GTF2A2	Gtf2a2
BNIP2	Bnip2
FOXB1	Foxb1
ANXA2	Anxa2
ICE2	Ice2
RORA	Rora
VPS13C	Vps13c
C2CD4A	C2cd4a
C2CD4B	C2cd4b
TLN2	Tln2
TPM1	Tpm1
LACTB	Lactb
RPS27L	Rps27l
RAB8B	Rab8b
APH1B	Aph1b
CA12	Car12
USP3	Usp3
FBXL22	Fbxl22
HERC1	Herc1
DAPK2	Dapk2
SNX1	Snx1
SNX22	Snx22
PPIB	Ppib
CSNK1G1	Csnk1g1
TRIP4	Trip4
ZNF609	Zfp609
OAZ2	Oaz2
RBPMS2	Rbpms2
PIF1	Pif1
PLEKHO2	Plekho2
SPG21	Spg21
MTFMT	Mtfmt
SLC51B	Slc51b
RASL12	Rasl12
KBTBD13	Kbtbd13
UBAP1L	Ubap1l
PDCD7	Pdcd7
CLPX	Clpx
CILP	Cilp
PARP16	Parp16
IGDCC3	Igdcc3
IGDCC4	Igdcc4
DPP8	Dpp8
HACD3	Hacd3
SLC24A1	Slc24a1
DENND4A	Dennd4a
RAB11A	Rab11a
MEGF11	Megf11
DIS3L	Dis3l
TIPIN	Tipin
MAP2K1	Map2k1
SNAPC5	Snapc5
RPL4	Rpl4
ZWILCH	Zwilch
LCTL	Lctl
SMAD6	Smad6
SMAD3	Smad3
AAGAB	Aagab
IQCH	Iqch
C15orf61	2300009A05Rik
MAP2K5	Map2k5
SKOR1	Skor1
PIAS1	Pias1
CALML4	Calml4
CLN6	Cln6
FEM1B	Fem1b
ITGA11	Itga11
CORO2B	Coro2b
ANP32A	Anp32a
SPESP1	Spesp1
GLCE	Glce
PAQR5	Paqr5
KIF23	Kif23
RPLP1	Rplp1
TLE3	Tle3
UACA	Uaca
LARP6	Larp6
LRRC49	Lrrc49
THSD4	Thsd4
NR2E3	Nr2e3
MYO9A	Myo9a
SENP8	Senp8
GRAMD2A	Gramd2
PKM	Pkm
PARP6	Parp6
CELF6	Celf6
HEXA	Hexa
TMEM202	Tmem202
ARIH1	Arih1
HIGD2B	Higd2a
BBS4	Bbs4
ADPGK	Adpgk
NEO1	Neo1
HCN4	Hcn4
REC114	Rec114
NPTN	Nptn
CD276	Cd276
TBC1D21	Tbc1d21
LOXL1	Loxl1
STOML1	Stoml1
PML	Pml
ISLR2	Islr2
ISLR	Islr
STRA6	Stra6
CCDC33	Ccdc33
CYP11A1	Cyp11a1
SEMA7A	Sema7a
UBL7	Ubl7
ARID3B	Arid3b
CLK3	Clk3
EDC3	Edc3
CYP1A1	Cyp1a1
CYP1A2	Cyp1a2
CSK	Csk
LMAN1L	Lman1l
CPLX3	Cplx3
ULK3	Ulk3
SCAMP2	Scamp2
MPI	Mpi
FAM219B	Fam219b
COX5A	Cox5a
RPP25	Rpp25
SCAMP5	Scamp5
PPCDC	Ppcdc
C15orf39	1700017B05Rik
COMMD4	Commd4
NEIL1	Neil1
MAN2C1	Man2c1
SIN3A	Sin3a
PTPN9	Ptpn9
SNUPN	Snupn
IMP3	Imp3
SNX33	Snx33
CSPG4	Cspg4
ODF3L1	Odf3l1
UBE2Q2	Ube2q2
FBXO22	Fbxo22
NRG4	Nrg4
ETFA	Etfa
ISL2	Isl2
SCAPER	Scaper
RCN2	Rcn2
PSTPIP1	Pstpip1
TSPAN3	Tspan3
PEAK1	Peak1
HMG20A	Hmg20a
LINGO1	Lingo1
TBC1D2B	Tbc1d2b
SH2D7	Sh2d7
CIB2	Cib2
IDH3A	Idh3a
ACSBG1	Acsbg1
DNAJA4	Dnaja4
WDR61	Wdr61
CRABP1	Crabp1
IREB2	Ireb2
HYKK	Hykk
PSMA4	Psma4
CHRNA5	Chrna5
CHRNA3	Chrna3
CHRNB4	Chrnb4
ADAMTS7	Adamts7
MORF4L1	Morf4l1
CTSH	Ctsh
RASGRF1	Rasgrf1
ANKRD34C	Ankrd34c
TMED3	Tmed3
MTHFS	Mthfs
BCL2A1	Bcl2a1a
ZFAND6	Zfand6
FAH	Fah
ARNT2	Arnt2
ABHD17C	Abhd17c
CEMIP	Cemip
IL16	Il16
STARD5	Stard5
TMC3	Tmc3
MEX3B	Mex3b
SAXO2	Saxo2
RPS17	Rps17
CPEB1	Cpeb1
AP3B2	Ap3b2
FSD2	Fsd2
WHAMM	Whamm
HOMER2	Homer2
C15orf40	3110040N11Rik
BTBD1	Btbd1
TM6SF1	Tm6sf1
BNC1	Bnc1
SH3GL3	Sh3gl3
ADAMTSL3	Adamtsl3
ZSCAN2	Zscan2
WDR73	Wdr73
NMB	Nmb
SEC11A	Sec11a
ZNF592	Zfp592
ALPK3	Alpk3
SLC28A1	Slc28a1
PDE8A	Pde8a
AKAP13	Akap13
KLHL25	Klhl25
AGBL1	Agbl1
NTRK3	Ntrk3
MRPL46	Mrpl46
MRPS11	Mrps11
DET1	Det1
AEN	Aen
ISG20	Isg20
ACAN	Acan
HAPLN3	Hapln3
MFGE8	Mfge8
ABHD2	Abhd2
RLBP1	Rlbp1
FANCI	Fanci
POLG	Polg
RHCG	Rhcg
TICRR	Ticrr
KIF7	Kif7
PLIN1	Plin1
PEX11A	Pex11a
WDR93	Wdr93
MESP1	Mesp1
MESP2	Mesp2
ANPEP	Anpep
AP3S2	Ap3s2
ARPIN	2610034B18Rik
ZNF710	Zfp710
IDH2	Idh2
SEMA4B	Sema4b
CIB1	Cib1
GDPGP1	Gdpgp1
TTLL13P	Ttll13
NGRN	Ngrn
IQGAP1	Iqgap1
CRTC3	Crtc3
BLM	Blm
FURIN	Furin
FES	Fes
MAN2A2	Man2a2
HDDC3	Hddc3
UNC45A	Unc45a
RCCD1	Rccd1
PRC1	Prc1
VPS33B	Vps33b
SV2B	Sv2b
SLCO3A1	Slco3a1
ST8SIA2	St8sia2
FAM174B	Fam174b
CHD2	Chd2
RGMA	Rgma
MCTP2	Mctp2
NR2F2	Nr2f2
ARRDC4	Arrdc4
IGF1R	Igf1r
PGPEP1L	Pgpep1l
SYNM	Synm
TTC23	Ttc23
LRRC28	Lrrc28
MEF2A	Mef2a
LYSMD4	Lysmd4
ADAMTS17	Adamts17
CERS3	Cers3
ASB7	Asb7
ALDH1A3	Aldh1a3
LRRK1	Lrrk1
CHSY1	Chsy1
SNRPA1	Snrpa1
PCSK6	Pcsk6
TM2D3	Tm2d3
OR4F4	Olfr1280_Olfr1283_Olfr1287_Olfr1289_Olfr1302
