# Supplementary material for: Aneuploidy drives the acquisition of cancer-specific driver genes
Source: Research Square preprint supplement (doi:10.21203/rs.3.rs-4941895/v1), 2024-09-04
Supplement: Supplementary file 7 [file d885d83df15352dc10590b8f.xlsx]

## Sheet: Sheet1
Target	Company	Catalogue Number	Application	Concentration	RRID
Plgrkt	Thermo Fisher Scientific	PA5-98932	Western Blotting	1 in 1000	AB_2813545
Erk1/2	Cell Signaling Technology	4696	Western Blotting	1 in 2000	AB_390780
Hsp60	Cell Signaling Technology	4870	Western Blotting	1 in 1000	AB_2295614
Erbb2	Cell Signaling Technology	2165	Immunohistochemistry	1 in 200	AB_10692490
Mettl14	Novus	NBP1-81392	Western Blotting	1 in 1000	AB_11021780
β-Actin	Sigma-Aldrich	A1978	Western Blotting	1 in 20000	AB_476692
Gapdh	BioLegend	607904	Western Blotting	1 in 3000	AB_2734505
Collagen IV	Abcam	ab6586	Immunohistochemistry	1 in 400	AB_305584
Anti-Rabbit IgG	Bio-Rad	170-6515	Western Blotting	1 in 10000	AB_11125142
Anti-Mouse IgG	Bio-Rad	170-6516	Western Blotting	1 in 10000	AB_11125547
Anti-Rabbit IgG	Vector Laboratories	MP-7401	Immunohistochemistry	Neat	AB_2336529
