# Supplementary material for: Aneuploidy drives the acquisition of cancer-specific driver genes
Source: Research Square preprint supplement (doi:10.21203/rs.3.rs-4941895/v1), 2024-09-04
Supplement: Supplementary file 8 [file e1ec3bcf9d00d1a47b8f4074.xlsx]

## Sheet: Sheet1
Human_Gene	Pten_hits	Rb1_hits	Total_hits	Percent_hits_within_Library	Number_of_Guides	Confidence
UBE2N	69	1	70	29.0456	4	High
TRAF3	64	5	69	23.6301	4	High
CSNK1A1	29	4	33	23.2394	4	High
FBXW7	27	2	29	17.7914	2	High
PLGRKT	10	2	12	13.3333	2	High
METTL14	18	2	20	12.2699	4	HIgh
SAV1	22	12	34	11.6438	4	High
SPRED1	23	4	27	10.757	4	High
MRPS18B	4	2	6	9.23077	2	High
INO80	18	4	22	8.76494	4	High
ITIH2	4	4	8	6.55738	2	High
TAS2R10	6	0	6	5.35714	2	High
TAS2R14	6	0	6	5.35714	2	High
COMMD3	5	0	5	4.09836	2	Low
VPS18	10	0	10	3.98406	3	Low
ADAM10	10	0	10	3.98406	3	Low
NFKBIA	5	6	11	3.76712	2	Low
ARNTL2	4	0	4	3.57143	2	Low
SPATA6L	2	1	3	3.33333	2	Low
PROSER2	2	2	4	3.27869	3	Low
LARP4B	4	0	4	3.27869	2	Low
FKBP5	2	0	2	3.07692	2	Low
KMT2D	6	1	7	2.90456	3	Low
TCF7	4	0	4	2.8169	2	Low
SOX5	3	0	3	2.67857	3	Low
MRPL51	1	2	3	2.67857	3	Low
CLEC4A	2	1	3	2.67857	2	Low
MANSC4	3	0	3	2.67857	2	Low
SLC2A3	1	2	3	2.67857	2	Low
GDI2	2	1	3	2.45902	3	Low
RBM17	2	1	3	2.45902	3	Low
OLAH	3	0	3	2.45902	3	Low
MTPAP	2	1	3	2.45902	3	Low
MAP3K8	2	1	3	2.45902	2	Low
ITGB1	3	0	3	2.45902	2	Low
PARD3	3	0	3	2.45902	2	Low
FOXD4	1	1	2	2.22222	2	Low
AK3	2	0	2	2.22222	2	Low
RANBP6	2	0	2	2.22222	2	Low
FREM1	2	0	2	2.22222	2	Low
SLC24A2	2	0	2	2.22222	2	Low
FOCAD	2	0	2	2.22222	2	Low
DMRTA1	2	0	2	2.22222	2	Low
IL11RA	2	0	2	2.22222	2	Low
CA9	1	1	2	2.22222	2	Low
ZBTB5	1	1	2	2.22222	2	Low
PCDHA12	1	2	3	2.11268	3	Low
APC	2	1	3	2.11268	2	Low
FRYL	1	2	3	1.84049	2	Low
CNGA1	3	0	3	1.84049	2	Low
B4GALNT3	2	0	2	1.78571	2	Low
NRIP2	2	0	2	1.78571	2	Low
RHNO1	2	0	2	1.78571	2	Low
COPS7A	1	1	2	1.78571	2	Low
GPR162	2	0	2	1.78571	2	Low
NANOG	1	1	2	1.78571	2	Low
A2M	1	1	2	1.78571	2	Low
C12orf60	2	0	2	1.78571	2	Low
SLCO1B1	1	1	2	1.78571	2	Low
TSPAN11	2	0	2	1.78571	2	Low
LRP6	1	1	2	1.78571	2	Low
SFMBT2	1	1	2	1.63934	2	Low
TAF3	1	1	2	1.63934	2	Low
USP6NL	1	1	2	1.63934	2	Low
NUDT5	2	0	2	1.63934	2	Low
PRPF18	1	1	2	1.63934	2	Low
DCLRE1C	1	1	2	1.63934	2	Low
MEIG1	1	1	2	1.63934	2	Low
NSUN6	2	0	2	1.63934	2	Low
GAD2	2	0	2	1.63934	2	Low
KIF5B	0	2	2	1.63934	2	Low
CUL2	2	0	2	1.63934	2	Low
ZNF25	0	2	2	1.63934	2	Low
DHFR	1	1	2	1.40845	2	Low
SSBP2	1	1	2	1.40845	2	Low
SLC4A9	2	0	2	1.40845	2	Low
MFAP3	2	0	2	1.40845	2	Low
ACVR1B	3	0	3	1.24481	2	Low
GDF11	3	0	3	1.24481	2	Low
MYF5	3	0	3	1.24481	2	Low
PHLDA1	1	2	3	1.24481	1	Low
ADD1	2	0	2	1.22699	2	Low
NDST3	2	0	2	1.22699	2	Low
TRIM60	2	0	2	1.22699	2	Low
SMAD3	3	0	3	1.19522	2	Low
DET1	2	1	3	1.19522	2	Low
BLM	2	1	3	1.19522	2	Low
VPS33B	2	1	3	1.19522	2	Low
NUMB	3	0	3	1.0274	2	Low
JDP2	2	1	3	1.0274	2	Low
MAS1L	3	0	3	4.61538	1	No
GNMT	1	2	3	4.61538	1	No
RFX3	3	0	3	3.33333	1	No
MOB3B	1	2	3	3.33333	1	No
TMEM151B	2	0	2	3.07692	1	No
TRIM26	1	1	2	3.07692	1	No
PIM1	2	0	2	3.07692	1	No
AIMP1	1	4	5	3.06748	1	No
NRP1	3	0	3	2.45902	1	No
TPD52L3	2	0	2	2.22222	1	No
NDUFB6	2	0	2	2.22222	1	No
UBAP2	2	0	2	2.22222	1	No
ARHGEF39	1	1	2	2.22222	1	No
UBE2D3	2	1	3	1.84049	1	No
GNB3	2	0	2	1.78571	1	No
PTPN6	2	0	2	1.78571	1	No
TAS2R13	1	1	2	1.78571	1	No
WBP11	2	0	2	1.78571	1	No
PFKP	1	1	2	1.63934	1	No
AKR1C2	2	0	2	1.63934	1	No
SEPHS1	2	0	2	1.63934	1	No
ARL5B	2	0	2	1.63934	1	No
DNAJC1	0	2	2	1.63934	1	No
RPP40	1	0	1	1.53846	1	No
PPP1R3G	1	0	1	1.53846	1	No
OR2I1P	1	0	1	1.53846	1	No
ATP6V1G2	1	0	1	1.53846	1	No
DEF6	1	0	1	1.53846	1	No
FOXF2	1	0	1	1.53846	1	No
FOXC1	1	0	1	1.53846	1	No
PXDC1	1	0	1	1.53846	1	No
LY86	1	0	1	1.53846	1	No
TFAP2A	1	0	1	1.53846	1	No
SMIM13	1	0	1	1.53846	1	No
ADTRP	1	0	1	1.53846	1	No
RANBP9	1	0	1	1.53846	1	No
E2F3	1	0	1	1.53846	1	No
TRIM38	1	0	1	1.53846	1	No
BTN3A3	1	0	1	1.53846	1	No
HLA-F	0	1	1	1.53846	1	No
HLA-A	1	0	1	1.53846	1	No
FLOT1	1	0	1	1.53846	1	No
POU5F1	1	0	1	1.53846	1	No
C6orf47	1	0	1	1.53846	1	No
CLIC1	0	1	1	1.53846	1	No
MSH5	1	0	1	1.53846	1	No
PRRT1	1	0	1	1.53846	1	No
RXRB	1	0	1	1.53846	1	No
ZBTB22	1	0	1	1.53846	1	No
RPS10	1	0	1	1.53846	1	No
PACSIN1	1	0	1	1.53846	1	No
TCP11	0	1	1	1.53846	1	No
TULP1	1	0	1	1.53846	1	No
ARMC12	1	0	1	1.53846	1	No
C6orf89	1	0	1	1.53846	1	No
RNF8	1	0	1	1.53846	1	No
GUCA1B	1	0	1	1.53846	1	No
PRPH2	1	0	1	1.53846	1	No
PTK7	0	1	1	1.53846	1	No
DUSP22	1	0	1	1.53846	1	No
CDYL	1	0	1	1.53846	1	No
KIF13A	1	0	1	1.53846	1	No
ZFP57	1	0	1	1.53846	1	No
ABCF1	1	0	1	1.53846	1	No
MUC21	1	0	1	1.53846	1	No
HLA-DQA1	1	0	1	1.53846	1	No
SLC39A7	1	0	1	1.53846	1	No
RPL7L1	1	0	1	1.53846	1	No
GFRA3	1	1	2	1.40845	1	No
ADRB2	2	0	2	1.40845	1	No
NDST1	1	1	2	1.40845	1	No
FAM184B	2	0	2	1.22699	1	No
WFS1	1	1	2	1.22699	1	No
GRXCR1	2	0	2	1.22699	1	No
UCHL1	2	0	2	1.22699	1	No
ADH1A	2	0	2	1.22699	1	No
ASB5	2	0	2	1.22699	1	No
GALNT7	2	0	2	1.22699	1	No
IL15	2	0	2	1.22699	1	No
NPY5R	2	0	2	1.22699	1	No
TLR2	2	0	2	1.22699	1	No
USP38	2	0	2	1.22699	1	No
SLC10A7	0	2	2	1.22699	1	No
ZFP42	0	2	2	1.22699	1	No
ACTC1	3	0	3	1.19522	1	No
HMG20A	0	3	3	1.19522	1	No
DOCK8	1	0	1	1.11111	1	No
DMRT2	2	0	1	1.11111	1	No
VLDLR	1	0	1	1.11111	1	No
GLIS3	1	0	1	1.11111	1	No
SLC1A1	1	0	1	1.11111	1	No
PDCD1LG2	1	0	1	1.11111	1	No
ERMP1	1	0	1	1.11111	1	No
PTPRD	1	0	1	1.11111	1	No
TTC39B	1	0	1	1.11111	1	No
SNAPC3	1	0	1	1.11111	1	No
BNC2	1	0	1	1.11111	1	No
RPS6	1	0	1	1.11111	1	No
IFNA4	0	1	1	1.11111	1	No
IFNA14	1	0	1	1.11111	1	No
IFNA13	1	0	1	1.11111	1	No
ELAVL2	1	0	1	1.11111	1	No
PLAA	0	1	1	1.11111	1	No
LRRC19	1	0	1	1.11111	1	No
TEK	1	0	1	1.11111	1	No
IFNK	0	1	1	1.11111	1	No
DDX58	1	0	1	1.11111	1	No
TOPORS	1	0	1	1.11111	1	No
TAF1L	1	0	1	1.11111	1	No
TMEM215	1	0	1	1.11111	1	No
C9orf24	1	0	1	1.11111	1	No
DNAI1	1	0	1	1.11111	1	No
ENHO	1	0	1	1.11111	1	No
DCTN3	1	0	1	1.11111	1	No
ARID3C	1	0	1	1.11111	1	No
VCP	1	0	1	1.11111	1	No
RUSC2	1	0	1	1.11111	1	No
TESK1	0	1	1	1.11111	1	No
SIT1	1	0	1	1.11111	1	No
TPM2	1	0	1	1.11111	1	No
HINT2	1	0	1	1.11111	1	No
TMEM8B	1	0	1	1.11111	1	No
OR13J1	0	1	1	1.11111	1	No
GLIPR2	0	1	1	1.11111	1	No
CCIN	1	0	1	1.11111	1	No
GRHPR	1	0	1	1.11111	1	No
FBXO10	0	1	1	1.11111	1	No
OR4K15	3	0	3	1.0274	1	No
OR11G2	3	0	3	1.0274	1	No
GALNT16	3	0	3	1.0274	1	No
DCP1B	1	0	1	0.892857	1	No
ITFG2	1	0	1	0.892857	1	No
FGF23	1	0	1	0.892857	1	No
DYRK4	1	0	1	0.892857	1	No
AKAP3	1	0	1	0.892857	1	No
NDUFA9	1	0	1	0.892857	1	No
KCNA6	1	0	1	0.892857	1	No
CD9	1	0	1	0.892857	1	No
VAMP1	0	1	1	0.892857	1	No
NOP2	1	0	1	0.892857	1	No
ACRBP	1	0	1	0.892857	1	No
LAG3	1	0	1	0.892857	1	No
EMG1	0	1	1	0.892857	1	No
C1S	1	0	1	0.892857	1	No
APOBEC1	1	0	1	0.892857	1	No
FOXJ2	1	0	1	0.892857	1	No
C3AR1	1	0	1	0.892857	1	No
CLEC4D	1	0	1	0.892857	1	No
MFAP5	1	0	1	0.892857	1	No
M6PR	1	0	1	0.892857	1	No
KLRG1	1	0	1	0.892857	1	No
TMEM52B	1	0	1	0.892857	1	No
GABARAPL1	1	0	1	0.892857	1	No
KLRC4	1	0	1	0.892857	1	No
KLRC3	1	0	1	0.892857	1	No
KLRC2	1	0	1	0.892857	1	No
MAGOHB	1	0	1	0.892857	1	No
PRH1	0	1	1	0.892857	1	No
PRB1	0	1	1	0.892857	1	No
BCL2L14	0	1	1	0.892857	1	No
DUSP16	1	0	1	0.892857	1	No
APOLD1	1	0	1	0.892857	1	No
GPRC5A	1	0	1	0.892857	1	No
GPRC5D	1	0	1	0.892857	1	No
GSG1	1	0	1	0.892857	1	No
ATF7IP	1	0	1	0.892857	1	No
ERP27	1	0	1	0.892857	1	No
LMO3	1	0	1	0.892857	1	No
RERGL	1	0	1	0.892857	1	No
SLCO1A2	1	0	1	0.892857	1	No
IAPP	1	0	1	0.892857	1	No
GOLT1B	1	0	1	0.892857	1	No
KCNJ8	1	0	1	0.892857	1	No
BCAT1	1	0	1	0.892857	1	No
RASSF8	1	0	1	0.892857	1	No
REP15	1	0	1	0.892857	1	No
KLHL42	0	1	1	0.892857	1	No
PTHLH	1	0	1	0.892857	1	No
DENND5B	1	0	1	0.892857	1	No
AEBP2	0	1	1	0.892857	1	No
ERGIC2	0	1	1	0.892857	1	No
CSAD	2	0	2	0.829876	2	No
SLC48A1	2	0	2	0.829876	2	No
C1QL4	2	0	2	0.829876	2	No
DNAJC14	2	0	2	0.829876	2	No
KIF21A	2	0	2	0.829876	2	No
USP30	2	0	2	0.829876	2	No
RILPL2	2	0	2	0.829876	2	No
RAB35	2	0	2	0.829876	2	No
ALG10B	0	2	2	0.829876	2	No
PDZRN4	2	0	2	0.829876	1	No
ARF3	1	1	2	0.829876	1	No
ZNF740	2	0	2	0.829876	1	No
RARG	2	0	2	0.829876	1	No
LRIG3	2	0	2	0.829876	1	No
MBD6	2	0	2	0.829876	1	No
HCAR2	2	0	2	0.829876	1	No
KCNMB4	0	2	2	0.829876	1	No
ZMYND11	1	0	1	0.819672	1	No
KLF6	1	0	1	0.819672	1	No
AKR1E2	0	1	1	0.819672	1	No
CALML3	1	0	1	0.819672	1	No
ANKRD16	1	0	1	0.819672	1	No
IL15RA	0	1	1	0.819672	1	No
IL2RA	0	1	1	0.819672	1	No
KIN	0	1	1	0.819672	1	No
GATA3	1	0	1	0.819672	1	No
CELF2	1	0	1	0.819672	1	No
UPF2	1	0	1	0.819672	1	No
OPTN	1	0	1	0.819672	1	No
UCMA	1	0	1	0.819672	1	No
PHYH	1	0	1	0.819672	1	No
BEND7	0	1	1	0.819672	1	No
CDNF	0	1	1	0.819672	1	No
SUV39H2	1	0	1	0.819672	1	No
RPP38	0	1	1	0.819672	1	No
NMT2	0	1	1	0.819672	1	No
C1QL3	0	1	1	0.819672	1	No
RSU1	1	0	1	0.819672	1	No
CUBN	1	0	1	0.819672	1	No
VIM	1	0	1	0.819672	1	No
STAM	1	0	1	0.819672	1	No
MLLT10	0	1	1	0.819672	1	No
BMI1	1	0	1	0.819672	1	No
PIP4K2A	1	0	1	0.819672	1	No
ARMC3	0	1	1	0.819672	1	No
OTUD1	1	0	1	0.819672	1	No
ENKUR	1	0	1	0.819672	1	No
MYO3A	1	0	1	0.819672	1	No
ANKRD26	1	0	1	0.819672	1	No
RAB18	1	0	1	0.819672	1	No
WAC	1	0	1	0.819672	1	No
BAMBI	0	1	1	0.819672	1	No
LYZL1	1	0	1	0.819672	1	No
GJD4	0	1	1	0.819672	1	No
ZNF248	1	0	1	0.819672	1	No
UCN3	1	0	1	0.819672	1	No
MCM10	1	0	1	0.819672	1	No
FAM107B	1	0	1	0.819672	1	No
MASTL	1	0	1	0.819672	1	No
FZD8	1	0	1	0.819672	1	No
ZNF770	2	0	2	0.796813	2	No
MAPKBP1	1	1	2	0.796813	2	No
TRIM69	2	0	2	0.796813	2	No
AAGAB	2	0	2	0.796813	2	No
MAP2K5	2	0	2	0.796813	2	No
CLK3	2	0	2	0.796813	2	No
NGRN	2	0	2	0.796813	2	No
IQGAP1	1	1	2	0.796813	2	No
ADPGK	1	1	2	0.796813	2	No
EIF2AK4	2	0	2	0.796813	1	No
TRIP4	2	0	2	0.796813	1	No
UBE2Q2	0	2	2	0.796813	1	No
PSTPIP1	2	0	2	0.796813	1	No
NMB	2	0	2	0.796813	1	No
HAPLN3	2	0	2	0.796813	1	No
IDH2	2	0	2	0.796813	1	No
OR4F4	2	0	2	0.796813	1	No
EMB	1	0	1	0.704225	1	No
GZMA	0	1	1	0.704225	1	No
CCNO	1	0	1	0.704225	1	No
DHX29	1	0	1	0.704225	1	No
DDX4	1	0	1	0.704225	1	No
ACTBL2	1	0	1	0.704225	1	No
PDE4D	0	1	1	0.704225	1	No
ELOVL7	0	1	1	0.704225	1	No
SREK1IP1	1	0	1	0.704225	1	No
CD180	1	0	1	0.704225	1	No
CCNB1	1	0	1	0.704225	1	No
MRPS36	1	0	1	0.704225	1	No
BDP1	1	0	1	0.704225	1	No
CARTPT	1	0	1	0.704225	1	No
FCHO2	1	0	1	0.704225	1	No
BTF3	1	0	1	0.704225	1	No
POLK	1	0	1	0.704225	1	No
AGGF1	1	0	1	0.704225	1	No
BHMT	1	0	1	0.704225	1	No
HOMER1	1	0	1	0.704225	1	No
THBS4	1	0	1	0.704225	1	No
FAM151B	1	0	1	0.704225	1	No
ACOT12	0	1	1	0.704225	1	No
POU5F2	0	1	1	0.704225	1	No
RFESD	1	0	1	0.704225	1	No
GLRX	1	0	1	0.704225	1	No
PCSK1	1	0	1	0.704225	1	No
RGMB	1	0	1	0.704225	1	No
FER	1	0	1	0.704225	1	No
TSLP	1	0	1	0.704225	1	No
NREP	0	1	1	0.704225	1	No
DCP2	0	1	1	0.704225	1	No
TMED7	1	0	1	0.704225	1	No
ATG12	1	0	1	0.704225	1	No
SEMA6A	1	0	1	0.704225	1	No
LOX	1	0	1	0.704225	1	No
ZNF474	1	0	1	0.704225	1	No
SNX24	1	0	1	0.704225	1	No
PPIC	1	0	1	0.704225	1	No
CEP120	1	0	1	0.704225	1	No
PHAX	0	1	1	0.704225	1	No
PRRC1	1	0	1	0.704225	1	No
HINT1	0	1	1	0.704225	1	No
IL4	1	0	1	0.704225	1	No
FSTL4	1	0	1	0.704225	1	No
SKP1	1	0	1	0.704225	1	No
SAR1B	0	1	1	0.704225	1	No
TXNDC15	1	0	1	0.704225	1	No
SLC25A48	1	0	1	0.704225	1	No
SMAD5	1	0	1	0.704225	1	No
SPOCK1	1	0	1	0.704225	1	No
MYOT	1	0	1	0.704225	1	No
FAM53C	1	0	1	0.704225	1	No
LRRTM2	1	0	1	0.704225	1	No
NRG2	1	0	1	0.704225	1	No
HARS2	1	0	1	0.704225	1	No
PCDHA7	1	0	1	0.704225	1	No
PCDHAC2	1	0	1	0.704225	1	No
PCDHB13	1	0	1	0.704225	1	No
PCDHGA4	0	1	1	0.704225	1	No
PCDHGA12	1	0	1	0.704225	1	No
HDAC3	0	1	1	0.704225	1	No
RELL2	0	1	1	0.704225	1	No
NDFIP1	0	1	1	0.704225	1	No
NR3C1	0	1	1	0.704225	1	No
POU4F3	1	0	1	0.704225	1	No
DPYSL3	1	0	1	0.704225	1	No
GRPEL2	1	0	1	0.704225	1	No
PDE6A	1	0	1	0.704225	1	No
ARSI	0	1	1	0.704225	1	No
CD74	0	1	1	0.704225	1	No
IRGM	1	0	1	0.704225	1	No
ANXA6	0	1	1	0.704225	1	No
NMUR2	1	0	1	0.704225	1	No
GRIA1	1	0	1	0.704225	1	No
LARP1	1	0	1	0.704225	1	No
HAVCR2	1	0	1	0.704225	1	No
FAM71B	1	0	1	0.704225	1	No
C1QTNF2	1	0	1	0.704225	1	No
PTTG1	1	0	1	0.704225	1	No
ATP10B	1	0	1	0.704225	1	No
GABRB2	1	0	1	0.704225	1	No
GABRA6	1	0	1	0.704225	1	No
GABRA1	0	1	1	0.704225	1	No
GABRG2	1	0	1	0.704225	1	No
PNP	2	0	2	0.684932	2	No
C14orf93	2	0	2	0.684932	2	No
NOVA1	1	1	2	0.684932	2	No
FANCM	2	0	2	0.684932	2	No
ACOT4	2	0	2	0.684932	2	No
TGFB3	2	0	2	0.684932	2	No
IRF2BPL	1	1	2	0.684932	2	No
SPATA7	0	2	2	0.684932	2	No
KCNK13	2	0	2	0.684932	2	No
BTBD7	1	1	2	0.684932	2	No
SERPINA12	2	0	2	0.684932	2	No
SERPINA3	2	0	2	0.684932	2	No
ASPG	2	0	2	0.684932	2	No
CLBA1	1	1	2	0.684932	2	No
LRRC9	1	1	2	0.684932	2	No
POTEG	1	1	2	0.684932	1	No
CCNB1IP1	2	0	2	0.684932	1	No
RNASE2	0	2	2	0.684932	1	No
CDH24	2	0	2	0.684932	1	No
NFATC4	2	0	2	0.684932	1	No
FOXG1	2	0	2	0.684932	1	No
PELI2	1	1	2	0.684932	1	No
TTC9	2	0	2	0.684932	1	No
RGS6	1	1	2	0.684932	1	No
ZFYVE1	1	1	2	0.684932	1	No
CATSPERB	2	0	2	0.684932	1	No
TCL1B	2	0	2	0.684932	1	No
XRCC3	2	0	2	0.684932	1	No
C4orf19	1	0	1	0.613497	1	No
ADRA2C	1	0	1	0.613497	1	No
BEND4	0	1	1	0.613497	1	No
BOD1L1	1	0	1	0.613497	1	No
BST1	1	0	1	0.613497	1	No
EVC2	1	0	1	0.613497	1	No
GAK	1	0	1	0.613497	1	No
HS3ST1	1	0	1	0.613497	1	No
MXD4	1	0	1	0.613497	1	No
NELFA	1	0	1	0.613497	1	No
NKX1-1	1	0	1	0.613497	1	No
NWD2	1	0	1	0.613497	1	No
RBM47	1	0	1	0.613497	1	No
RBPJ	1	0	1	0.613497	1	No
ZAR1	1	0	1	0.613497	1	No
AADAT	1	0	1	0.613497	1	No
ADH7	1	0	1	0.613497	1	No
AP1AR	1	0	1	0.613497	1	No
ARFIP1	1	0	1	0.613497	1	No
ARHGAP24	1	0	1	0.613497	1	No
BBS7	1	0	1	0.613497	1	No
BMPR1B	1	0	1	0.613497	1	No
CFAP97	1	0	1	0.613497	1	No
EGF	1	0	1	0.613497	1	No
ELF2	1	0	1	0.613497	1	No
FAM13A	1	0	1	0.613497	1	No
GLRB	1	0	1	0.613497	1	No
GRIA2	1	0	1	0.613497	1	No
GSTCD	1	0	1	0.613497	1	No
HAND2	1	0	1	0.613497	1	No
MAML3	1	0	1	0.613497	1	No
METAP1	1	0	1	0.613497	1	No
NDST4	1	0	1	0.613497	1	No
NR3C2	1	0	1	0.613497	1	No
PDGFC	1	0	1	0.613497	1	No
PDHA2	1	0	1	0.613497	1	No
PITX2	1	0	1	0.613497	1	No
RAB33B	1	0	1	0.613497	1	No
SMARCA5	1	0	1	0.613497	1	No
SNCA	1	0	1	0.613497	1	No
TBC1D9	1	0	1	0.613497	1	No
TIGD2	1	0	1	0.613497	1	No
TLR3	1	0	1	0.613497	1	No
TMEM154	1	0	1	0.613497	1	No
TRAM1L1	1	0	1	0.613497	1	No
TRIML1	1	0	1	0.613497	1	No
WWC2	1	0	1	0.613497	1	No
ZGRF1	1	0	1	0.613497	1	No
LRPAP1	0	1	1	0.613497	1	No
OCIAD2	0	1	1	0.613497	1	No
PACRGL	0	1	1	0.613497	1	No
RAB28	0	1	1	0.613497	1	No
SH3BP2	0	1	1	0.613497	1	No
SLBP	0	1	1	0.613497	1	No
CCNA2	0	1	1	0.613497	1	No
F11	0	1	1	0.613497	1	No
HADH	0	1	1	0.613497	1	No
JADE1	0	1	1	0.613497	1	No
LAMTOR3	0	1	1	0.613497	1	No
LARP7	0	1	1	0.613497	1	No
MFAP3L	0	1	1	0.613497	1	No
MRPS18C	0	1	1	0.613497	1	No
SFRP2	0	1	1	0.613497	1	No
SLC25A31	0	1	1	0.613497	1	No
SNX25	0	1	1	0.613497	1	No
TIFA	0	1	1	0.613497	1	No
TMEM192	0	1	1	0.613497	1	No
GABRA2	0	1	1	0.613497	1	No
CPNE8	1	0	1	0.414938	1	No
ARID2	1	0	1	0.414938	1	No
AMIGO2	1	0	1	0.414938	1	No
PFKM	1	0	1	0.414938	1	No
ASB8	1	0	1	0.414938	1	No
ADCY6	1	0	1	0.414938	1	No
CCDC65	1	0	1	0.414938	1	No
FKBP11	1	0	1	0.414938	1	No
LMBR1L	1	0	1	0.414938	1	No
TUBA1C	1	0	1	0.414938	1	No
FAIM2	1	0	1	0.414938	1	No
LARP4	1	0	1	0.414938	1	No
KRT84	1	0	1	0.414938	1	No
KRT2	1	0	1	0.414938	1	No
KRT76	1	0	1	0.414938	1	No
KRT4	0	1	1	0.414938	1	No
KRT78	1	0	1	0.414938	1	No
PCBP2	0	1	1	0.414938	1	No
SMUG1	1	0	1	0.414938	1	No
ITGA5	1	0	1	0.414938	1	No
PDE1B	1	0	1	0.414938	1	No
PPP1R1A	1	0	1	0.414938	1	No
MYL6	1	0	1	0.414938	1	No
SLC39A5	1	0	1	0.414938	1	No
APOF	1	0	1	0.414938	1	No
SPRYD4	1	0	1	0.414938	1	No
BAZ2A	1	0	1	0.414938	1	No
ZBTB39	1	0	1	0.414938	1	No
PIP4K2C	1	0	1	0.414938	1	No
SLC26A10	1	0	1	0.414938	1	No
B4GALNT1	1	0	1	0.414938	1	No
SLC16A7	1	0	1	0.414938	1	No
LEMD3	1	0	1	0.414938	1	No
IFNG	1	0	1	0.414938	1	No
OSBPL8	1	0	1	0.414938	1	No
LIN7A	0	1	1	0.414938	1	No
CEP290	1	0	1	0.414938	1	No
POC1B	1	0	1	0.414938	1	No
CRADD	1	0	1	0.414938	1	No
SLC5A8	1	0	1	0.414938	1	No
CKAP4	1	0	1	0.414938	1	No
TMEM263	1	0	1	0.414938	1	No
ANAPC7	0	1	1	0.414938	1	No
RPH3A	1	0	1	0.414938	1	No
SLC8B1	1	0	1	0.414938	1	No
FBXW8	1	0	1	0.414938	1	No
KSR2	1	0	1	0.414938	1	No
WSB2	1	0	1	0.414938	1	No
CIT	1	0	1	0.414938	1	No
ANAPC5	1	0	1	0.414938	1	No
LRRC43	1	0	1	0.414938	1	No
DIABLO	1	0	1	0.414938	1	No
DNAH10	1	0	1	0.414938	1	No
MMP17	1	0	1	0.414938	1	No
GALNT9	1	0	1	0.414938	1	No
CSRNP2	1	0	1	0.414938	1	No
ATF7	1	0	1	0.414938	1	No
MMP19	1	0	1	0.414938	1	No
STAT2	1	0	1	0.414938	1	No
OS9	1	0	1	0.414938	1	No
CDK4	1	0	1	0.414938	1	No
CDK17	1	0	1	0.414938	1	No
ALDH1L2	1	0	1	0.414938	1	No
PUS7L	1	0	1	0.414938	1	No
ENDOU	1	0	1	0.414938	1	No
KRT5	1	0	1	0.414938	1	No
KRT8	1	0	1	0.414938	1	No
KRT18	1	0	1	0.414938	1	No
AAAS	1	0	1	0.414938	1	No
ESYT1	1	0	1	0.414938	1	No
SMARCC2	1	0	1	0.414938	1	No
C12orf56	1	0	1	0.414938	1	No
KERA	1	0	1	0.414938	1	No
BTG1	1	0	1	0.414938	1	No
CEP83	1	0	1	0.414938	1	No
NR2C1	1	0	1	0.414938	1	No
VEZT	1	0	1	0.414938	1	No
PARPBP	1	0	1	0.414938	1	No
NFYB	1	0	1	0.414938	1	No
CMKLR1	1	0	1	0.414938	1	No
SSH1	1	0	1	0.414938	1	No
UBE3B	1	0	1	0.414938	1	No
PEBP1	1	0	1	0.414938	1	No
ORAI1	1	0	1	0.414938	1	No
HCAR1	1	0	1	0.414938	1	No
ABCD2	1	0	1	0.414938	1	No
BIN2	1	0	1	0.414938	1	No
TAC3	1	0	1	0.414938	1	No
GLI1	1	0	1	0.414938	1	No
TSPAN31	1	0	1	0.414938	1	No
NTN4	1	0	1	0.414938	1	No
CCDC38	1	0	1	0.414938	1	No
IL23A	1	0	1	0.414938	1	No
RDH16	1	0	1	0.414938	1	No
CTDSP2	1	0	1	0.414938	1	No
DPY19L2	1	0	1	0.414938	1	No
GNS	1	0	1	0.414938	1	No
LLPH	1	0	1	0.414938	1	No
SYT1	1	0	1	0.414938	1	No
GALNT4	1	0	1	0.414938	1	No
SOCS2	1	0	1	0.414938	1	No
ASCL1	1	0	1	0.414938	1	No
PRDM4	1	0	1	0.414938	1	No
SLC15A4	1	0	1	0.414938	1	No
FBRSL1	1	0	1	0.414938	1	No
ADAMTS20	0	1	1	0.414938	1	No
NELL2	0	1	1	0.414938	1	No
SMARCD1	0	1	1	0.414938	1	No
ATP5MC2	0	1	1	0.414938	1	No
HSD17B6	0	1	1	0.414938	1	No
MYO1A	0	1	1	0.414938	1	No
PPFIA2	0	1	1	0.414938	1	No
DUSP6	0	1	1	0.414938	1	No
FGD6	0	1	1	0.414938	1	No
SELPLG	0	1	1	0.414938	1	No
FAM222A	0	1	1	0.414938	1	No
VPS33A	0	1	1	0.414938	1	No
SOAT2	1	0	1	0.414938	0	No
NIPA1	1	0	1	0.398406	1	No
OCA2	1	0	1	0.398406	1	No
KLF13	0	1	1	0.398406	1	No
OTUD7A	0	1	1	0.398406	1	No
GREM1	1	0	1	0.398406	1	No
FMN1	1	0	1	0.398406	1	No
SLC12A6	1	0	1	0.398406	1	No
GJD2	1	0	1	0.398406	1	No
TMCO5A	1	0	1	0.398406	1	No
GPR176	1	0	1	0.398406	1	No
BMF	1	0	1	0.398406	1	No
ANKRD63	1	0	1	0.398406	1	No
DISP2	0	1	1	0.398406	1	No
RMDN3	1	0	1	0.398406	1	No
GCHFR	1	0	1	0.398406	1	No
CHP1	1	0	1	0.398406	1	No
LTK	1	0	1	0.398406	1	No
MGA	1	0	1	0.398406	1	No
VPS39	0	1	1	0.398406	1	No
GANC	1	0	1	0.398406	1	No
CAPN3	1	0	1	0.398406	1	No
TMEM62	0	1	1	0.398406	1	No
CCNDBP1	1	0	1	0.398406	1	No
ADAL	1	0	1	0.398406	1	No
ZSCAN29	1	0	1	0.398406	1	No
PPIP5K1	1	0	1	0.398406	1	No
STRC	1	0	1	0.398406	1	No
CKMT1A	1	0	1	0.398406	1	No
PDIA3	0	1	1	0.398406	1	No
ELL3	1	0	1	0.398406	1	No
SERINC4	1	0	1	0.398406	1	No
CTDSPL2	1	0	1	0.398406	1	No
DUOXA2	1	0	1	0.398406	1	No
DUOXA1	1	0	1	0.398406	1	No
DUOX1	1	0	1	0.398406	1	No
CEP152	1	0	1	0.398406	1	No
COPS2	1	0	1	0.398406	1	No
GLDN	1	0	1	0.398406	1	No
SCG3	1	0	1	0.398406	1	No
TMOD2	0	1	1	0.398406	1	No
GNB5	1	0	1	0.398406	1	No
ONECUT1	1	0	1	0.398406	1	No
UNC13C	1	0	1	0.398406	1	No
PIGB	1	0	1	0.398406	1	No
CCPG1	1	0	1	0.398406	1	No
PYGO1	1	0	1	0.398406	1	No
PRTG	1	0	1	0.398406	1	No
MNS1	1	0	1	0.398406	1	No
LDHAL6B	1	0	1	0.398406	1	No
ICE2	1	0	1	0.398406	1	No
VPS13C	1	0	1	0.398406	1	No
C2CD4A	1	0	1	0.398406	1	No
LACTB	1	0	1	0.398406	1	No
RPS27L	1	0	1	0.398406	1	No
CA12	1	0	1	0.398406	1	No
USP3	1	0	1	0.398406	1	No
FBXL22	1	0	1	0.398406	1	No
ZNF609	1	0	1	0.398406	1	No
OAZ2	1	0	1	0.398406	1	No
PLEKHO2	1	0	1	0.398406	1	No
RASL12	1	0	1	0.398406	1	No
KBTBD13	1	0	1	0.398406	1	No
UBAP1L	1	0	1	0.398406	1	No
CILP	0	1	1	0.398406	1	No
PARP16	0	1	1	0.398406	1	No
HACD3	1	0	1	0.398406	1	No
RAB11A	1	0	1	0.398406	1	No
MEGF11	1	0	1	0.398406	1	No
MAP2K1	1	0	1	0.398406	1	No
LCTL	1	0	1	0.398406	1	No
SMAD6	1	0	1	0.398406	1	No
SKOR1	1	0	1	0.398406	1	No
PIAS1	1	0	1	0.398406	1	No
CALML4	1	0	1	0.398406	1	No
THSD4	1	0	1	0.398406	1	No
PARP6	1	0	1	0.398406	1	No
TMEM202	0	1	1	0.398406	1	No
ARIH1	1	0	1	0.398406	1	No
NPTN	1	0	1	0.398406	1	No
LOXL1	1	0	1	0.398406	1	No
CYP1A1	1	0	1	0.398406	1	No
CYP1A2	1	0	1	0.398406	1	No
ULK3	1	0	1	0.398406	1	No
FAM219B	1	0	1	0.398406	1	No
PTPN9	1	0	1	0.398406	1	No
ISL2	0	1	1	0.398406	1	No
SCAPER	1	0	1	0.398406	1	No
CIB2	1	0	1	0.398406	1	No
DNAJA4	1	0	1	0.398406	1	No
WDR61	1	0	1	0.398406	1	No
CRABP1	1	0	1	0.398406	1	No
IREB2	1	0	1	0.398406	1	No
CHRNA5	1	0	1	0.398406	1	No
CHRNB4	0	1	1	0.398406	1	No
CTSH	1	0	1	0.398406	1	No
RASGRF1	1	0	1	0.398406	1	No
BCL2A1	1	0	1	0.398406	1	No
ZFAND6	1	0	1	0.398406	1	No
CPEB1	1	0	1	0.398406	1	No
FSD2	1	0	1	0.398406	1	No
WHAMM	1	0	1	0.398406	1	No
C15orf40	1	0	1	0.398406	1	No
BNC1	0	1	1	0.398406	1	No
SEC11A	0	1	1	0.398406	1	No
ZNF592	1	0	1	0.398406	1	No
ALPK3	1	0	1	0.398406	1	No
SLC28A1	1	0	1	0.398406	1	No
NTRK3	1	0	1	0.398406	1	No
ACAN	1	0	1	0.398406	1	No
MESP1	1	0	1	0.398406	1	No
ZNF710	1	0	1	0.398406	1	No
CIB1	1	0	1	0.398406	1	No
GDPGP1	1	0	1	0.398406	1	No
SLCO3A1	1	0	1	0.398406	1	No
CHD2	1	0	1	0.398406	1	No
ARRDC4	1	0	1	0.398406	1	No
IGF1R	1	0	1	0.398406	1	No
LRRC28	1	0	1	0.398406	1	No
MEF2A	1	0	1	0.398406	1	No
LYSMD4	1	0	1	0.398406	1	No
ADAMTS17	0	1	1	0.398406	1	No
CERS3	1	0	1	0.398406	1	No
LRRK1	1	0	1	0.398406	1	No
TM2D3	1	0	1	0.398406	1	No
FRMD5	0	1	1	0.398406	1	No
SORD	0	1	1	0.398406	1	No
BLOC1S6	0	1	1	0.398406	1	No
PPIB	0	1	1	0.398406	1	No
ACSBG1	0	1	1	0.398406	1	No
ANPEP	0	1	1	0.398406	1	No
OR4N5	1	0	1	0.342466	1	No
TTC5	0	1	1	0.342466	1	No
RNASE9	1	0	1	0.342466	1	No
RNASE11	1	0	1	0.342466	1	No
ANG	1	0	1	0.342466	1	No
RNASE6	1	0	1	0.342466	1	No
METTL17	1	0	1	0.342466	1	No
TMEM253	1	0	1	0.342466	1	No
OR5AU1	1	0	1	0.342466	1	No
HNRNPC	1	0	1	0.342466	1	No
RAB2B	1	0	1	0.342466	1	No
OR10G3	1	0	1	0.342466	1	No
OR4E1	1	0	1	0.342466	1	No
LRP10	1	0	1	0.342466	1	No
ACIN1	1	0	1	0.342466	1	No
CEBPE	1	0	1	0.342466	1	No
SLC22A17	1	0	1	0.342466	1	No
MYH6	1	0	1	0.342466	1	No
AP1G2	1	0	1	0.342466	1	No
DHRS2	1	0	1	0.342466	1	No
DHRS4	1	0	1	0.342466	1	No
PCK2	1	0	1	0.342466	1	No
TSSK4	1	0	1	0.342466	1	No
NEDD8	1	0	1	0.342466	1	No
GMPR2	1	0	1	0.342466	1	No
SDR39U1	1	0	1	0.342466	1	No
CMA1	1	0	1	0.342466	1	No
CTSG	1	0	1	0.342466	1	No
GZMB	1	0	1	0.342466	1	No
G2E3	1	0	1	0.342466	1	No
STRN3	1	0	1	0.342466	1	No
INSM2	1	0	1	0.342466	1	No
BRMS1L	1	0	1	0.342466	1	No
PAX9	1	0	1	0.342466	1	No
FOXA1	1	0	1	0.342466	1	No
CLEC14A	1	0	1	0.342466	1	No
PNN	1	0	1	0.342466	1	No
MGAT2	0	1	1	0.342466	1	No
L2HGDH	1	0	1	0.342466	1	No
TRIM9	0	1	1	0.342466	1	No
CDKN3	1	0	1	0.342466	1	No
GCH1	1	0	1	0.342466	1	No
FBXO34	1	0	1	0.342466	1	No
ATG14	1	0	1	0.342466	1	No
AP5M1	1	0	1	0.342466	1	No
ARID4A	1	0	1	0.342466	1	No
TOMM20L	1	0	1	0.342466	1	No
DACT1	1	0	1	0.342466	1	No
GPR135	1	0	1	0.342466	1	No
AKAP5	1	0	1	0.342466	1	No
HSPA2	1	0	1	0.342466	1	No
PPP1R36	1	0	1	0.342466	1	No
PLEK2	1	0	1	0.342466	1	No
ZFP36L1	1	0	1	0.342466	1	No
SLC39A9	0	1	1	0.342466	1	No
SLC10A1	1	0	1	0.342466	1	No
SLC8A3	1	0	1	0.342466	1	No
SIPA1L1	0	1	1	0.342466	1	No
DCAF4	1	0	1	0.342466	1	No
RIOX1	1	0	1	0.342466	1	No
ACOT1	1	0	1	0.342466	1	No
MIDEAS	1	0	1	0.342466	1	No
COQ6	1	0	1	0.342466	1	No
ABCD4	1	0	1	0.342466	1	No
PROX2	1	0	1	0.342466	1	No
DLST	1	0	1	0.342466	1	No
RPS6KL1	1	0	1	0.342466	1	No
MLH3	1	0	1	0.342466	1	No
FOS	1	0	1	0.342466	1	No
GPATCH2L	1	0	1	0.342466	1	No
ZDHHC22	1	0	1	0.342466	1	No
NGB	0	1	1	0.342466	1	No
SAMD15	1	0	1	0.342466	1	No
DIO2	1	0	1	0.342466	1	No
CEP128	1	0	1	0.342466	1	No
STON2	1	0	1	0.342466	1	No
PTPN21	0	1	1	0.342466	1	No
CCDC88C	1	0	1	0.342466	1	No
TC2N	1	0	1	0.342466	1	No
FBLN5	1	0	1	0.342466	1	No
MOAP1	1	0	1	0.342466	1	No
UBR7	1	0	1	0.342466	1	No
UNC79	1	0	1	0.342466	1	No
IFI27	1	0	1	0.342466	1	No
SERPINA1	1	0	1	0.342466	1	No
SERPINA11	1	0	1	0.342466	1	No
SYNE3	1	0	1	0.342466	1	No
BDKRB1	1	0	1	0.342466	1	No
GSKIP	1	0	1	0.342466	1	No
AK7	1	0	1	0.342466	1	No
CCDC85C	1	0	1	0.342466	1	No
CYP46A1	1	0	1	0.342466	1	No
YY1	1	0	1	0.342466	1	No
RCOR1	1	0	1	0.342466	1	No
COA8	1	0	1	0.342466	1	No
PPP1R13B	1	0	1	0.342466	1	No
TDRD9	1	0	1	0.342466	1	No
ADSS1	1	0	1	0.342466	1	No
GPR132	1	0	1	0.342466	1	No
CRIP1	1	0	1	0.342466	1	No
LRFN5	0	1	1	0.342466	1	No
ATL1	0	1	1	0.342466	1	No
TTLL5	0	1	1	0.342466	1	No
PPP2R5C	0	1	1	0.342466	1	No
CGRRF1	0	1	1	0.342466	1	No
WDR89	0	1	1	0.342466	1	No
C14orf180	0	1	1	0.342466	1	No
GABRA4	0	0	0	0	0	No
ABLIM2	0	0	0	0	0	No
ACOX3	0	0	0	0	0	No
ADGRA3	0	0	0	0	0	No
AFAP1	0	0	0	0	0	No
ANAPC4	0	0	0	0	0	No
APBB2	0	0	0	0	0	No
ARAP2	0	0	0	0	0	No
ATP5ME	0	0	0	0	0	No
ATP8A1	0	0	0	0	0	No
BLOC1S4	0	0	0	0	0	No
C1QTNF7	0	0	0	0	0	No
CC2D2A	0	0	0	0	0	No
CCDC149	0	0	0	0	0	No
CCDC96	0	0	0	0	0	No
CCKAR	0	0	0	0	0	No
CD38	0	0	0	0	0	No
CFAP99	0	0	0	0	0	No
CHRNA9	0	0	0	0	0	No
CLNK	0	0	0	0	0	No
CLRN2	0	0	0	0	0	No
COMMD8	0	0	0	0	0	No
CORIN	0	0	0	0	0	No
COX7B2	0	0	0	0	0	No
CPEB2	0	0	0	0	0	No
CPLX1	0	0	0	0	0	No
CPZ	0	0	0	0	0	No
CRMP1	0	0	0	0	0	No
CTBP1	0	0	0	0	0	No
CWH43	0	0	0	0	0	No
CYTL1	0	0	0	0	0	No
KIAA0232	0	0	0	0	0	No
DEFB131A	0	0	0	0	0	No
DGKQ	0	0	0	0	0	No
DHX15	0	0	0	0	0	No
DOK7	0	0	0	0	0	No
DRD5	0	0	0	0	0	No
DTHD1	0	0	0	0	0	No
EVC	0	0	0	0	0	No
FAM114A1	0	0	0	0	0	No
FAM53A	0	0	0	0	0	No
FBXL5	0	0	0	0	0	No
FGFBP1	0	0	0	0	0	No
FGFR3	0	0	0	0	0	No
FGFRL1	0	0	0	0	0	No
GABRB1	0	0	0	0	0	No
GABRG1	0	0	0	0	0	No
C4orf48	0	0	0	0	0	No
GNPDA2	0	0	0	0	0	No
GRK4	0	0	0	0	0	No
GRPEL1	0	0	0	0	0	No
GUF1	0	0	0	0	0	No
HAUS3	0	0	0	0	0	No
HGFAC	0	0	0	0	0	No
HMX1	0	0	0	0	0	No
HTRA3	0	0	0	0	0	No
HTT	0	0	0	0	0	No
IDUA	0	0	0	0	0	No
JAKMIP1	0	0	0	0	0	No
KCNIP4	0	0	0	0	0	No
KCTD8	0	0	0	0	0	No
KLB	0	0	0	0	0	No
KLF3	0	0	0	0	0	No
KLHL5	0	0	0	0	0	No
LAP3	0	0	0	0	0	No
LCORL	0	0	0	0	0	No
LDB2	0	0	0	0	0	No
LETM1	0	0	0	0	0	No
LGI2	0	0	0	0	0	No
LIAS	0	0	0	0	0	No
LIMCH1	0	0	0	0	0	No
LYAR	0	0	0	0	0	No
MAEA	0	0	0	0	0	No
MAN2B2	0	0	0	0	0	No
MED28	0	0	0	0	0	No
MFSD10	0	0	0	0	0	No
MSANTD1	0	0	0	0	0	No
MSX1	0	0	0	0	0	No
N4BP2	0	0	0	0	0	No
NAT8L	0	0	0	0	0	No
NCAPG	0	0	0	0	0	No
NFXL1	0	0	0	0	0	No
NIPAL1	0	0	0	0	0	No
NKX3-2	0	0	0	0	0	No
NOP14	0	0	0	0	0	No
NSG1	0	0	0	0	0	No
NSUN7	0	0	0	0	0	No
OCIAD1	0	0	0	0	0	No
PCDH7	0	0	0	0	0	No
PCGF3	0	0	0	0	0	No
PDE6B	0	0	0	0	0	No
PDS5A	0	0	0	0	0	No
PGM2	0	0	0	0	0	No
PHOX2B	0	0	0	0	0	No
PI4K2B	0	0	0	0	0	No
PIGG	0	0	0	0	0	No
POLN	0	0	0	0	0	No
PPARGC1A	0	0	0	0	0	No
PPP2R2C	0	0	0	0	0	No
PROM1	0	0	0	0	0	No
PSAPL1	0	0	0	0	0	No
QDPR	0	0	0	0	0	No
RELL1	0	0	0	0	0	No
RFC1	0	0	0	0	0	No
RGS12	0	0	0	0	0	No
RHOH	0	0	0	0	0	No
RNF4	0	0	0	0	0	No
SEL1L3	0	0	0	0	0	No
SEPSECS	0	0	0	0	0	No
SH3TC1	0	0	0	0	0	No
SHISA3	0	0	0	0	0	No
SLAIN2	0	0	0	0	0	No
SLC10A4	0	0	0	0	0	No
SLC26A1	0	0	0	0	0	No
SLC2A9	0	0	0	0	0	No
SLC30A9	0	0	0	0	0	No
SLC34A2	0	0	0	0	0	No
SLIT2	0	0	0	0	0	No
SMIM14	0	0	0	0	0	No
SOD3	0	0	0	0	0	No
SORCS2	0	0	0	0	0	No
SPON2	0	0	0	0	0	No
STIM2	0	0	0	0	0	No
STK32B	0	0	0	0	0	No
STX18	0	0	0	0	0	No
TACC3	0	0	0	0	0	No
TADA2B	0	0	0	0	0	No
TAPT1	0	0	0	0	0	No
TBC1D14	0	0	0	0	0	No
TBC1D19	0	0	0	0	0	No
TBC1D1	0	0	0	0	0	No
TLR1	0	0	0	0	0	No
TLR6	0	0	0	0	0	No
TMEM128	0	0	0	0	0	No
TMEM129	0	0	0	0	0	No
TMEM156	0	0	0	0	0	No
TMEM175	0	0	0	0	0	No
TMEM33	0	0	0	0	0	No
TNIP2	0	0	0	0	0	No
TRMT44	0	0	0	0	0	No
TXK	0	0	0	0	0	No
UBE2K	0	0	0	0	0	No
UGDH	0	0	0	0	0	No
UVSSA	0	0	0	0	0	No
WDR19	0	0	0	0	0	No
WDR1	0	0	0	0	0	No
YIPF7	0	0	0	0	0	No
ZBTB49	0	0	0	0	0	No
ZCCHC4	0	0	0	0	0	No
ZNF518B	0	0	0	0	0	No
ZFYVE28	0	0	0	0	0	No
MRFAP1	0	0	0	0	0	No
RPL9	0	0	0	0	0	No
SMIM20	0	0	0	0	0	No
C4orf54	0	0	0	0	0	No
C4orf36	0	0	0	0	0	No
C4orf47	0	0	0	0	0	No
C4orf3	0	0	0	0	0	No
C4orf17	0	0	0	0	0	No
C4orf46	0	0	0	0	0	No
ABCE1	0	0	0	0	0	No
ABCG2	0	0	0	0	0	No
ACSL1	0	0	0	0	0	No
ADAD1	0	0	0	0	0	No
ADAM29	0	0	0	0	0	No
ADH4	0	0	0	0	0	No
ADH5	0	0	0	0	0	No
AFF1	0	0	0	0	0	No
AGA	0	0	0	0	0	No
ALPK1	0	0	0	0	0	No
ANAPC10	0	0	0	0	0	No
ANKRD37	0	0	0	0	0	No
ANXA10	0	0	0	0	0	No
ANXA5	0	0	0	0	0	No
APELA	0	0	0	0	0	No
ARHGAP10	0	0	0	0	0	No
ARHGEF38	0	0	0	0	0	No
ARSJ	0	0	0	0	0	No
ASIC5	0	0	0	0	0	No
ATOH1	0	0	0	0	0	No
BANK1	0	0	0	0	0	No
BBS12	0	0	0	0	0	No
BDH2	0	0	0	0	0	No
CAMK2D	0	0	0	0	0	No
CASP3	0	0	0	0	0	No
CASP6	0	0	0	0	0	No
CBR4	0	0	0	0	0	No
CCDC110	0	0	0	0	0	No
CCSER1	0	0	0	0	0	No
CDKN2AIP	0	0	0	0	0	No
CDS1	0	0	0	0	0	No
CENPE	0	0	0	0	0	No
CENPU	0	0	0	0	0	No
CEP44	0	0	0	0	0	No
CFI	0	0	0	0	0	No
CISD2	0	0	0	0	0	No
CLCN3	0	0	0	0	0	No
CLDN22	0	0	0	0	0	No
CLDN24	0	0	0	0	0	No
CLGN	0	0	0	0	0	No
COL25A1	0	0	0	0	0	No
COPS4	0	0	0	0	0	No
COQ2	0	0	0	0	0	No
CPE	0	0	0	0	0	No
CTSO	0	0	0	0	0	No
CXXC4	0	0	0	0	0	No
CYP2U1	0	0	0	0	0	No
CYP4V2	0	0	0	0	0	No
DAPP1	0	0	0	0	0	No
DCHS2	0	0	0	0	0	No
DCLK2	0	0	0	0	0	No
DCTD	0	0	0	0	0	No
DDIT4L	0	0	0	0	0	No
DDX60	0	0	0	0	0	No
DKK2	0	0	0	0	0	No
DMP1	0	0	0	0	0	No
DNAJB14	0	0	0	0	0	No
DSPP	0	0	0	0	0	No
EDNRA	0	0	0	0	0	No
EIF4E	0	0	0	0	0	No
ELMOD2	0	0	0	0	0	No
ELOVL6	0	0	0	0	0	No
EMCN	0	0	0	0	0	No
ENPEP	0	0	0	0	0	No
ENPP6	0	0	0	0	0	No
ETFDH	0	0	0	0	0	No
ETNPPL	0	0	0	0	0	No
EXOSC9	0	0	0	0	0	No
FABP2	0	0	0	0	0	No
FAM149A	0	0	0	0	0	No
FAM160A1	0	0	0	0	0	No
FAM198B	0	0	0	0	0	No
FAT1	0	0	0	0	0	No
FAT4	0	0	0	0	0	No
FBXO8	0	0	0	0	0	No
FGA	0	0	0	0	0	No
FGB	0	0	0	0	0	No
FGF2	0	0	0	0	0	No
FGG	0	0	0	0	0	No
FHDC1	0	0	0	0	0	No
FNIP2	0	0	0	0	0	No
FREM3	0	0	0	0	0	No
FRG1	0	0	0	0	0	No
FSTL5	0	0	0	0	0	No
GAB1	0	0	0	0	0	No
GALNTL6	0	0	0	0	0	No
GAR1	0	0	0	0	0	No
GATB	0	0	0	0	0	No
GLRA3	0	0	0	0	0	No
C4orf45	0	0	0	0	0	No
GPM6A	0	0	0	0	0	No
GPRIN3	0	0	0	0	0	No
GRID2	0	0	0	0	0	No
GYPA	0	0	0	0	0	No
H2AFZ	0	0	0	0	0	No
HELQ	0	0	0	0	0	No
HELT	0	0	0	0	0	No
HERC3	0	0	0	0	0	No
HERC6	0	0	0	0	0	No
HHIP	0	0	0	0	0	No
HPGD	0	0	0	0	0	No
HPGDS	0	0	0	0	0	No
HPSE	0	0	0	0	0	No
HSD17B11	0	0	0	0	0	No
HSD17B13	0	0	0	0	0	No
HSPA4L	0	0	0	0	0	No
IBSP	0	0	0	0	0	No
IL21	0	0	0	0	0	No
IL2	0	0	0	0	0	No
ING2	0	0	0	0	0	No
INPP4B	0	0	0	0	0	No
INTS12	0	0	0	0	0	No
IRF2	0	0	0	0	0	No
KLHL8	0	0	0	0	0	No
LARP1B	0	0	0	0	0	No
LEF1	0	0	0	0	0	No
LIN54	0	0	0	0	0	No
LRAT	0	0	0	0	0	No
LRBA	0	0	0	0	0	No
LRIT3	0	0	0	0	0	No
LRP2BP	0	0	0	0	0	No
MAB21L2	0	0	0	0	0	No
MAD2L1	0	0	0	0	0	No
MANBA	0	0	0	0	0	No
MAP9	0	0	0	0	0	No
MAPK10	0	0	0	0	0	No
MEPE	0	0	0	0	0	No
MFSD8	0	0	0	0	0	No
MGARP	0	0	0	0	0	No
MGAT4D	0	0	0	0	0	No
MGST2	0	0	0	0	0	No
MMAA	0	0	0	0	0	No
MMRN1	0	0	0	0	0	No
MND1	0	0	0	0	0	No
MSMO1	0	0	0	0	0	No
MTNR1A	0	0	0	0	0	No
MTTP	0	0	0	0	0	No
MYOZ2	0	0	0	0	0	No
NAA15	0	0	0	0	0	No
NAF1	0	0	0	0	0	No
NAP1L5	0	0	0	0	0	No
NDNF	0	0	0	0	0	No
NDUFC1	0	0	0	0	0	No
NEIL3	0	0	0	0	0	No
NEK1	0	0	0	0	0	No
NEUROG2	0	0	0	0	0	No
NFKB1	0	0	0	0	0	No
NKX6-1	0	0	0	0	0	No
NPNT	0	0	0	0	0	No
NPY1R	0	0	0	0	0	No
NPY2R	0	0	0	0	0	No
NUDT6	0	0	0	0	0	No
NUDT9	0	0	0	0	0	No
OSTC	0	0	0	0	0	No
OTUD4	0	0	0	0	0	No
PABPC4L	0	0	0	0	0	No
PALLD	0	0	0	0	0	No
PAPSS1	0	0	0	0	0	No
PCDH10	0	0	0	0	0	No
PCDH18	0	0	0	0	0	No
PDE5A	0	0	0	0	0	No
PDLIM3	0	0	0	0	0	No
PDLIM5	0	0	0	0	0	No
PGRMC2	0	0	0	0	0	No
PIGY	0	0	0	0	0	No
PKD2	0	0	0	0	0	No
PLA2G12A	0	0	0	0	0	No
PLAC8	0	0	0	0	0	No
PLRG1	0	0	0	0	0	No
POU4F2	0	0	0	0	0	No
PPA2	0	0	0	0	0	No
PPID	0	0	0	0	0	No
PPM1K	0	0	0	0	0	No
PPP3CA	0	0	0	0	0	No
PRDM5	0	0	0	0	0	No
PRIMPOL	0	0	0	0	0	No
PRSS12	0	0	0	0	0	No
PRSS48	0	0	0	0	0	No
PTPN13	0	0	0	0	0	No
PYURF	0	0	0	0	0	No
QRFPR	0	0	0	0	0	No
RAP1GDS1	0	0	0	0	0	No
RAPGEF2	0	0	0	0	0	No
RBM46	0	0	0	0	0	No
RNF150	0	0	0	0	0	No
RRH	0	0	0	0	0	No
RWDD4	0	0	0	0	0	No
RXFP1	0	0	0	0	0	No
SAP30	0	0	0	0	0	No
SCLT1	0	0	0	0	0	No
SCOC	0	0	0	0	0	No
SCRG1	0	0	0	0	0	No
SEC24B	0	0	0	0	0	No
SEC24D	0	0	0	0	0	No
SEC31A	0	0	0	0	0	No
SETD7	0	0	0	0	0	No
SGMS2	0	0	0	0	0	No
SH3D19	0	0	0	0	0	No
SH3RF1	0	0	0	0	0	No
SLC10A6	0	0	0	0	0	No
SLC25A4	0	0	0	0	0	No
SLC39A8	0	0	0	0	0	No
SLC7A11	0	0	0	0	0	No
SLC9B1	0	0	0	0	0	No
SLC9B2	0	0	0	0	0	No
SMAD1	0	0	0	0	0	No
SMARCAD1	0	0	0	0	0	No
SORBS2	0	0	0	0	0	No
SPARCL1	0	0	0	0	0	No
SPATA4	0	0	0	0	0	No
SPATA5	0	0	0	0	0	No
SPCS3	0	0	0	0	0	No
SPOCK3	0	0	0	0	0	No
SPP1	0	0	0	0	0	No
SPRY1	0	0	0	0	0	No
STOX2	0	0	0	0	0	No
STPG2	0	0	0	0	0	No
SYNPO2	0	0	0	0	0	No
TACR3	0	0	0	0	0	No
TBCK	0	0	0	0	0	No
TDO2	0	0	0	0	0	No
TENM3	0	0	0	0	0	No
TIGD4	0	0	0	0	0	No
TKTL2	0	0	0	0	0	No
TLL1	0	0	0	0	0	No
TMA16	0	0	0	0	0	No
TMEM144	0	0	0	0	0	No
TMEM184C	0	0	0	0	0	No
TNIP3	0	0	0	0	0	No
TRAPPC11	0	0	0	0	0	No
TRIM2	0	0	0	0	0	No
TRIML2	0	0	0	0	0	No
TRMT10A	0	0	0	0	0	No
TRPC3	0	0	0	0	0	No
TSPAN5	0	0	0	0	0	No
TTC29	0	0	0	0	0	No
UCP1	0	0	0	0	0	No
UFSP2	0	0	0	0	0	No
UGT8	0	0	0	0	0	No
UNC5C	0	0	0	0	0	No
USP53	0	0	0	0	0	No
VEGFC	0	0	0	0	0	No
WDFY3	0	0	0	0	0	No
ZNF827	0	0	0	0	0	No
HMGB2	0	0	0	0	0	No
2024-03-01	0	0	0	0	0	No
RPL34	0	0	0	0	0	No
RPS3A	0	0	0	0	0	No
PARP8	0	0	0	0	0	No
ISL1	0	0	0	0	0	No
ITGA1	0	0	0	0	0	No
PELO	0	0	0	0	0	No
ITGA2	0	0	0	0	0	No
MOCS2	0	0	0	0	0	No
FST	0	0	0	0	0	No
NDUFS4	0	0	0	0	0	No
ARL15	0	0	0	0	0	No
HSPB3	0	0	0	0	0	No
SNX18	0	0	0	0	0	No
ESM1	0	0	0	0	0	No
GZMK	0	0	0	0	0	No
CDC20B	0	0	0	0	0	No
GPX8	0	0	0	0	0	No
MCIDAS	0	0	0	0	0	No
SLC38A9	0	0	0	0	0	No
IL31RA	0	0	0	0	0	No
IL6ST	0	0	0	0	0	No
ANKRD55	0	0	0	0	0	No
MAP3K1	0	0	0	0	0	No
MIER3	0	0	0	0	0	No
GPBP1	0	0	0	0	0	No
PLK2	0	0	0	0	0	No
GAPT	0	0	0	0	0	No
RAB3C	0	0	0	0	0	No
DEPDC1B	0	0	0	0	0	No
ERCC8	0	0	0	0	0	No
NDUFAF2	0	0	0	0	0	No
SMIM15	0	0	0	0	0	No
ZSWIM6	0	0	0	0	0	No
KIF2A	0	0	0	0	0	No
DIMT1	0	0	0	0	0	No
IPO11	0	0	0	0	0	No
HTR1A	0	0	0	0	0	No
RNF180	0	0	0	0	0	No
RGS7BP	0	0	0	0	0	No
CWC27	0	0	0	0	0	No
ADAMTS6	0	0	0	0	0	No
CENPK	0	0	0	0	0	No
PPWD1	0	0	0	0	0	No
TRIM23	0	0	0	0	0	No
TRAPPC13	0	0	0	0	0	No
SGTB	0	0	0	0	0	No
NLN	0	0	0	0	0	No
SREK1	0	0	0	0	0	No
MAST4	0	0	0	0	0	No
PIK3R1	0	0	0	0	0	No
SLC30A5	0	0	0	0	0	No
CENPH	0	0	0	0	0	No
CDK7	0	0	0	0	0	No
CCDC125	0	0	0	0	0	No
AK6	0	0	0	0	0	No
TAF9	0	0	0	0	0	No
RAD17	0	0	0	0	0	No
MARVELD2	0	0	0	0	0	No
OCLN	0	0	0	0	0	No
SERF1A	0	0	0	0	0	No
SMN1	0	0	0	0	0	No
MCCC2	0	0	0	0	0	No
MAP1B	0	0	0	0	0	No
MRPS27	0	0	0	0	0	No
PTCD2	0	0	0	0	0	No
ZNF366	0	0	0	0	0	No
TNPO1	0	0	0	0	0	No
TMEM171	0	0	0	0	0	No
TMEM174	0	0	0	0	0	No
FOXD1	0	0	0	0	0	No
ANKRA2	0	0	0	0	0	No
UTP15	0	0	0	0	0	No
ARHGEF28	0	0	0	0	0	No
ENC1	0	0	0	0	0	No
HEXB	0	0	0	0	0	No
GFM2	0	0	0	0	0	No
NSA2	0	0	0	0	0	No
FAM169A	0	0	0	0	0	No
GCNT4	0	0	0	0	0	No
HMGCR	0	0	0	0	0	No
COL4A3BP	0	0	0	0	0	No
ANKDD1B	0	0	0	0	0	No
POC5	0	0	0	0	0	No
SV2C	0	0	0	0	0	No
IQGAP2	0	0	0	0	0	No
F2RL2	0	0	0	0	0	No
F2R	0	0	0	0	0	No
F2RL1	0	0	0	0	0	No
S100Z	0	0	0	0	0	No
CRHBP	0	0	0	0	0	No
ZBED3	0	0	0	0	0	No
PDE8B	0	0	0	0	0	No
WDR41	0	0	0	0	0	No
OTP	0	0	0	0	0	No
TBCA	0	0	0	0	0	No
AP3B1	0	0	0	0	0	No
SCAMP1	0	0	0	0	0	No
LHFPL2	0	0	0	0	0	No
ARSB	0	0	0	0	0	No
DMGDH	0	0	0	0	0	No
BHMT2	0	0	0	0	0	No
JMY	0	0	0	0	0	No
CMYA5	0	0	0	0	0	No
MTX3	0	0	0	0	0	No
SERINC5	0	0	0	0	0	No
SPZ1	0	0	0	0	0	No
ZFYVE16	0	0	0	0	0	No
ANKRD34B	0	0	0	0	0	No
MSH3	0	0	0	0	0	No
RASGRF2	0	0	0	0	0	No
CKMT2	0	0	0	0	0	No
ZCCHC9	0	0	0	0	0	No
ATG10	0	0	0	0	0	No
ATP6AP1L	0	0	0	0	0	No
TMEM167A	0	0	0	0	0	No
XRCC4	0	0	0	0	0	No
VCAN	0	0	0	0	0	No
HAPLN1	0	0	0	0	0	No
EDIL3	0	0	0	0	0	No
RASA1	0	0	0	0	0	No
CCNH	0	0	0	0	0	No
TMEM161B	0	0	0	0	0	No
CETN3	0	0	0	0	0	No
MBLAC2	0	0	0	0	0	No
POLR3G	0	0	0	0	0	No
LYSMD3	0	0	0	0	0	No
ADGRV1	0	0	0	0	0	No
ARRDC3	0	0	0	0	0	No
NR2F1	0	0	0	0	0	No
FAM172A	0	0	0	0	0	No
MCTP1	0	0	0	0	0	No
TTC37	0	0	0	0	0	No
ARSK	0	0	0	0	0	No
GPR150	0	0	0	0	0	No
SPATA9	0	0	0	0	0	No
RHOBTB3	0	0	0	0	0	No
ELL2	0	0	0	0	0	No
CAST	0	0	0	0	0	No
ERAP1	0	0	0	0	0	No
LNPEP	0	0	0	0	0	No
LIX1	0	0	0	0	0	No
CHD1	0	0	0	0	0	No
FAM174A	0	0	0	0	0	No
ST8SIA4	0	0	0	0	0	No
SLCO4C1	0	0	0	0	0	No
PAM	0	0	0	0	0	No
GIN1	0	0	0	0	0	No
PPIP5K2	0	0	0	0	0	No
C5orf30	0	0	0	0	0	No
NUDT12	0	0	0	0	0	No
EFNA5	0	0	0	0	0	No
FBXL17	0	0	0	0	0	No
PJA2	0	0	0	0	0	No
MAN2A1	0	0	0	0	0	No
TMEM232	0	0	0	0	0	No
SLC25A46	0	0	0	0	0	No
WDR36	0	0	0	0	0	No
CAMK4	0	0	0	0	0	No
STARD4	0	0	0	0	0	No
SRP19	0	0	0	0	0	No
REEP5	0	0	0	0	0	No
MCC	0	0	0	0	0	No
TSSK1B	0	0	0	0	0	No
YTHDC2	0	0	0	0	0	No
TRIM36	0	0	0	0	0	No
PGGT1B	0	0	0	0	0	No
CCDC112	0	0	0	0	0	No
FEM1C	0	0	0	0	0	No
TICAM2	0	0	0	0	0	No
CDO1	0	0	0	0	0	No
AP3S1	0	0	0	0	0	No
LVRN	0	0	0	0	0	No
ARL14EPL	0	0	0	0	0	No
COMMD10	0	0	0	0	0	No
DTWD2	0	0	0	0	0	No
DMXL1	0	0	0	0	0	No
TNFAIP8	0	0	0	0	0	No
HSD17B4	0	0	0	0	0	No
FAM170A	0	0	0	0	0	No
PRR16	0	0	0	0	0	No
FTMT	0	0	0	0	0	No
SRFBP1	0	0	0	0	0	No
SNCAIP	0	0	0	0	0	No
SNX2	0	0	0	0	0	No
PRDM6	0	0	0	0	0	No
CSNK1G3	0	0	0	0	0	No
ZNF608	0	0	0	0	0	No
GRAMD2B	0	0	0	0	0	No
ALDH7A1	0	0	0	0	0	No
TEX43	0	0	0	0	0	No
LMNB1	0	0	0	0	0	No
2024-03-03	0	0	0	0	0	No
C5orf63	0	0	0	0	0	No
MEGF10	0	0	0	0	0	No
CTXN3	0	0	0	0	0	No
SLC12A2	0	0	0	0	0	No
FBN2	0	0	0	0	0	No
SLC27A6	0	0	0	0	0	No
ISOC1	0	0	0	0	0	No
ADAMTS19	0	0	0	0	0	No
CHSY3	0	0	0	0	0	No
LYRM7	0	0	0	0	0	No
CDC42SE2	0	0	0	0	0	No
RAPGEF6	0	0	0	0	0	No
FNIP1	0	0	0	0	0	No
MEIKIN	0	0	0	0	0	No
ACSL6	0	0	0	0	0	No
IL3	0	0	0	0	0	No
CSF2	0	0	0	0	0	No
P4HA2	0	0	0	0	0	No
PDLIM4	0	0	0	0	0	No
SLC22A4	0	0	0	0	0	No
SLC22A5	0	0	0	0	0	No
IRF1	0	0	0	0	0	No
IL5	0	0	0	0	0	No
RAD50	0	0	0	0	0	No
IL13	0	0	0	0	0	No
KIF3A	0	0	0	0	0	No
2024-09-08	0	0	0	0	0	No
SOWAHA	0	0	0	0	0	No
SHROOM1	0	0	0	0	0	No
GDF9	0	0	0	0	0	No
UQCRQ	0	0	0	0	0	No
LEAP2	0	0	0	0	0	No
AFF4	0	0	0	0	0	No
ZCCHC10	0	0	0	0	0	No
HSPA4	0	0	0	0	0	No
C5orf15	0	0	0	0	0	No
VDAC1	0	0	0	0	0	No
PPP2CA	0	0	0	0	0	No
CDKL3	0	0	0	0	0	No
UBE2B	0	0	0	0	0	No
CDKN2AIPNL	0	0	0	0	0	No
JADE2	0	0	0	0	0	No
SEC24A	0	0	0	0	0	No
CAMLG	0	0	0	0	0	No
DDX46	0	0	0	0	0	No
C5orf24	0	0	0	0	0	No
PCBD2	0	0	0	0	0	No
CATSPER3	0	0	0	0	0	No
PITX1	0	0	0	0	0	No
H2AFY	0	0	0	0	0	No
TIFAB	0	0	0	0	0	No
NEUROG1	0	0	0	0	0	No
CXCL14	0	0	0	0	0	No
IL9	0	0	0	0	0	No
LECT2	0	0	0	0	0	No
TGFBI	0	0	0	0	0	No
TRPC7	0	0	0	0	0	No
KLHL3	0	0	0	0	0	No
HNRNPA0	0	0	0	0	0	No
PKD2L2	0	0	0	0	0	No
FAM13B	0	0	0	0	0	No
WNT8A	0	0	0	0	0	No
NME5	0	0	0	0	0	No
BRD8	0	0	0	0	0	No
KIF20A	0	0	0	0	0	No
CDC23	0	0	0	0	0	No
CDC25C	0	0	0	0	0	No
KDM3B	0	0	0	0	0	No
REEP2	0	0	0	0	0	No
EGR1	0	0	0	0	0	No
ETF1	0	0	0	0	0	No
HSPA9	0	0	0	0	0	No
CTNNA1	0	0	0	0	0	No
SIL1	0	0	0	0	0	No
MATR3	0	0	0	0	0	No
PAIP2	0	0	0	0	0	No
SLC23A1	0	0	0	0	0	No
MZB1	0	0	0	0	0	No
PROB1	0	0	0	0	0	No
SPATA24	0	0	0	0	0	No
DNAJC18	0	0	0	0	0	No
ECSCR	0	0	0	0	0	No
SMIM33	0	0	0	0	0	No
TMEM173	0	0	0	0	0	No
UBE2D2	0	0	0	0	0	No
CXXC5	0	0	0	0	0	No
PSD2	0	0	0	0	0	No
PURA	0	0	0	0	0	No
CYSTM1	0	0	0	0	0	No
PFDN1	0	0	0	0	0	No
HBEGF	0	0	0	0	0	No
ANKHD1	0	0	0	0	0	No
SRA1	0	0	0	0	0	No
EIF4EBP3	0	0	0	0	0	No
SLC35A4	0	0	0	0	0	No
CD14	0	0	0	0	0	No
NDUFA2	0	0	0	0	0	No
TMCO6	0	0	0	0	0	No
IK	0	0	0	0	0	No
WDR55	0	0	0	0	0	No
DND1	0	0	0	0	0	No
HARS	0	0	0	0	0	No
ZMAT2	0	0	0	0	0	No
PCDHA1	0	0	0	0	0	No
PCDHA2	0	0	0	0	0	No
PCDHA3	0	0	0	0	0	No
PCDHA5	0	0	0	0	0	No
PCDHA6	0	0	0	0	0	No
PCDHA8	0	0	0	0	0	No
PCDHA9	0	0	0	0	0	No
PCDHA11	0	0	0	0	0	No
PCDHAC1	0	0	0	0	0	No
PCDHB1	0	0	0	0	0	No
PCDHB2	0	0	0	0	0	No
PCDHB3	0	0	0	0	0	No
PCDHB4	0	0	0	0	0	No
PCDHB5	0	0	0	0	0	No
PCDHB6	0	0	0	0	0	No
PCDHB7	0	0	0	0	0	No
PCDHB8	0	0	0	0	0	No
PCDHB16	0	0	0	0	0	No
PCDHB9	0	0	0	0	0	No
PCDHB10	0	0	0	0	0	No
PCDHB11	0	0	0	0	0	No
PCDHB12	0	0	0	0	0	No
PCDHB14	0	0	0	0	0	No
PCDHB15	0	0	0	0	0	No
TAF7	0	0	0	0	0	No
SLC25A2	0	0	0	0	0	No
PCDHGA1	0	0	0	0	0	No
PCDHGA2	0	0	0	0	0	No
PCDHGA3	0	0	0	0	0	No
PCDHGB1	0	0	0	0	0	No
PCDHGB2	0	0	0	0	0	No
PCDHGA5	0	0	0	0	0	No
PCDHGA6	0	0	0	0	0	No
PCDHGA7	0	0	0	0	0	No
PCDHGB4	0	0	0	0	0	No
PCDHGA8	0	0	0	0	0	No
PCDHGB5	0	0	0	0	0	No
PCDHGA9	0	0	0	0	0	No
PCDHGB6	0	0	0	0	0	No
PCDHGA10	0	0	0	0	0	No
PCDHGB7	0	0	0	0	0	No
PCDHGA11	0	0	0	0	0	No
PCDHGC3	0	0	0	0	0	No
PCDHGC5	0	0	0	0	0	No
FCHSD1	0	0	0	0	0	No
ARAP3	0	0	0	0	0	No
PCDH1	0	0	0	0	0	No
PCDH12	0	0	0	0	0	No
RNF14	0	0	0	0	0	No
GNPDA1	0	0	0	0	0	No
SPRY4	0	0	0	0	0	No
FGF1	0	0	0	0	0	No
ARHGAP26	0	0	0	0	0	No
YIPF5	0	0	0	0	0	No
KCTD16	0	0	0	0	0	No
PRELID2	0	0	0	0	0	No
GRXCR2	0	0	0	0	0	No
SH3RF2	0	0	0	0	0	No
PLAC8L1	0	0	0	0	0	No
LARS	0	0	0	0	0	No
RBM27	0	0	0	0	0	No
TCERG1	0	0	0	0	0	No
GPR151	0	0	0	0	0	No
PPP2R2B	0	0	0	0	0	No
STK32A	0	0	0	0	0	No
JAKMIP2	0	0	0	0	0	No
SPINK1	0	0	0	0	0	No
SCGB3A2	0	0	0	0	0	No
C5orf46	0	0	0	0	0	No
SPINK5	0	0	0	0	0	No
SPINK14	0	0	0	0	0	No
SPINK6	0	0	0	0	0	No
SPINK13	0	0	0	0	0	No
SPINK7	0	0	0	0	0	No
SPINK9	0	0	0	0	0	No
FBXO38	0	0	0	0	0	No
HTR4	0	0	0	0	0	No
SH3TC2	0	0	0	0	0	No
ABLIM3	0	0	0	0	0	No
AFAP1L1	0	0	0	0	0	No
PCYOX1L	0	0	0	0	0	No
IL17B	0	0	0	0	0	No
ARHGEF37	0	0	0	0	0	No
PPARGC1B	0	0	0	0	0	No
SLC26A2	0	0	0	0	0	No
HMGXB3	0	0	0	0	0	No
CSF1R	0	0	0	0	0	No
PDGFRB	0	0	0	0	0	No
CDX1	0	0	0	0	0	No
SLC6A7	0	0	0	0	0	No
CAMK2A	0	0	0	0	0	No
TCOF1	0	0	0	0	0	No
RPS14	0	0	0	0	0	No
SYNPO	0	0	0	0	0	No
MYOZ3	0	0	0	0	0	No
RBM22	0	0	0	0	0	No
DCTN4	0	0	0	0	0	No
SMIM3	0	0	0	0	0	No
GPX3	0	0	0	0	0	No
TNIP1	0	0	0	0	0	No
CCDC69	0	0	0	0	0	No
GM2A	0	0	0	0	0	No
SLC36A2	0	0	0	0	0	No
SLC36A1	0	0	0	0	0	No
FAT2	0	0	0	0	0	No
SPARC	0	0	0	0	0	No
ATOX1	0	0	0	0	0	No
G3BP1	0	0	0	0	0	No
GLRA1	0	0	0	0	0	No
FAM114A2	0	0	0	0	0	No
GALNT10	0	0	0	0	0	No
SAP30L	0	0	0	0	0	No
HAND1	0	0	0	0	0	No
CNOT8	0	0	0	0	0	No
MRPL22	0	0	0	0	0	No
SGCD	0	0	0	0	0	No
PPP1R2B	0	0	0	0	0	No
TIMD4	0	0	0	0	0	No
HAVCR1	0	0	0	0	0	No
MED7	0	0	0	0	0	No
ITK	0	0	0	0	0	No
CYFIP2	0	0	0	0	0	No
FNDC9	0	0	0	0	0	No
ADAM19	0	0	0	0	0	No
NIPAL4	0	0	0	0	0	No
SOX30	0	0	0	0	0	No
C5orf52	0	0	0	0	0	No
THG1L	0	0	0	0	0	No
LSM11	0	0	0	0	0	No
CLINT1	0	0	0	0	0	No
EBF1	0	0	0	0	0	No
RNF145	0	0	0	0	0	No
UBLCP1	0	0	0	0	0	No
IL12B	0	0	0	0	0	No
ADRA1B	0	0	0	0	0	No
TTC1	0	0	0	0	0	No
PWWP2A	0	0	0	0	0	No
FABP6	0	0	0	0	0	No
CCNJL	0	0	0	0	0	No
SLU7	0	0	0	0	0	No
CCNG1	0	0	0	0	0	No
NUDCD2	0	0	0	0	0	No
HMMR	0	0	0	0	0	No
MAT2B	0	0	0	0	0	No
TENM2	0	0	0	0	0	No
WWC1	0	0	0	0	0	No
RARS	0	0	0	0	0	No
FBLL1	0	0	0	0	0	No
PANK3	0	0	0	0	0	No
SLIT3	0	0	0	0	0	No
GFOD1	0	0	0	0	0	No
IRF4	0	0	0	0	0	No
EXOC2	0	0	0	0	0	No
HUS1B	0	0	0	0	0	No
FOXQ1	0	0	0	0	0	No
GMDS	0	0	0	0	0	No
MYLK4	0	0	0	0	0	No
WRNIP1	0	0	0	0	0	No
SERPINB1	0	0	0	0	0	No
SERPINB9	0	0	0	0	0	No
SERPINB6	0	0	0	0	0	No
NQO2	0	0	0	0	0	No
RIPK1	0	0	0	0	0	No
BPHL	0	0	0	0	0	No
TUBB2A	0	0	0	0	0	No
TUBB2B	0	0	0	0	0	No
PSMG4	0	0	0	0	0	No
SLC22A23	0	0	0	0	0	No
FAM50B	0	0	0	0	0	No
PRPF4B	0	0	0	0	0	No
FAM217A	0	0	0	0	0	No
ECI2	0	0	0	0	0	No
LYRM4	0	0	0	0	0	No
FARS2	0	0	0	0	0	No
NRN1	0	0	0	0	0	No
F13A1	0	0	0	0	0	No
RREB1	0	0	0	0	0	No
SSR1	0	0	0	0	0	No
CAGE1	0	0	0	0	0	No
RIOK1	0	0	0	0	0	No
DSP	0	0	0	0	0	No
SNRNP48	0	0	0	0	0	No
BMP6	0	0	0	0	0	No
TXNDC5	0	0	0	0	0	No
BLOC1S5	0	0	0	0	0	No
EEF1E1	0	0	0	0	0	No
SLC35B3	0	0	0	0	0	No
GCNT2	0	0	0	0	0	No
PAK1IP1	0	0	0	0	0	No
TMEM14C	0	0	0	0	0	No
MAK	0	0	0	0	0	No
GCM2	0	0	0	0	0	No
SYCP2L	0	0	0	0	0	No
ELOVL2	0	0	0	0	0	No
ERVFRD-1	0	0	0	0	0	No
NEDD9	0	0	0	0	0	No
TMEM170B	0	0	0	0	0	No
HIVEP1	0	0	0	0	0	No
EDN1	0	0	0	0	0	No
PHACTR1	0	0	0	0	0	No
TBC1D7	0	0	0	0	0	No
SIRT5	0	0	0	0	0	No
NOL7	0	0	0	0	0	No
MCUR1	0	0	0	0	0	No
RNF182	0	0	0	0	0	No
CD83	0	0	0	0	0	No
JARID2	0	0	0	0	0	No
DTNBP1	0	0	0	0	0	No
MYLIP	0	0	0	0	0	No
GMPR	0	0	0	0	0	No
ATXN1	0	0	0	0	0	No
STMND1	0	0	0	0	0	No
RBM24	0	0	0	0	0	No
CAP2	0	0	0	0	0	No
NUP153	0	0	0	0	0	No
NHLRC1	0	0	0	0	0	No
TPMT	0	0	0	0	0	No
KDM1B	0	0	0	0	0	No
DEK	0	0	0	0	0	No
RNF144B	0	0	0	0	0	No
ID4	0	0	0	0	0	No
MBOAT1	0	0	0	0	0	No
CDKAL1	0	0	0	0	0	No
SOX4	0	0	0	0	0	No
PRL	0	0	0	0	0	No
HDGFL1	0	0	0	0	0	No
NRSN1	0	0	0	0	0	No
DCDC2	0	0	0	0	0	No
MRS2	0	0	0	0	0	No
GPLD1	0	0	0	0	0	No
ALDH5A1	0	0	0	0	0	No
KIAA0319	0	0	0	0	0	No
TDP2	0	0	0	0	0	No
ACOT13	0	0	0	0	0	No
C6orf62	0	0	0	0	0	No
GMNN	0	0	0	0	0	No
SCGN	0	0	0	0	0	No
SLC17A4	0	0	0	0	0	No
SLC17A1	0	0	0	0	0	No
SLC17A3	0	0	0	0	0	No
SLC17A2	0	0	0	0	0	No
H3C1	0	0	0	0	0	No
H3C2	0	0	0	0	0	No
H2AC4	0	0	0	0	0	No
H3C3	0	0	0	0	0	No
HFE	0	0	0	0	0	No
H2BC5	0	0	0	0	0	No
H2BC6	0	0	0	0	0	No
H4C5	0	0	0	0	0	No
H2BC8	0	0	0	0	0	No
H2AC8	0	0	0	0	0	No
H3C8	0	0	0	0	0	No
H2BC10	0	0	0	0	0	No
BTN2A2	0	0	0	0	0	No
BTN1A1	0	0	0	0	0	No
ABT1	0	0	0	0	0	No
ZNF322	0	0	0	0	0	No
PRSS16	0	0	0	0	0	No
POM121L2	0	0	0	0	0	No
ZNF184	0	0	0	0	0	No
H3C10	0	0	0	0	0	No
H2AC16	0	0	0	0	0	No
H3C11	0	0	0	0	0	No
H4C13	0	0	0	0	0	No
H3C12	0	0	0	0	0	No
H2BC17	0	0	0	0	0	No
OR2B2	0	0	0	0	0	No
ZKSCAN8	0	0	0	0	0	No
ZKSCAN4	0	0	0	0	0	No
NKAPL	0	0	0	0	0	No
ZSCAN26	0	0	0	0	0	No
PGBD1	0	0	0	0	0	No
ZKSCAN3	0	0	0	0	0	No
ZSCAN12	0	0	0	0	0	No
GPX6	0	0	0	0	0	No
GPX5	0	0	0	0	0	No
TRIM27	0	0	0	0	0	No
OR2J1	0	0	0	0	0	No
OR2J3	0	0	0	0	0	No
OR2J2	0	0	0	0	0	No
OR12D3	0	0	0	0	0	No
OR11A1	0	0	0	0	0	No
UBD	0	0	0	0	0	No
GABBR1	0	0	0	0	0	No
MOG	0	0	0	0	0	No
HLA-G	0	0	0	0	0	No
PPP1R11	0	0	0	0	0	No
RNF39	0	0	0	0	0	No
TRIM31	0	0	0	0	0	No
TRIM40	0	0	0	0	0	No
TRIM10	0	0	0	0	0	No
TRIM15	0	0	0	0	0	No
TRIM39	0	0	0	0	0	No
RPP21	0	0	0	0	0	No
HLA-E	0	0	0	0	0	No
GNL1	0	0	0	0	0	No
PRR3	0	0	0	0	0	No
PPP1R10	0	0	0	0	0	No
ATAT1	0	0	0	0	0	No
DHX16	0	0	0	0	0	No
PPP1R18	0	0	0	0	0	No
NRM	0	0	0	0	0	No
MDC1	0	0	0	0	0	No
IER3	0	0	0	0	0	No
DDR1	0	0	0	0	0	No
GTF2H4	0	0	0	0	0	No
VARS2	0	0	0	0	0	No
SFTA2	0	0	0	0	0	No
C6orf15	0	0	0	0	0	No
CDSN	0	0	0	0	0	No
PSORS1C2	0	0	0	0	0	No
CCHCR1	0	0	0	0	0	No
TCF19	0	0	0	0	0	No
HLA-C	0	0	0	0	0	No
HLA-B	0	0	0	0	0	No
MICA	0	0	0	0	0	No
MICB	0	0	0	0	0	No
DDX39B	0	0	0	0	0	No
NFKBIL1	0	0	0	0	0	No
LTA	0	0	0	0	0	No
TNF	0	0	0	0	0	No
LTB	0	0	0	0	0	No
LST1	0	0	0	0	0	No
AIF1	0	0	0	0	0	No
PRRC2A	0	0	0	0	0	No
BAG6	0	0	0	0	0	No
APOM	0	0	0	0	0	No
GPANK1	0	0	0	0	0	No
CSNK2B	0	0	0	0	0	No
LY6G5B	0	0	0	0	0	No
LY6G5C	0	0	0	0	0	No
ABHD16A	0	0	0	0	0	No
LY6G6F	0	0	0	0	0	No
LY6G6E	0	0	0	0	0	No
LY6G6D	0	0	0	0	0	No
LY6G6C	0	0	0	0	0	No
DDAH2	0	0	0	0	0	No
SAPCD1	0	0	0	0	0	No
VWA7	0	0	0	0	0	No
VARS1	0	0	0	0	0	No
LSM2	0	0	0	0	0	No
HSPA1L	0	0	0	0	0	No
HSPA1A	0	0	0	0	0	No
HSPA1B	0	0	0	0	0	No
NEU1	0	0	0	0	0	No
SLC44A4	0	0	0	0	0	No
EHMT2	0	0	0	0	0	No
C2	0	0	0	0	0	No
ZBTB12	0	0	0	0	0	No
CFB	0	0	0	0	0	No
NELFE	0	0	0	0	0	No
SKIV2L	0	0	0	0	0	No
DXO	0	0	0	0	0	No
STK19	0	0	0	0	0	No
C4B	0	0	0	0	0	No
CYP21A2	0	0	0	0	0	No
TNXB	0	0	0	0	0	No
ATF6B	0	0	0	0	0	No
FKBPL	0	0	0	0	0	No
PPT2	0	0	0	0	0	No
EGFL8	0	0	0	0	0	No
AGPAT1	0	0	0	0	0	No
RNF5	0	0	0	0	0	No
AGER	0	0	0	0	0	No
PBX2	0	0	0	0	0	No
GPSM3	0	0	0	0	0	No
NOTCH4	0	0	0	0	0	No
TSBP1	0	0	0	0	0	No
BTNL2	0	0	0	0	0	No
HLA-DRB5	0	0	0	0	0	No
HLA-DRB1	0	0	0	0	0	No
HLA-DQB1	0	0	0	0	0	No
HLA-DQA2	0	0	0	0	0	No
HLA-DQB2	0	0	0	0	0	No
HLA-DOB	0	0	0	0	0	No
TAP2	0	0	0	0	0	No
PSMB8	0	0	0	0	0	No
PSMB9	0	0	0	0	0	No
TAP1	0	0	0	0	0	No
HLA-DMB	0	0	0	0	0	No
BRD2	0	0	0	0	0	No
HLA-DOA	0	0	0	0	0	No
COL11A2	0	0	0	0	0	No
HSD17B8	0	0	0	0	0	No
RING1	0	0	0	0	0	No
VPS52	0	0	0	0	0	No
RPS18	0	0	0	0	0	No
B3GALT4	0	0	0	0	0	No
WDR46	0	0	0	0	0	No
RGL2	0	0	0	0	0	No
TAPBP	0	0	0	0	0	No
DAXX	0	0	0	0	0	No
KIFC1	0	0	0	0	0	No
PHF1	0	0	0	0	0	No
CUTA	0	0	0	0	0	No
SYNGAP1	0	0	0	0	0	No
ZBTB9	0	0	0	0	0	No
BAK1	0	0	0	0	0	No
ITPR3	0	0	0	0	0	No
UQCC2	0	0	0	0	0	No
IP6K3	0	0	0	0	0	No
LEMD2	0	0	0	0	0	No
GRM4	0	0	0	0	0	No
HMGA1	0	0	0	0	0	No
NUDT3	0	0	0	0	0	No
SPDEF	0	0	0	0	0	No
SNRPC	0	0	0	0	0	No
UHRF1BP1	0	0	0	0	0	No
TAF11	0	0	0	0	0	No
ANKS1A	0	0	0	0	0	No
SCUBE3	0	0	0	0	0	No
ZNF76	0	0	0	0	0	No
PPARD	0	0	0	0	0	No
FANCE	0	0	0	0	0	No
[truncated: 1,753 more rows]
