# Supplementary material for: Aneuploidy drives the acquisition of cancer-specific driver genes
Source: Research Square preprint supplement (doi:10.21203/rs.3.rs-4941895/v1), 2024-09-04
Supplement: Supplementary file 9 [file f0084ecf9bc54bf7e8c259e0.xlsx]

## Sheet: Enriched (sgFbxw7 vs sgSHL)
GroupID	Category	Term	Description	LogP	Log(q-value)	Genes	Symbols	InTerm_InList
1_Summary	GO Biological Processes	GO:0030198	extracellular matrix organization	-12.2853	-8.45057	11595,12815,12821,12824,14219,17183,17300,17395,18383,20289,20319,22370,50706,56429,57764,64075,67573,74199,77794,118453,229595,234911,240725,271127,320712,399558,546144,16664,16688,63873,72948,74127,109052,110308,223650,223917,233199,239673,677884	Acan,Col11a2,Col17a1,Col2a1,Ccn2,Matn4,Foxc1,Mmp9,Tnfrsf11b,Scx,Sfrp2,Vtn,Postn,Dpt,Ntn4,Smoc1,Loxl4,Vit,Adamtsl2,Mmp28,Adamtsl4,Mmp27,Sulf1,Adamts16,Abi3bp,Flrt2,Wdr72,Krt14,Krt6b,Trpv4,Tppp,Krt80,Krt75,Krt5,Eppk1,Krt79,Mybpc2,Krt90,Pakap	39/-
1_Member	GO Biological Processes	GO:0030198	extracellular matrix organization	-12.2853	-8.45057	11595,12815,12821,12824,14219,17183,17300,17395,18383,20289,20319,22370,50706,56429,57764,64075,67573,74199,77794,118453,229595,234911,240725,271127,320712,399558,546144	Acan,Col11a2,Col17a1,Col2a1,Ccn2,Matn4,Foxc1,Mmp9,Tnfrsf11b,Scx,Sfrp2,Vtn,Postn,Dpt,Ntn4,Smoc1,Loxl4,Vit,Adamtsl2,Mmp28,Adamtsl4,Mmp27,Sulf1,Adamts16,Abi3bp,Flrt2,Wdr72	27/278
1_Member	GO Biological Processes	GO:0045229	external encapsulating structure organization	-12.248	-8.45057	11595,12815,12821,12824,14219,17183,17300,17395,18383,20289,20319,22370,50706,56429,57764,64075,67573,74199,77794,118453,229595,234911,240725,271127,320712,399558,546144	Acan,Col11a2,Col17a1,Col2a1,Ccn2,Matn4,Foxc1,Mmp9,Tnfrsf11b,Scx,Sfrp2,Vtn,Postn,Dpt,Ntn4,Smoc1,Loxl4,Vit,Adamtsl2,Mmp28,Adamtsl4,Mmp27,Sulf1,Adamts16,Abi3bp,Flrt2,Wdr72	27/279
1_Member	GO Biological Processes	GO:0043062	extracellular structure organization	-12.2108	-8.45057	11595,12815,12821,12824,14219,17183,17300,17395,18383,20289,20319,22370,50706,56429,57764,64075,67573,74199,77794,118453,229595,234911,240725,271127,320712,399558,546144	Acan,Col11a2,Col17a1,Col2a1,Ccn2,Matn4,Foxc1,Mmp9,Tnfrsf11b,Scx,Sfrp2,Vtn,Postn,Dpt,Ntn4,Smoc1,Loxl4,Vit,Adamtsl2,Mmp28,Adamtsl4,Mmp27,Sulf1,Adamts16,Abi3bp,Flrt2,Wdr72	27/280
1_Member	GO Biological Processes	GO:0030199	collagen fibril organization	-5.22373	-2.88095	11595,12815,12824,17300,20289,20319,56429,67573	Acan,Col11a2,Col2a1,Foxc1,Scx,Sfrp2,Dpt,Loxl4	8/57
1_Member	GO Biological Processes	GO:0097435	supramolecular fiber organization	-2.87677	-1.0743	11595,12815,12824,14219,16664,16688,17300,20289,20319,56429,63873,67573,72948,74127,109052,110308,223650,223917,233199,239673,677884	Acan,Col11a2,Col2a1,Ccn2,Krt14,Krt6b,Foxc1,Scx,Sfrp2,Dpt,Trpv4,Loxl4,Tppp,Krt80,Krt75,Krt5,Eppk1,Krt79,Mybpc2,Krt90,Pakap	21/581
2_Summary	GO Biological Processes	GO:0008544	epidermis development	-12.1104	-8.45057	12023,12394,12399,12614,13836,14160,14284,14632,16001,16173,16535,16600,16664,16688,19206,22409,22410,64929,66042,73750,74127,107515,107586,109052,110308,223917,232174,239673,270893,317653,12142,12156,12161,12571,12945,15901,19692,226999,229595,223650,259277,626834	Barx2,Runx1,Runx3,Celsr1,Epha2,Lgr5,Fosl2,Gli1,Igf1r,Il18,Kcnq1,Klf4,Krt14,Krt6b,Ptch1,Wnt10a,Wnt10b,Scel,Sostdc1,Whrn,Krt80,Lgr4,Ovol2,Krt75,Krt5,Krt79,Cyp26b1,Krt90,Tmem132e,Klk14,Prdm1,Bmp2,Bmp6,Cdk6,Dmbt1,Id1,Reg1,Slc9a2,Adamtsl4,Eppk1,Klk8,Klk13	42/-
2_Member	GO Biological Processes	GO:0008544	epidermis development	-12.1104	-8.45057	12023,12394,12399,12614,13836,14160,14284,14632,16001,16173,16535,16600,16664,16688,19206,22409,22410,64929,66042,73750,74127,107515,107586,109052,110308,223917,232174,239673,270893,317653	Barx2,Runx1,Runx3,Celsr1,Epha2,Lgr5,Fosl2,Gli1,Igf1r,Il18,Kcnq1,Klf4,Krt14,Krt6b,Ptch1,Wnt10a,Wnt10b,Scel,Sostdc1,Whrn,Krt80,Lgr4,Ovol2,Krt75,Krt5,Krt79,Cyp26b1,Krt90,Tmem132e,Klk14	30/352
2_Member	GO Biological Processes	GO:0043588	skin development	-7.55613	-4.72564	12023,12394,12399,12614,13836,14160,14284,16173,16600,16664,16688,22409,22410,64929,66042,74127,107515,109052,110308,223917,232174,239673	Barx2,Runx1,Runx3,Celsr1,Epha2,Lgr5,Fosl2,Il18,Klf4,Krt14,Krt6b,Wnt10a,Wnt10b,Scel,Sostdc1,Krt80,Lgr4,Krt75,Krt5,Krt79,Cyp26b1,Krt90	22/310
2_Member	GO Biological Processes	GO:0009913	epidermal cell differentiation	-7.45834	-4.64364	13836,14284,14632,16535,16600,16664,16688,19206,64929,73750,74127,107586,109052,110308,223917,232174,239673,270893	Epha2,Fosl2,Gli1,Kcnq1,Klf4,Krt14,Krt6b,Ptch1,Scel,Whrn,Krt80,Ovol2,Krt75,Krt5,Krt79,Cyp26b1,Krt90,Tmem132e	18/212
2_Member	GO Biological Processes	GO:0030855	epithelial cell differentiation	-5.37906	-2.99856	12142,12156,12161,12571,12945,13836,14284,14632,15901,16535,16600,16664,16688,19206,19692,22410,64929,66042,73750,74127,107586,109052,110308,223917,226999,229595,232174,239673,270893	Prdm1,Bmp2,Bmp6,Cdk6,Dmbt1,Epha2,Fosl2,Gli1,Id1,Kcnq1,Klf4,Krt14,Krt6b,Ptch1,Reg1,Wnt10b,Scel,Sostdc1,Whrn,Krt80,Ovol2,Krt75,Krt5,Krt79,Slc9a2,Adamtsl4,Cyp26b1,Krt90,Tmem132e	29/654
2_Member	GO Biological Processes	GO:0030216	keratinocyte differentiation	-4.64679	-2.42236	13836,14284,16664,16688,64929,74127,109052,110308,223917,232174,239673	Epha2,Fosl2,Krt14,Krt6b,Scel,Krt80,Krt75,Krt5,Krt79,Cyp26b1,Krt90	11/134
2_Member	GO Biological Processes	GO:0045109	intermediate filament organization	-4.29063	-2.14272	16664,16688,74127,109052,110308,223650,223917,239673	Krt14,Krt6b,Krt80,Krt75,Krt5,Eppk1,Krt79,Krt90	8/76
2_Member	GO Biological Processes	GO:0031424	keratinization	-4.15457	-2.0326	16688,74127,109052,110308,223917,232174,239673	Krt6b,Krt80,Krt75,Krt5,Krt79,Cyp26b1,Krt90	7/59
2_Member	Reactome Gene Sets	R-MMU-6809371	Formation of the cornified envelope	-4.12997	-2.01568	16664,74127,109052,110308,223917,259277,317653,626834	Krt14,Krt80,Krt75,Krt5,Krt79,Klk8,Klk14,Klk13	8/80
2_Member	GO Biological Processes	GO:0045104	intermediate filament cytoskeleton organization	-3.60511	-1.61276	16664,16688,74127,109052,110308,223650,223917,239673	Krt14,Krt6b,Krt80,Krt75,Krt5,Eppk1,Krt79,Krt90	8/95
2_Member	GO Biological Processes	GO:0045103	intermediate filament-based process	-3.57382	-1.58828	16664,16688,74127,109052,110308,223650,223917,239673	Krt14,Krt6b,Krt80,Krt75,Krt5,Eppk1,Krt79,Krt90	8/96
2_Member	Reactome Gene Sets	R-MMU-6805567	Keratinization	-2.37727	-0.728192	16664,74127,109052,110308,223917,259277,317653,626834	Krt14,Krt80,Krt75,Krt5,Krt79,Klk8,Klk14,Klk13	8/147
3_Summary	GO Biological Processes	GO:0002062	chondrocyte differentiation	-10.2458	-6.68287	11595,12156,12393,12394,12399,12815,12824,14219,14284,20289,20319,20679,69121,213053,240725,12023,12161,12643,13836,17002,17300,17395,18295,21859,21922,22410,63873,77583,99929,232174,233781,238377,11539,11555,11600,17063,23959,73750,11826,13615,16535,16590,21367,21929,58801,107515	Acan,Bmp2,Runx2,Runx1,Runx3,Col11a2,Col2a1,Ccn2,Fosl2,Scx,Sfrp2,Sox6,Chrdl2,Slc39a14,Sulf1,Barx2,Bmp6,Chad,Epha2,Ltf,Foxc1,Mmp9,Ogn,Timp3,Clec3b,Wnt10b,Trpv4,Notum,Tiparp,Cyp26b1,Xylt1,Gpr68,Adora1,Adrb2,Angpt1,Muc13,Nt5e,Whrn,Aqp1,Edn2,Kcnq1,Kit,Cntn2,Tnfaip3,Pmaip1,Lgr4	46/-
3_Member	GO Biological Processes	GO:0002062	chondrocyte differentiation	-10.2458	-6.68287	11595,12156,12393,12394,12399,12815,12824,14219,14284,20289,20319,20679,69121,213053,240725	Acan,Bmp2,Runx2,Runx1,Runx3,Col11a2,Col2a1,Ccn2,Fosl2,Scx,Sfrp2,Sox6,Chrdl2,Slc39a14,Sulf1	15/92
3_Member	GO Biological Processes	GO:0001501	skeletal system development	-9.07677	-5.66335	11595,12023,12156,12161,12393,12394,12399,12643,12815,12824,13836,14219,14284,17002,17300,17395,18295,20289,20319,20679,21859,21922,22410,63873,69121,77583,99929,213053,232174,233781,238377,240725	Acan,Barx2,Bmp2,Bmp6,Runx2,Runx1,Runx3,Chad,Col11a2,Col2a1,Epha2,Ccn2,Fosl2,Ltf,Foxc1,Mmp9,Ogn,Scx,Sfrp2,Sox6,Timp3,Clec3b,Wnt10b,Trpv4,Chrdl2,Notum,Tiparp,Slc39a14,Cyp26b1,Xylt1,Gpr68,Sulf1	32/525
3_Member	GO Biological Processes	GO:0051216	cartilage development	-9.02211	-5.66335	11595,12023,12156,12161,12393,12394,12399,12815,12824,14219,14284,18295,20289,20319,20679,63873,69121,213053,240725	Acan,Barx2,Bmp2,Bmp6,Runx2,Runx1,Runx3,Col11a2,Col2a1,Ccn2,Fosl2,Ogn,Scx,Sfrp2,Sox6,Trpv4,Chrdl2,Slc39a14,Sulf1	19/190
3_Member	GO Biological Processes	GO:0061448	connective tissue development	-6.88009	-4.1623	11595,12023,12156,12161,12393,12394,12399,12815,12824,14219,14284,18295,20289,20319,20679,63873,69121,213053,240725	Acan,Barx2,Bmp2,Bmp6,Runx2,Runx1,Runx3,Col11a2,Col2a1,Ccn2,Fosl2,Ogn,Scx,Sfrp2,Sox6,Trpv4,Chrdl2,Slc39a14,Sulf1	19/257
3_Member	GO Biological Processes	GO:0060348	bone development	-6.4048	-3.84478	12156,12161,12393,12643,12824,14284,17002,17300,18295,20289,21859,63873,77583,232174,233781,238377,240725	Bmp2,Bmp6,Runx2,Chad,Col2a1,Fosl2,Ltf,Foxc1,Ogn,Scx,Timp3,Trpv4,Notum,Cyp26b1,Xylt1,Gpr68,Sulf1	17/223
3_Member	GO Biological Processes	GO:0048705	skeletal system morphogenesis	-4.8655	-2.59927	11595,12023,12161,12393,12815,12824,14219,14284,17002,17300,20289,20679,22410,63873,99929,232174	Acan,Barx2,Bmp6,Runx2,Col11a2,Col2a1,Ccn2,Fosl2,Ltf,Foxc1,Scx,Sox6,Wnt10b,Trpv4,Tiparp,Cyp26b1	16/260
3_Member	GO Biological Processes	GO:0060349	bone morphogenesis	-3.89203	-1.82711	12161,12393,12824,14284,17002,17300,20289,63873,232174	Bmp6,Runx2,Col2a1,Fosl2,Ltf,Foxc1,Scx,Trpv4,Cyp26b1	9/110
3_Member	GO Biological Processes	GO:0060350	endochondral bone morphogenesis	-3.75892	-1.73006	12161,12393,12824,14284,17300,20289,63873	Bmp6,Runx2,Col2a1,Fosl2,Foxc1,Scx,Trpv4	7/68
3_Member	GO Biological Processes	GO:0001958	endochondral ossification	-3.37494	-1.43941	12161,12393,12824,17300,20289	Bmp6,Runx2,Col2a1,Foxc1,Scx	5/37
3_Member	GO Biological Processes	GO:0036075	replacement ossification	-3.37494	-1.43941	12161,12393,12824,17300,20289	Bmp6,Runx2,Col2a1,Foxc1,Scx	5/37
3_Member	GO Biological Processes	GO:0001894	tissue homeostasis	-3.0765	-1.21494	11539,11555,11600,12815,12824,14219,14284,17063,17300,20289,23959,73750	Adora1,Adrb2,Angpt1,Col11a2,Col2a1,Ccn2,Fosl2,Muc13,Foxc1,Scx,Nt5e,Whrn	12/234
3_Member	GO Biological Processes	GO:0060249	anatomical structure homeostasis	-3.0765	-1.21494	11539,11555,11600,12815,12824,14219,14284,17063,17300,20289,23959,73750	Adora1,Adrb2,Angpt1,Col11a2,Col2a1,Ccn2,Fosl2,Muc13,Foxc1,Scx,Nt5e,Whrn	12/234
3_Member	GO Biological Processes	GO:0048871	multicellular organismal-level homeostasis	-2.23339	-0.62763	11539,11555,11600,11826,12161,12815,12824,13615,14219,14284,16535,16590,17063,17300,20289,20679,21367,21929,23959,58801,63873,73750,107515	Adora1,Adrb2,Angpt1,Aqp1,Bmp6,Col11a2,Col2a1,Edn2,Ccn2,Fosl2,Kcnq1,Kit,Muc13,Foxc1,Scx,Sox6,Cntn2,Tnfaip3,Nt5e,Pmaip1,Trpv4,Whrn,Lgr4	23/746
4_Summary	GO Biological Processes	GO:0008285	negative regulation of cell population proliferation	-9.67213	-6.18842	11539,11815,12156,12394,12399,12519,12571,12778,14283,16600,17395,18018,18295,19206,19252,19283,19692,19737,20319,21807,21859,21929,22062,22403,22410,22436,50768,56429,57277,58801,66214,93695,107586,110532,194655,223650,240725,320712,329278,433938,434215,15901,16173,18383,20308,20357,20679,63873,65079,66042,68027,74645,216616,238377,100042493	Adora1,Apod,Bmp2,Runx1,Runx3,Cd80,Cdk6,Ackr3,Fosl1,Klf4,Mmp9,Nfatc1,Ogn,Ptch1,Dusp1,Ptprz1,Reg1,Rgs5,Sfrp2,Tsc22d1,Timp3,Tnfaip3,Trp73,Ccn5,Wnt10b,Xdh,Dlc1,Dpt,Slurp1,Pmaip1,Rgcc,Gpnmb,Ovol2,Adarb1,Klf11,Eppk1,Sulf1,Abi3bp,Tnn,Mn1,Lrrc32,Id1,Il18,Tnfrsf11b,Ccl9,Sema5b,Sox6,Trpv4,Rtn4r,Sostdc1,Tmem178,Tent5c,Efemp1,Gpr68,Ccl21b	55/-
4_Member	GO Biological Processes	GO:0008285	negative regulation of cell population proliferation	-9.67213	-6.18842	11539,11815,12156,12394,12399,12519,12571,12778,14283,16600,17395,18018,18295,19206,19252,19283,19692,19737,20319,21807,21859,21929,22062,22403,22410,22436,50768,56429,57277,58801,66214,93695,107586,110532,194655,223650,240725,320712,329278,433938,434215	Adora1,Apod,Bmp2,Runx1,Runx3,Cd80,Cdk6,Ackr3,Fosl1,Klf4,Mmp9,Nfatc1,Ogn,Ptch1,Dusp1,Ptprz1,Reg1,Rgs5,Sfrp2,Tsc22d1,Timp3,Tnfaip3,Trp73,Ccn5,Wnt10b,Xdh,Dlc1,Dpt,Slurp1,Pmaip1,Rgcc,Gpnmb,Ovol2,Adarb1,Klf11,Eppk1,Sulf1,Abi3bp,Tnn,Mn1,Lrrc32	41/772
4_Member	GO Biological Processes	GO:0045596	negative regulation of cell differentiation	-3.8038	-1.75823	12156,12394,12399,12571,15901,16173,17395,18018,18383,19206,20308,20319,20357,20679,21807,22062,22410,22436,63873,65079,66042,68027,74645,107586,216616,238377,329278,100042493	Bmp2,Runx1,Runx3,Cdk6,Id1,Il18,Mmp9,Nfatc1,Tnfrsf11b,Ptch1,Ccl9,Sfrp2,Sema5b,Sox6,Tsc22d1,Trp73,Wnt10b,Xdh,Trpv4,Rtn4r,Sostdc1,Tmem178,Tent5c,Ovol2,Efemp1,Gpr68,Tnn,Ccl21b	28/759
5_Summary	GO Biological Processes	GO:0040017	positive regulation of locomotion	-8.94957	-5.64196	11600,11826,11876,12156,12778,13615,13836,14257,14343,14632,15200,16001,16173,16590,16803,17395,18003,18829,19283,19285,19713,20357,22370,22419,24047,26903,50706,55985,63873,80982,93695,114332,232983,100039789,100040035,100042493,12182,17965,19252,118453,13123,18187,20305,20308,65079,66793,107515,237847,11539,11815,20266,11555,12266,14219,16475,16706,18212,18584,22062,22436,81799,93834,19152,1590…	Angpt1,Aqp1,Artn,Bmp2,Ackr3,Edn2,Epha2,Flt4,Fut1,Gli1,Hbegf,Igf1r,Il18,Kit,Lbp,Mmp9,Nedd9,Ccl21a,Ptprz1,Cavin1,Ret,Sema5b,Vtn,Wnt5b,Ccl19,Dysf,Postn,Cxcl13,Trpv4,Cemip,Gpnmb,Lyve1,Cxcl17,Gm12407,Ccl19-ps4,Ccl21b,Bst1,Nbl1,Dusp1,Mmp28,Cyp7b1,Nrp2,Ccl6,Ccl9,Rtn4r,Clxn,Lgr4,Rtn4rl1,Adora1,Apod,Scn1b,Adrb2,C3,Ccn2,Ajuba,Ksr1,Ntrk2,Pde8a,Trp73,Xdh,C1qtnf3,Peli2,Prtn3,Id1,Klf4,Sfrp2,Cyp26b1,Foxc1,Nts,A…	112/-
5_Member	GO Biological Processes	GO:0040017	positive regulation of locomotion	-8.94957	-5.64196	11600,11826,11876,12156,12778,13615,13836,14257,14343,14632,15200,16001,16173,16590,16803,17395,18003,18829,19283,19285,19713,20357,22370,22419,24047,26903,50706,55985,63873,80982,93695,114332,232983,100039789,100040035,100042493	Angpt1,Aqp1,Artn,Bmp2,Ackr3,Edn2,Epha2,Flt4,Fut1,Gli1,Hbegf,Igf1r,Il18,Kit,Lbp,Mmp9,Nedd9,Ccl21a,Ptprz1,Cavin1,Ret,Sema5b,Vtn,Wnt5b,Ccl19,Dysf,Postn,Cxcl13,Trpv4,Cemip,Gpnmb,Lyve1,Cxcl17,Gm12407,Ccl19-ps4,Ccl21b	36/654
5_Member	GO Biological Processes	GO:2000147	positive regulation of cell motility	-8.67391	-5.53204	11600,11826,12156,12778,13615,13836,14257,14343,14632,15200,16001,16173,16590,16803,17395,18003,18829,19283,19285,19713,20357,22370,22419,24047,26903,50706,55985,63873,80982,93695,114332,232983,100039789,100040035,100042493	Angpt1,Aqp1,Bmp2,Ackr3,Edn2,Epha2,Flt4,Fut1,Gli1,Hbegf,Igf1r,Il18,Kit,Lbp,Mmp9,Nedd9,Ccl21a,Ptprz1,Cavin1,Ret,Sema5b,Vtn,Wnt5b,Ccl19,Dysf,Postn,Cxcl13,Trpv4,Cemip,Gpnmb,Lyve1,Cxcl17,Gm12407,Ccl19-ps4,Ccl21b	35/638
5_Member	GO Biological Processes	GO:0030335	positive regulation of cell migration	-8.63093	-5.53204	11600,11826,12156,12778,13615,13836,14257,14343,14632,15200,16001,16173,16590,16803,17395,18003,18829,19283,19713,20357,22370,22419,24047,26903,50706,55985,63873,80982,93695,114332,232983,100039789,100040035,100042493	Angpt1,Aqp1,Bmp2,Ackr3,Edn2,Epha2,Flt4,Fut1,Gli1,Hbegf,Igf1r,Il18,Kit,Lbp,Mmp9,Nedd9,Ccl21a,Ptprz1,Ret,Sema5b,Vtn,Wnt5b,Ccl19,Dysf,Postn,Cxcl13,Trpv4,Cemip,Gpnmb,Lyve1,Cxcl17,Gm12407,Ccl19-ps4,Ccl21b	34/609
5_Member	GO Biological Processes	GO:0002688	regulation of leukocyte chemotaxis	-8.53181	-5.47407	12182,13615,16803,17965,18003,18829,19252,24047,26903,55985,63873,118453,232983,100039789,100040035,100042493	Bst1,Edn2,Lbp,Nbl1,Nedd9,Ccl21a,Dusp1,Ccl19,Dysf,Cxcl13,Trpv4,Mmp28,Cxcl17,Gm12407,Ccl19-ps4,Ccl21b	16/140
5_Member	GO Biological Processes	GO:0006935	chemotaxis	-7.75232	-4.81268	11600,12778,13123,13615,13836,15200,16590,16803,17395,18187,18829,20305,20308,24047,55985,65079,66793,107515,232983,237847,100039789,100040035,100042493	Angpt1,Ackr3,Cyp7b1,Edn2,Epha2,Hbegf,Kit,Lbp,Mmp9,Nrp2,Ccl21a,Ccl6,Ccl9,Ccl19,Cxcl13,Rtn4r,Clxn,Lgr4,Cxcl17,Rtn4rl1,Gm12407,Ccl19-ps4,Ccl21b	23/329
5_Member	GO Biological Processes	GO:0002685	regulation of leukocyte migration	-7.72473	-4.80933	11539,11815,12182,13615,16803,17395,17965,18003,18829,19252,24047,26903,55985,63873,114332,118453,232983,100039789,100040035,100042493	Adora1,Apod,Bst1,Edn2,Lbp,Mmp9,Nbl1,Nedd9,Ccl21a,Dusp1,Ccl19,Dysf,Cxcl13,Trpv4,Lyve1,Mmp28,Cxcl17,Gm12407,Ccl19-ps4,Ccl21b	20/252
5_Member	GO Biological Processes	GO:0042330	taxis	-7.70337	-4.80933	11600,12778,13123,13615,13836,15200,16590,16803,17395,18187,18829,20305,20308,24047,55985,65079,66793,107515,232983,237847,100039789,100040035,100042493	Angpt1,Ackr3,Cyp7b1,Edn2,Epha2,Hbegf,Kit,Lbp,Mmp9,Nrp2,Ccl21a,Ccl6,Ccl9,Ccl19,Cxcl13,Rtn4r,Clxn,Lgr4,Cxcl17,Rtn4rl1,Gm12407,Ccl19-ps4,Ccl21b	23/331
5_Member	GO Biological Processes	GO:0040011	locomotion	-7.69098	-4.80933	11600,12778,13123,13615,13836,15200,16590,16803,17395,18187,18829,20266,20305,20308,24047,55985,65079,66793,107515,232983,237847,100039789,100040035,100042493	Angpt1,Ackr3,Cyp7b1,Edn2,Epha2,Hbegf,Kit,Lbp,Mmp9,Nrp2,Ccl21a,Scn1b,Ccl6,Ccl9,Ccl19,Cxcl13,Rtn4r,Clxn,Lgr4,Cxcl17,Rtn4rl1,Gm12407,Ccl19-ps4,Ccl21b	24/359
5_Member	GO Biological Processes	GO:0060326	cell chemotaxis	-7.15146	-4.36764	12778,13123,13615,13836,15200,16590,16803,17395,18829,20305,20308,24047,55985,66793,232983,100039789,100040035,100042493	Ackr3,Cyp7b1,Edn2,Epha2,Hbegf,Kit,Lbp,Mmp9,Ccl21a,Ccl6,Ccl9,Ccl19,Cxcl13,Clxn,Cxcl17,Gm12407,Ccl19-ps4,Ccl21b	18/222
5_Member	GO Biological Processes	GO:0043410	positive regulation of MAPK cascade	-7.13814	-4.36764	11539,11555,11600,12156,12266,12778,14219,14257,16001,16475,16590,16706,18212,18584,18829,19713,20305,20308,22062,22436,24047,63873,81799,93695,93834,232983,100039789,100040035,100042493	Adora1,Adrb2,Angpt1,Bmp2,C3,Ackr3,Ccn2,Flt4,Igf1r,Ajuba,Kit,Ksr1,Ntrk2,Pde8a,Ccl21a,Ret,Ccl6,Ccl9,Trp73,Xdh,Ccl19,Trpv4,C1qtnf3,Gpnmb,Peli2,Cxcl17,Gm12407,Ccl19-ps4,Ccl21b	29/536
5_Member	GO Biological Processes	GO:0070374	positive regulation of ERK1 and ERK2 cascade	-6.64137	-3.95929	11600,12156,12266,12778,14219,14257,18584,18829,20305,20308,24047,63873,81799,93695,232983,100039789,100040035,100042493	Angpt1,Bmp2,C3,Ackr3,Ccn2,Flt4,Pde8a,Ccl21a,Ccl6,Ccl9,Ccl19,Trpv4,C1qtnf3,Gpnmb,Cxcl17,Gm12407,Ccl19-ps4,Ccl21b	18/240
5_Member	GO Biological Processes	GO:0097529	myeloid leukocyte migration	-6.61323	-3.94244	13615,16590,16803,17395,18829,19152,20305,20308,24047,55985,232983,100039789,100040035,100042493	Edn2,Kit,Lbp,Mmp9,Ccl21a,Prtn3,Ccl6,Ccl9,Ccl19,Cxcl13,Cxcl17,Gm12407,Ccl19-ps4,Ccl21b	14/145
5_Member	GO Biological Processes	GO:0071622	regulation of granulocyte chemotaxis	-6.58625	-3.92716	12182,16803,18829,24047,26903,63873,232983,100039789,100040035,100042493	Bst1,Lbp,Ccl21a,Ccl19,Dysf,Trpv4,Cxcl17,Gm12407,Ccl19-ps4,Ccl21b	10/68
5_Member	GO Biological Processes	GO:0030595	leukocyte chemotaxis	-6.57624	-3.92716	13123,13615,16590,16803,17395,18829,20305,20308,24047,55985,232983,100039789,100040035,100042493	Cyp7b1,Edn2,Kit,Lbp,Mmp9,Ccl21a,Ccl6,Ccl9,Ccl19,Cxcl13,Cxcl17,Gm12407,Ccl19-ps4,Ccl21b	14/146
5_Member	GO Biological Processes	GO:0043408	regulation of MAPK cascade	-6.54773	-3.90912	11539,11555,11600,12156,12266,12778,13836,14219,14257,15901,16001,16475,16590,16600,16706,18212,18584,18829,19252,19713,20305,20308,20319,22062,22436,24047,63873,81799,93695,93834,232983,100039789,100040035,100042493	Adora1,Adrb2,Angpt1,Bmp2,C3,Ackr3,Epha2,Ccn2,Flt4,Id1,Igf1r,Ajuba,Kit,Klf4,Ksr1,Ntrk2,Pde8a,Ccl21a,Dusp1,Ret,Ccl6,Ccl9,Sfrp2,Trp73,Xdh,Ccl19,Trpv4,C1qtnf3,Gpnmb,Peli2,Cxcl17,Gm12407,Ccl19-ps4,Ccl21b	34/742
5_Member	GO Biological Processes	GO:0050920	regulation of chemotaxis	-6.48223	-3.86645	11876,12182,13615,16803,17965,18003,18829,19252,20357,24047,26903,55985,63873,118453,232983,100039789,100040035,100042493	Artn,Bst1,Edn2,Lbp,Nbl1,Nedd9,Ccl21a,Dusp1,Sema5b,Ccl19,Dysf,Cxcl13,Trpv4,Mmp28,Cxcl17,Gm12407,Ccl19-ps4,Ccl21b	18/246
5_Member	GO Biological Processes	GO:0050900	leukocyte migration	-6.4562	-3.86645	11539,11876,13123,13615,16590,16803,17395,18003,18829,19152,20305,20308,24047,55985,232983,100039789,100040035,100042493	Adora1,Artn,Cyp7b1,Edn2,Kit,Lbp,Mmp9,Nedd9,Ccl21a,Prtn3,Ccl6,Ccl9,Ccl19,Cxcl13,Cxcl17,Gm12407,Ccl19-ps4,Ccl21b	18/247
5_Member	GO Biological Processes	GO:0001767	establishment of lymphocyte polarity	-6.39064	-3.84478	18829,24047,232174,100039789,100040035,100042493	Ccl21a,Ccl19,Cyp26b1,Gm12407,Ccl19-ps4,Ccl21b	6/18
5_Member	GO Biological Processes	GO:0001768	establishment of T cell polarity	-6.39064	-3.84478	18829,24047,232174,100039789,100040035,100042493	Ccl21a,Ccl19,Cyp26b1,Gm12407,Ccl19-ps4,Ccl21b	6/18
5_Member	GO Biological Processes	GO:1990868	response to chemokine	-6.17799	-3.64853	12778,17300,18829,19252,20305,20308,24047,55985,232983,100042493	Ackr3,Foxc1,Ccl21a,Dusp1,Ccl6,Ccl9,Ccl19,Cxcl13,Cxcl17,Ccl21b	10/75
5_Member	GO Biological Processes	GO:1990869	cellular response to chemokine	-6.17799	-3.64853	12778,17300,18829,19252,20305,20308,24047,55985,232983,100042493	Ackr3,Foxc1,Ccl21a,Dusp1,Ccl6,Ccl9,Ccl19,Cxcl13,Cxcl17,Ccl21b	10/75
5_Member	GO Biological Processes	GO:0070372	regulation of ERK1 and ERK2 cascade	-6.16978	-3.64829	11600,12156,12266,12778,13836,14219,14257,16600,18584,18829,19252,20305,20308,24047,63873,81799,93695,232983,100039789,100040035,100042493	Angpt1,Bmp2,C3,Ackr3,Epha2,Ccn2,Flt4,Klf4,Pde8a,Ccl21a,Dusp1,Ccl6,Ccl9,Ccl19,Trpv4,C1qtnf3,Gpnmb,Cxcl17,Gm12407,Ccl19-ps4,Ccl21b	21/343
5_Member	GO Biological Processes	GO:0002690	positive regulation of leukocyte chemotaxis	-6.15537	-3.6417	13615,16803,18003,18829,24047,26903,55985,63873,232983,100039789,100040035,100042493	Edn2,Lbp,Nedd9,Ccl21a,Ccl19,Dysf,Cxcl13,Trpv4,Cxcl17,Gm12407,Ccl19-ps4,Ccl21b	12/114
5_Member	GO Biological Processes	GO:0090022	regulation of neutrophil chemotaxis	-6.02961	-3.52363	12182,16803,18829,24047,26903,100039789,100040035,100042493	Bst1,Lbp,Ccl21a,Ccl19,Dysf,Gm12407,Ccl19-ps4,Ccl21b	8/45
5_Member	GO Biological Processes	GO:0070098	chemokine-mediated signaling pathway	-5.75723	-3.31242	12778,17300,18829,20305,20308,24047,55985,232983,100042493	Ackr3,Foxc1,Ccl21a,Ccl6,Ccl9,Ccl19,Cxcl13,Cxcl17,Ccl21b	9/65
5_Member	GO Biological Processes	GO:0071674	mononuclear cell migration	-5.6701	-3.23432	11876,13123,18003,18829,20305,20308,24047,55985,100039789,100040035,100042493	Artn,Cyp7b1,Nedd9,Ccl21a,Ccl6,Ccl9,Ccl19,Cxcl13,Gm12407,Ccl19-ps4,Ccl21b	11/105
5_Member	GO Biological Processes	GO:0090023	positive regulation of neutrophil chemotaxis	-5.53276	-3.12824	16803,18829,24047,26903,100039789,100040035,100042493	Lbp,Ccl21a,Ccl19,Dysf,Gm12407,Ccl19-ps4,Ccl21b	7/37
5_Member	GO Biological Processes	GO:0002687	positive regulation of leukocyte migration	-5.50814	-3.1096	13615,16803,17395,18003,18829,24047,26903,55985,63873,114332,232983,100039789,100040035,100042493	Edn2,Lbp,Mmp9,Nedd9,Ccl21a,Ccl19,Dysf,Cxcl13,Trpv4,Lyve1,Cxcl17,Gm12407,Ccl19-ps4,Ccl21b	14/179
5_Member	GO Biological Processes	GO:0072676	lymphocyte migration	-5.48188	-3.08925	11876,13123,18003,18829,20305,20308,24047,55985,100042493	Artn,Cyp7b1,Nedd9,Ccl21a,Ccl6,Ccl9,Ccl19,Cxcl13,Ccl21b	9/70
5_Member	GO Biological Processes	GO:0071624	positive regulation of granulocyte chemotaxis	-5.2943	-2.93007	16803,18829,24047,26903,100039789,100040035,100042493	Lbp,Ccl21a,Ccl19,Dysf,Gm12407,Ccl19-ps4,Ccl21b	7/40
5_Member	GO Biological Processes	GO:0051896	regulation of phosphatidylinositol 3-kinase/protein kinase B signal transduction	-5.26498	-2.91161	11600,13836,15200,16001,16173,16600,18212,18829,19713,22436,24047,67405,81799,105349,100039789,100040035,100042493	Angpt1,Epha2,Hbegf,Igf1r,Il18,Klf4,Ntrk2,Ccl21a,Ret,Xdh,Ccl19,Nts,C1qtnf3,Akr1c18,Gm12407,Ccl19-ps4,Ccl21b	17/270
5_Member	GO Biological Processes	GO:2000669	negative regulation of dendritic cell apoptotic process	-5.24413	-2.89608	18829,24047,100039789,100040035,100042493	Ccl21a,Ccl19,Gm12407,Ccl19-ps4,Ccl21b	5/16
5_Member	GO Biological Processes	GO:0051897	positive regulation of phosphatidylinositol 3-kinase/protein kinase B signal transduction	-5.15419	-2.82684	11600,15200,16001,16173,18212,18829,19713,24047,67405,81799,105349,100039789,100040035,100042493	Angpt1,Hbegf,Igf1r,Il18,Ntrk2,Ccl21a,Ret,Ccl19,Nts,C1qtnf3,Akr1c18,Gm12407,Ccl19-ps4,Ccl21b	14/192
5_Member	GO Biological Processes	GO:0048247	lymphocyte chemotaxis	-5.14675	-2.82442	13123,18829,20305,20308,24047,55985,100042493	Cyp7b1,Ccl21a,Ccl6,Ccl9,Ccl19,Cxcl13,Ccl21b	7/42
5_Member	GO Biological Processes	GO:0050921	positive regulation of chemotaxis	-5.10572	-2.7981	11876,13615,16803,18003,18829,24047,26903,55985,63873,232983,100039789,100040035,100042493	Artn,Edn2,Lbp,Nedd9,Ccl21a,Ccl19,Dysf,Cxcl13,Trpv4,Cxcl17,Gm12407,Ccl19-ps4,Ccl21b	13/168
5_Member	GO Biological Processes	GO:1902622	regulation of neutrophil migration	-4.94553	-2.6568	12182,16803,18829,24047,26903,100039789,100040035,100042493	Bst1,Lbp,Ccl21a,Ccl19,Dysf,Gm12407,Ccl19-ps4,Ccl21b	8/62
5_Member	GO Biological Processes	GO:0002407	dendritic cell chemotaxis	-4.83753	-2.57999	18829,24047,100039789,100040035,100042493	Ccl21a,Ccl19,Gm12407,Ccl19-ps4,Ccl21b	5/19
5_Member	GO Biological Processes	GO:2000668	regulation of dendritic cell apoptotic process	-4.71879	-2.47813	18829,24047,100039789,100040035,100042493	Ccl21a,Ccl19,Gm12407,Ccl19-ps4,Ccl21b	5/20
5_Member	GO Biological Processes	GO:1902624	positive regulation of neutrophil migration	-4.57231	-2.36736	16803,18829,24047,26903,100039789,100040035,100042493	Lbp,Ccl21a,Ccl19,Dysf,Gm12407,Ccl19-ps4,Ccl21b	7/51
5_Member	GO Biological Processes	GO:1990266	neutrophil migration	-4.53954	-2.33839	13615,16803,18829,19152,20305,20308,24047,55985,100042493	Edn2,Lbp,Ccl21a,Prtn3,Ccl6,Ccl9,Ccl19,Cxcl13,Ccl21b	9/91
5_Member	GO Biological Processes	GO:0034694	response to prostaglandin	-4.4843	-2.29063	18829,24047,105349,100039789,100040035,100042493	Ccl21a,Ccl19,Akr1c18,Gm12407,Ccl19-ps4,Ccl21b	6/36
5_Member	GO Biological Processes	GO:0061844	antimicrobial humoral immune response mediated by antimicrobial peptide	-4.32914	-2.16766	12945,17002,18489,18829,19692,24047,55985,67405,100039789,100040035,100042493	Dmbt1,Ltf,Reg3b,Ccl21a,Reg1,Ccl19,Cxcl13,Nts,Gm12407,Ccl19-ps4,Ccl21b	11/145
5_Member	GO Biological Processes	GO:0030593	neutrophil chemotaxis	-4.29063	-2.14272	13615,16803,18829,20305,20308,24047,55985,100042493	Edn2,Lbp,Ccl21a,Ccl6,Ccl9,Ccl19,Cxcl13,Ccl21b	8/76
5_Member	GO Biological Processes	GO:0097530	granulocyte migration	-4.1463	-2.02746	13615,16803,18829,19152,20305,20308,24047,55985,100042493	Edn2,Lbp,Ccl21a,Prtn3,Ccl6,Ccl9,Ccl19,Cxcl13,Ccl21b	9/102
5_Member	GO Biological Processes	GO:0036336	dendritic cell migration	-4.12832	-2.01568	18829,24047,100039789,100040035,100042493	Ccl21a,Ccl19,Gm12407,Ccl19-ps4,Ccl21b	5/26
5_Member	GO Biological Processes	GO:0032872	regulation of stress-activated MAPK cascade	-4.02445	-1.92396	12156,14219,14257,16001,18829,19252,20319,22436,24047,63873,100039789,100040035,100042493	Bmp2,Ccn2,Flt4,Igf1r,Ccl21a,Dusp1,Sfrp2,Xdh,Ccl19,Trpv4,Gm12407,Ccl19-ps4,Ccl21b	13/213
5_Member	GO Biological Processes	GO:0071621	granulocyte chemotaxis	-4.01577	-1.91826	13615,16803,18829,20305,20308,24047,55985,100042493	Edn2,Lbp,Ccl21a,Ccl6,Ccl9,Ccl19,Cxcl13,Ccl21b	8/83
5_Member	GO Biological Processes	GO:0043087	regulation of GTPase activity	-3.96544	-1.88827	13836,13837,16475,18003,18212,18829,19152,20305,20308,24047,53972,55985,65079,216831,240168,100042493	Epha2,Epha3,Ajuba,Nedd9,Ntrk2,Ccl21a,Prtn3,Ccl6,Ccl9,Ccl19,Ngef,Cxcl13,Rtn4r,Arhgap44,Rasgrp3,Ccl21b	16/309
5_Member	GO Biological Processes	GO:0070302	regulation of stress-activated protein kinase signaling cascade	-3.94326	-1.86892	12156,14219,14257,16001,18829,19252,20319,22436,24047,63873,100039789,100040035,100042493	Bmp2,Ccn2,Flt4,Igf1r,Ccl21a,Dusp1,Sfrp2,Xdh,Ccl19,Trpv4,Gm12407,Ccl19-ps4,Ccl21b	13/217
5_Member	GO Biological Processes	GO:0001906	cell killing	-3.89481	-1.82711	12266,13032,16173,17002,18829,24047,55985,67405,100039789,100040035,100042493	C3,Ctsc,Il18,Ltf,Ccl21a,Ccl19,Cxcl13,Nts,Gm12407,Ccl19-ps4,Ccl21b	11/162
5_Member	GO Biological Processes	GO:0034695	response to prostaglandin E	-3.89031	-1.82711	18829,24047,100039789,100040035,100042493	Ccl21a,Ccl19,Gm12407,Ccl19-ps4,Ccl21b	5/29
5_Member	GO Biological Processes	GO:0051345	positive regulation of hydrolase activity	-3.85178	-1.79675	12156,13033,13836,18003,18829,19152,19713,20305,20308,20319,22436,24047,50768,53972,55985,58801,65079,216831,226695,240168,100042493	Bmp2,Ctsd,Epha2,Nedd9,Ccl21a,Prtn3,Ret,Ccl6,Ccl9,Sfrp2,Xdh,Ccl19,Dlc1,Ngef,Cxcl13,Pmaip1,Rtn4r,Arhgap44,Ifi205,Rasgrp3,Ccl21b	21/489
5_Member	GO Biological Processes	GO:0043547	positive regulation of GTPase activity	-3.78687	-1.75032	13836,18003,18829,19152,20305,20308,24047,53972,55985,65079,216831,240168,100042493	Epha2,Nedd9,Ccl21a,Prtn3,Ccl6,Ccl9,Ccl19,Ngef,Cxcl13,Rtn4r,Arhgap44,Rasgrp3,Ccl21b	13/225
5_Member	GO Biological Processes	GO:0032874	positive regulation of stress-activated MAPK cascade	-3.62143	-1.61964	12156,14219,14257,18829,22436,24047,63873,100039789,100040035,100042493	Bmp2,Ccn2,Flt4,Ccl21a,Xdh,Ccl19,Trpv4,Gm12407,Ccl19-ps4,Ccl21b	10/146
5_Member	GO Biological Processes	GO:0002548	monocyte chemotaxis	-3.6143	-1.61726	18829,20305,20308,24047,100042493	Ccl21a,Ccl6,Ccl9,Ccl19,Ccl21b	5/33
5_Member	KEGG Pathway	mmu04061	Viral protein interaction with cytokine and cytokine receptor - Mus musculus (house mouse)	-3.60511	-1.61276	12778,16173,18829,20305,20308,24047,55985,100042493	Ackr3,Il18,Ccl21a,Ccl6,Ccl9,Ccl19,Cxcl13,Ccl21b	8/95
5_Member	GO Biological Processes	GO:0070304	positive regulation of stress-activated protein kinase signaling cascade	-3.57367	-1.58828	12156,14219,14257,18829,22436,24047,63873,100039789,100040035,100042493	Bmp2,Ccn2,Flt4,Ccl21a,Xdh,Ccl19,Trpv4,Gm12407,Ccl19-ps4,Ccl21b	10/148
5_Member	GO Biological Processes	GO:0031640	killing of cells of another organism	-3.45264	-1.50254	17002,18829,24047,55985,67405,100039789,100040035,100042493	Ltf,Ccl21a,Ccl19,Cxcl13,Nts,Gm12407,Ccl19-ps4,Ccl21b	8/100
5_Member	GO Biological Processes	GO:0141061	disruption of cell in another organism	-3.45264	-1.50254	17002,18829,24047,55985,67405,100039789,100040035,100042493	Ltf,Ccl21a,Ccl19,Cxcl13,Nts,Gm12407,Ccl19-ps4,Ccl21b	8/100
5_Member	GO Biological Processes	GO:0002408	myeloid dendritic cell chemotaxis	-3.39554	-1.45174	24047,100039789,100040035	Ccl19,Gm12407,Ccl19-ps4	3/9
5_Member	GO Biological Processes	GO:0080135	regulation of cellular response to stress	-3.34733	-1.41992	12156,12778,14219,14257,16001,16475,16600,17829,18489,18829,19252,20319,20618,22062,22436,24047,58801,63873,65079,107765,233781,237847,100039789,100040035,100042493	Bmp2,Ackr3,Ccn2,Flt4,Igf1r,Ajuba,Klf4,Muc1,Reg3b,Ccl21a,Dusp1,Sfrp2,Sncg,Trp73,Xdh,Ccl19,Pmaip1,Trpv4,Rtn4r,Ankrd1,Xylt1,Rtn4rl1,Gm12407,Ccl19-ps4,Ccl21b	25/689
5_Member	GO Biological Processes	GO:0097553	calcium ion transmembrane import into cytosol	-3.33743	-1.41403	12286,14219,18829,24047,63873,100039789,100040035,100042493	Cacna1a,Ccn2,Ccl21a,Ccl19,Trpv4,Gm12407,Ccl19-ps4,Ccl21b	8/104
5_Member	GO Biological Processes	GO:0046328	regulation of JNK cascade	-3.32548	-1.40801	14219,14257,16001,18829,20319,24047,63873,100039789,100040035,100042493	Ccn2,Flt4,Igf1r,Ccl21a,Sfrp2,Ccl19,Trpv4,Gm12407,Ccl19-ps4,Ccl21b	10/159
5_Member	GO Biological Processes	GO:0071731	response to nitric oxide	-3.29372	-1.38789	11826,24047,100039789,100040035	Aqp1,Ccl19,Gm12407,Ccl19-ps4	4/22
5_Member	GO Biological Processes	GO:0032103	positive regulation of response to external stimulus	-3.28141	-1.37939	11770,11876,12161,12266,13032,13615,14283,16001,16173,16803,17002,18003,18829,22370,24047,26903,55985,63873,226695,232983,100039789,100040035,100042493	Fabp4,Artn,Bmp6,C3,Ctsc,Edn2,Fosl1,Igf1r,Il18,Lbp,Ltf,Nedd9,Ccl21a,Vtn,Ccl19,Dysf,Cxcl13,Trpv4,Ifi205,Cxcl17,Gm12407,Ccl19-ps4,Ccl21b	23/617
5_Member	GO Biological Processes	GO:0070588	calcium ion transmembrane transport	-3.27772	-1.37759	11419,12286,14219,18829,24047,63873,240660,381290,100039789,100040035,100042493	Asic1,Cacna1a,Ccn2,Ccl21a,Ccl19,Trpv4,Slc35g1,Atp2b4,Gm12407,Ccl19-ps4,Ccl21b	11/191
5_Member	GO Biological Processes	GO:0046330	positive regulation of JNK cascade	-3.17478	-1.28767	14219,14257,18829,24047,63873,100039789,100040035,100042493	Ccn2,Flt4,Ccl21a,Ccl19,Trpv4,Gm12407,Ccl19-ps4,Ccl21b	8/110
5_Member	Reactome Gene Sets	R-MMU-375276	Peptide ligand-binding receptors	-2.8037	-1.01751	12266,12778,13615,18829,20305,20308,24047,55985,67405,100042493	C3,Ackr3,Edn2,Ccl21a,Ccl6,Ccl9,Ccl19,Cxcl13,Nts,Ccl21b	10/186
5_Member	GO Biological Processes	GO:0006816	calcium ion transport	-2.75802	-0.988918	11419,12286,14219,18018,18829,24047,63873,240660,381290,100039789,100040035,100042493	Asic1,Cacna1a,Ccn2,Nfatc1,Ccl21a,Ccl19,Trpv4,Slc35g1,Atp2b4,Gm12407,Ccl19-ps4,Ccl21b	12/255
5_Member	GO Biological Processes	GO:1901654	response to ketone	-2.74658	-0.98027	11826,12990,18829,24047,50706,67606,105349,210044,100039789,100040035,100042493	Aqp1,Csn1s1,Ccl21a,Ccl19,Postn,Fibin,Akr1c18,Adcy2,Gm12407,Ccl19-ps4,Ccl21b	11/222
5_Member	GO Biological Processes	GO:0071347	cellular response to interleukin-1	-2.65743	-0.920618	18829,20305,20308,24047,107765,100042493	Ccl21a,Ccl6,Ccl9,Ccl19,Ankrd1,Ccl21b	6/77
5_Member	GO Biological Processes	GO:0097305	response to alcohol	-2.64668	-0.911159	11529,12990,16001,18829,19206,24047,75577,105349,210044,100039789,100040035,100042493	Adh7,Csn1s1,Igf1r,Ccl21a,Ptch1,Ccl19,Dynap,Akr1c18,Adcy2,Gm12407,Ccl19-ps4,Ccl21b	12/263
5_Member	Reactome Gene Sets	R-MMU-388396	GPCR downstream signalling	-2.64251	-0.908283	11539,11555,12266,12778,13615,14675,15200,18583,18584,18829,19737,20305,20308,24047,53972,55985,56533,67405,238377,100042493	Adora1,Adrb2,C3,Ackr3,Edn2,Gna14,Hbegf,Pde7a,Pde8a,Ccl21a,Rgs5,Ccl6,Ccl9,Ccl19,Ngef,Cxcl13,Rgs17,Nts,Gpr68,Ccl21b	20/567
5_Member	Reactome Gene Sets	R-MMU-380108	Chemokine receptors bind chemokines	-2.61863	-0.890794	12778,18829,24047,55985,100042493	Ackr3,Ccl21a,Ccl19,Cxcl13,Ccl21b	5/54
5_Member	Reactome Gene Sets	R-MMU-373076	Class A/1 (Rhodopsin-like receptors)	-2.53986	-0.833099	11539,11555,12266,12778,13615,18829,20305,20308,24047,55985,67405,238377,100042493	Adora1,Adrb2,C3,Ackr3,Edn2,Ccl21a,Ccl6,Ccl9,Ccl19,Cxcl13,Nts,Gpr68,Ccl21b	13/307
5_Member	GO Biological Processes	GO:0141060	disruption of anatomical structure in another organism	-2.50603	-0.815883	17002,18829,24047,55985,67405,100039789,100040035,100042493	Ltf,Ccl21a,Ccl19,Cxcl13,Nts,Gm12407,Ccl19-ps4,Ccl21b	8/140
5_Member	Reactome Gene Sets	R-MMU-418594	G alpha (i) signalling events	-2.50166	-0.812675	11539,12266,12778,14675,18829,19737,20305,20308,24047,55985,56533,100042493	Adora1,C3,Ackr3,Gna14,Ccl21a,Rgs5,Ccl6,Ccl9,Ccl19,Cxcl13,Rgs17,Ccl21b	12/274
5_Member	GO Biological Processes	GO:0034612	response to tumor necrosis factor	-2.3827	-0.731498	11770,16764,18829,20305,20308,24047,66107,107765,100042493	Fabp4,Aff3,Ccl21a,Ccl6,Ccl9,Ccl19,Wfdc21,Ankrd1,Ccl21b	9/179
5_Member	GO Biological Processes	GO:2000107	negative regulation of leukocyte apoptotic process	-2.36716	-0.720199	16173,18829,24047,100039789,100040035,100042493	Il18,Ccl21a,Ccl19,Gm12407,Ccl19-ps4,Ccl21b	6/88
5_Member	Reactome Gene Sets	R-MMU-372790	Signaling by GPCR	-2.35906	-0.715247	11539,11555,12266,12778,13615,14675,15200,18583,18584,18829,19737,20305,20308,24047,53972,55985,56533,67405,238377,100042493	Adora1,Adrb2,C3,Ackr3,Edn2,Gna14,Hbegf,Pde7a,Pde8a,Ccl21a,Rgs5,Ccl6,Ccl9,Ccl19,Ngef,Cxcl13,Rgs17,Nts,Gpr68,Ccl21b	20/601
5_Member	GO Biological Processes	GO:0030010	establishment of cell polarity	-2.30742	-0.681047	16001,18829,24047,232174,269152,100039789,100040035,100042493	Igf1r,Ccl21a,Ccl19,Cyp26b1,Kif26b,Gm12407,Ccl19-ps4,Ccl21b	8/151
5_Member	GO Biological Processes	GO:0070555	response to interleukin-1	-2.29596	-0.674589	18829,20305,20308,24047,107765,100042493	Ccl21a,Ccl6,Ccl9,Ccl19,Ankrd1,Ccl21b	6/91
5_Member	KEGG Pathway	mmu04060	Cytokine-cytokine receptor interaction - Mus musculus (house mouse)	-2.25969	-0.649115	12156,12161,12778,16173,18383,18829,20305,20308,24047,55985,232983,100042493	Bmp2,Bmp6,Ackr3,Il18,Tnfrsf11b,Ccl21a,Ccl6,Ccl9,Ccl19,Cxcl13,Cxcl17,Ccl21b	12/294
5_Member	GO Biological Processes	GO:0051209	release of sequestered calcium ion into cytosol	-2.15935	-0.57327	18829,24047,100039789,100040035,100042493	Ccl21a,Ccl19,Gm12407,Ccl19-ps4,Ccl21b	5/69
5_Member	GO Biological Processes	GO:0051283	negative regulation of sequestering of calcium ion	-2.13324	-0.558014	18829,24047,100039789,100040035,100042493	Ccl21a,Ccl19,Gm12407,Ccl19-ps4,Ccl21b	5/70
5_Member	GO Biological Processes	GO:0043123	positive regulation of canonical NF-kappaB signal transduction	-2.09724	-0.536085	16475,17002,18829,24047,52829,100039789,100040035,100042493	Ajuba,Ltf,Ccl21a,Ccl19,Lurap1l,Gm12407,Ccl19-ps4,Ccl21b	8/164
5_Member	GO Biological Processes	GO:0043122	regulation of canonical NF-kappaB signal transduction	-2.08641	-0.529564	11600,16475,17002,18829,21929,24047,52829,100039789,100040035,100042493	Angpt1,Ajuba,Ltf,Ccl21a,Tnfaip3,Ccl19,Lurap1l,Gm12407,Ccl19-ps4,Ccl21b	10/235
6_Summary	GO Biological Processes	GO:0048812	neuron projection morphogenesis	-8.75607	-5.53204	11876,12286,12399,12569,12661,13175,13615,13837,16001,17965,18187,18227,19206,19283,20266,20357,21367,22152,23964,50706,57764,59058,65079,80883,107515,110532,237847,243961,259277,269116,329278,399558,73750,12555,13836,14284,15901,20679,72948,233199,14585	Artn,Cacna1a,Runx3,Cdk5r1,Chl1,Dclk1,Edn2,Epha3,Igf1r,Nbl1,Nrp2,Nr4a2,Ptch1,Ptprz1,Scn1b,Sema5b,Cntn2,Tubb3,Tenm2,Postn,Ntn4,Bhlhe22,Rtn4r,Ntng1,Lgr4,Adarb1,Rtn4rl1,Shank1,Klk8,Nfasc,Tnn,Flrt2,Whrn,Cdh15,Epha2,Fosl2,Id1,Sox6,Tppp,Mybpc2,Gfra1	41/-
6_Member	GO Biological Processes	GO:0048812	neuron projection morphogenesis	-8.75607	-5.53204	11876,12286,12399,12569,12661,13175,13615,13837,16001,17965,18187,18227,19206,19283,20266,20357,21367,22152,23964,50706,57764,59058,65079,80883,107515,110532,237847,243961,259277,269116,329278,399558	Artn,Cacna1a,Runx3,Cdk5r1,Chl1,Dclk1,Edn2,Epha3,Igf1r,Nbl1,Nrp2,Nr4a2,Ptch1,Ptprz1,Scn1b,Sema5b,Cntn2,Tubb3,Tenm2,Postn,Ntn4,Bhlhe22,Rtn4r,Ntng1,Lgr4,Adarb1,Rtn4rl1,Shank1,Klk8,Nfasc,Tnn,Flrt2	32/541
6_Member	GO Biological Processes	GO:0007409	axonogenesis	-8.74684	-5.53204	11876,12399,12569,12661,13175,13615,13837,16001,18187,18227,19206,19283,20266,20357,21367,22152,23964,57764,59058,65079,80883,107515,110532,237847,269116,329278,399558	Artn,Runx3,Cdk5r1,Chl1,Dclk1,Edn2,Epha3,Igf1r,Nrp2,Nr4a2,Ptch1,Ptprz1,Scn1b,Sema5b,Cntn2,Tubb3,Tenm2,Ntn4,Bhlhe22,Rtn4r,Ntng1,Lgr4,Adarb1,Rtn4rl1,Nfasc,Tnn,Flrt2	27/397
6_Member	GO Biological Processes	GO:0120039	plasma membrane bounded cell projection morphogenesis	-8.63919	-5.53204	11876,12286,12399,12569,12661,13175,13615,13837,16001,17965,18187,18227,19206,19283,20266,20357,21367,22152,23964,50706,57764,59058,65079,80883,107515,110532,237847,243961,259277,269116,329278,399558	Artn,Cacna1a,Runx3,Cdk5r1,Chl1,Dclk1,Edn2,Epha3,Igf1r,Nbl1,Nrp2,Nr4a2,Ptch1,Ptprz1,Scn1b,Sema5b,Cntn2,Tubb3,Tenm2,Postn,Ntn4,Bhlhe22,Rtn4r,Ntng1,Lgr4,Adarb1,Rtn4rl1,Shank1,Klk8,Nfasc,Tnn,Flrt2	32/547
6_Member	GO Biological Processes	GO:0048858	cell projection morphogenesis	-8.48611	-5.4547	11876,12286,12399,12569,12661,13175,13615,13837,16001,17965,18187,18227,19206,19283,20266,20357,21367,22152,23964,50706,57764,59058,65079,80883,107515,110532,237847,243961,259277,269116,329278,399558	Artn,Cacna1a,Runx3,Cdk5r1,Chl1,Dclk1,Edn2,Epha3,Igf1r,Nbl1,Nrp2,Nr4a2,Ptch1,Ptprz1,Scn1b,Sema5b,Cntn2,Tubb3,Tenm2,Postn,Ntn4,Bhlhe22,Rtn4r,Ntng1,Lgr4,Adarb1,Rtn4rl1,Shank1,Klk8,Nfasc,Tnn,Flrt2	32/555
6_Member	GO Biological Processes	GO:0048667	cell morphogenesis involved in neuron differentiation	-8.38066	-5.38401	11876,12286,12399,12569,12661,13175,13615,13837,16001,18187,18227,19206,19283,20266,20357,21367,22152,23964,57764,59058,65079,73750,80883,107515,110532,237847,243961,269116,329278,399558	Artn,Cacna1a,Runx3,Cdk5r1,Chl1,Dclk1,Edn2,Epha3,Igf1r,Nrp2,Nr4a2,Ptch1,Ptprz1,Scn1b,Sema5b,Cntn2,Tubb3,Tenm2,Ntn4,Bhlhe22,Rtn4r,Whrn,Ntng1,Lgr4,Adarb1,Rtn4rl1,Shank1,Nfasc,Tnn,Flrt2	30/500
6_Member	GO Biological Processes	GO:0000902	cell morphogenesis	-7.98173	-5.0209	11876,12286,12399,12555,12569,12661,13175,13615,13836,13837,14284,15901,16001,17965,18187,18227,19206,19283,20266,20357,20679,21367,22152,23964,50706,57764,59058,65079,73750,80883,107515,110532,237847,243961,259277,269116,329278,399558	Artn,Cacna1a,Runx3,Cdh15,Cdk5r1,Chl1,Dclk1,Edn2,Epha2,Epha3,Fosl2,Id1,Igf1r,Nbl1,Nrp2,Nr4a2,Ptch1,Ptprz1,Scn1b,Sema5b,Sox6,Cntn2,Tubb3,Tenm2,Postn,Ntn4,Bhlhe22,Rtn4r,Whrn,Ntng1,Lgr4,Adarb1,Rtn4rl1,Shank1,Klk8,Nfasc,Tnn,Flrt2	38/779
6_Member	GO Biological Processes	GO:0032989	cellular anatomical entity morphogenesis	-7.66302	-4.7991	11876,12286,12399,12569,12661,13175,13615,13837,16001,17965,18187,18227,19206,19283,20266,20357,21367,22152,23964,50706,57764,59058,65079,72948,80883,107515,110532,233199,237847,243961,259277,269116,329278,399558	Artn,Cacna1a,Runx3,Cdk5r1,Chl1,Dclk1,Edn2,Epha3,Igf1r,Nbl1,Nrp2,Nr4a2,Ptch1,Ptprz1,Scn1b,Sema5b,Cntn2,Tubb3,Tenm2,Postn,Ntn4,Bhlhe22,Rtn4r,Tppp,Ntng1,Lgr4,Adarb1,Mybpc2,Rtn4rl1,Shank1,Klk8,Nfasc,Tnn,Flrt2	34/666
6_Member	GO Biological Processes	GO:0061564	axon development	-7.61302	-4.76614	11876,12399,12569,12661,13175,13615,13837,16001,18187,18227,19206,19283,20266,20357,21367,22152,23964,57764,59058,65079,80883,107515,110532,237847,269116,329278,399558	Artn,Runx3,Cdk5r1,Chl1,Dclk1,Edn2,Epha3,Igf1r,Nrp2,Nr4a2,Ptch1,Ptprz1,Scn1b,Sema5b,Cntn2,Tubb3,Tenm2,Ntn4,Bhlhe22,Rtn4r,Ntng1,Lgr4,Adarb1,Rtn4rl1,Nfasc,Tnn,Flrt2	27/449
6_Member	GO Biological Processes	GO:0007411	axon guidance	-6.48223	-3.86645	11876,12399,12569,12661,13837,18187,19206,20266,20357,21367,22152,23964,57764,65079,107515,237847,269116,399558	Artn,Runx3,Cdk5r1,Chl1,Epha3,Nrp2,Ptch1,Scn1b,Sema5b,Cntn2,Tubb3,Tenm2,Ntn4,Rtn4r,Lgr4,Rtn4rl1,Nfasc,Flrt2	18/246
6_Member	GO Biological Processes	GO:0097485	neuron projection guidance	-6.4562	-3.86645	11876,12399,12569,12661,13837,18187,19206,20266,20357,21367,22152,23964,57764,65079,107515,237847,269116,399558	Artn,Runx3,Cdk5r1,Chl1,Epha3,Nrp2,Ptch1,Scn1b,Sema5b,Cntn2,Tubb3,Tenm2,Ntn4,Rtn4r,Lgr4,Rtn4rl1,Nfasc,Flrt2	18/247
6_Member	GO Biological Processes	GO:0031175	neuron projection development	-6.01617	-3.51774	11876,12286,12399,12569,12661,13175,13615,13837,14585,16001,17965,18187,18227,19206,19283,20266,20357,21367,22152,23964,50706,57764,59058,65079,73750,80883,107515,110532,237847,243961,259277,269116,329278,399558	Artn,Cacna1a,Runx3,Cdk5r1,Chl1,Dclk1,Edn2,Epha3,Gfra1,Igf1r,Nbl1,Nrp2,Nr4a2,Ptch1,Ptprz1,Scn1b,Sema5b,Cntn2,Tubb3,Tenm2,Postn,Ntn4,Bhlhe22,Rtn4r,Whrn,Ntng1,Lgr4,Adarb1,Rtn4rl1,Shank1,Klk8,Nfasc,Tnn,Flrt2	34/783
7_Summary	GO Biological Processes	GO:0042327	positive regulation of phosphorylation	-8.6178	-5.53204	11555,11600,12156,12161,12266,12519,12569,13836,14219,14257,14585,15200,15512,16001,16173,16475,16590,17002,17395,18003,18212,18489,19283,19692,19713,20319,22370,24047,66214,68655,75577,80982,93695,93834,332110,381290,100039789,100040035,11770,16706,19252,21929,52840,110532,232431,16600	Adrb2,Angpt1,Bmp2,Bmp6,C3,Cd80,Cdk5r1,Epha2,Ccn2,Flt4,Gfra1,Hbegf,Hspa2,Igf1r,Il18,Ajuba,Kit,Ltf,Mmp9,Nedd9,Ntrk2,Reg3b,Ptprz1,Reg1,Ret,Sfrp2,Vtn,Ccl19,Rgcc,Fndc1,Dynap,Cemip,Gpnmb,Peli2,Mapk15,Atp2b4,Gm12407,Ccl19-ps4,Fabp4,Ksr1,Dusp1,Tnfaip3,Dbndd2,Adarb1,Gprc5a,Klf4	46/-
7_Member	GO Biological Processes	GO:0042327	positive regulation of phosphorylation	-8.6178	-5.53204	11555,11600,12156,12161,12266,12519,12569,13836,14219,14257,14585,15200,15512,16001,16173,16475,16590,17002,17395,18003,18212,18489,19283,19692,19713,20319,22370,24047,66214,68655,75577,80982,93695,93834,332110,381290,100039789,100040035	Adrb2,Angpt1,Bmp2,Bmp6,C3,Cd80,Cdk5r1,Epha2,Ccn2,Flt4,Gfra1,Hbegf,Hspa2,Igf1r,Il18,Ajuba,Kit,Ltf,Mmp9,Nedd9,Ntrk2,Reg3b,Ptprz1,Reg1,Ret,Sfrp2,Vtn,Ccl19,Rgcc,Fndc1,Dynap,Cemip,Gpnmb,Peli2,Mapk15,Atp2b4,Gm12407,Ccl19-ps4	38/738
7_Member	GO Biological Processes	GO:0001934	positive regulation of protein phosphorylation	-8.36712	-5.38401	11555,11600,12156,12161,12266,12519,12569,14219,14257,14585,15200,15512,16173,16475,16590,17002,17395,18003,18212,18489,19283,19692,19713,20319,22370,24047,66214,68655,75577,80982,93695,93834,332110,381290,100039789,100040035	Adrb2,Angpt1,Bmp2,Bmp6,C3,Cd80,Cdk5r1,Ccn2,Flt4,Gfra1,Hbegf,Hspa2,Il18,Ajuba,Kit,Ltf,Mmp9,Nedd9,Ntrk2,Reg3b,Ptprz1,Reg1,Ret,Sfrp2,Vtn,Ccl19,Rgcc,Fndc1,Dynap,Cemip,Gpnmb,Peli2,Mapk15,Atp2b4,Gm12407,Ccl19-ps4	36/688
7_Member	GO Biological Processes	GO:0043549	regulation of kinase activity	-5.61737	-3.19674	11555,11600,11770,12156,12569,13836,14257,16001,16475,16590,16706,17002,18003,18212,19252,19713,20319,21929,24047,52840,66214,75577,80982,110532,232431,381290,100039789,100040035	Adrb2,Angpt1,Fabp4,Bmp2,Cdk5r1,Epha2,Flt4,Igf1r,Ajuba,Kit,Ksr1,Ltf,Nedd9,Ntrk2,Dusp1,Ret,Sfrp2,Tnfaip3,Ccl19,Dbndd2,Rgcc,Dynap,Cemip,Adarb1,Gprc5a,Atp2b4,Gm12407,Ccl19-ps4	28/601
7_Member	GO Biological Processes	GO:0051338	regulation of transferase activity	-5.15767	-2.82684	11555,11600,11770,12156,12569,13836,14257,16001,16475,16590,16600,16706,17002,18003,18212,19252,19713,20319,21929,24047,52840,66214,75577,80982,110532,232431,332110,381290,100039789,100040035	Adrb2,Angpt1,Fabp4,Bmp2,Cdk5r1,Epha2,Flt4,Igf1r,Ajuba,Kit,Klf4,Ksr1,Ltf,Nedd9,Ntrk2,Dusp1,Ret,Sfrp2,Tnfaip3,Ccl19,Dbndd2,Rgcc,Dynap,Cemip,Adarb1,Gprc5a,Mapk15,Atp2b4,Gm12407,Ccl19-ps4	30/708
7_Member	GO Biological Processes	GO:0033674	positive regulation of kinase activity	-4.73339	-2.48856	11555,11600,12569,13836,14257,16001,16475,16590,17002,18003,18212,19713,24047,66214,75577,80982,381290,100039789,100040035	Adrb2,Angpt1,Cdk5r1,Epha2,Flt4,Igf1r,Ajuba,Kit,Ltf,Nedd9,Ntrk2,Ret,Ccl19,Rgcc,Dynap,Cemip,Atp2b4,Gm12407,Ccl19-ps4	19/359
7_Member	GO Biological Processes	GO:0051347	positive regulation of transferase activity	-4.58848	-2.37195	11555,11600,12569,13836,14257,16001,16475,16590,16600,17002,18003,18212,19713,24047,66214,75577,80982,332110,381290,100039789,100040035	Adrb2,Angpt1,Cdk5r1,Epha2,Flt4,Igf1r,Ajuba,Kit,Klf4,Ltf,Nedd9,Ntrk2,Ret,Ccl19,Rgcc,Dynap,Cemip,Mapk15,Atp2b4,Gm12407,Ccl19-ps4	21/434
7_Member	GO Biological Processes	GO:0045859	regulation of protein kinase activity	-4.1853	-2.06016	11555,11600,11770,12156,12569,16475,16590,16706,17002,18003,19252,20319,21929,24047,52840,66214,75577,80982,110532,232431,381290,100039789,100040035	Adrb2,Angpt1,Fabp4,Bmp2,Cdk5r1,Ajuba,Kit,Ksr1,Ltf,Nedd9,Dusp1,Sfrp2,Tnfaip3,Ccl19,Dbndd2,Rgcc,Dynap,Cemip,Adarb1,Gprc5a,Atp2b4,Gm12407,Ccl19-ps4	23/534
7_Member	GO Biological Processes	GO:0045860	positive regulation of protein kinase activity	-2.92918	-1.10349	11555,11600,12569,16475,16590,17002,18003,24047,66214,75577,80982,381290,100039789,100040035	Adrb2,Angpt1,Cdk5r1,Ajuba,Kit,Ltf,Nedd9,Ccl19,Rgcc,Dynap,Cemip,Atp2b4,Gm12407,Ccl19-ps4	14/312
7_Member	GO Biological Processes	GO:0071900	regulation of protein serine/threonine kinase activity	-2.61354	-0.88698	11555,12156,16475,16590,16706,17002,19252,20319,21929,24047,66214,80982,381290	Adrb2,Bmp2,Ajuba,Kit,Ksr1,Ltf,Dusp1,Sfrp2,Tnfaip3,Ccl19,Rgcc,Cemip,Atp2b4	13/301
7_Member	GO Biological Processes	GO:0071902	positive regulation of protein serine/threonine kinase activity	-2.02262	-0.483775	11555,16475,16590,17002,24047,66214,80982,381290	Adrb2,Ajuba,Kit,Ltf,Ccl19,Rgcc,Cemip,Atp2b4	8/169
8_Summary	GO Biological Processes	GO:0001503	ossification	-7.31069	-4.51123	12156,12161,12393,12394,12399,12824,13836,14219,14284,14632,17002,17300,20256,20289,21922,22410,69121,107515,140494,233781,329278,433938,12571,15901,18018,19206,20319,64075,268935,20679,216616,66042,11555,381651	Bmp2,Bmp6,Runx2,Runx1,Runx3,Col2a1,Epha2,Ccn2,Fosl2,Gli1,Ltf,Foxc1,Clec11a,Scx,Clec3b,Wnt10b,Chrdl2,Lgr4,Atp6v0a4,Xylt1,Tnn,Mn1,Cdk6,Id1,Nfatc1,Ptch1,Sfrp2,Smoc1,Scube3,Sox6,Efemp1,Sostdc1,Adrb2,Odaph	34/-
8_Member	GO Biological Processes	GO:0001503	ossification	-7.31069	-4.51123	12156,12161,12393,12394,12399,12824,13836,14219,14284,14632,17002,17300,20256,20289,21922,22410,69121,107515,140494,233781,329278,433938	Bmp2,Bmp6,Runx2,Runx1,Runx3,Col2a1,Epha2,Ccn2,Fosl2,Gli1,Ltf,Foxc1,Clec11a,Scx,Clec3b,Wnt10b,Chrdl2,Lgr4,Atp6v0a4,Xylt1,Tnn,Mn1	22/320
8_Member	GO Biological Processes	GO:0045667	regulation of osteoblast differentiation	-5.95991	-3.48339	12156,12161,12393,12571,14632,15901,17002,18018,19206,20319,22410,64075,268935,329278	Bmp2,Bmp6,Runx2,Cdk6,Gli1,Id1,Ltf,Nfatc1,Ptch1,Sfrp2,Wnt10b,Smoc1,Scube3,Tnn	14/164
8_Member	GO Biological Processes	GO:0001649	osteoblast differentiation	-3.77346	-1.73949	12156,12161,12393,13836,14284,14632,22410,107515,329278	Bmp2,Bmp6,Runx2,Epha2,Fosl2,Gli1,Wnt10b,Lgr4,Tnn	9/114
8_Member	GO Biological Processes	GO:0061036	positive regulation of cartilage development	-3.67948	-1.67045	12156,12161,12393,20289,20679	Bmp2,Bmp6,Runx2,Scx,Sox6	5/32
8_Member	GO Biological Processes	GO:0061035	regulation of cartilage development	-3.56555	-1.587	12156,12161,12393,14219,20289,20679,216616	Bmp2,Bmp6,Runx2,Ccn2,Scx,Sox6,Efemp1	7/73
8_Member	GO Biological Processes	GO:0045669	positive regulation of osteoblast differentiation	-3.35385	-1.42241	12156,12161,12393,17002,20319,22410,268935	Bmp2,Bmp6,Runx2,Ltf,Sfrp2,Wnt10b,Scube3	7/79
8_Member	GO Biological Processes	GO:0071772	response to BMP	-3.14878	-1.26713	12156,12161,12393,12824,15901,20289,20319,66042	Bmp2,Bmp6,Runx2,Col2a1,Id1,Scx,Sfrp2,Sostdc1	8/111
8_Member	GO Biological Processes	GO:0071773	cellular response to BMP stimulus	-3.14878	-1.26713	12156,12161,12393,12824,15901,20289,20319,66042	Bmp2,Bmp6,Runx2,Col2a1,Id1,Scx,Sfrp2,Sostdc1	8/111
8_Member	GO Biological Processes	GO:0030509	BMP signaling pathway	-2.82242	-1.03056	12156,12161,12393,15901,20289,20319,66042	Bmp2,Bmp6,Runx2,Id1,Scx,Sfrp2,Sostdc1	7/97
8_Member	GO Biological Processes	GO:0032330	regulation of chondrocyte differentiation	-2.58335	-0.864609	12161,12393,14219,20679,216616	Bmp6,Runx2,Ccn2,Sox6,Efemp1	5/55
8_Member	GO Biological Processes	GO:0070169	positive regulation of biomineral tissue development	-2.48203	-0.799953	11555,12156,12161,22410,381651	Adrb2,Bmp2,Bmp6,Wnt10b,Odaph	5/58
8_Member	GO Biological Processes	GO:0045778	positive regulation of ossification	-2.24064	-0.633922	11555,12156,12161,12393,22410	Adrb2,Bmp2,Bmp6,Runx2,Wnt10b	5/66
8_Member	GO Biological Processes	GO:0032332	positive regulation of chondrocyte differentiation	-2.20487	-0.612328	12161,12393,20679	Bmp6,Runx2,Sox6	3/22
8_Member	GO Biological Processes	GO:0030282	bone mineralization	-2.15935	-0.57327	12156,12393,14284,21922,107515	Bmp2,Runx2,Fosl2,Clec3b,Lgr4	5/69
8_Member	GO Biological Processes	GO:0030501	positive regulation of bone mineralization	-2.02218	-0.483775	11555,12156,12161,22410	Adrb2,Bmp2,Bmp6,Wnt10b	4/48
9_Summary	GO Biological Processes	GO:0006959	humoral immune response	-7.03922	-4.28251	12266,12268,12945,17002,17174,18489,18829,19692,20568,24047,55985,66107,66214,67405,192200,192201,209232,100034251,100039789,100040035,100042493,11826,13836,15439,16173,16803	C3,C4b,Dmbt1,Ltf,Masp1,Reg3b,Ccl21a,Reg1,Slpi,Ccl19,Cxcl13,Wfdc21,Rgcc,Nts,Wfdc12,Wfdc15b,Wfdc5,Wfdc17,Gm12407,Ccl19-ps4,Ccl21b,Aqp1,Epha2,Hp,Il18,Lbp	26/-
9_Member	GO Biological Processes	GO:0006959	humoral immune response	-7.03922	-4.28251	12266,12268,12945,17002,17174,18489,18829,19692,20568,24047,55985,66107,66214,67405,192200,192201,209232,100034251,100039789,100040035,100042493	C3,C4b,Dmbt1,Ltf,Masp1,Reg3b,Ccl21a,Reg1,Slpi,Ccl19,Cxcl13,Wfdc21,Rgcc,Nts,Wfdc12,Wfdc15b,Wfdc5,Wfdc17,Gm12407,Ccl19-ps4,Ccl21b	21/304
9_Member	GO Biological Processes	GO:0019730	antimicrobial humoral response	-6.77681	-4.07126	12945,17002,18489,18829,19692,20568,24047,55985,66107,67405,192200,192201,209232,100034251,100039789,100040035,100042493	Dmbt1,Ltf,Reg3b,Ccl21a,Reg1,Slpi,Ccl19,Cxcl13,Wfdc21,Nts,Wfdc12,Wfdc15b,Wfdc5,Wfdc17,Gm12407,Ccl19-ps4,Ccl21b	17/210
9_Member	GO Biological Processes	GO:0019731	antibacterial humoral response	-2.68507	-0.943044	12945,17002,20568,66107,192200,192201,209232,100034251	Dmbt1,Ltf,Slpi,Wfdc21,Wfdc12,Wfdc15b,Wfdc5,Wfdc17	8/131
9_Member	GO Biological Processes	GO:0042742	defense response to bacterium	-2.30021	-0.67684	11826,12945,13836,15439,16173,16803,17002,18489,20568,55985,66107,192200,192201,209232,100034251	Aqp1,Dmbt1,Epha2,Hp,Il18,Lbp,Ltf,Reg3b,Slpi,Cxcl13,Wfdc21,Wfdc12,Wfdc15b,Wfdc5,Wfdc17	15/405
10_Summary	GO Biological Processes	GO:0048729	tissue morphogenesis	-6.92585	-4.18251	11600,11876,12156,12394,12399,12614,13123,13836,14160,15200,16001,16475,16600,16688,17300,18018,18187,19206,19713,20289,20319,22409,50768,53885,66042,107515,107586,107765,110532,269152,271127,317653,11826,12142,12161,12733,14859,18263,99929,100102,240725	Angpt1,Artn,Bmp2,Runx1,Runx3,Celsr1,Cyp7b1,Epha2,Lgr5,Hbegf,Igf1r,Ajuba,Klf4,Krt6b,Foxc1,Nfatc1,Nrp2,Ptch1,Ret,Scx,Sfrp2,Wnt10a,Dlc1,Nphp1,Sostdc1,Lgr4,Ovol2,Ankrd1,Adarb1,Kif26b,Adamts16,Klk14,Aqp1,Prdm1,Bmp6,Clcnka,Gsta3,Odc1,Tiparp,Pcsk9,Sulf1	41/-
10_Member	GO Biological Processes	GO:0048729	tissue morphogenesis	-6.92585	-4.18251	11600,11876,12156,12394,12399,12614,13123,13836,14160,15200,16001,16475,16600,16688,17300,18018,18187,19206,19713,20289,20319,22409,50768,53885,66042,107515,107586,107765,110532,269152,271127,317653	Angpt1,Artn,Bmp2,Runx1,Runx3,Celsr1,Cyp7b1,Epha2,Lgr5,Hbegf,Igf1r,Ajuba,Klf4,Krt6b,Foxc1,Nfatc1,Nrp2,Ptch1,Ret,Scx,Sfrp2,Wnt10a,Dlc1,Nphp1,Sostdc1,Lgr4,Ovol2,Ankrd1,Adarb1,Kif26b,Adamts16,Klk14	32/647
10_Member	GO Biological Processes	GO:0002009	morphogenesis of an epithelium	-5.6135	-3.19674	11600,12156,12394,12399,12614,13123,13836,14160,15200,16001,16475,16600,16688,18018,19206,19713,20319,22409,50768,53885,66042,107515,107586,269152,271127,317653	Angpt1,Bmp2,Runx1,Runx3,Celsr1,Cyp7b1,Epha2,Lgr5,Hbegf,Igf1r,Ajuba,Klf4,Krt6b,Nfatc1,Ptch1,Ret,Sfrp2,Wnt10a,Dlc1,Nphp1,Sostdc1,Lgr4,Ovol2,Kif26b,Adamts16,Klk14	26/533
10_Member	GO Biological Processes	GO:0072001	renal system development	-4.51602	-2.31862	11600,11826,12142,12156,12161,12733,14160,14859,17300,18263,19206,19713,99929,100102,107515,240725,269152,271127	Angpt1,Aqp1,Prdm1,Bmp2,Bmp6,Clcnka,Lgr5,Gsta3,Foxc1,Odc1,Ptch1,Ret,Tiparp,Pcsk9,Lgr4,Sulf1,Kif26b,Adamts16	18/340
10_Member	GO Biological Processes	GO:0001822	kidney development	-4.24862	-2.10734	11600,11826,12142,12156,12161,12733,14859,17300,18263,19206,19713,99929,100102,107515,240725,269152,271127	Angpt1,Aqp1,Prdm1,Bmp2,Bmp6,Clcnka,Gsta3,Foxc1,Odc1,Ptch1,Ret,Tiparp,Pcsk9,Lgr4,Sulf1,Kif26b,Adamts16	17/324
10_Member	GO Biological Processes	GO:0072006	nephron development	-3.07025	-1.21494	11600,11826,12156,17300,19206,107515,240725,269152,271127	Angpt1,Aqp1,Bmp2,Foxc1,Ptch1,Lgr4,Sulf1,Kif26b,Adamts16	9/142
10_Member	GO Biological Processes	GO:0072073	kidney epithelium development	-3.04856	-1.20168	11826,12156,14859,17300,19206,19713,107515,269152,271127	Aqp1,Bmp2,Gsta3,Foxc1,Ptch1,Ret,Lgr4,Kif26b,Adamts16	9/143
10_Member	GO Biological Processes	GO:0001657	ureteric bud development	-2.90192	-1.08566	12156,14859,17300,19206,19713,269152,271127	Bmp2,Gsta3,Foxc1,Ptch1,Ret,Kif26b,Adamts16	7/94
10_Member	GO Biological Processes	GO:0061326	renal tubule development	-2.84856	-1.0506	11826,12156,14160,19206,107515,269152,271127	Aqp1,Bmp2,Lgr5,Ptch1,Lgr4,Kif26b,Adamts16	7/96
10_Member	GO Biological Processes	GO:0072163	mesonephric epithelium development	-2.79661	-1.01332	12156,14859,17300,19206,19713,269152,271127	Bmp2,Gsta3,Foxc1,Ptch1,Ret,Kif26b,Adamts16	7/98
10_Member	GO Biological Processes	GO:0072164	mesonephric tubule development	-2.79661	-1.01332	12156,14859,17300,19206,19713,269152,271127	Bmp2,Gsta3,Foxc1,Ptch1,Ret,Kif26b,Adamts16	7/98
10_Member	GO Biological Processes	GO:0001823	mesonephros development	-2.72118	-0.961751	12156,14859,17300,19206,19713,269152,271127	Bmp2,Gsta3,Foxc1,Ptch1,Ret,Kif26b,Adamts16	7/101
10_Member	GO Biological Processes	GO:0060562	epithelial tube morphogenesis	-2.67629	-0.935573	11600,12156,12614,13836,14160,18018,19206,19713,20319,50768,66042,107515,107586,269152,271127	Angpt1,Bmp2,Celsr1,Epha2,Lgr5,Nfatc1,Ptch1,Ret,Sfrp2,Dlc1,Sostdc1,Lgr4,Ovol2,Kif26b,Adamts16	15/369
10_Member	GO Biological Processes	GO:0072009	nephron epithelium development	-2.57867	-0.864586	11826,12156,17300,19206,107515,269152,271127	Aqp1,Bmp2,Foxc1,Ptch1,Lgr4,Kif26b,Adamts16	7/107
10_Member	GO Biological Processes	GO:0061333	renal tubule morphogenesis	-2.54611	-0.838139	12156,14160,19206,107515,269152,271127	Bmp2,Lgr5,Ptch1,Lgr4,Kif26b,Adamts16	6/81
10_Member	GO Biological Processes	GO:0072080	nephron tubule development	-2.34308	-0.704476	11826,12156,19206,107515,269152,271127	Aqp1,Bmp2,Ptch1,Lgr4,Kif26b,Adamts16	6/89
10_Member	GO Biological Processes	GO:0048754	branching morphogenesis of an epithelial tube	-2.05208	-0.504763	11600,12156,12614,13836,18018,19206,20319,271127	Angpt1,Bmp2,Celsr1,Epha2,Nfatc1,Ptch1,Sfrp2,Adamts16	8/167
10_Member	GO Biological Processes	GO:0072078	nephron tubule morphogenesis	-2.00941	-0.47672	12156,19206,107515,269152,271127	Bmp2,Ptch1,Lgr4,Kif26b,Adamts16	5/75
11_Summary	GO Biological Processes	GO:0050678	regulation of epithelial cell proliferation	-6.88625	-4.1623	12161,12173,12393,12399,12571,13123,14257,14343,14632,15901,16173,18018,19206,19692,20319,21929,22410,22436,26903,56213,57277,66214,107586,223650,240725	Bmp6,Bnc1,Runx2,Runx3,Cdk6,Cyp7b1,Flt4,Fut1,Gli1,Id1,Il18,Nfatc1,Ptch1,Reg1,Sfrp2,Tnfaip3,Wnt10b,Xdh,Dysf,Htra1,Slurp1,Rgcc,Ovol2,Eppk1,Sulf1	25/-
11_Member	GO Biological Processes	GO:0050678	regulation of epithelial cell proliferation	-6.88625	-4.1623	12161,12173,12393,12399,12571,13123,14257,14343,14632,15901,16173,18018,19206,19692,20319,21929,22410,22436,26903,56213,57277,66214,107586,223650,240725	Bmp6,Bnc1,Runx2,Runx3,Cdk6,Cyp7b1,Flt4,Fut1,Gli1,Id1,Il18,Nfatc1,Ptch1,Reg1,Sfrp2,Tnfaip3,Wnt10b,Xdh,Dysf,Htra1,Slurp1,Rgcc,Ovol2,Eppk1,Sulf1	25/426
11_Member	GO Biological Processes	GO:0050679	positive regulation of epithelial cell proliferation	-3.06041	-1.21017	12161,12173,12393,13123,14257,15901,16173,19692,21929,26903,56213,223650	Bmp6,Bnc1,Runx2,Cyp7b1,Flt4,Id1,Il18,Reg1,Tnfaip3,Dysf,Htra1,Eppk1	12/235
12_Summary	GO Biological Processes	GO:0030336	negative regulation of cell migration	-6.75638	-4.06273	11539,11595,11815,16600,17965,18003,18829,19252,20319,50768,55985,57277,66214,110532,118453,223650,240725,329278,332110,381290,100042493,20357,63873,232983	Adora1,Acan,Apod,Klf4,Nbl1,Nedd9,Ccl21a,Dusp1,Sfrp2,Dlc1,Cxcl13,Slurp1,Rgcc,Adarb1,Mmp28,Eppk1,Sulf1,Tnn,Mapk15,Atp2b4,Ccl21b,Sema5b,Trpv4,Cxcl17	24/-
12_Member	GO Biological Processes	GO:0030336	negative regulation of cell migration	-6.75638	-4.06273	11539,11595,11815,16600,17965,18003,18829,19252,20319,50768,55985,57277,66214,110532,118453,223650,240725,329278,332110,381290,100042493	Adora1,Acan,Apod,Klf4,Nbl1,Nedd9,Ccl21a,Dusp1,Sfrp2,Dlc1,Cxcl13,Slurp1,Rgcc,Adarb1,Mmp28,Eppk1,Sulf1,Tnn,Mapk15,Atp2b4,Ccl21b	21/316
12_Member	GO Biological Processes	GO:2000146	negative regulation of cell motility	-6.4658	-3.86645	11539,11595,11815,16600,17965,18003,18829,19252,20319,50768,55985,57277,66214,110532,118453,223650,240725,329278,332110,381290,100042493	Adora1,Acan,Apod,Klf4,Nbl1,Nedd9,Ccl21a,Dusp1,Sfrp2,Dlc1,Cxcl13,Slurp1,Rgcc,Adarb1,Mmp28,Eppk1,Sulf1,Tnn,Mapk15,Atp2b4,Ccl21b	21/329
12_Member	GO Biological Processes	GO:0040013	negative regulation of locomotion	-6.40247	-3.84478	11539,11595,11815,16600,17965,18003,18829,19252,20319,20357,50768,55985,57277,66214,110532,118453,223650,240725,329278,332110,381290,100042493	Adora1,Acan,Apod,Klf4,Nbl1,Nedd9,Ccl21a,Dusp1,Sfrp2,Sema5b,Dlc1,Cxcl13,Slurp1,Rgcc,Adarb1,Mmp28,Eppk1,Sulf1,Tnn,Mapk15,Atp2b4,Ccl21b	22/361
12_Member	GO Biological Processes	GO:0002686	negative regulation of leukocyte migration	-4.68902	-2.45247	11539,11815,17965,18829,19252,118453,100042493	Adora1,Apod,Nbl1,Ccl21a,Dusp1,Mmp28,Ccl21b	7/49
12_Member	GO Biological Processes	GO:0071675	regulation of mononuclear cell migration	-3.29893	-1.38925	11815,17965,18003,18829,19252,55985,63873,232983,100042493	Apod,Nbl1,Nedd9,Ccl21a,Dusp1,Cxcl13,Trpv4,Cxcl17,Ccl21b	9/132
12_Member	GO Biological Processes	GO:0002689	negative regulation of leukocyte chemotaxis	-2.53207	-0.832501	17965,19252,118453	Nbl1,Dusp1,Mmp28	3/17
12_Member	GO Biological Processes	GO:0050922	negative regulation of chemotaxis	-2.48203	-0.799953	17965,19252,20357,55985,118453	Nbl1,Dusp1,Sema5b,Cxcl13,Mmp28	5/58
12_Member	GO Biological Processes	GO:0071676	negative regulation of mononuclear cell migration	-2.38939	-0.73176	11815,17965,19252	Apod,Nbl1,Dusp1	3/19
13_Summary	GO Biological Processes	GO:0007167	enzyme-linked receptor protein signaling pathway	-6.41179	-3.84478	11600,12156,12161,12393,12569,13836,13837,14219,14257,14585,15200,15901,16001,16590,17300,18003,18187,18212,19713,20289,20319,53972,66042,99929,213053,216616,240725,399558,434215,677884,12142,12614,12778,13615,14160,16173,18018,19206,21414,22062,26903,50768,71690,107515,107586,232983,269152,271127,11826,12266,14283	Angpt1,Bmp2,Bmp6,Runx2,Cdk5r1,Epha2,Epha3,Ccn2,Flt4,Gfra1,Hbegf,Id1,Igf1r,Kit,Foxc1,Nedd9,Nrp2,Ntrk2,Ret,Scx,Sfrp2,Ngef,Sostdc1,Tiparp,Slc39a14,Efemp1,Sulf1,Flrt2,Lrrc32,Pakap,Prdm1,Celsr1,Ackr3,Edn2,Lgr5,Il18,Nfatc1,Ptch1,Tcf7,Trp73,Dysf,Dlc1,Esm1,Lgr4,Ovol2,Cxcl17,Kif26b,Adamts16,Aqp1,C3,Fosl1	51/-
13_Member	GO Biological Processes	GO:0007167	enzyme-linked receptor protein signaling pathway	-6.41179	-3.84478	11600,12156,12161,12393,12569,13836,13837,14219,14257,14585,15200,15901,16001,16590,17300,18003,18187,18212,19713,20289,20319,53972,66042,99929,213053,216616,240725,399558,434215,677884	Angpt1,Bmp2,Bmp6,Runx2,Cdk5r1,Epha2,Epha3,Ccn2,Flt4,Gfra1,Hbegf,Id1,Igf1r,Kit,Foxc1,Nedd9,Nrp2,Ntrk2,Ret,Scx,Sfrp2,Ngef,Sostdc1,Tiparp,Slc39a14,Efemp1,Sulf1,Flrt2,Lrrc32,Pakap	30/614
13_Member	GO Biological Processes	GO:0007169	transmembrane receptor protein tyrosine kinase signaling pathway	-5.06905	-2.76624	11600,12569,13836,13837,14219,14257,14585,15200,16001,16590,17300,18003,18187,18212,19713,53972,99929,213053,216616,240725,399558	Angpt1,Cdk5r1,Epha2,Epha3,Ccn2,Flt4,Gfra1,Hbegf,Igf1r,Kit,Foxc1,Nedd9,Nrp2,Ntrk2,Ret,Ngef,Tiparp,Slc39a14,Efemp1,Sulf1,Flrt2	21/403
13_Member	GO Biological Processes	GO:0035239	tube morphogenesis	-4.96163	-2.66356	11600,12142,12156,12614,12778,13615,13836,14160,14219,14257,15200,16173,17300,18018,18187,18212,19206,19713,20319,21414,22062,26903,50768,66042,71690,99929,107515,107586,232983,269152,271127	Angpt1,Prdm1,Bmp2,Celsr1,Ackr3,Edn2,Epha2,Lgr5,Ccn2,Flt4,Hbegf,Il18,Foxc1,Nfatc1,Nrp2,Ntrk2,Ptch1,Ret,Sfrp2,Tcf7,Trp73,Dysf,Dlc1,Sostdc1,Esm1,Tiparp,Lgr4,Ovol2,Cxcl17,Kif26b,Adamts16	31/762
13_Member	GO Biological Processes	GO:0001944	vasculature development	-3.67945	-1.67045	11600,11826,12142,12156,12266,12778,13615,13836,14219,14257,14283,15200,15901,16173,17300,18018,18187,18212,20319,26903,71690,99929,107586,232983	Angpt1,Aqp1,Prdm1,Bmp2,C3,Ackr3,Edn2,Epha2,Ccn2,Flt4,Fosl1,Hbegf,Id1,Il18,Foxc1,Nfatc1,Nrp2,Ntrk2,Sfrp2,Dysf,Esm1,Tiparp,Ovol2,Cxcl17	24/616
13_Member	GO Biological Processes	GO:0001525	angiogenesis	-2.98695	-1.14834	11600,12778,13615,13836,14219,14257,15200,16173,17300,18187,20319,26903,71690,107586,232983	Angpt1,Ackr3,Edn2,Epha2,Ccn2,Flt4,Hbegf,Il18,Foxc1,Nrp2,Sfrp2,Dysf,Esm1,Ovol2,Cxcl17	15/343
13_Member	GO Biological Processes	GO:0048514	blood vessel morphogenesis	-2.90581	-1.08566	11600,12142,12778,13615,13836,14219,14257,15200,16173,17300,18187,18212,20319,26903,71690,99929,107586,232983	Angpt1,Prdm1,Ackr3,Edn2,Epha2,Ccn2,Flt4,Hbegf,Il18,Foxc1,Nrp2,Ntrk2,Sfrp2,Dysf,Esm1,Tiparp,Ovol2,Cxcl17	18/461
13_Member	GO Biological Processes	GO:0001568	blood vessel development	-2.54749	-0.838303	11600,11826,12142,12778,13615,13836,14219,14257,14283,15200,16173,17300,18187,18212,20319,26903,71690,99929,107586,232983	Angpt1,Aqp1,Prdm1,Ackr3,Edn2,Epha2,Ccn2,Flt4,Fosl1,Hbegf,Il18,Foxc1,Nrp2,Ntrk2,Sfrp2,Dysf,Esm1,Tiparp,Ovol2,Cxcl17	20/578
14_Summary	GO Biological Processes	GO:0120035	regulation of plasma membrane bounded cell projection organization	-6.00375	-3.51275	11826,12286,12569,12904,13836,13837,15901,16001,16590,16600,18003,18212,18829,19283,19713,20266,20319,20357,24047,53972,63873,65079,80883,107765,216616,216831,233781,237847,271127,320712,329278,332110,668303,100042493	Aqp1,Cacna1a,Cdk5r1,Crabp2,Epha2,Epha3,Id1,Igf1r,Kit,Klf4,Nedd9,Ntrk2,Ccl21a,Ptprz1,Ret,Scn1b,Sfrp2,Sema5b,Ccl19,Ngef,Trpv4,Rtn4r,Ntng1,Ankrd1,Efemp1,Arhgap44,Xylt1,Rtn4rl1,Adamts16,Abi3bp,Tnn,Mapk15,Kif26a,Ccl21b	34/-
14_Member	GO Biological Processes	GO:0120035	regulation of plasma membrane bounded cell projection organization	-6.00375	-3.51275	11826,12286,12569,12904,13836,13837,15901,16001,16590,16600,18003,18212,18829,19283,19713,20266,20319,20357,24047,53972,63873,65079,80883,107765,216616,216831,233781,237847,271127,320712,329278,332110,668303,100042493	Aqp1,Cacna1a,Cdk5r1,Crabp2,Epha2,Epha3,Id1,Igf1r,Kit,Klf4,Nedd9,Ntrk2,Ccl21a,Ptprz1,Ret,Scn1b,Sfrp2,Sema5b,Ccl19,Ngef,Trpv4,Rtn4r,Ntng1,Ankrd1,Efemp1,Arhgap44,Xylt1,Rtn4rl1,Adamts16,Abi3bp,Tnn,Mapk15,Kif26a,Ccl21b	34/784
14_Member	GO Biological Processes	GO:0031344	regulation of cell projection organization	-5.82051	-3.36484	11826,12286,12569,12904,13836,13837,15901,16001,16590,16600,18003,18212,18829,19283,19713,20266,20319,20357,24047,53972,63873,65079,80883,107765,216616,216831,233781,237847,271127,320712,329278,332110,668303,100042493	Aqp1,Cacna1a,Cdk5r1,Crabp2,Epha2,Epha3,Id1,Igf1r,Kit,Klf4,Nedd9,Ntrk2,Ccl21a,Ptprz1,Ret,Scn1b,Sfrp2,Sema5b,Ccl19,Ngef,Trpv4,Rtn4r,Ntng1,Ankrd1,Efemp1,Arhgap44,Xylt1,Rtn4rl1,Adamts16,Abi3bp,Tnn,Mapk15,Kif26a,Ccl21b	34/799
14_Member	GO Biological Processes	GO:0010975	regulation of neuron projection development	-4.43409	-2.24778	12286,12569,12904,13837,15901,16001,16600,18212,19283,19713,20266,20319,20357,53972,63873,65079,80883,107765,216616,216831,233781,237847,320712,329278,668303	Cacna1a,Cdk5r1,Crabp2,Epha3,Id1,Igf1r,Klf4,Ntrk2,Ptprz1,Ret,Scn1b,Sfrp2,Sema5b,Ngef,Trpv4,Rtn4r,Ntng1,Ankrd1,Efemp1,Arhgap44,Xylt1,Rtn4rl1,Abi3bp,Tnn,Kif26a	25/586
14_Member	GO Biological Processes	GO:0031345	negative regulation of cell projection organization	-3.26032	-1.36395	13837,15901,18829,19283,20357,53972,63873,65079,216616,216831,233781,237847	Epha3,Id1,Ccl21a,Ptprz1,Sema5b,Ngef,Trpv4,Rtn4r,Efemp1,Arhgap44,Xylt1,Rtn4rl1	12/223
14_Member	GO Biological Processes	GO:0010977	negative regulation of neuron projection development	-2.5824	-0.864609	13837,19283,20357,53972,63873,65079,216616,233781,237847	Epha3,Ptprz1,Sema5b,Ngef,Trpv4,Rtn4r,Efemp1,Xylt1,Rtn4rl1	9/167
14_Member	GO Biological Processes	GO:0031346	positive regulation of cell projection organization	-2.1032	-0.536085	11826,12904,13837,16001,16590,18003,18212,18829,19283,19713,20266,24047,107765,216616,329278,100042493	Aqp1,Crabp2,Epha3,Igf1r,Kit,Nedd9,Ntrk2,Ccl21a,Ptprz1,Ret,Scn1b,Ccl19,Ankrd1,Efemp1,Tnn,Ccl21b	16/467
15_Summary	WikiPathways	WP1270	Endochondral ossification	-5.99634	-3.51264	11595,12393,12399,12824,16001,17395,19206,20679,21859,12023,14219,17183,22370,329278	Acan,Runx2,Runx3,Col2a1,Igf1r,Mmp9,Ptch1,Sox6,Timp3,Barx2,Ccn2,Matn4,Vtn,Tnn	14/-
15_Member	WikiPathways	WP1270	Endochondral ossification	-5.99634	-3.51264	11595,12393,12399,12824,16001,17395,19206,20679,21859	Acan,Runx2,Runx3,Col2a1,Igf1r,Mmp9,Ptch1,Sox6,Timp3	9/61
15_Member	GO Biological Processes	GO:0001502	cartilage condensation	-4.6069	-2.38643	11595,12023,12824,14219,20679	Acan,Barx2,Col2a1,Ccn2,Sox6	5/21
15_Member	GO Biological Processes	GO:0098743	cell aggregation	-4.40086	-2.22537	11595,12023,12824,14219,20679	Acan,Barx2,Col2a1,Ccn2,Sox6	5/23
15_Member	Reactome Gene Sets	R-MMU-3000178	ECM proteoglycans	-3.11533	-1.24086	11595,12824,17183,22370,329278	Acan,Col2a1,Matn4,Vtn,Tnn	5/42
16_Summary	GO Biological Processes	GO:0070848	response to growth factor	-5.87595	-3.40648	12156,12161,12393,12394,12399,12824,13836,14219,14257,15901,16001,16600,17300,18187,18212,18584,20289,20319,20679,55985,66042,105349,107765,399558,434215	Bmp2,Bmp6,Runx2,Runx1,Runx3,Col2a1,Epha2,Ccn2,Flt4,Id1,Igf1r,Klf4,Foxc1,Nrp2,Ntrk2,Pde8a,Scx,Sfrp2,Sox6,Cxcl13,Sostdc1,Akr1c18,Ankrd1,Flrt2,Lrrc32	25/-
16_Member	GO Biological Processes	GO:0070848	response to growth factor	-5.87595	-3.40648	12156,12161,12393,12394,12399,12824,13836,14219,14257,15901,16001,16600,17300,18187,18212,18584,20289,20319,20679,55985,66042,105349,107765,399558,434215	Bmp2,Bmp6,Runx2,Runx1,Runx3,Col2a1,Epha2,Ccn2,Flt4,Id1,Igf1r,Klf4,Foxc1,Nrp2,Ntrk2,Pde8a,Scx,Sfrp2,Sox6,Cxcl13,Sostdc1,Akr1c18,Ankrd1,Flrt2,Lrrc32	25/483
16_Member	GO Biological Processes	GO:0071363	cellular response to growth factor stimulus	-5.11127	-2.7988	12156,12161,12393,12394,12824,14219,14257,15901,16001,16600,17300,18187,18212,18584,20289,20319,20679,55985,66042,105349,107765,399558,434215	Bmp2,Bmp6,Runx2,Runx1,Col2a1,Ccn2,Flt4,Id1,Igf1r,Klf4,Foxc1,Nrp2,Ntrk2,Pde8a,Scx,Sfrp2,Sox6,Cxcl13,Sostdc1,Akr1c18,Ankrd1,Flrt2,Lrrc32	23/466
16_Member	GO Biological Processes	GO:0071559	response to transforming growth factor beta	-3.00578	-1.16388	12156,12394,12399,16001,20289,20679,105349,107765,434215	Bmp2,Runx1,Runx3,Igf1r,Scx,Sox6,Akr1c18,Ankrd1,Lrrc32	9/145
16_Member	GO Biological Processes	GO:0071560	cellular response to transforming growth factor beta stimulus	-2.52515	-0.827955	12156,12394,16001,20289,20679,105349,107765,434215	Bmp2,Runx1,Igf1r,Scx,Sox6,Akr1c18,Ankrd1,Lrrc32	8/139
17_Summary	GO Biological Processes	GO:0098662	inorganic cation transmembrane transport	-5.85646	-3.39395	11419,11826,12286,14219,16535,16538,18829,20266,20272,20273,24047,52150,57442,59033,63873,71145,108017,140494,213053,226999,240660,330953,381290,100039789,100040035,100042493,17002,18018,20500,12733,14805,69454,11539,12161,13615,23959,68027,76459,16001,22228,81799	Asic1,Aqp1,Cacna1a,Ccn2,Kcnq1,Kcns1,Ccl21a,Scn1b,Scn7a,Scn8a,Ccl19,Kcnk6,Kcne3,Slc4a8,Trpv4,Scara5,Fxyd4,Atp6v0a4,Slc39a14,Slc9a2,Slc35g1,Hcn4,Atp2b4,Gm12407,Ccl19-ps4,Ccl21b,Ltf,Nfatc1,Slc13a2,Clcnka,Grik1,Clic3,Adora1,Bmp6,Edn2,Nt5e,Tmem178,Car12,Igf1r,Ucp2,C1qtnf3	41/-
17_Member	GO Biological Processes	GO:0098662	inorganic cation transmembrane transport	-5.85646	-3.39395	11419,11826,12286,14219,16535,16538,18829,20266,20272,20273,24047,52150,57442,59033,63873,71145,108017,140494,213053,226999,240660,330953,381290,100039789,100040035,100042493	Asic1,Aqp1,Cacna1a,Ccn2,Kcnq1,Kcns1,Ccl21a,Scn1b,Scn7a,Scn8a,Ccl19,Kcnk6,Kcne3,Slc4a8,Trpv4,Scara5,Fxyd4,Atp6v0a4,Slc39a14,Slc9a2,Slc35g1,Hcn4,Atp2b4,Gm12407,Ccl19-ps4,Ccl21b	26/517
17_Member	GO Biological Processes	GO:0098655	monoatomic cation transmembrane transport	-5.3667	-2.99693	11419,12286,14219,16535,16538,18829,20266,20272,20273,24047,52150,57442,59033,63873,71145,108017,140494,213053,226999,240660,330953,381290,100039789,100040035,100042493	Asic1,Cacna1a,Ccn2,Kcnq1,Kcns1,Ccl21a,Scn1b,Scn7a,Scn8a,Ccl19,Kcnk6,Kcne3,Slc4a8,Trpv4,Scara5,Fxyd4,Atp6v0a4,Slc39a14,Slc9a2,Slc35g1,Hcn4,Atp2b4,Gm12407,Ccl19-ps4,Ccl21b	25/516
17_Member	GO Biological Processes	GO:0030001	metal ion transport	-5.20444	-2.86686	11419,11826,12286,14219,16535,16538,17002,18018,18829,20266,20272,20273,20500,24047,52150,57442,59033,63873,71145,108017,213053,226999,240660,330953,381290,100039789,100040035,100042493	Asic1,Aqp1,Cacna1a,Ccn2,Kcnq1,Kcns1,Ltf,Nfatc1,Ccl21a,Scn1b,Scn7a,Scn8a,Slc13a2,Ccl19,Kcnk6,Kcne3,Slc4a8,Trpv4,Scara5,Fxyd4,Slc39a14,Slc9a2,Slc35g1,Hcn4,Atp2b4,Gm12407,Ccl19-ps4,Ccl21b	28/632
17_Member	GO Biological Processes	GO:0098660	inorganic ion transmembrane transport	-4.94625	-2.6568	11419,11826,12286,14219,16535,16538,18829,20266,20272,20273,24047,52150,57442,59033,63873,71145,108017,140494,213053,226999,240660,330953,381290,100039789,100040035,100042493	Asic1,Aqp1,Cacna1a,Ccn2,Kcnq1,Kcns1,Ccl21a,Scn1b,Scn7a,Scn8a,Ccl19,Kcnk6,Kcne3,Slc4a8,Trpv4,Scara5,Fxyd4,Atp6v0a4,Slc39a14,Slc9a2,Slc35g1,Hcn4,Atp2b4,Gm12407,Ccl19-ps4,Ccl21b	26/581
17_Member	GO Biological Processes	GO:0034220	monoatomic ion transmembrane transport	-4.89389	-2.61881	11419,12286,12733,14219,14805,16535,16538,18829,20266,20272,20273,24047,52150,57442,59033,63873,69454,71145,108017,140494,213053,226999,240660,330953,381290,100039789,100040035,100042493	Asic1,Cacna1a,Clcnka,Ccn2,Grik1,Kcnq1,Kcns1,Ccl21a,Scn1b,Scn7a,Scn8a,Ccl19,Kcnk6,Kcne3,Slc4a8,Trpv4,Clic3,Scara5,Fxyd4,Atp6v0a4,Slc39a14,Slc9a2,Slc35g1,Hcn4,Atp2b4,Gm12407,Ccl19-ps4,Ccl21b	28/657
17_Member	GO Biological Processes	GO:0006812	monoatomic cation transport	-4.66157	-2.43003	11419,11826,12286,14219,16535,16538,17002,18018,18829,20266,20272,20273,20500,24047,52150,57442,59033,63873,71145,108017,140494,213053,226999,240660,330953,381290,100039789,100040035,100042493	Asic1,Aqp1,Cacna1a,Ccn2,Kcnq1,Kcns1,Ltf,Nfatc1,Ccl21a,Scn1b,Scn7a,Scn8a,Slc13a2,Ccl19,Kcnk6,Kcne3,Slc4a8,Trpv4,Scara5,Fxyd4,Atp6v0a4,Slc39a14,Slc9a2,Slc35g1,Hcn4,Atp2b4,Gm12407,Ccl19-ps4,Ccl21b	29/714
17_Member	GO Biological Processes	GO:0050801	monoatomic ion homeostasis	-2.22228	-0.623176	11539,12161,12286,13615,16535,20272,23959,57442,59033,63873,68027,71145,76459,140494,213053,226999,240660,381290	Adora1,Bmp6,Cacna1a,Edn2,Kcnq1,Scn7a,Nt5e,Kcne3,Slc4a8,Trpv4,Tmem178,Scara5,Car12,Atp6v0a4,Slc39a14,Slc9a2,Slc35g1,Atp2b4	18/535
17_Member	GO Biological Processes	GO:0055082	intracellular chemical homeostasis	-2.16589	-0.577976	11539,11826,12161,12286,13615,16001,16535,22228,57442,59033,63873,68027,71145,81799,140494,213053,226999,240660,381290	Adora1,Aqp1,Bmp6,Cacna1a,Edn2,Igf1r,Kcnq1,Ucp2,Kcne3,Slc4a8,Trpv4,Tmem178,Scara5,C1qtnf3,Atp6v0a4,Slc39a14,Slc9a2,Slc35g1,Atp2b4	19/584
18_Summary	GO Biological Processes	GO:0021700	developmental maturation	-5.75473	-3.31242	12023,12266,12286,12393,12399,12569,18227,18829,19713,21367,22410,24047,57764,67844,76505,140494,233781,243961,269116,382018	Barx2,C3,Cacna1a,Runx2,Runx3,Cdk5r1,Nr4a2,Ccl21a,Ret,Cntn2,Wnt10b,Ccl19,Ntn4,Rab32,Smim45,Atp6v0a4,Xylt1,Shank1,Nfasc,Unc13a	20/-
18_Member	GO Biological Processes	GO:0021700	developmental maturation	-5.75473	-3.31242	12023,12266,12286,12393,12399,12569,18227,18829,19713,21367,22410,24047,57764,67844,76505,140494,233781,243961,269116,382018	Barx2,C3,Cacna1a,Runx2,Runx3,Cdk5r1,Nr4a2,Ccl21a,Ret,Cntn2,Wnt10b,Ccl19,Ntn4,Rab32,Smim45,Atp6v0a4,Xylt1,Shank1,Nfasc,Unc13a	20/334
18_Member	GO Biological Processes	GO:0042551	neuron maturation	-4.57231	-2.36736	12266,18227,19713,21367,57764,76505,269116	C3,Nr4a2,Ret,Cntn2,Ntn4,Smim45,Nfasc	7/51
18_Member	GO Biological Processes	GO:0071695	anatomical structure maturation	-4.45287	-2.2629	12023,12266,12286,12393,12399,12569,18227,18829,19713,21367,22410,24047,57764,76505,233781,269116	Barx2,C3,Cacna1a,Runx2,Runx3,Cdk5r1,Nr4a2,Ccl21a,Ret,Cntn2,Wnt10b,Ccl19,Ntn4,Smim45,Xylt1,Nfasc	16/281
18_Member	GO Biological Processes	GO:0048469	cell maturation	-2.93897	-1.11169	12266,12393,12399,18227,18829,19713,21367,24047,57764,76505,269116	C3,Runx2,Runx3,Nr4a2,Ccl21a,Ret,Cntn2,Ccl19,Ntn4,Smim45,Nfasc	11/210
19_Summary	GO Biological Processes	GO:0010035	response to inorganic substance	-5.64327	-3.21392	11539,11744,11770,11826,12161,12393,17395,18018,18104,18227,19206,20500,20657,21929,22228,22436,23959,24047,55925,67606,74020,105349,109697,381290,100039789,100040035,12569,16001,17067	Adora1,Anxa11,Fabp4,Aqp1,Bmp6,Runx2,Mmp9,Nfatc1,Nqo1,Nr4a2,Ptch1,Slc13a2,Sod3,Tnfaip3,Ucp2,Xdh,Nt5e,Ccl19,Syt8,Fibin,Cpne4,Akr1c18,Cpa1,Atp2b4,Gm12407,Ccl19-ps4,Cdk5r1,Igf1r,Ly6c1	29/-
19_Member	GO Biological Processes	GO:0010035	response to inorganic substance	-5.64327	-3.21392	11539,11744,11770,11826,12161,12393,17395,18018,18104,18227,19206,20500,20657,21929,22228,22436,23959,24047,55925,67606,74020,105349,109697,381290,100039789,100040035	Adora1,Anxa11,Fabp4,Aqp1,Bmp6,Runx2,Mmp9,Nfatc1,Nqo1,Nr4a2,Ptch1,Slc13a2,Sod3,Tnfaip3,Ucp2,Xdh,Nt5e,Ccl19,Syt8,Fibin,Cpne4,Akr1c18,Cpa1,Atp2b4,Gm12407,Ccl19-ps4	26/531
19_Member	GO Biological Processes	GO:0010038	response to metal ion	-2.88988	-1.08135	11744,11770,11826,12161,17395,18018,20500,20657,22436,55925,67606,74020,105349,109697	Anxa11,Fabp4,Aqp1,Bmp6,Mmp9,Nfatc1,Slc13a2,Sod3,Xdh,Syt8,Fibin,Cpne4,Akr1c18,Cpa1	14/315
19_Member	GO Biological Processes	GO:1902074	response to salt	-2.43806	-0.768381	11744,11770,12393,12569,16001,17067,18018,19206,20500,23959,55925,74020,105349,381290	Anxa11,Fabp4,Runx2,Cdk5r1,Igf1r,Ly6c1,Nfatc1,Ptch1,Slc13a2,Nt5e,Syt8,Cpne4,Akr1c18,Atp2b4	14/353
19_Member	GO Biological Processes	GO:0071248	cellular response to metal ion	-2.28984	-0.670447	11770,11826,12161,17395,18018,20500,55925,74020,105349	Fabp4,Aqp1,Bmp6,Mmp9,Nfatc1,Slc13a2,Syt8,Cpne4,Akr1c18	9/185
20_Summary	GO Biological Processes	GO:0007162	negative regulation of cell adhesion	-5.59784	-3.18724	11600,11815,12156,12161,12394,12399,12519,16600,17829,18829,19252,19283,21929,50706,50768,63873,66214,93695,434215,100042493,11539,12571,17174,17965,18383,21807,67664,68027,107515,118453,226695,238377,16173,22361,22410,24047,55985,233067,269152	Angpt1,Apod,Bmp2,Bmp6,Runx1,Runx3,Cd80,Klf4,Muc1,Ccl21a,Dusp1,Ptprz1,Tnfaip3,Postn,Dlc1,Trpv4,Rgcc,Gpnmb,Lrrc32,Ccl21b,Adora1,Cdk6,Masp1,Nbl1,Tnfrsf11b,Tsc22d1,Rnf125,Tmem178,Lgr4,Mmp28,Ifi205,Gpr68,Il18,Vnn1,Wnt10b,Ccl19,Cxcl13,Lrfn3,Kif26b	39/-
20_Member	GO Biological Processes	GO:0007162	negative regulation of cell adhesion	-5.59784	-3.18724	11600,11815,12156,12161,12394,12399,12519,16600,17829,18829,19252,19283,21929,50706,50768,63873,66214,93695,434215,100042493	Angpt1,Apod,Bmp2,Bmp6,Runx1,Runx3,Cd80,Klf4,Muc1,Ccl21a,Dusp1,Ptprz1,Tnfaip3,Postn,Dlc1,Trpv4,Rgcc,Gpnmb,Lrrc32,Ccl21b	20/342
20_Member	GO Biological Processes	GO:0002683	negative regulation of immune system process	-3.69013	-1.67379	11539,11600,11815,12394,12399,12519,12571,17174,17965,18383,18829,19252,21807,21929,67664,68027,93695,107515,118453,226695,238377,434215,100042493	Adora1,Angpt1,Apod,Runx1,Runx3,Cd80,Cdk6,Masp1,Nbl1,Tnfrsf11b,Ccl21a,Dusp1,Tsc22d1,Tnfaip3,Rnf125,Tmem178,Gpnmb,Lgr4,Mmp28,Ifi205,Gpr68,Lrrc32,Ccl21b	23/577
20_Member	GO Biological Processes	GO:0022408	negative regulation of cell-cell adhesion	-3.58399	-1.59398	12156,12161,12394,12399,12519,16600,18829,21929,63873,66214,93695,434215,100042493	Bmp2,Bmp6,Runx1,Runx3,Cd80,Klf4,Ccl21a,Tnfaip3,Trpv4,Rgcc,Gpnmb,Lrrc32,Ccl21b	13/236
20_Member	GO Biological Processes	GO:0022407	regulation of cell-cell adhesion	-3.05747	-1.20891	12156,12161,12394,12399,12519,16173,16600,18829,21929,22361,22410,24047,55985,63873,66214,93695,233067,269152,434215,100042493	Bmp2,Bmp6,Runx1,Runx3,Cd80,Il18,Klf4,Ccl21a,Tnfaip3,Vnn1,Wnt10b,Ccl19,Cxcl13,Trpv4,Rgcc,Gpnmb,Lrfn3,Kif26b,Lrrc32,Ccl21b	20/523

## Sheet: Depleted (sgFbxw7 vs sgSHL)
GroupID	Category	Term	Description	LogP	Log(q-value)	Genes	Symbols	InTerm_InList
1_Summary	GO Biological Processes	GO:0007610	behavior	-7.35751	-3.09565	11554,11609,11980,12287,12805,14009,16497,16531,17450,18143,18667,19088,19242,19699,20418,20528,53324,67092,71960,83429,98660,104156,195208,217212,218476,224129,228139,231602,241226,320127,330222	Adrb1,Agtr2,Atp8a1,Cacna1b,Cntn1,Etv1,Kcnab1,Kcnma1,Morc1,Npas2,Pgr,Prkar2b,Ptn,Reln,Shc3,Slc2a4,Nptx2,Gatm,Myh14,Ctns,Atp1a2,Etv5,Dcdc2a,Pyy,Gcnt4,Adcy5,P2rx3,P2rx2,Itga8,Dgki,Sdk1	31/-
1_Member	GO Biological Processes	GO:0007610	behavior	-7.35751	-3.09565	11554,11609,11980,12287,12805,14009,16497,16531,17450,18143,18667,19088,19242,19699,20418,20528,53324,67092,71960,83429,98660,104156,195208,217212,218476,224129,228139,231602,241226,320127,330222	Adrb1,Agtr2,Atp8a1,Cacna1b,Cntn1,Etv1,Kcnab1,Kcnma1,Morc1,Npas2,Pgr,Prkar2b,Ptn,Reln,Shc3,Slc2a4,Nptx2,Gatm,Myh14,Ctns,Atp1a2,Etv5,Dcdc2a,Pyy,Gcnt4,Adcy5,P2rx3,P2rx2,Itga8,Dgki,Sdk1	31/762
1_Member	GO Biological Processes	GO:0007611	learning or memory	-4.3319	-1.41246	11554,11980,16497,19088,19242,19699,20418,20528,53324,67092,83429,98660,195208,241226,320127	Adrb1,Atp8a1,Kcnab1,Prkar2b,Ptn,Reln,Shc3,Slc2a4,Nptx2,Gatm,Ctns,Atp1a2,Dcdc2a,Itga8,Dgki	15/332
1_Member	GO Biological Processes	GO:0050890	cognition	-3.77022	-1.09943	11554,11980,16497,19088,19242,19699,20418,20528,53324,67092,83429,98660,195208,241226,320127	Adrb1,Atp8a1,Kcnab1,Prkar2b,Ptn,Reln,Shc3,Slc2a4,Nptx2,Gatm,Ctns,Atp1a2,Dcdc2a,Itga8,Dgki	15/373
1_Member	GO Biological Processes	GO:0007612	learning	-2.92493	-0.675908	11980,19088,19242,19699,53324,83429,98660,195208,320127	Atp8a1,Prkar2b,Ptn,Reln,Nptx2,Ctns,Atp1a2,Dcdc2a,Dgki	9/192
2_Summary	GO Biological Processes	GO:0061180	mammary gland epithelium development	-6.45725	-2.49642	11839,17701,17702,18612,18667,19116,20496,20850,21386,21385,15375,20346,21817,12817,13392,14164,12583,14174,14461,14462,19123,83429,14275,56079,218476,17755,20361,11609,12167,19094,19242,26380,11601,12705,20204,21419	Areg,Msx1,Msx2,Etv4,Pgr,Prlr,Slc12a2,Stat5a,Tbx3,Tbx2,Foxa1,Sema3a,Tgm2,Col13a1,Dlx2,Fgf1,Cdo1,Fgf3,Gata2,Gata3,Proc,Ctns,Folr1,Astn2,Gcnt4,Map1b,Sema7a,Agtr2,Bmpr1b,Mapk11,Ptn,Esrrb,Angpt2,Cited1,Prrx2,Tfap2b	36/-
2_Member	GO Biological Processes	GO:0061180	mammary gland epithelium development	-6.45725	-2.49642	11839,17701,17702,18612,18667,19116,20496,20850,21386	Areg,Msx1,Msx2,Etv4,Pgr,Prlr,Slc12a2,Stat5a,Tbx3	9/69
2_Member	GO Biological Processes	GO:0060443	mammary gland morphogenesis	-5.99028	-2.40406	11839,17702,18612,18667,20496,20850,21385,21386	Areg,Msx2,Etv4,Pgr,Slc12a2,Stat5a,Tbx2,Tbx3	8/58
2_Member	GO Biological Processes	GO:0022612	gland morphogenesis	-5.96328	-2.40406	11839,15375,17702,18612,18667,20346,20496,20850,21385,21386,21817	Areg,Foxa1,Msx2,Etv4,Pgr,Sema3a,Slc12a2,Stat5a,Tbx2,Tbx3,Tgm2	11/126
2_Member	GO Biological Processes	GO:0060444	branching involved in mammary gland duct morphogenesis	-5.88777	-2.40406	11839,17702,18612,18667,20496,21386	Areg,Msx2,Etv4,Pgr,Slc12a2,Tbx3	6/27
2_Member	GO Biological Processes	GO:0001763	morphogenesis of a branching structure	-5.22733	-2.00686	11839,12817,13392,14164,15375,17702,18612,18667,20346,20496,21385,21386,21817	Areg,Col13a1,Dlx2,Fgf1,Foxa1,Msx2,Etv4,Pgr,Sema3a,Slc12a2,Tbx2,Tbx3,Tgm2	13/211
2_Member	GO Biological Processes	GO:0030879	mammary gland development	-5.05865	-1.91074	11839,12583,17701,17702,18612,18667,19116,20496,20850,21385,21386	Areg,Cdo1,Msx1,Msx2,Etv4,Pgr,Prlr,Slc12a2,Stat5a,Tbx2,Tbx3	11/156
2_Member	GO Biological Processes	GO:0060603	mammary gland duct morphogenesis	-4.90422	-1.78849	11839,17702,18612,18667,20496,21386	Areg,Msx2,Etv4,Pgr,Slc12a2,Tbx3	6/39
2_Member	GO Biological Processes	GO:0048732	gland development	-4.77759	-1.71986	11839,12583,14174,14461,14462,15375,17701,17702,18612,18667,19116,19123,20346,20496,20850,21385,21386,21817,83429	Areg,Cdo1,Fgf3,Gata2,Gata3,Foxa1,Msx1,Msx2,Etv4,Pgr,Prlr,Proc,Sema3a,Slc12a2,Stat5a,Tbx2,Tbx3,Tgm2,Ctns	19/461
2_Member	GO Biological Processes	GO:0061138	morphogenesis of a branching epithelium	-4.062	-1.2473	11839,14164,15375,17702,18612,18667,20346,20496,21385,21386,21817	Areg,Fgf1,Foxa1,Msx2,Etv4,Pgr,Sema3a,Slc12a2,Tbx2,Tbx3,Tgm2	11/200
2_Member	GO Biological Processes	GO:0048754	branching morphogenesis of an epithelial tube	-3.35715	-0.889757	11839,14164,15375,17702,18612,18667,20496,21385,21386	Areg,Fgf1,Foxa1,Msx2,Etv4,Pgr,Slc12a2,Tbx2,Tbx3	9/167
2_Member	GO Biological Processes	GO:0002009	morphogenesis of an epithelium	-3.03195	-0.724333	11839,14164,14174,14275,14462,15375,17702,18612,18667,20346,20496,20850,21385,21386,21817,56079,83429	Areg,Fgf1,Fgf3,Folr1,Gata3,Foxa1,Msx2,Etv4,Pgr,Sema3a,Slc12a2,Stat5a,Tbx2,Tbx3,Tgm2,Astn2,Ctns	17/533
2_Member	GO Biological Processes	GO:0048729	tissue morphogenesis	-2.90178	-0.664175	11839,14164,14174,14275,14462,15375,17701,17702,18612,18667,20346,20496,20850,21385,21386,21817,56079,83429,218476	Areg,Fgf1,Fgf3,Folr1,Gata3,Foxa1,Msx1,Msx2,Etv4,Pgr,Sema3a,Slc12a2,Stat5a,Tbx2,Tbx3,Tgm2,Astn2,Ctns,Gcnt4	19/647
2_Member	GO Biological Processes	GO:0060562	epithelial tube morphogenesis	-2.81424	-0.59771	11839,14164,14174,14275,14462,15375,17702,18612,18667,20496,21385,21386,83429	Areg,Fgf1,Fgf3,Folr1,Gata3,Foxa1,Msx2,Etv4,Pgr,Slc12a2,Tbx2,Tbx3,Ctns	13/369
2_Member	GO Biological Processes	GO:0060560	developmental growth involved in morphogenesis	-2.16782	-0.291565	11839,14164,17755,20346,20361,20496,21385	Areg,Fgf1,Map1b,Sema3a,Sema7a,Slc12a2,Tbx2	7/164
2_Member	GO Biological Processes	GO:0048589	developmental growth	-2.13343	-0.275387	11609,11839,12167,14164,14462,17702,17755,19094,19116,19242,20346,20361,20496,21385,26380	Agtr2,Areg,Bmpr1b,Fgf1,Gata3,Msx2,Map1b,Mapk11,Prlr,Ptn,Sema3a,Sema7a,Slc12a2,Tbx2,Esrrb	15/547
2_Member	GO Biological Processes	GO:0035239	tube morphogenesis	-2.13083	-0.275387	11601,11839,12705,14164,14174,14275,14461,14462,15375,17702,18612,18667,20204,20496,21385,21386,21419,21817,83429	Angpt2,Areg,Cited1,Fgf1,Fgf3,Folr1,Gata2,Gata3,Foxa1,Msx2,Etv4,Pgr,Prrx2,Slc12a2,Tbx2,Tbx3,Tfap2b,Tgm2,Ctns	19/762
2_Member	GO Biological Processes	GO:0040007	growth	-2.09903	-0.269344	11609,11839,12167,14164,14462,17702,17755,19094,19116,19242,20346,20361,20496,21385,26380	Agtr2,Areg,Bmpr1b,Fgf1,Gata3,Msx2,Map1b,Mapk11,Prlr,Ptn,Sema3a,Sema7a,Slc12a2,Tbx2,Esrrb	15/552
3_Summary	GO Biological Processes	GO:0014848	urinary tract smooth muscle contraction	-5.94653	-2.40406	16531,21385,21386,228139,231602,18439,22068,71960,195208,54377,12494,18126,241489,11554,12287,17450,19699,98660,12583,12705,68312,233571,11936,16497,18798,20496,20522,56089,56543,66972,214112,241794,104156,53623,76408	Kcnma1,Tbx2,Tbx3,P2rx3,P2rx2,P2rx7,Trpc6,Myh14,Dcdc2a,Cacng4,Cd38,Nos2,Pde11a,Adrb1,Cacna1b,Morc1,Reln,Atp1a2,Cdo1,Cited1,Gstm7,P2ry6,Fxyd2,Kcnab1,Plcb4,Slc12a2,Slc23a1,Ramp3,Kcnd3,Slc25a23,Nipal4,Kcng1,Etv5,Gria3,Abcc3	35/-
3_Member	GO Biological Processes	GO:0014848	urinary tract smooth muscle contraction	-5.94653	-2.40406	16531,21385,21386,228139,231602	Kcnma1,Tbx2,Tbx3,P2rx3,P2rx2	5/15
3_Member	Reactome Gene Sets	R-MMU-139853	Elevation of cytosolic Ca2+ levels	-4.8402	-1.75444	18439,22068,228139,231602	P2rx7,Trpc6,P2rx3,P2rx2	4/12
3_Member	GO Biological Processes	GO:0030432	peristalsis	-4.54359	-1.537	21385,21386,228139,231602	Tbx2,Tbx3,P2rx3,P2rx2	4/14
3_Member	GO Biological Processes	GO:0019228	neuronal action potential	-4.27034	-1.38869	16531,18439,71960,195208,228139,231602	Kcnma1,P2rx7,Myh14,Dcdc2a,P2rx3,P2rx2	6/50
3_Member	GO Biological Processes	GO:0019226	transmission of nerve impulse	-3.8001	-1.10249	16531,18439,54377,71960,195208,228139,231602	Kcnma1,P2rx7,Cacng4,Myh14,Dcdc2a,P2rx3,P2rx2	7/86
3_Member	GO Biological Processes	GO:0006939	smooth muscle contraction	-3.7026	-1.06399	12494,16531,21385,21386,228139,231602	Cd38,Kcnma1,Tbx2,Tbx3,P2rx3,P2rx2	6/63
3_Member	GO Biological Processes	GO:0014821	phasic smooth muscle contraction	-3.6382	-1.01979	21385,21386,228139,231602	Tbx2,Tbx3,P2rx3,P2rx2	4/23
3_Member	Reactome Gene Sets	R-MMU-418360	Platelet calcium homeostasis	-3.4245	-0.921873	18439,22068,228139,231602	P2rx7,Trpc6,P2rx3,P2rx2	4/26
3_Member	Reactome Gene Sets	R-MMU-418346	Platelet homeostasis	-3.35227	-0.889757	18126,18439,22068,228139,231602,241489	Nos2,P2rx7,Trpc6,P2rx3,P2rx2,Pde11a	6/73
3_Member	GO Biological Processes	GO:0014832	urinary bladder smooth muscle contraction	-3.31774	-0.875425	16531,228139,231602	Kcnma1,P2rx3,P2rx2	3/12
3_Member	GO Biological Processes	GO:0033555	multicellular organismal response to stress	-3.21768	-0.825055	11554,12287,17450,19699,98660,228139,231602	Adrb1,Cacna1b,Morc1,Reln,Atp1a2,P2rx3,P2rx2	7/107
3_Member	GO Biological Processes	GO:0014074	response to purine-containing compound	-3.00955	-0.722075	12583,12705,18439,68312,228139,231602,233571	Cdo1,Cited1,P2rx7,Gstm7,P2rx3,P2rx2,P2ry6	7/116
3_Member	GO Biological Processes	GO:0046683	response to organophosphorus	-2.6819	-0.527248	12583,12705,18439,228139,231602,233571	Cdo1,Cited1,P2rx7,P2rx3,P2rx2,P2ry6	6/98
3_Member	GO Biological Processes	GO:0030001	metal ion transport	-2.63252	-0.501438	11936,12287,16497,16531,18439,18798,20496,20522,22068,54377,56089,56543,66972,98660,214112,228139,231602,241794	Fxyd2,Cacna1b,Kcnab1,Kcnma1,P2rx7,Plcb4,Slc12a2,Slc23a1,Trpc6,Cacng4,Ramp3,Kcnd3,Slc25a23,Atp1a2,Nipal4,P2rx3,P2rx2,Kcng1	18/632
3_Member	GO Biological Processes	GO:0001508	action potential	-2.53122	-0.479316	16531,18439,71960,195208,228139,231602	Kcnma1,P2rx7,Myh14,Dcdc2a,P2rx3,P2rx2	6/105
3_Member	GO Biological Processes	GO:0048265	response to pain	-2.44358	-0.451236	12287,19699,228139,231602	Cacna1b,Reln,P2rx3,P2rx2	4/47
3_Member	GO Biological Processes	GO:0070588	calcium ion transmembrane transport	-2.3586	-0.410075	12287,18439,18798,22068,54377,66972,228139,231602	Cacna1b,P2rx7,Plcb4,Trpc6,Cacng4,Slc25a23,P2rx3,P2rx2	8/191
3_Member	GO Biological Processes	GO:0007274	neuromuscular synaptic transmission	-2.21364	-0.320995	104156,228139,231602	Etv5,P2rx3,P2rx2	3/28
3_Member	GO Biological Processes	GO:0006816	calcium ion transport	-2.1098	-0.269344	12287,18439,18798,22068,54377,56089,66972,228139,231602	Cacna1b,P2rx7,Plcb4,Trpc6,Cacng4,Ramp3,Slc25a23,P2rx3,P2rx2	9/255
3_Member	GO Biological Processes	GO:0034220	monoatomic ion transmembrane transport	-2.10762	-0.269344	11936,12287,16497,16531,18439,18798,20496,22068,53623,54377,56543,66972,76408,98660,228139,231602,241794	Fxyd2,Cacna1b,Kcnab1,Kcnma1,P2rx7,Plcb4,Slc12a2,Trpc6,Gria3,Cacng4,Kcnd3,Slc25a23,Abcc3,Atp1a2,P2rx3,P2rx2,Kcng1	17/657
3_Member	GO Biological Processes	GO:0006812	monoatomic cation transport	-2.09098	-0.269344	11936,12287,16497,16531,18439,18798,20496,20522,22068,54377,56089,56543,66972,98660,214112,228139,231602,241794	Fxyd2,Cacna1b,Kcnab1,Kcnma1,P2rx7,Plcb4,Slc12a2,Slc23a1,Trpc6,Cacng4,Ramp3,Kcnd3,Slc25a23,Atp1a2,Nipal4,P2rx3,P2rx2,Kcng1	18/714
3_Member	GO Biological Processes	GO:0033198	response to ATP	-2.08907	-0.269344	18439,228139,231602	P2rx7,P2rx3,P2rx2	3/31
4_Summary	GO Biological Processes	GO:0010959	regulation of metal ion transport	-5.76977	-2.35301	11517,11554,11936,12287,12504,12805,13400,15444,16497,18439,18798,19700,20856,22068,66109,68312,71912,98660,110784,217154,19699,11847,20539,54377	Adcyap1r1,Adrb1,Fxyd2,Cacna1b,Cd4,Cntn1,Dmpk,Hpca,Kcnab1,P2rx7,Plcb4,Rem1,Stc2,Trpc6,Tspan13,Gstm7,Jsrp1,Atp1a2,Nr3c2,Stac2,Reln,Arg2,Slc7a5,Cacng4	24/-
4_Member	GO Biological Processes	GO:0010959	regulation of metal ion transport	-5.76977	-2.35301	11517,11554,11936,12287,12504,12805,13400,15444,16497,18439,18798,19700,20856,22068,66109,68312,71912,98660,110784,217154	Adcyap1r1,Adrb1,Fxyd2,Cacna1b,Cd4,Cntn1,Dmpk,Hpca,Kcnab1,P2rx7,Plcb4,Rem1,Stc2,Trpc6,Tspan13,Gstm7,Jsrp1,Atp1a2,Nr3c2,Stac2	20/431
4_Member	GO Biological Processes	GO:0043269	regulation of monoatomic ion transport	-5.1407	-1.95802	11517,11554,11936,12287,12504,12805,13400,15444,16497,18439,18798,19699,19700,20856,22068,66109,68312,71912,98660,110784,217154	Adcyap1r1,Adrb1,Fxyd2,Cacna1b,Cd4,Cntn1,Dmpk,Hpca,Kcnab1,P2rx7,Plcb4,Reln,Rem1,Stc2,Trpc6,Tspan13,Gstm7,Jsrp1,Atp1a2,Nr3c2,Stac2	21/516
4_Member	GO Biological Processes	GO:0051924	regulation of calcium ion transport	-4.58997	-1.55856	11517,11554,12287,12504,15444,18439,19700,20856,22068,66109,68312,71912,98660,217154	Adcyap1r1,Adrb1,Cacna1b,Cd4,Hpca,P2rx7,Rem1,Stc2,Trpc6,Tspan13,Gstm7,Jsrp1,Atp1a2,Stac2	14/278
4_Member	GO Biological Processes	GO:0034765	regulation of monoatomic ion transmembrane transport	-4.41158	-1.42848	11517,11554,11936,12504,15444,16497,18439,19699,19700,22068,66109,68312,71912,98660,110784,217154	Adcyap1r1,Adrb1,Fxyd2,Cd4,Hpca,Kcnab1,P2rx7,Reln,Rem1,Trpc6,Tspan13,Gstm7,Jsrp1,Atp1a2,Nr3c2,Stac2	16/366
4_Member	GO Biological Processes	GO:1903169	regulation of calcium ion transmembrane transport	-4.38923	-1.42841	11517,11554,12504,15444,18439,19700,66109,68312,71912,98660,217154	Adcyap1r1,Adrb1,Cd4,Hpca,P2rx7,Rem1,Tspan13,Gstm7,Jsrp1,Atp1a2,Stac2	11/184
4_Member	GO Biological Processes	GO:0034762	regulation of transmembrane transport	-4.17235	-1.3386	11517,11554,11847,11936,12504,15444,16497,18439,19699,19700,20539,22068,54377,66109,68312,71912,98660,110784,217154	Adcyap1r1,Adrb1,Arg2,Fxyd2,Cd4,Hpca,Kcnab1,P2rx7,Reln,Rem1,Slc7a5,Trpc6,Cacng4,Tspan13,Gstm7,Jsrp1,Atp1a2,Nr3c2,Stac2	19/511
4_Member	GO Biological Processes	GO:1904062	regulation of monoatomic cation transmembrane transport	-3.82056	-1.10249	11517,11554,11936,12504,15444,16497,18439,19700,66109,68312,71912,98660,110784,217154	Adcyap1r1,Adrb1,Fxyd2,Cd4,Hpca,Kcnab1,P2rx7,Rem1,Tspan13,Gstm7,Jsrp1,Atp1a2,Nr3c2,Stac2	14/328
4_Member	GO Biological Processes	GO:0032412	regulation of monoatomic ion transmembrane transporter activity	-3.78456	-1.10249	11936,15444,16497,19699,19700,22068,54377,68312,71912,110784,217154	Fxyd2,Hpca,Kcnab1,Reln,Rem1,Trpc6,Cacng4,Gstm7,Jsrp1,Nr3c2,Stac2	11/215
4_Member	GO Biological Processes	GO:0022898	regulation of transmembrane transporter activity	-3.61335	-1.01637	11936,15444,16497,19699,19700,22068,54377,68312,71912,110784,217154	Fxyd2,Hpca,Kcnab1,Reln,Rem1,Trpc6,Cacng4,Gstm7,Jsrp1,Nr3c2,Stac2	11/225
4_Member	GO Biological Processes	GO:0032409	regulation of transporter activity	-3.4208	-0.921873	11936,15444,16497,19699,19700,22068,54377,68312,71912,110784,217154	Fxyd2,Hpca,Kcnab1,Reln,Rem1,Trpc6,Cacng4,Gstm7,Jsrp1,Nr3c2,Stac2	11/237
4_Member	GO Biological Processes	GO:0010524	positive regulation of calcium ion transport into cytosol	-2.84924	-0.624807	11517,12504,18439	Adcyap1r1,Cd4,P2rx7	3/17
4_Member	GO Biological Processes	GO:1904427	positive regulation of calcium ion transmembrane transport	-2.72742	-0.533752	11517,11554,12504,18439,68312,217154	Adcyap1r1,Adrb1,Cd4,P2rx7,Gstm7,Stac2	6/96
4_Member	GO Biological Processes	GO:0034767	positive regulation of monoatomic ion transmembrane transport	-2.69951	-0.531071	11517,11554,12504,18439,19699,22068,68312,217154	Adcyap1r1,Adrb1,Cd4,P2rx7,Reln,Trpc6,Gstm7,Stac2	8/168
4_Member	GO Biological Processes	GO:1901019	regulation of calcium ion transmembrane transporter activity	-2.65772	-0.519712	15444,19700,68312,71912,217154	Hpca,Rem1,Gstm7,Jsrp1,Stac2	5/68
4_Member	GO Biological Processes	GO:0051928	positive regulation of calcium ion transport	-2.5765	-0.479316	11517,11554,12504,18439,22068,68312,217154	Adcyap1r1,Adrb1,Cd4,P2rx7,Trpc6,Gstm7,Stac2	7/138
4_Member	GO Biological Processes	GO:0010522	regulation of calcium ion transport into cytosol	-2.57511	-0.479316	11517,12504,18439	Adcyap1r1,Cd4,P2rx7	3/21
4_Member	GO Biological Processes	GO:2001257	regulation of cation channel activity	-2.53122	-0.479316	15444,16497,19700,68312,71912,217154	Hpca,Kcnab1,Rem1,Gstm7,Jsrp1,Stac2	6/105
4_Member	GO Biological Processes	GO:0043270	positive regulation of monoatomic ion transport	-2.27603	-0.356592	11517,11554,12504,12805,18439,19699,22068,68312,217154	Adcyap1r1,Adrb1,Cd4,Cntn1,P2rx7,Reln,Trpc6,Gstm7,Stac2	9/240
4_Member	GO Biological Processes	GO:1901385	regulation of voltage-gated calcium channel activity	-2.25858	-0.350981	15444,19700,217154	Hpca,Rem1,Stac2	3/27
4_Member	GO Biological Processes	GO:0034764	positive regulation of transmembrane transport	-2.253	-0.350981	11517,11554,12504,18439,19699,20539,22068,68312,217154	Adcyap1r1,Adrb1,Cd4,P2rx7,Reln,Slc7a5,Trpc6,Gstm7,Stac2	9/242
5_Summary	KEGG Pathway	mmu04970	Salivary secretion - Mus musculus (house mouse)	-5.63439	-2.27563	11554,11936,12494,16531,18798,20496,71395,98660,224129,11609,19094,29857,54377,11517,12287,18768,19088,243764,22068	Adrb1,Fxyd2,Cd38,Kcnma1,Plcb4,Slc12a2,Cdcp3,Atp1a2,Adcy5,Agtr2,Mapk11,Mapk12,Cacng4,Adcyap1r1,Cacna1b,Pkib,Prkar2b,Chrm2,Trpc6	19/-
5_Member	KEGG Pathway	mmu04970	Salivary secretion - Mus musculus (house mouse)	-5.63439	-2.27563	11554,11936,12494,16531,18798,20496,71395,98660,224129	Adrb1,Fxyd2,Cd38,Kcnma1,Plcb4,Slc12a2,Cdcp3,Atp1a2,Adcy5	9/86
5_Member	KEGG Pathway	mmu04261	Adrenergic signaling in cardiomyocytes - Mus musculus (house mouse)	-3.57492	-1.01637	11554,11609,11936,18798,19094,29857,54377,98660,224129	Adrb1,Agtr2,Fxyd2,Plcb4,Mapk11,Mapk12,Cacng4,Atp1a2,Adcy5	9/156
5_Member	KEGG Pathway	mmu04972	Pancreatic secretion - Mus musculus (house mouse)	-3.05402	-0.736648	11936,12494,16531,18798,20496,98660,224129	Fxyd2,Cd38,Kcnma1,Plcb4,Slc12a2,Atp1a2,Adcy5	7/114
5_Member	KEGG Pathway	mmu04911	Insulin secretion - Mus musculus (house mouse)	-2.97401	-0.698923	11517,11936,16531,18798,98660,224129	Adcyap1r1,Fxyd2,Kcnma1,Plcb4,Atp1a2,Adcy5	6/86
5_Member	WikiPathways	WP553	Calcium regulation in cardiac cells	-2.47361	-0.457269	11554,11936,12287,18768,19088,224129,243764	Adrb1,Fxyd2,Cacna1b,Pkib,Prkar2b,Adcy5,Chrm2	7/144
5_Member	KEGG Pathway	mmu04924	Renin secretion - Mus musculus (house mouse)	-2.44679	-0.451236	11517,11554,16531,18798,224129	Adcyap1r1,Adrb1,Kcnma1,Plcb4,Adcy5	5/76
5_Member	KEGG Pathway	mmu04022	cGMP-PKG signaling pathway - Mus musculus (house mouse)	-2.04617	-0.249699	11554,11936,16531,18798,22068,98660,224129	Adrb1,Fxyd2,Kcnma1,Plcb4,Trpc6,Atp1a2,Adcy5	7/173
6_Summary	GO Biological Processes	GO:0014070	response to organic cyclic compound	-5.46608	-2.16083	11609,11839,12287,12411,12583,12705,14275,15375,17702,18126,18439,18667,20850,21817,26380,54377,56089,67017,68312,71706,94284,98660,110784,224129,228139,231602,233571,330222,12494,16531,20528,20661,67092,68922,20309,20496,26411,74637,21899	Agtr2,Areg,Cacna1b,Cbs,Cdo1,Cited1,Folr1,Foxa1,Msx2,Nos2,P2rx7,Pgr,Stat5a,Tgm2,Esrrb,Cacng4,Ramp3,Fam210b,Gstm7,Slc46a3,Ugt1a6a,Atp1a2,Nr3c2,Adcy5,P2rx3,P2rx2,P2ry6,Sdk1,Cd38,Kcnma1,Slc2a4,Sort1,Gatm,Dnai1,Cxcl15,Slc12a2,Map4k1,Shpk,Tlr6	39/-
6_Member	GO Biological Processes	GO:0014070	response to organic cyclic compound	-5.46608	-2.16083	11609,11839,12287,12411,12583,12705,14275,15375,17702,18126,18439,18667,20850,21817,26380,54377,56089,67017,68312,71706,94284,98660,110784,224129,228139,231602,233571,330222	Agtr2,Areg,Cacna1b,Cbs,Cdo1,Cited1,Folr1,Foxa1,Msx2,Nos2,P2rx7,Pgr,Stat5a,Tgm2,Esrrb,Cacng4,Ramp3,Fam210b,Gstm7,Slc46a3,Ugt1a6a,Atp1a2,Nr3c2,Adcy5,P2rx3,P2rx2,P2ry6,Sdk1	28/794
6_Member	GO Biological Processes	GO:0071407	cellular response to organic cyclic compound	-4.24031	-1.37639	11609,14275,17702,18126,18439,18667,20850,21817,26380,56089,67017,68312,71706,94284,98660,110784,224129,228139,233571	Agtr2,Folr1,Msx2,Nos2,P2rx7,Pgr,Stat5a,Tgm2,Esrrb,Ramp3,Fam210b,Gstm7,Slc46a3,Ugt1a6a,Atp1a2,Nr3c2,Adcy5,P2rx3,P2ry6	19/505
6_Member	GO Biological Processes	GO:0009725	response to hormone	-2.5185	-0.479316	11609,11839,12494,12583,12705,16531,18126,18667,20528,20661,20850,26380,56089,67092,68922,94284,98660,110784,233571	Agtr2,Areg,Cd38,Cdo1,Cited1,Kcnma1,Nos2,Pgr,Slc2a4,Sort1,Stat5a,Esrrb,Ramp3,Gatm,Dnai1,Ugt1a6a,Atp1a2,Nr3c2,P2ry6	19/700
6_Member	GO Biological Processes	GO:0048545	response to steroid hormone	-2.34506	-0.405418	11609,11839,12583,18667,26380,94284,98660,110784	Agtr2,Areg,Cdo1,Pgr,Esrrb,Ugt1a6a,Atp1a2,Nr3c2	8/192
6_Member	GO Biological Processes	GO:0071383	cellular response to steroid hormone stimulus	-2.24726	-0.349014	11609,18667,26380,94284,98660,110784	Agtr2,Pgr,Esrrb,Ugt1a6a,Atp1a2,Nr3c2	6/120
6_Member	GO Biological Processes	GO:0071396	cellular response to lipid	-2.10433	-0.269344	11609,17702,18126,18667,20309,20496,26380,26411,56089,67017,74637,94284,98660,110784,224129,233571	Agtr2,Msx2,Nos2,Pgr,Cxcl15,Slc12a2,Esrrb,Map4k1,Ramp3,Fam210b,Shpk,Ugt1a6a,Atp1a2,Nr3c2,Adcy5,P2ry6	16/604
6_Member	GO Biological Processes	GO:1901652	response to peptide	-2.08962	-0.269344	11609,12287,12583,12705,20528,20661,20850,21899,56089,67092,68922,110784	Agtr2,Cacna1b,Cdo1,Cited1,Slc2a4,Sort1,Stat5a,Tlr6,Ramp3,Gatm,Dnai1,Nr3c2	12/400
7_Summary	GO Biological Processes	GO:0045666	positive regulation of neuron differentiation	-5.42268	-2.16083	13390,13392,14461,15375,17755,18546,20408,22068,67468,104156,19699,20346,20361,98660,21386,242620,12805,16669,21385,19242,94185	Dlx1,Dlx2,Gata2,Foxa1,Map1b,Pcp4,Sh3gl3,Trpc6,Mmd,Etv5,Reln,Sema3a,Sema7a,Atp1a2,Tbx3,Dmrta2,Cntn1,Krt19,Tbx2,Ptn,Tnfrsf21	21/-
7_Member	GO Biological Processes	GO:0045666	positive regulation of neuron differentiation	-5.42268	-2.16083	13390,13392,14461,15375,17755,18546,20408,22068,67468,104156	Dlx1,Dlx2,Gata2,Foxa1,Map1b,Pcp4,Sh3gl3,Trpc6,Mmd,Etv5	10/116
7_Member	GO Biological Processes	GO:0045664	regulation of neuron differentiation	-3.2996	-0.868916	13390,13392,14461,15375,17755,18546,19699,20408,22068,67468,104156	Dlx1,Dlx2,Gata2,Foxa1,Map1b,Pcp4,Reln,Sh3gl3,Trpc6,Mmd,Etv5	11/245
7_Member	GO Biological Processes	GO:0097154	GABAergic neuron differentiation	-2.45934	-0.451236	13390,13392,14461	Dlx1,Dlx2,Gata2	3/23
7_Member	GO Biological Processes	GO:0021879	forebrain neuron differentiation	-2.37788	-0.41358	13390,13392,14461,20346	Dlx1,Dlx2,Gata2,Sema3a	4/49
7_Member	GO Biological Processes	GO:0021988	olfactory lobe development	-2.25547	-0.350981	13392,20346,20361,98660	Dlx2,Sema3a,Sema7a,Atp1a2	4/53
7_Member	GO Biological Processes	GO:0021761	limbic system development	-2.24726	-0.349014	13390,13392,19699,20346,21386,98660	Dlx1,Dlx2,Reln,Sema3a,Tbx3,Atp1a2	6/120
7_Member	GO Biological Processes	GO:0048663	neuron fate commitment	-2.136	-0.275387	13390,13392,14461,15375,242620	Dlx1,Dlx2,Gata2,Foxa1,Dmrta2	5/90
7_Member	GO Biological Processes	GO:0007219	Notch signaling pathway	-2.12994	-0.275387	12805,13390,13392,15375,16669,21385	Cntn1,Dlx1,Dlx2,Foxa1,Krt19,Tbx2	6/127
7_Member	GO Biological Processes	GO:0048713	regulation of oligodendrocyte differentiation	-2.09106	-0.269344	13390,13392,19242,94185	Dlx1,Dlx2,Ptn,Tnfrsf21	4/59
7_Member	GO Biological Processes	GO:0050768	negative regulation of neurogenesis	-2.02032	-0.231609	13390,13392,14461,19242,20346,20361,22068	Dlx1,Dlx2,Gata2,Ptn,Sema3a,Sema7a,Trpc6	7/175
8_Summary	GO Biological Processes	GO:0045932	negative regulation of muscle contraction	-4.3419	-1.41246	11554,11847,16531,68813,98660,11609,12287,12494,13400,20346,56543,104099,243764,19700,19699,54377,56216,94185,11519,12411,17755,18439,20361,20496,22351,225115,545481,18126,56089,100952,110784,231602	Adrb1,Arg2,Kcnma1,Dock5,Atp1a2,Agtr2,Cacna1b,Cd38,Dmpk,Sema3a,Kcnd3,Itga9,Chrm2,Rem1,Reln,Cacng4,Stx1b,Tnfrsf21,Add2,Cbs,Map1b,P2rx7,Sema7a,Slc12a2,Vill,Svil,Arhgap40,Nos2,Ramp3,Emilin1,Nr3c2,P2rx2	32/-
8_Member	GO Biological Processes	GO:0045932	negative regulation of muscle contraction	-4.3419	-1.41246	11554,11847,16531,68813,98660	Adrb1,Arg2,Kcnma1,Dock5,Atp1a2	5/30
8_Member	GO Biological Processes	GO:1903522	regulation of blood circulation	-2.95341	-0.691556	11554,11609,12287,12494,13400,20346,56543,68813,98660,104099,243764	Adrb1,Agtr2,Cacna1b,Cd38,Dmpk,Sema3a,Kcnd3,Dock5,Atp1a2,Itga9,Chrm2	11/270
8_Member	GO Biological Processes	GO:0006937	regulation of muscle contraction	-2.71574	-0.531071	11554,11847,13400,16531,19700,68813,98660,243764	Adrb1,Arg2,Dmpk,Kcnma1,Rem1,Dock5,Atp1a2,Chrm2	8/167
8_Member	GO Biological Processes	GO:0045986	negative regulation of smooth muscle contraction	-2.70404	-0.531071	11554,16531,68813	Adrb1,Kcnma1,Dock5	3/19
8_Member	GO Biological Processes	GO:0006940	regulation of smooth muscle contraction	-2.62976	-0.501438	11554,16531,68813,98660,243764	Adrb1,Kcnma1,Dock5,Atp1a2,Chrm2	5/69
8_Member	GO Biological Processes	GO:0044057	regulation of system process	-2.53857	-0.479316	11554,11609,11847,12287,12494,13400,16531,19699,19700,20346,54377,56216,56543,68813,94185,98660,104099,243764	Adrb1,Agtr2,Arg2,Cacna1b,Cd38,Dmpk,Kcnma1,Reln,Rem1,Sema3a,Cacng4,Stx1b,Kcnd3,Dock5,Tnfrsf21,Atp1a2,Itga9,Chrm2	18/645
8_Member	GO Biological Processes	GO:0090066	regulation of anatomical structure size	-2.52878	-0.479316	11519,11554,11609,12411,12494,16531,17755,18439,20346,20361,20496,22351,68813,98660,104099,225115,545481	Add2,Adrb1,Agtr2,Cbs,Cd38,Kcnma1,Map1b,P2rx7,Sema3a,Sema7a,Slc12a2,Vill,Dock5,Atp1a2,Itga9,Svil,Arhgap40	17/595
8_Member	GO Biological Processes	GO:0035296	regulation of tube diameter	-2.37224	-0.41358	11554,11609,12411,12494,16531,68813,98660,104099	Adrb1,Agtr2,Cbs,Cd38,Kcnma1,Dock5,Atp1a2,Itga9	8/190
8_Member	GO Biological Processes	GO:0097746	blood vessel diameter maintenance	-2.37224	-0.41358	11554,11609,12411,12494,16531,68813,98660,104099	Adrb1,Agtr2,Cbs,Cd38,Kcnma1,Dock5,Atp1a2,Itga9	8/190
8_Member	GO Biological Processes	GO:0035150	regulation of tube size	-2.3586	-0.410075	11554,11609,12411,12494,16531,68813,98660,104099	Adrb1,Agtr2,Cbs,Cd38,Kcnma1,Dock5,Atp1a2,Itga9	8/191
8_Member	GO Biological Processes	GO:0008016	regulation of heart contraction	-2.29184	-0.362422	11554,11609,12287,13400,20346,56543,98660,243764	Adrb1,Agtr2,Cacna1b,Dmpk,Sema3a,Kcnd3,Atp1a2,Chrm2	8/196
8_Member	GO Biological Processes	GO:0003013	circulatory system process	-2.21004	-0.319253	11554,11609,12287,12411,12494,16531,18126,56089,68813,98660,100952,104099,110784,231602	Adrb1,Agtr2,Cacna1b,Cbs,Cd38,Kcnma1,Nos2,Ramp3,Dock5,Atp1a2,Emilin1,Itga9,Nr3c2,P2rx2	14/485
8_Member	GO Biological Processes	GO:0006942	regulation of striated muscle contraction	-2.136	-0.275387	11554,11847,13400,19700,98660	Adrb1,Arg2,Dmpk,Rem1,Atp1a2	5/90
8_Member	GO Biological Processes	GO:0008015	blood circulation	-2.06806	-0.25336	11554,11609,12287,12411,12494,16531,18126,68813,98660,100952,104099,110784,231602	Adrb1,Agtr2,Cacna1b,Cbs,Cd38,Kcnma1,Nos2,Dock5,Atp1a2,Emilin1,Itga9,Nr3c2,P2rx2	13/453
9_Summary	GO Biological Processes	GO:0048839	inner ear development	-4.30788	-1.40775	14174,14461,14462,15444,16531,17701,20204,21385,21386,26380,57266,241226,12167,19126,19242,21419,23928,83429,13392,14275,17389,12705,16669,53601	Fgf3,Gata2,Gata3,Hpca,Kcnma1,Msx1,Prrx2,Tbx2,Tbx3,Esrrb,Cxcl14,Itga8,Bmpr1b,Prom1,Ptn,Tfap2b,Lamc3,Ctns,Dlx2,Folr1,Mmp16,Cited1,Krt19,Pcdh12	24/-
9_Member	GO Biological Processes	GO:0048839	inner ear development	-4.30788	-1.40775	14174,14461,14462,15444,16531,17701,20204,21385,21386,26380,57266,241226	Fgf3,Gata2,Gata3,Hpca,Kcnma1,Msx1,Prrx2,Tbx2,Tbx3,Esrrb,Cxcl14,Itga8	12/222
9_Member	GO Biological Processes	GO:0043583	ear development	-3.73784	-1.08848	14174,14461,14462,15444,16531,17701,20204,21385,21386,26380,57266,241226	Fgf3,Gata2,Gata3,Hpca,Kcnma1,Msx1,Prrx2,Tbx2,Tbx3,Esrrb,Cxcl14,Itga8	12/255
9_Member	GO Biological Processes	GO:0060872	semicircular canal development	-3.31774	-0.875425	14174,14461,21386	Fgf3,Gata2,Tbx3	3/12
9_Member	GO Biological Processes	GO:0042471	ear morphogenesis	-3.10861	-0.776605	14174,14461,14462,17701,20204,21385,21386,241226	Fgf3,Gata2,Gata3,Msx1,Prrx2,Tbx2,Tbx3,Itga8	8/145
9_Member	GO Biological Processes	GO:0042472	inner ear morphogenesis	-2.90244	-0.664175	14174,14461,14462,20204,21385,21386,241226	Fgf3,Gata2,Gata3,Prrx2,Tbx2,Tbx3,Itga8	7/121
9_Member	GO Biological Processes	GO:0007423	sensory organ development	-2.51735	-0.479316	12167,14174,14461,14462,15444,16531,17701,19126,19242,20204,21385,21386,21419,23928,26380,57266,83429,241226	Bmpr1b,Fgf3,Gata2,Gata3,Hpca,Kcnma1,Msx1,Prom1,Ptn,Prrx2,Tbx2,Tbx3,Tfap2b,Lamc3,Esrrb,Cxcl14,Ctns,Itga8	18/648
9_Member	GO Biological Processes	GO:0048562	embryonic organ morphogenesis	-2.25375	-0.350981	13392,14174,14275,14461,14462,17389,17701,20204,21385,21386,241226	Dlx2,Fgf3,Folr1,Gata2,Gata3,Mmp16,Msx1,Prrx2,Tbx2,Tbx3,Itga8	11/333
9_Member	GO Biological Processes	GO:0048568	embryonic organ development	-2.23995	-0.343583	12705,13392,14174,14275,14461,14462,16669,17389,17701,20204,21385,21386,26380,53601,241226	Cited1,Dlx2,Fgf3,Folr1,Gata2,Gata3,Krt19,Mmp16,Msx1,Prrx2,Tbx2,Tbx3,Esrrb,Pcdh12,Itga8	15/532
10_Summary	GO Biological Processes	GO:0003012	muscle system process	-4.16909	-1.3386	11609,11847,12494,13400,16531,21385,21386,67092,71912,71960,217154,228139,231602	Agtr2,Arg2,Cd38,Dmpk,Kcnma1,Tbx2,Tbx3,Gatm,Jsrp1,Myh14,Stac2,P2rx3,P2rx2	13/-
10_Member	GO Biological Processes	GO:0003012	muscle system process	-4.16909	-1.3386	11609,11847,12494,13400,16531,21385,21386,67092,71912,71960,217154,228139,231602	Agtr2,Arg2,Cd38,Dmpk,Kcnma1,Tbx2,Tbx3,Gatm,Jsrp1,Myh14,Stac2,P2rx3,P2rx2	13/266
10_Member	GO Biological Processes	GO:0006936	muscle contraction	-4.02347	-1.22401	11847,12494,13400,16531,21385,21386,71912,71960,217154,228139,231602	Arg2,Cd38,Dmpk,Kcnma1,Tbx2,Tbx3,Jsrp1,Myh14,Stac2,P2rx3,P2rx2	11/202
10_Member	GO Biological Processes	GO:0003009	skeletal muscle contraction	-3.23719	-0.832665	13400,71912,71960,217154	Dmpk,Jsrp1,Myh14,Stac2	4/29
10_Member	GO Biological Processes	GO:0050881	musculoskeletal movement	-2.47767	-0.458852	13400,71912,71960,217154	Dmpk,Jsrp1,Myh14,Stac2	4/46
10_Member	GO Biological Processes	GO:0050879	multicellular organismal movement	-2.3462	-0.405418	13400,71912,71960,217154	Dmpk,Jsrp1,Myh14,Stac2	4/50
11_Summary	GO Biological Processes	GO:0030856	regulation of epithelial cell differentiation	-3.89852	-1.12332	12705,14462,17701,17702,18612,19116,19123,19126,20850,21386	Cited1,Gata3,Msx1,Msx2,Etv4,Prlr,Proc,Prom1,Stat5a,Tbx3	10/-
11_Member	GO Biological Processes	GO:0030856	regulation of epithelial cell differentiation	-3.89852	-1.12332	12705,14462,17701,17702,18612,19116,19123,19126,20850,21386	Cited1,Gata3,Msx1,Msx2,Etv4,Prlr,Proc,Prom1,Stat5a,Tbx3	10/174
11_Member	GO Biological Processes	GO:2000696	regulation of epithelial cell differentiation involved in kidney development	-2.84924	-0.624807	12705,14462,19126	Cited1,Gata3,Prom1	3/17
12_Summary	GO Biological Processes	GO:0007411	axon guidance	-3.88316	-1.12332	12167,12805,14009,14462,18612,19699,20346,20361,22253,23928,107448,108699,14275,17755,94185,19242,195208,18008,17701,18439,26380,67252,16669	Bmpr1b,Cntn1,Etv1,Gata3,Etv4,Reln,Sema3a,Sema7a,Unc5c,Lamc3,Unc5a,Chn1,Folr1,Map1b,Tnfrsf21,Ptn,Dcdc2a,Nes,Msx1,P2rx7,Esrrb,Cap2,Krt19	23/-
12_Member	GO Biological Processes	GO:0007411	axon guidance	-3.88316	-1.12332	12167,12805,14009,14462,18612,19699,20346,20361,22253,23928,107448,108699	Bmpr1b,Cntn1,Etv1,Gata3,Etv4,Reln,Sema3a,Sema7a,Unc5c,Lamc3,Unc5a,Chn1	12/246
12_Member	GO Biological Processes	GO:0097485	neuron projection guidance	-3.86666	-1.12332	12167,12805,14009,14462,18612,19699,20346,20361,22253,23928,107448,108699	Bmpr1b,Cntn1,Etv1,Gata3,Etv4,Reln,Sema3a,Sema7a,Unc5c,Lamc3,Unc5a,Chn1	12/247
12_Member	GO Biological Processes	GO:0061564	axon development	-2.93378	-0.680524	12167,12805,14009,14275,14462,17755,18612,19699,20346,20361,22253,23928,94185,107448,108699	Bmpr1b,Cntn1,Etv1,Folr1,Gata3,Map1b,Etv4,Reln,Sema3a,Sema7a,Unc5c,Lamc3,Tnfrsf21,Unc5a,Chn1	15/449
12_Member	GO Biological Processes	GO:0007409	axonogenesis	-2.53804	-0.479316	12167,12805,14009,14462,17755,18612,19699,20346,20361,22253,23928,107448,108699	Bmpr1b,Cntn1,Etv1,Gata3,Map1b,Etv4,Reln,Sema3a,Sema7a,Unc5c,Lamc3,Unc5a,Chn1	13/397
12_Member	GO Biological Processes	GO:0048667	cell morphogenesis involved in neuron differentiation	-2.48516	-0.461345	12167,12805,14009,14462,17755,18612,19242,19699,20346,20361,22253,23928,107448,108699,195208	Bmpr1b,Cntn1,Etv1,Gata3,Map1b,Etv4,Ptn,Reln,Sema3a,Sema7a,Unc5c,Lamc3,Unc5a,Chn1,Dcdc2a	15/500
12_Member	GO Biological Processes	GO:0048858	cell projection morphogenesis	-2.44759	-0.451236	12167,12805,14009,14462,17755,18008,18612,19242,19699,20346,20361,22253,23928,107448,108699,195208	Bmpr1b,Cntn1,Etv1,Gata3,Map1b,Nes,Etv4,Ptn,Reln,Sema3a,Sema7a,Unc5c,Lamc3,Unc5a,Chn1,Dcdc2a	16/555
12_Member	GO Biological Processes	GO:0000902	cell morphogenesis	-2.35387	-0.410075	12167,12805,14009,14462,17701,17755,18008,18439,18612,19242,19699,20346,20361,22253,23928,26380,67252,107448,108699,195208	Bmpr1b,Cntn1,Etv1,Gata3,Msx1,Map1b,Nes,P2rx7,Etv4,Ptn,Reln,Sema3a,Sema7a,Unc5c,Lamc3,Esrrb,Cap2,Unc5a,Chn1,Dcdc2a	20/779
12_Member	GO Biological Processes	GO:0048812	neuron projection morphogenesis	-2.17543	-0.293779	12167,12805,14009,14462,17755,18612,19242,19699,20346,20361,22253,23928,107448,108699,195208	Bmpr1b,Cntn1,Etv1,Gata3,Map1b,Etv4,Ptn,Reln,Sema3a,Sema7a,Unc5c,Lamc3,Unc5a,Chn1,Dcdc2a	15/541
12_Member	GO Biological Processes	GO:0120039	plasma membrane bounded cell projection morphogenesis	-2.13343	-0.275387	12167,12805,14009,14462,17755,18612,19242,19699,20346,20361,22253,23928,107448,108699,195208	Bmpr1b,Cntn1,Etv1,Gata3,Map1b,Etv4,Ptn,Reln,Sema3a,Sema7a,Unc5c,Lamc3,Unc5a,Chn1,Dcdc2a	15/547
12_Member	GO Biological Processes	GO:0032989	cellular anatomical entity morphogenesis	-2.05233	-0.251128	12167,12805,14009,14462,16669,17755,18008,18612,19242,19699,20346,20361,22253,23928,107448,108699,195208	Bmpr1b,Cntn1,Etv1,Gata3,Krt19,Map1b,Nes,Etv4,Ptn,Reln,Sema3a,Sema7a,Unc5c,Lamc3,Unc5a,Chn1,Dcdc2a	17/666
13_Summary	GO Biological Processes	GO:0001822	kidney development	-3.87603	-1.12332	11601,11609,11847,12931,14164,14462,15139,19126,21419,67092,70350,83429,218476,241226,12705,12971,19699,14174,17701,21385,104156,16531,20856,21386,110784	Angpt2,Agtr2,Arg2,Crlf1,Fgf1,Gata3,Hc,Prom1,Tfap2b,Gatm,Basp1,Ctns,Gcnt4,Itga8,Cited1,Crym,Reln,Fgf3,Msx1,Tbx2,Etv5,Kcnma1,Stc2,Tbx3,Nr3c2	25/-
13_Member	GO Biological Processes	GO:0001822	kidney development	-3.87603	-1.12332	11601,11609,11847,12931,14164,14462,15139,19126,21419,67092,70350,83429,218476,241226	Angpt2,Agtr2,Arg2,Crlf1,Fgf1,Gata3,Hc,Prom1,Tfap2b,Gatm,Basp1,Ctns,Gcnt4,Itga8	14/324
13_Member	GO Biological Processes	GO:0072001	renal system development	-3.65969	-1.0313	11601,11609,11847,12931,14164,14462,15139,19126,21419,67092,70350,83429,218476,241226	Angpt2,Agtr2,Arg2,Crlf1,Fgf1,Gata3,Hc,Prom1,Tfap2b,Gatm,Basp1,Ctns,Gcnt4,Itga8	14/340
13_Member	GO Biological Processes	GO:0018958	phenol-containing compound metabolic process	-3.29192	-0.868916	11609,12705,12971,14462,19699,83429,218476	Agtr2,Cited1,Crym,Gata3,Reln,Ctns,Gcnt4	7/104
13_Member	GO Biological Processes	GO:0072006	nephron development	-3.16814	-0.792778	11601,14164,14462,15139,19126,21419,70350,83429	Angpt2,Fgf1,Gata3,Hc,Prom1,Tfap2b,Basp1,Ctns	8/142
13_Member	GO Biological Processes	GO:0072073	kidney epithelium development	-3.14812	-0.78289	11847,12931,14164,14462,19126,21419,70350,83429	Arg2,Crlf1,Fgf1,Gata3,Prom1,Tfap2b,Basp1,Ctns	8/143
13_Member	GO Biological Processes	GO:0110110	positive regulation of animal organ morphogenesis	-2.70217	-0.531071	14164,14174,14462,17701	Fgf1,Fgf3,Gata3,Msx1	4/40
13_Member	GO Biological Processes	GO:0046189	phenol-containing compound biosynthetic process	-2.66214	-0.519802	11609,12705,14462,83429	Agtr2,Cited1,Gata3,Ctns	4/41
13_Member	GO Biological Processes	GO:1905330	regulation of morphogenesis of an epithelium	-2.5226	-0.479316	11609,14164,14462,21385,104156	Agtr2,Fgf1,Gata3,Tbx2,Etv5	5/73
13_Member	GO Biological Processes	GO:0072009	nephron epithelium development	-2.49047	-0.464141	14164,14462,19126,21419,70350,83429	Fgf1,Gata3,Prom1,Tfap2b,Basp1,Ctns	6/107
13_Member	GO Biological Processes	GO:2000027	regulation of animal organ morphogenesis	-2.43112	-0.443416	11609,14164,14174,14462,17701,104156	Agtr2,Fgf1,Fgf3,Gata3,Msx1,Etv5	6/110
13_Member	GO Biological Processes	GO:0032350	regulation of hormone metabolic process	-2.14355	-0.275387	14462,16531,20856,83429	Gata3,Kcnma1,Stc2,Ctns	4/57
13_Member	GO Biological Processes	GO:0050886	endocrine process	-2.11704	-0.271819	11609,14462,21386,110784	Agtr2,Gata3,Tbx3,Nr3c2	4/58
13_Member	GO Biological Processes	GO:0060993	kidney morphogenesis	-2.00243	-0.227706	11609,14164,14462,83429,218476	Agtr2,Fgf1,Gata3,Ctns,Gcnt4	5/97
14_Summary	GO Biological Processes	GO:0007268	chemical synaptic transmission	-3.79556	-1.10249	11554,12287,13447,16531,18439,20418,53623,56216,77531,104156,195208,228139,231602,243764,320127,12494,14164,14174,18126,18798,13400,19242,19699,56543,71960,83429,110784,19088,20496,54377,64011	Adrb1,Cacna1b,Doc2b,Kcnma1,P2rx7,Shc3,Gria3,Stx1b,Anks1b,Etv5,Dcdc2a,P2rx3,P2rx2,Chrm2,Dgki,Cd38,Fgf1,Fgf3,Nos2,Plcb4,Dmpk,Ptn,Reln,Kcnd3,Myh14,Ctns,Nr3c2,Prkar2b,Slc12a2,Cacng4,Nrgn	31/-
14_Member	GO Biological Processes	GO:0007268	chemical synaptic transmission	-3.79556	-1.10249	11554,12287,13447,16531,18439,20418,53623,56216,77531,104156,195208,228139,231602,243764,320127	Adrb1,Cacna1b,Doc2b,Kcnma1,P2rx7,Shc3,Gria3,Stx1b,Anks1b,Etv5,Dcdc2a,P2rx3,P2rx2,Chrm2,Dgki	15/371
14_Member	GO Biological Processes	GO:0098916	anterograde trans-synaptic signaling	-3.79556	-1.10249	11554,12287,13447,16531,18439,20418,53623,56216,77531,104156,195208,228139,231602,243764,320127	Adrb1,Cacna1b,Doc2b,Kcnma1,P2rx7,Shc3,Gria3,Stx1b,Anks1b,Etv5,Dcdc2a,P2rx3,P2rx2,Chrm2,Dgki	15/371
14_Member	GO Biological Processes	GO:0099537	trans-synaptic signaling	-3.56239	-1.01637	11554,12287,13447,16531,18439,20418,53623,56216,77531,104156,195208,228139,231602,243764,320127	Adrb1,Cacna1b,Doc2b,Kcnma1,P2rx7,Shc3,Gria3,Stx1b,Anks1b,Etv5,Dcdc2a,P2rx3,P2rx2,Chrm2,Dgki	15/390
14_Member	KEGG Pathway	mmu04020	Calcium signaling pathway - Mus musculus (house mouse)	-3.18369	-0.802644	11554,12287,12494,14164,14174,18126,18439,18798,228139,231602,243764	Adrb1,Cacna1b,Cd38,Fgf1,Fgf3,Nos2,P2rx7,Plcb4,P2rx3,P2rx2,Chrm2	11/253
14_Member	GO Biological Processes	GO:0099536	synaptic signaling	-3.00166	-0.722075	11554,12287,13447,16531,18439,20418,53623,56216,77531,104156,195208,228139,231602,243764,320127	Adrb1,Cacna1b,Doc2b,Kcnma1,P2rx7,Shc3,Gria3,Stx1b,Anks1b,Etv5,Dcdc2a,P2rx3,P2rx2,Chrm2,Dgki	15/442
14_Member	GO Biological Processes	GO:0042391	regulation of membrane potential	-2.96252	-0.696298	11554,13400,16531,18439,19242,19699,53623,56216,56543,71960,83429,110784,195208,228139,231602,320127	Adrb1,Dmpk,Kcnma1,P2rx7,Ptn,Reln,Gria3,Stx1b,Kcnd3,Myh14,Ctns,Nr3c2,Dcdc2a,P2rx3,P2rx2,Dgki	16/493
14_Member	GO Biological Processes	GO:0050804	modulation of chemical synaptic transmission	-2.2738	-0.356334	11554,12287,12494,13400,18439,18798,19088,19242,19699,20496,53623,54377,56216,64011,110784,228139,231602,243764,320127	Adrb1,Cacna1b,Cd38,Dmpk,P2rx7,Plcb4,Prkar2b,Ptn,Reln,Slc12a2,Gria3,Cacng4,Stx1b,Nrgn,Nr3c2,P2rx3,P2rx2,Chrm2,Dgki	19/738
14_Member	GO Biological Processes	GO:0099177	regulation of trans-synaptic signaling	-2.26767	-0.352166	11554,12287,12494,13400,18439,18798,19088,19242,19699,20496,53623,54377,56216,64011,110784,228139,231602,243764,320127	Adrb1,Cacna1b,Cd38,Dmpk,P2rx7,Plcb4,Prkar2b,Ptn,Reln,Slc12a2,Gria3,Cacng4,Stx1b,Nrgn,Nr3c2,P2rx3,P2rx2,Chrm2,Dgki	19/739
14_Member	GO Biological Processes	GO:0099565	chemical synaptic transmission, postsynaptic	-2.11704	-0.271819	11554,53623,77531,320127	Adrb1,Gria3,Anks1b,Dgki	4/58
15_Summary	KEGG Pathway	mmu04658	Th1 and Th2 cell differentiation - Mus musculus (house mouse)	-3.73756	-1.08848	12504,14462,16161,16797,19094,20850,29857,16168,19116,12705,74637,19699,72147,14461,12583,71982	Cd4,Gata3,Il12rb1,Lat,Mapk11,Stat5a,Mapk12,Il15,Prlr,Cited1,Shpk,Reln,Zbtb46,Gata2,Cdo1,Snx10	16/-
15_Member	KEGG Pathway	mmu04658	Th1 and Th2 cell differentiation - Mus musculus (house mouse)	-3.73756	-1.08848	12504,14462,16161,16797,19094,20850,29857	Cd4,Gata3,Il12rb1,Lat,Mapk11,Stat5a,Mapk12	7/88
15_Member	GO Biological Processes	GO:0035723	interleukin-15-mediated signaling pathway	-3.57233	-1.01637	12504,16168,20850	Cd4,Il15,Stat5a	3/10
15_Member	GO Biological Processes	GO:0071350	cellular response to interleukin-15	-3.57233	-1.01637	12504,16168,20850	Cd4,Il15,Stat5a	3/10
15_Member	GO Biological Processes	GO:0070672	response to interleukin-15	-3.43835	-0.921873	12504,16168,20850	Cd4,Il15,Stat5a	3/11
15_Member	GO Biological Processes	GO:0097011	cellular response to granulocyte macrophage colony-stimulating factor stimulus	-3.31774	-0.875425	12504,19116,20850	Cd4,Prlr,Stat5a	3/12
15_Member	KEGG Pathway	mmu04659	Th17 cell differentiation - Mus musculus (house mouse)	-3.26689	-0.856288	12504,14462,16161,16797,19094,20850,29857	Cd4,Gata3,Il12rb1,Lat,Mapk11,Stat5a,Mapk12	7/105
15_Member	GO Biological Processes	GO:0097012	response to granulocyte macrophage colony-stimulating factor	-3.20812	-0.821322	12504,19116,20850	Cd4,Prlr,Stat5a	3/13
15_Member	GO Biological Processes	GO:0070670	response to interleukin-4	-3.01922	-0.722075	12705,14462,20850,74637	Cited1,Gata3,Stat5a,Shpk	4/33
15_Member	GO Biological Processes	GO:0018108	peptidyl-tyrosine phosphorylation	-2.57296	-0.479316	12504,16161,16168,19116,19699,20850	Cd4,Il12rb1,Il15,Prlr,Reln,Stat5a	6/103
15_Member	GO Biological Processes	GO:0018212	peptidyl-tyrosine modification	-2.53122	-0.479316	12504,16161,16168,19116,19699,20850	Cd4,Il12rb1,Il15,Prlr,Reln,Stat5a	6/105
15_Member	GO Biological Processes	GO:0030225	macrophage differentiation	-2.51264	-0.479316	12504,14462,16168,72147	Cd4,Gata3,Il15,Zbtb46	4/45
15_Member	GO Biological Processes	GO:0030851	granulocyte differentiation	-2.08907	-0.269344	14461,20850,72147	Gata2,Stat5a,Zbtb46	3/31
15_Member	GO Biological Processes	GO:0071353	cellular response to interleukin-4	-2.08907	-0.269344	14462,20850,74637	Gata3,Stat5a,Shpk	3/31
15_Member	WikiPathways	WP2872	White fat cell differentiation	-2.05059	-0.251128	14461,14462,20850	Gata2,Gata3,Stat5a	3/32
15_Member	GO Biological Processes	GO:0007595	lactation	-2.01346	-0.231609	12583,19116,20850	Cdo1,Prlr,Stat5a	3/33
15_Member	GO Biological Processes	GO:0002573	myeloid leukocyte differentiation	-2.00755	-0.228289	12504,14461,14462,16168,20850,71982,72147	Cd4,Gata2,Gata3,Il15,Stat5a,Snx10,Zbtb46	7/176
16_Summary	GO Biological Processes	GO:0007167	enzyme-linked receptor protein signaling pathway	-3.59177	-1.01637	11601,11839,12167,12223,12705,14164,14174,16797,17701,17702,19116,20418,20661,20850,21385,68922,77531,108699,241226,100042150	Angpt2,Areg,Bmpr1b,Btc,Cited1,Fgf1,Fgf3,Lat,Msx1,Msx2,Prlr,Shc3,Sort1,Stat5a,Tbx2,Dnai1,Anks1b,Chn1,Itga8,Nrg2	20/-
16_Member	GO Biological Processes	GO:0007167	enzyme-linked receptor protein signaling pathway	-3.59177	-1.01637	11601,11839,12167,12223,12705,14164,14174,16797,17701,17702,19116,20418,20661,20850,21385,68922,77531,108699,241226,100042150	Angpt2,Areg,Bmpr1b,Btc,Cited1,Fgf1,Fgf3,Lat,Msx1,Msx2,Prlr,Shc3,Sort1,Stat5a,Tbx2,Dnai1,Anks1b,Chn1,Itga8,Nrg2	20/614
16_Member	GO Biological Processes	GO:0007169	transmembrane receptor protein tyrosine kinase signaling pathway	-3.41216	-0.92115	11601,11839,12223,14164,14174,16797,19116,20418,20661,20850,21385,68922,77531,108699,100042150	Angpt2,Areg,Btc,Fgf1,Fgf3,Lat,Prlr,Shc3,Sort1,Stat5a,Tbx2,Dnai1,Anks1b,Chn1,Nrg2	15/403
17_Summary	GO Biological Processes	GO:0006534	cysteine metabolic process	-3.57233	-1.01637	12411,12583,14598,11847,12036,13171,18126,229905	Cbs,Cdo1,Ggt1,Arg2,Bcat2,Dbt,Nos2,Kyat3	8/-
17_Member	GO Biological Processes	GO:0006534	cysteine metabolic process	-3.57233	-1.01637	12411,12583,14598	Cbs,Cdo1,Ggt1	3/10
17_Member	GO Biological Processes	GO:0009063	amino acid catabolic process	-2.75063	-0.542219	11847,12036,12411,12583,13171,18126	Arg2,Bcat2,Cbs,Cdo1,Dbt,Nos2	6/95
17_Member	GO Biological Processes	GO:1901606	alpha-amino acid catabolic process	-2.44679	-0.451236	11847,12036,12411,12583,18126	Arg2,Bcat2,Cbs,Cdo1,Nos2	5/76
17_Member	KEGG Pathway	mmu00270	Cysteine and methionine metabolism - Mus musculus (house mouse)	-2.1983	-0.313021	12036,12411,12583,229905	Bcat2,Cbs,Cdo1,Kyat3	4/55
17_Member	GO Biological Processes	GO:0000096	sulfur amino acid metabolic process	-2.17049	-0.292446	12411,12583,14598	Cbs,Cdo1,Ggt1	3/29
18_Summary	GO Biological Processes	GO:0003014	renal system process	-3.56223	-1.01637	11554,11609,12223,16531,66972,83429,93835,110784	Adrb1,Agtr2,Btc,Kcnma1,Slc25a23,Ctns,Amn,Nr3c2	8/-
18_Member	GO Biological Processes	GO:0003014	renal system process	-3.56223	-1.01637	11554,11609,12223,16531,66972,83429,93835,110784	Adrb1,Agtr2,Btc,Kcnma1,Slc25a23,Ctns,Amn,Nr3c2	8/124
19_Summary	GO Biological Processes	GO:0003272	endocardial cushion formation	-3.49246	-0.954883	17701,17702,21385,21386,666794,14275,15375,18612,20346,20361,242620,17285,73703,21419,12705,20204	Msx1,Msx2,Tbx2,Tbx3,Rbm24,Folr1,Foxa1,Etv4,Sema3a,Sema7a,Dmrta2,Meox1,Dppa2,Tfap2b,Cited1,Prrx2	16/-
19_Member	GO Biological Processes	GO:0003272	endocardial cushion formation	-3.49246	-0.954883	17701,17702,21385,21386	Msx1,Msx2,Tbx2,Tbx3	4/25
19_Member	GO Biological Processes	GO:0003197	endocardial cushion development	-3.22459	-0.82606	17701,17702,21385,21386,666794	Msx1,Msx2,Tbx2,Tbx3,Rbm24	5/51
19_Member	GO Biological Processes	GO:0048863	stem cell differentiation	-3.10396	-0.776605	14275,15375,17701,17702,18612,20346,20361,21385,21386,242620	Folr1,Foxa1,Msx1,Msx2,Etv4,Sema3a,Sema7a,Tbx2,Tbx3,Dmrta2	10/219
19_Member	GO Biological Processes	GO:0003203	endocardial cushion morphogenesis	-2.78582	-0.57318	17701,17702,21385,21386	Msx1,Msx2,Tbx2,Tbx3	4/38
19_Member	GO Biological Processes	GO:0060485	mesenchyme development	-2.7384	-0.540999	14275,17285,17701,17702,20346,20361,21385,21386,73703,666794	Folr1,Meox1,Msx1,Msx2,Sema3a,Sema7a,Tbx2,Tbx3,Dppa2,Rbm24	10/245
19_Member	GO Biological Processes	GO:0035136	forelimb morphogenesis	-2.44358	-0.451236	17701,17702,21386,21419	Msx1,Msx2,Tbx3,Tfap2b	4/47
19_Member	GO Biological Processes	GO:0035137	hindlimb morphogenesis	-2.37788	-0.41358	17701,17702,21386,21419	Msx1,Msx2,Tbx3,Tfap2b	4/49
19_Member	GO Biological Processes	GO:0060317	cardiac epithelial to mesenchymal transition	-2.35441	-0.410075	17701,17702,21386	Msx1,Msx2,Tbx3	3/25
19_Member	GO Biological Processes	GO:0072132	mesenchyme morphogenesis	-2.25547	-0.350981	17701,17702,21385,21386	Msx1,Msx2,Tbx2,Tbx3	4/53
19_Member	GO Biological Processes	GO:0030857	negative regulation of epithelial cell differentiation	-2.06561	-0.252457	12705,17701,17702,21386	Cited1,Msx1,Msx2,Tbx3	4/60
19_Member	GO Biological Processes	GO:0010463	mesenchymal cell proliferation	-2.05059	-0.251128	17701,20204,21385	Msx1,Prrx2,Tbx2	3/32
20_Summary	GO Biological Processes	GO:0051180	vitamin transport	-3.48007	-0.950604	14275,20522,20528,93835,210027,20661,83429	Folr1,Slc23a1,Slc2a4,Amn,Slc35f3,Sort1,Ctns	7/-
20_Member	GO Biological Processes	GO:0051180	vitamin transport	-3.48007	-0.950604	14275,20522,20528,93835,210027	Folr1,Slc23a1,Slc2a4,Amn,Slc35f3	5/45
20_Member	GO Biological Processes	GO:0015749	monosaccharide transmembrane transport	-2.70217	-0.531071	20522,20528,20661,83429	Slc23a1,Slc2a4,Sort1,Ctns	4/40
20_Member	GO Biological Processes	GO:0034219	carbohydrate transmembrane transport	-2.44358	-0.451236	20522,20528,20661,83429	Slc23a1,Slc2a4,Sort1,Ctns	4/47

## Sheet: Enriched (sgCsnk1a1 vs sgSHL)
GroupID	Category	Term	Description	LogP	Log(q-value)	Genes	Symbols	InTerm_InList
1_Summary	GO Biological Processes	GO:0008544	epidermis development	-37.1726	-32.9108	12023,12159,12399,12614,13047,13393,13608,14160,14284,14313,14632,15422,16001,16175,16450,16600,16664,16675,16678,16679,16680,16681,16688,16769,17918,18205,18590,18988,19206,19207,20423,20754,20861,20863,21808,21818,22061,22409,22410,53622,55948,58208,64661,64818,64929,66042,70810,70843,72383,73750,74127,74591,80859,93735,93746,109052,110308,214922,223915,223917,228357,232077,239673,270893,317653…	Barx2,Bmp4,Runx3,Celsr1,Cux1,Dlx3,Edar,Lgr5,Fosl2,Fst,Gli1,Hoxc13,Igf1r,Il1a,Jag2,Klf4,Krt14,Krt27,Krt1,Krt86,Krt84,Krt2,Krt6b,Dsg4,Myo5a,Ntf3,Pdgfa,Pou2f3,Ptch1,Ptch2,Shh,Sprr1b,Stfa1,Stfa3,Tgfb2,Tgm3,Trp63,Wnt10a,Wnt10b,Krt85,Sfn,Bcl11b,Krtdap,Krt81,Scel,Sostdc1,Krt25,Krt28,Cnfn,Whrn,Krt80,Abca12,Nfkbiz,Wnt16,Gprc5d,Krt75,Krt5,Slc39a2,Krt73,Krt79,Lrp4,Foxi3,Krt90,Tmem132e,Klk14,Cdsn,Krt87,Csta3…	125/-
1_Member	GO Biological Processes	GO:0008544	epidermis development	-37.1726	-32.9108	12023,12159,12399,12614,13047,13393,13608,14160,14284,14313,14632,15422,16001,16175,16450,16600,16664,16675,16678,16679,16680,16681,16688,16769,17918,18205,18590,18988,19206,19207,20423,20754,20861,20863,21808,21818,22061,22409,22410,53622,55948,58208,64661,64818,64929,66042,70810,70843,72383,73750,74127,74591,80859,93735,93746,109052,110308,214922,223915,223917,228357,232077,239673,270893,317653…	Barx2,Bmp4,Runx3,Celsr1,Cux1,Dlx3,Edar,Lgr5,Fosl2,Fst,Gli1,Hoxc13,Igf1r,Il1a,Jag2,Klf4,Krt14,Krt27,Krt1,Krt86,Krt84,Krt2,Krt6b,Dsg4,Myo5a,Ntf3,Pdgfa,Pou2f3,Ptch1,Ptch2,Shh,Sprr1b,Stfa1,Stfa3,Tgfb2,Tgm3,Trp63,Wnt10a,Wnt10b,Krt85,Sfn,Bcl11b,Krtdap,Krt81,Scel,Sostdc1,Krt25,Krt28,Cnfn,Whrn,Krt80,Abca12,Nfkbiz,Wnt16,Gprc5d,Krt75,Krt5,Slc39a2,Krt73,Krt79,Lrp4,Foxi3,Krt90,Tmem132e,Klk14,Cdsn,Krt87,Csta3…	73/352
1_Member	GO Biological Processes	GO:0043588	skin development	-32.4432	-28.4824	12023,12399,12614,13393,13608,14160,14284,14313,15422,16175,16600,16664,16675,16678,16679,16680,16681,16688,16769,17918,18590,18988,19207,20423,20754,20861,20863,21808,21818,22061,22409,22410,53622,55948,58208,64818,64929,66042,67855,70810,70843,72383,74127,74591,80859,93735,93746,109052,110308,171168,214922,223915,223917,228357,232077,239673,386463,406219,408196,433016,433091,494504,545975,10012…	Barx2,Runx3,Celsr1,Dlx3,Edar,Lgr5,Fosl2,Fst,Hoxc13,Il1a,Klf4,Krt14,Krt27,Krt1,Krt86,Krt84,Krt2,Krt6b,Dsg4,Myo5a,Pdgfa,Pou2f3,Ptch2,Shh,Sprr1b,Stfa1,Stfa3,Tgfb2,Tgm3,Trp63,Wnt10a,Wnt10b,Krt85,Sfn,Bcl11b,Krt81,Scel,Sostdc1,Asprv1,Krt25,Krt28,Cnfn,Krt80,Abca12,Nfkbiz,Wnt16,Gprc5d,Krt75,Krt5,Acer1,Slc39a2,Krt73,Krt79,Lrp4,Foxi3,Krt90,Cdsn,Krt87,Csta3,Cstdc4,Pnpla1,Apcdd1,Cers3,Krt83	64/310
1_Member	GO Biological Processes	GO:0009913	epidermal cell differentiation	-28.2422	-24.4575	12159,13047,13393,14284,14632,16175,16450,16600,16664,16678,16679,16680,16681,16688,16769,18988,19206,19207,20754,20861,20863,21818,22061,53622,55948,58208,64818,64929,72383,73750,74127,74591,80859,93735,93746,109052,110308,214922,223915,223917,232077,239673,270893,386463,406219,408196,433016,433091,545975,100126226	Bmp4,Cux1,Dlx3,Fosl2,Gli1,Il1a,Jag2,Klf4,Krt14,Krt1,Krt86,Krt84,Krt2,Krt6b,Dsg4,Pou2f3,Ptch1,Ptch2,Sprr1b,Stfa1,Stfa3,Tgm3,Trp63,Krt85,Sfn,Bcl11b,Krt81,Scel,Cnfn,Whrn,Krt80,Abca12,Nfkbiz,Wnt16,Gprc5d,Krt75,Krt5,Slc39a2,Krt73,Krt79,Foxi3,Krt90,Tmem132e,Cdsn,Krt87,Csta3,Cstdc4,Pnpla1,Cers3,Krt83	50/212
1_Member	GO Biological Processes	GO:0030216	keratinocyte differentiation	-25.8182	-22.1584	14284,16175,16664,16678,16679,16680,16681,16688,16769,18988,20754,20861,20863,21818,22061,53622,55948,58208,64818,64929,72383,74127,74591,80859,93735,93746,109052,110308,214922,223915,223917,239673,386463,406219,408196,433016,433091,545975,100126226	Fosl2,Il1a,Krt14,Krt1,Krt86,Krt84,Krt2,Krt6b,Dsg4,Pou2f3,Sprr1b,Stfa1,Stfa3,Tgm3,Trp63,Krt85,Sfn,Bcl11b,Krt81,Scel,Cnfn,Krt80,Abca12,Nfkbiz,Wnt16,Gprc5d,Krt75,Krt5,Slc39a2,Krt73,Krt79,Krt90,Cdsn,Krt87,Csta3,Cstdc4,Pnpla1,Cers3,Krt83	39/134
1_Member	Reactome Gene Sets	R-MMU-6809371	Formation of the cornified envelope	-21.1577	-17.5948	16660,16664,16673,16675,16678,16679,16680,16681,16769,20863,53617,64818,68668,70810,70843,71888,74127,99681,109052,110308,223915,223917,259277,317653,386463,433180,626834,100126226	Krt31,Krt14,Krt36,Krt27,Krt1,Krt86,Krt84,Krt2,Dsg4,Stfa3,Krt35,Krt81,Klk5,Krt25,Krt28,Krt33a,Krt80,Tchh,Krt75,Krt5,Krt73,Krt79,Klk8,Klk14,Cdsn,Spink6,Klk13,Krt83	28/80
1_Member	GO Biological Processes	GO:0030855	epithelial cell differentiation	-20.9838	-17.5001	12142,12156,12159,12161,12162,12571,12606,13047,13393,14284,14313,14632,15894,15901,16175,16450,16542,16600,16660,16664,16673,16675,16678,16679,16680,16681,16688,16769,17260,18613,18988,19206,19207,20754,20855,20861,20863,21808,21818,21846,22061,22410,53617,53622,55948,58208,64818,64929,66042,70810,70843,71888,72383,73750,74127,74591,80859,93735,93746,109052,110308,214922,223915,223917,232077,239…	Prdm1,Bmp2,Bmp4,Bmp6,Bmp7,Cdk6,Cebpa,Cux1,Dlx3,Fosl2,Fst,Gli1,Icam1,Id1,Il1a,Jag2,Kdr,Klf4,Krt31,Krt14,Krt36,Krt27,Krt1,Krt86,Krt84,Krt2,Krt6b,Dsg4,Mef2c,Pecam1,Pou2f3,Ptch1,Ptch2,Sprr1b,Stc1,Stfa1,Stfa3,Tgfb2,Tgm3,Tie1,Trp63,Wnt10b,Krt35,Krt85,Sfn,Bcl11b,Krt81,Scel,Sostdc1,Krt25,Krt28,Krt33a,Cnfn,Whrn,Krt80,Abca12,Nfkbiz,Wnt16,Gprc5d,Krt75,Krt5,Slc39a2,Krt73,Krt79,Foxi3,Krt90,Tmem132e,Zfp703,Cds…	75/654
1_Member	GO Biological Processes	GO:0045109	intermediate filament organization	-19.397	-16.0382	16660,16664,16673,16675,16678,16679,16680,16681,16688,20423,53617,53622,64818,70810,70843,71888,74127,99681,109052,110308,223650,223915,223917,239673,406219,100126226	Krt31,Krt14,Krt36,Krt27,Krt1,Krt86,Krt84,Krt2,Krt6b,Shh,Krt35,Krt85,Krt81,Krt25,Krt28,Krt33a,Krt80,Tchh,Krt75,Krt5,Eppk1,Krt73,Krt79,Krt90,Krt87,Krt83	26/76
1_Member	GO Biological Processes	GO:0031424	keratinization	-18.7263	-15.4186	16175,16678,16679,16680,16681,16688,20754,21818,53622,55948,64818,72383,74127,74591,93746,109052,110308,223915,223917,239673,406219,545975,100126226	Il1a,Krt1,Krt86,Krt84,Krt2,Krt6b,Sprr1b,Tgm3,Krt85,Sfn,Krt81,Cnfn,Krt80,Abca12,Gprc5d,Krt75,Krt5,Krt73,Krt79,Krt90,Krt87,Cers3,Krt83	23/59
1_Member	GO Biological Processes	GO:0045104	intermediate filament cytoskeleton organization	-16.6605	-13.5126	16660,16664,16673,16675,16678,16679,16680,16681,16688,20423,53617,53622,64818,70810,70843,71888,74127,99681,109052,110308,223650,223915,223917,239673,406219,100126226	Krt31,Krt14,Krt36,Krt27,Krt1,Krt86,Krt84,Krt2,Krt6b,Shh,Krt35,Krt85,Krt81,Krt25,Krt28,Krt33a,Krt80,Tchh,Krt75,Krt5,Eppk1,Krt73,Krt79,Krt90,Krt87,Krt83	26/95
1_Member	GO Biological Processes	GO:0045103	intermediate filament-based process	-16.5366	-13.4209	16660,16664,16673,16675,16678,16679,16680,16681,16688,20423,53617,53622,64818,70810,70843,71888,74127,99681,109052,110308,223650,223915,223917,239673,406219,100126226	Krt31,Krt14,Krt36,Krt27,Krt1,Krt86,Krt84,Krt2,Krt6b,Shh,Krt35,Krt85,Krt81,Krt25,Krt28,Krt33a,Krt80,Tchh,Krt75,Krt5,Eppk1,Krt73,Krt79,Krt90,Krt87,Krt83	26/96
1_Member	Reactome Gene Sets	R-MMU-6805567	Keratinization	-14.3834	-11.5017	16660,16664,16673,16675,16678,16679,16680,16681,16703,16769,20863,53617,64818,68668,70810,70843,71888,74127,99681,109052,110308,223915,223917,259277,317653,386463,433180,626834,100126226	Krt31,Krt14,Krt36,Krt27,Krt1,Krt86,Krt84,Krt2,Krtap8-1,Dsg4,Stfa3,Krt35,Krt81,Klk5,Krt25,Krt28,Krt33a,Krt80,Tchh,Krt75,Krt5,Krt73,Krt79,Klk8,Klk14,Cdsn,Spink6,Klk13,Krt83	29/147
1_Member	Reactome Gene Sets	R-MMU-1266738	Developmental Biology	-9.65441	-7.14074	11876,12606,13642,16660,16664,16673,16675,16678,16679,16680,16681,16703,16769,17260,17395,19264,19713,20863,22152,22177,22186,53617,53972,64818,68668,70810,70843,71888,74127,99681,109052,110308,223881,223915,223917,246316,259277,317653,384783,386463,433180,626834,100126226	Artn,Cebpa,Efnb2,Krt31,Krt14,Krt36,Krt27,Krt1,Krt86,Krt84,Krt2,Krtap8-1,Dsg4,Mef2c,Mmp9,Ptprc,Ret,Stfa3,Tubb3,Tyrobp,Uba52,Krt35,Ngef,Krt81,Klk5,Krt25,Krt28,Krt33a,Krt80,Tchh,Krt75,Krt5,Rnd1,Krt73,Krt79,Lgi2,Klk8,Klk14,Irs2,Cdsn,Spink6,Klk13,Krt83	43/447
1_Member	GO Biological Processes	GO:0097435	supramolecular fiber organization	-6.3208	-4.24646	12491,12721,12795,16660,16664,16673,16675,16678,16679,16680,16681,16688,17300,17918,19200,20319,20393,20423,21808,53617,53622,56370,63873,64818,67573,70810,70843,71888,74103,74127,78317,99681,109052,110308,210719,223650,223881,223915,223917,239673,386463,406219,100126226	Cd36,Coro1a,Plk3,Krt31,Krt14,Krt36,Krt27,Krt1,Krt86,Krt84,Krt2,Krt6b,Foxc1,Myo5a,Pstpip1,Sfrp2,Sgk1,Shh,Tgfb2,Krt35,Krt85,Tagln3,Trpv4,Krt81,Loxl4,Krt25,Krt28,Krt33a,Nebl,Krt80,Ccdc88b,Tchh,Krt75,Krt5,Mkx,Eppk1,Rnd1,Krt73,Krt79,Krt90,Cdsn,Krt87,Krt83	43/581
2_Summary	GO Biological Processes	GO:0006954	inflammatory response	-20.0839	-16.6672	11690,12061,12062,12156,12161,12266,12505,12655,12768,12772,12773,13058,14283,14284,14289,14728,15439,15586,15894,16175,16176,16181,16190,16365,16409,16414,16803,17918,18024,18405,19200,19217,19696,20201,20202,20208,20209,20210,20302,20344,20963,21926,21929,21938,22062,22177,22361,24088,53791,54199,54448,54450,54483,56066,56312,56613,56644,66222,80859,83430,216799,229898,230738,241556,243910,2576…	Alox5ap,Bdkrb1,Bdkrb2,Bmp2,Bmp6,C3,Cd44,Chil3,Ccr1,Ccr2,Ccr4,Cybb,Fosl1,Fosl2,Fpr2,Lilrb4a,Hp,Hyal1,Icam1,Il1a,Il1b,Il1rn,Il4ra,Acod1,Itgam,Itgb2,Lbp,Myo5a,Nfe2l2,Orm1,Pstpip1,Ptger2,Rel,S100a8,S100a9,Saa1,Saa2,Saa3,Ccl3,Selp,Syk,Tnf,Tnfaip3,Tnfrsf1b,Trp73,Tyrobp,Vnn1,Tlr2,Tlr5,Ccrl2,Il36a,Il36rn,Mefv,Cxcl11,Nupr1,Rps6ka4,Clec7a,Serpinb1a,Nfkbiz,Il23a,Nlrp3,Gbp5,Zc3h12a,Tspan18,Nfkbid,Nod2,S100a7…	111/-
2_Member	GO Biological Processes	GO:0006954	inflammatory response	-20.0839	-16.6672	11690,12061,12062,12156,12161,12266,12505,12655,12768,12772,12773,13058,14283,14284,14289,14728,15439,15586,15894,16175,16176,16181,16190,16365,16409,16414,16803,17918,18024,18405,19200,19217,19696,20201,20202,20208,20209,20210,20302,20344,20963,21926,21929,21938,22062,22177,22361,24088,53791,54199,54448,54450,54483,56066,56312,56613,56644,66222,80859,83430,216799,229898,230738,241556,243910,2576…	Alox5ap,Bdkrb1,Bdkrb2,Bmp2,Bmp6,C3,Cd44,Chil3,Ccr1,Ccr2,Ccr4,Cybb,Fosl1,Fosl2,Fpr2,Lilrb4a,Hp,Hyal1,Icam1,Il1a,Il1b,Il1rn,Il4ra,Acod1,Itgam,Itgb2,Lbp,Myo5a,Nfe2l2,Orm1,Pstpip1,Ptger2,Rel,S100a8,S100a9,Saa1,Saa2,Saa3,Ccl3,Selp,Syk,Tnf,Tnfaip3,Tnfrsf1b,Trp73,Tyrobp,Vnn1,Tlr2,Tlr5,Ccrl2,Il36a,Il36rn,Mefv,Cxcl11,Nupr1,Rps6ka4,Clec7a,Serpinb1a,Nfkbiz,Il23a,Nlrp3,Gbp5,Zc3h12a,Tspan18,Nfkbid,Nod2,S100a7a	67/552
2_Member	GO Biological Processes	GO:0001816	cytokine production	-7.52467	-5.284	11770,12399,12491,14284,14728,16175,16176,16803,18018,19217,19696,20963,21926,24088,26903,54448,54450,55991,58217,80859,108723,216799,225825,257632,381493	Fabp4,Runx3,Cd36,Fosl2,Lilrb4a,Il1a,Il1b,Lbp,Nfatc1,Ptger2,Rel,Syk,Tnf,Tlr2,Dysf,Il36a,Il36rn,Panx1,Trem1,Nfkbiz,Card11,Nlrp3,Cd226,Nod2,S100a7a	25/213
2_Member	GO Biological Processes	GO:0001818	negative regulation of cytokine production	-5.85964	-3.8673	14114,14727,14728,16365,16600,16803,19073,19264,19696,21808,21926,21929,21946,22177,24088,54450,54483,60533,66214,66222,74048,81799,83430,93695,216799,230738,257632,434215	Fbln1,Lilrb4b,Lilrb4a,Acod1,Klf4,Lbp,Srgn,Ptprc,Rel,Tgfb2,Tnf,Tnfaip3,Pglyrp1,Tyrobp,Tlr2,Il36rn,Mefv,Cd274,Rgcc,Serpinb1a,Vsir,C1qtnf3,Il23a,Gpnmb,Nlrp3,Zc3h12a,Nod2,Lrrc32	28/313
2_Member	GO Biological Processes	GO:0032496	response to lipopolysaccharide	-5.0601	-3.18026	12061,12491,12519,14284,14728,16175,16176,16365,16803,17260,18035,19217,20201,20202,21926,21929,21938,54448,54450,56066,60533,66102,66107,66166,80859,214855,216799,229898,230738,257632	Bdkrb1,Cd36,Cd80,Fosl2,Lilrb4a,Il1a,Il1b,Acod1,Lbp,Mef2c,Nfkbia,Ptger2,S100a8,S100a9,Tnf,Tnfaip3,Tnfrsf1b,Il36a,Il36rn,Cxcl11,Cd274,Cxcl16,Wfdc21,S100a14,Nfkbiz,Arid5a,Nlrp3,Gbp5,Zc3h12a,Nod2	30/383
2_Member	GO Biological Processes	GO:0002237	response to molecule of bacterial origin	-5.05084	-3.17459	12061,12491,12519,14284,14728,16175,16176,16365,16803,17260,18035,19217,20201,20202,21926,21929,21938,24088,54448,54450,56066,60533,66102,66107,66166,80859,214855,216799,229898,230738,257632	Bdkrb1,Cd36,Cd80,Fosl2,Lilrb4a,Il1a,Il1b,Acod1,Lbp,Mef2c,Nfkbia,Ptger2,S100a8,S100a9,Tnf,Tnfaip3,Tnfrsf1b,Tlr2,Il36a,Il36rn,Cxcl11,Cd274,Cxcl16,Wfdc21,S100a14,Nfkbiz,Arid5a,Nlrp3,Gbp5,Zc3h12a,Nod2	31/403
2_Member	GO Biological Processes	GO:0071216	cellular response to biotic stimulus	-5.00041	-3.133	12491,12519,14728,16175,16176,16365,16803,17260,18035,20963,21926,21929,21938,24088,54448,54450,56066,56644,60533,66102,80859,214855,216799,229898,230738,257632,327957	Cd36,Cd80,Lilrb4a,Il1a,Il1b,Acod1,Lbp,Mef2c,Nfkbia,Syk,Tnf,Tnfaip3,Tnfrsf1b,Tlr2,Il36a,Il36rn,Cxcl11,Clec7a,Cd274,Cxcl16,Nfkbiz,Arid5a,Nlrp3,Gbp5,Zc3h12a,Nod2,Scimp	27/328
2_Member	GO Biological Processes	GO:0071396	cellular response to lipid	-4.41552	-2.65197	11826,12159,12491,12519,13082,13123,14728,16175,16176,16365,16803,17260,18035,18712,19206,19217,19713,20278,20393,20963,21926,21929,21938,22337,54448,54450,56066,60533,66102,75577,80859,105349,214855,216799,229898,230738,257632,269997,353310	Aqp1,Bmp4,Cd36,Cd80,Cyp26a1,Cyp7b1,Lilrb4a,Il1a,Il1b,Acod1,Lbp,Mef2c,Nfkbia,Pim1,Ptch1,Ptger2,Ret,Scnn1g,Sgk1,Syk,Tnf,Tnfaip3,Tnfrsf1b,Vdr,Il36a,Il36rn,Cxcl11,Cd274,Cxcl16,Dynap,Nfkbiz,Akr1c18,Arid5a,Nlrp3,Gbp5,Zc3h12a,Nod2,Zfp747,Zfp703	39/604
2_Member	GO Biological Processes	GO:0071219	cellular response to molecule of bacterial origin	-4.29114	-2.54648	12491,12519,14728,16175,16176,16365,16803,17260,18035,21926,21929,21938,24088,54448,54450,56066,60533,66102,80859,214855,216799,229898,230738,257632	Cd36,Cd80,Lilrb4a,Il1a,Il1b,Acod1,Lbp,Mef2c,Nfkbia,Tnf,Tnfaip3,Tnfrsf1b,Tlr2,Il36a,Il36rn,Cxcl11,Cd274,Cxcl16,Nfkbiz,Arid5a,Nlrp3,Gbp5,Zc3h12a,Nod2	24/301
2_Member	GO Biological Processes	GO:0071222	cellular response to lipopolysaccharide	-4.07979	-2.38393	12491,12519,14728,16175,16176,16365,16803,17260,18035,21926,21929,21938,54448,54450,56066,60533,66102,80859,214855,216799,229898,230738,257632	Cd36,Cd80,Lilrb4a,Il1a,Il1b,Acod1,Lbp,Mef2c,Nfkbia,Tnf,Tnfaip3,Tnfrsf1b,Il36a,Il36rn,Cxcl11,Cd274,Cxcl16,Nfkbiz,Arid5a,Nlrp3,Gbp5,Zc3h12a,Nod2	23/291
3_Summary	GO Biological Processes	GO:0022407	regulation of cell-cell adhesion	-18.0787	-14.8169	11898,12156,12159,12161,12162,12399,12505,12507,12519,12721,12772,13642,13655,14348,14727,14728,14960,15507,15894,16175,16176,16181,16186,16190,16414,16600,16818,18106,18950,19264,20344,20423,20963,21926,21929,21950,22361,22410,24099,26971,50930,60533,63873,66214,67122,74048,74591,78317,80859,83430,93695,108723,140474,216799,230738,233067,243910,353310,386463,434215,100038947,100039795,12142,1218…	Ass1,Bmp2,Bmp4,Bmp6,Bmp7,Runx3,Cd44,Cd5,Cd80,Coro1a,Ccr2,Efnb2,Egr3,Fut9,Lilrb4b,Lilrb4a,H2-Aa,Hspb1,Icam1,Il1a,Il1b,Il1rn,Il2rg,Il4ra,Itgb2,Klf4,Lck,Cd244a,Pnp,Ptprc,Selp,Shh,Syk,Tnf,Tnfaip3,Tnfsf9,Vnn1,Wnt10b,Tnfsf13b,Pla2g2f,Tnfsf14,Cd274,Trpv4,Rgcc,Nrarp,Vsir,Abca12,Ccdc88b,Nfkbiz,Il23a,Gpnmb,Card11,Muc4,Nlrp3,Zc3h12a,Lrfn3,Nfkbid,Zfp703,Cdsn,Lrrc32,Sirpb1c,Ildr2,Prdm1,Bst1,Cebpa,Ctsc,Fgr,Lbp…	144/-
3_Member	GO Biological Processes	GO:0022407	regulation of cell-cell adhesion	-18.0787	-14.8169	11898,12156,12159,12161,12162,12399,12505,12507,12519,12721,12772,13642,13655,14348,14727,14728,14960,15507,15894,16175,16176,16181,16186,16190,16414,16600,16818,18106,18950,19264,20344,20423,20963,21926,21929,21950,22361,22410,24099,26971,50930,60533,63873,66214,67122,74048,74591,78317,80859,83430,93695,108723,140474,216799,230738,233067,243910,353310,386463,434215,100038947,100039795	Ass1,Bmp2,Bmp4,Bmp6,Bmp7,Runx3,Cd44,Cd5,Cd80,Coro1a,Ccr2,Efnb2,Egr3,Fut9,Lilrb4b,Lilrb4a,H2-Aa,Hspb1,Icam1,Il1a,Il1b,Il1rn,Il2rg,Il4ra,Itgb2,Klf4,Lck,Cd244a,Pnp,Ptprc,Selp,Shh,Syk,Tnf,Tnfaip3,Tnfsf9,Vnn1,Wnt10b,Tnfsf13b,Pla2g2f,Tnfsf14,Cd274,Trpv4,Rgcc,Nrarp,Vsir,Abca12,Ccdc88b,Nfkbiz,Il23a,Gpnmb,Card11,Muc4,Nlrp3,Zc3h12a,Lrfn3,Nfkbid,Zfp703,Cdsn,Lrrc32,Sirpb1c,Ildr2	62/523
3_Member	GO Biological Processes	GO:0002694	regulation of leukocyte activation	-17.8323	-14.6118	12142,12159,12182,12399,12505,12507,12519,12606,12721,12772,13032,13642,13655,14191,14727,14728,14960,15507,16175,16176,16186,16190,16803,16818,17260,17474,18003,18106,18950,19264,19267,20423,20963,21414,21926,21929,21938,21946,21950,22177,22361,22410,24099,26971,50930,56644,56708,60533,66725,67122,67742,74048,78317,80859,83430,93695,108723,109594,216799,225825,230738,243910,246746,257632,384783,…	Prdm1,Bmp4,Bst1,Runx3,Cd44,Cd5,Cd80,Cebpa,Coro1a,Ccr2,Ctsc,Efnb2,Egr3,Fgr,Lilrb4b,Lilrb4a,H2-Aa,Hspb1,Il1a,Il1b,Il2rg,Il4ra,Lbp,Lck,Mef2c,Clec4d,Nedd9,Cd244a,Pnp,Ptprc,Ptpre,Shh,Syk,Tcf7,Tnf,Tnfaip3,Tnfrsf1b,Pglyrp1,Tnfsf9,Tyrobp,Vnn1,Wnt10b,Tnfsf13b,Pla2g2f,Tnfsf14,Clec7a,Clcf1,Cd274,Lrrk2,Nrarp,Samsn1,Vsir,Ccdc88b,Nfkbiz,Il23a,Gpnmb,Card11,Lmo1,Nlrp3,Cd226,Zc3h12a,Nfkbid,Cd300lf,Nod2,Irs2,Lrrc3…	68/624
3_Member	GO Biological Processes	GO:0050865	regulation of cell activation	-17.6265	-14.4438	12142,12159,12182,12399,12505,12507,12519,12606,12721,12772,13032,13642,13655,14191,14727,14728,14960,15507,16175,16176,16186,16190,16803,16818,17260,17474,18003,18106,18590,18950,19264,19267,20344,20423,20963,21414,21926,21929,21938,21946,21950,22177,22361,22410,24099,26971,50930,56193,56644,56708,60533,66725,67122,67742,74048,78317,80859,83430,93695,108723,109594,216799,225825,230738,243910,246…	Prdm1,Bmp4,Bst1,Runx3,Cd44,Cd5,Cd80,Cebpa,Coro1a,Ccr2,Ctsc,Efnb2,Egr3,Fgr,Lilrb4b,Lilrb4a,H2-Aa,Hspb1,Il1a,Il1b,Il2rg,Il4ra,Lbp,Lck,Mef2c,Clec4d,Nedd9,Cd244a,Pdgfa,Pnp,Ptprc,Ptpre,Selp,Shh,Syk,Tcf7,Tnf,Tnfaip3,Tnfrsf1b,Pglyrp1,Tnfsf9,Tyrobp,Vnn1,Wnt10b,Tnfsf13b,Pla2g2f,Tnfsf14,Plek,Clec7a,Clcf1,Cd274,Lrrk2,Nrarp,Samsn1,Vsir,Ccdc88b,Nfkbiz,Il23a,Gpnmb,Card11,Lmo1,Nlrp3,Cd226,Zc3h12a,Nfkbid,Cd300lf…	71/679
3_Member	GO Biological Processes	GO:1903037	regulation of leukocyte cell-cell adhesion	-15.4484	-12.3907	11898,12159,12399,12505,12507,12519,12721,12772,13642,13655,14348,14727,14728,14960,15507,15894,16175,16176,16186,16190,16414,16600,16818,18106,18950,19264,20344,20423,20963,21926,21950,22361,22410,24099,26971,50930,60533,67122,74048,78317,80859,83430,93695,108723,216799,230738,243910,434215,100038947,100039795	Ass1,Bmp4,Runx3,Cd44,Cd5,Cd80,Coro1a,Ccr2,Efnb2,Egr3,Fut9,Lilrb4b,Lilrb4a,H2-Aa,Hspb1,Icam1,Il1a,Il1b,Il2rg,Il4ra,Itgb2,Klf4,Lck,Cd244a,Pnp,Ptprc,Selp,Shh,Syk,Tnf,Tnfsf9,Vnn1,Wnt10b,Tnfsf13b,Pla2g2f,Tnfsf14,Cd274,Nrarp,Vsir,Ccdc88b,Nfkbiz,Il23a,Gpnmb,Card11,Nlrp3,Zc3h12a,Nfkbid,Lrrc32,Sirpb1c,Ildr2	50/403
3_Member	GO Biological Processes	GO:0051249	regulation of lymphocyte activation	-15.2587	-12.2273	12142,12159,12182,12399,12505,12507,12519,12721,12772,13642,13655,14191,14727,14728,14960,15507,16175,16176,16186,16190,16818,17260,18003,18106,18950,19264,20423,20963,21414,21929,21938,21946,21950,22177,22361,22410,24099,26971,50930,56644,56708,60533,67122,67742,74048,78317,80859,83430,93695,108723,109594,216799,230738,243910,257632,384783,434215,100038947,100039795	Prdm1,Bmp4,Bst1,Runx3,Cd44,Cd5,Cd80,Coro1a,Ccr2,Efnb2,Egr3,Fgr,Lilrb4b,Lilrb4a,H2-Aa,Hspb1,Il1a,Il1b,Il2rg,Il4ra,Lck,Mef2c,Nedd9,Cd244a,Pnp,Ptprc,Shh,Syk,Tcf7,Tnfaip3,Tnfrsf1b,Pglyrp1,Tnfsf9,Tyrobp,Vnn1,Wnt10b,Tnfsf13b,Pla2g2f,Tnfsf14,Clec7a,Clcf1,Cd274,Nrarp,Samsn1,Vsir,Ccdc88b,Nfkbiz,Il23a,Gpnmb,Card11,Lmo1,Nlrp3,Zc3h12a,Nfkbid,Nod2,Irs2,Lrrc32,Sirpb1c,Ildr2	59/548
3_Member	GO Biological Processes	GO:0050867	positive regulation of cell activation	-14.7588	-11.8394	12182,12399,12507,12519,12606,12721,12772,13032,13642,13655,14727,14728,14960,16175,16176,16186,16190,16803,16818,17260,17474,18106,18950,19264,20344,20423,20963,21926,21950,22177,22361,22410,24099,50930,56193,56644,56708,60533,66725,74048,78317,80859,83430,108723,216799,225825,243910,257632,384783,100038947	Bst1,Runx3,Cd5,Cd80,Cebpa,Coro1a,Ccr2,Ctsc,Efnb2,Egr3,Lilrb4b,Lilrb4a,H2-Aa,Il1a,Il1b,Il2rg,Il4ra,Lbp,Lck,Mef2c,Clec4d,Cd244a,Pnp,Ptprc,Selp,Shh,Syk,Tnf,Tnfsf9,Tyrobp,Vnn1,Wnt10b,Tnfsf13b,Tnfsf14,Plek,Clec7a,Clcf1,Cd274,Lrrk2,Vsir,Ccdc88b,Nfkbiz,Il23a,Card11,Nlrp3,Cd226,Nfkbid,Nod2,Irs2,Sirpb1c	50/419
3_Member	GO Biological Processes	GO:0002696	positive regulation of leukocyte activation	-14.4934	-11.5932	12182,12399,12507,12519,12606,12721,12772,13032,13642,13655,14727,14728,14960,16175,16176,16186,16190,16803,16818,17260,17474,18106,18950,19264,20423,20963,21926,21950,22177,22361,22410,24099,50930,56644,56708,60533,66725,74048,78317,80859,83430,108723,216799,225825,243910,257632,384783,100038947	Bst1,Runx3,Cd5,Cd80,Cebpa,Coro1a,Ccr2,Ctsc,Efnb2,Egr3,Lilrb4b,Lilrb4a,H2-Aa,Il1a,Il1b,Il2rg,Il4ra,Lbp,Lck,Mef2c,Clec4d,Cd244a,Pnp,Ptprc,Shh,Syk,Tnf,Tnfsf9,Tyrobp,Vnn1,Wnt10b,Tnfsf13b,Tnfsf14,Clec7a,Clcf1,Cd274,Lrrk2,Vsir,Ccdc88b,Nfkbiz,Il23a,Card11,Nlrp3,Cd226,Nfkbid,Nod2,Irs2,Sirpb1c	48/395
3_Member	GO Biological Processes	GO:0050863	regulation of T cell activation	-13.4019	-10.5694	12142,12159,12399,12505,12507,12519,12721,12772,13642,13655,14727,14728,14960,15507,16175,16176,16186,16190,16818,18106,18950,19264,20423,20963,21414,21938,21950,22361,22410,24099,26971,50930,60533,67122,74048,78317,80859,83430,93695,108723,109594,216799,230738,243910,434215,100038947,100039795	Prdm1,Bmp4,Runx3,Cd44,Cd5,Cd80,Coro1a,Ccr2,Efnb2,Egr3,Lilrb4b,Lilrb4a,H2-Aa,Hspb1,Il1a,Il1b,Il2rg,Il4ra,Lck,Cd244a,Pnp,Ptprc,Shh,Syk,Tcf7,Tnfrsf1b,Tnfsf9,Vnn1,Wnt10b,Tnfsf13b,Pla2g2f,Tnfsf14,Cd274,Nrarp,Vsir,Ccdc88b,Nfkbiz,Il23a,Gpnmb,Card11,Lmo1,Nlrp3,Zc3h12a,Nfkbid,Lrrc32,Sirpb1c,Ildr2	47/406
3_Member	GO Biological Processes	GO:0045785	positive regulation of cell adhesion	-13.3999	-10.5694	12162,12399,12491,12505,12507,12519,12554,12571,12721,12772,13642,13655,14114,14343,14727,14728,14960,15586,15894,16175,16176,16186,16190,16414,16542,16818,18003,18106,18950,19264,19713,20194,20344,20423,20963,21808,21926,21950,22361,22410,24099,26903,50930,58217,60533,74048,74199,78317,80859,83430,94214,108723,216799,243910,100038947	Bmp7,Runx3,Cd36,Cd44,Cd5,Cd80,Cdh13,Cdk6,Coro1a,Ccr2,Efnb2,Egr3,Fbln1,Fut1,Lilrb4b,Lilrb4a,H2-Aa,Hyal1,Icam1,Il1a,Il1b,Il2rg,Il4ra,Itgb2,Kdr,Lck,Nedd9,Cd244a,Pnp,Ptprc,Ret,S100a10,Selp,Shh,Syk,Tgfb2,Tnf,Tnfsf9,Vnn1,Wnt10b,Tnfsf13b,Dysf,Tnfsf14,Trem1,Cd274,Vsir,Vit,Ccdc88b,Nfkbiz,Il23a,Spock2,Card11,Nlrp3,Nfkbid,Sirpb1c	55/535
3_Member	GO Biological Processes	GO:1903706	regulation of hemopoiesis	-13.3347	-10.5201	12142,12159,12399,12505,12571,12606,12768,12772,12986,13655,14727,14728,14960,15507,16186,16190,16409,16818,16909,17260,18003,18035,18383,18725,18733,18950,19264,20302,20423,20963,21414,21926,21946,21950,22177,22361,22410,65963,67122,68027,74048,74614,80859,83430,108723,216799,227326,229323,230738,243910	Prdm1,Bmp4,Runx3,Cd44,Cdk6,Cebpa,Ccr1,Ccr2,Csf3r,Egr3,Lilrb4b,Lilrb4a,H2-Aa,Hspb1,Il2rg,Il4ra,Itgam,Lck,Lmo2,Mef2c,Nedd9,Nfkbia,Tnfrsf11b,Pira2,Pirb,Pnp,Ptprc,Ccl3,Shh,Syk,Tcf7,Tnf,Pglyrp1,Tnfsf9,Tyrobp,Vnn1,Wnt10b,Tmem176b,Nrarp,Tmem178,Vsir,Ocstamp,Nfkbiz,Il23a,Card11,Nlrp3,Gpr55,Gpr171,Zc3h12a,Nfkbid	50/455
3_Member	GO Biological Processes	GO:1902105	regulation of leukocyte differentiation	-13.116	-10.3165	12142,12159,12399,12505,12571,12768,12772,13655,14727,14728,14960,15507,16186,16190,16409,16818,18003,18383,18725,18733,18950,19264,20302,20423,20963,21414,21926,21946,21950,22177,22361,22410,65963,67122,68027,74048,74614,80859,83430,108723,216799,227326,230738,243910	Prdm1,Bmp4,Runx3,Cd44,Cdk6,Ccr1,Ccr2,Egr3,Lilrb4b,Lilrb4a,H2-Aa,Hspb1,Il2rg,Il4ra,Itgam,Lck,Nedd9,Tnfrsf11b,Pira2,Pirb,Pnp,Ptprc,Ccl3,Shh,Syk,Tcf7,Tnf,Pglyrp1,Tnfsf9,Tyrobp,Vnn1,Wnt10b,Tmem176b,Nrarp,Tmem178,Vsir,Ocstamp,Nfkbiz,Il23a,Card11,Nlrp3,Gpr55,Zc3h12a,Nfkbid	44/367
3_Member	GO Biological Processes	GO:1903039	positive regulation of leukocyte cell-cell adhesion	-13.0032	-10.2185	12399,12505,12507,12519,12721,12772,13642,13655,14727,14728,14960,15894,16175,16176,16186,16190,16414,16818,18106,18950,19264,20344,20423,20963,21926,21950,22361,22410,24099,50930,60533,74048,78317,80859,83430,108723,216799,243910,100038947	Runx3,Cd44,Cd5,Cd80,Coro1a,Ccr2,Efnb2,Egr3,Lilrb4b,Lilrb4a,H2-Aa,Icam1,Il1a,Il1b,Il2rg,Il4ra,Itgb2,Lck,Cd244a,Pnp,Ptprc,Selp,Shh,Syk,Tnf,Tnfsf9,Vnn1,Wnt10b,Tnfsf13b,Tnfsf14,Cd274,Vsir,Ccdc88b,Nfkbiz,Il23a,Card11,Nlrp3,Nfkbid,Sirpb1c	39/296
3_Member	GO Biological Processes	GO:0051251	positive regulation of lymphocyte activation	-11.6036	-8.92148	12182,12399,12507,12519,12721,12772,13642,13655,14727,14728,14960,16175,16176,16186,16190,16818,17260,18106,18950,19264,20423,20963,21950,22177,22361,22410,24099,50930,56644,56708,60533,74048,78317,80859,83430,108723,216799,243910,257632,384783,100038947	Bst1,Runx3,Cd5,Cd80,Coro1a,Ccr2,Efnb2,Egr3,Lilrb4b,Lilrb4a,H2-Aa,Il1a,Il1b,Il2rg,Il4ra,Lck,Mef2c,Cd244a,Pnp,Ptprc,Shh,Syk,Tnfsf9,Tyrobp,Vnn1,Wnt10b,Tnfsf13b,Tnfsf14,Clec7a,Clcf1,Cd274,Vsir,Ccdc88b,Nfkbiz,Il23a,Card11,Nlrp3,Nfkbid,Nod2,Irs2,Sirpb1c	41/358
3_Member	GO Biological Processes	GO:0022409	positive regulation of cell-cell adhesion	-11.4239	-8.7748	12162,12399,12505,12507,12519,12721,12772,13642,13655,14727,14728,14960,15894,16175,16176,16186,16190,16414,16818,18106,18950,19264,20344,20423,20963,21926,21950,22361,22410,24099,50930,60533,74048,78317,80859,83430,108723,216799,243910,100038947	Bmp7,Runx3,Cd44,Cd5,Cd80,Coro1a,Ccr2,Efnb2,Egr3,Lilrb4b,Lilrb4a,H2-Aa,Icam1,Il1a,Il1b,Il2rg,Il4ra,Itgb2,Lck,Cd244a,Pnp,Ptprc,Selp,Shh,Syk,Tnf,Tnfsf9,Vnn1,Wnt10b,Tnfsf13b,Tnfsf14,Cd274,Vsir,Ccdc88b,Nfkbiz,Il23a,Card11,Nlrp3,Nfkbid,Sirpb1c	40/347
3_Member	GO Biological Processes	GO:0045580	regulation of T cell differentiation	-11.3565	-8.71793	12142,12159,12399,12505,12772,13655,14727,14728,14960,15507,16186,16190,16818,18950,19264,20423,20963,21414,21950,22361,22410,67122,74048,80859,83430,108723,216799,230738,243910	Prdm1,Bmp4,Runx3,Cd44,Ccr2,Egr3,Lilrb4b,Lilrb4a,H2-Aa,Hspb1,Il2rg,Il4ra,Lck,Pnp,Ptprc,Shh,Syk,Tcf7,Tnfsf9,Vnn1,Wnt10b,Nrarp,Vsir,Nfkbiz,Il23a,Card11,Nlrp3,Zc3h12a,Nfkbid	29/191
3_Member	GO Biological Processes	GO:0050870	positive regulation of T cell activation	-10.8541	-8.23571	12399,12507,12519,12721,12772,13642,13655,14727,14728,14960,16175,16176,16186,16190,16818,18106,18950,19264,20423,20963,21950,22361,22410,24099,50930,60533,74048,78317,80859,83430,108723,216799,243910,100038947	Runx3,Cd5,Cd80,Coro1a,Ccr2,Efnb2,Egr3,Lilrb4b,Lilrb4a,H2-Aa,Il1a,Il1b,Il2rg,Il4ra,Lck,Cd244a,Pnp,Ptprc,Shh,Syk,Tnfsf9,Vnn1,Wnt10b,Tnfsf13b,Tnfsf14,Cd274,Vsir,Ccdc88b,Nfkbiz,Il23a,Card11,Nlrp3,Nfkbid,Sirpb1c	34/270
3_Member	GO Biological Processes	GO:0045619	regulation of lymphocyte differentiation	-10.269	-7.71472	12142,12159,12399,12505,12772,13655,14727,14728,14960,15507,16186,16190,16818,18950,19264,20423,20963,21414,21946,21950,22361,22410,67122,74048,80859,83430,108723,216799,230738,243910	Prdm1,Bmp4,Runx3,Cd44,Ccr2,Egr3,Lilrb4b,Lilrb4a,H2-Aa,Hspb1,Il2rg,Il4ra,Lck,Pnp,Ptprc,Shh,Syk,Tcf7,Pglyrp1,Tnfsf9,Vnn1,Wnt10b,Nrarp,Vsir,Nfkbiz,Il23a,Card11,Nlrp3,Zc3h12a,Nfkbid	30/225
3_Member	GO Biological Processes	GO:0070663	regulation of leukocyte proliferation	-9.93427	-7.39669	12159,12182,12505,12519,12721,12772,12983,12984,14727,14728,14960,16175,16176,17260,18106,18950,19264,20423,20963,21938,21950,22177,24099,26971,56708,60533,74048,74614,78317,83430,93695,108723,109594,384783,434215	Bmp4,Bst1,Cd44,Cd80,Coro1a,Ccr2,Csf2rb,Csf2rb2,Lilrb4b,Lilrb4a,H2-Aa,Il1a,Il1b,Mef2c,Cd244a,Pnp,Ptprc,Shh,Syk,Tnfrsf1b,Tnfsf9,Tyrobp,Tnfsf13b,Pla2g2f,Clcf1,Cd274,Vsir,Ocstamp,Ccdc88b,Il23a,Gpnmb,Card11,Lmo1,Irs2,Lrrc32	35/307
3_Member	GO Biological Processes	GO:0010720	positive regulation of cell development	-9.8689	-7.33944	12156,12159,12173,12399,12562,12768,12772,12904,13047,13190,13655,14025,14727,14728,14960,16176,16186,16190,16409,16542,16818,18003,18205,18755,18950,19264,19283,19713,20302,20393,20423,20963,21926,21938,21950,22062,22177,22361,22410,24001,24088,51791,56644,56708,74048,74614,80859,83430,216799,243910	Bmp2,Bmp4,Bnc1,Runx3,Cdh5,Ccr1,Ccr2,Crabp2,Cux1,Dct,Egr3,Bcl11a,Lilrb4b,Lilrb4a,H2-Aa,Il1b,Il2rg,Il4ra,Itgam,Kdr,Lck,Nedd9,Ntf3,Prkch,Pnp,Ptprc,Ptprz1,Ret,Ccl3,Sgk1,Shh,Syk,Tnf,Tnfrsf1b,Tnfsf9,Trp73,Tyrobp,Vnn1,Wnt10b,Tiam2,Tlr2,Rgs14,Clec7a,Clcf1,Vsir,Ocstamp,Nfkbiz,Il23a,Nlrp3,Nfkbid	50/564
3_Member	GO Biological Processes	GO:1902107	positive regulation of leukocyte differentiation	-9.3862	-6.8952	12399,12768,12772,13655,14727,14728,14960,16186,16190,16409,16818,18003,18950,19264,20302,20423,20963,21926,21950,22177,22361,22410,74048,74614,80859,83430,216799,243910	Runx3,Ccr1,Ccr2,Egr3,Lilrb4b,Lilrb4a,H2-Aa,Il2rg,Il4ra,Itgam,Lck,Nedd9,Pnp,Ptprc,Ccl3,Shh,Syk,Tnf,Tnfsf9,Tyrobp,Vnn1,Wnt10b,Vsir,Ocstamp,Nfkbiz,Il23a,Nlrp3,Nfkbid	28/215
3_Member	GO Biological Processes	GO:1903708	positive regulation of hemopoiesis	-9.3862	-6.8952	12399,12768,12772,13655,14727,14728,14960,16186,16190,16409,16818,18003,18950,19264,20302,20423,20963,21926,21950,22177,22361,22410,74048,74614,80859,83430,216799,243910	Runx3,Ccr1,Ccr2,Egr3,Lilrb4b,Lilrb4a,H2-Aa,Il2rg,Il4ra,Itgam,Lck,Nedd9,Pnp,Ptprc,Ccl3,Shh,Syk,Tnf,Tnfsf9,Tyrobp,Vnn1,Wnt10b,Vsir,Ocstamp,Nfkbiz,Il23a,Nlrp3,Nfkbid	28/215
3_Member	GO Biological Processes	GO:0045582	positive regulation of T cell differentiation	-9.22461	-6.76894	12399,12772,13655,14727,14728,14960,16186,16190,16818,18950,19264,20423,20963,21950,22361,22410,74048,80859,83430,216799,243910	Runx3,Ccr2,Egr3,Lilrb4b,Lilrb4a,H2-Aa,Il2rg,Il4ra,Lck,Pnp,Ptprc,Shh,Syk,Tnfsf9,Vnn1,Wnt10b,Vsir,Nfkbiz,Il23a,Nlrp3,Nfkbid	21/125
3_Member	GO Biological Processes	GO:0050670	regulation of lymphocyte proliferation	-9.16137	-6.71906	12159,12182,12505,12519,12721,12772,14727,14728,14960,16175,16176,17260,18106,18950,19264,20423,20963,21938,21950,22177,24099,26971,56708,60533,74048,78317,83430,93695,108723,109594,384783,434215	Bmp4,Bst1,Cd44,Cd80,Coro1a,Ccr2,Lilrb4b,Lilrb4a,H2-Aa,Il1a,Il1b,Mef2c,Cd244a,Pnp,Ptprc,Shh,Syk,Tnfrsf1b,Tnfsf9,Tyrobp,Tnfsf13b,Pla2g2f,Clcf1,Cd274,Vsir,Ccdc88b,Il23a,Gpnmb,Card11,Lmo1,Irs2,Lrrc32	32/280
3_Member	GO Biological Processes	GO:0032944	regulation of mononuclear cell proliferation	-9.00559	-6.58883	12159,12182,12505,12519,12721,12772,14727,14728,14960,16175,16176,17260,18106,18950,19264,20423,20963,21938,21950,22177,24099,26971,56708,60533,74048,78317,83430,93695,108723,109594,384783,434215	Bmp4,Bst1,Cd44,Cd80,Coro1a,Ccr2,Lilrb4b,Lilrb4a,H2-Aa,Il1a,Il1b,Mef2c,Cd244a,Pnp,Ptprc,Shh,Syk,Tnfrsf1b,Tnfsf9,Tyrobp,Tnfsf13b,Pla2g2f,Clcf1,Cd274,Vsir,Ccdc88b,Il23a,Gpnmb,Card11,Lmo1,Irs2,Lrrc32	32/284
3_Member	GO Biological Processes	GO:0046634	regulation of alpha-beta T cell activation	-8.76242	-6.36388	12142,12399,12505,12519,12772,14727,14728,16186,16190,18106,18950,19264,20423,20963,60533,74048,80859,83430,108723,216799,230738,243910	Prdm1,Runx3,Cd44,Cd80,Ccr2,Lilrb4b,Lilrb4a,Il2rg,Il4ra,Cd244a,Pnp,Ptprc,Shh,Syk,Cd274,Vsir,Nfkbiz,Il23a,Card11,Nlrp3,Zc3h12a,Nfkbid	22/145
3_Member	GO Biological Processes	GO:0042129	regulation of T cell proliferation	-8.45586	-6.10781	12159,12505,12519,12721,12772,14727,14728,14960,16175,16176,18106,18950,19264,20423,20963,21938,21950,24099,26971,60533,74048,78317,83430,93695,108723,109594,434215	Bmp4,Cd44,Cd80,Coro1a,Ccr2,Lilrb4b,Lilrb4a,H2-Aa,Il1a,Il1b,Cd244a,Pnp,Ptprc,Shh,Syk,Tnfrsf1b,Tnfsf9,Tnfsf13b,Pla2g2f,Cd274,Vsir,Ccdc88b,Il23a,Gpnmb,Card11,Lmo1,Lrrc32	27/221
3_Member	GO Biological Processes	GO:0045621	positive regulation of lymphocyte differentiation	-8.2448	-5.92247	12399,12772,13655,14727,14728,14960,16186,16190,16818,18950,19264,20423,20963,21950,22361,22410,74048,80859,83430,216799,243910	Runx3,Ccr2,Egr3,Lilrb4b,Lilrb4a,H2-Aa,Il2rg,Il4ra,Lck,Pnp,Ptprc,Shh,Syk,Tnfsf9,Vnn1,Wnt10b,Vsir,Nfkbiz,Il23a,Nlrp3,Nfkbid	21/141
3_Member	GO Biological Processes	GO:0046638	positive regulation of alpha-beta T cell differentiation	-8.00244	-5.69962	12399,12772,14727,14728,16186,16190,18950,20423,20963,80859,83430,216799,243910	Runx3,Ccr2,Lilrb4b,Lilrb4a,Il2rg,Il4ra,Pnp,Shh,Syk,Nfkbiz,Il23a,Nlrp3,Nfkbid	13/53
3_Member	GO Biological Processes	GO:0046637	regulation of alpha-beta T cell differentiation	-7.74728	-5.4722	12142,12399,12772,14727,14728,16186,16190,18950,20423,20963,80859,83430,216799,230738,243910	Prdm1,Runx3,Ccr2,Lilrb4b,Lilrb4a,Il2rg,Il4ra,Pnp,Shh,Syk,Nfkbiz,Il23a,Nlrp3,Zc3h12a,Nfkbid	15/76
3_Member	GO Biological Processes	GO:0046635	positive regulation of alpha-beta T cell activation	-7.66836	-5.40596	12399,12519,12772,14727,14728,16186,16190,18106,18950,19264,20423,20963,80859,83430,108723,216799,243910	Runx3,Cd80,Ccr2,Lilrb4b,Lilrb4a,Il2rg,Il4ra,Cd244a,Pnp,Ptprc,Shh,Syk,Nfkbiz,Il23a,Card11,Nlrp3,Nfkbid	17/100
3_Member	GO Biological Processes	GO:0002521	leukocyte differentiation	-7.33148	-5.11495	12156,12159,12393,12571,12606,14025,14284,16186,16190,16409,16450,16818,17260,17305,17474,18018,18733,18950,19152,19264,20423,20963,21414,21926,21929,21950,22177,22410,24088,24099,54485,56619,56708,58208,65963,67122,74614,80859,108723,243910,246746	Bmp2,Bmp4,Runx2,Cdk6,Cebpa,Bcl11a,Fosl2,Il2rg,Il4ra,Itgam,Jag2,Lck,Mef2c,Mfng,Clec4d,Nfatc1,Pirb,Pnp,Prtn3,Ptprc,Shh,Syk,Tcf7,Tnf,Tnfaip3,Tnfsf9,Tyrobp,Wnt10b,Tlr2,Tnfsf13b,Dll4,Clec4e,Clcf1,Bcl11b,Tmem176b,Nrarp,Ocstamp,Nfkbiz,Card11,Nfkbid,Cd300lf	41/496
3_Member	GO Biological Processes	GO:0070665	positive regulation of leukocyte proliferation	-7.01279	-4.85523	12182,12519,12721,12772,12983,12984,16175,16176,17260,18106,18950,19264,20423,20963,21950,24099,56708,60533,74614,78317,83430,108723,384783	Bst1,Cd80,Coro1a,Ccr2,Csf2rb,Csf2rb2,Il1a,Il1b,Mef2c,Cd244a,Pnp,Ptprc,Shh,Syk,Tnfsf9,Tnfsf13b,Clcf1,Cd274,Ocstamp,Ccdc88b,Il23a,Card11,Irs2	23/195
3_Member	GO Biological Processes	GO:1903131	mononuclear cell differentiation	-6.04572	-4.01724	12159,12393,12571,14025,14284,16186,16190,16450,16818,17260,17305,17474,18018,18733,18950,19152,19264,20423,20963,21414,21929,21950,22410,24099,54485,56619,56708,58208,65963,67122,80859,108723,243910	Bmp4,Runx2,Cdk6,Bcl11a,Fosl2,Il2rg,Il4ra,Jag2,Lck,Mef2c,Mfng,Clec4d,Nfatc1,Pirb,Pnp,Prtn3,Ptprc,Shh,Syk,Tcf7,Tnfaip3,Tnfsf9,Wnt10b,Tnfsf13b,Dll4,Clec4e,Clcf1,Bcl11b,Tmem176b,Nrarp,Nfkbiz,Card11,Nfkbid	33/398
3_Member	GO Biological Processes	GO:0050671	positive regulation of lymphocyte proliferation	-5.92235	-3.91576	12182,12519,12721,12772,16175,16176,17260,18106,18950,19264,20423,20963,21950,24099,56708,60533,78317,83430,108723,384783	Bst1,Cd80,Coro1a,Ccr2,Il1a,Il1b,Mef2c,Cd244a,Pnp,Ptprc,Shh,Syk,Tnfsf9,Tnfsf13b,Clcf1,Cd274,Ccdc88b,Il23a,Card11,Irs2	20/176
3_Member	GO Biological Processes	GO:0032946	positive regulation of mononuclear cell proliferation	-5.80647	-3.82107	12182,12519,12721,12772,16175,16176,17260,18106,18950,19264,20423,20963,21950,24099,56708,60533,78317,83430,108723,384783	Bst1,Cd80,Coro1a,Ccr2,Il1a,Il1b,Mef2c,Cd244a,Pnp,Ptprc,Shh,Syk,Tnfsf9,Tnfsf13b,Clcf1,Cd274,Ccdc88b,Il23a,Card11,Irs2	20/179
3_Member	GO Biological Processes	GO:0030217	T cell differentiation	-5.71002	-3.73372	12393,12571,14025,14284,16186,16190,16450,16818,17474,18950,19264,20423,20963,21414,22410,54485,56619,58208,67122,80859,108723,243910	Runx2,Cdk6,Bcl11a,Fosl2,Il2rg,Il4ra,Jag2,Lck,Clec4d,Pnp,Ptprc,Shh,Syk,Tcf7,Wnt10b,Dll4,Clec4e,Bcl11b,Nrarp,Nfkbiz,Card11,Nfkbid	22/214
3_Member	GO Biological Processes	GO:0045321	leukocyte activation	-5.69065	-3.71944	12393,12505,12519,12571,12721,13052,13421,13615,14025,14284,14727,14728,15894,16186,16190,16409,16414,16450,16803,16818,17260,17305,17474,18018,18106,18733,18950,19264,20423,20963,21414,21926,21929,21950,22177,22410,24088,24099,26903,54485,56619,56644,56708,58208,67122,80859,83430,108723,243910	Runx2,Cd44,Cd80,Cdk6,Coro1a,Cxadr,Dnase1l3,Edn2,Bcl11a,Fosl2,Lilrb4b,Lilrb4a,Icam1,Il2rg,Il4ra,Itgam,Itgb2,Jag2,Lbp,Lck,Mef2c,Mfng,Clec4d,Nfatc1,Cd244a,Pirb,Pnp,Ptprc,Shh,Syk,Tcf7,Tnf,Tnfaip3,Tnfsf9,Tyrobp,Wnt10b,Tlr2,Tnfsf13b,Dysf,Dll4,Clec4e,Clec7a,Clcf1,Bcl11b,Nrarp,Nfkbiz,Il23a,Card11,Nfkbid	49/741
3_Member	GO Biological Processes	GO:0042102	positive regulation of T cell proliferation	-5.17963	-3.2795	12519,12721,12772,16175,16176,18106,18950,19264,20423,20963,21950,24099,60533,78317,83430,108723	Cd80,Coro1a,Ccr2,Il1a,Il1b,Cd244a,Pnp,Ptprc,Shh,Syk,Tnfsf9,Tnfsf13b,Cd274,Ccdc88b,Il23a,Card11	16/133
3_Member	GO Biological Processes	GO:0042110	T cell activation	-5.15152	-3.25888	12393,12505,12519,12571,12721,13052,14025,14284,14728,15894,16186,16190,16409,16414,16450,16818,17474,18950,19264,20423,20963,21414,22410,24099,54485,56619,58208,67122,80859,83430,108723,243910	Runx2,Cd44,Cd80,Cdk6,Coro1a,Cxadr,Bcl11a,Fosl2,Lilrb4a,Icam1,Il2rg,Il4ra,Itgam,Itgb2,Jag2,Lck,Clec4d,Pnp,Ptprc,Shh,Syk,Tcf7,Wnt10b,Tnfsf13b,Dll4,Clec4e,Bcl11b,Nrarp,Nfkbiz,Il23a,Card11,Nfkbid	32/418
3_Member	GO Biological Processes	GO:0030098	lymphocyte differentiation	-4.58614	-2.79115	12393,12571,14025,14284,16186,16190,16450,16818,17305,17474,18018,18950,19264,20423,20963,21414,21929,22410,24099,54485,56619,56708,58208,67122,80859,108723,243910	Runx2,Cdk6,Bcl11a,Fosl2,Il2rg,Il4ra,Jag2,Lck,Mfng,Clec4d,Nfatc1,Pnp,Ptprc,Shh,Syk,Tcf7,Tnfaip3,Wnt10b,Tnfsf13b,Dll4,Clec4e,Clcf1,Bcl11b,Nrarp,Nfkbiz,Card11,Nfkbid	27/346
3_Member	GO Biological Processes	GO:0046649	lymphocyte activation	-4.14005	-2.42534	12393,12505,12519,12571,12721,13052,14025,14284,14728,15894,16186,16190,16409,16414,16450,16818,17260,17305,17474,18018,18106,18950,19264,20423,20963,21414,21929,22410,24099,54485,56619,56708,58208,67122,80859,83430,108723,243910	Runx2,Cd44,Cd80,Cdk6,Coro1a,Cxadr,Bcl11a,Fosl2,Lilrb4a,Icam1,Il2rg,Il4ra,Itgam,Itgb2,Jag2,Lck,Mef2c,Mfng,Clec4d,Nfatc1,Cd244a,Pnp,Ptprc,Shh,Syk,Tcf7,Tnfaip3,Wnt10b,Tnfsf13b,Dll4,Clec4e,Clcf1,Bcl11b,Nrarp,Nfkbiz,Il23a,Card11,Nfkbid	38/600
3_Member	GO Biological Processes	GO:0046640	regulation of alpha-beta T cell proliferation	-3.97861	-2.30221	12505,12519,12772,18106,19264,20963,60533,74048,83430,108723	Cd44,Cd80,Ccr2,Cd244a,Ptprc,Syk,Cd274,Vsir,Il23a,Card11	10/72
3_Member	GO Biological Processes	GO:0046641	positive regulation of alpha-beta T cell proliferation	-2.91266	-1.46238	12519,12772,18106,19264,20963,83430,108723	Cd80,Ccr2,Cd244a,Ptprc,Syk,Il23a,Card11	7/51
3_Member	GO Biological Processes	GO:0042098	T cell proliferation	-2.75616	-1.34618	12721,14728,16409,16414,18950,19264,20423,24099,83430,108723	Coro1a,Lilrb4a,Itgam,Itgb2,Pnp,Ptprc,Shh,Tnfsf13b,Il23a,Card11	10/102
3_Member	GO Biological Processes	GO:0046631	alpha-beta T cell activation	-2.53817	-1.17559	14284,14728,16186,16190,18950,19264,20423,20963,21414,58208,80859,108723	Fosl2,Lilrb4a,Il2rg,Il4ra,Pnp,Ptprc,Shh,Syk,Tcf7,Bcl11b,Nfkbiz,Card11	12/146
3_Member	GO Biological Processes	GO:0046632	alpha-beta T cell differentiation	-2.49469	-1.13755	14284,16186,16190,18950,20423,20963,21414,58208,80859	Fosl2,Il2rg,Il4ra,Pnp,Shh,Syk,Tcf7,Bcl11b,Nfkbiz	9/93
3_Member	GO Biological Processes	GO:0046651	lymphocyte proliferation	-2.34619	-1.02851	12721,14284,14728,16409,16414,17260,18950,19264,20423,24099,80859,83430,108723	Coro1a,Fosl2,Lilrb4a,Itgam,Itgb2,Mef2c,Pnp,Ptprc,Shh,Tnfsf13b,Nfkbiz,Il23a,Card11	13/174
3_Member	GO Biological Processes	GO:0032943	mononuclear cell proliferation	-2.28418	-0.987992	12721,14284,14728,16409,16414,17260,18950,19264,20423,24099,80859,83430,108723	Coro1a,Fosl2,Lilrb4a,Itgam,Itgb2,Mef2c,Pnp,Ptprc,Shh,Tnfsf13b,Nfkbiz,Il23a,Card11	13/177
3_Member	GO Biological Processes	GO:0070661	leukocyte proliferation	-2.27344	-0.977729	12721,14284,14728,16409,16414,17260,18162,18950,19264,20423,24099,80859,83430,108723	Coro1a,Fosl2,Lilrb4a,Itgam,Itgb2,Mef2c,Npr3,Pnp,Ptprc,Shh,Tnfsf13b,Nfkbiz,Il23a,Card11	14/198
3_Member	GO Biological Processes	GO:0045577	regulation of B cell differentiation	-2.13613	-0.875573	14728,16186,18950,20963,108723	Lilrb4a,Il2rg,Pnp,Syk,Card11	5/38
4_Summary	GO Biological Processes	GO:0040017	positive regulation of locomotion	-15.6184	-12.5326	11826,11876,12061,12156,12159,12162,12554,12562,12721,12768,12772,12773,12778,13214,13615,14114,14191,14289,14343,14632,15200,15507,15586,15894,16001,16175,16176,16411,16542,16803,17393,17395,17918,18003,18024,18205,18590,18613,19264,19283,19713,20344,20348,20359,20423,21808,24088,26903,50930,56644,58217,60533,63873,66102,66166,66922,74048,80982,83430,93695,114332,207686,230738,329252,353310,3847…	Aqp1,Artn,Bdkrb1,Bmp2,Bmp4,Bmp7,Cdh13,Cdh5,Coro1a,Ccr1,Ccr2,Ccr4,Ackr3,Defb1,Edn2,Fbln1,Fgr,Fpr2,Fut1,Gli1,Hbegf,Hspb1,Hyal1,Icam1,Igf1r,Il1a,Il1b,Itgax,Kdr,Lbp,Mmp7,Mmp9,Myo5a,Nedd9,Nfe2l2,Ntf3,Pdgfa,Pecam1,Ptprc,Ptprz1,Ret,Selp,Sema3c,Sema6b,Shh,Tgfb2,Tlr2,Dysf,Tnfsf14,Clec7a,Trem1,Cd274,Trpv4,Cxcl16,S100a14,Rras2,Vsir,Cemip,Il23a,Gpnmb,Lyve1,Cfap69,Zc3h12a,Lgr6,Zfp703,Irs2,Bst1,Fut9,Ccn3,Dusp1…	73/-
4_Member	GO Biological Processes	GO:0040017	positive regulation of locomotion	-15.6184	-12.5326	11826,11876,12061,12156,12159,12162,12554,12562,12721,12768,12772,12773,12778,13214,13615,14114,14191,14289,14343,14632,15200,15507,15586,15894,16001,16175,16176,16411,16542,16803,17393,17395,17918,18003,18024,18205,18590,18613,19264,19283,19713,20344,20348,20359,20423,21808,24088,26903,50930,56644,58217,60533,63873,66102,66166,66922,74048,80982,83430,93695,114332,207686,230738,329252,353310,3847…	Aqp1,Artn,Bdkrb1,Bmp2,Bmp4,Bmp7,Cdh13,Cdh5,Coro1a,Ccr1,Ccr2,Ccr4,Ackr3,Defb1,Edn2,Fbln1,Fgr,Fpr2,Fut1,Gli1,Hbegf,Hspb1,Hyal1,Icam1,Igf1r,Il1a,Il1b,Itgax,Kdr,Lbp,Mmp7,Mmp9,Myo5a,Nedd9,Nfe2l2,Ntf3,Pdgfa,Pecam1,Ptprc,Ptprz1,Ret,Selp,Sema3c,Sema6b,Shh,Tgfb2,Tlr2,Dysf,Tnfsf14,Clec7a,Trem1,Cd274,Trpv4,Cxcl16,S100a14,Rras2,Vsir,Cemip,Il23a,Gpnmb,Lyve1,Cfap69,Zc3h12a,Lgr6,Zfp703,Irs2	66/654
4_Member	GO Biological Processes	GO:2000147	positive regulation of cell motility	-15.0258	-12.0649	11826,12061,12156,12159,12162,12554,12562,12721,12768,12772,12778,13214,13615,14114,14191,14289,14343,14632,15200,15507,15586,15894,16001,16175,16176,16411,16542,16803,17393,17395,17918,18003,18024,18205,18590,18613,19264,19283,19713,20344,20348,20359,20423,21808,24088,26903,50930,56644,58217,60533,63873,66102,66166,66922,74048,80982,83430,93695,114332,207686,230738,329252,353310,384783	Aqp1,Bdkrb1,Bmp2,Bmp4,Bmp7,Cdh13,Cdh5,Coro1a,Ccr1,Ccr2,Ackr3,Defb1,Edn2,Fbln1,Fgr,Fpr2,Fut1,Gli1,Hbegf,Hspb1,Hyal1,Icam1,Igf1r,Il1a,Il1b,Itgax,Kdr,Lbp,Mmp7,Mmp9,Myo5a,Nedd9,Nfe2l2,Ntf3,Pdgfa,Pecam1,Ptprc,Ptprz1,Ret,Selp,Sema3c,Sema6b,Shh,Tgfb2,Tlr2,Dysf,Tnfsf14,Clec7a,Trem1,Cd274,Trpv4,Cxcl16,S100a14,Rras2,Vsir,Cemip,Il23a,Gpnmb,Lyve1,Cfap69,Zc3h12a,Lgr6,Zfp703,Irs2	64/638
4_Member	GO Biological Processes	GO:0030335	positive regulation of cell migration	-14.8644	-11.9248	11826,12061,12156,12159,12162,12554,12562,12721,12768,12772,12778,13615,14114,14191,14289,14343,14632,15200,15507,15586,15894,16001,16175,16176,16411,16542,16803,17393,17395,17918,18003,18024,18205,18590,18613,19264,19283,19713,20344,20348,20359,20423,21808,24088,26903,50930,56644,58217,60533,63873,66102,66166,66922,74048,80982,83430,93695,114332,230738,329252,353310,384783	Aqp1,Bdkrb1,Bmp2,Bmp4,Bmp7,Cdh13,Cdh5,Coro1a,Ccr1,Ccr2,Ackr3,Edn2,Fbln1,Fgr,Fpr2,Fut1,Gli1,Hbegf,Hspb1,Hyal1,Icam1,Igf1r,Il1a,Il1b,Itgax,Kdr,Lbp,Mmp7,Mmp9,Myo5a,Nedd9,Nfe2l2,Ntf3,Pdgfa,Pecam1,Ptprc,Ptprz1,Ret,Selp,Sema3c,Sema6b,Shh,Tgfb2,Tlr2,Dysf,Tnfsf14,Clec7a,Trem1,Cd274,Trpv4,Cxcl16,S100a14,Rras2,Vsir,Cemip,Il23a,Gpnmb,Lyve1,Zc3h12a,Lgr6,Zfp703,Irs2	62/609
4_Member	GO Biological Processes	GO:0002685	regulation of leukocyte migration	-7.82383	-5.54424	12061,12182,12721,12768,12772,13615,14289,14348,15894,16175,16176,16803,17395,18003,18133,18613,19252,20344,24088,26903,50930,58217,63873,66166,83430,114332,216892,257632	Bdkrb1,Bst1,Coro1a,Ccr1,Ccr2,Edn2,Fpr2,Fut9,Icam1,Il1a,Il1b,Lbp,Mmp9,Nedd9,Ccn3,Pecam1,Dusp1,Selp,Tlr2,Dysf,Tnfsf14,Trem1,Trpv4,S100a14,Il23a,Lyve1,Spns2,Nod2	28/252
4_Member	GO Biological Processes	GO:0050920	regulation of chemotaxis	-7.45443	-5.226	11876,12182,12554,12768,12772,12773,13615,13642,14289,15507,16176,16542,16803,18003,18133,18205,19252,20348,20359,20423,26903,50930,58217,63873,66166,83430,257632	Artn,Bst1,Cdh13,Ccr1,Ccr2,Ccr4,Edn2,Efnb2,Fpr2,Hspb1,Il1b,Kdr,Lbp,Nedd9,Ccn3,Ntf3,Dusp1,Sema3c,Sema6b,Shh,Dysf,Tnfsf14,Trem1,Trpv4,S100a14,Il23a,Nod2	27/246
4_Member	GO Biological Processes	GO:0002687	positive regulation of leukocyte migration	-7.05407	-4.87857	12061,12721,12768,12772,13615,14289,15894,16175,16176,16803,17395,18003,18613,20344,24088,26903,50930,58217,63873,66166,83430,114332	Bdkrb1,Coro1a,Ccr1,Ccr2,Edn2,Fpr2,Icam1,Il1a,Il1b,Lbp,Mmp9,Nedd9,Pecam1,Selp,Tlr2,Dysf,Tnfsf14,Trem1,Trpv4,S100a14,Il23a,Lyve1	22/179
4_Member	GO Biological Processes	GO:0050921	positive regulation of chemotaxis	-6.24545	-4.17949	11876,12554,12768,12772,12773,13615,14289,15507,16176,16542,16803,18003,18205,20423,26903,50930,58217,63873,66166,83430	Artn,Cdh13,Ccr1,Ccr2,Ccr4,Edn2,Fpr2,Hspb1,Il1b,Kdr,Lbp,Nedd9,Ntf3,Shh,Dysf,Tnfsf14,Trem1,Trpv4,S100a14,Il23a	20/168
4_Member	GO Biological Processes	GO:0002688	regulation of leukocyte chemotaxis	-5.5209	-3.57501	12182,12768,12772,13615,14289,16176,16803,18003,18133,19252,26903,50930,58217,63873,66166,83430,257632	Bst1,Ccr1,Ccr2,Edn2,Fpr2,Il1b,Lbp,Nedd9,Ccn3,Dusp1,Dysf,Tnfsf14,Trem1,Trpv4,S100a14,Il23a,Nod2	17/140
4_Member	GO Biological Processes	GO:0002690	positive regulation of leukocyte chemotaxis	-4.07759	-2.38393	12768,12772,13615,14289,16176,16803,18003,26903,50930,58217,63873,66166,83430	Ccr1,Ccr2,Edn2,Fpr2,Il1b,Lbp,Nedd9,Dysf,Tnfsf14,Trem1,Trpv4,S100a14,Il23a	13/114
4_Member	GO Biological Processes	GO:0090025	regulation of monocyte chemotaxis	-3.01574	-1.54487	12768,12772,14289,18133,19252,66166	Ccr1,Ccr2,Fpr2,Ccn3,Dusp1,S100a14	6/36
4_Member	GO Biological Processes	GO:0071675	regulation of mononuclear cell migration	-2.90848	-1.45886	12721,12768,12772,14289,18003,18133,19252,50930,58217,63873,66166,216892	Coro1a,Ccr1,Ccr2,Fpr2,Nedd9,Ccn3,Dusp1,Tnfsf14,Trem1,Trpv4,S100a14,Spns2	12/132
5_Summary	GO Biological Processes	GO:0042303	molting cycle	-15.0317	-12.0649	12023,12399,12614,13393,13608,14160,14313,15422,16664,16675,16769,17918,18590,19207,20423,21808,22061,22409,22410,66042,70810,70843,93746,228357,232077,252974,494504,16600,16678,55948,74591,80859,433091,12006,12156,12159,12162,12393,16450,17300,22420,58208,68668,83395,320100,546144,317653	Barx2,Runx3,Celsr1,Dlx3,Edar,Lgr5,Fst,Hoxc13,Krt14,Krt27,Dsg4,Myo5a,Pdgfa,Ptch2,Shh,Tgfb2,Trp63,Wnt10a,Wnt10b,Sostdc1,Krt25,Krt28,Gprc5d,Lrp4,Foxi3,Tspear,Apcdd1,Klf4,Krt1,Sfn,Abca12,Nfkbiz,Pnpla1,Axin2,Bmp2,Bmp4,Bmp7,Runx2,Jag2,Foxc1,Wnt6,Bcl11b,Klk5,Sp6,Relt,Wdr72,Klk14	47/-
5_Member	GO Biological Processes	GO:0042303	molting cycle	-15.0317	-12.0649	12023,12399,12614,13393,13608,14160,14313,15422,16664,16675,16769,17918,18590,19207,20423,21808,22061,22409,22410,66042,70810,70843,93746,228357,232077,252974,494504	Barx2,Runx3,Celsr1,Dlx3,Edar,Lgr5,Fst,Hoxc13,Krt14,Krt27,Dsg4,Myo5a,Pdgfa,Ptch2,Shh,Tgfb2,Trp63,Wnt10a,Wnt10b,Sostdc1,Krt25,Krt28,Gprc5d,Lrp4,Foxi3,Tspear,Apcdd1	27/119
5_Member	GO Biological Processes	GO:0042633	hair cycle	-15.0317	-12.0649	12023,12399,12614,13393,13608,14160,14313,15422,16664,16675,16769,17918,18590,19207,20423,21808,22061,22409,22410,66042,70810,70843,93746,228357,232077,252974,494504	Barx2,Runx3,Celsr1,Dlx3,Edar,Lgr5,Fst,Hoxc13,Krt14,Krt27,Dsg4,Myo5a,Pdgfa,Ptch2,Shh,Tgfb2,Trp63,Wnt10a,Wnt10b,Sostdc1,Krt25,Krt28,Gprc5d,Lrp4,Foxi3,Tspear,Apcdd1	27/119
5_Member	GO Biological Processes	GO:0098773	skin epidermis development	-13.9051	-11.0412	12023,12399,12614,13393,13608,14160,14313,15422,16600,16675,16678,16769,17918,18590,20423,21808,22061,22409,22410,55948,66042,70810,70843,74591,80859,228357,232077,433091,494504	Barx2,Runx3,Celsr1,Dlx3,Edar,Lgr5,Fst,Hoxc13,Klf4,Krt27,Krt1,Dsg4,Myo5a,Pdgfa,Shh,Tgfb2,Trp63,Wnt10a,Wnt10b,Sfn,Sostdc1,Krt25,Krt28,Abca12,Nfkbiz,Lrp4,Foxi3,Pnpla1,Apcdd1	29/153
5_Member	GO Biological Processes	GO:0022404	molting cycle process	-12.7532	-10.0098	12023,12399,12614,13393,13608,14160,14313,15422,16675,16769,17918,18590,20423,21808,22061,22409,22410,66042,70810,70843,228357,232077,252974,494504	Barx2,Runx3,Celsr1,Dlx3,Edar,Lgr5,Fst,Hoxc13,Krt27,Dsg4,Myo5a,Pdgfa,Shh,Tgfb2,Trp63,Wnt10a,Wnt10b,Sostdc1,Krt25,Krt28,Lrp4,Foxi3,Tspear,Apcdd1	24/113
5_Member	GO Biological Processes	GO:0022405	hair cycle process	-12.7532	-10.0098	12023,12399,12614,13393,13608,14160,14313,15422,16675,16769,17918,18590,20423,21808,22061,22409,22410,66042,70810,70843,228357,232077,252974,494504	Barx2,Runx3,Celsr1,Dlx3,Edar,Lgr5,Fst,Hoxc13,Krt27,Dsg4,Myo5a,Pdgfa,Shh,Tgfb2,Trp63,Wnt10a,Wnt10b,Sostdc1,Krt25,Krt28,Lrp4,Foxi3,Tspear,Apcdd1	24/113
5_Member	GO Biological Processes	GO:0001942	hair follicle development	-12.1848	-9.45437	12023,12399,12614,13393,13608,14160,14313,15422,16675,16769,17918,18590,20423,21808,22061,22409,22410,66042,70810,70843,228357,232077,494504	Barx2,Runx3,Celsr1,Dlx3,Edar,Lgr5,Fst,Hoxc13,Krt27,Dsg4,Myo5a,Pdgfa,Shh,Tgfb2,Trp63,Wnt10a,Wnt10b,Sostdc1,Krt25,Krt28,Lrp4,Foxi3,Apcdd1	23/109
5_Member	GO Biological Processes	GO:0042476	odontogenesis	-11.5853	-8.91449	12006,12156,12159,12162,12393,13393,13608,14313,16450,17300,17918,20423,22061,22409,22420,58208,66042,68668,83395,228357,252974,320100,546144	Axin2,Bmp2,Bmp4,Bmp7,Runx2,Dlx3,Edar,Fst,Jag2,Foxc1,Myo5a,Shh,Trp63,Wnt10a,Wnt6,Bcl11b,Sostdc1,Klk5,Sp6,Lrp4,Tspear,Relt,Wdr72	23/116
5_Member	GO Biological Processes	GO:0042475	odontogenesis of dentin-containing tooth	-9.97617	-7.43031	12156,12159,12162,12393,13393,13608,14313,16450,17300,20423,22061,22420,58208,66042,68668,228357,320100,546144	Bmp2,Bmp4,Bmp7,Runx2,Dlx3,Edar,Fst,Jag2,Foxc1,Shh,Trp63,Wnt6,Bcl11b,Sostdc1,Klk5,Lrp4,Relt,Wdr72	18/82
5_Member	GO Biological Processes	GO:0048730	epidermis morphogenesis	-9.0954	-6.65962	12399,13393,14313,16600,16675,20423,21808,22061,22409,66042,70810,70843,317653	Runx3,Dlx3,Fst,Klf4,Krt27,Shh,Tgfb2,Trp63,Wnt10a,Sostdc1,Krt25,Krt28,Klk14	13/44
5_Member	GO Biological Processes	GO:0031069	hair follicle morphogenesis	-7.68197	-5.41134	12399,13393,14313,16675,20423,21808,22061,22409,66042,70810,70843	Runx3,Dlx3,Fst,Krt27,Shh,Tgfb2,Trp63,Wnt10a,Sostdc1,Krt25,Krt28	11/38
6_Summary	GO Biological Processes	GO:0032103	positive regulation of response to external stimulus	-12.9628	-10.1923	11690,11770,11876,12161,12266,12491,12554,12606,12768,12772,12773,13032,13615,14283,14289,15507,16001,16176,16365,16542,16803,17002,17381,18003,18035,18205,18413,20201,20202,20302,20423,20963,21926,22177,23993,24088,26903,50930,53791,54483,56312,56619,56620,56644,58217,63873,65221,66166,66725,68668,80859,83430,83490,216799,225825,229898,246746,257632,327957,17260,12268,12505,14284,14960,16190,164…	Alox5ap,Fabp4,Artn,Bmp6,C3,Cd36,Cdh13,Cebpa,Ccr1,Ccr2,Ccr4,Ctsc,Edn2,Fosl1,Fpr2,Hspb1,Igf1r,Il1b,Acod1,Kdr,Lbp,Ltf,Mmp12,Nedd9,Nfkbia,Ntf3,Osm,S100a8,S100a9,Ccl3,Shh,Syk,Tnf,Tyrobp,Klk7,Tlr2,Dysf,Tnfsf14,Tlr5,Mefv,Nupr1,Clec4e,Clec4n,Clec7a,Trem1,Trpv4,Slc15a3,S100a14,Lrrk2,Klk5,Nfkbiz,Il23a,Pik3ap1,Nlrp3,Cd226,Gbp5,Cd300lf,Nod2,Scimp,Mef2c,C4b,Cd44,Fosl2,H2-Aa,Il4ra,Itgam,Itgb2,Krt1,Lck,Masp1,Pr…	91/-
6_Member	GO Biological Processes	GO:0032103	positive regulation of response to external stimulus	-12.9628	-10.1923	11690,11770,11876,12161,12266,12491,12554,12606,12768,12772,12773,13032,13615,14283,14289,15507,16001,16176,16365,16542,16803,17002,17381,18003,18035,18205,18413,20201,20202,20302,20423,20963,21926,22177,23993,24088,26903,50930,53791,54483,56312,56619,56620,56644,58217,63873,65221,66166,66725,68668,80859,83430,83490,216799,225825,229898,246746,257632,327957	Alox5ap,Fabp4,Artn,Bmp6,C3,Cd36,Cdh13,Cebpa,Ccr1,Ccr2,Ccr4,Ctsc,Edn2,Fosl1,Fpr2,Hspb1,Igf1r,Il1b,Acod1,Kdr,Lbp,Ltf,Mmp12,Nedd9,Nfkbia,Ntf3,Osm,S100a8,S100a9,Ccl3,Shh,Syk,Tnf,Tyrobp,Klk7,Tlr2,Dysf,Tnfsf14,Tlr5,Mefv,Nupr1,Clec4e,Clec4n,Clec7a,Trem1,Trpv4,Slc15a3,S100a14,Lrrk2,Klk5,Nfkbiz,Il23a,Pik3ap1,Nlrp3,Cd226,Gbp5,Cd300lf,Nod2,Scimp	59/617
6_Member	GO Biological Processes	GO:0031349	positive regulation of defense response	-9.6364	-7.13042	11690,11770,12266,12491,12606,12772,13032,14283,14289,16176,16365,16803,17002,17260,17381,18035,18413,20201,20202,20302,20963,21926,22177,23993,24088,53791,54483,56312,56619,56620,56644,63873,65221,66166,66725,68668,80859,83490,216799,225825,229898,246746,257632,327957	Alox5ap,Fabp4,C3,Cd36,Cebpa,Ccr2,Ctsc,Fosl1,Fpr2,Il1b,Acod1,Lbp,Ltf,Mef2c,Mmp12,Nfkbia,Osm,S100a8,S100a9,Ccl3,Syk,Tnf,Tyrobp,Klk7,Tlr2,Tlr5,Mefv,Nupr1,Clec4e,Clec4n,Clec7a,Trpv4,Slc15a3,S100a14,Lrrk2,Klk5,Nfkbiz,Pik3ap1,Nlrp3,Cd226,Gbp5,Cd300lf,Nod2,Scimp	44/465
6_Member	GO Biological Processes	GO:0050778	positive regulation of immune response	-9.21614	-6.7672	12266,12268,12491,12505,12772,14283,14284,14289,14960,16176,16190,16365,16409,16414,16678,16803,16818,17002,17174,17260,17381,18035,18755,18950,19264,20963,21926,22177,23993,24088,24099,53791,54483,56619,56620,56644,56708,60533,65221,66166,66214,68668,80859,83430,83490,108723,214855,216799,225825,229898,230738,243910,246746,257632,327957	C3,C4b,Cd36,Cd44,Ccr2,Fosl1,Fosl2,Fpr2,H2-Aa,Il1b,Il4ra,Acod1,Itgam,Itgb2,Krt1,Lbp,Lck,Ltf,Masp1,Mef2c,Mmp12,Nfkbia,Prkch,Pnp,Ptprc,Syk,Tnf,Tyrobp,Klk7,Tlr2,Tnfsf13b,Tlr5,Mefv,Clec4e,Clec4n,Clec7a,Clcf1,Cd274,Slc15a3,S100a14,Rgcc,Klk5,Nfkbiz,Il23a,Pik3ap1,Card11,Arid5a,Nlrp3,Cd226,Gbp5,Zc3h12a,Nfkbid,Cd300lf,Nod2,Scimp	55/684
6_Member	GO Biological Processes	GO:0002764	immune response-regulating signaling pathway	-8.41253	-6.06975	12266,14283,14284,14289,14727,14728,16409,16803,16818,17260,17474,18035,18703,19264,20963,21926,22177,24088,53791,54483,56619,56620,56644,66166,80859,83490,216799,230738,243910,246746,257632,327957	C3,Fosl1,Fosl2,Fpr2,Lilrb4b,Lilrb4a,Itgam,Lbp,Lck,Mef2c,Clec4d,Nfkbia,Pigr,Ptprc,Syk,Tnf,Tyrobp,Tlr2,Tlr5,Mefv,Clec4e,Clec4n,Clec7a,S100a14,Nfkbiz,Pik3ap1,Nlrp3,Zc3h12a,Nfkbid,Cd300lf,Nod2,Scimp	32/300
6_Member	GO Biological Processes	GO:0002768	immune response-regulating cell surface receptor signaling pathway	-8.15994	-5.84256	12266,14284,14289,14727,14728,16409,16803,16818,17260,17474,18035,18703,19264,20963,22177,24088,53791,56619,56620,56644,66166,80859,83490,230738,243910,257632,327957	C3,Fosl2,Fpr2,Lilrb4b,Lilrb4a,Itgam,Lbp,Lck,Mef2c,Clec4d,Nfkbia,Pigr,Ptprc,Syk,Tyrobp,Tlr2,Tlr5,Clec4e,Clec4n,Clec7a,S100a14,Nfkbiz,Pik3ap1,Zc3h12a,Nfkbid,Nod2,Scimp	27/228
6_Member	GO Biological Processes	GO:0002758	innate immune response-activating signaling pathway	-7.38459	-5.16016	14283,16803,18035,20963,21926,22177,24088,53791,54483,56619,56620,56644,66166,80859,83490,216799,246746,257632,327957	Fosl1,Lbp,Nfkbia,Syk,Tnf,Tyrobp,Tlr2,Tlr5,Mefv,Clec4e,Clec4n,Clec7a,S100a14,Nfkbiz,Pik3ap1,Nlrp3,Cd300lf,Nod2,Scimp	19/130
6_Member	GO Biological Processes	GO:0002220	innate immune response activating cell surface receptor signaling pathway	-6.7328	-4.61082	16803,18035,20963,22177,24088,53791,56620,56644,66166,83490,257632,327957	Lbp,Nfkbia,Syk,Tyrobp,Tlr2,Tlr5,Clec4n,Clec7a,S100a14,Pik3ap1,Nod2,Scimp	12/56
6_Member	GO Biological Processes	GO:0002757	immune response-activating signaling pathway	-6.62065	-4.51413	12266,14283,14284,14289,16409,16803,16818,17260,18035,19264,20963,21926,22177,24088,53791,54483,56619,56620,56644,66166,80859,83490,216799,230738,243910,246746,257632,327957	C3,Fosl1,Fosl2,Fpr2,Itgam,Lbp,Lck,Mef2c,Nfkbia,Ptprc,Syk,Tnf,Tyrobp,Tlr2,Tlr5,Mefv,Clec4e,Clec4n,Clec7a,S100a14,Nfkbiz,Pik3ap1,Nlrp3,Zc3h12a,Nfkbid,Cd300lf,Nod2,Scimp	28/287
6_Member	GO Biological Processes	GO:0002253	activation of immune response	-6.44715	-4.34964	12266,12268,14283,14284,14289,16409,16678,16803,16818,17174,17260,18035,19264,20963,21926,22177,24088,53791,54483,56619,56620,56644,66166,66214,80859,83490,216799,229898,230738,243910,246746,257632,327957	C3,C4b,Fosl1,Fosl2,Fpr2,Itgam,Krt1,Lbp,Lck,Masp1,Mef2c,Nfkbia,Ptprc,Syk,Tnf,Tyrobp,Tlr2,Tlr5,Mefv,Clec4e,Clec4n,Clec7a,S100a14,Rgcc,Nfkbiz,Pik3ap1,Nlrp3,Gbp5,Zc3h12a,Nfkbid,Cd300lf,Nod2,Scimp	33/382
6_Member	GO Biological Processes	GO:0002833	positive regulation of response to biotic stimulus	-6.2204	-4.16266	12161,12491,14283,14289,16365,16803,17002,17381,18035,20963,21926,22177,23993,24088,53791,54483,56619,56620,56644,60533,65221,66166,68668,80859,83490,216799,225825,229898,246746,257632,327957	Bmp6,Cd36,Fosl1,Fpr2,Acod1,Lbp,Ltf,Mmp12,Nfkbia,Syk,Tnf,Tyrobp,Klk7,Tlr2,Tlr5,Mefv,Clec4e,Clec4n,Clec7a,Cd274,Slc15a3,S100a14,Klk5,Nfkbiz,Pik3ap1,Nlrp3,Cd226,Gbp5,Cd300lf,Nod2,Scimp	31/354
6_Member	GO Biological Processes	GO:0002218	activation of innate immune response	-6.04105	-4.01724	14283,16803,18035,20963,21926,22177,24088,53791,54483,56619,56620,56644,66166,80859,83490,216799,229898,246746,257632,327957	Fosl1,Lbp,Nfkbia,Syk,Tnf,Tyrobp,Tlr2,Tlr5,Mefv,Clec4e,Clec4n,Clec7a,S100a14,Nfkbiz,Pik3ap1,Nlrp3,Gbp5,Cd300lf,Nod2,Scimp	20/173
6_Member	GO Biological Processes	GO:0002221	pattern recognition receptor signaling pathway	-5.82042	-3.83272	14283,16803,18035,21926,24088,53791,54483,56619,56644,66166,80859,83490,216799,246746,257632,327957	Fosl1,Lbp,Nfkbia,Tnf,Tlr2,Tlr5,Mefv,Clec4e,Clec7a,S100a14,Nfkbiz,Pik3ap1,Nlrp3,Cd300lf,Nod2,Scimp	16/119
6_Member	GO Biological Processes	GO:0002831	regulation of response to biotic stimulus	-5.70109	-3.72704	12161,12491,12768,14191,14283,14289,16176,16365,16803,17002,17381,18024,18035,20963,21926,21929,22177,23993,24088,53791,54483,56213,56619,56620,56644,60533,65221,66166,66222,68668,80859,83430,83490,140474,216799,225825,229898,230738,246746,257632,327957	Bmp6,Cd36,Ccr1,Fgr,Fosl1,Fpr2,Il1b,Acod1,Lbp,Ltf,Mmp12,Nfe2l2,Nfkbia,Syk,Tnf,Tnfaip3,Tyrobp,Klk7,Tlr2,Tlr5,Mefv,Htra1,Clec4e,Clec4n,Clec7a,Cd274,Slc15a3,S100a14,Serpinb1a,Klk5,Nfkbiz,Il23a,Pik3ap1,Muc4,Nlrp3,Cd226,Gbp5,Zc3h12a,Cd300lf,Nod2,Scimp	41/572
6_Member	GO Biological Processes	GO:0002429	immune response-activating cell surface receptor signaling pathway	-5.64282	-3.67762	12266,14284,14289,16409,16803,16818,17260,18035,19264,20963,22177,24088,53791,56620,56644,66166,80859,83490,230738,243910,257632,327957	C3,Fosl2,Fpr2,Itgam,Lbp,Lck,Mef2c,Nfkbia,Ptprc,Syk,Tyrobp,Tlr2,Tlr5,Clec4n,Clec7a,S100a14,Nfkbiz,Pik3ap1,Zc3h12a,Nfkbid,Nod2,Scimp	22/216
6_Member	GO Biological Processes	GO:0002752	cell surface pattern recognition receptor signaling pathway	-5.01649	-3.14733	16803,18035,24088,53791,56644,66166,83490,257632,327957	Lbp,Nfkbia,Tlr2,Tlr5,Clec7a,S100a14,Pik3ap1,Nod2,Scimp	9/44
6_Member	GO Biological Processes	GO:0045089	positive regulation of innate immune response	-4.62291	-2.82195	12491,14283,14289,16803,17002,17381,18035,20963,21926,22177,24088,53791,54483,56619,56620,56644,65221,66166,80859,83490,216799,225825,229898,246746,257632,327957	Cd36,Fosl1,Fpr2,Lbp,Ltf,Mmp12,Nfkbia,Syk,Tnf,Tyrobp,Tlr2,Tlr5,Mefv,Clec4e,Clec4n,Clec7a,Slc15a3,S100a14,Nfkbiz,Pik3ap1,Nlrp3,Cd226,Gbp5,Cd300lf,Nod2,Scimp	26/325
6_Member	GO Biological Processes	GO:0045088	regulation of innate immune response	-4.11604	-2.41048	12491,12768,14191,14283,14289,16365,16803,17002,17381,18024,18035,20963,21926,21929,22177,24088,53791,54483,56619,56620,56644,65221,66166,66222,80859,83490,216799,225825,229898,246746,257632,327957	Cd36,Ccr1,Fgr,Fosl1,Fpr2,Acod1,Lbp,Ltf,Mmp12,Nfe2l2,Nfkbia,Syk,Tnf,Tnfaip3,Tyrobp,Tlr2,Tlr5,Mefv,Clec4e,Clec4n,Clec7a,Slc15a3,S100a14,Serpinb1a,Nfkbiz,Pik3ap1,Nlrp3,Cd226,Gbp5,Cd300lf,Nod2,Scimp	32/472
6_Member	GO Biological Processes	GO:0140895	cell surface toll-like receptor signaling pathway	-3.57208	-1.97581	18035,24088,53791,66166,83490,257632,327957	Nfkbia,Tlr2,Tlr5,S100a14,Pik3ap1,Nod2,Scimp	7/40
7_Summary	GO Biological Processes	GO:0060326	cell chemotaxis	-11.8376	-9.11978	12721,12768,12772,12773,12778,12986,13052,13123,13615,13655,15200,15417,16176,16409,16414,16803,17395,18133,20201,20202,20210,20302,20963,50930,54199,56066,58217,66102,66793,116746,244332,252837,14289,18187,18590,20348,20359,65079,17918,11876,15894,18003,18613,19152,20344,21926,24088,216892	Coro1a,Ccr1,Ccr2,Ccr4,Ackr3,Csf3r,Cxadr,Cyp7b1,Edn2,Egr3,Hbegf,Hoxb9,Il1b,Itgam,Itgb2,Lbp,Mmp9,Ccn3,S100a8,S100a9,Saa3,Ccl3,Syk,Tnfsf14,Ccrl2,Cxcl11,Trem1,Cxcl16,Clxn,Defb6,Defb14,Ackr4,Fpr2,Nrp2,Pdgfa,Sema3c,Sema6b,Rtn4r,Myo5a,Artn,Icam1,Nedd9,Pecam1,Prtn3,Selp,Tnf,Tlr2,Spns2	48/-
7_Member	GO Biological Processes	GO:0060326	cell chemotaxis	-11.8376	-9.11978	12721,12768,12772,12773,12778,12986,13052,13123,13615,13655,15200,15417,16176,16409,16414,16803,17395,18133,20201,20202,20210,20302,20963,50930,54199,56066,58217,66102,66793,116746,244332,252837	Coro1a,Ccr1,Ccr2,Ccr4,Ackr3,Csf3r,Cxadr,Cyp7b1,Edn2,Egr3,Hbegf,Hoxb9,Il1b,Itgam,Itgb2,Lbp,Mmp9,Ccn3,S100a8,S100a9,Saa3,Ccl3,Syk,Tnfsf14,Ccrl2,Cxcl11,Trem1,Cxcl16,Clxn,Defb6,Defb14,Ackr4	32/222
7_Member	GO Biological Processes	GO:0006935	chemotaxis	-10.9067	-8.27827	12721,12768,12772,12773,12778,12986,13052,13123,13615,13655,14289,15200,15417,16176,16409,16414,16803,17395,18133,18187,18590,20201,20202,20210,20302,20348,20359,20963,50930,54199,56066,58217,65079,66102,66793,116746,244332,252837	Coro1a,Ccr1,Ccr2,Ccr4,Ackr3,Csf3r,Cxadr,Cyp7b1,Edn2,Egr3,Fpr2,Hbegf,Hoxb9,Il1b,Itgam,Itgb2,Lbp,Mmp9,Ccn3,Nrp2,Pdgfa,S100a8,S100a9,Saa3,Ccl3,Sema3c,Sema6b,Syk,Tnfsf14,Ccrl2,Cxcl11,Trem1,Rtn4r,Cxcl16,Clxn,Defb6,Defb14,Ackr4	38/329
7_Member	GO Biological Processes	GO:0042330	taxis	-10.8271	-8.21844	12721,12768,12772,12773,12778,12986,13052,13123,13615,13655,14289,15200,15417,16176,16409,16414,16803,17395,18133,18187,18590,20201,20202,20210,20302,20348,20359,20963,50930,54199,56066,58217,65079,66102,66793,116746,244332,252837	Coro1a,Ccr1,Ccr2,Ccr4,Ackr3,Csf3r,Cxadr,Cyp7b1,Edn2,Egr3,Fpr2,Hbegf,Hoxb9,Il1b,Itgam,Itgb2,Lbp,Mmp9,Ccn3,Nrp2,Pdgfa,S100a8,S100a9,Saa3,Ccl3,Sema3c,Sema6b,Syk,Tnfsf14,Ccrl2,Cxcl11,Trem1,Rtn4r,Cxcl16,Clxn,Defb6,Defb14,Ackr4	38/331
7_Member	GO Biological Processes	GO:0040011	locomotion	-10.3624	-7.79075	12721,12768,12772,12773,12778,12986,13052,13123,13615,13655,14289,15200,15417,16176,16409,16414,16803,17395,17918,18133,18187,18590,20201,20202,20210,20302,20348,20359,20963,50930,54199,56066,58217,65079,66102,66793,116746,244332,252837	Coro1a,Ccr1,Ccr2,Ccr4,Ackr3,Csf3r,Cxadr,Cyp7b1,Edn2,Egr3,Fpr2,Hbegf,Hoxb9,Il1b,Itgam,Itgb2,Lbp,Mmp9,Myo5a,Ccn3,Nrp2,Pdgfa,S100a8,S100a9,Saa3,Ccl3,Sema3c,Sema6b,Syk,Tnfsf14,Ccrl2,Cxcl11,Trem1,Rtn4r,Cxcl16,Clxn,Defb6,Defb14,Ackr4	39/359
7_Member	GO Biological Processes	GO:0050900	leukocyte migration	-8.6311	-6.2443	11876,12721,12768,12772,12986,13052,13123,13615,15894,16176,16409,16414,16803,17395,18003,18613,19152,20201,20202,20302,20344,20963,21926,24088,50930,56066,58217,66102,216892	Artn,Coro1a,Ccr1,Ccr2,Csf3r,Cxadr,Cyp7b1,Edn2,Icam1,Il1b,Itgam,Itgb2,Lbp,Mmp9,Nedd9,Pecam1,Prtn3,S100a8,S100a9,Ccl3,Selp,Syk,Tnf,Tlr2,Tnfsf14,Cxcl11,Trem1,Cxcl16,Spns2	29/247
7_Member	GO Biological Processes	GO:1990266	neutrophil migration	-7.46896	-5.23648	12986,13052,13615,16176,16409,16414,16803,18613,19152,20201,20202,20302,20963,24088,56066,58217	Csf3r,Cxadr,Edn2,Il1b,Itgam,Itgb2,Lbp,Pecam1,Prtn3,S100a8,S100a9,Ccl3,Syk,Tlr2,Cxcl11,Trem1	16/91
7_Member	GO Biological Processes	GO:0030595	leukocyte chemotaxis	-7.25597	-5.0623	12721,12768,12772,12986,13052,13123,13615,16176,16409,16414,16803,17395,20201,20202,20302,20963,50930,56066,58217,66102	Coro1a,Ccr1,Ccr2,Csf3r,Cxadr,Cyp7b1,Edn2,Il1b,Itgam,Itgb2,Lbp,Mmp9,S100a8,S100a9,Ccl3,Syk,Tnfsf14,Cxcl11,Trem1,Cxcl16	20/146
7_Member	GO Biological Processes	GO:0097530	granulocyte migration	-6.75043	-4.62529	12986,13052,13615,16176,16409,16414,16803,18613,19152,20201,20202,20302,20963,24088,56066,58217	Csf3r,Cxadr,Edn2,Il1b,Itgam,Itgb2,Lbp,Pecam1,Prtn3,S100a8,S100a9,Ccl3,Syk,Tlr2,Cxcl11,Trem1	16/102
7_Member	GO Biological Processes	GO:0030593	neutrophil chemotaxis	-6.04118	-4.01724	12986,13052,13615,16176,16409,16414,16803,20201,20202,20302,20963,56066,58217	Csf3r,Cxadr,Edn2,Il1b,Itgam,Itgb2,Lbp,S100a8,S100a9,Ccl3,Syk,Cxcl11,Trem1	13/76
7_Member	GO Biological Processes	GO:0097529	myeloid leukocyte migration	-5.95011	-3.9411	12772,12986,13052,13615,16176,16409,16414,16803,17395,18613,19152,20201,20202,20302,20963,24088,56066,58217	Ccr2,Csf3r,Cxadr,Edn2,Il1b,Itgam,Itgb2,Lbp,Mmp9,Pecam1,Prtn3,S100a8,S100a9,Ccl3,Syk,Tlr2,Cxcl11,Trem1	18/145
7_Member	GO Biological Processes	GO:0071621	granulocyte chemotaxis	-5.59204	-3.63768	12986,13052,13615,16176,16409,16414,16803,20201,20202,20302,20963,56066,58217	Csf3r,Cxadr,Edn2,Il1b,Itgam,Itgb2,Lbp,S100a8,S100a9,Ccl3,Syk,Cxcl11,Trem1	13/83
8_Summary	GO Biological Processes	GO:0008285	negative regulation of cell population proliferation	-11.698	-8.99249	12006,12062,12156,12159,12162,12399,12505,12519,12554,12562,12571,12606,12778,13052,13642,14114,14283,14623,14727,14728,14960,16175,16176,16600,17260,17395,18018,18133,18162,19206,19252,19283,20319,20379,20423,21808,21926,21929,22062,22177,22337,22410,22436,24088,26971,27049,54200,54485,54612,55948,56312,57277,58208,58801,60533,66214,74048,93695,100342,210530,223650,232441,240725,329278,434215	Axin2,Bdkrb2,Bmp2,Bmp4,Bmp7,Runx3,Cd44,Cd80,Cdh13,Cdh5,Cdk6,Cebpa,Ackr3,Cxadr,Efnb2,Fbln1,Fosl1,Gjb6,Lilrb4b,Lilrb4a,H2-Aa,Il1a,Il1b,Klf4,Mef2c,Mmp9,Nfatc1,Ccn3,Npr3,Ptch1,Dusp1,Ptprz1,Sfrp2,Sfrp4,Shh,Tgfb2,Tnf,Tnfaip3,Trp73,Tyrobp,Vdr,Wnt10b,Xdh,Tlr2,Pla2g2f,Etv3,Sult2b1,Dll4,Sfrp5,Sfn,Nupr1,Slurp1,Bcl11b,Pmaip1,Cd274,Rgcc,Vsir,Gpnmb,Tent5b,P3h2,Eppk1,Rerg,Sulf1,Tnn,Lrrc32	65/-
8_Member	GO Biological Processes	GO:0008285	negative regulation of cell population proliferation	-11.698	-8.99249	12006,12062,12156,12159,12162,12399,12505,12519,12554,12562,12571,12606,12778,13052,13642,14114,14283,14623,14727,14728,14960,16175,16176,16600,17260,17395,18018,18133,18162,19206,19252,19283,20319,20379,20423,21808,21926,21929,22062,22177,22337,22410,22436,24088,26971,27049,54200,54485,54612,55948,56312,57277,58208,58801,60533,66214,74048,93695,100342,210530,223650,232441,240725,329278,434215	Axin2,Bdkrb2,Bmp2,Bmp4,Bmp7,Runx3,Cd44,Cd80,Cdh13,Cdh5,Cdk6,Cebpa,Ackr3,Cxadr,Efnb2,Fbln1,Fosl1,Gjb6,Lilrb4b,Lilrb4a,H2-Aa,Il1a,Il1b,Klf4,Mef2c,Mmp9,Nfatc1,Ccn3,Npr3,Ptch1,Dusp1,Ptprz1,Sfrp2,Sfrp4,Shh,Tgfb2,Tnf,Tnfaip3,Trp73,Tyrobp,Vdr,Wnt10b,Xdh,Tlr2,Pla2g2f,Etv3,Sult2b1,Dll4,Sfrp5,Sfn,Nupr1,Slurp1,Bcl11b,Pmaip1,Cd274,Rgcc,Vsir,Gpnmb,Tent5b,P3h2,Eppk1,Rerg,Sulf1,Tnn,Lrrc32	65/772
9_Summary	GO Biological Processes	GO:0030856	regulation of epithelial cell differentiation	-11.6146	-8.92148	12156,12159,12161,12162,12562,14313,15901,16175,16176,16673,16680,17300,17395,18755,19206,19207,20379,21808,21926,22061,22062,22337,22410,22436,54200,55948,74591,223650,16681,21938,16450	Bmp2,Bmp4,Bmp6,Bmp7,Cdh5,Fst,Id1,Il1a,Il1b,Krt36,Krt84,Foxc1,Mmp9,Prkch,Ptch1,Ptch2,Sfrp4,Tgfb2,Tnf,Trp63,Trp73,Vdr,Wnt10b,Xdh,Sult2b1,Sfn,Abca12,Eppk1,Krt2,Tnfrsf1b,Jag2	31/-
9_Member	GO Biological Processes	GO:0030856	regulation of epithelial cell differentiation	-11.6146	-8.92148	12156,12159,12161,12162,12562,14313,15901,16175,16176,16673,16680,17300,17395,18755,19206,19207,20379,21808,21926,22061,22062,22337,22410,22436,54200,55948,74591,223650	Bmp2,Bmp4,Bmp6,Bmp7,Cdh5,Fst,Id1,Il1a,Il1b,Krt36,Krt84,Foxc1,Mmp9,Prkch,Ptch1,Ptch2,Sfrp4,Tgfb2,Tnf,Trp63,Trp73,Vdr,Wnt10b,Xdh,Sult2b1,Sfn,Abca12,Eppk1	28/174
9_Member	GO Biological Processes	GO:0045682	regulation of epidermis development	-8.84126	-6.43673	12159,16673,16680,16681,17300,18755,19206,19207,20379,21808,22061,22337,54200,55948,74591	Bmp4,Krt36,Krt84,Krt2,Foxc1,Prkch,Ptch1,Ptch2,Sfrp4,Tgfb2,Trp63,Vdr,Sult2b1,Sfn,Abca12	15/64
9_Member	GO Biological Processes	GO:0045604	regulation of epidermal cell differentiation	-8.57971	-6.21404	12159,16673,16680,17300,18755,19206,19207,20379,21808,22061,22337,54200,55948,74591	Bmp4,Krt36,Krt84,Foxc1,Prkch,Ptch1,Ptch2,Sfrp4,Tgfb2,Trp63,Vdr,Sult2b1,Sfn,Abca12	14/57
9_Member	GO Biological Processes	GO:0045684	positive regulation of epidermis development	-8.39894	-6.06137	12159,16681,17300,18755,19206,19207,20379,22337,54200,55948	Bmp4,Krt2,Foxc1,Prkch,Ptch1,Ptch2,Sfrp4,Vdr,Sult2b1,Sfn	10/26
9_Member	GO Biological Processes	GO:0045606	positive regulation of epidermal cell differentiation	-7.89291	-5.60418	12159,17300,18755,19206,19207,20379,22337,54200,55948	Bmp4,Foxc1,Prkch,Ptch1,Ptch2,Sfrp4,Vdr,Sult2b1,Sfn	9/22
9_Member	GO Biological Processes	GO:0030858	positive regulation of epithelial cell differentiation	-7.87705	-5.59292	12156,12159,12161,12162,17300,18755,19206,19207,20379,22062,22337,22410,54200,55948	Bmp2,Bmp4,Bmp6,Bmp7,Foxc1,Prkch,Ptch1,Ptch2,Sfrp4,Trp73,Vdr,Wnt10b,Sult2b1,Sfn	14/64
9_Member	GO Biological Processes	GO:0045616	regulation of keratinocyte differentiation	-4.99672	-3.13245	16673,16680,17300,18755,21808,22061,22337,74591	Krt36,Krt84,Foxc1,Prkch,Tgfb2,Trp63,Vdr,Abca12	8/34
9_Member	GO Biological Processes	GO:1902337	regulation of apoptotic process involved in morphogenesis	-4.09223	-2.39504	12162,17300,21808,21938,22337	Bmp7,Foxc1,Tgfb2,Tnfrsf1b,Vdr	5/15
9_Member	GO Biological Processes	GO:1904748	regulation of apoptotic process involved in development	-3.94122	-2.27042	12162,17300,21808,21938,22337	Bmp7,Foxc1,Tgfb2,Tnfrsf1b,Vdr	5/16
9_Member	GO Biological Processes	GO:0060561	apoptotic process involved in morphogenesis	-2.15861	-0.893267	12162,16450,17300,22337	Bmp7,Jag2,Foxc1,Vdr	4/24
9_Member	GO Biological Processes	GO:0045618	positive regulation of keratinocyte differentiation	-2.1187	-0.863734	17300,18755,22337	Foxc1,Prkch,Vdr	3/13
10_Summary	GO Biological Processes	GO:0050678	regulation of epithelial cell proliferation	-11.4511	-8.79129	12159,12161,12173,12393,12399,12554,12571,13052,13123,13642,13655,14343,14632,15586,15901,16542,17260,17381,18018,19206,20319,20423,21808,21846,21926,21929,22061,22337,22410,22436,26903,54485,55948,56213,56312,57277,58208,66214,67122,76905,223650,240725,257632,353310,384783	Bmp4,Bmp6,Bnc1,Runx2,Runx3,Cdh13,Cdk6,Cxadr,Cyp7b1,Efnb2,Egr3,Fut1,Gli1,Hyal1,Id1,Kdr,Mef2c,Mmp12,Nfatc1,Ptch1,Sfrp2,Shh,Tgfb2,Tie1,Tnf,Tnfaip3,Trp63,Vdr,Wnt10b,Xdh,Dysf,Dll4,Sfn,Htra1,Nupr1,Slurp1,Bcl11b,Rgcc,Nrarp,Lrg1,Eppk1,Sulf1,Nod2,Zfp703,Irs2	45/-
10_Member	GO Biological Processes	GO:0050678	regulation of epithelial cell proliferation	-11.4511	-8.79129	12159,12161,12173,12393,12399,12554,12571,13052,13123,13642,13655,14343,14632,15586,15901,16542,17260,17381,18018,19206,20319,20423,21808,21846,21926,21929,22061,22337,22410,22436,26903,54485,55948,56213,56312,57277,58208,66214,67122,76905,223650,240725,257632,353310,384783	Bmp4,Bmp6,Bnc1,Runx2,Runx3,Cdh13,Cdk6,Cxadr,Cyp7b1,Efnb2,Egr3,Fut1,Gli1,Hyal1,Id1,Kdr,Mef2c,Mmp12,Nfatc1,Ptch1,Sfrp2,Shh,Tgfb2,Tie1,Tnf,Tnfaip3,Trp63,Vdr,Wnt10b,Xdh,Dysf,Dll4,Sfn,Htra1,Nupr1,Slurp1,Bcl11b,Rgcc,Nrarp,Lrg1,Eppk1,Sulf1,Nod2,Zfp703,Irs2	45/426
10_Member	GO Biological Processes	GO:0050679	positive regulation of epithelial cell proliferation	-6.12012	-4.0731	12159,12161,12173,12393,12554,13052,13123,13655,15586,15901,16542,17381,20423,21926,21929,22061,26903,56213,67122,76905,223650,257632,353310,384783	Bmp4,Bmp6,Bnc1,Runx2,Cdh13,Cxadr,Cyp7b1,Egr3,Hyal1,Id1,Kdr,Mmp12,Shh,Tnf,Tnfaip3,Trp63,Dysf,Htra1,Nrarp,Lrg1,Eppk1,Nod2,Zfp703,Irs2	24/235
10_Member	GO Biological Processes	GO:0001936	regulation of endothelial cell proliferation	-4.41092	-2.64912	12159,12161,12554,13655,14343,16542,17260,21846,21926,22436,26903,54485,66214,67122,76905,240725	Bmp4,Bmp6,Cdh13,Egr3,Fut1,Kdr,Mef2c,Tie1,Tnf,Xdh,Dysf,Dll4,Rgcc,Nrarp,Lrg1,Sulf1	16/153
11_Summary	KEGG Pathway	mmu04060	Cytokine-cytokine receptor interaction - Mus musculus (house mouse)	-10.4598	-7.86075	12156,12159,12161,12162,12768,12772,12773,12778,12983,12984,12986,13608,16154,16175,16176,16181,16186,16190,18383,18413,20302,21808,21926,21938,21950,24099,50930,54448,54450,56066,56708,66102,83430,252837,320100,12606,13615,14081,14283,14727,14728,17300,18035,18725,18733,20963,54199,56613,80859,170720,213002,246746,15511,16818,19283,22152,22186,26410,93834,193740,384783	Bmp2,Bmp4,Bmp6,Bmp7,Ccr1,Ccr2,Ccr4,Ackr3,Csf2rb,Csf2rb2,Csf3r,Edar,Il10ra,Il1a,Il1b,Il1rn,Il2rg,Il4ra,Tnfrsf11b,Osm,Ccl3,Tgfb2,Tnf,Tnfrsf1b,Tnfsf9,Tnfsf13b,Tnfsf14,Il36a,Il36rn,Cxcl11,Clcf1,Cxcl16,Il23a,Ackr4,Relt,Cebpa,Edn2,Acsl1,Fosl1,Lilrb4b,Lilrb4a,Foxc1,Nfkbia,Pira2,Pirb,Syk,Ccrl2,Rps6ka4,Nfkbiz,Card14,Ifitm6,Cd300lf,Hspa1b,Lck,Ptprz1,Tubb3,Uba52,Map3k8,Peli2,Hspa1a,Irs2	61/-
11_Member	KEGG Pathway	mmu04060	Cytokine-cytokine receptor interaction - Mus musculus (house mouse)	-10.4598	-7.86075	12156,12159,12161,12162,12768,12772,12773,12778,12983,12984,12986,13608,16154,16175,16176,16181,16186,16190,18383,18413,20302,21808,21926,21938,21950,24099,50930,54448,54450,56066,56708,66102,83430,252837,320100	Bmp2,Bmp4,Bmp6,Bmp7,Ccr1,Ccr2,Ccr4,Ackr3,Csf2rb,Csf2rb2,Csf3r,Edar,Il10ra,Il1a,Il1b,Il1rn,Il2rg,Il4ra,Tnfrsf11b,Osm,Ccl3,Tgfb2,Tnf,Tnfrsf1b,Tnfsf9,Tnfsf13b,Tnfsf14,Il36a,Il36rn,Cxcl11,Clcf1,Cxcl16,Il23a,Ackr4,Relt	35/294
11_Member	GO Biological Processes	GO:0019221	cytokine-mediated signaling pathway	-8.62394	-6.2429	12606,12768,12772,12778,12983,12984,12986,13608,13615,14081,14283,14727,14728,16154,16175,16176,16186,16190,17300,18035,18413,18725,18733,20302,20963,21926,21938,24099,54199,54448,56066,56613,80859,170720,213002,246746	Cebpa,Ccr1,Ccr2,Ackr3,Csf2rb,Csf2rb2,Csf3r,Edar,Edn2,Acsl1,Fosl1,Lilrb4b,Lilrb4a,Il10ra,Il1a,Il1b,Il2rg,Il4ra,Foxc1,Nfkbia,Osm,Pira2,Pirb,Ccl3,Syk,Tnf,Tnfrsf1b,Tnfsf13b,Ccrl2,Il36a,Cxcl11,Rps6ka4,Nfkbiz,Card14,Ifitm6,Cd300lf	36/360
11_Member	Reactome Gene Sets	R-MMU-1280215	Cytokine Signaling in Immune system	-3.81887	-2.17584	12983,13608,15511,16154,16175,16176,16181,16186,16190,16818,18035,18383,18413,19283,20963,21926,21938,21950,22152,22186,24099,26410,50930,54448,54450,56708,83430,93834,193740,384783	Csf2rb,Edar,Hspa1b,Il10ra,Il1a,Il1b,Il1rn,Il2rg,Il4ra,Lck,Nfkbia,Tnfrsf11b,Osm,Ptprz1,Syk,Tnf,Tnfrsf1b,Tnfsf9,Tubb3,Uba52,Tnfsf13b,Map3k8,Tnfsf14,Il36a,Il36rn,Clcf1,Il23a,Peli2,Hspa1a,Irs2	30/447
11_Member	Reactome Gene Sets	R-MMU-449147	Signaling by Interleukins	-3.34417	-1.79999	12983,16154,16175,16176,16181,16186,16190,16818,18035,18413,19283,20963,22186,26410,54448,54450,56708,83430,93834,384783	Csf2rb,Il10ra,Il1a,Il1b,Il1rn,Il2rg,Il4ra,Lck,Nfkbia,Osm,Ptprz1,Syk,Uba52,Map3k8,Il36a,Il36rn,Clcf1,Il23a,Peli2,Irs2	20/266
12_Summary	GO Biological Processes	GO:0022408	negative regulation of cell-cell adhesion	-10.4219	-7.83216	11898,12156,12159,12161,12399,12505,12519,14727,14728,14960,15507,16181,16190,16600,20423,21929,26971,60533,63873,66214,67122,74048,74591,93695,140474,230738,243910,353310,386463,434215,100039795,12554,14114,17381,19252,19264,19283,223881,12571,12606,12768,12772,14191,16365,17174,18133,18383,18725,18733,21808,21926,21946,22177,54483,65963,67742,68027,83490,227326,246746,257632,435653,12006,12162,…	Ass1,Bmp2,Bmp4,Bmp6,Runx3,Cd44,Cd80,Lilrb4b,Lilrb4a,H2-Aa,Hspb1,Il1rn,Il4ra,Klf4,Shh,Tnfaip3,Pla2g2f,Cd274,Trpv4,Rgcc,Nrarp,Vsir,Abca12,Gpnmb,Muc4,Zc3h12a,Nfkbid,Zfp703,Cdsn,Lrrc32,Ildr2,Cdh13,Fbln1,Mmp12,Dusp1,Ptprc,Ptprz1,Rnd1,Cdk6,Cebpa,Ccr1,Ccr2,Fgr,Acod1,Masp1,Ccn3,Tnfrsf11b,Pira2,Pirb,Tgfb2,Tnf,Pglyrp1,Tyrobp,Mefv,Tmem176b,Samsn1,Tmem178,Pik3ap1,Gpr55,Cd300lf,Nod2,Fcrlb,Axin2,Bmp7,Bcl11a,Fs…	93/-
12_Member	GO Biological Processes	GO:0022408	negative regulation of cell-cell adhesion	-10.4219	-7.83216	11898,12156,12159,12161,12399,12505,12519,14727,14728,14960,15507,16181,16190,16600,20423,21929,26971,60533,63873,66214,67122,74048,74591,93695,140474,230738,243910,353310,386463,434215,100039795	Ass1,Bmp2,Bmp4,Bmp6,Runx3,Cd44,Cd80,Lilrb4b,Lilrb4a,H2-Aa,Hspb1,Il1rn,Il4ra,Klf4,Shh,Tnfaip3,Pla2g2f,Cd274,Trpv4,Rgcc,Nrarp,Vsir,Abca12,Gpnmb,Muc4,Zc3h12a,Nfkbid,Zfp703,Cdsn,Lrrc32,Ildr2	31/236
12_Member	GO Biological Processes	GO:0007162	negative regulation of cell adhesion	-10.4013	-7.82071	11898,12156,12159,12161,12399,12505,12519,12554,14114,14727,14728,14960,15507,16181,16190,16600,17381,19252,19264,19283,20423,21929,26971,60533,63873,66214,67122,74048,74591,93695,140474,223881,230738,243910,353310,386463,434215,100039795	Ass1,Bmp2,Bmp4,Bmp6,Runx3,Cd44,Cd80,Cdh13,Fbln1,Lilrb4b,Lilrb4a,H2-Aa,Hspb1,Il1rn,Il4ra,Klf4,Mmp12,Dusp1,Ptprc,Ptprz1,Shh,Tnfaip3,Pla2g2f,Cd274,Trpv4,Rgcc,Nrarp,Vsir,Abca12,Gpnmb,Muc4,Rnd1,Zc3h12a,Nfkbid,Zfp703,Cdsn,Lrrc32,Ildr2	38/342
12_Member	GO Biological Processes	GO:0002683	negative regulation of immune system process	-8.5796	-6.21404	12159,12399,12505,12519,12571,12606,12768,12772,14191,14727,14728,14960,15507,16190,16365,17174,17381,18133,18383,18725,18733,19252,19264,20423,21808,21926,21929,21946,22177,26971,54483,60533,65963,67122,67742,68027,74048,83490,93695,140474,227326,230738,243910,246746,257632,434215,435653,100039795	Bmp4,Runx3,Cd44,Cd80,Cdk6,Cebpa,Ccr1,Ccr2,Fgr,Lilrb4b,Lilrb4a,H2-Aa,Hspb1,Il4ra,Acod1,Masp1,Mmp12,Ccn3,Tnfrsf11b,Pira2,Pirb,Dusp1,Ptprc,Shh,Tgfb2,Tnf,Tnfaip3,Pglyrp1,Tyrobp,Pla2g2f,Mefv,Cd274,Tmem176b,Nrarp,Samsn1,Tmem178,Vsir,Pik3ap1,Gpnmb,Muc4,Gpr55,Zc3h12a,Nfkbid,Cd300lf,Nod2,Lrrc32,Fcrlb,Ildr2	48/577
12_Member	GO Biological Processes	GO:1903707	negative regulation of hemopoiesis	-8.0716	-5.75914	12159,12399,12505,12571,12606,14727,14728,15507,16190,18383,18725,18733,20423,21946,65963,67122,68027,227326,230738,243910	Bmp4,Runx3,Cd44,Cdk6,Cebpa,Lilrb4b,Lilrb4a,Hspb1,Il4ra,Tnfrsf11b,Pira2,Pirb,Shh,Pglyrp1,Tmem176b,Nrarp,Tmem178,Gpr55,Zc3h12a,Nfkbid	20/131
12_Member	GO Biological Processes	GO:1902106	negative regulation of leukocyte differentiation	-7.66782	-5.40596	12159,12399,12505,12571,14727,14728,15507,16190,18383,18725,18733,20423,21946,65963,67122,68027,227326,230738,243910	Bmp4,Runx3,Cd44,Cdk6,Lilrb4b,Lilrb4a,Hspb1,Il4ra,Tnfrsf11b,Pira2,Pirb,Shh,Pglyrp1,Tmem176b,Nrarp,Tmem178,Gpr55,Zc3h12a,Nfkbid	19/125
12_Member	GO Biological Processes	GO:0045596	negative regulation of cell differentiation	-7.62445	-5.36692	12006,12156,12159,12162,12399,12505,12571,12606,14025,14313,14727,14728,15507,15901,16175,16176,16190,16909,17395,18018,18024,18035,18133,18383,18725,18733,19206,20319,20348,20359,20423,21808,21926,21946,22061,22062,22410,22436,63873,65079,65963,66042,67122,68027,74318,74645,210719,227326,228357,229323,230738,240514,243910,320027,329278	Axin2,Bmp2,Bmp4,Bmp7,Runx3,Cd44,Cdk6,Cebpa,Bcl11a,Fst,Lilrb4b,Lilrb4a,Hspb1,Id1,Il1a,Il1b,Il4ra,Lmo2,Mmp9,Nfatc1,Nfe2l2,Nfkbia,Ccn3,Tnfrsf11b,Pira2,Pirb,Ptch1,Sfrp2,Sema3c,Sema6b,Shh,Tgfb2,Tnf,Pglyrp1,Trp63,Trp73,Wnt10b,Xdh,Trpv4,Rtn4r,Tmem176b,Sostdc1,Nrarp,Tmem178,Hopx,Tent5c,Mkx,Gpr55,Lrp4,Gpr171,Zc3h12a,Ccdc85b,Nfkbid,Fstl4,Tnn	55/759
12_Member	GO Biological Processes	GO:0051250	negative regulation of lymphocyte activation	-7.51986	-5.28331	12159,12399,12505,12519,14191,14727,14728,14960,15507,16190,20423,21929,21946,22177,26971,60533,67122,67742,74048,93695,230738,243910,434215,100039795	Bmp4,Runx3,Cd44,Cd80,Fgr,Lilrb4b,Lilrb4a,H2-Aa,Hspb1,Il4ra,Shh,Tnfaip3,Pglyrp1,Tyrobp,Pla2g2f,Cd274,Nrarp,Samsn1,Vsir,Gpnmb,Zc3h12a,Nfkbid,Lrrc32,Ildr2	24/198
12_Member	GO Biological Processes	GO:0002695	negative regulation of leukocyte activation	-7.16755	-4.98124	12159,12399,12505,12519,14191,14727,14728,14960,15507,16190,20423,21929,21946,22177,26971,60533,67122,67742,74048,93695,230738,243910,246746,434215,100039795	Bmp4,Runx3,Cd44,Cd80,Fgr,Lilrb4b,Lilrb4a,H2-Aa,Hspb1,Il4ra,Shh,Tnfaip3,Pglyrp1,Tyrobp,Pla2g2f,Cd274,Nrarp,Samsn1,Vsir,Gpnmb,Zc3h12a,Nfkbid,Cd300lf,Lrrc32,Ildr2	25/222
12_Member	GO Biological Processes	GO:0050866	negative regulation of cell activation	-7.0147	-4.85523	12159,12399,12505,12519,14191,14727,14728,14960,15507,16190,18590,20423,21929,21946,22177,26971,60533,67122,67742,74048,93695,230738,243910,246746,434215,100039795	Bmp4,Runx3,Cd44,Cd80,Fgr,Lilrb4b,Lilrb4a,H2-Aa,Hspb1,Il4ra,Pdgfa,Shh,Tnfaip3,Pglyrp1,Tyrobp,Pla2g2f,Cd274,Nrarp,Samsn1,Vsir,Gpnmb,Zc3h12a,Nfkbid,Cd300lf,Lrrc32,Ildr2	26/242
12_Member	GO Biological Processes	GO:0010721	negative regulation of cell development	-6.49602	-4.39252	12159,12162,12399,12505,12571,12606,14025,14727,14728,15507,15901,16175,16176,16190,18383,18725,18733,20348,20359,20423,21946,65079,65963,67122,68027,227326,228357,230738,243910,320027	Bmp4,Bmp7,Runx3,Cd44,Cdk6,Cebpa,Bcl11a,Lilrb4b,Lilrb4a,Hspb1,Id1,Il1a,Il1b,Il4ra,Tnfrsf11b,Pira2,Pirb,Sema3c,Sema6b,Shh,Pglyrp1,Rtn4r,Tmem176b,Nrarp,Tmem178,Gpr55,Lrp4,Zc3h12a,Nfkbid,Fstl4	30/326
12_Member	GO Biological Processes	GO:1903038	negative regulation of leukocyte cell-cell adhesion	-6.41881	-4.3319	11898,12159,12399,12505,12519,14727,14728,14960,15507,16190,16600,20423,26971,60533,67122,74048,93695,230738,243910,434215,100039795	Ass1,Bmp4,Runx3,Cd44,Cd80,Lilrb4b,Lilrb4a,H2-Aa,Hspb1,Il4ra,Klf4,Shh,Pla2g2f,Cd274,Nrarp,Vsir,Gpnmb,Zc3h12a,Nfkbid,Lrrc32,Ildr2	21/179
12_Member	GO Biological Processes	GO:0045620	negative regulation of lymphocyte differentiation	-6.06628	-4.03487	12159,12399,12505,14727,14728,15507,16190,20423,21946,67122,230738,243910	Bmp4,Runx3,Cd44,Lilrb4b,Lilrb4a,Hspb1,Il4ra,Shh,Pglyrp1,Nrarp,Zc3h12a,Nfkbid	12/64
12_Member	GO Biological Processes	GO:0045581	negative regulation of T cell differentiation	-5.90223	-3.90044	12159,12399,12505,14727,14728,15507,16190,20423,67122,230738,243910	Bmp4,Runx3,Cd44,Lilrb4b,Lilrb4a,Hspb1,Il4ra,Shh,Nrarp,Zc3h12a,Nfkbid	11/55
12_Member	GO Biological Processes	GO:0050868	negative regulation of T cell activation	-5.86545	-3.86841	12159,12399,12505,12519,14727,14728,14960,15507,16190,20423,26971,60533,67122,74048,93695,230738,243910,434215,100039795	Bmp4,Runx3,Cd44,Cd80,Lilrb4b,Lilrb4a,H2-Aa,Hspb1,Il4ra,Shh,Pla2g2f,Cd274,Nrarp,Vsir,Gpnmb,Zc3h12a,Nfkbid,Lrrc32,Ildr2	19/162
12_Member	GO Biological Processes	GO:0050672	negative regulation of lymphocyte proliferation	-3.84894	-2.20303	12159,12505,12519,14727,14728,14960,20423,22177,26971,60533,74048,93695,434215	Bmp4,Cd44,Cd80,Lilrb4b,Lilrb4a,H2-Aa,Shh,Tyrobp,Pla2g2f,Cd274,Vsir,Gpnmb,Lrrc32	13/120
12_Member	GO Biological Processes	GO:0042130	negative regulation of T cell proliferation	-3.81756	-2.17584	12159,12505,12519,14727,14728,14960,20423,26971,60533,74048,93695,434215	Bmp4,Cd44,Cd80,Lilrb4b,Lilrb4a,H2-Aa,Shh,Pla2g2f,Cd274,Vsir,Gpnmb,Lrrc32	12/105
12_Member	GO Biological Processes	GO:0032945	negative regulation of mononuclear cell proliferation	-3.8124	-2.17275	12159,12505,12519,14727,14728,14960,20423,22177,26971,60533,74048,93695,434215	Bmp4,Cd44,Cd80,Lilrb4b,Lilrb4a,H2-Aa,Shh,Tyrobp,Pla2g2f,Cd274,Vsir,Gpnmb,Lrrc32	13/121
12_Member	GO Biological Processes	GO:0070664	negative regulation of leukocyte proliferation	-3.5681	-1.97292	12159,12505,12519,14727,14728,14960,20423,22177,26971,60533,74048,93695,434215	Bmp4,Cd44,Cd80,Lilrb4b,Lilrb4a,H2-Aa,Shh,Tyrobp,Pla2g2f,Cd274,Vsir,Gpnmb,Lrrc32	13/128
13_Summary	GO Biological Processes	GO:0007159	leukocyte cell-cell adhesion	-10.3039	-7.74102	12162,12505,12772,15894,16176,16409,16414,18613,19264,20201,20202,20344,20963,21926,23959,76905,12554,12562,12614,13052,16411,16769,16774,17064,18133,19713,20725,20861,20863,21808,22361,23964,26570,56193,56644,76884,170677,171171,233067,233765,319480,386463,408196,433016,12519,14960,18417,60533,74048,225825	Bmp7,Cd44,Ccr2,Icam1,Il1b,Itgam,Itgb2,Pecam1,Ptprc,S100a8,S100a9,Selp,Syk,Tnf,Nt5e,Lrg1,Cdh13,Cdh5,Celsr1,Cxadr,Itgax,Dsg4,Lama3,Cd93,Ccn3,Ret,Serpinb8,Stfa1,Stfa3,Tgfb2,Vnn1,Tenm2,Slc7a11,Plek,Clec7a,Cyfip2,Cdhr1,Ntng2,Lrfn3,Plekha7,Itga11,Cdsn,Csta3,Cstdc4,Cd80,H2-Aa,Cldn11,Cd274,Vsir,Cd226	50/-
13_Member	GO Biological Processes	GO:0007159	leukocyte cell-cell adhesion	-10.3039	-7.74102	12162,12505,12772,15894,16176,16409,16414,18613,19264,20201,20202,20344,20963,21926,23959,76905	Bmp7,Cd44,Ccr2,Icam1,Il1b,Itgam,Itgb2,Pecam1,Ptprc,S100a8,S100a9,Selp,Syk,Tnf,Nt5e,Lrg1	16/60
13_Member	GO Biological Processes	GO:0098609	cell-cell adhesion	-9.81742	-7.29592	12162,12505,12554,12562,12614,12772,13052,15894,16176,16409,16411,16414,16769,16774,17064,18133,18613,19264,19713,20201,20202,20344,20725,20861,20863,20963,21808,21926,22361,23959,23964,26570,56193,56644,76884,76905,170677,171171,233067,233765,319480,386463,408196,433016	Bmp7,Cd44,Cdh13,Cdh5,Celsr1,Ccr2,Cxadr,Icam1,Il1b,Itgam,Itgax,Itgb2,Dsg4,Lama3,Cd93,Ccn3,Pecam1,Ptprc,Ret,S100a8,S100a9,Selp,Serpinb8,Stfa1,Stfa3,Syk,Tgfb2,Tnf,Vnn1,Nt5e,Tenm2,Slc7a11,Plek,Clec7a,Cyfip2,Lrg1,Cdhr1,Ntng2,Lrfn3,Plekha7,Itga11,Cdsn,Csta3,Cstdc4	44/459
13_Member	KEGG Pathway	mmu04514	Cell adhesion molecules - Mus musculus (house mouse)	-2.60049	-1.22456	12519,12562,14960,15894,16409,16414,18417,18613,19264,20344,60533,74048,171171,225825	Cd80,Cdh5,H2-Aa,Icam1,Itgam,Itgb2,Cldn11,Pecam1,Ptprc,Selp,Cd274,Vsir,Ntng2,Cd226	14/182
14_Summary	KEGG Pathway	mmu04310	Wnt signaling pathway - Mus musculus (house mouse)	-9.30059	-6.81689	12006,14160,14283,17393,18018,20319,20379,21414,22409,22410,22420,24117,53627,54612,56811,72293,77583,93735,93897,207742,212398,234130,329252,407821,494504,12505,12614,13393,16600,20423,56332,66042,73016,228357,12156,14632,21929,24088,64929,66725,67122,68775,225638,240725,353310,12313,14710,22186,74325	Axin2,Lgr5,Fosl1,Mmp7,Nfatc1,Sfrp2,Sfrp4,Tcf7,Wnt10a,Wnt10b,Wnt6,Wif1,Porcn,Sfrp5,Dkk2,Nkd2,Notum,Wnt16,Fzd10,Rnf43,Frat2,Dkk4,Lgr6,Znrf3,Apcdd1,Cd44,Celsr1,Dlx3,Klf4,Shh,Amotl2,Sostdc1,Kremen2,Lrp4,Bmp2,Gli1,Tnfaip3,Tlr2,Scel,Lrrk2,Nrarp,Atp6v1c2,Alpk2,Sulf1,Zfp703,Calm1,Gngt2,Uba52,Cltb	49/-
14_Member	KEGG Pathway	mmu04310	Wnt signaling pathway - Mus musculus (house mouse)	-9.30059	-6.81689	12006,14160,14283,17393,18018,20319,20379,21414,22409,22410,22420,24117,53627,54612,56811,72293,77583,93735,93897,207742,212398,234130,329252,407821,494504	Axin2,Lgr5,Fosl1,Mmp7,Nfatc1,Sfrp2,Sfrp4,Tcf7,Wnt10a,Wnt10b,Wnt6,Wif1,Porcn,Sfrp5,Dkk2,Nkd2,Notum,Wnt16,Fzd10,Rnf43,Frat2,Dkk4,Lgr6,Znrf3,Apcdd1	25/175
14_Member	GO Biological Processes	GO:0016055	Wnt signaling pathway	-7.58634	-5.33732	12006,12505,12614,13393,16600,20319,20379,20423,21414,22409,22410,22420,24117,53627,54612,56332,56811,66042,72293,73016,77583,93735,93897,207742,212398,228357,234130,329252,407821,494504	Axin2,Cd44,Celsr1,Dlx3,Klf4,Sfrp2,Sfrp4,Shh,Tcf7,Wnt10a,Wnt10b,Wnt6,Wif1,Porcn,Sfrp5,Amotl2,Dkk2,Sostdc1,Nkd2,Kremen2,Notum,Wnt16,Fzd10,Rnf43,Frat2,Lrp4,Dkk4,Lgr6,Znrf3,Apcdd1	30/291
14_Member	GO Biological Processes	GO:0198738	cell-cell signaling by wnt	-7.58634	-5.33732	12006,12505,12614,13393,16600,20319,20379,20423,21414,22409,22410,22420,24117,53627,54612,56332,56811,66042,72293,73016,77583,93735,93897,207742,212398,228357,234130,329252,407821,494504	Axin2,Cd44,Celsr1,Dlx3,Klf4,Sfrp2,Sfrp4,Shh,Tcf7,Wnt10a,Wnt10b,Wnt6,Wif1,Porcn,Sfrp5,Amotl2,Dkk2,Sostdc1,Nkd2,Kremen2,Notum,Wnt16,Fzd10,Rnf43,Frat2,Lrp4,Dkk4,Lgr6,Znrf3,Apcdd1	30/291
14_Member	GO Biological Processes	GO:0030111	regulation of Wnt signaling pathway	-6.07922	-4.03747	12006,12156,14160,14632,20319,20379,20423,21929,22410,24088,24117,54612,56811,64929,66042,66725,67122,68775,72293,77583,207742,225638,228357,234130,240725,329252,353310,407821,494504	Axin2,Bmp2,Lgr5,Gli1,Sfrp2,Sfrp4,Shh,Tnfaip3,Wnt10b,Tlr2,Wif1,Sfrp5,Dkk2,Scel,Sostdc1,Lrrk2,Nrarp,Atp6v1c2,Nkd2,Notum,Rnf43,Alpk2,Lrp4,Dkk4,Sulf1,Lgr6,Zfp703,Znrf3,Apcdd1	29/323
14_Member	GO Biological Processes	GO:0030178	negative regulation of Wnt signaling pathway	-4.99637	-3.13245	12006,12156,14632,20319,20379,20423,24117,54612,56811,66042,72293,77583,207742,225638,228357,234130,407821,494504	Axin2,Bmp2,Gli1,Sfrp2,Sfrp4,Shh,Wif1,Sfrp5,Dkk2,Sostdc1,Nkd2,Notum,Rnf43,Alpk2,Lrp4,Dkk4,Znrf3,Apcdd1	18/169
14_Member	GO Biological Processes	GO:0030177	positive regulation of Wnt signaling pathway	-4.2231	-2.49016	12156,14160,20319,20379,20423,21929,22410,24088,56811,64929,66725,67122,68775,240725,329252	Bmp2,Lgr5,Sfrp2,Sfrp4,Shh,Tnfaip3,Wnt10b,Tlr2,Dkk2,Scel,Lrrk2,Nrarp,Atp6v1c2,Sulf1,Lgr6	15/142
14_Member	GO Biological Processes	GO:0090090	negative regulation of canonical Wnt signaling pathway	-3.86047	-2.20919	12006,12156,14632,20319,20379,20423,54612,56811,66042,72293,77583,228357,234130,407821	Axin2,Bmp2,Gli1,Sfrp2,Sfrp4,Shh,Sfrp5,Dkk2,Sostdc1,Nkd2,Notum,Lrp4,Dkk4,Znrf3	14/136
14_Member	GO Biological Processes	GO:0060828	regulation of canonical Wnt signaling pathway	-3.64928	-2.03676	12006,12156,14160,14632,20319,20379,20423,22410,54612,56811,64929,66042,66725,67122,72293,77583,228357,234130,353310,407821	Axin2,Bmp2,Lgr5,Gli1,Sfrp2,Sfrp4,Shh,Wnt10b,Sfrp5,Dkk2,Scel,Sostdc1,Lrrk2,Nrarp,Nkd2,Notum,Lrp4,Dkk4,Zfp703,Znrf3	20/252
14_Member	Reactome Gene Sets	R-MMU-195721	Signaling by WNT	-2.86887	-1.42787	12006,12313,14160,14710,21414,22186,22409,22410,22420,56811,73016,74325,93735,207742,212398,234130,407821	Axin2,Calm1,Lgr5,Gngt2,Tcf7,Uba52,Wnt10a,Wnt10b,Wnt6,Dkk2,Kremen2,Cltb,Wnt16,Rnf43,Frat2,Dkk4,Znrf3	17/229
15_Summary	GO Biological Processes	GO:0043616	keratinocyte proliferation	-9.28736	-6.81083	12554,13642,14313,16681,18018,19206,22061,55948,69462,80859,93735,259277,12159,12173,12393,13123,14160,16542,17260,18133,20423,21926,66222,67122,384783,12399,12571,20319,21808,22337,22410,22436,54485,56312,57277,66214,223650,240725,58208,76905,12006,12606,207742,407821,14114,18712,19264	Cdh13,Efnb2,Fst,Krt2,Nfatc1,Ptch1,Trp63,Sfn,Slurp2,Nfkbiz,Wnt16,Klk8,Bmp4,Bnc1,Runx2,Cyp7b1,Lgr5,Kdr,Mef2c,Ccn3,Shh,Tnf,Serpinb1a,Nrarp,Irs2,Runx3,Cdk6,Sfrp2,Tgfb2,Vdr,Wnt10b,Xdh,Dll4,Nupr1,Slurp1,Rgcc,Eppk1,Sulf1,Bcl11b,Lrg1,Axin2,Cebpa,Rnf43,Znrf3,Fbln1,Pim1,Ptprc	47/-
15_Member	GO Biological Processes	GO:0043616	keratinocyte proliferation	-9.28736	-6.81083	12554,13642,14313,16681,18018,19206,22061,55948,69462,80859,93735,259277	Cdh13,Efnb2,Fst,Krt2,Nfatc1,Ptch1,Trp63,Sfn,Slurp2,Nfkbiz,Wnt16,Klk8	12/35
15_Member	GO Biological Processes	GO:0050673	epithelial cell proliferation	-7.3237	-5.11306	12159,12173,12393,12554,13123,13642,14160,14313,16542,16681,17260,18018,18133,19206,20423,21926,22061,55948,66222,67122,69462,80859,93735,259277,384783	Bmp4,Bnc1,Runx2,Cdh13,Cyp7b1,Efnb2,Lgr5,Fst,Kdr,Krt2,Mef2c,Nfatc1,Ccn3,Ptch1,Shh,Tnf,Trp63,Sfn,Serpinb1a,Nrarp,Slurp2,Nfkbiz,Wnt16,Klk8,Irs2	25/218
15_Member	GO Biological Processes	GO:0050680	negative regulation of epithelial cell proliferation	-6.20389	-4.14886	12159,12399,12571,13642,17260,18018,19206,20319,21808,21926,22337,22410,22436,54485,55948,56312,57277,66214,223650,240725	Bmp4,Runx3,Cdk6,Efnb2,Mef2c,Nfatc1,Ptch1,Sfrp2,Tgfb2,Tnf,Vdr,Wnt10b,Xdh,Dll4,Sfn,Nupr1,Slurp1,Rgcc,Eppk1,Sulf1	20/169
15_Member	GO Biological Processes	GO:0010837	regulation of keratinocyte proliferation	-5.41795	-3.48447	13642,18018,19206,22061,22337,55948,57277,58208,76905,223650	Efnb2,Nfatc1,Ptch1,Trp63,Vdr,Sfn,Slurp1,Bcl11b,Lrg1,Eppk1	10/50
15_Member	GO Biological Processes	GO:0072089	stem cell proliferation	-4.9784	-3.12023	12006,12393,12606,16542,18018,19206,20319,20423,22061,22410,55948,207742,407821	Axin2,Runx2,Cebpa,Kdr,Nfatc1,Ptch1,Sfrp2,Shh,Trp63,Wnt10b,Sfn,Rnf43,Znrf3	13/94
15_Member	GO Biological Processes	GO:0010839	negative regulation of keratinocyte proliferation	-4.73524	-2.92209	13642,18018,19206,22337,55948,57277,223650	Efnb2,Nfatc1,Ptch1,Vdr,Sfn,Slurp1,Eppk1	7/27
15_Member	GO Biological Processes	GO:0072091	regulation of stem cell proliferation	-4.40992	-2.64912	12159,12393,12606,14114,16542,18018,18712,19206,19264,20423,22061,22410,55948	Bmp4,Runx2,Cebpa,Fbln1,Kdr,Nfatc1,Pim1,Ptch1,Ptprc,Shh,Trp63,Wnt10b,Sfn	13/106
15_Member	GO Biological Processes	GO:2000647	negative regulation of stem cell proliferation	-2.72889	-1.32469	12606,14114,18018,19206,55948	Cebpa,Fbln1,Nfatc1,Ptch1,Sfn	5/28
16_Summary	GO Biological Processes	GO:0045765	regulation of angiogenesis	-9.25571	-6.78624	11555,11826,12266,12562,12772,13058,13179,14343,15507,15586,15901,16175,16176,16411,16414,16542,16600,17300,17395,18024,18054,20319,20423,21808,21846,21926,66214,76905,223780,230738,240725,241556,329278,381290,12159,15200,17260,20855,54485,223650,384783	Adrb2,Aqp1,C3,Cdh5,Ccr2,Cybb,Dcn,Fut1,Hspb1,Hyal1,Id1,Il1a,Il1b,Itgax,Itgb2,Kdr,Klf4,Foxc1,Mmp9,Nfe2l2,Ngp,Sfrp2,Shh,Tgfb2,Tie1,Tnf,Rgcc,Lrg1,Adm2,Zc3h12a,Sulf1,Tspan18,Tnn,Atp2b4,Bmp4,Hbegf,Mef2c,Stc1,Dll4,Eppk1,Irs2	41/-
16_Member	GO Biological Processes	GO:0045765	regulation of angiogenesis	-9.25571	-6.78624	11555,11826,12266,12562,12772,13058,13179,14343,15507,15586,15901,16175,16176,16411,16414,16542,16600,17300,17395,18024,18054,20319,20423,21808,21846,21926,66214,76905,223780,230738,240725,241556,329278,381290	Adrb2,Aqp1,C3,Cdh5,Ccr2,Cybb,Dcn,Fut1,Hspb1,Hyal1,Id1,Il1a,Il1b,Itgax,Itgb2,Kdr,Klf4,Foxc1,Mmp9,Nfe2l2,Ngp,Sfrp2,Shh,Tgfb2,Tie1,Tnf,Rgcc,Lrg1,Adm2,Zc3h12a,Sulf1,Tspan18,Tnn,Atp2b4	34/309
16_Member	GO Biological Processes	GO:1901342	regulation of vasculature development	-8.99898	-6.58838	11555,11826,12266,12562,12772,13058,13179,14343,15507,15586,15901,16175,16176,16411,16414,16542,16600,17300,17395,18024,18054,20319,20423,21808,21846,21926,66214,76905,223780,230738,240725,241556,329278,381290	Adrb2,Aqp1,C3,Cdh5,Ccr2,Cybb,Dcn,Fut1,Hspb1,Hyal1,Id1,Il1a,Il1b,Itgax,Itgb2,Kdr,Klf4,Foxc1,Mmp9,Nfe2l2,Ngp,Sfrp2,Shh,Tgfb2,Tie1,Tnf,Rgcc,Lrg1,Adm2,Zc3h12a,Sulf1,Tspan18,Tnn,Atp2b4	34/316
16_Member	GO Biological Processes	GO:0045766	positive regulation of angiogenesis	-6.92479	-4.7802	11826,12266,12562,13058,14343,15507,15586,16175,16176,16411,16414,16542,16600,17395,18024,20319,20423,21846,76905,223780,230738,329278	Aqp1,C3,Cdh5,Cybb,Fut1,Hspb1,Hyal1,Il1a,Il1b,Itgax,Itgb2,Kdr,Klf4,Mmp9,Nfe2l2,Sfrp2,Shh,Tie1,Lrg1,Adm2,Zc3h12a,Tnn	22/182
16_Member	GO Biological Processes	GO:1904018	positive regulation of vasculature development	-6.79844	-4.66787	11826,12266,12562,13058,14343,15507,15586,16175,16176,16411,16414,16542,16600,17395,18024,20319,20423,21846,76905,223780,230738,329278	Aqp1,C3,Cdh5,Cybb,Fut1,Hspb1,Hyal1,Il1a,Il1b,Itgax,Itgb2,Kdr,Klf4,Mmp9,Nfe2l2,Sfrp2,Shh,Tie1,Lrg1,Adm2,Zc3h12a,Tnn	22/185
16_Member	GO Biological Processes	GO:0010632	regulation of epithelial cell migration	-4.62596	-2.82349	11826,12159,13179,14343,15200,15507,15586,16542,16600,17260,17395,18024,20423,20855,21808,21926,54485,66214,223650,230738,381290,384783	Aqp1,Bmp4,Dcn,Fut1,Hbegf,Hspb1,Hyal1,Kdr,Klf4,Mef2c,Mmp9,Nfe2l2,Shh,Stc1,Tgfb2,Tnf,Dll4,Rgcc,Eppk1,Zc3h12a,Atp2b4,Irs2	22/250
16_Member	GO Biological Processes	GO:0010594	regulation of endothelial cell migration	-3.1463	-1.64937	12159,13179,14343,15507,16542,16600,17260,18024,20423,20855,21926,54485,66214,230738,381290	Bmp4,Dcn,Fut1,Hspb1,Kdr,Klf4,Mef2c,Nfe2l2,Shh,Stc1,Tnf,Dll4,Rgcc,Zc3h12a,Atp2b4	15/178
16_Member	GO Biological Processes	GO:0010634	positive regulation of epithelial cell migration	-2.58924	-1.21668	11826,12159,14343,15200,15507,15586,16542,17395,18024,20423,21808,230738,384783	Aqp1,Bmp4,Fut1,Hbegf,Hspb1,Hyal1,Kdr,Mmp9,Nfe2l2,Shh,Tgfb2,Zc3h12a,Irs2	13/163
17_Summary	GO Biological Processes	GO:0043408	regulation of MAPK cascade	-9.22646	-6.76894	11555,12156,12159,12266,12491,12505,12768,12772,12778,13537,13608,14114,14289,14727,14728,15894,15901,16001,16175,16176,16542,16600,17260,18205,18413,18584,18590,19252,19264,19713,20302,20319,20379,20963,21808,21926,22062,22436,24088,51791,54612,56644,56708,63873,66725,67702,72373,76108,81799,93695,93735,93834,93897,227326,230738,257632,320207,327957,12006,12062,15507,18024,18950,20618,26570,2981…	Adrb2,Bmp2,Bmp4,C3,Cd36,Cd44,Ccr1,Ccr2,Ackr3,Dusp2,Edar,Fbln1,Fpr2,Lilrb4b,Lilrb4a,Icam1,Id1,Igf1r,Il1a,Il1b,Kdr,Klf4,Mef2c,Ntf3,Osm,Pde8a,Pdgfa,Dusp1,Ptprc,Ret,Ccl3,Sfrp2,Sfrp4,Syk,Tgfb2,Tnf,Trp73,Xdh,Tlr2,Rgs14,Sfrp5,Clec7a,Clcf1,Trpv4,Lrrk2,Rnf149,Psca,Rap2a,C1qtnf3,Gpnmb,Wnt16,Peli2,Fzd10,Gpr55,Zc3h12a,Nod2,Pik3r5,Scimp,Axin2,Bdkrb2,Hspb1,Nfe2l2,Pnp,Sncg,Slc7a11,Zfp385a,Bok,Nupr1,Pmaip1,Rtn4r…	71/-
17_Member	GO Biological Processes	GO:0043408	regulation of MAPK cascade	-9.22646	-6.76894	11555,12156,12159,12266,12491,12505,12768,12772,12778,13537,13608,14114,14289,14727,14728,15894,15901,16001,16175,16176,16542,16600,17260,18205,18413,18584,18590,19252,19264,19713,20302,20319,20379,20963,21808,21926,22062,22436,24088,51791,54612,56644,56708,63873,66725,67702,72373,76108,81799,93695,93735,93834,93897,227326,230738,257632,320207,327957	Adrb2,Bmp2,Bmp4,C3,Cd36,Cd44,Ccr1,Ccr2,Ackr3,Dusp2,Edar,Fbln1,Fpr2,Lilrb4b,Lilrb4a,Icam1,Id1,Igf1r,Il1a,Il1b,Kdr,Klf4,Mef2c,Ntf3,Osm,Pde8a,Pdgfa,Dusp1,Ptprc,Ret,Ccl3,Sfrp2,Sfrp4,Syk,Tgfb2,Tnf,Trp73,Xdh,Tlr2,Rgs14,Sfrp5,Clec7a,Clcf1,Trpv4,Lrrk2,Rnf149,Psca,Rap2a,C1qtnf3,Gpnmb,Wnt16,Peli2,Fzd10,Gpr55,Zc3h12a,Nod2,Pik3r5,Scimp	58/742
17_Member	GO Biological Processes	GO:0043410	positive regulation of MAPK cascade	-7.28889	-5.08394	11555,12156,12159,12266,12491,12505,12768,12772,12778,13608,14289,15894,16001,16175,16176,16542,17260,18205,18413,18584,18590,19264,19713,20302,20963,21808,21926,22062,22436,24088,56644,63873,66725,81799,93695,93735,93834,93897,227326,230738,257632,320207,327957	Adrb2,Bmp2,Bmp4,C3,Cd36,Cd44,Ccr1,Ccr2,Ackr3,Edar,Fpr2,Icam1,Igf1r,Il1a,Il1b,Kdr,Mef2c,Ntf3,Osm,Pde8a,Pdgfa,Ptprc,Ret,Ccl3,Syk,Tgfb2,Tnf,Trp73,Xdh,Tlr2,Clec7a,Trpv4,Lrrk2,C1qtnf3,Gpnmb,Wnt16,Peli2,Fzd10,Gpr55,Zc3h12a,Nod2,Pik3r5,Scimp	43/536
17_Member	GO Biological Processes	GO:0070372	regulation of ERK1 and ERK2 cascade	-6.02843	-4.00961	12156,12159,12266,12491,12505,12768,12778,14114,14289,15894,16175,16176,16542,16600,18584,18590,19252,19264,20302,20963,24088,51791,56708,63873,72373,81799,93695,227326,257632,327957	Bmp2,Bmp4,C3,Cd36,Cd44,Ccr1,Ackr3,Fbln1,Fpr2,Icam1,Il1a,Il1b,Kdr,Klf4,Pde8a,Pdgfa,Dusp1,Ptprc,Ccl3,Syk,Tlr2,Rgs14,Clcf1,Trpv4,Psca,C1qtnf3,Gpnmb,Gpr55,Nod2,Scimp	30/343
17_Member	GO Biological Processes	GO:0032872	regulation of stress-activated MAPK cascade	-5.74396	-3.76086	12156,12159,12772,13608,16001,16175,16176,19252,20319,20379,21808,21926,22436,54612,56644,63873,76108,93735,93897,230738,257632,327957	Bmp2,Bmp4,Ccr2,Edar,Igf1r,Il1a,Il1b,Dusp1,Sfrp2,Sfrp4,Tgfb2,Tnf,Xdh,Sfrp5,Clec7a,Trpv4,Rap2a,Wnt16,Fzd10,Zc3h12a,Nod2,Scimp	22/213
17_Member	GO Biological Processes	GO:0070302	regulation of stress-activated protein kinase signaling cascade	-5.60956	-3.6525	12156,12159,12772,13608,16001,16175,16176,19252,20319,20379,21808,21926,22436,54612,56644,63873,76108,93735,93897,230738,257632,327957	Bmp2,Bmp4,Ccr2,Edar,Igf1r,Il1a,Il1b,Dusp1,Sfrp2,Sfrp4,Tgfb2,Tnf,Xdh,Sfrp5,Clec7a,Trpv4,Rap2a,Wnt16,Fzd10,Zc3h12a,Nod2,Scimp	22/217
17_Member	GO Biological Processes	GO:0070374	positive regulation of ERK1 and ERK2 cascade	-5.41863	-3.48447	12156,12159,12266,12491,12505,12768,12778,14289,15894,16175,16176,16542,18584,18590,19264,20302,24088,63873,81799,93695,227326,257632,327957	Bmp2,Bmp4,C3,Cd36,Cd44,Ccr1,Ackr3,Fpr2,Icam1,Il1a,Il1b,Kdr,Pde8a,Pdgfa,Ptprc,Ccl3,Tlr2,Trpv4,C1qtnf3,Gpnmb,Gpr55,Nod2,Scimp	23/240
17_Member	GO Biological Processes	GO:0032874	positive regulation of stress-activated MAPK cascade	-4.66297	-2.85748	12156,12159,12772,13608,16175,16176,21808,21926,22436,56644,63873,93735,93897,230738,257632,327957	Bmp2,Bmp4,Ccr2,Edar,Il1a,Il1b,Tgfb2,Tnf,Xdh,Clec7a,Trpv4,Wnt16,Fzd10,Zc3h12a,Nod2,Scimp	16/146
17_Member	GO Biological Processes	GO:0070304	positive regulation of stress-activated protein kinase signaling cascade	-4.58922	-2.79275	12156,12159,12772,13608,16175,16176,21808,21926,22436,56644,63873,93735,93897,230738,257632,327957	Bmp2,Bmp4,Ccr2,Edar,Il1a,Il1b,Tgfb2,Tnf,Xdh,Clec7a,Trpv4,Wnt16,Fzd10,Zc3h12a,Nod2,Scimp	16/148
17_Member	GO Biological Processes	GO:0080135	regulation of cellular response to stress	-3.8295	-2.18465	12006,12062,12156,12159,12491,12505,12772,12778,13608,15507,16001,16175,16176,16600,18024,18950,19252,20319,20379,20618,21808,21926,22062,22436,26570,29813,51800,54612,56312,56644,58801,63873,65079,66725,67760,76108,93735,93897,230738,257632,327957	Axin2,Bdkrb2,Bmp2,Bmp4,Cd36,Cd44,Ccr2,Ackr3,Edar,Hspb1,Igf1r,Il1a,Il1b,Klf4,Nfe2l2,Pnp,Dusp1,Sfrp2,Sfrp4,Sncg,Tgfb2,Tnf,Trp73,Xdh,Slc7a11,Zfp385a,Bok,Sfrp5,Nupr1,Clec7a,Pmaip1,Trpv4,Rtn4r,Lrrk2,Slc38a2,Rap2a,Wnt16,Fzd10,Zc3h12a,Nod2,Scimp	41/689
17_Member	GO Biological Processes	GO:0046328	regulation of JNK cascade	-2.68422	-1.28569	13608,16001,16175,16176,20319,20379,21926,54612,63873,76108,93735,93897,257632	Edar,Igf1r,Il1a,Il1b,Sfrp2,Sfrp4,Tnf,Sfrp5,Trpv4,Rap2a,Wnt16,Fzd10,Nod2	13/159
18_Summary	GO Biological Processes	GO:0002819	regulation of adaptive immune response	-9.0524	-6.62306	12266,12505,12519,12772,14727,14728,16176,16190,17260,18950,19264,21926,21929,21938,24099,56620,56644,56708,60533,67742,74048,80859,83430,140474,214855,216799,225825,230738,243910,257632,12491,13421,14191,16409,16414,16803,17174,18106,20963,21808,21946,22177,23993,24088,55991,68668,327957,21950,54450,16175,108723,13608,15507,17002,17474,18035	C3,Cd44,Cd80,Ccr2,Lilrb4b,Lilrb4a,Il1b,Il4ra,Mef2c,Pnp,Ptprc,Tnf,Tnfaip3,Tnfrsf1b,Tnfsf13b,Clec4n,Clec7a,Clcf1,Cd274,Samsn1,Vsir,Nfkbiz,Il23a,Muc4,Arid5a,Nlrp3,Cd226,Zc3h12a,Nfkbid,Nod2,Cd36,Dnase1l3,Fgr,Itgam,Itgb2,Lbp,Masp1,Cd244a,Syk,Tgfb2,Pglyrp1,Tyrobp,Klk7,Tlr2,Panx1,Klk5,Scimp,Tnfsf9,Il36rn,Il1a,Card11,Edar,Hspb1,Ltf,Clec4d,Nfkbia	56/-
18_Member	GO Biological Processes	GO:0002819	regulation of adaptive immune response	-9.0524	-6.62306	12266,12505,12519,12772,14727,14728,16176,16190,17260,18950,19264,21926,21929,21938,24099,56620,56644,56708,60533,67742,74048,80859,83430,140474,214855,216799,225825,230738,243910,257632	C3,Cd44,Cd80,Ccr2,Lilrb4b,Lilrb4a,Il1b,Il4ra,Mef2c,Pnp,Ptprc,Tnf,Tnfaip3,Tnfrsf1b,Tnfsf13b,Clec4n,Clec7a,Clcf1,Cd274,Samsn1,Vsir,Nfkbiz,Il23a,Muc4,Arid5a,Nlrp3,Cd226,Zc3h12a,Nfkbid,Nod2	30/252
18_Member	GO Biological Processes	GO:0002822	regulation of adaptive immune response based on somatic recombination of immune receptors built from immunoglobulin superfamily domains	-8.45727	-6.10781	12266,12519,12772,14727,14728,16176,16190,17260,18950,19264,21926,21929,21938,24099,56620,56644,56708,60533,74048,80859,83430,140474,214855,216799,225825,230738,243910,257632	C3,Cd80,Ccr2,Lilrb4b,Lilrb4a,Il1b,Il4ra,Mef2c,Pnp,Ptprc,Tnf,Tnfaip3,Tnfrsf1b,Tnfsf13b,Clec4n,Clec7a,Clcf1,Cd274,Vsir,Nfkbiz,Il23a,Muc4,Arid5a,Nlrp3,Cd226,Zc3h12a,Nfkbid,Nod2	28/236
18_Member	GO Biological Processes	GO:0002697	regulation of immune effector process	-7.96107	-5.6677	12266,12491,12519,12772,13421,14191,14727,14728,16176,16190,16409,16414,16803,17174,18106,18950,19264,20963,21808,21926,21929,21938,21946,22177,23993,24088,55991,56644,56708,68668,74048,80859,83430,140474,214855,216799,225825,230738,243910,257632,327957	C3,Cd36,Cd80,Ccr2,Dnase1l3,Fgr,Lilrb4b,Lilrb4a,Il1b,Il4ra,Itgam,Itgb2,Lbp,Masp1,Cd244a,Pnp,Ptprc,Syk,Tgfb2,Tnf,Tnfaip3,Tnfrsf1b,Pglyrp1,Tyrobp,Klk7,Tlr2,Panx1,Clec7a,Clcf1,Klk5,Vsir,Nfkbiz,Il23a,Muc4,Arid5a,Nlrp3,Cd226,Zc3h12a,Nfkbid,Nod2,Scimp	41/471
18_Member	GO Biological Processes	GO:0002699	positive regulation of immune effector process	-6.87959	-4.74159	12266,12491,12772,14191,14728,16176,16190,16409,16414,16803,18106,18950,19264,20963,21926,22177,23993,24088,55991,56644,56708,68668,80859,83430,214855,216799,225825,243910,257632,327957	C3,Cd36,Ccr2,Fgr,Lilrb4a,Il1b,Il4ra,Itgam,Itgb2,Lbp,Cd244a,Pnp,Ptprc,Syk,Tnf,Tyrobp,Klk7,Tlr2,Panx1,Clec7a,Clcf1,Klk5,Nfkbiz,Il23a,Arid5a,Nlrp3,Cd226,Nfkbid,Nod2,Scimp	30/313
18_Member	GO Biological Processes	GO:0002703	regulation of leukocyte mediated immunity	-5.88711	-3.8877	12266,12519,12772,13421,14191,14727,14728,16176,16190,16409,16414,18950,19264,20963,21926,21938,22177,24088,56644,56708,74048,83430,140474,214855,216799,225825,257632,327957	C3,Cd80,Ccr2,Dnase1l3,Fgr,Lilrb4b,Lilrb4a,Il1b,Il4ra,Itgam,Itgb2,Pnp,Ptprc,Syk,Tnf,Tnfrsf1b,Tyrobp,Tlr2,Clec7a,Clcf1,Vsir,Il23a,Muc4,Arid5a,Nlrp3,Cd226,Nod2,Scimp	28/312
18_Member	GO Biological Processes	GO:0032649	regulation of type II interferon production	-5.74109	-3.76027	12772,14727,14728,16176,18106,21926,21946,21950,54450,56644,60533,74048,83430,214855,225825,230738,257632	Ccr2,Lilrb4b,Lilrb4a,Il1b,Cd244a,Tnf,Pglyrp1,Tnfsf9,Il36rn,Clec7a,Cd274,Vsir,Il23a,Arid5a,Cd226,Zc3h12a,Nod2	17/135
18_Member	GO Biological Processes	GO:0002821	positive regulation of adaptive immune response	-5.4361	-3.49385	12266,12505,12772,16176,18950,19264,21926,24099,56620,56644,56708,60533,80859,83430,214855,216799,225825,243910,257632	C3,Cd44,Ccr2,Il1b,Pnp,Ptprc,Tnf,Tnfsf13b,Clec4n,Clec7a,Clcf1,Cd274,Nfkbiz,Il23a,Arid5a,Nlrp3,Cd226,Nfkbid,Nod2	19/173
18_Member	GO Biological Processes	GO:0002824	positive regulation of adaptive immune response based on somatic recombination of immune receptors built from immunoglobulin superfamily domains	-5.14159	-3.2508	12266,12772,16176,18950,19264,21926,24099,56620,56644,56708,60533,80859,83430,214855,216799,225825,243910,257632	C3,Ccr2,Il1b,Pnp,Ptprc,Tnf,Tnfsf13b,Clec4n,Clec7a,Clcf1,Cd274,Nfkbiz,Il23a,Arid5a,Nlrp3,Cd226,Nfkbid,Nod2	18/165
18_Member	GO Biological Processes	GO:0032663	regulation of interleukin-2 production	-4.96062	-3.107	12772,14727,14728,16175,16176,18950,19264,21929,56644,108723,257632	Ccr2,Lilrb4b,Lilrb4a,Il1a,Il1b,Pnp,Ptprc,Tnfaip3,Clec7a,Card11,Nod2	11/68
18_Member	GO Biological Processes	GO:0002709	regulation of T cell mediated immunity	-4.41648	-2.65197	12519,12772,14727,14728,16176,18950,19264,21938,74048,83430,140474,214855,216799,257632	Cd80,Ccr2,Lilrb4b,Lilrb4a,Il1b,Pnp,Ptprc,Tnfrsf1b,Vsir,Il23a,Muc4,Arid5a,Nlrp3,Nod2	14/121
18_Member	GO Biological Processes	GO:0002724	regulation of T cell cytokine production	-4.05875	-2.3686	12772,14727,14728,16176,21938,74048,214855,216799	Ccr2,Lilrb4b,Lilrb4a,Il1b,Tnfrsf1b,Vsir,Arid5a,Nlrp3	8/45
18_Member	GO Biological Processes	GO:0032743	positive regulation of interleukin-2 production	-3.50296	-1.92325	12772,16175,16176,18950,19264,56644,108723	Ccr2,Il1a,Il1b,Pnp,Ptprc,Clec7a,Card11	7/41
18_Member	GO Biological Processes	GO:0002705	positive regulation of leukocyte mediated immunity	-3.16697	-1.66629	12266,16176,16409,16414,18950,19264,21926,22177,56644,56708,83430,214855,216799,225825,257632,327957	C3,Il1b,Itgam,Itgb2,Pnp,Ptprc,Tnf,Tyrobp,Clec7a,Clcf1,Il23a,Arid5a,Nlrp3,Cd226,Nod2,Scimp	16/196
18_Member	GO Biological Processes	GO:0043122	regulation of canonical NF-kappaB signal transduction	-3.16112	-1.66119	12491,13608,14727,14728,15507,16175,16176,17002,17474,18035,21926,21929,56620,56644,108723,230738,243910,257632	Cd36,Edar,Lilrb4b,Lilrb4a,Hspb1,Il1a,Il1b,Ltf,Clec4d,Nfkbia,Tnf,Tnfaip3,Clec4n,Clec7a,Card11,Zc3h12a,Nfkbid,Nod2	18/235
18_Member	GO Biological Processes	GO:0002706	regulation of lymphocyte mediated immunity	-3.05517	-1.57793	12266,12519,12772,14727,14728,16176,18950,19264,21926,21938,56708,74048,83430,140474,214855,216799,225825,257632	C3,Cd80,Ccr2,Lilrb4b,Lilrb4a,Il1b,Pnp,Ptprc,Tnf,Tnfrsf1b,Clcf1,Vsir,Il23a,Muc4,Arid5a,Nlrp3,Cd226,Nod2	18/240
18_Member	GO Biological Processes	GO:0032729	positive regulation of type II interferon production	-2.43245	-1.09642	12772,16176,18106,21926,21950,56644,83430,214855,225825	Ccr2,Il1b,Cd244a,Tnf,Tnfsf9,Clec7a,Il23a,Arid5a,Cd226	9/95
19_Summary	KEGG Pathway	mmu05152	Tuberculosis - Mus musculus (house mouse)	-9.03813	-6.61512	12266,12313,12721,12795,13033,14960,16154,16175,16176,16409,16411,16414,16803,20963,21808,21926,22337,24088,56619,56644,70405,80796,83430,140494,257632,11898,12159,12562,15894,16542,17260,17395,18024,18590,18613,19252,63873,12268,216799,12491,13058,15511,17972,18018,18035,18988,20302,20344,193740	C3,Calm1,Coro1a,Plk3,Ctsd,H2-Aa,Il10ra,Il1a,Il1b,Itgam,Itgax,Itgb2,Lbp,Syk,Tgfb2,Tnf,Vdr,Tlr2,Clec4e,Clec7a,Calml3,Calm4,Il23a,Atp6v0a4,Nod2,Ass1,Bmp4,Cdh5,Icam1,Kdr,Mef2c,Mmp9,Nfe2l2,Pdgfa,Pecam1,Dusp1,Trpv4,C4b,Nlrp3,Cd36,Cybb,Hspa1b,Ncf4,Nfatc1,Nfkbia,Pou2f3,Ccl3,Selp,Hspa1a	49/-
19_Member	KEGG Pathway	mmu05152	Tuberculosis - Mus musculus (house mouse)	-9.03813	-6.61512	12266,12313,12721,12795,13033,14960,16154,16175,16176,16409,16411,16414,16803,20963,21808,21926,22337,24088,56619,56644,70405,80796,83430,140494,257632	C3,Calm1,Coro1a,Plk3,Ctsd,H2-Aa,Il10ra,Il1a,Il1b,Itgam,Itgax,Itgb2,Lbp,Syk,Tgfb2,Tnf,Vdr,Tlr2,Clec4e,Clec7a,Calml3,Calm4,Il23a,Atp6v0a4,Nod2	25/180
19_Member	KEGG Pathway	mmu05418	Fluid shear stress and atherosclerosis - Mus musculus (house mouse)	-5.86243	-3.86774	11898,12159,12313,12562,15894,16175,16176,16542,17260,17395,18024,18590,18613,19252,21926,63873,70405,80796	Ass1,Bmp4,Calm1,Cdh5,Icam1,Il1a,Il1b,Kdr,Mef2c,Mmp9,Nfe2l2,Pdgfa,Pecam1,Dusp1,Tnf,Trpv4,Calml3,Calm4	18/147
19_Member	KEGG Pathway	mmu05133	Pertussis - Mus musculus (house mouse)	-5.18447	-3.28055	12266,12268,12313,16175,16176,16409,16414,21926,70405,80796,83430,216799	C3,C4b,Calm1,Il1a,Il1b,Itgam,Itgb2,Tnf,Calml3,Calm4,Il23a,Nlrp3	12/77
19_Member	KEGG Pathway	mmu05417	Lipid and atherosclerosis - Mus musculus (house mouse)	-5.09792	-3.21446	12313,12491,13058,15511,15894,16176,16803,17395,17972,18018,18024,18035,18988,20302,20344,21926,24088,70405,80796,193740,216799	Calm1,Cd36,Cybb,Hspa1b,Icam1,Il1b,Lbp,Mmp9,Ncf4,Nfatc1,Nfe2l2,Nfkbia,Pou2f3,Ccl3,Selp,Tnf,Tlr2,Calml3,Calm4,Hspa1a,Nlrp3	21/216
20_Summary	GO Biological Processes	GO:0050727	regulation of inflammatory response	-8.66928	-6.27665	11690,11770,12182,12266,12505,12562,12606,12772,13032,13421,14289,16154,16176,16365,16678,16803,18035,18133,18413,20201,20202,20302,21926,21929,21938,21946,23945,23959,24088,54483,56312,56708,63873,66725,80859,81799,83490,216799,257632	Alox5ap,Fabp4,Bst1,C3,Cd44,Cdh5,Cebpa,Ccr2,Ctsc,Dnase1l3,Fpr2,Il10ra,Il1b,Acod1,Krt1,Lbp,Nfkbia,Ccn3,Osm,S100a8,S100a9,Ccl3,Tnf,Tnfaip3,Tnfrsf1b,Pglyrp1,Mgll,Nt5e,Tlr2,Mefv,Nupr1,Clcf1,Trpv4,Lrrk2,Nfkbiz,C1qtnf3,Pik3ap1,Nlrp3,Nod2	39/-
20_Member	GO Biological Processes	GO:0050727	regulation of inflammatory response	-8.66928	-6.27665	11690,11770,12182,12266,12505,12562,12606,12772,13032,13421,14289,16154,16176,16365,16678,16803,18035,18133,18413,20201,20202,20302,21926,21929,21938,21946,23945,23959,24088,54483,56312,56708,63873,66725,80859,81799,83490,216799,257632	Alox5ap,Fabp4,Bst1,C3,Cd44,Cdh5,Cebpa,Ccr2,Ctsc,Dnase1l3,Fpr2,Il10ra,Il1b,Acod1,Krt1,Lbp,Nfkbia,Ccn3,Osm,S100a8,S100a9,Ccl3,Tnf,Tnfaip3,Tnfrsf1b,Pglyrp1,Mgll,Nt5e,Tlr2,Mefv,Nupr1,Clcf1,Trpv4,Lrrk2,Nfkbiz,C1qtnf3,Pik3ap1,Nlrp3,Nod2	39/410
20_Member	GO Biological Processes	GO:0050729	positive regulation of inflammatory response	-6.93342	-4.7855	11690,11770,12266,12606,12772,13032,16176,16803,18035,18413,20201,20202,20302,21926,24088,54483,56312,63873,66725,80859,216799	Alox5ap,Fabp4,C3,Cebpa,Ccr2,Ctsc,Il1b,Lbp,Nfkbia,Osm,S100a8,S100a9,Ccl3,Tnf,Tlr2,Mefv,Nupr1,Trpv4,Lrrk2,Nfkbiz,Nlrp3	21/167

## Sheet: Depleted (sgCsnk1a1 vs sgSHL)
GroupID	Category	Term	Description	LogP	Log(q-value)	Genes	Symbols	InTerm_InList
1_Summary	Reactome Gene Sets	R-MMU-1474244	Extracellular matrix organization	-11.8733	-7.61148	12337,12338,12814,12817,12819,12826,12827,12830,12950,13717,16399,16949,16950,17022,17150,17228,17389,18073,21857,53867,58859,69675,83964,100952,109700,140709,214058,241226,280635,330119,12840,14230,15117,16777,18595,53614,67896,68169,78892,207596,208936,239337,241327,268780,11931,11936,12835,12873,98660	Capn5,Capn6,Col11a1,Col13a1,Col15a1,Col4a1,Col4a2,Col4a5,Hapln1,Eln,Itga2b,Loxl1,Loxl3,Lum,Mfap2,Cma1,Mmp16,Nid1,Timp1,Col5a3,Efemp2,Pxdn,Jam3,Emilin1,Itga1,Col26a1,Megf11,Itga8,Emilin3,Adamts3,Col9a2,Fkbp10,Has2,Lamb1,Pdgfra,Reck,Ccdc80,Ndnf,Crispld2,Thsd4,Adamts18,Adamts12,Olfml2a,Egflam,Atp1b1,Fxyd2,Col6a3,Cpa3,Atp1a2	49/-
1_Member	Reactome Gene Sets	R-MMU-1474244	Extracellular matrix organization	-11.8733	-7.61148	12337,12338,12814,12817,12819,12826,12827,12830,12950,13717,16399,16949,16950,17022,17150,17228,17389,18073,21857,53867,58859,69675,83964,100952,109700,140709,214058,241226,280635,330119	Capn5,Capn6,Col11a1,Col13a1,Col15a1,Col4a1,Col4a2,Col4a5,Hapln1,Eln,Itga2b,Loxl1,Loxl3,Lum,Mfap2,Cma1,Mmp16,Nid1,Timp1,Col5a3,Efemp2,Pxdn,Jam3,Emilin1,Itga1,Col26a1,Megf11,Itga8,Emilin3,Adamts3	30/230
1_Member	GO Biological Processes	GO:0030198	extracellular matrix organization	-11.1386	-7.39536	12814,12817,12819,12826,12827,12830,12840,13717,14230,15117,16777,16949,16950,17228,17389,18073,18595,53614,53867,58859,67896,68169,69675,78892,100952,207596,208936,239337,241226,241327,268780,330119	Col11a1,Col13a1,Col15a1,Col4a1,Col4a2,Col4a5,Col9a2,Eln,Fkbp10,Has2,Lamb1,Loxl1,Loxl3,Cma1,Mmp16,Nid1,Pdgfra,Reck,Col5a3,Efemp2,Ccdc80,Ndnf,Pxdn,Crispld2,Emilin1,Thsd4,Adamts18,Adamts12,Itga8,Olfml2a,Egflam,Adamts3	32/278
1_Member	GO Biological Processes	GO:0045229	external encapsulating structure organization	-11.0968	-7.39536	12814,12817,12819,12826,12827,12830,12840,13717,14230,15117,16777,16949,16950,17228,17389,18073,18595,53614,53867,58859,67896,68169,69675,78892,100952,207596,208936,239337,241226,241327,268780,330119	Col11a1,Col13a1,Col15a1,Col4a1,Col4a2,Col4a5,Col9a2,Eln,Fkbp10,Has2,Lamb1,Loxl1,Loxl3,Cma1,Mmp16,Nid1,Pdgfra,Reck,Col5a3,Efemp2,Ccdc80,Ndnf,Pxdn,Crispld2,Emilin1,Thsd4,Adamts18,Adamts12,Itga8,Olfml2a,Egflam,Adamts3	32/279
1_Member	GO Biological Processes	GO:0043062	extracellular structure organization	-11.0552	-7.39536	12814,12817,12819,12826,12827,12830,12840,13717,14230,15117,16777,16949,16950,17228,17389,18073,18595,53614,53867,58859,67896,68169,69675,78892,100952,207596,208936,239337,241226,241327,268780,330119	Col11a1,Col13a1,Col15a1,Col4a1,Col4a2,Col4a5,Col9a2,Eln,Fkbp10,Has2,Lamb1,Loxl1,Loxl3,Cma1,Mmp16,Nid1,Pdgfra,Reck,Col5a3,Efemp2,Ccdc80,Ndnf,Pxdn,Crispld2,Emilin1,Thsd4,Adamts18,Adamts12,Itga8,Olfml2a,Egflam,Adamts3	32/280
1_Member	Reactome Gene Sets	R-MMU-1474228	Degradation of the extracellular matrix	-6.71546	-3.45361	12337,12338,12814,12817,12819,12826,12827,12830,13717,17228,17389,18073,21857,53867,140709	Capn5,Capn6,Col11a1,Col13a1,Col15a1,Col4a1,Col4a2,Col4a5,Eln,Cma1,Mmp16,Nid1,Timp1,Col5a3,Col26a1	15/106
1_Member	KEGG Pathway	mmu04974	Protein digestion and absorption - Mus musculus (house mouse)	-6.60674	-3.38627	11931,11936,12814,12817,12819,12826,12827,12830,12835,12840,12873,13717,53867,98660,140709	Atp1b1,Fxyd2,Col11a1,Col13a1,Col15a1,Col4a1,Col4a2,Col4a5,Col6a3,Col9a2,Cpa3,Eln,Col5a3,Atp1a2,Col26a1	15/108
1_Member	Reactome Gene Sets	R-MMU-1474290	Collagen formation	-6.20749	-3.05413	12814,12817,12819,12826,12827,12830,16949,16950,53867,69675,140709,330119	Col11a1,Col13a1,Col15a1,Col4a1,Col4a2,Col4a5,Loxl1,Loxl3,Col5a3,Pxdn,Col26a1,Adamts3	12/73
1_Member	Reactome Gene Sets	R-MMU-2243919	Crosslinking of collagen fibrils	-5.78461	-2.79167	12826,12827,12830,16949,16950,69675	Col4a1,Col4a2,Col4a5,Loxl1,Loxl3,Pxdn	6/15
1_Member	Reactome Gene Sets	R-MMU-2022090	Assembly of collagen fibrils and other multimeric structures	-5.53293	-2.68605	12814,12819,12826,12827,12830,16949,16950,53867,69675	Col11a1,Col15a1,Col4a1,Col4a2,Col4a5,Loxl1,Loxl3,Col5a3,Pxdn	9/45
1_Member	Reactome Gene Sets	R-MMU-3000157	Laminin interactions	-5.47338	-2.675	12826,12827,12830,18073,214058	Col4a1,Col4a2,Col4a5,Nid1,Megf11	5/10
1_Member	Reactome Gene Sets	R-MMU-1650814	Collagen biosynthesis and modifying enzymes	-4.46874	-1.91961	12814,12817,12819,12826,12827,12830,53867,140709,330119	Col11a1,Col13a1,Col15a1,Col4a1,Col4a2,Col4a5,Col5a3,Col26a1,Adamts3	9/60
1_Member	Reactome Gene Sets	R-MMU-1442490	Collagen degradation	-3.93538	-1.58734	12814,12817,12819,12826,12827,12830,53867,140709	Col11a1,Col13a1,Col15a1,Col4a1,Col4a2,Col4a5,Col5a3,Col26a1	8/55
1_Member	Reactome Gene Sets	R-MMU-3000171	Non-integrin membrane-ECM interactions	-2.78669	-0.803676	12814,12826,12827,12830,53867	Col11a1,Col4a1,Col4a2,Col4a5,Col5a3	5/32
1_Member	Reactome Gene Sets	R-MMU-8948216	Collagen chain trimerization	-2.60849	-0.704548	12814,12817,12819,53867,140709	Col11a1,Col13a1,Col15a1,Col5a3,Col26a1	5/35
1_Member	GO Biological Processes	GO:0038063	collagen-activated tyrosine kinase receptor signaling pathway	-2.43059	-0.613172	12826,12827,12830	Col4a1,Col4a2,Col4a5	3/12
1_Member	GO Biological Processes	GO:0038065	collagen-activated signaling pathway	-2.06007	-0.412057	12826,12827,12830	Col4a1,Col4a2,Col4a5	3/16
1_Member	Reactome Gene Sets	R-MMU-419037	NCAM1 interactions	-2.06007	-0.412057	12826,12827,53867	Col4a1,Col4a2,Col5a3	3/16
2_Summary	GO Biological Processes	GO:0097435	supramolecular fiber organization	-8.92199	-5.3591	11519,11856,12578,12808,12814,13717,14230,16669,16691,16885,16949,16950,17974,18595,18596,22041,22240,22351,56320,58859,66898,67252,68166,68794,69675,71994,72114,73121,76686,100952,102502,108897,207596,208943,210356,211401,216961,217125,225115,227753,234915,239337,240121,243725,14739,27494,68075,76441,77569,16511,109676	Add2,Arhgap6,Cdkn2a,Cobl,Col11a1,Eln,Fkbp10,Krt19,Krt8,Limk1,Loxl1,Loxl3,Nck2,Pdgfra,Pdgfrb,Trf,Dpysl3,Vill,Dbn1,Efemp2,Baiap2l1,Cap2,Spire1,Flnc,Pxdn,Cnn3,Zbed3,Rflna,Clip3,Emilin1,Pls1,Aif1l,Thsd4,Myo5c,Nckap5,Mtss1,Coro6,Samd14,Svil,Gsn,Cep126,Adamts12,Fsd1,Ppp1r9a,S1pr2,Amot,Lurap1,Daam2,Limch1,Kcnh2,Ank2	51/-
2_Member	GO Biological Processes	GO:0097435	supramolecular fiber organization	-8.92199	-5.3591	11519,11856,12578,12808,12814,13717,14230,16669,16691,16885,16949,16950,17974,18595,18596,22041,22240,22351,56320,58859,66898,67252,68166,68794,69675,71994,72114,73121,76686,100952,102502,108897,207596,208943,210356,211401,216961,217125,225115,227753,234915,239337,240121,243725	Add2,Arhgap6,Cdkn2a,Cobl,Col11a1,Eln,Fkbp10,Krt19,Krt8,Limk1,Loxl1,Loxl3,Nck2,Pdgfra,Pdgfrb,Trf,Dpysl3,Vill,Dbn1,Efemp2,Baiap2l1,Cap2,Spire1,Flnc,Pxdn,Cnn3,Zbed3,Rflna,Clip3,Emilin1,Pls1,Aif1l,Thsd4,Myo5c,Nckap5,Mtss1,Coro6,Samd14,Svil,Gsn,Cep126,Adamts12,Fsd1,Ppp1r9a	44/581
2_Member	GO Biological Processes	GO:0007015	actin filament organization	-6.86605	-3.55843	11519,11856,12808,13717,16885,17974,22041,22240,22351,56320,66898,67252,68166,71994,72114,73121,102502,108897,208943,211401,216961,217125,225115,227753,243725	Add2,Arhgap6,Cobl,Eln,Limk1,Nck2,Trf,Dpysl3,Vill,Dbn1,Baiap2l1,Cap2,Spire1,Cnn3,Zbed3,Rflna,Pls1,Aif1l,Myo5c,Mtss1,Coro6,Samd14,Svil,Gsn,Ppp1r9a	25/272
2_Member	GO Biological Processes	GO:0030036	actin cytoskeleton organization	-5.8378	-2.79167	11519,11856,12808,13717,14739,16669,16691,16885,17974,18595,18596,22041,22240,22351,27494,56320,66898,67252,68075,68166,68794,71994,72114,73121,76441,77569,102502,108897,208943,211401,216961,217125,225115,227753,243725	Add2,Arhgap6,Cobl,Eln,S1pr2,Krt19,Krt8,Limk1,Nck2,Pdgfra,Pdgfrb,Trf,Dpysl3,Vill,Amot,Dbn1,Baiap2l1,Cap2,Lurap1,Spire1,Flnc,Cnn3,Zbed3,Rflna,Daam2,Limch1,Pls1,Aif1l,Myo5c,Mtss1,Coro6,Samd14,Svil,Gsn,Ppp1r9a	35/528
2_Member	GO Biological Processes	GO:0030029	actin filament-based process	-5.70923	-2.76959	11519,11856,12808,13717,14739,16511,16669,16691,16885,17974,18595,18596,22041,22240,22351,27494,56320,66898,67252,68075,68166,68794,71994,72114,73121,76441,77569,102502,108897,109676,208943,211401,216961,217125,225115,227753,243725	Add2,Arhgap6,Cobl,Eln,S1pr2,Kcnh2,Krt19,Krt8,Limk1,Nck2,Pdgfra,Pdgfrb,Trf,Dpysl3,Vill,Amot,Dbn1,Baiap2l1,Cap2,Lurap1,Spire1,Flnc,Cnn3,Zbed3,Rflna,Daam2,Limch1,Pls1,Aif1l,Ank2,Myo5c,Mtss1,Coro6,Samd14,Svil,Gsn,Ppp1r9a	37/582
2_Member	GO Biological Processes	GO:0061572	actin filament bundle organization	-4.08105	-1.68251	11519,13717,16885,22240,66898,68166,73121,102502,108897	Add2,Eln,Limk1,Dpysl3,Baiap2l1,Spire1,Rflna,Pls1,Aif1l	9/67
2_Member	GO Biological Processes	GO:0051017	actin filament bundle assembly	-3.46815	-1.2316	11519,13717,16885,22240,66898,68166,102502,108897	Add2,Eln,Limk1,Dpysl3,Baiap2l1,Spire1,Pls1,Aif1l	8/64
3_Summary	GO Biological Processes	GO:0035239	tube morphogenesis	-8.40845	-4.92475	11601,11819,11839,12705,12808,12826,12827,13617,13809,13982,14089,14164,14174,14230,14615,15117,15213,15375,16399,17286,17986,18595,18596,18654,18667,18710,20204,20429,20471,20496,20674,21417,21677,21817,21838,22160,24063,27494,53614,57875,58859,68169,69675,69847,78560,83964,170823,211401,233651,320924,100038489,14239,14387,18053	Angpt2,Nr2f2,Areg,Cited1,Cobl,Col4a1,Col4a2,Ednra,Enpep,Esr1,Fap,Fgf1,Fgf3,Fkbp10,Gjc1,Has2,Hey1,Foxa1,Itga2b,Meox2,Ndp,Pdgfra,Pdgfrb,Pgf,Pgr,Pik3r3,Prrx2,Shox2,Six1,Slc12a2,Sox2,Zeb1,Tead2,Tgm2,Thy1,Twist1,Spry1,Amot,Reck,Angptl4,Efemp2,Ndnf,Pxdn,Wnk4,Adgra2,Jam3,Glmn,Mtss1,Dchs1,Ccbe1,Apela,Foxs1,Gaa,Ngfr	54/-
3_Member	GO Biological Processes	GO:0035239	tube morphogenesis	-8.40845	-4.92475	11601,11819,11839,12705,12808,12826,12827,13617,13809,13982,14089,14164,14174,14230,14615,15117,15213,15375,16399,17286,17986,18595,18596,18654,18667,18710,20204,20429,20471,20496,20674,21417,21677,21817,21838,22160,24063,27494,53614,57875,58859,68169,69675,69847,78560,83964,170823,211401,233651,320924,100038489	Angpt2,Nr2f2,Areg,Cited1,Cobl,Col4a1,Col4a2,Ednra,Enpep,Esr1,Fap,Fgf1,Fgf3,Fkbp10,Gjc1,Has2,Hey1,Foxa1,Itga2b,Meox2,Ndp,Pdgfra,Pdgfrb,Pgf,Pgr,Pik3r3,Prrx2,Shox2,Six1,Slc12a2,Sox2,Zeb1,Tead2,Tgm2,Thy1,Twist1,Spry1,Amot,Reck,Angptl4,Efemp2,Ndnf,Pxdn,Wnk4,Adgra2,Jam3,Glmn,Mtss1,Dchs1,Ccbe1,Apela	51/762
3_Member	GO Biological Processes	GO:0048514	blood vessel morphogenesis	-7.2329	-3.81614	11601,11819,12705,12826,12827,13617,13809,14089,14164,14230,14615,15117,15213,16399,17286,17986,18595,18596,18654,18710,20204,20471,21677,21838,27494,53614,57875,58859,68169,69675,78560,83964,170823,320924,100038489	Angpt2,Nr2f2,Cited1,Col4a1,Col4a2,Ednra,Enpep,Fap,Fgf1,Fkbp10,Gjc1,Has2,Hey1,Itga2b,Meox2,Ndp,Pdgfra,Pdgfrb,Pgf,Pik3r3,Prrx2,Six1,Tead2,Thy1,Amot,Reck,Angptl4,Efemp2,Ndnf,Pxdn,Adgra2,Jam3,Glmn,Ccbe1,Apela	35/461
3_Member	GO Biological Processes	GO:0001568	blood vessel development	-6.20204	-3.05413	11601,11819,12705,12826,12827,13617,13809,14089,14164,14230,14239,14387,14615,15117,15213,16399,17286,17986,18053,18595,18596,18654,18710,20204,20471,21677,21838,27494,53614,57875,58859,68169,69675,78560,83964,170823,320924,100038489	Angpt2,Nr2f2,Cited1,Col4a1,Col4a2,Ednra,Enpep,Fap,Fgf1,Fkbp10,Foxs1,Gaa,Gjc1,Has2,Hey1,Itga2b,Meox2,Ndp,Ngfr,Pdgfra,Pdgfrb,Pgf,Pik3r3,Prrx2,Six1,Tead2,Thy1,Amot,Reck,Angptl4,Efemp2,Ndnf,Pxdn,Adgra2,Jam3,Glmn,Ccbe1,Apela	38/578
3_Member	GO Biological Processes	GO:0001944	vasculature development	-5.53822	-2.68605	11601,11819,12705,12826,12827,13617,13809,14089,14164,14230,14239,14387,14615,15117,15213,16399,17286,17986,18053,18595,18596,18654,18710,20204,20471,21677,21838,27494,53614,57875,58859,68169,69675,78560,83964,170823,320924,100038489	Angpt2,Nr2f2,Cited1,Col4a1,Col4a2,Ednra,Enpep,Fap,Fgf1,Fkbp10,Foxs1,Gaa,Gjc1,Has2,Hey1,Itga2b,Meox2,Ndp,Ngfr,Pdgfra,Pdgfrb,Pgf,Pik3r3,Prrx2,Six1,Tead2,Thy1,Amot,Reck,Angptl4,Efemp2,Ndnf,Pxdn,Adgra2,Jam3,Glmn,Ccbe1,Apela	38/616
3_Member	GO Biological Processes	GO:0001525	angiogenesis	-4.5607	-1.97094	11601,12826,12827,13617,13809,14089,14164,16399,17286,17986,18595,18596,18654,18710,21838,27494,53614,57875,68169,69675,78560,83964,320924,100038489	Angpt2,Col4a1,Col4a2,Ednra,Enpep,Fap,Fgf1,Itga2b,Meox2,Ndp,Pdgfra,Pdgfrb,Pgf,Pik3r3,Thy1,Amot,Reck,Angptl4,Ndnf,Pxdn,Adgra2,Jam3,Ccbe1,Apela	24/343
3_Member	GO Biological Processes	GO:0001570	vasculogenesis	-3.76385	-1.45139	12705,14164,14615,15117,15213,18596,21677,27494,170823,100038489	Cited1,Fgf1,Gjc1,Has2,Hey1,Pdgfrb,Tead2,Amot,Glmn,Apela	10/90
4_Summary	KEGG Pathway	mmu04512	ECM-receptor interaction - Mus musculus (house mouse)	-6.89328	-3.55843	12826,12827,12830,12835,12840,16399,16773,16777,19699,23928,75209,109700,241226,329872,18595,18596,18654,18710,19417,68794,70549,271849,11601,11839,14062,14164,14174,16002,18053,19116,74551,243764,12814,15375,18705,19017,53867,29857,243659,27401,12578,13617,13982,15213,19218,20850,27412,56198,224129,235320,69379	Col4a1,Col4a2,Col4a5,Col6a3,Col9a2,Itga2b,Lama2,Lamb1,Reln,Lamc3,Sv2c,Itga1,Itga8,Frem1,Pdgfra,Pdgfrb,Pgf,Pik3r3,Rasgrf1,Flnc,Tln2,Shc4,Angpt2,Areg,F2r,Fgf1,Fgf3,Igf2,Ngfr,Prlr,Pck2,Chrm2,Col11a1,Foxa1,Pik3c2g,Ppargc1a,Col5a3,Mapk12,Styk1,Skp2,Cdkn2a,Ednra,Esr1,Hey1,Ptger3,Stat5a,Peg12,Heyl,Adcy5,Zbtb16,C8g	51/-
4_Member	KEGG Pathway	mmu04512	ECM-receptor interaction - Mus musculus (house mouse)	-6.89328	-3.55843	12826,12827,12830,12835,12840,16399,16773,16777,19699,23928,75209,109700,241226,329872	Col4a1,Col4a2,Col4a5,Col6a3,Col9a2,Itga2b,Lama2,Lamb1,Reln,Lamc3,Sv2c,Itga1,Itga8,Frem1	14/89
4_Member	KEGG Pathway	mmu04510	Focal adhesion - Mus musculus (house mouse)	-6.08777	-3.002	12826,12827,12830,12835,12840,16399,16773,16777,18595,18596,18654,18710,19417,19699,23928,68794,70549,109700,241226,271849	Col4a1,Col4a2,Col4a5,Col6a3,Col9a2,Itga2b,Lama2,Lamb1,Pdgfra,Pdgfrb,Pgf,Pik3r3,Rasgrf1,Reln,Lamc3,Flnc,Tln2,Itga1,Itga8,Shc4	20/203
4_Member	KEGG Pathway	mmu04151	PI3K-Akt signaling pathway - Mus musculus (house mouse)	-5.04832	-2.33857	11601,11839,12826,12827,12830,12835,12840,14062,14164,14174,16002,16399,16773,16777,18053,18595,18596,18654,18710,19116,19699,23928,74551,109700,241226,243764	Angpt2,Areg,Col4a1,Col4a2,Col4a5,Col6a3,Col9a2,F2r,Fgf1,Fgf3,Igf2,Itga2b,Lama2,Lamb1,Ngfr,Pdgfra,Pdgfrb,Pgf,Pik3r3,Prlr,Reln,Lamc3,Pck2,Itga1,Itga8,Chrm2	26/364
4_Member	WikiPathways	WP2841	Focal adhesion PI3K Akt mTOR signaling pathway	-4.64194	-2.04284	11601,12814,12826,12827,14062,14164,14174,15375,16399,16773,16777,18053,18595,18596,18654,18705,19017,19116,19699,23928,53867,241226,243764	Angpt2,Col11a1,Col4a1,Col4a2,F2r,Fgf1,Fgf3,Foxa1,Itga2b,Lama2,Lamb1,Ngfr,Pdgfra,Pdgfrb,Pgf,Pik3c2g,Ppargc1a,Prlr,Reln,Lamc3,Col5a3,Itga8,Chrm2	23/317
4_Member	WikiPathways	WP85	Focal adhesion	-3.74769	-1.44487	12814,12826,12827,16399,16773,16777,18595,18596,18654,19699,23928,29857,53867,241226,243659	Col11a1,Col4a1,Col4a2,Itga2b,Lama2,Lamb1,Pdgfra,Pdgfrb,Pgf,Reln,Lamc3,Mapk12,Col5a3,Itga8,Styk1	15/185
4_Member	KEGG Pathway	mmu05222	Small cell lung cancer - Mus musculus (house mouse)	-3.00086	-0.923694	12826,12827,12830,16399,16773,16777,18710,23928,27401	Col4a1,Col4a2,Col4a5,Itga2b,Lama2,Lamb1,Pik3r3,Lamc3,Skp2	9/93
4_Member	KEGG Pathway	mmu05200	Pathways in cancer - Mus musculus (house mouse)	-2.36877	-0.578202	12578,12826,12827,12830,13617,13982,14062,14164,14174,15213,16002,16399,16773,16777,18595,18596,18654,18710,19218,20850,23928,27401,27412,56198,224129,235320	Cdkn2a,Col4a1,Col4a2,Col4a5,Ednra,Esr1,F2r,Fgf1,Fgf3,Hey1,Igf2,Itga2b,Lama2,Lamb1,Pdgfra,Pdgfrb,Pgf,Pik3r3,Ptger3,Stat5a,Lamc3,Skp2,Peg12,Heyl,Adcy5,Zbtb16	26/543
4_Member	KEGG Pathway	mmu05146	Amoebiasis - Mus musculus (house mouse)	-2.04252	-0.401834	12826,12827,12830,16773,16777,18710,23928,69379	Col4a1,Col4a2,Col4a5,Lama2,Lamb1,Pik3r3,Lamc3,C8g	8/107
5_Summary	GO Biological Processes	GO:0072001	renal system development	-6.08913	-3.002	11601,11609,12577,12826,13003,13617,13809,14164,15139,15213,18073,18595,18596,18654,19126,19662,20471,24063,56198,69847,72135,211401,218476,233651,235041,235320,241226,11839,12578,12583,12808,13982,14174,15375,16002,16004,17242,17701,18667,19116,19123,20378,20496,20674,20850,21817,74551,216233,12817,12814,18053,20429,21677,22160,56079,58859,170823	Angpt2,Agtr2,Cdkn1c,Col4a1,Vcan,Ednra,Enpep,Fgf1,Hc,Hey1,Nid1,Pdgfra,Pdgfrb,Pgf,Prom1,Rbp4,Six1,Spry1,Heyl,Wnk4,Pygo1,Mtss1,Gcnt4,Dchs1,Kank2,Zbtb16,Itga8,Areg,Cdkn2a,Cdo1,Cobl,Esr1,Fgf3,Foxa1,Igf2,Igf2r,Mdk,Msx1,Pgr,Prlr,Proc,Frzb,Slc12a2,Sox2,Stat5a,Tgm2,Pck2,Socs2,Col13a1,Col11a1,Ngfr,Shox2,Tead2,Twist1,Astn2,Efemp2,Glmn	57/-
5_Member	GO Biological Processes	GO:0072001	renal system development	-6.08913	-3.002	11601,11609,12577,12826,13003,13617,13809,14164,15139,15213,18073,18595,18596,18654,19126,19662,20471,24063,56198,69847,72135,211401,218476,233651,235041,235320,241226	Angpt2,Agtr2,Cdkn1c,Col4a1,Vcan,Ednra,Enpep,Fgf1,Hc,Hey1,Nid1,Pdgfra,Pdgfrb,Pgf,Prom1,Rbp4,Six1,Spry1,Heyl,Wnk4,Pygo1,Mtss1,Gcnt4,Dchs1,Kank2,Zbtb16,Itga8	27/340
5_Member	GO Biological Processes	GO:0072006	nephron development	-5.7525	-2.79167	11601,13617,13809,14164,15139,15213,18073,18595,18596,18654,19126,20471,56198,69847,211401,233651	Angpt2,Ednra,Enpep,Fgf1,Hc,Hey1,Nid1,Pdgfra,Pdgfrb,Pgf,Prom1,Six1,Heyl,Wnk4,Mtss1,Dchs1	16/142
5_Member	GO Biological Processes	GO:0032835	glomerulus development	-5.684	-2.76457	11601,13617,13809,15139,18073,18595,18596,19126,56198,211401	Angpt2,Ednra,Enpep,Hc,Nid1,Pdgfra,Pdgfrb,Prom1,Heyl,Mtss1	10/55
5_Member	GO Biological Processes	GO:0001822	kidney development	-5.45974	-2.675	11601,11609,12577,13003,13617,13809,14164,15139,15213,18073,18595,18596,18654,19126,20471,24063,56198,69847,72135,211401,218476,233651,235041,235320,241226	Angpt2,Agtr2,Cdkn1c,Vcan,Ednra,Enpep,Fgf1,Hc,Hey1,Nid1,Pdgfra,Pdgfrb,Pgf,Prom1,Six1,Spry1,Heyl,Wnk4,Pygo1,Mtss1,Gcnt4,Dchs1,Kank2,Zbtb16,Itga8	25/324
5_Member	GO Biological Processes	GO:0072073	kidney epithelium development	-3.8116	-1.48424	13003,13617,14164,15213,18654,19126,20471,24063,56198,69847,211401,233651,235041	Vcan,Ednra,Fgf1,Hey1,Pgf,Prom1,Six1,Spry1,Heyl,Wnk4,Mtss1,Dchs1,Kank2	13/143
5_Member	GO Biological Processes	GO:0048732	gland development	-3.36496	-1.15789	11839,12577,12578,12583,12808,13617,13982,14174,15375,16002,16004,17242,17701,18595,18596,18667,19116,19123,20378,20471,20496,20674,20850,21817,74551,216233	Areg,Cdkn1c,Cdkn2a,Cdo1,Cobl,Ednra,Esr1,Fgf3,Foxa1,Igf2,Igf2r,Mdk,Msx1,Pdgfra,Pdgfrb,Pgr,Prlr,Proc,Frzb,Six1,Slc12a2,Sox2,Stat5a,Tgm2,Pck2,Socs2	26/461
5_Member	GO Biological Processes	GO:0048754	branching morphogenesis of an epithelial tube	-3.15694	-1.01996	11839,12826,13617,13982,14164,15375,18654,18667,20471,20496,20674,24063,233651	Areg,Col4a1,Ednra,Esr1,Fgf1,Foxa1,Pgf,Pgr,Six1,Slc12a2,Sox2,Spry1,Dchs1	13/167
5_Member	GO Biological Processes	GO:0072009	nephron epithelium development	-3.15471	-1.01996	13617,14164,15213,18654,19126,20471,56198,69847,211401,233651	Ednra,Fgf1,Hey1,Pgf,Prom1,Six1,Heyl,Wnk4,Mtss1,Dchs1	10/107
5_Member	GO Biological Processes	GO:0001763	morphogenesis of a branching structure	-3.13981	-1.01581	11839,12817,12826,13617,13982,14164,15375,18654,18667,20471,20496,20674,21817,24063,233651	Areg,Col13a1,Col4a1,Ednra,Esr1,Fgf1,Foxa1,Pgf,Pgr,Six1,Slc12a2,Sox2,Tgm2,Spry1,Dchs1	15/211
5_Member	GO Biological Processes	GO:0048729	tissue morphogenesis	-3.01556	-0.925741	11839,12808,12814,12826,13617,13982,14164,14174,15213,15375,17701,18053,18654,18667,20378,20429,20471,20496,20674,20850,21677,21817,22160,24063,56079,56198,58859,69847,170823,211401,218476,233651	Areg,Cobl,Col11a1,Col4a1,Ednra,Esr1,Fgf1,Fgf3,Hey1,Foxa1,Msx1,Ngfr,Pgf,Pgr,Frzb,Shox2,Six1,Slc12a2,Sox2,Stat5a,Tead2,Tgm2,Twist1,Spry1,Astn2,Heyl,Efemp2,Wnk4,Glmn,Mtss1,Gcnt4,Dchs1	32/647
5_Member	GO Biological Processes	GO:0061138	morphogenesis of a branching epithelium	-2.90369	-0.858035	11839,12826,13617,13982,14164,15375,18654,18667,20471,20496,20674,21817,24063,233651	Areg,Col4a1,Ednra,Esr1,Fgf1,Foxa1,Pgf,Pgr,Six1,Slc12a2,Sox2,Tgm2,Spry1,Dchs1	14/200
5_Member	GO Biological Processes	GO:0061326	renal tubule development	-2.90241	-0.858035	12826,14164,15213,18654,20471,56198,69847,211401,233651	Col4a1,Fgf1,Hey1,Pgf,Six1,Heyl,Wnk4,Mtss1,Dchs1	9/96
5_Member	GO Biological Processes	GO:0060562	epithelial tube morphogenesis	-2.87524	-0.843833	11839,12808,12826,13617,13982,14164,14174,15213,15375,18654,18667,20471,20496,20674,21677,22160,24063,69847,170823,211401,233651	Areg,Cobl,Col4a1,Ednra,Esr1,Fgf1,Fgf3,Hey1,Foxa1,Pgf,Pgr,Six1,Slc12a2,Sox2,Tead2,Twist1,Spry1,Wnk4,Glmn,Mtss1,Dchs1	21/369
5_Member	GO Biological Processes	GO:0061333	renal tubule morphogenesis	-2.78223	-0.803676	12826,14164,15213,18654,20471,69847,211401,233651	Col4a1,Fgf1,Hey1,Pgf,Six1,Wnk4,Mtss1,Dchs1	8/81
5_Member	GO Biological Processes	GO:0072080	nephron tubule development	-2.52281	-0.651888	14164,15213,18654,20471,56198,69847,211401,233651	Fgf1,Hey1,Pgf,Six1,Heyl,Wnk4,Mtss1,Dchs1	8/89
5_Member	GO Biological Processes	GO:0002009	morphogenesis of an epithelium	-2.47415	-0.62662	11839,12808,12826,13617,13982,14164,14174,15213,15375,18053,18654,18667,20378,20471,20496,20674,20850,21677,21817,22160,24063,56079,69847,170823,211401,233651	Areg,Cobl,Col4a1,Ednra,Esr1,Fgf1,Fgf3,Hey1,Foxa1,Ngfr,Pgf,Pgr,Frzb,Six1,Slc12a2,Sox2,Stat5a,Tead2,Tgm2,Twist1,Spry1,Astn2,Wnk4,Glmn,Mtss1,Dchs1	26/533
5_Member	GO Biological Processes	GO:0060993	kidney morphogenesis	-2.29374	-0.548777	11609,14164,15213,18654,20471,69847,218476,233651	Agtr2,Fgf1,Hey1,Pgf,Six1,Wnk4,Gcnt4,Dchs1	8/97
5_Member	GO Biological Processes	GO:0001823	mesonephros development	-2.18897	-0.487014	13003,14164,15213,18654,20471,24063,233651,235320	Vcan,Fgf1,Hey1,Pgf,Six1,Spry1,Dchs1,Zbtb16	8/101
6_Summary	GO Biological Processes	GO:0010810	regulation of cell-substrate adhesion	-5.81943	-2.79167	11601,11856,12578,13612,15117,16852,17242,18073,19242,21838,24066,56320,58859,67896,68169,77569,100952,140709,218952,235431,268780,15013,16002,16773,16777,17974,19159,20443,20667,20674,20850,21817,110351,235320	Angpt2,Arhgap6,Cdkn2a,Edil3,Has2,Lgals1,Mdk,Nid1,Ptn,Thy1,Spry4,Dbn1,Efemp2,Ccdc80,Ndnf,Limch1,Emilin1,Col26a1,Fermt2,Coro2b,Egflam,H2-Q2,Igf2,Lama2,Lamb1,Nck2,Cyth3,St3gal4,Sox12,Sox2,Stat5a,Tgm2,Rap1gap,Zbtb16	34/-
6_Member	GO Biological Processes	GO:0010810	regulation of cell-substrate adhesion	-5.81943	-2.79167	11601,11856,12578,13612,15117,16852,17242,18073,19242,21838,24066,56320,58859,67896,68169,77569,100952,140709,218952,235431,268780	Angpt2,Arhgap6,Cdkn2a,Edil3,Has2,Lgals1,Mdk,Nid1,Ptn,Thy1,Spry4,Dbn1,Efemp2,Ccdc80,Ndnf,Limch1,Emilin1,Col26a1,Fermt2,Coro2b,Egflam	21/230
6_Member	GO Biological Processes	GO:0010811	positive regulation of cell-substrate adhesion	-4.44682	-1.90924	13612,15117,17242,18073,19242,21838,56320,58859,67896,68169,100952,140709,218952,268780	Edil3,Has2,Mdk,Nid1,Ptn,Thy1,Dbn1,Efemp2,Ccdc80,Ndnf,Emilin1,Col26a1,Fermt2,Egflam	14/142
6_Member	GO Biological Processes	GO:0045785	positive regulation of cell adhesion	-3.0705	-0.963976	13612,15013,15117,16002,16773,16777,16852,17242,17974,18073,19159,19242,20443,20667,20674,20850,21817,21838,56320,58859,67896,68169,100952,110351,140709,218952,235320,268780	Edil3,H2-Q2,Has2,Igf2,Lama2,Lamb1,Lgals1,Mdk,Nck2,Nid1,Cyth3,Ptn,St3gal4,Sox12,Sox2,Stat5a,Tgm2,Thy1,Dbn1,Efemp2,Ccdc80,Ndnf,Emilin1,Rap1gap,Col26a1,Fermt2,Zbtb16,Egflam	28/535
7_Summary	GO Biological Processes	GO:0048568	embryonic organ development	-5.76355	-2.79167	11695,11819,12577,12705,12808,12814,13345,13617,13799,14174,15213,15427,16002,16669,16691,17150,17389,17701,18595,18596,19662,20204,20378,20429,20471,20674,21417,21677,22160,26380,53601,102502,213081,241226,100038489,13386,13390,12167,12817,12950,13003,13516,15117,19228,23972,73121,209448,229644,233651,235320,239337,329872,11830,17986,19126,19242,21838,214058,27494,53614,170823,319520,15444	Alx4,Nr2f2,Cdkn1c,Cited1,Cobl,Col11a1,Twist2,Ednra,En2,Fgf3,Hey1,Hoxc9,Igf2,Krt19,Krt8,Mfap2,Mmp16,Msx1,Pdgfra,Pdgfrb,Rbp4,Prrx2,Frzb,Shox2,Six1,Sox2,Zeb1,Tead2,Twist1,Esrrb,Pcdh12,Pls1,Wdr19,Itga8,Apela,Dlk1,Dlx1,Bmpr1b,Col13a1,Hapln1,Vcan,Epyc,Has2,Pth1r,Papss2,Rflna,Hoxc10,Trim45,Dchs1,Zbtb16,Adamts12,Frem1,Aqp5,Ndp,Prom1,Ptn,Thy1,Megf11,Amot,Reck,Glmn,Dusp4,Hpca	63/-
7_Member	GO Biological Processes	GO:0048568	embryonic organ development	-5.76355	-2.79167	11695,11819,12577,12705,12808,12814,13345,13617,13799,14174,15213,15427,16002,16669,16691,17150,17389,17701,18595,18596,19662,20204,20378,20429,20471,20674,21417,21677,22160,26380,53601,102502,213081,241226,100038489	Alx4,Nr2f2,Cdkn1c,Cited1,Cobl,Col11a1,Twist2,Ednra,En2,Fgf3,Hey1,Hoxc9,Igf2,Krt19,Krt8,Mfap2,Mmp16,Msx1,Pdgfra,Pdgfrb,Rbp4,Prrx2,Frzb,Shox2,Six1,Sox2,Zeb1,Tead2,Twist1,Esrrb,Pcdh12,Pls1,Wdr19,Itga8,Apela	35/532
7_Member	GO Biological Processes	GO:0048706	embryonic skeletal system development	-5.51437	-2.68388	11695,12814,13345,13386,13390,13617,15427,17389,18595,19662,20204,20429,20471,21417,22160,213081	Alx4,Col11a1,Twist2,Dlk1,Dlx1,Ednra,Hoxc9,Mmp16,Pdgfra,Rbp4,Prrx2,Shox2,Six1,Zeb1,Twist1,Wdr19	16/148
7_Member	GO Biological Processes	GO:0001501	skeletal system development	-5.4659	-2.675	11695,12167,12577,12814,12817,12950,13003,13345,13386,13390,13516,13617,15117,15427,17389,17701,18595,18596,19228,19662,20204,20429,20471,21417,22160,23972,73121,209448,213081,229644,233651,235320,239337,329872	Alx4,Bmpr1b,Cdkn1c,Col11a1,Col13a1,Hapln1,Vcan,Twist2,Dlk1,Dlx1,Epyc,Ednra,Has2,Hoxc9,Mmp16,Msx1,Pdgfra,Pdgfrb,Pth1r,Rbp4,Prrx2,Shox2,Six1,Zeb1,Twist1,Papss2,Rflna,Hoxc10,Wdr19,Trim45,Dchs1,Zbtb16,Adamts12,Frem1	34/525
7_Member	GO Biological Processes	GO:0048704	embryonic skeletal system morphogenesis	-4.32357	-1.82901	11695,12814,13345,15427,17389,18595,20204,20429,20471,21417,22160,213081	Alx4,Col11a1,Twist2,Hoxc9,Mmp16,Pdgfra,Prrx2,Shox2,Six1,Zeb1,Twist1,Wdr19	12/110
7_Member	GO Biological Processes	GO:0048705	skeletal system morphogenesis	-3.97922	-1.62585	11695,12167,12814,12817,13345,15117,15427,17389,17701,18595,18596,20204,20429,20471,21417,22160,73121,213081,329872	Alx4,Bmpr1b,Col11a1,Col13a1,Twist2,Has2,Hoxc9,Mmp16,Msx1,Pdgfra,Pdgfrb,Prrx2,Shox2,Six1,Zeb1,Twist1,Rflna,Wdr19,Frem1	19/260
7_Member	GO Biological Processes	GO:0048562	embryonic organ morphogenesis	-3.86714	-1.52956	11695,12814,13345,13617,14174,15427,17150,17389,17701,18595,19662,20204,20378,20429,20471,20674,21417,21677,22160,102502,213081,241226	Alx4,Col11a1,Twist2,Ednra,Fgf3,Hoxc9,Mfap2,Mmp16,Msx1,Pdgfra,Rbp4,Prrx2,Frzb,Shox2,Six1,Sox2,Zeb1,Tead2,Twist1,Pls1,Wdr19,Itga8	22/333
7_Member	GO Biological Processes	GO:0090596	sensory organ morphogenesis	-3.71552	-1.41746	11830,12814,13617,14174,17150,17701,17986,19126,19242,19662,20204,20378,20471,20674,21417,21838,22160,102502,213081,214058,241226	Aqp5,Col11a1,Ednra,Fgf3,Mfap2,Msx1,Ndp,Prom1,Ptn,Rbp4,Prrx2,Frzb,Six1,Sox2,Zeb1,Thy1,Twist1,Pls1,Wdr19,Megf11,Itga8	21/318
7_Member	GO Biological Processes	GO:1904888	cranial skeletal system development	-3.36284	-1.15789	13345,13617,17389,18595,20204,20471,22160,213081,329872	Twist2,Ednra,Mmp16,Pdgfra,Prrx2,Six1,Twist1,Wdr19,Frem1	9/83
7_Member	GO Biological Processes	GO:0048598	embryonic morphogenesis	-3.34458	-1.14718	11695,12577,12808,12814,13345,13617,14174,15427,16002,17150,17389,17701,18595,19662,20204,20378,20429,20471,20674,21417,21677,22160,26380,27494,53614,102502,170823,209448,213081,235320,241226,319520,100038489	Alx4,Cdkn1c,Cobl,Col11a1,Twist2,Ednra,Fgf3,Hoxc9,Igf2,Mfap2,Mmp16,Msx1,Pdgfra,Rbp4,Prrx2,Frzb,Shox2,Six1,Sox2,Zeb1,Tead2,Twist1,Esrrb,Amot,Reck,Pls1,Glmn,Hoxc10,Wdr19,Zbtb16,Itga8,Dusp4,Apela	33/645
7_Member	GO Biological Processes	GO:0042471	ear morphogenesis	-3.19083	-1.04371	12814,13617,14174,17701,20204,20378,20471,20674,21417,102502,213081,241226	Col11a1,Ednra,Fgf3,Msx1,Prrx2,Frzb,Six1,Sox2,Zeb1,Pls1,Wdr19,Itga8	12/145
7_Member	GO Biological Processes	GO:0048701	embryonic cranial skeleton morphogenesis	-3.14709	-1.01581	13345,17389,18595,20204,20471,22160,213081	Twist2,Mmp16,Pdgfra,Prrx2,Six1,Twist1,Wdr19	7/55
7_Member	GO Biological Processes	GO:0043583	ear development	-2.7384	-0.779734	12814,13617,14174,15213,15444,17701,20204,20378,20471,20674,21417,26380,102502,213081,233651,241226	Col11a1,Ednra,Fgf3,Hey1,Hpca,Msx1,Prrx2,Frzb,Six1,Sox2,Zeb1,Esrrb,Pls1,Wdr19,Dchs1,Itga8	16/255
7_Member	GO Biological Processes	GO:0048839	inner ear development	-2.48413	-0.63389	12814,14174,15213,15444,17701,20204,20378,20471,20674,21417,26380,102502,233651,241226	Col11a1,Fgf3,Hey1,Hpca,Msx1,Prrx2,Frzb,Six1,Sox2,Zeb1,Esrrb,Pls1,Dchs1,Itga8	14/222
7_Member	GO Biological Processes	GO:0060348	bone development	-2.46665	-0.62662	12167,12817,13516,15117,17389,17701,20429,22160,23972,229644,233651,235320,239337,329872	Bmpr1b,Col13a1,Epyc,Has2,Mmp16,Msx1,Shox2,Twist1,Papss2,Trim45,Dchs1,Zbtb16,Adamts12,Frem1	14/223
7_Member	GO Biological Processes	GO:0042472	inner ear morphogenesis	-2.22132	-0.510917	12814,14174,20204,20378,20471,20674,21417,102502,241226	Col11a1,Fgf3,Prrx2,Frzb,Six1,Sox2,Zeb1,Pls1,Itga8	9/121
8_Summary	GO Biological Processes	GO:0085029	extracellular matrix assembly	-5.6491	-2.74897	13717,14230,15117,16777,58859,69675,100952,207596,16949,16950,17150,241226,280635	Eln,Fkbp10,Has2,Lamb1,Efemp2,Pxdn,Emilin1,Thsd4,Loxl1,Loxl3,Mfap2,Itga8,Emilin3	13/-
8_Member	GO Biological Processes	GO:0085029	extracellular matrix assembly	-5.6491	-2.74897	13717,14230,15117,16777,58859,69675,100952,207596	Eln,Fkbp10,Has2,Lamb1,Efemp2,Pxdn,Emilin1,Thsd4	8/33
8_Member	Reactome Gene Sets	R-MMU-1566948	Elastic fibre formation	-5.06526	-2.33857	13717,16949,16950,17150,58859,100952,241226,280635	Eln,Loxl1,Loxl3,Mfap2,Efemp2,Emilin1,Itga8,Emilin3	8/39
8_Member	Reactome Gene Sets	R-MMU-2129379	Molecules associated with elastic fibres	-3.69851	-1.40674	13717,17150,58859,100952,241226,280635	Eln,Mfap2,Efemp2,Emilin1,Itga8,Emilin3	6/32
8_Member	GO Biological Processes	GO:0048251	elastic fiber assembly	-2.54668	-0.67043	58859,100952,207596	Efemp2,Emilin1,Thsd4	3/11
9_Summary	GO Biological Processes	GO:0051056	regulation of small GTPase mediated signal transduction	-5.55254	-2.68605	11517,11549,14062,14121,18053,18596,19159,19417,19699,24063,24066,27494,74002,99326,108699,110351,215821,235041,244418,268970,545481	Adcyap1r1,Adra1a,F2r,Fbp1,Ngfr,Pdgfrb,Cyth3,Rasgrf1,Reln,Spry1,Spry4,Amot,Psd2,Garnl3,Chn1,Rap1gap,Arfgef3,Kank2,Prag1,Arhgap28,Arhgap40	21/-
9_Member	GO Biological Processes	GO:0051056	regulation of small GTPase mediated signal transduction	-5.55254	-2.68605	11517,11549,14062,14121,18053,18596,19159,19417,19699,24063,24066,27494,74002,99326,108699,110351,215821,235041,244418,268970,545481	Adcyap1r1,Adra1a,F2r,Fbp1,Ngfr,Pdgfrb,Cyth3,Rasgrf1,Reln,Spry1,Spry4,Amot,Psd2,Garnl3,Chn1,Rap1gap,Arfgef3,Kank2,Prag1,Arhgap28,Arhgap40	21/239
9_Member	GO Biological Processes	GO:0046578	regulation of Ras protein signal transduction	-2.31249	-0.551691	11549,14062,14121,18053,18596,19159,19417,24063,24066,74002,215821,235041,244418	Adra1a,F2r,Fbp1,Ngfr,Pdgfrb,Cyth3,Rasgrf1,Spry1,Spry4,Psd2,Arfgef3,Kank2,Prag1	13/208
10_Summary	GO Biological Processes	GO:0060485	mesenchyme development	-5.38251	-2.61202	13617,15117,15213,16950,17285,17701,18569,20360,20361,20378,20471,21677,22160,24063,56198,73703,231858,233651,629378,666794,100044509,18596,11549,11609,12814,13003,13717,14164,14387,14615,18213,18595,19662,20429,68861,73713,100952,109676,100038489	Ednra,Has2,Hey1,Loxl3,Meox1,Msx1,Pdcd4,Sema6c,Sema7a,Frzb,Six1,Tead2,Twist1,Spry1,Heyl,Dppa2,Radil,Dchs1,Dact3,Rbm24,Tgfbr3l,Pdgfrb,Adra1a,Agtr2,Col11a1,Vcan,Eln,Fgf1,Gaa,Gjc1,Ntrk3,Pdgfra,Rbp4,Shox2,Dipk2a,Rbm20,Emilin1,Ank2,Apela	39/-
10_Member	GO Biological Processes	GO:0060485	mesenchyme development	-5.38251	-2.61202	13617,15117,15213,16950,17285,17701,18569,20360,20361,20378,20471,21677,22160,24063,56198,73703,231858,233651,629378,666794,100044509	Ednra,Has2,Hey1,Loxl3,Meox1,Msx1,Pdcd4,Sema6c,Sema7a,Frzb,Six1,Tead2,Twist1,Spry1,Heyl,Dppa2,Radil,Dchs1,Dact3,Rbm24,Tgfbr3l	21/245
10_Member	GO Biological Processes	GO:0048762	mesenchymal cell differentiation	-4.46546	-1.91961	13617,15117,15213,16950,17701,18569,20360,20361,20378,20471,22160,24063,56198,231858,629378,100044509	Ednra,Has2,Hey1,Loxl3,Msx1,Pdcd4,Sema6c,Sema7a,Frzb,Six1,Twist1,Spry1,Heyl,Radil,Dact3,Tgfbr3l	16/179
10_Member	GO Biological Processes	GO:0060317	cardiac epithelial to mesenchymal transition	-4.33698	-1.831	15117,15213,17701,18569,24063,56198	Has2,Hey1,Msx1,Pdcd4,Spry1,Heyl	6/25
10_Member	GO Biological Processes	GO:0001837	epithelial to mesenchymal transition	-4.15235	-1.72934	13617,15117,15213,16950,17701,18569,24063,56198,629378,100044509	Ednra,Has2,Hey1,Loxl3,Msx1,Pdcd4,Spry1,Heyl,Dact3,Tgfbr3l	10/81
10_Member	GO Biological Processes	GO:0060973	cell migration involved in heart development	-3.00539	-0.923694	13617,18596,22160,233651	Ednra,Pdgfrb,Twist1,Dchs1	4/17
10_Member	GO Biological Processes	GO:0007507	heart development	-2.7703	-0.800699	11549,11609,12814,13003,13617,13717,14164,14387,14615,15117,15213,17701,18213,18569,18595,18596,19662,20429,20471,21677,22160,24063,56198,68861,73713,100952,109676,233651,666794,100038489	Adra1a,Agtr2,Col11a1,Vcan,Ednra,Eln,Fgf1,Gaa,Gjc1,Has2,Hey1,Msx1,Ntrk3,Pdcd4,Pdgfra,Pdgfrb,Rbp4,Shox2,Six1,Tead2,Twist1,Spry1,Heyl,Dipk2a,Rbm20,Emilin1,Ank2,Dchs1,Rbm24,Apela	30/615
10_Member	GO Biological Processes	GO:0003170	heart valve development	-2.71337	-0.769578	13717,15213,20429,22160,56198,100952,233651	Eln,Hey1,Shox2,Twist1,Heyl,Emilin1,Dchs1	7/65
10_Member	GO Biological Processes	GO:0003007	heart morphogenesis	-2.59476	-0.692738	12814,13617,13717,14387,15117,15213,17701,18569,19662,20429,20471,21677,22160,24063,56198,73713,233651	Col11a1,Ednra,Eln,Gaa,Has2,Hey1,Msx1,Pdcd4,Rbp4,Shox2,Six1,Tead2,Twist1,Spry1,Heyl,Rbm20,Dchs1	17/288
10_Member	GO Biological Processes	GO:0003197	endocardial cushion development	-2.59034	-0.692096	15213,17701,22160,56198,233651,666794	Hey1,Msx1,Twist1,Heyl,Dchs1,Rbm24	6/51
10_Member	GO Biological Processes	GO:0003179	heart valve morphogenesis	-2.4636	-0.62662	13717,15213,22160,56198,100952,233651	Eln,Hey1,Twist1,Heyl,Emilin1,Dchs1	6/54
10_Member	GO Biological Processes	GO:0003203	endocardial cushion morphogenesis	-2.44835	-0.617857	15213,17701,22160,56198,233651	Hey1,Msx1,Twist1,Heyl,Dchs1	5/38
10_Member	GO Biological Processes	GO:0003198	epithelial to mesenchymal transition involved in endocardial cushion formation	-2.43059	-0.613172	15213,17701,56198	Hey1,Msx1,Heyl	3/12
10_Member	GO Biological Processes	GO:0003272	endocardial cushion formation	-2.35494	-0.572593	15213,17701,56198,233651	Hey1,Msx1,Heyl,Dchs1	4/25
10_Member	GO Biological Processes	GO:1905314	semi-lunar valve development	-2.35015	-0.572593	13717,15213,22160,56198,100952	Eln,Hey1,Twist1,Heyl,Emilin1	5/40
10_Member	GO Biological Processes	GO:0003181	atrioventricular valve morphogenesis	-2.29173	-0.548777	15213,22160,56198,233651	Hey1,Twist1,Heyl,Dchs1	4/26
10_Member	GO Biological Processes	GO:0003180	aortic valve morphogenesis	-2.11866	-0.444515	13717,15213,22160,100952	Eln,Hey1,Twist1,Emilin1	4/29
10_Member	GO Biological Processes	GO:0003171	atrioventricular valve development	-2.06582	-0.412057	15213,22160,56198,233651	Hey1,Twist1,Heyl,Dchs1	4/30
11_Summary	GO Biological Processes	GO:0045596	negative regulation of cell differentiation	-5.24415	-2.48744	11839,12578,12705,13345,13386,13390,13610,15213,15375,16002,16950,17242,17701,18213,18569,19218,19242,20360,20361,20378,20674,20850,20927,21417,21838,22160,24063,26380,30051,50915,60599,72147,73121,76441,110351,217265,218952,235320,235402,239114,239337,435965,629378	Areg,Cdkn2a,Cited1,Twist2,Dlk1,Dlx1,S1pr3,Hey1,Foxa1,Igf2,Loxl3,Mdk,Msx1,Ntrk3,Pdcd4,Ptger3,Ptn,Sema6c,Sema7a,Frzb,Sox2,Stat5a,Abcc8,Zeb1,Thy1,Twist1,Spry1,Esrrb,Spdef,Grb14,Trp53inp1,Zbtb46,Rflna,Daam2,Rap1gap,Abca5,Fermt2,Zbtb16,Lingo1,Il17d,Adamts12,Lrp3,Dact3	43/-
11_Member	GO Biological Processes	GO:0045596	negative regulation of cell differentiation	-5.24415	-2.48744	11839,12578,12705,13345,13386,13390,13610,15213,15375,16002,16950,17242,17701,18213,18569,19218,19242,20360,20361,20378,20674,20850,20927,21417,21838,22160,24063,26380,30051,50915,60599,72147,73121,76441,110351,217265,218952,235320,235402,239114,239337,435965,629378	Areg,Cdkn2a,Cited1,Twist2,Dlk1,Dlx1,S1pr3,Hey1,Foxa1,Igf2,Loxl3,Mdk,Msx1,Ntrk3,Pdcd4,Ptger3,Ptn,Sema6c,Sema7a,Frzb,Sox2,Stat5a,Abcc8,Zeb1,Thy1,Twist1,Spry1,Esrrb,Spdef,Grb14,Trp53inp1,Zbtb46,Rflna,Daam2,Rap1gap,Abca5,Fermt2,Zbtb16,Lingo1,Il17d,Adamts12,Lrp3,Dact3	43/759
11_Member	GO Biological Processes	GO:0010721	negative regulation of cell development	-2.40607	-0.606608	12578,13390,13610,16950,17242,18213,19242,20360,20361,20378,20927,21838,50915,72147,73121,76441,235402,239114	Cdkn2a,Dlx1,S1pr3,Loxl3,Mdk,Ntrk3,Ptn,Sema6c,Sema7a,Frzb,Abcc8,Thy1,Grb14,Zbtb46,Rflna,Daam2,Lingo1,Il17d	18/326
11_Member	GO Biological Processes	GO:0014014	negative regulation of gliogenesis	-2.27151	-0.534694	13390,18213,19242,20927,76441,235402	Dlx1,Ntrk3,Ptn,Abcc8,Daam2,Lingo1	6/59
12_Summary	GO Biological Processes	GO:0090066	regulation of anatomical structure size	-5.09034	-2.347	11519,11549,11609,13429,13617,13717,14062,14630,16885,17755,17974,18213,19092,19218,20360,20361,20496,22351,22439,53416,56320,58804,60596,66898,76441,98660,102502,109700,225115,227753,235041,242553,243725,268970,382253,545481,11856,18596,69592,77569,83964,109676,211401,218952,235431,242253,58859,76686,100952,12338,18008,240121,13865,13982,14089,16852,18053,19017,19242,20408,20910,21838,22240,5362…	Add2,Adra1a,Agtr2,Dnm1,Ednra,Eln,F2r,Gclm,Limk1,Map1b,Nck2,Ntrk3,Prkg2,Ptger3,Sema6c,Sema7a,Slc12a2,Vill,Xk,Stk39,Dbn1,Cdc42ep5,Gucy1a1,Baiap2l1,Daam2,Atp1a2,Pls1,Itga1,Svil,Gsn,Kank2,Kank4,Ppp1r9a,Arhgap28,Cdkl5,Arhgap40,Arhgap6,Pdgfrb,Odam,Limch1,Jam3,Ank2,Mtss1,Fermt2,Coro2b,Dnai3,Efemp2,Clip3,Emilin1,Capn6,Nes,Fsd1,Nr2f1,Esr1,Fap,Lgals1,Ngfr,Ppargc1a,Ptn,Sh3gl3,Stxbp1,Thy1,Dpysl3,Cldn7,Rap1ga…	73/-
12_Member	GO Biological Processes	GO:0090066	regulation of anatomical structure size	-5.09034	-2.347	11519,11549,11609,13429,13617,13717,14062,14630,16885,17755,17974,18213,19092,19218,20360,20361,20496,22351,22439,53416,56320,58804,60596,66898,76441,98660,102502,109700,225115,227753,235041,242553,243725,268970,382253,545481	Add2,Adra1a,Agtr2,Dnm1,Ednra,Eln,F2r,Gclm,Limk1,Map1b,Nck2,Ntrk3,Prkg2,Ptger3,Sema6c,Sema7a,Slc12a2,Vill,Xk,Stk39,Dbn1,Cdc42ep5,Gucy1a1,Baiap2l1,Daam2,Atp1a2,Pls1,Itga1,Svil,Gsn,Kank2,Kank4,Ppp1r9a,Arhgap28,Cdkl5,Arhgap40	36/595
12_Member	GO Biological Processes	GO:0032970	regulation of actin filament-based process	-5.04413	-2.33857	11519,11856,13717,16885,17974,18596,19218,22351,56320,58804,66898,69592,76441,77569,83964,98660,109676,211401,218952,225115,227753,235041,235431,242253,242553,243725,268970,545481	Add2,Arhgap6,Eln,Limk1,Nck2,Pdgfrb,Ptger3,Vill,Dbn1,Cdc42ep5,Baiap2l1,Odam,Daam2,Limch1,Jam3,Atp1a2,Ank2,Mtss1,Fermt2,Svil,Gsn,Kank2,Coro2b,Dnai3,Kank4,Ppp1r9a,Arhgap28,Arhgap40	28/409
12_Member	GO Biological Processes	GO:0110053	regulation of actin filament organization	-4.928	-2.24592	11519,11856,13717,16885,17974,22351,56320,58804,66898,76441,77569,211401,218952,225115,227753,235041,235431,242253,242553,243725,268970,545481	Add2,Arhgap6,Eln,Limk1,Nck2,Vill,Dbn1,Cdc42ep5,Baiap2l1,Daam2,Limch1,Mtss1,Fermt2,Svil,Gsn,Kank2,Coro2b,Dnai3,Kank4,Ppp1r9a,Arhgap28,Arhgap40	22/283
12_Member	GO Biological Processes	GO:0030833	regulation of actin filament polymerization	-4.86576	-2.19497	11519,13717,17974,22351,56320,58804,66898,76441,225115,227753,235041,242553,243725,268970,545481	Add2,Eln,Nck2,Vill,Dbn1,Cdc42ep5,Baiap2l1,Daam2,Svil,Gsn,Kank2,Kank4,Ppp1r9a,Arhgap28,Arhgap40	15/148
12_Member	GO Biological Processes	GO:0032956	regulation of actin cytoskeleton organization	-4.69104	-2.05243	11519,11856,13717,16885,17974,18596,22351,56320,58804,66898,69592,76441,77569,83964,211401,218952,225115,227753,235041,235431,242253,242553,243725,268970,545481	Add2,Arhgap6,Eln,Limk1,Nck2,Pdgfrb,Vill,Dbn1,Cdc42ep5,Baiap2l1,Odam,Daam2,Limch1,Jam3,Mtss1,Fermt2,Svil,Gsn,Kank2,Coro2b,Dnai3,Kank4,Ppp1r9a,Arhgap28,Arhgap40	25/359
12_Member	GO Biological Processes	GO:0032535	regulation of cellular component size	-4.4955	-1.93262	11519,13429,13717,16885,17755,17974,18213,19092,20360,20361,20496,22351,22439,53416,56320,58804,66898,76441,102502,225115,227753,235041,242553,243725,268970,382253,545481	Add2,Dnm1,Eln,Limk1,Map1b,Nck2,Ntrk3,Prkg2,Sema6c,Sema7a,Slc12a2,Vill,Xk,Stk39,Dbn1,Cdc42ep5,Baiap2l1,Daam2,Pls1,Svil,Gsn,Kank2,Kank4,Ppp1r9a,Arhgap28,Cdkl5,Arhgap40	27/415
12_Member	GO Biological Processes	GO:1902903	regulation of supramolecular fiber organization	-4.38057	-1.8669	11519,11856,13717,16885,17755,17974,22351,56320,58804,58859,66898,76441,76686,77569,100952,211401,218952,225115,227753,235041,235431,242253,242553,243725,268970,545481	Add2,Arhgap6,Eln,Limk1,Map1b,Nck2,Vill,Dbn1,Cdc42ep5,Efemp2,Baiap2l1,Daam2,Clip3,Limch1,Emilin1,Mtss1,Fermt2,Svil,Gsn,Kank2,Coro2b,Dnai3,Kank4,Ppp1r9a,Arhgap28,Arhgap40	26/398
12_Member	GO Biological Processes	GO:0008064	regulation of actin polymerization or depolymerization	-4.21796	-1.77633	11519,13717,17974,22351,56320,58804,66898,76441,225115,227753,235041,242553,243725,268970,545481	Add2,Eln,Nck2,Vill,Dbn1,Cdc42ep5,Baiap2l1,Daam2,Svil,Gsn,Kank2,Kank4,Ppp1r9a,Arhgap28,Arhgap40	15/168
12_Member	GO Biological Processes	GO:0032271	regulation of protein polymerization	-4.21211	-1.77633	11519,13717,17755,17974,22351,56320,58804,66898,76441,76686,225115,227753,235041,242553,243725,268970,545481	Add2,Eln,Map1b,Nck2,Vill,Dbn1,Cdc42ep5,Baiap2l1,Daam2,Clip3,Svil,Gsn,Kank2,Kank4,Ppp1r9a,Arhgap28,Arhgap40	17/208
12_Member	GO Biological Processes	GO:0030832	regulation of actin filament length	-4.13012	-1.71336	11519,13717,17974,22351,56320,58804,66898,76441,225115,227753,235041,242553,243725,268970,545481	Add2,Eln,Nck2,Vill,Dbn1,Cdc42ep5,Baiap2l1,Daam2,Svil,Gsn,Kank2,Kank4,Ppp1r9a,Arhgap28,Arhgap40	15/171
12_Member	GO Biological Processes	GO:1902904	negative regulation of supramolecular fiber organization	-4.04444	-1.6608	11519,11856,17755,22351,56320,76686,100952,225115,227753,235041,235431,242253,242553,243725,268970	Add2,Arhgap6,Map1b,Vill,Dbn1,Clip3,Emilin1,Svil,Gsn,Kank2,Coro2b,Dnai3,Kank4,Ppp1r9a,Arhgap28	15/174
12_Member	GO Biological Processes	GO:0051493	regulation of cytoskeleton organization	-3.76502	-1.45139	11519,11856,12338,13717,16885,17755,17974,18008,18596,22351,56320,58804,66898,69592,76441,76686,77569,83964,211401,218952,225115,227753,235041,235431,240121,242253,242553,243725,268970,545481	Add2,Arhgap6,Capn6,Eln,Limk1,Map1b,Nck2,Nes,Pdgfrb,Vill,Dbn1,Cdc42ep5,Baiap2l1,Odam,Daam2,Clip3,Limch1,Jam3,Mtss1,Fermt2,Svil,Gsn,Kank2,Coro2b,Fsd1,Dnai3,Kank4,Ppp1r9a,Arhgap28,Arhgap40	30/534
12_Member	GO Biological Processes	GO:0051494	negative regulation of cytoskeleton organization	-3.55366	-1.28961	11519,11856,17755,22351,56320,76686,225115,227753,235041,235431,242253,242553,243725,268970	Add2,Arhgap6,Map1b,Vill,Dbn1,Clip3,Svil,Gsn,Kank2,Coro2b,Dnai3,Kank4,Ppp1r9a,Arhgap28	14/172
12_Member	GO Biological Processes	GO:0051129	negative regulation of cellular component organization	-2.80197	-0.807282	11519,11856,13865,13982,14089,16852,17755,18053,19017,19242,20360,20361,20408,20910,21838,22240,22351,53624,56320,76686,83964,100952,110351,216363,217356,224023,225115,227753,235041,235180,235431,242253,242553,243725,244418,268970	Add2,Arhgap6,Nr2f1,Esr1,Fap,Lgals1,Map1b,Ngfr,Ppargc1a,Ptn,Sema6c,Sema7a,Sh3gl3,Stxbp1,Thy1,Dpysl3,Vill,Cldn7,Dbn1,Clip3,Jam3,Emilin1,Rap1gap,Rab3ip,Tmc8,Klhl22,Svil,Gsn,Kank2,Fez1,Coro2b,Dnai3,Kank4,Ppp1r9a,Prag1,Arhgap28	36/779
12_Member	GO Biological Processes	GO:0051016	barbed-end actin filament capping	-2.64251	-0.725892	11519,22351,225115,227753	Add2,Vill,Svil,Gsn	4/21
12_Member	GO Biological Processes	GO:0043254	regulation of protein-containing complex assembly	-2.4708	-0.62662	11519,13717,17755,17974,20910,22351,53624,56320,58804,66898,76441,76686,83964,217356,218952,225115,227753,235041,242553,243725,268970,545481,100038882	Add2,Eln,Map1b,Nck2,Stxbp1,Vill,Cldn7,Dbn1,Cdc42ep5,Baiap2l1,Daam2,Clip3,Jam3,Tmc8,Fermt2,Svil,Gsn,Kank2,Kank4,Ppp1r9a,Arhgap28,Arhgap40,Isg15	23/452
12_Member	GO Biological Processes	GO:0008154	actin polymerization or depolymerization	-2.42336	-0.613172	12808,22351,68166,211401,225115,227753	Cobl,Vill,Spire1,Mtss1,Svil,Gsn	6/55
12_Member	GO Biological Processes	GO:0031333	negative regulation of protein-containing complex assembly	-2.27818	-0.539189	11519,20910,22351,53624,76686,83964,217356,225115,227753,235041,242553	Add2,Stxbp1,Vill,Cldn7,Clip3,Jam3,Tmc8,Svil,Gsn,Kank2,Kank4	11/163
12_Member	GO Biological Processes	GO:0032272	negative regulation of protein polymerization	-2.26564	-0.531412	11519,22351,76686,225115,227753,235041,242553	Add2,Vill,Clip3,Svil,Gsn,Kank2,Kank4	7/78
12_Member	GO Biological Processes	GO:0051014	actin filament severing	-2.22956	-0.51793	22351,225115,227753	Vill,Svil,Gsn	3/14
12_Member	GO Biological Processes	GO:0030837	negative regulation of actin filament polymerization	-2.16627	-0.469075	11519,22351,225115,227753,235041,242553	Add2,Vill,Svil,Gsn,Kank2,Kank4	6/62
13_Summary	Reactome Gene Sets	R-MMU-216083	Integrin cell surface interactions	-4.94284	-2.24918	12817,12826,12827,12830,16399,17022,53867,83964,109700,241226,11856,18073,21838,100952,218952,235431,239337,329872,16777,231858,16797,19242,20361,100038882	Col13a1,Col4a1,Col4a2,Col4a5,Itga2b,Lum,Col5a3,Jam3,Itga1,Itga8,Arhgap6,Nid1,Thy1,Emilin1,Fermt2,Coro2b,Adamts12,Frem1,Lamb1,Radil,Lat,Ptn,Sema7a,Isg15	24/-
13_Member	Reactome Gene Sets	R-MMU-216083	Integrin cell surface interactions	-4.94284	-2.24918	12817,12826,12827,12830,16399,17022,53867,83964,109700,241226	Col13a1,Col4a1,Col4a2,Col4a5,Itga2b,Lum,Col5a3,Jam3,Itga1,Itga8	10/66
13_Member	GO Biological Processes	GO:0007160	cell-matrix adhesion	-4.6939	-2.05243	11856,12817,16399,18073,21838,53867,83964,100952,109700,218952,235431,239337,241226,329872	Arhgap6,Col13a1,Itga2b,Nid1,Thy1,Col5a3,Jam3,Emilin1,Itga1,Fermt2,Coro2b,Adamts12,Itga8,Frem1	14/135
13_Member	GO Biological Processes	GO:0031589	cell-substrate adhesion	-4.23543	-1.77975	11856,12817,16399,16777,18073,21838,53867,83964,100952,109700,218952,231858,235431,239337,241226,329872	Arhgap6,Col13a1,Itga2b,Lamb1,Nid1,Thy1,Col5a3,Jam3,Emilin1,Itga1,Fermt2,Radil,Coro2b,Adamts12,Itga8,Frem1	16/187
13_Member	GO Biological Processes	GO:0007229	integrin-mediated signaling pathway	-3.36284	-1.15789	16399,16797,19242,20361,21838,109700,218952,241226,100038882	Itga2b,Lat,Ptn,Sema7a,Thy1,Itga1,Fermt2,Itga8,Isg15	9/83
14_Summary	Reactome Gene Sets	R-MMU-9006934	Signaling by Receptor Tyrosine Kinases	-4.77594	-2.11614	11839,12223,12814,12826,12827,13982,14164,14783,16002,17228,17242,17974,18213,18595,18596,18654,18710,18791,19242,20408,20850,24063,29857,53867,214058,214425,319520,11601,12167,12705,12830,14174,15114,16797,17701,17986,18053,18569,19116,50915,108699,216233,218952,241226,271849,386655,100044509	Areg,Btc,Col11a1,Col4a1,Col4a2,Esr1,Fgf1,Grb10,Igf2,Cma1,Mdk,Nck2,Ntrk3,Pdgfra,Pdgfrb,Pgf,Pik3r3,Plat,Ptn,Sh3gl3,Stat5a,Spry1,Mapk12,Col5a3,Megf11,Cilp,Dusp4,Angpt2,Bmpr1b,Cited1,Col4a5,Fgf3,Hap1,Lat,Msx1,Ndp,Ngfr,Pdcd4,Prlr,Grb14,Chn1,Socs2,Fermt2,Itga8,Shc4,Eid2,Tgfbr3l	47/-
14_Member	Reactome Gene Sets	R-MMU-9006934	Signaling by Receptor Tyrosine Kinases	-4.77594	-2.11614	11839,12223,12814,12826,12827,13982,14164,14783,16002,17228,17242,17974,18213,18595,18596,18654,18710,18791,19242,20408,20850,24063,29857,53867,214058,214425,319520	Areg,Btc,Col11a1,Col4a1,Col4a2,Esr1,Fgf1,Grb10,Igf2,Cma1,Mdk,Nck2,Ntrk3,Pdgfra,Pdgfrb,Pgf,Pik3r3,Plat,Ptn,Sh3gl3,Stat5a,Spry1,Mapk12,Col5a3,Megf11,Cilp,Dusp4	27/400
14_Member	GO Biological Processes	GO:0007167	enzyme-linked receptor protein signaling pathway	-4.4253	-1.89584	11601,11839,12167,12223,12705,12826,12827,12830,14164,14174,14783,15114,16002,16797,17701,17974,17986,18053,18213,18569,18595,18596,18654,18710,18791,19116,20850,50915,108699,216233,218952,241226,271849,386655,100044509	Angpt2,Areg,Bmpr1b,Btc,Cited1,Col4a1,Col4a2,Col4a5,Fgf1,Fgf3,Grb10,Hap1,Igf2,Lat,Msx1,Nck2,Ndp,Ngfr,Ntrk3,Pdcd4,Pdgfra,Pdgfrb,Pgf,Pik3r3,Plat,Prlr,Stat5a,Grb14,Chn1,Socs2,Fermt2,Itga8,Shc4,Eid2,Tgfbr3l	35/614
14_Member	GO Biological Processes	GO:0007169	transmembrane receptor protein tyrosine kinase signaling pathway	-4.29015	-1.82069	11601,11839,12223,12826,12827,12830,14164,14174,14783,15114,16002,16797,17974,18053,18213,18595,18596,18654,18710,18791,19116,20850,50915,108699,216233,271849	Angpt2,Areg,Btc,Col4a1,Col4a2,Col4a5,Fgf1,Fgf3,Grb10,Hap1,Igf2,Lat,Nck2,Ngfr,Ntrk3,Pdgfra,Pdgfrb,Pgf,Pik3r3,Plat,Prlr,Stat5a,Grb14,Chn1,Socs2,Shc4	26/403
15_Summary	GO Biological Processes	GO:0007423	sensory organ development	-4.66167	-2.04634	11830,12167,12577,12814,12826,13345,13617,14174,15213,15444,16545,17150,17701,17986,18213,18595,18596,19126,19242,19662,20204,20378,20471,20674,21417,21838,22141,22160,23928,26380,69675,102502,208936,213081,214058,233651,241226	Aqp5,Bmpr1b,Cdkn1c,Col11a1,Col4a1,Twist2,Ednra,Fgf3,Hey1,Hpca,Kera,Mfap2,Msx1,Ndp,Ntrk3,Pdgfra,Pdgfrb,Prom1,Ptn,Rbp4,Prrx2,Frzb,Six1,Sox2,Zeb1,Thy1,Tub,Twist1,Lamc3,Esrrb,Pxdn,Pls1,Adamts18,Wdr19,Megf11,Dchs1,Itga8	37/-
15_Member	GO Biological Processes	GO:0007423	sensory organ development	-4.66167	-2.04634	11830,12167,12577,12814,12826,13345,13617,14174,15213,15444,16545,17150,17701,17986,18213,18595,18596,19126,19242,19662,20204,20378,20471,20674,21417,21838,22141,22160,23928,26380,69675,102502,208936,213081,214058,233651,241226	Aqp5,Bmpr1b,Cdkn1c,Col11a1,Col4a1,Twist2,Ednra,Fgf3,Hey1,Hpca,Kera,Mfap2,Msx1,Ndp,Ntrk3,Pdgfra,Pdgfrb,Prom1,Ptn,Rbp4,Prrx2,Frzb,Six1,Sox2,Zeb1,Thy1,Tub,Twist1,Lamc3,Esrrb,Pxdn,Pls1,Adamts18,Wdr19,Megf11,Dchs1,Itga8	37/648
15_Member	GO Biological Processes	GO:0001654	eye development	-3.31814	-1.12817	11830,12167,12577,12826,13345,16545,17150,17986,18213,18595,18596,19126,19242,19662,20674,21417,21838,22141,22160,23928,69675,208936,213081,214058	Aqp5,Bmpr1b,Cdkn1c,Col4a1,Twist2,Kera,Mfap2,Ndp,Ntrk3,Pdgfra,Pdgfrb,Prom1,Ptn,Rbp4,Sox2,Zeb1,Thy1,Tub,Twist1,Lamc3,Pxdn,Adamts18,Wdr19,Megf11	24/414
15_Member	GO Biological Processes	GO:0150063	visual system development	-3.27366	-1.08735	11830,12167,12577,12826,13345,16545,17150,17986,18213,18595,18596,19126,19242,19662,20674,21417,21838,22141,22160,23928,69675,208936,213081,214058	Aqp5,Bmpr1b,Cdkn1c,Col4a1,Twist2,Kera,Mfap2,Ndp,Ntrk3,Pdgfra,Pdgfrb,Prom1,Ptn,Rbp4,Sox2,Zeb1,Thy1,Tub,Twist1,Lamc3,Pxdn,Adamts18,Wdr19,Megf11	24/417
15_Member	GO Biological Processes	GO:0048880	sensory system development	-3.21522	-1.05438	11830,12167,12577,12826,13345,16545,17150,17986,18213,18595,18596,19126,19242,19662,20674,21417,21838,22141,22160,23928,69675,208936,213081,214058	Aqp5,Bmpr1b,Cdkn1c,Col4a1,Twist2,Kera,Mfap2,Ndp,Ntrk3,Pdgfra,Pdgfrb,Prom1,Ptn,Rbp4,Sox2,Zeb1,Thy1,Tub,Twist1,Lamc3,Pxdn,Adamts18,Wdr19,Megf11	24/421
15_Member	GO Biological Processes	GO:0043010	camera-type eye development	-2.87524	-0.843833	11830,12167,12577,12826,13345,16545,17986,18213,18595,18596,19126,19242,19662,20674,21417,21838,22141,22160,23928,213081,214058	Aqp5,Bmpr1b,Cdkn1c,Col4a1,Twist2,Kera,Ndp,Ntrk3,Pdgfra,Pdgfrb,Prom1,Ptn,Rbp4,Sox2,Zeb1,Thy1,Tub,Twist1,Lamc3,Wdr19,Megf11	21/369
15_Member	GO Biological Processes	GO:0060041	retina development in camera-type eye	-2.79269	-0.803676	12167,12826,17986,18595,18596,19126,19242,19662,20674,21838,22141,23928,214058	Bmpr1b,Col4a1,Ndp,Pdgfra,Pdgfrb,Prom1,Ptn,Rbp4,Sox2,Thy1,Tub,Lamc3,Megf11	13/183
15_Member	GO Biological Processes	GO:0060042	retina morphogenesis in camera-type eye	-2.09191	-0.426648	17986,19126,19242,19662,20674,21838,214058	Ndp,Prom1,Ptn,Rbp4,Sox2,Thy1,Megf11	7/84
16_Summary	KEGG Pathway	mmu04970	Salivary secretion - Mus musculus (house mouse)	-4.65734	-2.04634	11549,11722,11830,11931,11936,19092,20496,54195,60596,98660,224129,11609,13617,57816,11517,12425,20614,20927,74551,15203,22041,70358,18710,65962,16511,56543,13429,13982,19228,14062,16526,19218,23984,53623,243764,53416,59095	Adra1a,Amy1,Aqp5,Atp1b1,Fxyd2,Prkg2,Slc12a2,Gucy1b1,Gucy1a1,Atp1a2,Adcy5,Agtr2,Ednra,Tesc,Adcyap1r1,Cckar,Snap25,Abcc8,Pck2,Heph,Trf,Steap1,Pik3r3,Nherf2,Kcnh2,Kcnd3,Dnm1,Esr1,Pth1r,F2r,Kcnk2,Ptger3,Pde10a,Gria3,Chrm2,Stk39,Fxyd6	37/-
16_Member	KEGG Pathway	mmu04970	Salivary secretion - Mus musculus (house mouse)	-4.65734	-2.04634	11549,11722,11830,11931,11936,19092,20496,54195,60596,98660,224129	Adra1a,Amy1,Aqp5,Atp1b1,Fxyd2,Prkg2,Slc12a2,Gucy1b1,Gucy1a1,Atp1a2,Adcy5	11/86
16_Member	GO Biological Processes	GO:0055078	sodium ion homeostasis	-3.21244	-1.05438	11609,11931,13617,20496,57816,98660	Agtr2,Atp1b1,Ednra,Slc12a2,Tesc,Atp1a2	6/39
16_Member	GO Biological Processes	GO:0006883	intracellular sodium ion homeostasis	-3.13488	-1.01581	11609,11931,20496,57816,98660	Agtr2,Atp1b1,Slc12a2,Tesc,Atp1a2	5/27
16_Member	KEGG Pathway	mmu04911	Insulin secretion - Mus musculus (house mouse)	-2.61622	-0.704609	11517,11931,11936,12425,20614,20927,98660,224129	Adcyap1r1,Atp1b1,Fxyd2,Cckar,Snap25,Abcc8,Atp1a2,Adcy5	8/86
16_Member	KEGG Pathway	mmu04964	Proximal tubule bicarbonate reclamation - Mus musculus (house mouse)	-2.56474	-0.677627	11931,11936,74551,98660	Atp1b1,Fxyd2,Pck2,Atp1a2	4/22
16_Member	KEGG Pathway	mmu04978	Mineral absorption - Mus musculus (house mouse)	-2.4636	-0.62662	11931,11936,15203,22041,70358,98660	Atp1b1,Fxyd2,Heph,Trf,Steap1,Atp1a2	6/54
16_Member	KEGG Pathway	mmu04960	Aldosterone-regulated sodium reabsorption - Mus musculus (house mouse)	-2.44835	-0.617857	11931,11936,18710,65962,98660	Atp1b1,Fxyd2,Pik3r3,Nherf2,Atp1a2	5/38
16_Member	GO Biological Processes	GO:1990573	potassium ion import across plasma membrane	-2.25797	-0.530139	11931,16511,20496,56543,98660	Atp1b1,Kcnh2,Slc12a2,Kcnd3,Atp1a2	5/42
16_Member	KEGG Pathway	mmu04961	Endocrine and other factor-regulated calcium reabsorption - Mus musculus (house mouse)	-2.20058	-0.495025	11931,11936,13429,13982,19228,98660	Atp1b1,Fxyd2,Dnm1,Esr1,Pth1r,Atp1a2	6/61
16_Member	GO Biological Processes	GO:0030007	intracellular potassium ion homeostasis	-2.14146	-0.455979	11931,20496,98660	Atp1b1,Slc12a2,Atp1a2	3/15
16_Member	KEGG Pathway	mmu04024	cAMP signaling pathway - Mus musculus (house mouse)	-2.0515	-0.406353	11517,11931,11936,13617,14062,16526,18710,19218,23984,53623,98660,224129,243764	Adcyap1r1,Atp1b1,Fxyd2,Ednra,F2r,Kcnk2,Pik3r3,Ptger3,Pde10a,Gria3,Atp1a2,Adcy5,Chrm2	13/224
16_Member	GO Biological Processes	GO:2000649	regulation of sodium ion transmembrane transporter activity	-2.05016	-0.406353	11931,11936,53416,57816,59095	Atp1b1,Fxyd2,Stk39,Tesc,Fxyd6	5/47
16_Member	KEGG Pathway	mmu04973	Carbohydrate digestion and absorption - Mus musculus (house mouse)	-2.01202	-0.380586	11722,11931,11936,18710,98660	Amy1,Atp1b1,Fxyd2,Pik3r3,Atp1a2	5/48
17_Summary	GO Biological Processes	GO:0008015	blood circulation	-4.65499	-2.04634	11549,11609,11819,11931,12287,12873,13617,13809,14062,14387,14630,16511,17227,18654,19218,20927,27494,53416,60596,69847,98660,100952,109676,109700,218952,227753,231602,235431,100038489,56089,14615,20429,56543,243764,14739,18053,19699,19700,22041,56320,106393,108013,380785	Adra1a,Agtr2,Nr2f2,Atp1b1,Cacna1b,Cpa3,Ednra,Enpep,F2r,Gaa,Gclm,Kcnh2,Mcpt4,Pgf,Ptger3,Abcc8,Amot,Stk39,Gucy1a1,Wnk4,Atp1a2,Emilin1,Ank2,Itga1,Fermt2,Gsn,P2rx2,Coro2b,Apela,Ramp3,Gjc1,Shox2,Kcnd3,Chrm2,S1pr2,Ngfr,Reln,Rem1,Trf,Dbn1,Srl,Celf4,Begain	43/-
17_Member	GO Biological Processes	GO:0008015	blood circulation	-4.65499	-2.04634	11549,11609,11819,11931,12287,12873,13617,13809,14062,14387,14630,16511,17227,18654,19218,20927,27494,53416,60596,69847,98660,100952,109676,109700,218952,227753,231602,235431,100038489	Adra1a,Agtr2,Nr2f2,Atp1b1,Cacna1b,Cpa3,Ednra,Enpep,F2r,Gaa,Gclm,Kcnh2,Mcpt4,Pgf,Ptger3,Abcc8,Amot,Stk39,Gucy1a1,Wnk4,Atp1a2,Emilin1,Ank2,Itga1,Fermt2,Gsn,P2rx2,Coro2b,Apela	29/453
17_Member	GO Biological Processes	GO:0003013	circulatory system process	-4.51463	-1.94296	11549,11609,11819,11931,12287,12873,13617,13809,14062,14387,14630,16511,17227,18654,19218,20927,27494,53416,56089,60596,69847,98660,100952,109676,109700,218952,227753,231602,235431,100038489	Adra1a,Agtr2,Nr2f2,Atp1b1,Cacna1b,Cpa3,Ednra,Enpep,F2r,Gaa,Gclm,Kcnh2,Mcpt4,Pgf,Ptger3,Abcc8,Amot,Stk39,Ramp3,Gucy1a1,Wnk4,Atp1a2,Emilin1,Ank2,Itga1,Fermt2,Gsn,P2rx2,Coro2b,Apela	30/485
17_Member	GO Biological Processes	GO:0008217	regulation of blood pressure	-4.30273	-1.82374	11549,11609,11819,12287,12873,13617,13809,14062,17227,18654,53416,60596,69847,98660,100952,231602,235431,100038489	Adra1a,Agtr2,Nr2f2,Cacna1b,Cpa3,Ednra,Enpep,F2r,Mcpt4,Pgf,Stk39,Gucy1a1,Wnk4,Atp1a2,Emilin1,P2rx2,Coro2b,Apela	18/225
17_Member	GO Biological Processes	GO:0008016	regulation of heart contraction	-2.53087	-0.658179	11549,11609,11931,12287,13617,14387,14615,16511,20429,56543,98660,109676,243764	Adra1a,Agtr2,Atp1b1,Cacna1b,Ednra,Gaa,Gjc1,Kcnh2,Shox2,Kcnd3,Atp1a2,Ank2,Chrm2	13/196
17_Member	GO Biological Processes	GO:0044057	regulation of system process	-2.46523	-0.62662	11549,11609,11931,12287,13617,14062,14387,14615,14739,16511,18053,19218,19699,19700,20429,20927,22041,53416,56320,56543,60596,69847,98660,106393,108013,109676,227753,235431,243764,380785	Adra1a,Agtr2,Atp1b1,Cacna1b,Ednra,F2r,Gaa,Gjc1,S1pr2,Kcnh2,Ngfr,Ptger3,Reln,Rem1,Shox2,Abcc8,Trf,Stk39,Dbn1,Kcnd3,Gucy1a1,Wnk4,Atp1a2,Srl,Celf4,Ank2,Gsn,Coro2b,Chrm2,Begain	30/645
17_Member	GO Biological Processes	GO:1903522	regulation of blood circulation	-2.11735	-0.444324	11549,11609,11931,12287,13617,14062,14387,14615,16511,19218,20429,56543,98660,109676,243764	Adra1a,Agtr2,Atp1b1,Cacna1b,Ednra,F2r,Gaa,Gjc1,Kcnh2,Ptger3,Shox2,Kcnd3,Atp1a2,Ank2,Chrm2	15/270
18_Summary	GO Biological Processes	GO:0061061	muscle structure development	-4.5162	-1.94296	11549,11609,11695,11819,12814,13617,13717,15213,16002,16669,16691,16852,17286,17701,18595,18596,20429,20471,22160,22439,29857,53376,53599,56198,58859,68794,109676,170823,211401,225115,231602,241226,386655,14164,14615,19662,68861	Adra1a,Agtr2,Alx4,Nr2f2,Col11a1,Ednra,Eln,Hey1,Igf2,Krt19,Krt8,Lgals1,Meox2,Msx1,Pdgfra,Pdgfrb,Shox2,Six1,Twist1,Xk,Mapk12,Usp2,Cd164,Heyl,Efemp2,Flnc,Ank2,Glmn,Mtss1,Svil,P2rx2,Itga8,Eid2,Fgf1,Gjc1,Rbp4,Dipk2a	37/-
18_Member	GO Biological Processes	GO:0061061	muscle structure development	-4.5162	-1.94296	11549,11609,11695,11819,12814,13617,13717,15213,16002,16669,16691,16852,17286,17701,18595,18596,20429,20471,22160,22439,29857,53376,53599,56198,58859,68794,109676,170823,211401,225115,231602,241226,386655	Adra1a,Agtr2,Alx4,Nr2f2,Col11a1,Ednra,Eln,Hey1,Igf2,Krt19,Krt8,Lgals1,Meox2,Msx1,Pdgfra,Pdgfrb,Shox2,Six1,Twist1,Xk,Mapk12,Usp2,Cd164,Heyl,Efemp2,Flnc,Ank2,Glmn,Mtss1,Svil,P2rx2,Itga8,Eid2	33/558
18_Member	GO Biological Processes	GO:0007517	muscle organ development	-3.26021	-1.07754	11695,11819,12814,13617,13717,15213,17286,17701,20429,20471,22160,22439,53376,53599,56198,58859,211401,225115,231602,386655	Alx4,Nr2f2,Col11a1,Ednra,Eln,Hey1,Meox2,Msx1,Shox2,Six1,Twist1,Xk,Usp2,Cd164,Heyl,Efemp2,Mtss1,Svil,P2rx2,Eid2	20/320
18_Member	GO Biological Processes	GO:0055001	muscle cell development	-2.94544	-0.879481	11549,11609,13617,16669,16691,18595,18596,20429,20471,22439,58859,68794,109676,231602	Adra1a,Agtr2,Ednra,Krt19,Krt8,Pdgfra,Pdgfrb,Shox2,Six1,Xk,Efemp2,Flnc,Ank2,P2rx2	14/198
18_Member	GO Biological Processes	GO:0060537	muscle tissue development	-2.87952	-0.843833	11549,11609,11819,12814,13617,13717,14164,14615,15213,17286,18595,18596,19662,20429,20471,22439,56198,58859,68861,225115,231602,241226	Adra1a,Agtr2,Nr2f2,Col11a1,Ednra,Eln,Fgf1,Gjc1,Hey1,Meox2,Pdgfra,Pdgfrb,Rbp4,Shox2,Six1,Xk,Heyl,Efemp2,Dipk2a,Svil,P2rx2,Itga8	22/394
18_Member	GO Biological Processes	GO:0042692	muscle cell differentiation	-2.3245	-0.558182	11549,11609,13617,16002,16669,16691,18595,18596,20429,20471,22439,58859,68794,109676,170823,225115,231602,241226	Adra1a,Agtr2,Ednra,Igf2,Krt19,Krt8,Pdgfra,Pdgfrb,Shox2,Six1,Xk,Efemp2,Flnc,Ank2,Glmn,Svil,P2rx2,Itga8	18/332
19_Summary	GO Biological Processes	GO:0043269	regulation of monoatomic ion transport	-4.40505	-1.88355	11517,11931,11936,12287,12425,12805,13617,14062,15114,15444,16497,16511,18596,19092,19218,19699,19700,20856,20927,21838,22041,53376,53416,57816,58187,59095,65962,69847,71912,98660,109676,19417,13982,14783,76686	Adcyap1r1,Atp1b1,Fxyd2,Cacna1b,Cckar,Cntn1,Ednra,F2r,Hap1,Hpca,Kcnab1,Kcnh2,Pdgfrb,Prkg2,Ptger3,Reln,Rem1,Stc2,Abcc8,Thy1,Trf,Usp2,Stk39,Tesc,Cldn10,Fxyd6,Nherf2,Wnk4,Jsrp1,Atp1a2,Ank2,Rasgrf1,Esr1,Grb10,Clip3	35/-
19_Member	GO Biological Processes	GO:0043269	regulation of monoatomic ion transport	-4.40505	-1.88355	11517,11931,11936,12287,12425,12805,13617,14062,15114,15444,16497,16511,18596,19092,19218,19699,19700,20856,20927,21838,22041,53376,53416,57816,58187,59095,65962,69847,71912,98660,109676	Adcyap1r1,Atp1b1,Fxyd2,Cacna1b,Cckar,Cntn1,Ednra,F2r,Hap1,Hpca,Kcnab1,Kcnh2,Pdgfrb,Prkg2,Ptger3,Reln,Rem1,Stc2,Abcc8,Thy1,Trf,Usp2,Stk39,Tesc,Cldn10,Fxyd6,Nherf2,Wnk4,Jsrp1,Atp1a2,Ank2	31/516
19_Member	GO Biological Processes	GO:0010959	regulation of metal ion transport	-4.21429	-1.77633	11517,11931,11936,12287,12425,12805,13617,14062,15114,15444,16497,16511,18596,19218,19700,20856,20927,21838,22041,53376,53416,57816,59095,69847,71912,98660,109676	Adcyap1r1,Atp1b1,Fxyd2,Cacna1b,Cckar,Cntn1,Ednra,F2r,Hap1,Hpca,Kcnab1,Kcnh2,Pdgfrb,Ptger3,Rem1,Stc2,Abcc8,Thy1,Trf,Usp2,Stk39,Tesc,Fxyd6,Wnk4,Jsrp1,Atp1a2,Ank2	27/431
19_Member	GO Biological Processes	GO:0043270	positive regulation of monoatomic ion transport	-3.01113	-0.925361	11517,11931,12805,13617,14062,15114,16511,18596,19699,20927,21838,53416,57816,65962,69847,109676	Adcyap1r1,Atp1b1,Cntn1,Ednra,F2r,Hap1,Kcnh2,Pdgfrb,Reln,Abcc8,Thy1,Stk39,Tesc,Nherf2,Wnk4,Ank2	16/240
19_Member	GO Biological Processes	GO:0034765	regulation of monoatomic ion transmembrane transport	-2.91906	-0.865988	11517,11931,11936,13617,14062,15114,15444,16497,16511,19218,19699,19700,21838,53416,57816,59095,65962,69847,71912,98660,109676	Adcyap1r1,Atp1b1,Fxyd2,Ednra,F2r,Hap1,Hpca,Kcnab1,Kcnh2,Ptger3,Reln,Rem1,Thy1,Stk39,Tesc,Fxyd6,Nherf2,Wnk4,Jsrp1,Atp1a2,Ank2	21/366
19_Member	GO Biological Processes	GO:0043268	positive regulation of potassium ion transport	-2.77508	-0.801409	11931,16511,20927,53416,69847,109676	Atp1b1,Kcnh2,Abcc8,Stk39,Wnk4,Ank2	6/47
19_Member	GO Biological Processes	GO:0051924	regulation of calcium ion transport	-2.7553	-0.790629	11517,11931,12287,12425,13617,14062,15114,15444,18596,19218,19700,20856,21838,53376,71912,98660,109676	Adcyap1r1,Atp1b1,Cacna1b,Cckar,Ednra,F2r,Hap1,Hpca,Pdgfrb,Ptger3,Rem1,Stc2,Thy1,Usp2,Jsrp1,Atp1a2,Ank2	17/278
19_Member	GO Biological Processes	GO:1904062	regulation of monoatomic cation transmembrane transport	-2.74124	-0.780411	11517,11931,11936,13617,14062,15114,15444,16497,16511,19218,19700,21838,53416,57816,59095,69847,71912,98660,109676	Adcyap1r1,Atp1b1,Fxyd2,Ednra,F2r,Hap1,Hpca,Kcnab1,Kcnh2,Ptger3,Rem1,Thy1,Stk39,Tesc,Fxyd6,Wnk4,Jsrp1,Atp1a2,Ank2	19/328
19_Member	GO Biological Processes	GO:0043266	regulation of potassium ion transport	-2.71766	-0.771774	11931,12425,16497,16511,19218,20927,53416,69847,109676	Atp1b1,Cckar,Kcnab1,Kcnh2,Ptger3,Abcc8,Stk39,Wnk4,Ank2	9/102
19_Member	GO Biological Processes	GO:0034767	positive regulation of monoatomic ion transmembrane transport	-2.63944	-0.725892	11517,11931,13617,14062,15114,16511,19699,21838,57816,65962,69847,109676	Adcyap1r1,Atp1b1,Ednra,F2r,Hap1,Kcnh2,Reln,Thy1,Tesc,Nherf2,Wnk4,Ank2	12/168
19_Member	GO Biological Processes	GO:0032412	regulation of monoatomic ion transmembrane transporter activity	-2.61017	-0.704548	11931,11936,13617,15114,15444,16497,19417,19699,19700,53416,57816,59095,71912,109676	Atp1b1,Fxyd2,Ednra,Hap1,Hpca,Kcnab1,Rasgrf1,Reln,Rem1,Stk39,Tesc,Fxyd6,Jsrp1,Ank2	14/215
19_Member	GO Biological Processes	GO:0022898	regulation of transmembrane transporter activity	-2.43207	-0.613172	11931,11936,13617,15114,15444,16497,19417,19699,19700,53416,57816,59095,71912,109676	Atp1b1,Fxyd2,Ednra,Hap1,Hpca,Kcnab1,Rasgrf1,Reln,Rem1,Stk39,Tesc,Fxyd6,Jsrp1,Ank2	14/225
19_Member	GO Biological Processes	GO:1901380	negative regulation of potassium ion transmembrane transport	-2.42131	-0.613172	16497,16511,19218,53416	Kcnab1,Kcnh2,Ptger3,Stk39	4/24
19_Member	GO Biological Processes	GO:0034762	regulation of transmembrane transport	-2.41612	-0.613172	11517,11931,11936,13617,13982,14062,14783,15114,15444,16497,16511,19218,19417,19699,19700,21838,53416,57816,59095,65962,69847,71912,76686,98660,109676	Adcyap1r1,Atp1b1,Fxyd2,Ednra,Esr1,F2r,Grb10,Hap1,Hpca,Kcnab1,Kcnh2,Ptger3,Rasgrf1,Reln,Rem1,Thy1,Stk39,Tesc,Fxyd6,Nherf2,Wnk4,Jsrp1,Clip3,Atp1a2,Ank2	25/511
19_Member	GO Biological Processes	GO:1903169	regulation of calcium ion transmembrane transport	-2.3191	-0.554172	11517,11931,13617,14062,15114,15444,19218,19700,21838,71912,98660,109676	Adcyap1r1,Atp1b1,Ednra,F2r,Hap1,Hpca,Ptger3,Rem1,Thy1,Jsrp1,Atp1a2,Ank2	12/184
19_Member	GO Biological Processes	GO:0032409	regulation of transporter activity	-2.23484	-0.51793	11931,11936,13617,15114,15444,16497,19417,19699,19700,53416,57816,59095,71912,109676	Atp1b1,Fxyd2,Ednra,Hap1,Hpca,Kcnab1,Rasgrf1,Reln,Rem1,Stk39,Tesc,Fxyd6,Jsrp1,Ank2	14/237
19_Member	GO Biological Processes	GO:1901379	regulation of potassium ion transmembrane transport	-2.20573	-0.496539	11931,16497,16511,19218,53416,69847,109676	Atp1b1,Kcnab1,Kcnh2,Ptger3,Stk39,Wnk4,Ank2	7/80
19_Member	GO Biological Processes	GO:1904064	positive regulation of cation transmembrane transport	-2.02442	-0.387877	11517,11931,13617,14062,15114,16511,21838,57816,69847,109676	Adcyap1r1,Atp1b1,Ednra,F2r,Hap1,Kcnh2,Thy1,Tesc,Wnk4,Ank2	10/153
20_Summary	GO Biological Processes	GO:0001890	placenta development	-4.32001	-1.82901	11819,12577,12705,15213,16002,16157,16669,16691,17986,18654,19223,19242,26380,53601,170676,100038489,11931,13184,13617,14230,15139,17701,18595,18596,19228,20674,22160,27494,56320,108013,208908,211401,213081,328779,330119	Nr2f2,Cdkn1c,Cited1,Hey1,Igf2,Il11ra1,Krt19,Krt8,Ndp,Pgf,Ptgis,Ptn,Esrrb,Pcdh12,Peg10,Apela,Atp1b1,Dcpp1,Ednra,Fkbp10,Hc,Msx1,Pdgfra,Pdgfrb,Pth1r,Sox2,Twist1,Amot,Dbn1,Celf4,Ccdc62,Mtss1,Wdr19,Hs3st6,Adamts3	35/-
20_Member	GO Biological Processes	GO:0001890	placenta development	-4.32001	-1.82901	11819,12577,12705,15213,16002,16157,16669,16691,17986,18654,19223,19242,26380,53601,170676,100038489	Nr2f2,Cdkn1c,Cited1,Hey1,Igf2,Il11ra1,Krt19,Krt8,Ndp,Pgf,Ptgis,Ptn,Esrrb,Pcdh12,Peg10,Apela	16/184
20_Member	GO Biological Processes	GO:0001701	in utero embryonic development	-2.75363	-0.790629	11819,11931,12577,12705,13184,13617,14230,15139,15213,16002,16669,16691,17701,18595,18596,19228,20674,22160,26380,27494,53601,56320,108013,208908,211401,213081,328779,330119	Nr2f2,Atp1b1,Cdkn1c,Cited1,Dcpp1,Ednra,Fkbp10,Hc,Hey1,Igf2,Krt19,Krt8,Msx1,Pdgfra,Pdgfrb,Pth1r,Sox2,Twist1,Esrrb,Amot,Pcdh12,Dbn1,Celf4,Ccdc62,Mtss1,Wdr19,Hs3st6,Adamts3	28/562
20_Member	GO Biological Processes	GO:0001892	embryonic placenta development	-2.34048	-0.569987	11819,12577,12705,15213,16002,16669,16691,26380,53601	Nr2f2,Cdkn1c,Cited1,Hey1,Igf2,Krt19,Krt8,Esrrb,Pcdh12	9/116

## Sheet: Enriched (sgMettl14 vs sgSHL)
GroupID	Category	Term	Description	LogP	Log(q-value)	Genes	Symbols	InTerm_InList
1_Summary	GO Biological Processes	GO:0045087	innate immune response	-24.6224	-20.3605	11727,11829,11846,11891,12263,12266,12363,12484,13214,14082,14528,15018,15944,15951,15957,15958,15959,16145,16173,16365,16854,16952,17002,17174,17857,17858,17948,17952,18843,20128,20304,20390,20459,20684,20821,20846,20847,20963,21926,21946,22040,22361,23960,23962,24108,26971,54123,54159,54396,54448,56791,57444,58185,58203,66141,66597,66824,67133,67313,68038,68713,69146,69550,69677,71946,74732,760…	Ang,Aqp4,Arg1,Rab27a,C2,C3,Casp4,Cd24a,Defb1,Fadd,Gch1,H2-Q7,Irgm1,Ifi204,Ifit1,Ifit2,Ifit3,Igtp,Il18,Acod1,Lgals3,Anxa1,Ltf,Masp1,Mx1,Mx2,Naip2,Naip6,Bpifa1,Trim30a,Ccl5,Sftpd,Ptk6,Sp100,Trim21,Stat1,Stat2,Syk,Tnf,Pglyrp1,Trex1,Vnn1,Oas1g,Oasl2,Ubd,Pla2g2f,Irf7,Rnase2b,Irgm2,Il36a,Ube2l6,Isg20,Rsad2,Zbp1,Ifitm3,Trim13,Pycard,Gp2,Inava,Chid1,Ifitm1,Gsdmd,Bst2,Il36b,Endod1,Stx11,Gbp8,Trim12a,Parp9…	193/-
1_Member	GO Biological Processes	GO:0045087	innate immune response	-24.6224	-20.3605	11727,11829,11846,11891,12263,12266,12363,12484,13214,14082,14528,15018,15944,15951,15957,15958,15959,16145,16173,16365,16854,16952,17002,17174,17857,17858,17948,17952,18843,20128,20304,20390,20459,20684,20821,20846,20847,20963,21926,21946,22040,22361,23960,23962,24108,26971,54123,54159,54396,54448,56791,57444,58185,58203,66141,66597,66824,67133,67313,68038,68713,69146,69550,69677,71946,74732,760…	Ang,Aqp4,Arg1,Rab27a,C2,C3,Casp4,Cd24a,Defb1,Fadd,Gch1,H2-Q7,Irgm1,Ifi204,Ifit1,Ifit2,Ifit3,Igtp,Il18,Acod1,Lgals3,Anxa1,Ltf,Masp1,Mx1,Mx2,Naip2,Naip6,Bpifa1,Trim30a,Ccl5,Sftpd,Ptk6,Sp100,Trim21,Stat1,Stat2,Syk,Tnf,Pglyrp1,Trex1,Vnn1,Oas1g,Oasl2,Ubd,Pla2g2f,Irf7,Rnase2b,Irgm2,Il36a,Ube2l6,Isg20,Rsad2,Zbp1,Ifitm3,Trim13,Pycard,Gp2,Inava,Chid1,Ifitm1,Gsdmd,Bst2,Il36b,Endod1,Stx11,Gbp8,Trim12a,Parp9…	96/751
1_Member	GO Biological Processes	GO:0009615	response to virus	-23.3744	-19.4136	14082,15944,15945,15950,15951,15957,15958,15959,16145,16365,17857,17858,20128,20821,20846,20847,21926,22040,23960,23962,24014,54123,54396,57444,58185,58203,58801,66141,66597,66824,67775,68713,69550,73914,76681,76933,80285,80861,94089,94094,98999,209200,209387,213002,226695,229898,230738,231655,236312,246727,246728,246730,320910,381308,631323,667370,667373,100033459,100038882,100040462,100504287	Fadd,Irgm1,Cxcl10,Ifi203,Ifi204,Ifit1,Ifit2,Ifit3,Igtp,Acod1,Mx1,Mx2,Trim30a,Trim21,Stat1,Stat2,Tnf,Trex1,Oas1g,Oasl2,Rnasel,Irf7,Irgm2,Isg20,Rsad2,Zbp1,Pmaip1,Ifitm3,Trim13,Pycard,Rtp4,Ifitm1,Bst2,Irak3,Trim12a,Ifi27l2a,Parp9,Dhx58,Trim7,Trim34a,Znfx1,Dtx3l,Trim30d,Ifitm6,Ifi205,Gbp5,Zc3h12a,Oasl1,Ifi209,Oas3,Oas2,Oas1a,Itgb8,Ifi211,Gm12250,Ifit3b,Ifit1bl1,Ifi208,Isg15,Mndal,Ifi203-ps	61/338
1_Member	GO Biological Processes	GO:0051607	defense response to virus	-22.1963	-18.4575	14082,15945,15950,15951,15957,15958,15959,16365,17858,20128,20821,20846,20847,21926,22040,23960,23962,24014,54123,57444,58185,58203,58801,66141,66597,66824,67775,68713,69550,76681,80285,80861,94089,94094,98999,209200,209387,213002,226695,229898,231655,236312,246727,246728,246730,381308,631323,667370,667373,100033459,100038882,100040462,100504287	Fadd,Cxcl10,Ifi203,Ifi204,Ifit1,Ifit2,Ifit3,Acod1,Mx2,Trim30a,Trim21,Stat1,Stat2,Tnf,Trex1,Oas1g,Oasl2,Rnasel,Irf7,Isg20,Rsad2,Zbp1,Pmaip1,Ifitm3,Trim13,Pycard,Rtp4,Ifitm1,Bst2,Trim12a,Parp9,Dhx58,Trim7,Trim34a,Znfx1,Dtx3l,Trim30d,Ifitm6,Ifi205,Gbp5,Oasl1,Ifi209,Oas3,Oas2,Oas1a,Ifi211,Gm12250,Ifit3b,Ifit1bl1,Ifi208,Isg15,Mndal,Ifi203-ps	53/269
1_Member	GO Biological Processes	GO:0140546	defense response to symbiont	-22.1173	-18.4575	14082,15945,15950,15951,15957,15958,15959,16365,17858,20128,20821,20846,20847,21926,22040,23960,23962,24014,54123,57444,58185,58203,58801,66141,66597,66824,67775,68713,69550,76681,80285,80861,94089,94094,98999,209200,209387,213002,226695,229898,231655,236312,246727,246728,246730,381308,631323,667370,667373,100033459,100038882,100040462,100504287	Fadd,Cxcl10,Ifi203,Ifi204,Ifit1,Ifit2,Ifit3,Acod1,Mx2,Trim30a,Trim21,Stat1,Stat2,Tnf,Trex1,Oas1g,Oasl2,Rnasel,Irf7,Isg20,Rsad2,Zbp1,Pmaip1,Ifitm3,Trim13,Pycard,Rtp4,Ifitm1,Bst2,Trim12a,Parp9,Dhx58,Trim7,Trim34a,Znfx1,Dtx3l,Trim30d,Ifitm6,Ifi205,Gbp5,Oasl1,Ifi209,Oas3,Oas2,Oas1a,Ifi211,Gm12250,Ifit3b,Ifit1bl1,Ifi208,Isg15,Mndal,Ifi203-ps	53/270
1_Member	GO Biological Processes	GO:0002831	regulation of response to biotic stimulus	-21.1006	-17.5377	11501,11622,11846,12363,12484,14082,14972,15018,15024,15039,15040,15944,15950,15951,16145,16364,16365,16447,17002,18708,19041,19294,19695,20128,20304,20709,20723,20821,20846,20847,20963,21354,21926,22040,23960,23993,27419,54123,54396,56213,58185,58203,60533,63953,66222,66824,67313,67664,73914,76681,80285,80861,93694,96935,98999,100340,107515,110557,209200,209387,226695,228801,229898,230738,231655…	Adam8,Ahr,Arg1,Casp4,Cd24a,Fadd,H2-K1,H2-Q7,H2-T10,H2-T22,H2-T23,Irgm1,Ifi203,Ifi204,Igtp,Irf4,Acod1,Ivl,Ltf,Pik3r1,Ppl,Nectin2,Reg3g,Trim30a,Ccl5,Serpinb9f,Serpinb9,Trim21,Stat1,Stat2,Syk,Tap1,Tnf,Trex1,Oas1g,Klk7,Naglu,Irf7,Irgm2,Htra1,Rsad2,Zbp1,Cd274,Dusp10,Serpinb1a,Pycard,Inava,Rnf125,Irak3,Trim12a,Parp9,Dhx58,Clec2d,Susd4,Znfx1,Smpdl3b,Lgr4,H2-Q6,Dtx3l,Trim30d,Ifi205,Bpifb1,Gbp5,Zc3h12a,Oa…	77/572
1_Member	GO Biological Processes	GO:0045071	negative regulation of viral genome replication	-20.3235	-16.9022	15950,15951,17002,17858,20304,21926,23960,23962,24014,57444,58185,66141,68713,69550,98999,213002,226695,231655,236312,246727,246728,246730,381308,100033459,100038882,100040462,100504287	Ifi203,Ifi204,Ltf,Mx2,Ccl5,Tnf,Oas1g,Oasl2,Rnasel,Isg20,Rsad2,Ifitm3,Ifitm1,Bst2,Znfx1,Ifitm6,Ifi205,Oasl1,Ifi209,Oas3,Oas2,Oas1a,Ifi211,Ifi208,Isg15,Mndal,Ifi203-ps	27/67
1_Member	GO Biological Processes	GO:0002832	negative regulation of response to biotic stimulus	-20.319	-16.9022	11622,11846,14972,15018,15024,15039,15040,15944,15950,15951,16145,16365,17002,20709,20723,20821,20847,21354,22040,23960,54396,56213,63953,73914,80861,93694,96935,100340,110557,226695,236312,246727,246730,270151,381308,547253,100033459,100038882,100040462,100504287	Ahr,Arg1,H2-K1,H2-Q7,H2-T10,H2-T22,H2-T23,Irgm1,Ifi203,Ifi204,Igtp,Acod1,Ltf,Serpinb9f,Serpinb9,Trim21,Stat2,Tap1,Trex1,Oas1g,Irgm2,Htra1,Dusp10,Irak3,Dhx58,Clec2d,Susd4,Smpdl3b,H2-Q6,Ifi205,Ifi209,Oas3,Oas1a,Nlrx1,Ifi211,Parp14,Ifi208,Isg15,Mndal,Ifi203-ps	40/165
1_Member	GO Biological Processes	GO:0048525	negative regulation of viral process	-20.2159	-16.8571	15950,15951,17002,17858,20128,20304,20684,20821,20846,21926,23960,23962,24014,57444,58185,66141,66597,68713,69550,76681,98999,209387,213002,226695,231655,236312,246727,246728,246730,381308,100033459,100038882,100040462,100504287	Ifi203,Ifi204,Ltf,Mx2,Trim30a,Ccl5,Sp100,Trim21,Stat1,Tnf,Oas1g,Oasl2,Rnasel,Isg20,Rsad2,Ifitm3,Trim13,Ifitm1,Bst2,Trim12a,Znfx1,Trim30d,Ifitm6,Ifi205,Oasl1,Ifi209,Oas3,Oas2,Oas1a,Ifi211,Ifi208,Isg15,Mndal,Ifi203-ps	34/116
1_Member	GO Biological Processes	GO:0045088	regulation of innate immune response	-18.9926	-15.685	11501,11846,12363,14082,14972,15018,15024,15039,15040,15944,15950,15951,16145,16364,16365,17002,18708,19294,19695,20128,20709,20723,20821,20847,20963,21354,21926,22040,23960,27419,54123,54396,58185,58203,63953,66222,66824,67313,67664,73914,76681,80285,80861,93694,96935,98999,100340,107515,110557,209387,226695,228801,229898,231655,236312,244202,246727,246730,270151,381308,547253,631323,100033459,1…	Adam8,Arg1,Casp4,Fadd,H2-K1,H2-Q7,H2-T10,H2-T22,H2-T23,Irgm1,Ifi203,Ifi204,Igtp,Irf4,Acod1,Ltf,Pik3r1,Nectin2,Reg3g,Trim30a,Serpinb9f,Serpinb9,Trim21,Stat2,Syk,Tap1,Tnf,Trex1,Oas1g,Naglu,Irf7,Irgm2,Rsad2,Zbp1,Dusp10,Serpinb1a,Pycard,Inava,Rnf125,Irak3,Trim12a,Parp9,Dhx58,Clec2d,Susd4,Znfx1,Smpdl3b,Lgr4,H2-Q6,Trim30d,Ifi205,Bpifb1,Gbp5,Oasl1,Ifi209,Nlrp10,Oas3,Oas1a,Nlrx1,Ifi211,Parp14,Gm12250,Ifi…	66/472
1_Member	GO Biological Processes	GO:0045824	negative regulation of innate immune response	-17.918	-14.6976	11846,14972,15018,15024,15039,15040,15950,15951,16365,20709,20723,20821,20847,21354,22040,23960,63953,73914,80861,93694,96935,100340,110557,226695,236312,246727,246730,270151,381308,547253,100033459,100038882,100040462,100504287	Arg1,H2-K1,H2-Q7,H2-T10,H2-T22,H2-T23,Ifi203,Ifi204,Acod1,Serpinb9f,Serpinb9,Trim21,Stat2,Tap1,Trex1,Oas1g,Dusp10,Irak3,Dhx58,Clec2d,Susd4,Smpdl3b,H2-Q6,Ifi205,Ifi209,Oas3,Oas1a,Nlrx1,Ifi211,Parp14,Ifi208,Isg15,Mndal,Ifi203-ps	34/135
1_Member	GO Biological Processes	GO:0050777	negative regulation of immune response	-17.2496	-14.0669	11622,11846,14776,14972,15018,15024,15039,15040,15950,15951,16190,16365,16854,16952,17174,20709,20723,20821,20847,21354,21946,22040,23960,63953,73914,80861,93694,96935,100340,110557,226695,230738,236312,246727,246730,270151,381308,384997,435653,547253,100033459,100038882,100040462,100504287	Ahr,Arg1,Gpx2,H2-K1,H2-Q7,H2-T10,H2-T22,H2-T23,Ifi203,Ifi204,Il4ra,Acod1,Lgals3,Anxa1,Masp1,Serpinb9f,Serpinb9,Trim21,Stat2,Tap1,Pglyrp1,Trex1,Oas1g,Dusp10,Irak3,Dhx58,Clec2d,Susd4,Smpdl3b,H2-Q6,Ifi205,Zc3h12a,Ifi209,Oas3,Oas1a,Nlrx1,Ifi211,Pglyrp4,Fcrlb,Parp14,Ifi208,Isg15,Mndal,Ifi203-ps	44/240
1_Member	GO Biological Processes	GO:0031348	negative regulation of defense response	-16.4391	-13.2912	11622,11846,12484,14776,14972,15018,15024,15039,15040,15234,15944,15950,15951,16145,16365,19695,20709,20723,20821,20847,21354,21946,22040,23960,54396,56213,63953,67547,73914,80861,93694,96935,100340,107221,110557,210029,226695,230828,232983,236312,246727,246730,270151,381308,547253,100033459,100038882,100040462,100504287	Ahr,Arg1,Cd24a,Gpx2,H2-K1,H2-Q7,H2-T10,H2-T22,H2-T23,Hgf,Irgm1,Ifi203,Ifi204,Igtp,Acod1,Reg3g,Serpinb9f,Serpinb9,Trim21,Stat2,Tap1,Pglyrp1,Trex1,Oas1g,Irgm2,Htra1,Dusp10,Slc39a8,Irak3,Dhx58,Clec2d,Susd4,Smpdl3b,Ffar4,H2-Q6,Metrnl,Ifi205,Il22ra1,Cxcl17,Ifi209,Oas3,Oas1a,Nlrx1,Ifi211,Parp14,Ifi208,Isg15,Mndal,Ifi203-ps	49/309
1_Member	GO Biological Processes	GO:0032102	negative regulation of response to external stimulus	-16.3541	-13.2383	11622,11684,11846,12484,14776,14972,15018,15024,15039,15040,15234,15944,15950,15951,16145,16365,17002,19695,20354,20709,20723,20821,20847,21354,21926,21946,22040,22417,23960,54396,55985,56213,63953,65079,67547,73732,73914,80861,93694,96935,100340,107221,110557,210029,216350,223650,226695,230828,232983,236312,237847,244058,246727,246730,270151,381308,547253,100033459,100038882,100040462,100504287	Ahr,Alox12,Arg1,Cd24a,Gpx2,H2-K1,H2-Q7,H2-T10,H2-T22,H2-T23,Hgf,Irgm1,Ifi203,Ifi204,Igtp,Acod1,Ltf,Reg3g,Sema4d,Serpinb9f,Serpinb9,Trim21,Stat2,Tap1,Tnf,Pglyrp1,Trex1,Wnt4,Oas1g,Irgm2,Cxcl13,Htra1,Dusp10,Rtn4r,Slc39a8,Muc16,Irak3,Dhx58,Clec2d,Susd4,Smpdl3b,Ffar4,H2-Q6,Metrnl,Tspan8,Eppk1,Ifi205,Il22ra1,Cxcl17,Ifi209,Rtn4rl1,Rgma,Oas3,Oas1a,Nlrx1,Ifi211,Parp14,Ifi208,Isg15,Mndal,Ifi203-ps	61/462
1_Member	GO Biological Processes	GO:0050792	regulation of viral process	-15.401	-12.3153	15950,15951,17002,17858,19294,20128,20304,20684,20821,20846,21926,23960,23962,24014,26401,57444,58185,66141,66597,68713,69550,76681,94094,98999,209387,213002,226695,231655,236312,246727,246728,246730,381308,100033459,100038882,100040462,100504287	Ifi203,Ifi204,Ltf,Mx2,Nectin2,Trim30a,Ccl5,Sp100,Trim21,Stat1,Tnf,Oas1g,Oasl2,Rnasel,Map3k1,Isg20,Rsad2,Ifitm3,Trim13,Ifitm1,Bst2,Trim12a,Trim34a,Znfx1,Trim30d,Ifitm6,Ifi205,Oasl1,Ifi209,Oas3,Oas2,Oas1a,Ifi211,Ifi208,Isg15,Mndal,Ifi203-ps	37/191
1_Member	GO Biological Processes	GO:0045069	regulation of viral genome replication	-15.0631	-12.0053	15950,15951,17002,17858,20304,21926,23960,23962,24014,57444,58185,66141,68713,69550,98999,213002,226695,231655,236312,246727,246728,246730,381308,100033459,100038882,100040462,100504287	Ifi203,Ifi204,Ltf,Mx2,Ccl5,Tnf,Oas1g,Oasl2,Rnasel,Isg20,Rsad2,Ifitm3,Ifitm1,Bst2,Znfx1,Ifitm6,Ifi205,Oasl1,Ifi209,Oas3,Oas2,Oas1a,Ifi211,Ifi208,Isg15,Mndal,Ifi203-ps	27/101
1_Member	GO Biological Processes	GO:0032103	positive regulation of response to external stimulus	-14.6507	-11.6288	11501,11846,11876,12266,12363,12484,12773,12803,13032,13143,13614,14082,14205,14972,15018,15024,15039,15040,15944,15945,15950,15951,16145,16173,16365,17002,18003,19294,19695,20128,20304,20963,21926,21934,21983,23960,23993,27419,54123,54396,55985,56312,58185,58203,64074,66824,67313,69146,75697,76681,80285,80861,98999,110557,209387,226695,229898,231655,232983,236312,244202,246727,246730,380705,3813…	Adam8,Arg1,Artn,C3,Casp4,Cd24a,Ccr4,Cntf,Ctsc,Dapk2,Edn1,Fadd,Vegfd,H2-K1,H2-Q7,H2-T10,H2-T22,H2-T23,Irgm1,Cxcl10,Ifi203,Ifi204,Igtp,Il18,Acod1,Ltf,Nedd9,Nectin2,Reg3g,Trim30a,Ccl5,Syk,Tnf,Tnfrsf11a,Tpbg,Oas1g,Klk7,Naglu,Irf7,Irgm2,Cxcl13,Nupr1,Rsad2,Zbp1,Smoc2,Pycard,Inava,Gsdmd,C2cd4b,Trim12a,Parp9,Dhx58,Znfx1,H2-Q6,Trim30d,Ifi205,Gbp5,Oasl1,Cxcl17,Ifi209,Nlrp10,Oas3,Oas1a,Tmem102,Ifi211,Gm1225…	69/617
1_Member	GO Biological Processes	GO:1903900	regulation of viral life cycle	-14.6353	-11.6288	15950,15951,17002,17858,19294,20128,20304,20821,21926,23960,23962,24014,57444,58185,66141,68713,69550,76681,94094,98999,209387,213002,226695,231655,236312,246727,246728,246730,381308,100033459,100038882,100040462,100504287	Ifi203,Ifi204,Ltf,Mx2,Nectin2,Trim30a,Ccl5,Trim21,Tnf,Oas1g,Oasl2,Rnasel,Isg20,Rsad2,Ifitm3,Ifitm1,Bst2,Trim12a,Trim34a,Znfx1,Trim30d,Ifitm6,Ifi205,Oasl1,Ifi209,Oas3,Oas2,Oas1a,Ifi211,Ifi208,Isg15,Mndal,Ifi203-ps	33/160
1_Member	GO Biological Processes	GO:0002833	positive regulation of response to biotic stimulus	-14.0307	-11.091	11501,11846,12363,12484,14082,14972,15018,15024,15039,15040,15944,15950,15951,16145,16365,17002,19294,19695,20128,20963,21926,23960,23993,27419,54123,54396,58185,58203,60533,66824,67313,76681,80285,80861,98999,110557,209387,226695,229898,231655,236312,244202,246727,246730,381308,631323,100033459,100040462,100504287	Adam8,Arg1,Casp4,Cd24a,Fadd,H2-K1,H2-Q7,H2-T10,H2-T22,H2-T23,Irgm1,Ifi203,Ifi204,Igtp,Acod1,Ltf,Nectin2,Reg3g,Trim30a,Syk,Tnf,Oas1g,Klk7,Naglu,Irf7,Irgm2,Rsad2,Zbp1,Cd274,Pycard,Inava,Trim12a,Parp9,Dhx58,Znfx1,H2-Q6,Trim30d,Ifi205,Gbp5,Oasl1,Ifi209,Nlrp10,Oas3,Oas1a,Ifi211,Gm12250,Ifi208,Mndal,Ifi203-ps	49/354
1_Member	GO Biological Processes	GO:0002683	negative regulation of immune system process	-13.9721	-11.0719	11622,11846,12394,12484,14082,14776,14972,15018,15024,15039,15040,15944,15950,15951,16145,16165,16190,16364,16365,16854,16952,17174,18708,20128,20390,20709,20723,20821,20847,21354,21926,21946,22040,22287,23960,26971,54396,60533,63953,67664,68027,69550,73914,80861,93694,96935,100340,107515,110557,226695,228801,230738,236312,246727,246730,270151,381308,384997,434215,435653,547253,100033459,10003888…	Ahr,Arg1,Runx1,Cd24a,Fadd,Gpx2,H2-K1,H2-Q7,H2-T10,H2-T22,H2-T23,Irgm1,Ifi203,Ifi204,Igtp,Il13ra2,Il4ra,Irf4,Acod1,Lgals3,Anxa1,Masp1,Pik3r1,Trim30a,Sftpd,Serpinb9f,Serpinb9,Trim21,Stat2,Tap1,Tnf,Pglyrp1,Trex1,Scgb1a1,Oas1g,Pla2g2f,Irgm2,Cd274,Dusp10,Rnf125,Tmem178,Bst2,Irak3,Dhx58,Clec2d,Susd4,Smpdl3b,Lgr4,H2-Q6,Ifi205,Bpifb1,Zc3h12a,Ifi209,Oas3,Oas1a,Nlrx1,Ifi211,Pglyrp4,Lrrc32,Fcrlb,Parp14,Ifi2…	65/577
1_Member	GO Biological Processes	GO:0031349	positive regulation of defense response	-13.3087	-10.4447	11501,11846,12266,12363,12484,13032,14082,14972,15018,15024,15039,15040,15944,15950,15951,16145,16173,16365,17002,19294,19695,20128,20304,20963,21926,21934,23960,23993,27419,54123,54396,56312,58185,58203,66824,67313,69146,75697,76681,80285,80861,98999,110557,209387,226695,229898,231655,236312,244202,246727,246730,381308,631323,100033459,100040462,100504287	Adam8,Arg1,C3,Casp4,Cd24a,Ctsc,Fadd,H2-K1,H2-Q7,H2-T10,H2-T22,H2-T23,Irgm1,Ifi203,Ifi204,Igtp,Il18,Acod1,Ltf,Nectin2,Reg3g,Trim30a,Ccl5,Syk,Tnf,Tnfrsf11a,Oas1g,Klk7,Naglu,Irf7,Irgm2,Nupr1,Rsad2,Zbp1,Pycard,Inava,Gsdmd,C2cd4b,Trim12a,Parp9,Dhx58,Znfx1,H2-Q6,Trim30d,Ifi205,Gbp5,Oasl1,Ifi209,Nlrp10,Oas3,Oas1a,Ifi211,Gm12250,Ifi208,Mndal,Ifi203-ps	56/465
1_Member	GO Biological Processes	GO:0045089	positive regulation of innate immune response	-12.3134	-9.46652	11501,12363,14082,14972,15018,15024,15039,15040,15944,15950,15951,16145,17002,19294,19695,20128,20963,21926,23960,27419,54123,54396,58185,58203,66824,67313,76681,80285,80861,98999,110557,209387,226695,229898,231655,236312,244202,246727,246730,381308,631323,100033459,100040462,100504287	Adam8,Casp4,Fadd,H2-K1,H2-Q7,H2-T10,H2-T22,H2-T23,Irgm1,Ifi203,Ifi204,Igtp,Ltf,Nectin2,Reg3g,Trim30a,Syk,Tnf,Oas1g,Naglu,Irf7,Irgm2,Rsad2,Zbp1,Pycard,Inava,Trim12a,Parp9,Dhx58,Znfx1,H2-Q6,Trim30d,Ifi205,Gbp5,Oasl1,Ifi209,Nlrp10,Oas3,Oas1a,Ifi211,Gm12250,Ifi208,Mndal,Ifi203-ps	44/325
1_Member	GO Biological Processes	GO:0050778	positive regulation of immune response	-10.6077	-7.83721	11501,12263,12266,12268,12363,12484,14082,14972,15018,15024,15039,15040,15944,15950,15951,16145,16173,16190,16365,16952,17002,17060,17174,19294,19695,20128,20869,20963,21926,22040,23960,23993,27419,54123,54396,58185,58203,60533,66824,67313,69583,76681,80285,80861,98999,101476,110557,209387,226695,229898,230622,230738,231655,232371,236312,244202,246727,246730,329919,381308,631323,639774,100033459,…	Adam8,C2,C3,C4b,Casp4,Cd24a,Fadd,H2-K1,H2-Q7,H2-T10,H2-T22,H2-T23,Irgm1,Ifi203,Ifi204,Igtp,Il18,Il4ra,Acod1,Anxa1,Ltf,Blnk,Masp1,Nectin2,Reg3g,Trim30a,Stk11,Syk,Tnf,Trex1,Oas1g,Klk7,Naglu,Irf7,Irgm2,Rsad2,Zbp1,Cd274,Pycard,Inava,Tnfsf13,Trim12a,Parp9,Dhx58,Znfx1,Plekha1,H2-Q6,Trim30d,Ifi205,Gbp5,Skint6,Zc3h12a,Oasl1,C1rl,Ifi209,Nlrp10,Oas3,Oas1a,Skint2,Ifi211,Gm12250,Skint8,Ifi208,Mndal,Ifi203-ps	65/684
1_Member	GO Biological Processes	GO:0002218	activation of innate immune response	-10.5768	-7.82006	15944,15950,15951,16145,19695,20128,20963,21926,23960,27419,54123,54396,58203,66824,67313,76681,80861,98999,209387,226695,229898,236312,244202,246727,246730,381308,100033459,100040462,100504287	Irgm1,Ifi203,Ifi204,Igtp,Reg3g,Trim30a,Syk,Tnf,Oas1g,Naglu,Irf7,Irgm2,Zbp1,Pycard,Inava,Trim12a,Dhx58,Znfx1,Trim30d,Ifi205,Gbp5,Ifi209,Nlrp10,Oas3,Oas1a,Ifi211,Ifi208,Mndal,Ifi203-ps	29/173
1_Member	GO Biological Processes	GO:0002253	activation of immune response	-10.4717	-7.72838	12263,12266,12268,14972,15018,15944,15950,15951,16145,17060,17174,19695,20128,20869,20963,21926,22040,23960,27419,54123,54396,58203,66824,67313,76681,80861,98999,101476,110557,209387,226695,229898,230622,230738,232371,236312,244202,246727,246730,329919,381308,639774,100033459,100040462,100504287	C2,C3,C4b,H2-K1,H2-Q7,Irgm1,Ifi203,Ifi204,Igtp,Blnk,Masp1,Reg3g,Trim30a,Stk11,Syk,Tnf,Trex1,Oas1g,Naglu,Irf7,Irgm2,Zbp1,Pycard,Inava,Trim12a,Dhx58,Znfx1,Plekha1,H2-Q6,Trim30d,Ifi205,Gbp5,Skint6,Zc3h12a,C1rl,Ifi209,Nlrp10,Oas3,Oas1a,Skint2,Ifi211,Skint8,Ifi208,Mndal,Ifi203-ps	45/382
1_Member	GO Biological Processes	GO:0001819	positive regulation of cytokine production	-10.0693	-7.37567	11501,12266,12363,12394,12759,14082,14205,14972,15018,15024,15039,15040,15234,15950,15951,16173,16175,16190,16364,16952,17196,18708,20304,20846,20963,21926,23960,54123,54448,55991,58185,60533,66412,66824,67313,69146,69677,73914,78317,80861,110557,226695,229898,232983,236312,240725,244202,246727,246728,246730,381308,667034,100033459,100038882,100040462,100504287	Adam8,C3,Casp4,Runx1,Clu,Fadd,Vegfd,H2-K1,H2-Q7,H2-T10,H2-T22,H2-T23,Hgf,Ifi203,Ifi204,Il18,Il1a,Il4ra,Irf4,Anxa1,Mbp,Pik3r1,Ccl5,Stat1,Syk,Tnf,Oas1g,Irf7,Il36a,Panx1,Rsad2,Cd274,Arrdc4,Pycard,Inava,Gsdmd,Il36b,Irak3,Ccdc88b,Dhx58,H2-Q6,Ifi205,Gbp5,Cxcl17,Ifi209,Sulf1,Nlrp10,Oas3,Oas2,Oas1a,Ifi211,Pnp2,Ifi208,Isg15,Mndal,Ifi203-ps	56/559
1_Member	GO Biological Processes	GO:0002698	negative regulation of immune effector process	-8.77559	-6.13698	11622,11846,14972,15018,15024,15039,15040,16165,16190,16854,16952,17174,20709,20723,21354,21926,21946,63953,69550,73914,93694,96935,110557,230738,270151,384997	Ahr,Arg1,H2-K1,H2-Q7,H2-T10,H2-T22,H2-T23,Il13ra2,Il4ra,Lgals3,Anxa1,Masp1,Serpinb9f,Serpinb9,Tap1,Tnf,Pglyrp1,Dusp10,Bst2,Irak3,Clec2d,Susd4,H2-Q6,Zc3h12a,Nlrx1,Pglyrp4	26/168
1_Member	GO Biological Processes	GO:0002697	regulation of immune effector process	-6.70926	-4.25358	11622,11846,12266,12363,12484,14082,14972,15018,15024,15039,15040,16165,16173,16190,16447,16854,16952,17174,19041,19294,20709,20723,20963,21354,21926,21946,22040,23993,55991,58185,63953,66824,67313,69550,69583,73914,80861,93694,96935,110557,230738,270151,384997	Ahr,Arg1,C3,Casp4,Cd24a,Fadd,H2-K1,H2-Q7,H2-T10,H2-T22,H2-T23,Il13ra2,Il18,Il4ra,Ivl,Lgals3,Anxa1,Masp1,Ppl,Nectin2,Serpinb9f,Serpinb9,Syk,Tap1,Tnf,Pglyrp1,Trex1,Klk7,Panx1,Rsad2,Dusp10,Pycard,Inava,Bst2,Tnfsf13,Irak3,Dhx58,Clec2d,Susd4,H2-Q6,Zc3h12a,Nlrx1,Pglyrp4	43/471
2_Summary	GO Biological Processes	GO:0035456	response to interferon-beta	-18.1667	-14.9049	15944,15950,15951,15953,15957,15959,16145,16365,20846,22040,23960,26388,54396,66141,68713,69550,213002,226695,236312,240328,246730,327959,381308,432555,100033459,100040462,12363,16364,17002,18708,20128,54123,58185,67664,73914,80861,100340,107515,228801,229898,231655,270151,631323,100504287,14082,66824,76884,11829,16952,21926,55991,66222,67313,69146,107221,225884,230738,244202,11752,12905,13033,15…	Irgm1,Ifi203,Ifi204,Ifi47,Ifit1,Ifit3,Igtp,Acod1,Stat1,Trex1,Oas1g,Ifi202b,Irgm2,Ifitm3,Ifitm1,Bst2,Ifitm6,Ifi205,Ifi209,F830016B08Rik,Oas1a,Xaf1,Ifi211,Gm5431,Ifi208,Mndal,Casp4,Irf4,Ltf,Pik3r1,Trim30a,Irf7,Rsad2,Rnf125,Irak3,Dhx58,Smpdl3b,Lgr4,Bpifb1,Gbp5,Oasl1,Nlrx1,Gm12250,Ifi203-ps,Fadd,Pycard,Cyfip2,Aqp4,Anxa1,Tnf,Panx1,Serpinb1a,Inava,Gsdmd,Ffar4,Gstp3,Zc3h12a,Nlrp10,Anxa8,Cradd,Ctsd,Hspa1…	159/-
2_Member	GO Biological Processes	GO:0035456	response to interferon-beta	-18.1667	-14.9049	15944,15950,15951,15953,15957,15959,16145,16365,20846,22040,23960,26388,54396,66141,68713,69550,213002,226695,236312,240328,246730,327959,381308,432555,100033459,100040462	Irgm1,Ifi203,Ifi204,Ifi47,Ifit1,Ifit3,Igtp,Acod1,Stat1,Trex1,Oas1g,Ifi202b,Irgm2,Ifitm3,Ifitm1,Bst2,Ifitm6,Ifi205,Ifi209,F830016B08Rik,Oas1a,Xaf1,Ifi211,Gm5431,Ifi208,Mndal	26/72
2_Member	GO Biological Processes	GO:0035458	cellular response to interferon-beta	-13.9821	-11.0719	15944,15950,15951,15953,15957,15959,16145,16365,20846,22040,23960,26388,54396,226695,236312,240328,246730,381308,432555,100033459,100040462	Irgm1,Ifi203,Ifi204,Ifi47,Ifit1,Ifit3,Igtp,Acod1,Stat1,Trex1,Oas1g,Ifi202b,Irgm2,Ifi205,Ifi209,F830016B08Rik,Oas1a,Ifi211,Gm5431,Ifi208,Mndal	21/63
2_Member	GO Biological Processes	GO:0062207	regulation of pattern recognition receptor signaling pathway	-11.9983	-9.16784	12363,15944,15950,15951,16145,16364,16365,17002,18708,20128,22040,54123,54396,58185,67664,73914,80861,100340,107515,226695,228801,229898,231655,236312,270151,381308,631323,100033459,100040462,100504287	Casp4,Irgm1,Ifi203,Ifi204,Igtp,Irf4,Acod1,Ltf,Pik3r1,Trim30a,Trex1,Irf7,Irgm2,Rsad2,Rnf125,Irak3,Dhx58,Smpdl3b,Lgr4,Ifi205,Bpifb1,Gbp5,Oasl1,Ifi209,Nlrx1,Ifi211,Gm12250,Ifi208,Mndal,Ifi203-ps	30/163
2_Member	GO Biological Processes	GO:0140971	regulation of AIM2 inflammasome complex assembly	-10.3288	-7.61099	15950,15951,226695,229898,236312,381308,631323,100033459,100040462,100504287	Ifi203,Ifi204,Ifi205,Gbp5,Ifi209,Ifi211,Gm12250,Ifi208,Mndal,Ifi203-ps	10/16
2_Member	GO Biological Processes	GO:0141086	negative regulation of inflammasome-mediated signaling pathway	-9.74015	-7.05808	15944,15950,15951,16145,20128,54396,226695,236312,381308,100033459,100040462,100504287	Irgm1,Ifi203,Ifi204,Igtp,Trim30a,Irgm2,Ifi205,Ifi209,Ifi211,Ifi208,Mndal,Ifi203-ps	12/28
2_Member	GO Biological Processes	GO:0039532	negative regulation of cytoplasmic pattern recognition receptor signaling pathway	-9.28772	-6.61693	15944,15950,15951,16145,20128,22040,54396,67664,80861,226695,236312,270151,381308,100033459,100040462,100504287	Irgm1,Ifi203,Ifi204,Igtp,Trim30a,Trex1,Irgm2,Rnf125,Dhx58,Ifi205,Ifi209,Nlrx1,Ifi211,Ifi208,Mndal,Ifi203-ps	16/59
2_Member	GO Biological Processes	GO:0097202	activation of cysteine-type endopeptidase activity	-9.12448	-6.46468	14082,15950,15951,66824,76884,226695,236312,381308,100033459,100040462,100504287	Fadd,Ifi203,Ifi204,Pycard,Cyfip2,Ifi205,Ifi209,Ifi211,Ifi208,Mndal,Ifi203-ps	11/25
2_Member	GO Biological Processes	GO:0141085	regulation of inflammasome-mediated signaling pathway	-9.03197	-6.3829	12363,15944,15950,15951,16145,20128,54396,226695,229898,236312,381308,631323,100033459,100040462,100504287	Casp4,Irgm1,Ifi203,Ifi204,Igtp,Trim30a,Irgm2,Ifi205,Gbp5,Ifi209,Ifi211,Gm12250,Ifi208,Mndal,Ifi203-ps	15/53
2_Member	GO Biological Processes	GO:0039531	regulation of cytoplasmic pattern recognition receptor signaling pathway	-8.60108	-5.97269	12363,15944,15950,15951,16145,20128,22040,54396,58185,67664,80861,226695,229898,231655,236312,270151,381308,631323,100033459,100040462,100504287	Casp4,Irgm1,Ifi203,Ifi204,Igtp,Trim30a,Trex1,Irgm2,Rsad2,Rnf125,Dhx58,Ifi205,Gbp5,Oasl1,Ifi209,Nlrx1,Ifi211,Gm12250,Ifi208,Mndal,Ifi203-ps	21/114
2_Member	GO Biological Processes	GO:0032652	regulation of interleukin-1 production	-8.39005	-5.7814	11829,12363,15950,15951,16952,21926,55991,66222,66824,67313,69146,107221,225884,226695,229898,230738,236312,244202,381308,100033459,100040462,100504287	Aqp4,Casp4,Ifi203,Ifi204,Anxa1,Tnf,Panx1,Serpinb1a,Pycard,Inava,Gsdmd,Ffar4,Gstp3,Ifi205,Gbp5,Zc3h12a,Ifi209,Nlrp10,Ifi211,Ifi208,Mndal,Ifi203-ps	22/128
2_Member	GO Biological Processes	GO:0032651	regulation of interleukin-1 beta production	-8.33679	-5.73769	11829,12363,15950,15951,21926,55991,66222,66824,67313,69146,107221,225884,226695,229898,230738,236312,381308,100033459,100040462,100504287	Aqp4,Casp4,Ifi203,Ifi204,Tnf,Panx1,Serpinb1a,Pycard,Inava,Gsdmd,Ffar4,Gstp3,Ifi205,Gbp5,Zc3h12a,Ifi209,Ifi211,Ifi208,Mndal,Ifi203-ps	20/107
2_Member	GO Biological Processes	GO:0140972	negative regulation of AIM2 inflammasome complex assembly	-8.27367	-5.68391	15950,15951,226695,236312,381308,100033459,100040462,100504287	Ifi203,Ifi204,Ifi205,Ifi209,Ifi211,Ifi208,Mndal,Ifi203-ps	8/13
2_Member	GO Biological Processes	GO:0052548	regulation of endopeptidase activity	-7.91889	-5.356	11752,12905,13033,14082,15511,15950,15951,16625,17002,17196,17948,17952,18788,19713,20248,20709,20716,20723,20725,20846,20963,21926,22035,22436,55948,58801,66222,66824,66957,76884,170770,226695,236312,381308,100033459,100040462,100504287	Anxa8,Cradd,Ctsd,Fadd,Hspa1b,Ifi203,Ifi204,Serpina3c,Ltf,Mbp,Naip2,Naip6,Serpinb2,Ret,Serpinb3a,Serpinb9f,Serpina3n,Serpinb9,Serpinb8,Stat1,Syk,Tnf,Tnfsf10,Xdh,Sfn,Pmaip1,Serpinb1a,Pycard,Serpinb11,Cyfip2,Bbc3,Ifi205,Ifi209,Ifi211,Ifi208,Mndal,Ifi203-ps	37/336
2_Member	GO Biological Processes	GO:0031638	zymogen activation	-7.41635	-4.8705	14082,15950,15951,17174,19142,54426,66824,76884,226695,232371,236312,381308,100033459,100040462,100504287	Fadd,Ifi203,Ifi204,Masp1,Prss12,Hgfac,Pycard,Cyfip2,Ifi205,C1rl,Ifi209,Ifi211,Ifi208,Mndal,Ifi203-ps	15/68
2_Member	GO Biological Processes	GO:0052547	regulation of peptidase activity	-7.2651	-4.72752	11752,12740,12905,13033,13601,14082,15511,15950,15951,16625,17002,17196,17948,17952,18788,19713,20248,20709,20716,20723,20725,20732,20846,20963,21926,22035,22436,55948,58801,66222,66824,66957,74116,76884,170770,192200,226695,236312,381308,100033459,100040462,100504287	Anxa8,Cldn4,Cradd,Ctsd,Ecm1,Fadd,Hspa1b,Ifi203,Ifi204,Serpina3c,Ltf,Mbp,Naip2,Naip6,Serpinb2,Ret,Serpinb3a,Serpinb9f,Serpina3n,Serpinb9,Serpinb8,Spint1,Stat1,Syk,Tnf,Tnfsf10,Xdh,Sfn,Pmaip1,Serpinb1a,Pycard,Serpinb11,Pi16,Cyfip2,Bbc3,Wfdc12,Ifi205,Ifi209,Ifi211,Ifi208,Mndal,Ifi203-ps	42/434
2_Member	GO Biological Processes	GO:0032731	positive regulation of interleukin-1 beta production	-7.23653	-4.70706	12363,15950,15951,21926,55991,66824,67313,69146,226695,229898,236312,381308,100033459,100040462,100504287	Casp4,Ifi203,Ifi204,Tnf,Panx1,Pycard,Inava,Gsdmd,Ifi205,Gbp5,Ifi209,Ifi211,Ifi208,Mndal,Ifi203-ps	15/70
2_Member	GO Biological Processes	GO:0032732	positive regulation of interleukin-1 production	-7.0695	-4.57107	12363,15950,15951,21926,55991,66824,67313,69146,226695,229898,236312,244202,381308,100033459,100040462,100504287	Casp4,Ifi203,Ifi204,Tnf,Panx1,Pycard,Inava,Gsdmd,Ifi205,Gbp5,Ifi209,Nlrp10,Ifi211,Ifi208,Mndal,Ifi203-ps	16/82
2_Member	GO Biological Processes	GO:0010951	negative regulation of endopeptidase activity	-7.01562	-4.52461	11752,15511,15950,15951,16625,17002,17948,17952,18788,20248,20709,20716,20723,20725,21926,55948,66222,66957,226695,236312,381308,100033459,100040462,100504287	Anxa8,Hspa1b,Ifi203,Ifi204,Serpina3c,Ltf,Naip2,Naip6,Serpinb2,Serpinb3a,Serpinb9f,Serpina3n,Serpinb9,Serpinb8,Tnf,Sfn,Serpinb1a,Serpinb11,Ifi205,Ifi209,Ifi211,Ifi208,Mndal,Ifi203-ps	24/177
2_Member	GO Biological Processes	GO:0072332	intrinsic apoptotic signaling pathway by p53 class mediator	-6.48325	-4.06024	15950,15951,20869,22062,56312,58801,66824,170770,226695,236312,381308,100033459,100040462,100504287	Ifi203,Ifi204,Stk11,Trp73,Nupr1,Pmaip1,Pycard,Bbc3,Ifi205,Ifi209,Ifi211,Ifi208,Mndal,Ifi203-ps	14/69
2_Member	GO Biological Processes	GO:0010466	negative regulation of peptidase activity	-6.26078	-3.88431	11752,13601,15511,15950,15951,16625,17002,17948,17952,18788,20248,20709,20716,20723,20725,20732,21926,55948,66222,66957,74116,192200,226695,236312,381308,100033459,100040462,100504287	Anxa8,Ecm1,Hspa1b,Ifi203,Ifi204,Serpina3c,Ltf,Naip2,Naip6,Serpinb2,Serpinb3a,Serpinb9f,Serpina3n,Serpinb9,Serpinb8,Spint1,Tnf,Sfn,Serpinb1a,Serpinb11,Pi16,Wfdc12,Ifi205,Ifi209,Ifi211,Ifi208,Mndal,Ifi203-ps	28/251
2_Member	GO Biological Processes	GO:0072331	signal transduction by p53 class mediator	-6.15237	-3.78261	12905,15950,15951,20684,20869,22062,56312,58801,66824,170770,226695,236312,381308,100033459,100040462,100504287	Cradd,Ifi203,Ifi204,Sp100,Stk11,Trp73,Nupr1,Pmaip1,Pycard,Bbc3,Ifi205,Ifi209,Ifi211,Ifi208,Mndal,Ifi203-ps	16/95
2_Member	GO Biological Processes	GO:0042149	cellular response to glucose starvation	-5.9998	-3.63557	15950,15951,58801,74137,108079,226695,230738,236312,381308,100033459,100040462,100504287	Ifi203,Ifi204,Pmaip1,Nuak2,Prkaa2,Ifi205,Zc3h12a,Ifi209,Ifi211,Ifi208,Mndal,Ifi203-ps	12/55
2_Member	GO Biological Processes	GO:2000117	negative regulation of cysteine-type endopeptidase activity	-5.28052	-2.99179	15511,15950,15951,17002,17948,17952,21926,55948,226695,236312,381308,100033459,100040462,100504287	Hspa1b,Ifi203,Ifi204,Ltf,Naip2,Naip6,Tnf,Sfn,Ifi205,Ifi209,Ifi211,Ifi208,Mndal,Ifi203-ps	14/86
2_Member	GO Biological Processes	GO:0030224	monocyte differentiation	-5.24695	-2.97632	15950,15951,226695,236312,381308,100033459,100040462,100504287	Ifi203,Ifi204,Ifi205,Ifi209,Ifi211,Ifi208,Mndal,Ifi203-ps	8/27
2_Member	GO Biological Processes	GO:0016485	protein processing	-4.79107	-2.61199	12363,12876,14082,15950,15951,16790,17174,19142,27419,54426,56175,66824,67855,76884,226695,230857,232371,236312,381308,626834,100033459,100040462,100504287	Casp4,Cpe,Fadd,Ifi203,Ifi204,Anpep,Masp1,Prss12,Naglu,Hgfac,Bace2,Pycard,Asprv1,Cyfip2,Ifi205,Ece1,C1rl,Ifi209,Ifi211,Klk13,Ifi208,Mndal,Ifi203-ps	23/220
2_Member	GO Biological Processes	GO:0002573	myeloid leukocyte differentiation	-4.77027	-2.59477	11501,12156,12394,15950,15951,16364,18708,19664,21926,21934,22228,24108,27419,226695,236312,320910,381308,100033459,100040462,100504287	Adam8,Bmp2,Runx1,Ifi203,Ifi204,Irf4,Pik3r1,Rbpj,Tnf,Tnfrsf11a,Ucp2,Ubd,Naglu,Ifi205,Ifi209,Itgb8,Ifi211,Ifi208,Mndal,Ifi203-ps	20/176
2_Member	GO Biological Processes	GO:0030162	regulation of proteolysis	-4.48802	-2.36918	11501,11752,12740,12759,12795,12905,13032,13033,13601,14082,15511,15950,15951,16625,17002,17196,17948,17952,18708,18788,19713,20248,20709,20716,20723,20725,20732,20846,20963,21922,21926,22035,22436,55948,56312,58801,66222,66824,66957,68545,74116,76884,170770,192200,212167,226695,236312,244058,381308,100033459,100040462,100504287	Adam8,Anxa8,Cldn4,Clu,Plk3,Cradd,Ctsc,Ctsd,Ecm1,Fadd,Hspa1b,Ifi203,Ifi204,Serpina3c,Ltf,Mbp,Naip2,Naip6,Pik3r1,Serpinb2,Ret,Serpinb3a,Serpinb9f,Serpina3n,Serpinb9,Serpinb8,Spint1,Stat1,Syk,Clec3b,Tnf,Tnfsf10,Xdh,Sfn,Nupr1,Pmaip1,Serpinb1a,Pycard,Serpinb11,Ecscr,Pi16,Cyfip2,Bbc3,Wfdc12,Gsap,Ifi205,Ifi209,Rgma,Ifi211,Ifi208,Mndal,Ifi203-ps	52/745
2_Member	GO Biological Processes	GO:0051346	negative regulation of hydrolase activity	-4.44354	-2.33397	11752,13601,15511,15950,15951,16625,17002,17948,17952,18788,20248,20709,20716,20723,20725,20732,21926,55948,66222,66957,72112,74116,192200,226695,236312,381308,100033459,100040462,100504287	Anxa8,Ecm1,Hspa1b,Ifi203,Ifi204,Serpina3c,Ltf,Naip2,Naip6,Serpinb2,Serpinb3a,Serpinb9f,Serpina3n,Serpinb9,Serpinb8,Spint1,Tnf,Sfn,Serpinb1a,Serpinb11,Ppp1r14d,Pi16,Wfdc12,Ifi205,Ifi209,Ifi211,Ifi208,Mndal,Ifi203-ps	29/329
2_Member	GO Biological Processes	GO:0043392	negative regulation of DNA binding	-4.3621	-2.27386	15901,15950,15951,20684,226695,236312,381308,100033459,100040462,100504287	Id1,Ifi203,Ifi204,Sp100,Ifi205,Ifi209,Ifi211,Ifi208,Mndal,Ifi203-ps	10/55
2_Member	GO Biological Processes	GO:0045861	negative regulation of proteolysis	-3.83652	-1.8757	11752,13601,15511,15950,15951,16625,17002,17948,17952,18708,18788,20248,20709,20716,20723,20725,20732,21926,55948,66222,66957,74116,192200,226695,236312,381308,100033459,100040462,100504287	Anxa8,Ecm1,Hspa1b,Ifi203,Ifi204,Serpina3c,Ltf,Naip2,Naip6,Pik3r1,Serpinb2,Serpinb3a,Serpinb9f,Serpina3n,Serpinb9,Serpinb8,Spint1,Tnf,Sfn,Serpinb1a,Serpinb11,Pi16,Wfdc12,Ifi205,Ifi209,Ifi211,Ifi208,Mndal,Ifi203-ps	29/356
2_Member	GO Biological Processes	GO:0097190	apoptotic signaling pathway	-3.76136	-1.81126	12484,12507,12759,12905,14082,15950,15951,16173,16175,18708,20869,21926,22062,22337,22417,55948,56312,58801,66824,76933,80797,170770,226695,236312,381308,100033459,100040462,100504287	Cd24a,Cd5,Clu,Cradd,Fadd,Ifi203,Ifi204,Il18,Il1a,Pik3r1,Stk11,Tnf,Trp73,Vdr,Wnt4,Sfn,Nupr1,Pmaip1,Pycard,Ifi27l2a,Clca3a2,Bbc3,Ifi205,Ifi209,Ifi211,Ifi208,Mndal,Ifi203-ps	28/342
2_Member	GO Biological Processes	GO:0097193	intrinsic apoptotic signaling pathway	-3.38023	-1.54325	12759,15950,15951,18708,20869,21926,22062,55948,56312,58801,66824,170770,226695,236312,381308,100033459,100040462,100504287	Clu,Ifi203,Ifi204,Pik3r1,Stk11,Tnf,Trp73,Sfn,Nupr1,Pmaip1,Pycard,Bbc3,Ifi205,Ifi209,Ifi211,Ifi208,Mndal,Ifi203-ps	18/189
2_Member	GO Biological Processes	GO:0002521	leukocyte differentiation	-3.29558	-1.4831	11501,11622,12156,12394,12484,14082,14256,14369,14370,15950,15951,16145,16190,16364,16952,17068,18708,19664,20869,20963,21926,21934,22228,22417,24108,27419,58185,58208,226695,236312,320910,381308,100033459,100040462,100504287	Adam8,Ahr,Bmp2,Runx1,Cd24a,Fadd,Flt3l,Fzd7,Fzd8,Ifi203,Ifi204,Igtp,Il4ra,Irf4,Anxa1,Ly6d,Pik3r1,Rbpj,Stk11,Syk,Tnf,Tnfrsf11a,Ucp2,Wnt4,Ubd,Naglu,Rsad2,Bcl11b,Ifi205,Ifi209,Itgb8,Ifi211,Ifi208,Mndal,Ifi203-ps	35/496
2_Member	GO Biological Processes	GO:0031333	negative regulation of protein-containing complex assembly	-3.21171	-1.43273	12759,15944,15950,15951,16145,20128,20259,54396,93677,226695,236312,327959,381308,100033459,100040462,100504287	Clu,Irgm1,Ifi203,Ifi204,Igtp,Trim30a,Scin,Irgm2,Lmod2,Ifi205,Ifi209,Xaf1,Ifi211,Ifi208,Mndal,Ifi203-ps	16/163
2_Member	GO Biological Processes	GO:0051101	regulation of DNA binding	-3.07598	-1.33917	15901,15950,15951,16364,17300,20684,207259,226695,236312,381308,100033459,100040462,100504287	Id1,Ifi203,Ifi204,Irf4,Foxc1,Sp100,Zbtb7c,Ifi205,Ifi209,Ifi211,Ifi208,Mndal,Ifi203-ps	13/121
2_Member	GO Biological Processes	GO:0043086	negative regulation of catalytic activity	-2.96075	-1.26356	11752,12156,13601,15511,15950,15951,16625,17002,17948,17952,18788,20248,20459,20709,20716,20723,20725,20732,21926,26889,55948,63953,66222,66824,66957,72112,73914,74116,80285,84111,192200,209200,225884,226695,236312,381308,100033459,100040462,100504287	Anxa8,Bmp2,Ecm1,Hspa1b,Ifi203,Ifi204,Serpina3c,Ltf,Naip2,Naip6,Serpinb2,Serpinb3a,Ptk6,Serpinb9f,Serpina3n,Serpinb9,Serpinb8,Spint1,Tnf,Cln8,Sfn,Dusp10,Serpinb1a,Pycard,Serpinb11,Ppp1r14d,Irak3,Pi16,Parp9,Gpr87,Wfdc12,Dtx3l,Gstp3,Ifi205,Ifi209,Ifi211,Ifi208,Mndal,Ifi203-ps	39/597
2_Member	GO Biological Processes	GO:0071479	cellular response to ionizing radiation	-2.86517	-1.19438	15950,15951,22040,170770,226695,236312,381308,100033459,100040462,100504287	Ifi203,Ifi204,Trex1,Bbc3,Ifi205,Ifi209,Ifi211,Ifi208,Mndal,Ifi203-ps	10/83
2_Member	GO Biological Processes	GO:0030099	myeloid cell differentiation	-2.77406	-1.13025	11501,12156,12394,13819,15950,15951,16364,16535,18708,19664,21926,21934,22228,24108,27419,78249,106722,226419,226695,236312,320910,381308,100033459,100040462,100504287	Adam8,Bmp2,Runx1,Epas1,Ifi203,Ifi204,Irf4,Kcnq1,Pik3r1,Rbpj,Tnf,Tnfrsf11a,Ucp2,Ubd,Naglu,Adgrf4,Mpig6b,Dyrk3,Ifi205,Ifi209,Itgb8,Ifi211,Ifi208,Mndal,Ifi203-ps	25/339
2_Member	GO Biological Processes	GO:1903131	mononuclear cell differentiation	-2.73335	-1.10798	11622,12484,14082,14256,14369,14370,15950,15951,16145,16190,16364,16952,17068,18708,19664,20869,20963,22417,24108,58185,58208,226695,236312,320910,381308,100033459,100040462,100504287	Ahr,Cd24a,Fadd,Flt3l,Fzd7,Fzd8,Ifi203,Ifi204,Igtp,Il4ra,Irf4,Anxa1,Ly6d,Pik3r1,Rbpj,Stk11,Syk,Wnt4,Ubd,Rsad2,Bcl11b,Ifi205,Ifi209,Itgb8,Ifi211,Ifi208,Mndal,Ifi203-ps	28/398
2_Member	GO Biological Processes	GO:0051604	protein maturation	-2.29199	-0.756862	12363,12759,12876,14082,15511,15512,15950,15951,16790,17174,19142,27419,54426,56175,66824,67855,72726,76884,81489,226695,227638,230857,232371,236312,381308,623661,626834,100033459,100040462,100504287	Casp4,Clu,Cpe,Fadd,Hspa1b,Hspa2,Ifi203,Ifi204,Anpep,Masp1,Prss12,Naglu,Hgfac,Bace2,Pycard,Asprv1,Tbcc,Cyfip2,Dnajb1,Ifi205,Qsox2,Ece1,C1rl,Ifi209,Ifi211,Lipt1,Klk13,Ifi208,Mndal,Ifi203-ps	30/468
2_Member	GO Biological Processes	GO:0071478	cellular response to radiation	-2.19961	-0.689805	15950,15951,18708,20869,22040,64378,66647,69327,170770,226695,236312,381308,100033459,100040462,100504287	Ifi203,Ifi204,Pik3r1,Stk11,Trex1,Gpr88,Nsmce3,Pierce1,Bbc3,Ifi205,Ifi209,Ifi211,Ifi208,Mndal,Ifi203-ps	15/187
2_Member	GO Biological Processes	GO:0051100	negative regulation of binding	-2.04188	-0.579137	11555,15901,15950,15951,15958,20684,226695,236312,244058,381308,100033459,100040462,100504287	Adrb2,Id1,Ifi203,Ifi204,Ifit2,Sp100,Ifi205,Ifi209,Rgma,Ifi211,Ifi208,Mndal,Ifi203-ps	13/159
2_Member	GO Biological Processes	GO:0010212	response to ionizing radiation	-2.03158	-0.571809	15950,15951,20869,22040,58801,170770,226695,236312,381308,100033459,100040462,100504287	Ifi203,Ifi204,Stk11,Trex1,Pmaip1,Bbc3,Ifi205,Ifi209,Ifi211,Ifi208,Mndal,Ifi203-ps	12/142
3_Summary	GO Biological Processes	GO:0043588	skin development	-14.3444	-11.3613	11684,12394,12560,12614,12740,14160,15220,16173,16175,16447,16664,16682,16939,16952,19041,19664,20753,20754,20756,20758,20761,20762,21818,22409,27419,55948,58208,64929,66042,66705,67855,67859,72383,74127,74591,107515,171168,214922,223917,232077,240025,319530,320051,332131,406219,433091,16535,20732,73720,78405,140476,317653,12156,12484,12945,13614,13819,14366,14369,15901,16665,17292,17356,20459,22…	Alox12,Runx1,Cdh3,Celsr1,Cldn4,Lgr5,Foxq1,Il18,Il1a,Ivl,Krt14,Krt4,Loricrin,Anxa1,Ppl,Rbpj,Sprr1a,Sprr1b,Sprr2b,Sprr2d,Sprr2g,Sprr2h,Tgm3,Wnt10a,Naglu,Sfn,Bcl11b,Scel,Sostdc1,Dnase1l2,Asprv1,Cysrt1,Cnfn,Krt80,Abca12,Lgr4,Acer1,Slc39a2,Krt79,Foxi3,Dact2,Zfp750,Exph5,Krt78,Krt87,Pnpla1,Kcnq1,Spint1,Cst6,Ntf5,Strc,Klk14,Bmp2,Cd24a,Dmbt1,Edn1,Epas1,Fzd4,Fzd7,Id1,Krt15,Mesp1,Afdn,Ptk6,Tst,Wnt4,Map3k1,…	73/-
3_Member	GO Biological Processes	GO:0043588	skin development	-14.3444	-11.3613	11684,12394,12560,12614,12740,14160,15220,16173,16175,16447,16664,16682,16939,16952,19041,19664,20753,20754,20756,20758,20761,20762,21818,22409,27419,55948,58208,64929,66042,66705,67855,67859,72383,74127,74591,107515,171168,214922,223917,232077,240025,319530,320051,332131,406219,433091	Alox12,Runx1,Cdh3,Celsr1,Cldn4,Lgr5,Foxq1,Il18,Il1a,Ivl,Krt14,Krt4,Loricrin,Anxa1,Ppl,Rbpj,Sprr1a,Sprr1b,Sprr2b,Sprr2d,Sprr2g,Sprr2h,Tgm3,Wnt10a,Naglu,Sfn,Bcl11b,Scel,Sostdc1,Dnase1l2,Asprv1,Cysrt1,Cnfn,Krt80,Abca12,Lgr4,Acer1,Slc39a2,Krt79,Foxi3,Dact2,Zfp750,Exph5,Krt78,Krt87,Pnpla1	46/310
3_Member	GO Biological Processes	GO:0008544	epidermis development	-14.1283	-11.1675	11684,12394,12560,12614,12740,14160,15220,16173,16175,16447,16535,16664,16682,16939,16952,19041,19664,20732,20753,20754,20756,20758,20761,20762,21818,22409,27419,55948,58208,64929,66042,66705,67859,72383,73720,74127,74591,78405,107515,140476,214922,223917,232077,317653,319530,320051,332131,406219,433091	Alox12,Runx1,Cdh3,Celsr1,Cldn4,Lgr5,Foxq1,Il18,Il1a,Ivl,Kcnq1,Krt14,Krt4,Loricrin,Anxa1,Ppl,Rbpj,Spint1,Sprr1a,Sprr1b,Sprr2b,Sprr2d,Sprr2g,Sprr2h,Tgm3,Wnt10a,Naglu,Sfn,Bcl11b,Scel,Sostdc1,Dnase1l2,Cysrt1,Cnfn,Cst6,Krt80,Abca12,Ntf5,Lgr4,Strc,Slc39a2,Krt79,Foxi3,Klk14,Zfp750,Exph5,Krt78,Krt87,Pnpla1	49/352
3_Member	GO Biological Processes	GO:0030216	keratinocyte differentiation	-13.5103	-10.6287	12560,16175,16447,16664,16682,16939,16952,19041,19664,20753,20754,20756,20758,20761,20762,21818,55948,58208,64929,66705,72383,74127,74591,214922,223917,320051,332131,406219,433091	Cdh3,Il1a,Ivl,Krt14,Krt4,Loricrin,Anxa1,Ppl,Rbpj,Sprr1a,Sprr1b,Sprr2b,Sprr2d,Sprr2g,Sprr2h,Tgm3,Sfn,Bcl11b,Scel,Dnase1l2,Cnfn,Krt80,Abca12,Slc39a2,Krt79,Exph5,Krt78,Krt87,Pnpla1	29/134
3_Member	GO Biological Processes	GO:0031424	keratinization	-11.3287	-8.51399	12560,16175,16682,16939,19041,20753,20754,20756,20758,20762,21818,55948,72383,74127,74591,223917,332131,406219	Cdh3,Il1a,Krt4,Loricrin,Ppl,Sprr1a,Sprr1b,Sprr2b,Sprr2d,Sprr2h,Tgm3,Sfn,Cnfn,Krt80,Abca12,Krt79,Krt78,Krt87	18/59
3_Member	GO Biological Processes	GO:0009913	epidermal cell differentiation	-10.3596	-7.62918	12560,16175,16447,16535,16664,16682,16939,16952,19041,19664,20753,20754,20756,20758,20761,20762,21818,55948,58208,64929,66705,72383,74127,74591,140476,214922,223917,232077,320051,332131,406219,433091	Cdh3,Il1a,Ivl,Kcnq1,Krt14,Krt4,Loricrin,Anxa1,Ppl,Rbpj,Sprr1a,Sprr1b,Sprr2b,Sprr2d,Sprr2g,Sprr2h,Tgm3,Sfn,Bcl11b,Scel,Dnase1l2,Cnfn,Krt80,Abca12,Strc,Slc39a2,Krt79,Foxi3,Exph5,Krt78,Krt87,Pnpla1	32/212
3_Member	GO Biological Processes	GO:0030855	epithelial cell differentiation	-7.19689	-4.6754	12156,12484,12560,12945,13614,13819,14366,14369,15901,16175,16447,16535,16664,16665,16682,16939,16952,17292,17356,19041,19664,20459,20753,20754,20756,20758,20761,20762,21818,22117,22417,26401,55948,58208,64929,66042,66705,72383,74127,74591,76943,94179,94192,105083,140476,214922,218772,223917,225845,232077,240025,320051,332131,406219,433091	Bmp2,Cd24a,Cdh3,Dmbt1,Edn1,Epas1,Fzd4,Fzd7,Id1,Il1a,Ivl,Kcnq1,Krt14,Krt15,Krt4,Loricrin,Anxa1,Mesp1,Afdn,Ppl,Rbpj,Ptk6,Sprr1a,Sprr1b,Sprr2b,Sprr2d,Sprr2g,Sprr2h,Tgm3,Tst,Wnt4,Map3k1,Sfn,Bcl11b,Scel,Sostdc1,Dnase1l2,Cnfn,Krt80,Abca12,Psapl1,Krt23,C1galt1,Pelo,Strc,Slc39a2,Rarb,Krt79,Plaat3,Foxi3,Dact2,Exph5,Krt78,Krt87,Pnpla1	55/654
4_Summary	GO Biological Processes	GO:0042742	defense response to bacterium	-11.2276	-8.42818	11727,12363,12945,13214,14972,15018,15024,15039,15040,15944,16145,16173,17002,17948,17952,18489,18843,19664,19695,19752,20723,20963,21926,21946,23960,54159,54396,55985,57911,66824,69146,76074,98999,110557,116746,192200,209232,229898,230828,231507,236573,246727,246728,246730,384997,626578,631323,100038882,11891,12266,13032,15945,16854,56066,74732,100039863,12263,12268,17174,232371,12759,228801	Ang,Casp4,Dmbt1,Defb1,H2-K1,H2-Q7,H2-T10,H2-T22,H2-T23,Irgm1,Igtp,Il18,Ltf,Naip2,Naip6,Reg3b,Bpifa1,Rbpj,Reg3g,Rnase1,Serpinb9,Syk,Tnf,Pglyrp1,Oas1g,Rnase2b,Irgm2,Cxcl13,Gsdma,Pycard,Gsdmd,Gbp8,Znfx1,H2-Q6,Defb6,Wfdc12,Wfdc5,Gbp5,Il22ra1,Plac8,Gbp9,Oas3,Oas2,Oas1a,Pglyrp4,Gbp10,Gm12250,Isg15,Rab27a,C3,Ctsc,Cxcl10,Lgals3,Cxcl11,Stx11,Ccl27al,C2,C4b,Masp1,C1rl,Clu,Bpifb1	62/-
4_Member	GO Biological Processes	GO:0042742	defense response to bacterium	-11.2276	-8.42818	11727,12363,12945,13214,14972,15018,15024,15039,15040,15944,16145,16173,17002,17948,17952,18489,18843,19664,19695,19752,20723,20963,21926,21946,23960,54159,54396,55985,57911,66824,69146,76074,98999,110557,116746,192200,209232,229898,230828,231507,236573,246727,246728,246730,384997,626578,631323,100038882	Ang,Casp4,Dmbt1,Defb1,H2-K1,H2-Q7,H2-T10,H2-T22,H2-T23,Irgm1,Igtp,Il18,Ltf,Naip2,Naip6,Reg3b,Bpifa1,Rbpj,Reg3g,Rnase1,Serpinb9,Syk,Tnf,Pglyrp1,Oas1g,Rnase2b,Irgm2,Cxcl13,Gsdma,Pycard,Gsdmd,Gbp8,Znfx1,H2-Q6,Defb6,Wfdc12,Wfdc5,Gbp5,Il22ra1,Plac8,Gbp9,Oas3,Oas2,Oas1a,Pglyrp4,Gbp10,Gm12250,Isg15	48/405
4_Member	GO Biological Processes	GO:0001906	cell killing	-6.49648	-4.06713	11891,12266,13032,14972,15018,15040,15945,16145,16173,16854,17002,20723,21946,54396,55985,56066,74732,110557,229898,384997,631323,100039863	Rab27a,C3,Ctsc,H2-K1,H2-Q7,H2-T23,Cxcl10,Igtp,Il18,Lgals3,Ltf,Serpinb9,Pglyrp1,Irgm2,Cxcl13,Cxcl11,Stx11,H2-Q6,Gbp5,Pglyrp4,Gm12250,Ccl27al	22/162
4_Member	GO Biological Processes	GO:0050830	defense response to Gram-positive bacterium	-5.98371	-3.62495	11727,12363,12945,13214,14972,15018,15024,15039,15040,16173,17002,18489,19695,19752,21926,21946,54159,66824,69146,76074,110557,236573,384997,626578	Ang,Casp4,Dmbt1,Defb1,H2-K1,H2-Q7,H2-T10,H2-T22,H2-T23,Il18,Ltf,Reg3b,Reg3g,Rnase1,Tnf,Pglyrp1,Rnase2b,Pycard,Gsdmd,Gbp8,H2-Q6,Gbp9,Pglyrp4,Gbp10	24/201
4_Member	GO Biological Processes	GO:0006959	humoral immune response	-5.08766	-2.83864	11727,12263,12266,12268,12945,13214,14972,15018,15024,15039,15040,15945,16854,17002,17174,18489,18843,19664,19695,21926,21946,55985,56066,110557,192200,209232,232371,384997,100039863	Ang,C2,C3,C4b,Dmbt1,Defb1,H2-K1,H2-Q7,H2-T10,H2-T22,H2-T23,Cxcl10,Lgals3,Ltf,Masp1,Reg3b,Bpifa1,Rbpj,Reg3g,Tnf,Pglyrp1,Cxcl13,Cxcl11,H2-Q6,Wfdc12,Wfdc5,C1rl,Pglyrp4,Ccl27al	29/304
4_Member	GO Biological Processes	GO:0019730	antimicrobial humoral response	-4.62377	-2.47918	11727,12945,13214,14972,15018,15024,15039,15040,15945,16854,17002,18489,18843,19695,21946,55985,56066,110557,192200,209232,384997,100039863	Ang,Dmbt1,Defb1,H2-K1,H2-Q7,H2-T10,H2-T22,H2-T23,Cxcl10,Lgals3,Ltf,Reg3b,Bpifa1,Reg3g,Pglyrp1,Cxcl13,Cxcl11,H2-Q6,Wfdc12,Wfdc5,Pglyrp4,Ccl27al	22/210
4_Member	GO Biological Processes	GO:0031640	killing of cells of another organism	-3.31245	-1.49401	15945,16145,16854,17002,21946,54396,55985,56066,229898,384997,631323,100039863	Cxcl10,Igtp,Lgals3,Ltf,Pglyrp1,Irgm2,Cxcl13,Cxcl11,Gbp5,Pglyrp4,Gm12250,Ccl27al	12/100
4_Member	GO Biological Processes	GO:0141061	disruption of cell in another organism	-3.31245	-1.49401	15945,16145,16854,17002,21946,54396,55985,56066,229898,384997,631323,100039863	Cxcl10,Igtp,Lgals3,Ltf,Pglyrp1,Irgm2,Cxcl13,Cxcl11,Gbp5,Pglyrp4,Gm12250,Ccl27al	12/100
4_Member	GO Biological Processes	GO:0061844	antimicrobial humoral immune response mediated by antimicrobial peptide	-2.81258	-1.15387	11727,12945,13214,15945,16854,17002,18489,18843,19695,21946,55985,56066,384997,100039863	Ang,Dmbt1,Defb1,Cxcl10,Lgals3,Ltf,Reg3b,Bpifa1,Reg3g,Pglyrp1,Cxcl13,Cxcl11,Pglyrp4,Ccl27al	14/145
4_Member	GO Biological Processes	GO:0019731	antibacterial humoral response	-2.75781	-1.11713	11727,12945,13214,14972,15018,15024,15039,15040,17002,18843,110557,192200,209232	Ang,Dmbt1,Defb1,H2-K1,H2-Q7,H2-T10,H2-T22,H2-T23,Ltf,Bpifa1,H2-Q6,Wfdc12,Wfdc5	13/131
4_Member	Reactome Gene Sets	R-MMU-6803157	Antimicrobial peptides	-2.09117	-0.61535	12759,13214,17002,18489,18843,19695,21946,228801,384997	Clu,Defb1,Ltf,Reg3b,Bpifa1,Reg3g,Pglyrp1,Bpifb1,Pglyrp4	9/90
4_Member	GO Biological Processes	GO:0141060	disruption of anatomical structure in another organism	-2.07842	-0.60895	15945,16145,16854,17002,21946,54396,55985,56066,229898,384997,631323,100039863	Cxcl10,Igtp,Lgals3,Ltf,Pglyrp1,Irgm2,Cxcl13,Cxcl11,Gbp5,Pglyrp4,Gm12250,Ccl27al	12/140
5_Summary	GO Biological Processes	GO:0001959	regulation of cytokine-mediated signaling pathway	-10.77	-7.98527	11846,12363,12484,13601,13614,14082,15944,16145,16181,17948,17952,20847,20963,22040,23960,54123,54396,58203,66381,66824,69942,73914,80285,246727,246730,547253,100038882	Arg1,Casp4,Cd24a,Ecm1,Edn1,Fadd,Irgm1,Igtp,Il1rn,Naip2,Naip6,Stat2,Syk,Trex1,Oas1g,Irf7,Irgm2,Zbp1,Rnf113a2,Pycard,Rnf113a1,Irak3,Parp9,Oas3,Oas1a,Parp14,Isg15	27/-
5_Member	GO Biological Processes	GO:0001959	regulation of cytokine-mediated signaling pathway	-10.77	-7.98527	11846,12363,12484,13601,13614,14082,15944,16145,16181,17948,17952,20847,20963,22040,23960,54123,54396,58203,66381,66824,69942,73914,80285,246727,246730,547253,100038882	Arg1,Casp4,Cd24a,Ecm1,Edn1,Fadd,Irgm1,Igtp,Il1rn,Naip2,Naip6,Stat2,Syk,Trex1,Oas1g,Irf7,Irgm2,Zbp1,Rnf113a2,Pycard,Rnf113a1,Irak3,Parp9,Oas3,Oas1a,Parp14,Isg15	27/148
5_Member	GO Biological Processes	GO:0060759	regulation of response to cytokine stimulus	-10.0893	-7.38374	11846,12363,12484,13601,13614,14082,15944,16145,16181,17948,17952,20847,20963,22040,23960,54123,54396,58203,66381,66824,69942,73914,80285,246727,246730,547253,100038882	Arg1,Casp4,Cd24a,Ecm1,Edn1,Fadd,Irgm1,Igtp,Il1rn,Naip2,Naip6,Stat2,Syk,Trex1,Oas1g,Irf7,Irgm2,Zbp1,Rnf113a2,Pycard,Rnf113a1,Irak3,Parp9,Oas3,Oas1a,Parp14,Isg15	27/158
5_Member	GO Biological Processes	GO:0001960	negative regulation of cytokine-mediated signaling pathway	-6.57985	-4.14407	11846,13601,16181,17948,17952,20847,22040,23960,66381,69942,73914,246727,246730,547253,100038882	Arg1,Ecm1,Il1rn,Naip2,Naip6,Stat2,Trex1,Oas1g,Rnf113a2,Rnf113a1,Irak3,Oas3,Oas1a,Parp14,Isg15	15/78
5_Member	GO Biological Processes	GO:0060761	negative regulation of response to cytokine stimulus	-6.28418	-3.89738	11846,13601,16181,17948,17952,20847,22040,23960,66381,69942,73914,246727,246730,547253,100038882	Arg1,Ecm1,Il1rn,Naip2,Naip6,Stat2,Trex1,Oas1g,Rnf113a2,Rnf113a1,Irak3,Oas3,Oas1a,Parp14,Isg15	15/82
6_Summary	GO Biological Processes	GO:0034340	response to type I interferon	-8.58385	-5.96544	17858,20684,20846,20847,22040,23960,54123,66141,68713,213002,246728,246730,100038882,14082,15945,16173,16175,17857,18708,20304,21926,22035,24014,56488,58185,66824,81489,246727,270151,11796,12363,15944,15951,17948,17952,54396,55991,69146,116746,229898,23962,231655,12740,15957,71908,667373,58203,15511,22062,170770,17196,12484,20963,225884,66412,80861,16190,12263,12266,12268,15200,17174,70008	Mx2,Sp100,Stat1,Stat2,Trex1,Oas1g,Irf7,Ifitm3,Ifitm1,Ifitm6,Oas2,Oas1a,Isg15,Fadd,Cxcl10,Il18,Il1a,Mx1,Pik3r1,Ccl5,Tnf,Tnfsf10,Rnasel,Nxt1,Rsad2,Pycard,Dnajb1,Oas3,Nlrx1,Birc3,Casp4,Irgm1,Ifi204,Naip2,Naip6,Irgm2,Panx1,Gsdmd,Defb6,Gbp5,Oasl2,Oasl1,Cldn4,Ifit1,Cldn23,Ifit1bl1,Zbp1,Hspa1b,Trp73,Bbc3,Mbp,Cd24a,Syk,Gstp3,Arrdc4,Dhx58,Il4ra,C2,C3,C4b,Hbegf,Masp1,Ace2	63/-
6_Member	GO Biological Processes	GO:0034340	response to type I interferon	-8.58385	-5.96544	17858,20684,20846,20847,22040,23960,54123,66141,68713,213002,246728,246730,100038882	Mx2,Sp100,Stat1,Stat2,Trex1,Oas1g,Irf7,Ifitm3,Ifitm1,Ifitm6,Oas2,Oas1a,Isg15	13/41
6_Member	GO Biological Processes	GO:0060337	type I interferon-mediated signaling pathway	-6.81541	-4.34595	20846,20847,22040,23960,54123,66141,68713,213002,246728,246730	Stat1,Stat2,Trex1,Oas1g,Irf7,Ifitm3,Ifitm1,Ifitm6,Oas2,Oas1a	10/31
6_Member	GO Biological Processes	GO:0071357	cellular response to type I interferon	-6.81541	-4.34595	20846,20847,22040,23960,54123,66141,68713,213002,246728,246730	Stat1,Stat2,Trex1,Oas1g,Irf7,Ifitm3,Ifitm1,Ifitm6,Oas2,Oas1a	10/31
6_Member	KEGG Pathway	mmu05164	Influenza A - Mus musculus (house mouse)	-6.59317	-4.15086	14082,15945,16173,16175,17857,17858,18708,20304,20846,20847,21926,22035,23960,24014,54123,56488,58185,66824,81489,246727,246728,246730,270151	Fadd,Cxcl10,Il18,Il1a,Mx1,Mx2,Pik3r1,Ccl5,Stat1,Stat2,Tnf,Tnfsf10,Oas1g,Rnasel,Irf7,Nxt1,Rsad2,Pycard,Dnajb1,Oas3,Oas2,Oas1a,Nlrx1	23/173
6_Member	KEGG Pathway	mmu04621	NOD-like receptor signaling pathway - Mus musculus (house mouse)	-5.95289	-3.59952	11796,12363,14082,15944,15951,16173,17948,17952,20304,20846,20847,21926,23960,24014,54123,54396,55991,66824,69146,116746,229898,246727,246728,246730,270151	Birc3,Casp4,Fadd,Irgm1,Ifi204,Il18,Naip2,Naip6,Ccl5,Stat1,Stat2,Tnf,Oas1g,Rnasel,Irf7,Irgm2,Panx1,Pycard,Gsdmd,Defb6,Gbp5,Oas3,Oas2,Oas1a,Nlrx1	25/216
6_Member	GO Biological Processes	GO:0140888	interferon-mediated signaling pathway	-5.89472	-3.55194	20846,20847,22040,23960,54123,66141,68713,213002,246728,246730	Stat1,Stat2,Trex1,Oas1g,Irf7,Ifitm3,Ifitm1,Ifitm6,Oas2,Oas1a	10/38
6_Member	GO Biological Processes	GO:0060700	regulation of ribonuclease activity	-4.71954	-2.55806	23960,23962,231655,246727,246728,246730	Oas1g,Oasl2,Oasl1,Oas3,Oas2,Oas1a	6/16
6_Member	KEGG Pathway	mmu05160	Hepatitis C - Mus musculus (house mouse)	-4.60672	-2.46543	12740,14082,15945,15957,17857,17858,18708,20846,20847,21926,23960,24014,54123,58185,71908,246727,246728,246730,667373	Cldn4,Fadd,Cxcl10,Ifit1,Mx1,Mx2,Pik3r1,Stat1,Stat2,Tnf,Oas1g,Rnasel,Irf7,Rsad2,Cldn23,Oas3,Oas2,Oas1a,Ifit1bl1	19/166
6_Member	GO Biological Processes	GO:0060338	regulation of type I interferon-mediated signaling pathway	-4.16515	-2.11584	14082,20847,22040,23960,54123,58203,246727,246730,100038882	Fadd,Stat2,Trex1,Oas1g,Irf7,Zbp1,Oas3,Oas1a,Isg15	9/47
6_Member	GO Biological Processes	GO:0060339	negative regulation of type I interferon-mediated signaling pathway	-3.31026	-1.49401	20847,22040,23960,246727,246730,100038882	Stat2,Trex1,Oas1g,Oas3,Oas1a,Isg15	6/27
6_Member	KEGG Pathway	mmu05162	Measles - Mus musculus (house mouse)	-3.28511	-1.47881	14082,15511,16175,17857,17858,18708,20846,20847,22062,23960,54123,170770,246727,246728,246730	Fadd,Hspa1b,Il1a,Mx1,Mx2,Pik3r1,Stat1,Stat2,Trp73,Oas1g,Irf7,Bbc3,Oas3,Oas2,Oas1a	15/145
6_Member	GO Biological Processes	GO:0032069	regulation of nuclease activity	-3.21987	-1.43802	23960,23962,231655,246727,246728,246730	Oas1g,Oasl2,Oasl1,Oas3,Oas2,Oas1a	6/28
6_Member	GO Biological Processes	GO:2000341	regulation of chemokine (C-X-C motif) ligand 2 production	-3.13353	-1.37953	17196,20304,21926,23960,246727,246730	Mbp,Ccl5,Tnf,Oas1g,Oas3,Oas1a	6/29
6_Member	GO Biological Processes	GO:0071637	regulation of monocyte chemotactic protein-1 production	-2.89595	-1.21729	12484,20963,23960,225884,246727,246730	Cd24a,Syk,Oas1g,Gstp3,Oas3,Oas1a	6/32
6_Member	GO Biological Processes	GO:0032481	positive regulation of type I interferon production	-2.74713	-1.11609	20846,20963,23960,54123,66412,80861,246727,246728,246730,100038882	Stat1,Syk,Oas1g,Irf7,Arrdc4,Dhx58,Oas3,Oas2,Oas1a,Isg15	10/86
6_Member	GO Biological Processes	GO:0032722	positive regulation of chemokine production	-2.74713	-1.11609	16173,16190,17196,20304,20963,21926,23960,66824,246727,246730	Il18,Il4ra,Mbp,Ccl5,Syk,Tnf,Oas1g,Pycard,Oas3,Oas1a	10/86
6_Member	GO Biological Processes	GO:0032648	regulation of interferon-beta production	-2.74358	-1.11609	23960,54123,66412,66824,246727,246728,246730,270151,100038882	Oas1g,Irf7,Arrdc4,Pycard,Oas3,Oas2,Oas1a,Nlrx1,Isg15	9/72
6_Member	GO Biological Processes	GO:0032642	regulation of chemokine production	-2.70842	-1.08704	12484,16173,16190,17196,20304,20963,21926,23960,66824,225884,246727,246730	Cd24a,Il18,Il4ra,Mbp,Ccl5,Syk,Tnf,Oas1g,Pycard,Gstp3,Oas3,Oas1a	12/117
6_Member	GO Biological Processes	GO:0032728	positive regulation of interferon-beta production	-2.42636	-0.857345	23960,54123,66412,246727,246728,246730,100038882	Oas1g,Irf7,Arrdc4,Oas3,Oas2,Oas1a,Isg15	7/52
6_Member	KEGG Pathway	mmu05171	Coronavirus disease - COVID-19 - Mus musculus (house mouse)	-2.40035	-0.83746	12263,12266,12268,15200,15945,17174,17857,17858,18708,20846,20847,20963,21926,23960,70008,246727,246728,246730,100038882	C2,C3,C4b,Hbegf,Cxcl10,Masp1,Mx1,Mx2,Pik3r1,Stat1,Stat2,Syk,Tnf,Oas1g,Ace2,Oas3,Oas2,Oas1a,Isg15	19/249
6_Member	GO Biological Processes	GO:0071659	negative regulation of IP-10 production	-2.12054	-0.639004	23960,246727,246730	Oas1g,Oas3,Oas1a	3/11
6_Member	GO Biological Processes	GO:2000342	negative regulation of chemokine (C-X-C motif) ligand 2 production	-2.12054	-0.639004	23960,246727,246730	Oas1g,Oas3,Oas1a	3/11
6_Member	GO Biological Processes	GO:0071639	positive regulation of monocyte chemotactic protein-1 production	-2.1017	-0.624456	20963,23960,246727,246730	Syk,Oas1g,Oas3,Oas1a	4/21
6_Member	GO Biological Processes	GO:0071658	regulation of IP-10 production	-2.00816	-0.563746	23960,246727,246730	Oas1g,Oas3,Oas1a	3/12
7_Summary	GO Biological Processes	GO:0001818	negative regulation of cytokine production	-8.21929	-5.63868	11829,11846,12484,12560,14254,15234,15944,16145,16365,16952,20128,20390,21926,21946,22287,23960,54396,60533,66222,66824,67664,68038,69550,73732,73914,80861,107221,107515,225884,230738,246727,246730,270151,327959,384997,434215,14205,16175,17196,20963,54448,67313,69677,244202	Aqp4,Arg1,Cd24a,Cdh3,Flt1,Hgf,Irgm1,Igtp,Acod1,Anxa1,Trim30a,Sftpd,Tnf,Pglyrp1,Scgb1a1,Oas1g,Irgm2,Cd274,Serpinb1a,Pycard,Rnf125,Chid1,Bst2,Muc16,Irak3,Dhx58,Ffar4,Lgr4,Gstp3,Zc3h12a,Oas3,Oas1a,Nlrx1,Xaf1,Pglyrp4,Lrrc32,Vegfd,Il1a,Mbp,Syk,Il36a,Inava,Il36b,Nlrp10	44/-
7_Member	GO Biological Processes	GO:0001818	negative regulation of cytokine production	-8.21929	-5.63868	11829,11846,12484,12560,14254,15234,15944,16145,16365,16952,20128,20390,21926,21946,22287,23960,54396,60533,66222,66824,67664,68038,69550,73732,73914,80861,107221,107515,225884,230738,246727,246730,270151,327959,384997,434215	Aqp4,Arg1,Cd24a,Cdh3,Flt1,Hgf,Irgm1,Igtp,Acod1,Anxa1,Trim30a,Sftpd,Tnf,Pglyrp1,Scgb1a1,Oas1g,Irgm2,Cd274,Serpinb1a,Pycard,Rnf125,Chid1,Bst2,Muc16,Irak3,Dhx58,Ffar4,Lgr4,Gstp3,Zc3h12a,Oas3,Oas1a,Nlrx1,Xaf1,Pglyrp4,Lrrc32	36/313
7_Member	GO Biological Processes	GO:0032675	regulation of interleukin-6 production	-3.8563	-1.88224	11829,12484,14205,15234,16175,17196,20128,20963,21926,54448,66824,67313,69677,73732,73914,230738,244202,270151	Aqp4,Cd24a,Vegfd,Hgf,Il1a,Mbp,Trim30a,Syk,Tnf,Il36a,Pycard,Inava,Il36b,Muc16,Irak3,Zc3h12a,Nlrp10,Nlrx1	18/173
7_Member	GO Biological Processes	GO:0032715	negative regulation of interleukin-6 production	-3.67894	-1.7674	11829,12484,15234,20128,21926,73732,73914,230738,270151	Aqp4,Cd24a,Hgf,Trim30a,Tnf,Muc16,Irak3,Zc3h12a,Nlrx1	9/54
8_Summary	GO Biological Processes	GO:0050727	regulation of inflammatory response	-7.97235	-5.40069	11501,11622,12266,12363,12484,13032,14776,14972,15018,15024,15039,15040,15234,15944,16145,16173,16365,16952,19695,20304,21926,21934,21946,22040,22287,54396,56312,58203,63953,66824,67547,69146,74603,75697,100340,107221,110557,210029,230828,232983,244202,270151	Adam8,Ahr,C3,Casp4,Cd24a,Ctsc,Gpx2,H2-K1,H2-Q7,H2-T10,H2-T22,H2-T23,Hgf,Irgm1,Igtp,Il18,Acod1,Anxa1,Reg3g,Ccl5,Tnf,Tnfrsf11a,Pglyrp1,Trex1,Scgb1a1,Irgm2,Nupr1,Zbp1,Dusp10,Pycard,Slc39a8,Gsdmd,Cd200r3,C2cd4b,Smpdl3b,Ffar4,H2-Q6,Metrnl,Il22ra1,Cxcl17,Nlrp10,Nlrx1	42/-
8_Member	GO Biological Processes	GO:0050727	regulation of inflammatory response	-7.97235	-5.40069	11501,11622,12266,12363,12484,13032,14776,14972,15018,15024,15039,15040,15234,15944,16145,16173,16365,16952,19695,20304,21926,21934,21946,22040,22287,54396,56312,58203,63953,66824,67547,69146,74603,75697,100340,107221,110557,210029,230828,232983,244202,270151	Adam8,Ahr,C3,Casp4,Cd24a,Ctsc,Gpx2,H2-K1,H2-Q7,H2-T10,H2-T22,H2-T23,Hgf,Irgm1,Igtp,Il18,Acod1,Anxa1,Reg3g,Ccl5,Tnf,Tnfrsf11a,Pglyrp1,Trex1,Scgb1a1,Irgm2,Nupr1,Zbp1,Dusp10,Pycard,Slc39a8,Gsdmd,Cd200r3,C2cd4b,Smpdl3b,Ffar4,H2-Q6,Metrnl,Il22ra1,Cxcl17,Nlrp10,Nlrx1	42/410
8_Member	GO Biological Processes	GO:0050728	negative regulation of inflammatory response	-3.9207	-1.92602	11622,12484,14776,15234,15944,16145,16365,19695,21946,54396,63953,67547,100340,107221,210029,230828,232983,270151	Ahr,Cd24a,Gpx2,Hgf,Irgm1,Igtp,Acod1,Reg3g,Pglyrp1,Irgm2,Dusp10,Slc39a8,Smpdl3b,Ffar4,Metrnl,Il22ra1,Cxcl17,Nlrx1	18/171
9_Summary	GO Biological Processes	GO:0006954	inflammatory response	-7.59719	-5.0429	11501,12156,12266,12363,12484,12759,12773,12803,13601,13710,13848,15945,16173,16175,16181,16190,16365,16952,17125,17948,17952,18405,18489,19664,19695,20304,20716,20723,20963,21926,22040,22062,22361,23887,27419,54448,55985,56066,56312,66190,66222,66824,69146,69677,75697,100340,107221,229898,230738,244202,12778,12804,14081,16164,16165,17300,18708,20846,20847,21934,23960,23962,54123,66141,68713,7391…	Adam8,Bmp2,C3,Casp4,Cd24a,Clu,Ccr4,Cntf,Ecm1,Elf3,Ephb6,Cxcl10,Il18,Il1a,Il1rn,Il4ra,Acod1,Anxa1,Smad1,Naip2,Naip6,Orm1,Reg3b,Rbpj,Reg3g,Ccl5,Serpina3n,Serpinb9,Syk,Tnf,Trex1,Trp73,Vnn1,Ggt5,Naglu,Il36a,Cxcl13,Cxcl11,Nupr1,Acer3,Serpinb1a,Pycard,Gsdmd,Il36b,C2cd4b,Smpdl3b,Ffar4,Gbp5,Zc3h12a,Nlrp10,Ackr3,Cntfr,Acsl1,Il13ra1,Il13ra2,Foxc1,Pik3r1,Stat1,Stat2,Tnfrsf11a,Oas1g,Oasl2,Irf7,Ifitm3,Ifitm1,…	76/-
9_Member	GO Biological Processes	GO:0006954	inflammatory response	-7.59719	-5.0429	11501,12156,12266,12363,12484,12759,12773,12803,13601,13710,13848,15945,16173,16175,16181,16190,16365,16952,17125,17948,17952,18405,18489,19664,19695,20304,20716,20723,20963,21926,22040,22062,22361,23887,27419,54448,55985,56066,56312,66190,66222,66824,69146,69677,75697,100340,107221,229898,230738,244202	Adam8,Bmp2,C3,Casp4,Cd24a,Clu,Ccr4,Cntf,Ecm1,Elf3,Ephb6,Cxcl10,Il18,Il1a,Il1rn,Il4ra,Acod1,Anxa1,Smad1,Naip2,Naip6,Orm1,Reg3b,Rbpj,Reg3g,Ccl5,Serpina3n,Serpinb9,Syk,Tnf,Trex1,Trp73,Vnn1,Ggt5,Naglu,Il36a,Cxcl13,Cxcl11,Nupr1,Acer3,Serpinb1a,Pycard,Gsdmd,Il36b,C2cd4b,Smpdl3b,Ffar4,Gbp5,Zc3h12a,Nlrp10	50/552
9_Member	GO Biological Processes	GO:0019221	cytokine-mediated signaling pathway	-7.13276	-4.61909	12778,12803,12804,14081,15945,16164,16165,16173,16175,16190,17300,18708,20304,20846,20847,20963,21926,21934,22040,23960,23962,54123,54448,55985,56066,66141,66824,68713,69677,73914,170720,213002,230828,231655,232983,246728,246730	Ackr3,Cntf,Cntfr,Acsl1,Cxcl10,Il13ra1,Il13ra2,Il18,Il1a,Il4ra,Foxc1,Pik3r1,Ccl5,Stat1,Stat2,Syk,Tnf,Tnfrsf11a,Trex1,Oas1g,Oasl2,Irf7,Il36a,Cxcl13,Cxcl11,Ifitm3,Pycard,Ifitm1,Il36b,Irak3,Card14,Ifitm6,Il22ra1,Oasl1,Cxcl17,Oas2,Oas1a	37/360
9_Member	KEGG Pathway	mmu04060	Cytokine-cytokine receptor interaction - Mus musculus (house mouse)	-3.29127	-1.4812	12156,12773,12778,12803,12804,15945,16164,16165,16173,16175,16181,16190,20304,21926,21934,22035,54448,55985,56066,69583,69677,230828,232983,100039863	Bmp2,Ccr4,Ackr3,Cntf,Cntfr,Cxcl10,Il13ra1,Il13ra2,Il18,Il1a,Il1rn,Il4ra,Ccl5,Tnf,Tnfrsf11a,Tnfsf10,Il36a,Cxcl13,Cxcl11,Tnfsf13,Il36b,Il22ra1,Cxcl17,Ccl27al	24/294
10_Summary	GO Biological Processes	GO:0034341	response to type II interferon	-7.08317	-4.57719	11829,14528,15018,15944,16145,16365,20304,20684,20821,20846,21926,24108,66141,68713,69550,74732,76074,213002,229898,236573,626578,11622,13082,15945,16175,16952,19713,20276,20459,20963,22169,22337,27384,54396,54448,55985,56066,60533,66824,68526,69677,73914,75577,105349,108079,170826,215378,230738,269997,622402,12363,12484,21934,27419,63953,67313	Aqp4,Gch1,H2-Q7,Irgm1,Igtp,Acod1,Ccl5,Sp100,Trim21,Stat1,Tnf,Ubd,Ifitm3,Ifitm1,Bst2,Stx11,Gbp8,Ifitm6,Gbp5,Gbp9,Gbp10,Ahr,Cyp26a1,Cxcl10,Il1a,Anxa1,Ret,Scnn1a,Ptk6,Syk,Cmpk2,Vdr,Akr1c13,Irgm2,Il36a,Cxcl13,Cxcl11,Cd274,Pycard,Gpr155,Il36b,Irak3,Dynap,Akr1c18,Prkaa2,Ppargc1b,Brinp3,Zc3h12a,Zfp747,Akr1c12,Casp4,Cd24a,Tnfrsf11a,Naglu,Dusp10,Inava	56/-
10_Member	GO Biological Processes	GO:0034341	response to type II interferon	-7.08317	-4.57719	11829,14528,15018,15944,16145,16365,20304,20684,20821,20846,21926,24108,66141,68713,69550,74732,76074,213002,229898,236573,626578	Aqp4,Gch1,H2-Q7,Irgm1,Igtp,Acod1,Ccl5,Sp100,Trim21,Stat1,Tnf,Ubd,Ifitm3,Ifitm1,Bst2,Stx11,Gbp8,Ifitm6,Gbp5,Gbp9,Gbp10	21/138
10_Member	GO Biological Processes	GO:0071346	cellular response to type II interferon	-3.47543	-1.61152	11829,15018,15944,16145,16365,20304,20846,21926,74732,76074,229898,236573,626578	Aqp4,H2-Q7,Irgm1,Igtp,Acod1,Ccl5,Stat1,Tnf,Stx11,Gbp8,Gbp5,Gbp9,Gbp10	13/110
10_Member	GO Biological Processes	GO:0071396	cellular response to lipid	-2.36993	-0.819035	11622,13082,14528,15944,15945,16145,16175,16365,16952,19713,20276,20459,20846,20963,21926,22169,22337,27384,54396,54448,55985,56066,60533,66824,68526,69677,73914,75577,105349,108079,170826,215378,229898,230738,269997,622402,626578	Ahr,Cyp26a1,Gch1,Irgm1,Cxcl10,Igtp,Il1a,Acod1,Anxa1,Ret,Scnn1a,Ptk6,Stat1,Syk,Tnf,Cmpk2,Vdr,Akr1c13,Irgm2,Il36a,Cxcl13,Cxcl11,Cd274,Pycard,Gpr155,Il36b,Irak3,Dynap,Akr1c18,Prkaa2,Ppargc1b,Brinp3,Gbp5,Zc3h12a,Zfp747,Akr1c12,Gbp10	37/604
10_Member	GO Biological Processes	GO:0002237	response to molecule of bacterial origin	-2.36631	-0.816261	11622,12363,12484,14528,15944,15945,16145,16175,16365,20846,21926,21934,22169,27419,54396,54448,55985,56066,60533,63953,66824,67313,69677,73914,229898,230738,626578	Ahr,Casp4,Cd24a,Gch1,Irgm1,Cxcl10,Igtp,Il1a,Acod1,Stat1,Tnf,Tnfrsf11a,Cmpk2,Naglu,Irgm2,Il36a,Cxcl13,Cxcl11,Cd274,Dusp10,Pycard,Inava,Il36b,Irak3,Gbp5,Zc3h12a,Gbp10	27/403
10_Member	GO Biological Processes	GO:0071219	cellular response to molecule of bacterial origin	-2.14979	-0.652859	11622,14528,15944,15945,16145,16175,16365,20846,21926,22169,54396,54448,55985,56066,60533,66824,69677,73914,229898,230738,626578	Ahr,Gch1,Irgm1,Cxcl10,Igtp,Il1a,Acod1,Stat1,Tnf,Cmpk2,Irgm2,Il36a,Cxcl13,Cxcl11,Cd274,Pycard,Il36b,Irak3,Gbp5,Zc3h12a,Gbp10	21/301
10_Member	GO Biological Processes	GO:0071216	cellular response to biotic stimulus	-2.03459	-0.574139	11622,14528,15944,15945,16145,16175,16365,20846,20963,21926,22169,54396,54448,55985,56066,60533,66824,69677,73914,229898,230738,626578	Ahr,Gch1,Irgm1,Cxcl10,Igtp,Il1a,Acod1,Stat1,Syk,Tnf,Cmpk2,Irgm2,Il36a,Cxcl13,Cxcl11,Cd274,Pycard,Il36b,Irak3,Gbp5,Zc3h12a,Gbp10	22/328
10_Member	GO Biological Processes	GO:0071222	cellular response to lipopolysaccharide	-2.00551	-0.562069	14528,15944,15945,16145,16175,16365,20846,21926,22169,54396,54448,55985,56066,60533,66824,69677,73914,229898,230738,626578	Gch1,Irgm1,Cxcl10,Igtp,Il1a,Acod1,Stat1,Tnf,Cmpk2,Irgm2,Il36a,Cxcl13,Cxcl11,Cd274,Pycard,Il36b,Irak3,Gbp5,Zc3h12a,Gbp10	20/291
11_Summary	GO Biological Processes	GO:0008285	negative regulation of cell population proliferation	-6.9499	-4.46619	11622,11727,11846,12156,12394,12484,12778,13642,14254,14972,15018,15024,15039,15040,15944,15959,16175,16682,16854,17125,18295,18708,19273,19664,20259,20379,20390,20556,20732,20846,20869,21784,21926,21983,22062,22287,22337,22436,26971,50794,55948,56312,56429,58208,58801,60533,63953,66141,68713,70008,73732,100342,110557,207259,218772,218820,223650,240725,434215,667370,671535	Ahr,Ang,Arg1,Bmp2,Runx1,Cd24a,Ackr3,Efnb2,Flt1,H2-K1,H2-Q7,H2-T10,H2-T22,H2-T23,Irgm1,Ifit3,Il1a,Krt4,Lgals3,Smad1,Ogn,Pik3r1,Ptpru,Rbpj,Scin,Sfrp4,Sftpd,Slfn2,Spint1,Stat1,Stk11,Tff1,Tnf,Tpbg,Trp73,Scgb1a1,Vdr,Xdh,Pla2g2f,Klf13,Sfn,Nupr1,Dpt,Bcl11b,Pmaip1,Cd274,Dusp10,Ifitm3,Ifitm1,Ace2,Muc16,Tent5b,H2-Q6,Zbtb7c,Rarb,Zfp503,Eppk1,Sulf1,Lrrc32,Ifit3b,Parp10	61/-
11_Member	GO Biological Processes	GO:0008285	negative regulation of cell population proliferation	-6.9499	-4.46619	11622,11727,11846,12156,12394,12484,12778,13642,14254,14972,15018,15024,15039,15040,15944,15959,16175,16682,16854,17125,18295,18708,19273,19664,20259,20379,20390,20556,20732,20846,20869,21784,21926,21983,22062,22287,22337,22436,26971,50794,55948,56312,56429,58208,58801,60533,63953,66141,68713,70008,73732,100342,110557,207259,218772,218820,223650,240725,434215,667370,671535	Ahr,Ang,Arg1,Bmp2,Runx1,Cd24a,Ackr3,Efnb2,Flt1,H2-K1,H2-Q7,H2-T10,H2-T22,H2-T23,Irgm1,Ifit3,Il1a,Krt4,Lgals3,Smad1,Ogn,Pik3r1,Ptpru,Rbpj,Scin,Sfrp4,Sftpd,Slfn2,Spint1,Stat1,Stk11,Tff1,Tnf,Tpbg,Trp73,Scgb1a1,Vdr,Xdh,Pla2g2f,Klf13,Sfn,Nupr1,Dpt,Bcl11b,Pmaip1,Cd274,Dusp10,Ifitm3,Ifitm1,Ace2,Muc16,Tent5b,H2-Q6,Zbtb7c,Rarb,Zfp503,Eppk1,Sulf1,Lrrc32,Ifit3b,Parp10	61/772
12_Summary	GO Biological Processes	GO:2001056	positive regulation of cysteine-type endopeptidase activity	-6.75965	-4.29714	12905,13033,14082,15950,15951,19713,20846,20963,21926,22035,22436,58801,66824,76884,170770,226695,236312,381308,100033459,100040462,100504287,17196,15511,17002,17948,17952,55948,12740,11501,12759,12795,13032,21922,56312,68545,244058,11727,12156,14254,18003,20304,20354,22417,55985,56212,65079,72112,170826,22062,22361,66813,76072,18708	Cradd,Ctsd,Fadd,Ifi203,Ifi204,Ret,Stat1,Syk,Tnf,Tnfsf10,Xdh,Pmaip1,Pycard,Cyfip2,Bbc3,Ifi205,Ifi209,Ifi211,Ifi208,Mndal,Ifi203-ps,Mbp,Hspa1b,Ltf,Naip2,Naip6,Sfn,Cldn4,Adam8,Clu,Plk3,Ctsc,Clec3b,Nupr1,Ecscr,Rgma,Ang,Bmp2,Flt1,Nedd9,Ccl5,Sema4d,Wnt4,Cxcl13,Rhog,Rtn4r,Ppp1r14d,Ppargc1b,Trp73,Vnn1,Bcl2l14,Rnf183,Pik3r1	53/-
12_Member	GO Biological Processes	GO:2001056	positive regulation of cysteine-type endopeptidase activity	-6.75965	-4.29714	12905,13033,14082,15950,15951,19713,20846,20963,21926,22035,22436,58801,66824,76884,170770,226695,236312,381308,100033459,100040462,100504287	Cradd,Ctsd,Fadd,Ifi203,Ifi204,Ret,Stat1,Syk,Tnf,Tnfsf10,Xdh,Pmaip1,Pycard,Cyfip2,Bbc3,Ifi205,Ifi209,Ifi211,Ifi208,Mndal,Ifi203-ps	21/144
12_Member	GO Biological Processes	GO:0010950	positive regulation of endopeptidase activity	-6.4027	-3.9921	12905,13033,14082,15950,15951,17196,19713,20846,20963,21926,22035,22436,58801,66824,76884,170770,226695,236312,381308,100033459,100040462,100504287	Cradd,Ctsd,Fadd,Ifi203,Ifi204,Mbp,Ret,Stat1,Syk,Tnf,Tnfsf10,Xdh,Pmaip1,Pycard,Cyfip2,Bbc3,Ifi205,Ifi209,Ifi211,Ifi208,Mndal,Ifi203-ps	22/164
12_Member	GO Biological Processes	GO:2000116	regulation of cysteine-type endopeptidase activity	-6.34159	-3.94306	12905,13033,14082,15511,15950,15951,17002,17948,17952,19713,20846,20963,21926,22035,22436,55948,58801,66824,76884,170770,226695,236312,381308,100033459,100040462,100504287	Cradd,Ctsd,Fadd,Hspa1b,Ifi203,Ifi204,Ltf,Naip2,Naip6,Ret,Stat1,Syk,Tnf,Tnfsf10,Xdh,Sfn,Pmaip1,Pycard,Cyfip2,Bbc3,Ifi205,Ifi209,Ifi211,Ifi208,Mndal,Ifi203-ps	26/220
12_Member	GO Biological Processes	GO:0010952	positive regulation of peptidase activity	-5.94554	-3.5975	12740,12905,13033,14082,15950,15951,17196,19713,20846,20963,21926,22035,22436,58801,66824,76884,170770,226695,236312,381308,100033459,100040462,100504287	Cldn4,Cradd,Ctsd,Fadd,Ifi203,Ifi204,Mbp,Ret,Stat1,Syk,Tnf,Tnfsf10,Xdh,Pmaip1,Pycard,Cyfip2,Bbc3,Ifi205,Ifi209,Ifi211,Ifi208,Mndal,Ifi203-ps	23/188
12_Member	GO Biological Processes	GO:0045862	positive regulation of proteolysis	-4.962	-2.74176	11501,12740,12759,12795,12905,13032,13033,14082,15511,15950,15951,17196,19713,20846,20963,21922,21926,22035,22436,56312,58801,66824,68545,76884,170770,226695,236312,244058,381308,100033459,100040462,100504287	Adam8,Cldn4,Clu,Plk3,Cradd,Ctsc,Ctsd,Fadd,Hspa1b,Ifi203,Ifi204,Mbp,Ret,Stat1,Syk,Clec3b,Tnf,Tnfsf10,Xdh,Nupr1,Pmaip1,Pycard,Ecscr,Cyfip2,Bbc3,Ifi205,Ifi209,Rgma,Ifi211,Ifi208,Mndal,Ifi203-ps	32/358
12_Member	GO Biological Processes	GO:0051345	positive regulation of hydrolase activity	-3.72243	-1.80496	11727,12156,12740,12905,13033,14082,14254,15950,15951,17196,18003,19713,20304,20354,20846,20963,21926,22035,22417,22436,55985,56212,58801,65079,66824,72112,76884,170770,170826,226695,236312,244058,381308,100033459,100040462,100504287	Ang,Bmp2,Cldn4,Cradd,Ctsd,Fadd,Flt1,Ifi203,Ifi204,Mbp,Nedd9,Ret,Ccl5,Sema4d,Stat1,Syk,Tnf,Tnfsf10,Wnt4,Xdh,Cxcl13,Rhog,Pmaip1,Rtn4r,Pycard,Ppp1r14d,Cyfip2,Bbc3,Ppargc1b,Ifi205,Ifi209,Rgma,Ifi211,Ifi208,Mndal,Ifi203-ps	36/489
12_Member	GO Biological Processes	GO:0042771	intrinsic apoptotic signaling pathway in response to DNA damage by p53 class mediator	-2.82308	-1.16328	15951,22062,56312,58801,66824,170770	Ifi204,Trp73,Nupr1,Pmaip1,Pycard,Bbc3	6/33
12_Member	GO Biological Processes	GO:2001235	positive regulation of apoptotic signaling pathway	-2.41883	-0.851578	12759,12905,13032,14082,19713,21926,22035,22062,22361,56312,58801,66813,66824,76072,170770	Clu,Cradd,Ctsc,Fadd,Ret,Tnf,Tnfsf10,Trp73,Vnn1,Nupr1,Pmaip1,Bcl2l14,Pycard,Rnf183,Bbc3	15/177
12_Member	GO Biological Processes	GO:0008630	intrinsic apoptotic signaling pathway in response to DNA damage	-2.31997	-0.782393	15951,18708,21926,22062,55948,56312,58801,66824,170770	Ifi204,Pik3r1,Tnf,Trp73,Sfn,Nupr1,Pmaip1,Pycard,Bbc3	9/83
12_Member	GO Biological Processes	GO:0043281	regulation of cysteine-type endopeptidase activity involved in apoptotic process	-2.19961	-0.689805	12905,13033,15511,17948,17952,19713,20846,20963,21926,22035,22436,55948,58801,66824,170770	Cradd,Ctsd,Hspa1b,Naip2,Naip6,Ret,Stat1,Syk,Tnf,Tnfsf10,Xdh,Sfn,Pmaip1,Pycard,Bbc3	15/187
12_Member	GO Biological Processes	GO:0043280	positive regulation of cysteine-type endopeptidase activity involved in apoptotic process	-2.18413	-0.679473	12905,13033,19713,20846,20963,21926,22035,22436,58801,66824,170770	Cradd,Ctsd,Ret,Stat1,Syk,Tnf,Tnfsf10,Xdh,Pmaip1,Pycard,Bbc3	11/119
12_Member	GO Biological Processes	GO:2001238	positive regulation of extrinsic apoptotic signaling pathway	-2.04271	-0.579137	14082,19713,21926,22035,58801,66813,66824	Fadd,Ret,Tnf,Tnfsf10,Pmaip1,Bcl2l14,Pycard	7/61
12_Member	GO Biological Processes	GO:0006919	activation of cysteine-type endopeptidase activity involved in apoptotic process	-2.04165	-0.579137	12905,19713,20846,21926,22436,58801,66824,170770	Cradd,Ret,Stat1,Tnf,Xdh,Pmaip1,Pycard,Bbc3	8/76
13_Summary	GO Biological Processes	GO:0022407	regulation of cell-cell adhesion	-6.66321	-4.21427	11501,11684,11846,12156,12394,12484,12507,13642,13848,14082,14538,14972,15018,15024,15039,15040,15944,16173,16175,16181,16190,16854,16952,17196,17356,18708,19273,20304,20390,20963,21926,22287,22361,22417,26971,55985,60533,63953,66824,69677,74591,78317,110557,230738,269152,434215,12759,17002,20128,22040,23960,73914,225884,246727,246728,246730,20709,20723,21354,93694,14366,14369,17926,20354,56753,1…	Adam8,Alox12,Arg1,Bmp2,Runx1,Cd24a,Cd5,Efnb2,Ephb6,Fadd,Gcnt2,H2-K1,H2-Q7,H2-T10,H2-T22,H2-T23,Irgm1,Il18,Il1a,Il1rn,Il4ra,Lgals3,Anxa1,Mbp,Afdn,Pik3r1,Ptpru,Ccl5,Sftpd,Syk,Tnf,Scgb1a1,Vnn1,Wnt4,Pla2g2f,Cxcl13,Cd274,Dusp10,Pycard,Il36b,Abca12,Ccdc88b,H2-Q6,Zc3h12a,Kif26b,Lrrc32,Clu,Ltf,Trim30a,Trex1,Oas1g,Irak3,Gstp3,Oas3,Oas2,Oas1a,Serpinb9f,Serpinb9,Tap1,Clec2d,Fzd4,Fzd7,Myoc,Sema4d,Tacstd2,Plx…	154/-
13_Member	GO Biological Processes	GO:0022407	regulation of cell-cell adhesion	-6.66321	-4.21427	11501,11684,11846,12156,12394,12484,12507,13642,13848,14082,14538,14972,15018,15024,15039,15040,15944,16173,16175,16181,16190,16854,16952,17196,17356,18708,19273,20304,20390,20963,21926,22287,22361,22417,26971,55985,60533,63953,66824,69677,74591,78317,110557,230738,269152,434215	Adam8,Alox12,Arg1,Bmp2,Runx1,Cd24a,Cd5,Efnb2,Ephb6,Fadd,Gcnt2,H2-K1,H2-Q7,H2-T10,H2-T22,H2-T23,Irgm1,Il18,Il1a,Il1rn,Il4ra,Lgals3,Anxa1,Mbp,Afdn,Pik3r1,Ptpru,Ccl5,Sftpd,Syk,Tnf,Scgb1a1,Vnn1,Wnt4,Pla2g2f,Cxcl13,Cd274,Dusp10,Pycard,Il36b,Abca12,Ccdc88b,H2-Q6,Zc3h12a,Kif26b,Lrrc32	46/523
13_Member	GO Biological Processes	GO:1903555	regulation of tumor necrosis factor superfamily cytokine production	-6.38028	-3.97576	11501,12484,12759,14082,14972,15018,15024,15039,15040,16173,16175,17002,18708,20128,20963,22040,23960,60533,66824,73914,110557,225884,230738,246727,246728,246730	Adam8,Cd24a,Clu,Fadd,H2-K1,H2-Q7,H2-T10,H2-T22,H2-T23,Il18,Il1a,Ltf,Pik3r1,Trim30a,Syk,Trex1,Oas1g,Cd274,Pycard,Irak3,H2-Q6,Gstp3,Zc3h12a,Oas3,Oas2,Oas1a	26/219
13_Member	GO Biological Processes	GO:0042270	protection from natural killer cell mediated cytotoxicity	-6.25968	-3.88431	14972,15018,15024,15039,15040,20709,20723,21354,93694,110557	H2-K1,H2-Q7,H2-T10,H2-T22,H2-T23,Serpinb9f,Serpinb9,Tap1,Clec2d,H2-Q6	10/35
13_Member	GO Biological Processes	GO:0007162	negative regulation of cell adhesion	-5.81227	-3.47983	11501,11684,11846,12156,12394,12484,14366,14369,14538,14972,15018,15024,15039,15040,16181,16190,16854,16952,17196,17926,18708,20354,20390,22287,26971,56753,60533,74591,110557,140570,230738,240025,434215	Adam8,Alox12,Arg1,Bmp2,Runx1,Cd24a,Fzd4,Fzd7,Gcnt2,H2-K1,H2-Q7,H2-T10,H2-T22,H2-T23,Il1rn,Il4ra,Lgals3,Anxa1,Mbp,Myoc,Pik3r1,Sema4d,Sftpd,Scgb1a1,Pla2g2f,Tacstd2,Cd274,Abca12,H2-Q6,Plxnb2,Zc3h12a,Dact2,Lrrc32	33/342
13_Member	GO Biological Processes	GO:0002675	positive regulation of acute inflammatory response	-5.7381	-3.41074	11501,12266,14972,15018,15024,15039,15040,20304,21926,21934,75697,110557	Adam8,C3,H2-K1,H2-Q7,H2-T10,H2-T22,H2-T23,Ccl5,Tnf,Tnfrsf11a,C2cd4b,H2-Q6	12/58
13_Member	GO Biological Processes	GO:0050729	positive regulation of inflammatory response	-5.67685	-3.35451	11501,12266,12363,12484,13032,14972,15018,15024,15039,15040,16173,20304,21926,21934,56312,58203,66824,69146,75697,110557,244202	Adam8,C3,Casp4,Cd24a,Ctsc,H2-K1,H2-Q7,H2-T10,H2-T22,H2-T23,Il18,Ccl5,Tnf,Tnfrsf11a,Nupr1,Zbp1,Pycard,Gsdmd,C2cd4b,H2-Q6,Nlrp10	21/167
13_Member	GO Biological Processes	GO:0032680	regulation of tumor necrosis factor production	-5.42702	-3.11455	12484,12759,14082,14972,15018,15024,15039,15040,16173,16175,17002,18708,20128,20963,22040,23960,66824,73914,110557,225884,230738,246727,246728,246730	Cd24a,Clu,Fadd,H2-K1,H2-Q7,H2-T10,H2-T22,H2-T23,Il18,Il1a,Ltf,Pik3r1,Trim30a,Syk,Trex1,Oas1g,Pycard,Irak3,H2-Q6,Gstp3,Zc3h12a,Oas3,Oas2,Oas1a	24/216
13_Member	GO Biological Processes	GO:0002700	regulation of production of molecular mediator of immune response	-5.31998	-3.0266	11846,12363,14972,15018,15024,15039,15040,16165,16173,16190,16447,19041,20963,21926,22040,23993,55991,58185,66824,67313,69550,69583,73914,110557,270151	Arg1,Casp4,H2-K1,H2-Q7,H2-T10,H2-T22,H2-T23,Il13ra2,Il18,Il4ra,Ivl,Ppl,Syk,Tnf,Trex1,Klk7,Panx1,Rsad2,Pycard,Inava,Bst2,Tnfsf13,Irak3,H2-Q6,Nlrx1	25/234
13_Member	GO Biological Processes	GO:0002456	T cell mediated immunity	-5.26456	-2.98043	11891,13032,13848,14972,15018,15040,16173,20556,20723,22040,74732,110557	Rab27a,Ctsc,Ephb6,H2-K1,H2-Q7,H2-T23,Il18,Slfn2,Serpinb9,Trex1,Stx11,H2-Q6	12/64
13_Member	GO Biological Processes	GO:0042129	regulation of T cell proliferation	-5.25435	-2.9792	11846,12484,14082,14972,15018,15024,15039,15040,15944,16173,16175,16854,16952,20304,20390,20963,22287,26971,60533,66824,78317,109594,110557,434215	Arg1,Cd24a,Fadd,H2-K1,H2-Q7,H2-T10,H2-T22,H2-T23,Irgm1,Il18,Il1a,Lgals3,Anxa1,Ccl5,Sftpd,Syk,Scgb1a1,Pla2g2f,Cd274,Pycard,Ccdc88b,Lmo1,H2-Q6,Lrrc32	24/221
13_Member	GO Biological Processes	GO:0022408	negative regulation of cell-cell adhesion	-5.25428	-2.9792	11501,11684,11846,12156,12394,12484,14972,15018,15024,15039,15040,16181,16190,16854,16952,17196,18708,20390,22287,26971,60533,74591,110557,230738,434215	Adam8,Alox12,Arg1,Bmp2,Runx1,Cd24a,H2-K1,H2-Q7,H2-T10,H2-T22,H2-T23,Il1rn,Il4ra,Lgals3,Anxa1,Mbp,Pik3r1,Sftpd,Scgb1a1,Pla2g2f,Cd274,Abca12,H2-Q6,Zc3h12a,Lrrc32	25/236
13_Member	GO Biological Processes	GO:0022409	positive regulation of cell-cell adhesion	-5.24042	-2.9742	11501,12394,12484,12507,13642,13848,14082,14538,14972,15018,15024,15039,15040,15944,16173,16175,16190,16952,17356,19273,20304,20963,21926,22361,55985,60533,63953,66824,69677,78317,110557,269152	Adam8,Runx1,Cd24a,Cd5,Efnb2,Ephb6,Fadd,Gcnt2,H2-K1,H2-Q7,H2-T10,H2-T22,H2-T23,Irgm1,Il18,Il1a,Il4ra,Anxa1,Afdn,Ptpru,Ccl5,Syk,Tnf,Vnn1,Cxcl13,Cd274,Dusp10,Pycard,Il36b,Ccdc88b,H2-Q6,Kif26b	32/347
13_Member	GO Biological Processes	GO:0001913	T cell mediated cytotoxicity	-5.11578	-2.85824	11891,13032,14972,15018,15040,20723,74732,110557	Rab27a,Ctsc,H2-K1,H2-Q7,H2-T23,Serpinb9,Stx11,H2-Q6	8/28
13_Member	GO Biological Processes	GO:0002704	negative regulation of leukocyte mediated immunity	-5.1062	-2.85294	11622,11846,14972,15018,15024,15039,15040,16165,20709,20723,21354,69550,93694,96935,110557	Ahr,Arg1,H2-K1,H2-Q7,H2-T10,H2-T22,H2-T23,Il13ra2,Serpinb9f,Serpinb9,Tap1,Bst2,Clec2d,Susd4,H2-Q6	15/101
13_Member	GO Biological Processes	GO:0050863	regulation of T cell activation	-5.02469	-2.77987	11501,11846,12394,12484,12507,13642,13848,14082,14972,15018,15024,15039,15040,15944,16173,16175,16190,16854,16952,20304,20390,20963,22040,22287,22361,26971,60533,63953,66824,69677,78317,109594,110557,230738,434215	Adam8,Arg1,Runx1,Cd24a,Cd5,Efnb2,Ephb6,Fadd,H2-K1,H2-Q7,H2-T10,H2-T22,H2-T23,Irgm1,Il18,Il1a,Il4ra,Lgals3,Anxa1,Ccl5,Sftpd,Syk,Trex1,Scgb1a1,Vnn1,Pla2g2f,Cd274,Dusp10,Pycard,Il36b,Ccdc88b,Lmo1,H2-Q6,Zc3h12a,Lrrc32	35/406
13_Member	GO Biological Processes	GO:0051249	regulation of lymphocyte activation	-4.99086	-2.75431	11501,11622,11846,12394,12484,12507,13642,13848,14082,14256,14972,15018,15024,15039,15040,15944,16173,16175,16190,16854,16952,18003,20304,20390,20963,21336,21946,22040,22287,22361,26971,60533,63953,66824,69583,69677,78317,109594,110557,230738,232946,384997,434215	Adam8,Ahr,Arg1,Runx1,Cd24a,Cd5,Efnb2,Ephb6,Fadd,Flt3l,H2-K1,H2-Q7,H2-T10,H2-T22,H2-T23,Irgm1,Il18,Il1a,Il4ra,Lgals3,Anxa1,Nedd9,Ccl5,Sftpd,Syk,Tacr1,Pglyrp1,Trex1,Scgb1a1,Vnn1,Pla2g2f,Cd274,Dusp10,Pycard,Tnfsf13,Il36b,Ccdc88b,Lmo1,H2-Q6,Zc3h12a,Bloc1s3,Pglyrp4,Lrrc32	43/548
13_Member	KEGG Pathway	mmu05169	Epstein-Barr virus infection - Mus musculus (house mouse)	-4.95829	-2.74176	14082,14972,15018,15024,15039,15040,15945,17060,18708,19664,19668,20846,20847,20963,21354,21926,23960,54123,110557,215446,246727,246728,246730,100038882	Fadd,H2-K1,H2-Q7,H2-T10,H2-T22,H2-T23,Cxcl10,Blnk,Pik3r1,Rbpj,Rbpjl,Stat1,Stat2,Syk,Tap1,Tnf,Oas1g,Irf7,H2-Q6,Entpd3,Oas3,Oas2,Oas1a,Isg15	24/230
13_Member	GO Biological Processes	GO:0002694	regulation of leukocyte activation	-4.93276	-2.72012	11501,11622,11846,12394,12484,12507,13032,13642,13848,14082,14256,14972,15018,15024,15039,15040,15944,16173,16175,16190,16854,16952,18003,19294,20304,20390,20963,21336,21926,21946,22040,22287,22361,26971,60533,63953,66824,69583,69677,78317,109594,110557,171284,230738,232946,384997,434215	Adam8,Ahr,Arg1,Runx1,Cd24a,Cd5,Ctsc,Efnb2,Ephb6,Fadd,Flt3l,H2-K1,H2-Q7,H2-T10,H2-T22,H2-T23,Irgm1,Il18,Il1a,Il4ra,Lgals3,Anxa1,Nedd9,Nectin2,Ccl5,Sftpd,Syk,Tacr1,Tnf,Pglyrp1,Trex1,Scgb1a1,Vnn1,Pla2g2f,Cd274,Dusp10,Pycard,Tnfsf13,Il36b,Ccdc88b,Lmo1,H2-Q6,Timd2,Zc3h12a,Bloc1s3,Pglyrp4,Lrrc32	47/624
13_Member	GO Biological Processes	GO:1903557	positive regulation of tumor necrosis factor superfamily cytokine production	-4.91927	-2.71049	11501,12759,14082,14972,15018,15024,15039,15040,16173,16175,18708,20963,23960,66824,110557,246727,246728,246730	Adam8,Clu,Fadd,H2-K1,H2-Q7,H2-T10,H2-T22,H2-T23,Il18,Il1a,Pik3r1,Syk,Oas1g,Pycard,H2-Q6,Oas3,Oas2,Oas1a	18/144
13_Member	GO Biological Processes	GO:0002696	positive regulation of leukocyte activation	-4.88482	-2.69115	11501,12394,12484,12507,13032,13642,13848,14082,14256,14972,15018,15024,15039,15040,15944,16173,16175,16190,16952,19294,20304,20963,21336,21926,22361,60533,63953,66824,69583,69677,78317,110557,171284,232946	Adam8,Runx1,Cd24a,Cd5,Ctsc,Efnb2,Ephb6,Fadd,Flt3l,H2-K1,H2-Q7,H2-T10,H2-T22,H2-T23,Irgm1,Il18,Il1a,Il4ra,Anxa1,Nectin2,Ccl5,Syk,Tacr1,Tnf,Vnn1,Cd274,Dusp10,Pycard,Tnfsf13,Il36b,Ccdc88b,H2-Q6,Timd2,Bloc1s3	34/395
13_Member	GO Biological Processes	GO:0050670	regulation of lymphocyte proliferation	-4.86419	-2.67421	11622,11846,12484,14082,14256,14972,15018,15024,15039,15040,15944,16173,16175,16854,16952,20304,20390,20963,21336,22287,26971,60533,66824,78317,109594,110557,434215	Ahr,Arg1,Cd24a,Fadd,Flt3l,H2-K1,H2-Q7,H2-T10,H2-T22,H2-T23,Irgm1,Il18,Il1a,Lgals3,Anxa1,Ccl5,Sftpd,Syk,Tacr1,Scgb1a1,Pla2g2f,Cd274,Pycard,Ccdc88b,Lmo1,H2-Q6,Lrrc32	27/280
13_Member	GO Biological Processes	GO:0045953	negative regulation of natural killer cell mediated cytotoxicity	-4.82225	-2.63594	14972,15018,15024,15039,15040,20709,20723,21354,93694,110557	H2-K1,H2-Q7,H2-T10,H2-T22,H2-T23,Serpinb9f,Serpinb9,Tap1,Clec2d,H2-Q6	10/49
13_Member	GO Biological Processes	GO:0042102	positive regulation of T cell proliferation	-4.80856	-2.62588	12484,14082,14972,15018,15024,15039,15040,15944,16173,16175,16952,20304,20963,60533,66824,78317,110557	Cd24a,Fadd,H2-K1,H2-Q7,H2-T10,H2-T22,H2-T23,Irgm1,Il18,Il1a,Anxa1,Ccl5,Syk,Cd274,Pycard,Ccdc88b,H2-Q6	17/133
13_Member	GO Biological Processes	GO:0002819	regulation of adaptive immune response	-4.75859	-2.58664	11622,11846,12266,12484,14082,14972,15018,15024,15039,15040,16173,16190,16952,19294,21926,54123,58185,60533,63953,66824,69583,96935,110557,230738,244202	Ahr,Arg1,C3,Cd24a,Fadd,H2-K1,H2-Q7,H2-T10,H2-T22,H2-T23,Il18,Il4ra,Anxa1,Nectin2,Tnf,Irf7,Rsad2,Cd274,Dusp10,Pycard,Tnfsf13,Susd4,H2-Q6,Zc3h12a,Nlrp10	25/252
13_Member	GO Biological Processes	GO:0032944	regulation of mononuclear cell proliferation	-4.75329	-2.58486	11622,11846,12484,14082,14256,14972,15018,15024,15039,15040,15944,16173,16175,16854,16952,20304,20390,20963,21336,22287,26971,60533,66824,78317,109594,110557,434215	Ahr,Arg1,Cd24a,Fadd,Flt3l,H2-K1,H2-Q7,H2-T10,H2-T22,H2-T23,Irgm1,Il18,Il1a,Lgals3,Anxa1,Ccl5,Sftpd,Syk,Tacr1,Scgb1a1,Pla2g2f,Cd274,Pycard,Ccdc88b,Lmo1,H2-Q6,Lrrc32	27/284
13_Member	GO Biological Processes	GO:0002716	negative regulation of natural killer cell mediated immunity	-4.74055	-2.5756	14972,15018,15024,15039,15040,20709,20723,21354,93694,110557	H2-K1,H2-Q7,H2-T10,H2-T22,H2-T23,Serpinb9f,Serpinb9,Tap1,Clec2d,H2-Q6	10/50
13_Member	GO Biological Processes	GO:1903037	regulation of leukocyte cell-cell adhesion	-4.70354	-2.54548	11501,11846,12394,12484,12507,13642,13848,14082,14972,15018,15024,15039,15040,15944,16173,16175,16190,16854,16952,20304,20390,20963,21926,22287,22361,26971,60533,63953,66824,69677,78317,110557,230738,434215	Adam8,Arg1,Runx1,Cd24a,Cd5,Efnb2,Ephb6,Fadd,H2-K1,H2-Q7,H2-T10,H2-T22,H2-T23,Irgm1,Il18,Il1a,Il4ra,Lgals3,Anxa1,Ccl5,Sftpd,Syk,Tnf,Scgb1a1,Vnn1,Pla2g2f,Cd274,Dusp10,Pycard,Il36b,Ccdc88b,H2-Q6,Zc3h12a,Lrrc32	34/403
13_Member	GO Biological Processes	GO:0050870	positive regulation of T cell activation	-4.69674	-2.54209	11501,12394,12484,12507,13642,13848,14082,14972,15018,15024,15039,15040,15944,16173,16175,16190,16952,20304,20963,22361,60533,63953,66824,69677,78317,110557	Adam8,Runx1,Cd24a,Cd5,Efnb2,Ephb6,Fadd,H2-K1,H2-Q7,H2-T10,H2-T22,H2-T23,Irgm1,Il18,Il1a,Il4ra,Anxa1,Ccl5,Syk,Vnn1,Cd274,Dusp10,Pycard,Il36b,Ccdc88b,H2-Q6	26/270
13_Member	GO Biological Processes	GO:0046641	positive regulation of alpha-beta T cell proliferation	-4.66097	-2.50971	12484,14972,15018,15024,15039,15040,15944,16173,20963,110557	Cd24a,H2-K1,H2-Q7,H2-T10,H2-T22,H2-T23,Irgm1,Il18,Syk,H2-Q6	10/51
13_Member	GO Biological Processes	GO:0002718	regulation of cytokine production involved in immune response	-4.55724	-2.42249	11846,12363,14972,15018,15024,15039,15040,16173,20963,21926,55991,58185,66824,67313,69550,73914,110557,270151	Arg1,Casp4,H2-K1,H2-Q7,H2-T10,H2-T22,H2-T23,Il18,Syk,Tnf,Panx1,Rsad2,Pycard,Inava,Bst2,Irak3,H2-Q6,Nlrx1	18/153
13_Member	GO Biological Processes	GO:0045785	positive regulation of cell adhesion	-4.54893	-2.41741	11501,12394,12484,12507,13642,13848,14082,14343,14538,14972,15018,15024,15039,15040,15944,16173,16175,16190,16952,17356,17926,18003,19273,19713,20304,20963,21926,22361,22417,55985,60533,63953,64074,64075,66824,69677,74199,78317,110557,269152,380705	Adam8,Runx1,Cd24a,Cd5,Efnb2,Ephb6,Fadd,Fut1,Gcnt2,H2-K1,H2-Q7,H2-T10,H2-T22,H2-T23,Irgm1,Il18,Il1a,Il4ra,Anxa1,Afdn,Myoc,Nedd9,Ptpru,Ret,Ccl5,Syk,Tnf,Vnn1,Wnt4,Cxcl13,Cd274,Dusp10,Smoc2,Smoc1,Pycard,Il36b,Vit,Ccdc88b,H2-Q6,Kif26b,Tmem102	41/535
13_Member	GO Biological Processes	GO:0032819	positive regulation of natural killer cell proliferation	-4.54042	-2.4121	14256,14972,15018,15024,15039,15040,16173,110557	Flt3l,H2-K1,H2-Q7,H2-T10,H2-T22,H2-T23,Il18,H2-Q6	8/33
13_Member	GO Biological Processes	GO:0002707	negative regulation of lymphocyte mediated immunity	-4.4804	-2.36467	11622,11846,14972,15018,15024,15039,15040,20709,20723,21354,93694,96935,110557	Ahr,Arg1,H2-K1,H2-Q7,H2-T10,H2-T22,H2-T23,Serpinb9f,Serpinb9,Tap1,Clec2d,Susd4,H2-Q6	13/88
13_Member	GO Biological Processes	GO:1903039	positive regulation of leukocyte cell-cell adhesion	-4.43559	-2.33202	11501,12394,12484,12507,13642,13848,14082,14972,15018,15024,15039,15040,15944,16173,16175,16190,16952,20304,20963,21926,22361,60533,63953,66824,69677,78317,110557	Adam8,Runx1,Cd24a,Cd5,Efnb2,Ephb6,Fadd,H2-K1,H2-Q7,H2-T10,H2-T22,H2-T23,Irgm1,Il18,Il1a,Il4ra,Anxa1,Ccl5,Syk,Tnf,Vnn1,Cd274,Dusp10,Pycard,Il36b,Ccdc88b,H2-Q6	27/296
13_Member	GO Biological Processes	GO:0032760	positive regulation of tumor necrosis factor production	-4.43551	-2.33202	12759,14082,14972,15018,15024,15039,15040,16173,16175,18708,20963,23960,66824,110557,246727,246728,246730	Clu,Fadd,H2-K1,H2-Q7,H2-T10,H2-T22,H2-T23,Il18,Il1a,Pik3r1,Syk,Oas1g,Pycard,H2-Q6,Oas3,Oas2,Oas1a	17/142
13_Member	GO Biological Processes	GO:0032656	regulation of interleukin-13 production	-4.40377	-2.30626	14972,15018,15024,15039,15040,16173,16364,22287,110557	H2-K1,H2-Q7,H2-T10,H2-T22,H2-T23,Il18,Irf4,Scgb1a1,H2-Q6	9/44
13_Member	GO Biological Processes	GO:0001911	negative regulation of leukocyte mediated cytotoxicity	-4.3621	-2.27386	14972,15018,15024,15039,15040,20709,20723,21354,93694,110557	H2-K1,H2-Q7,H2-T10,H2-T22,H2-T23,Serpinb9f,Serpinb9,Tap1,Clec2d,H2-Q6	10/55
13_Member	GO Biological Processes	GO:0050867	positive regulation of cell activation	-4.35963	-2.27386	11501,12394,12484,12507,13032,13642,13848,14082,14256,14972,15018,15024,15039,15040,15944,16173,16175,16190,16952,19294,20304,20963,21336,21926,22361,60533,63953,66824,69583,69677,78317,110557,171284,232946	Adam8,Runx1,Cd24a,Cd5,Ctsc,Efnb2,Ephb6,Fadd,Flt3l,H2-K1,H2-Q7,H2-T10,H2-T22,H2-T23,Irgm1,Il18,Il1a,Il4ra,Anxa1,Nectin2,Ccl5,Syk,Tacr1,Tnf,Vnn1,Cd274,Dusp10,Pycard,Tnfsf13,Il36b,Ccdc88b,H2-Q6,Timd2,Bloc1s3	34/419
13_Member	GO Biological Processes	GO:0016045	detection of bacterium	-4.35544	-2.27256	14972,15018,17948,17952,21946,110557,384997	H2-K1,H2-Q7,Naip2,Naip6,Pglyrp1,H2-Q6,Pglyrp4	7/26
13_Member	GO Biological Processes	GO:0032815	negative regulation of natural killer cell activation	-4.34103	-2.26669	14972,15018,15024,15039,15040,21946,110557,384997	H2-K1,H2-Q7,H2-T10,H2-T22,H2-T23,Pglyrp1,H2-Q6,Pglyrp4	8/35
13_Member	GO Biological Processes	GO:0032817	regulation of natural killer cell proliferation	-4.34103	-2.26669	14256,14972,15018,15024,15039,15040,16173,110557	Flt3l,H2-K1,H2-Q7,H2-T10,H2-T22,H2-T23,Il18,H2-Q6	8/35
13_Member	GO Biological Processes	GO:0050865	regulation of cell activation	-4.32213	-2.25596	11501,11622,11684,11846,12394,12484,12507,13032,13642,13848,14082,14256,14972,15018,15024,15039,15040,15944,16173,16175,16190,16854,16952,18003,19294,20304,20390,20963,21336,21926,21946,22040,22287,22361,26971,60533,63953,66824,69583,69677,78317,109594,110557,171284,230738,232946,384997,434215	Adam8,Ahr,Alox12,Arg1,Runx1,Cd24a,Cd5,Ctsc,Efnb2,Ephb6,Fadd,Flt3l,H2-K1,H2-Q7,H2-T10,H2-T22,H2-T23,Irgm1,Il18,Il1a,Il4ra,Lgals3,Anxa1,Nedd9,Nectin2,Ccl5,Sftpd,Syk,Tacr1,Tnf,Pglyrp1,Trex1,Scgb1a1,Vnn1,Pla2g2f,Cd274,Dusp10,Pycard,Tnfsf13,Il36b,Ccdc88b,Lmo1,H2-Q6,Timd2,Zc3h12a,Bloc1s3,Pglyrp4,Lrrc32	48/679
13_Member	GO Biological Processes	GO:0002863	positive regulation of inflammatory response to antigenic stimulus	-4.32192	-2.25596	12266,12484,14972,15018,15024,15039,15040,21926,110557	C3,Cd24a,H2-K1,H2-Q7,H2-T10,H2-T22,H2-T23,Tnf,H2-Q6	9/45
13_Member	GO Biological Processes	GO:0050671	positive regulation of lymphocyte proliferation	-4.25386	-2.19066	12484,14082,14256,14972,15018,15024,15039,15040,15944,16173,16175,16952,20304,20963,21336,60533,66824,78317,110557	Cd24a,Fadd,Flt3l,H2-K1,H2-Q7,H2-T10,H2-T22,H2-T23,Irgm1,Il18,Il1a,Anxa1,Ccl5,Syk,Tacr1,Cd274,Pycard,Ccdc88b,H2-Q6	19/176
13_Member	GO Biological Processes	GO:0002673	regulation of acute inflammatory response	-4.24742	-2.18968	11501,12266,14972,15018,15024,15039,15040,20304,21926,21934,75697,110557	Adam8,C3,H2-K1,H2-Q7,H2-T10,H2-T22,H2-T23,Ccl5,Tnf,Tnfrsf11a,C2cd4b,H2-Q6	12/80
13_Member	GO Biological Processes	GO:0050868	negative regulation of T cell activation	-4.22555	-2.17052	11846,12394,12484,14972,15018,15024,15039,15040,16190,16854,16952,20390,22287,26971,60533,110557,230738,434215	Arg1,Runx1,Cd24a,H2-K1,H2-Q7,H2-T10,H2-T22,H2-T23,Il4ra,Lgals3,Anxa1,Sftpd,Scgb1a1,Pla2g2f,Cd274,H2-Q6,Zc3h12a,Lrrc32	18/162
13_Member	GO Biological Processes	GO:0051251	positive regulation of lymphocyte activation	-4.16872	-2.11638	11501,12394,12484,12507,13642,13848,14082,14256,14972,15018,15024,15039,15040,15944,16173,16175,16190,16952,20304,20963,21336,22361,60533,63953,66824,69583,69677,78317,110557,232946	Adam8,Runx1,Cd24a,Cd5,Efnb2,Ephb6,Fadd,Flt3l,H2-K1,H2-Q7,H2-T10,H2-T22,H2-T23,Irgm1,Il18,Il1a,Il4ra,Anxa1,Ccl5,Syk,Tacr1,Vnn1,Cd274,Dusp10,Pycard,Tnfsf13,Il36b,Ccdc88b,H2-Q6,Bloc1s3	30/358
13_Member	GO Biological Processes	GO:0070663	regulation of leukocyte proliferation	-4.16285	-2.11584	11622,11846,12484,14082,14256,14972,15018,15024,15039,15040,15944,16173,16175,16854,16952,20304,20390,20963,21336,22287,26971,60533,66824,78317,109594,110557,434215	Ahr,Arg1,Cd24a,Fadd,Flt3l,H2-K1,H2-Q7,H2-T10,H2-T22,H2-T23,Irgm1,Il18,Il1a,Lgals3,Anxa1,Ccl5,Sftpd,Syk,Tacr1,Scgb1a1,Pla2g2f,Cd274,Pycard,Ccdc88b,Lmo1,H2-Q6,Lrrc32	27/307
13_Member	GO Biological Processes	GO:0032946	positive regulation of mononuclear cell proliferation	-4.15393	-2.11218	12484,14082,14256,14972,15018,15024,15039,15040,15944,16173,16175,16952,20304,20963,21336,60533,66824,78317,110557	Cd24a,Fadd,Flt3l,H2-K1,H2-Q7,H2-T10,H2-T22,H2-T23,Irgm1,Il18,Il1a,Anxa1,Ccl5,Syk,Tacr1,Cd274,Pycard,Ccdc88b,H2-Q6	19/179
13_Member	GO Biological Processes	GO:1903038	negative regulation of leukocyte cell-cell adhesion	-4.15393	-2.11218	11501,11846,12394,12484,14972,15018,15024,15039,15040,16190,16854,16952,20390,22287,26971,60533,110557,230738,434215	Adam8,Arg1,Runx1,Cd24a,H2-K1,H2-Q7,H2-T10,H2-T22,H2-T23,Il4ra,Lgals3,Anxa1,Sftpd,Scgb1a1,Pla2g2f,Cd274,H2-Q6,Zc3h12a,Lrrc32	19/179
13_Member	GO Biological Processes	GO:0098581	detection of external biotic stimulus	-4.06809	-2.04679	12363,14972,15018,17948,17952,21946,110557,384997	Casp4,H2-K1,H2-Q7,Naip2,Naip6,Pglyrp1,H2-Q6,Pglyrp4	8/38
13_Member	GO Biological Processes	GO:0051250	negative regulation of lymphocyte activation	-4.03772	-2.0189	11846,12394,12484,14972,15018,15024,15039,15040,16190,16854,16952,20390,21946,22287,26971,60533,110557,230738,384997,434215	Arg1,Runx1,Cd24a,H2-K1,H2-Q7,H2-T10,H2-T22,H2-T23,Il4ra,Lgals3,Anxa1,Sftpd,Pglyrp1,Scgb1a1,Pla2g2f,Cd274,H2-Q6,Zc3h12a,Pglyrp4,Lrrc32	20/198
13_Member	GO Biological Processes	GO:0031342	negative regulation of cell killing	-4.02673	-2.01283	14972,15018,15024,15039,15040,20709,20723,21354,93694,110557	H2-K1,H2-Q7,H2-T10,H2-T22,H2-T23,Serpinb9f,Serpinb9,Tap1,Clec2d,H2-Q6	10/60
13_Member	GO Biological Processes	GO:0098543	detection of other organism	-4.02427	-2.01283	14972,15018,17948,17952,21946,110557,384997	H2-K1,H2-Q7,Naip2,Naip6,Pglyrp1,H2-Q6,Pglyrp4	7/29
13_Member	GO Biological Processes	GO:0046640	regulation of alpha-beta T cell proliferation	-4.01526	-2.00626	12484,14972,15018,15024,15039,15040,15944,16173,20963,60533,110557	Cd24a,H2-K1,H2-Q7,H2-T10,H2-T22,H2-T23,Irgm1,Il18,Syk,Cd274,H2-Q6	11/72
13_Member	GO Biological Processes	GO:0032736	positive regulation of interleukin-13 production	-3.98327	-1.97668	14972,15018,15024,15039,15040,16173,16364,110557	H2-K1,H2-Q7,H2-T10,H2-T22,H2-T23,Il18,Irf4,H2-Q6	8/39
13_Member	GO Biological Processes	GO:0046635	positive regulation of alpha-beta T cell activation	-3.89311	-1.90076	12394,12484,14972,15018,15024,15039,15040,15944,16173,16190,16952,20963,110557	Runx1,Cd24a,H2-K1,H2-Q7,H2-T10,H2-T22,H2-T23,Irgm1,Il18,Il4ra,Anxa1,Syk,H2-Q6	13/100
13_Member	GO Biological Processes	GO:0002822	regulation of adaptive immune response based on somatic recombination of immune receptors built from immunoglobulin superfamily domains	-3.86285	-1.88281	11622,11846,12266,12484,14082,14972,15018,15024,15039,15040,16173,16190,16952,19294,21926,58185,60533,69583,96935,110557,230738,244202	Ahr,Arg1,C3,Cd24a,Fadd,H2-K1,H2-Q7,H2-T10,H2-T22,H2-T23,Il18,Il4ra,Anxa1,Nectin2,Tnf,Rsad2,Cd274,Tnfsf13,Susd4,H2-Q6,Zc3h12a,Nlrp10	22/236
13_Member	GO Biological Processes	GO:0032814	regulation of natural killer cell activation	-3.85132	-1.88172	14256,14972,15018,15024,15039,15040,16173,21946,110557,232946,384997	Flt3l,H2-K1,H2-Q7,H2-T10,H2-T22,H2-T23,Il18,Pglyrp1,H2-Q6,Bloc1s3,Pglyrp4	11/75
13_Member	GO Biological Processes	GO:0002507	tolerance induction	-3.82182	-1.86531	12773,14972,15018,15024,15039,15040,16365,110557	Ccr4,H2-K1,H2-Q7,H2-T10,H2-T22,H2-T23,Acod1,H2-Q6	8/41
13_Member	GO Biological Processes	GO:0032816	positive regulation of natural killer cell activation	-3.74312	-1.80746	14256,14972,15018,15024,15039,15040,16173,110557,232946	Flt3l,H2-K1,H2-Q7,H2-T10,H2-T22,H2-T23,Il18,H2-Q6,Bloc1s3	9/53
13_Member	GO Biological Processes	GO:0001796	regulation of type IIa hypersensitivity	-3.73451	-1.80746	12266,14972,15018,15024,15039,15040,110557	C3,H2-K1,H2-Q7,H2-T10,H2-T22,H2-T23,H2-Q6	7/32
13_Member	GO Biological Processes	GO:0001798	positive regulation of type IIa hypersensitivity	-3.73451	-1.80746	12266,14972,15018,15024,15039,15040,110557	C3,H2-K1,H2-Q7,H2-T10,H2-T22,H2-T23,H2-Q6	7/32
13_Member	GO Biological Processes	GO:0002892	regulation of type II hypersensitivity	-3.73451	-1.80746	12266,14972,15018,15024,15039,15040,110557	C3,H2-K1,H2-Q7,H2-T10,H2-T22,H2-T23,H2-Q6	7/32
[truncated: 215 more rows]

## Sheet: Depleted (sgMettl14 vs sgSHL)
GroupID	Category	Term	Description	LogP	Log(q-value)	Genes	Symbols	InTerm_InList
[truncated: 177 more rows]

[truncated: 2 more sheets: Enriched (dgPlgrkt vs dgSHL), Depleted (dgPlgrkt vs dgSHL)]
