# Supplementary material for: Aneuploidy drives the acquisition of cancer-specific driver genes
Source: Research Square preprint supplement (doi:10.21203/rs.3.rs-4941895/v1), 2024-09-04
Supplement: Supplementary file 10 [file f56ca1ed684eda477f006a7b.xlsx]

## Sheet: CSNK1A1_Basal_q25vs25
term_id	term_name	adjusted_p_val	term_size	overlap
REAC:R-HSA-156902	Peptide chain elongation	1.28019e-19	86	RPL13|RPL35|RPS2|FAU|RPL36|RPL35A|RPL14|RPS19|RPL38|RPS24|RPL18|RPS28|RPS16|RPL37|RPL27A|RPLP2|RPS7|RPS15|RPS20|RPL12|RPL8|RPL28|RPL29|RPS25|RPS6|RPL24|RPS3|RPS8|RPL30|RPL32|UBA52|RPL37A|RPS11|RPS9|RPL39|RPL27|RPL11|RPL18A|RPL31|RPL13A|RPL34|RPL22L1|RPS21|RPL19|RPL6|RPL5|RPL7A|RPL10|RPS15A|RPS18|RPLP1|RPL9|RPSA|RPS10|RPL23|RPS4X|RPL3
REAC:R-HSA-192823	Viral mRNA Translation	1.28019e-19	86	RPL13|RPL35|RPS2|FAU|RPL36|RPL35A|RPL14|RPS19|RPL38|RPS24|RPL18|RPS28|RPS16|RPL37|RPL27A|RPLP2|RPS7|RPS15|RPS20|RPL12|RPL8|RPL28|RPL29|RPS25|RPS6|RPL24|RPS3|RPS8|RPL30|RPL32|UBA52|RPL37A|RPS11|RPS9|RPL39|RPL27|RPL11|RPL18A|RPL31|RPL13A|RPL34|RPL22L1|RPS21|RPL19|RPL6|RPL5|RPL7A|RPL10|RPS15A|RPS18|RPLP1|RPL9|RPSA|RPS10|RPL23|RPS4X|RPL3
REAC:R-HSA-156842	Eukaryotic Translation Elongation	1.94577e-19	89	RPL13|RPL35|RPS2|FAU|RPL36|RPL35A|RPL14|RPS19|RPL38|RPS24|RPL18|RPS28|RPS16|RPL37|RPL27A|RPLP2|EEF1D|RPS7|RPS15|RPS20|RPL12|RPL8|RPL28|RPL29|RPS25|RPS6|RPL24|RPS3|RPS8|RPL30|RPL32|UBA52|RPL37A|RPS11|RPS9|RPL39|RPL27|RPL11|RPL18A|RPL31|RPL13A|RPL34|RPL22L1|RPS21|RPL19|RPL6|RPL5|RPL7A|RPL10|RPS15A|RPS18|RPLP1|RPL9|RPSA|RPS10|RPL23|RPS4X|RPL3
REAC:R-HSA-2408557	Selenocysteine synthesis	4.52388e-19	90	RPL13|RPL35|RPS2|FAU|RPL36|RPL35A|RPL14|RPS19|SEPSECS|RPL38|RPS24|RPL18|RPS28|RPS16|RPL37|RPL27A|RPLP2|RPS7|RPS15|RPS20|RPL12|RPL8|RPL28|RPL29|RPS25|RPS6|RPL24|RPS3|RPS8|RPL30|RPL32|UBA52|RPL37A|RPS11|RPS9|RPL39|RPL27|RPL11|RPL18A|RPL31|RPL13A|RPL34|RPL22L1|RPS21|RPL19|RPL6|RPL5|RPL7A|RPL10|RPS15A|RPS18|RPLP1|RPL9|RPSA|RPS10|RPL23|RPS4X|RPL3
REAC:R-HSA-72764	Eukaryotic Translation Termination	4.52388e-19	90	RPL13|RPL35|RPS2|FAU|RPL36|RPL35A|RPL14|RPS19|RPL38|RPS24|RPL18|TRMT112|RPS28|RPS16|RPL37|RPL27A|RPLP2|RPS7|RPS15|RPS20|RPL12|RPL8|RPL28|RPL29|RPS25|RPS6|RPL24|RPS3|RPS8|RPL30|RPL32|UBA52|RPL37A|RPS11|RPS9|RPL39|RPL27|RPL11|RPL18A|RPL31|RPL13A|RPL34|RPL22L1|RPS21|RPL19|RPL6|RPL5|RPL7A|RPL10|RPS15A|RPS18|RPLP1|RPL9|RPSA|RPS10|RPL23|RPS4X|RPL3
REAC:R-HSA-9633012	Response of EIF2AK4 (GCN2) to amino acid deficiency	2.97296e-18	98	RPL13|RPL35|RPS2|CEBPB|FAU|RPL36|RPL35A|RPL14|RPS19|RPL38|RPS24|RPL18|RPS28|RPS16|RPL37|RPL27A|RPLP2|RPS7|RPS15|RPS20|RPL12|RPL8|RPL28|RPL29|RPS25|RPS6|RPL24|RPS3|RPS8|RPL30|RPL32|UBA52|RPL37A|RPS11|RPS9|RPL39|RPL27|RPL11|RPL18A|RPL31|RPL13A|RPL34|RPL22L1|RPS21|RPL19|RPL6|RPL5|RPL7A|RPL10|RPS15A|RPS18|IMPACT|RPLP1|RPL9|DDIT3|RPSA|RPS10|RPL23
REAC:R-HSA-72689	Formation of a pool of free 40S subunits	9.72673e-18	98	RPL13|RPL35|RPS2|FAU|RPL36|RPL35A|RPL14|RPS19|RPL38|RPS24|RPL18|RPS28|RPS16|RPL37|RPL27A|RPLP2|RPS7|RPS15|RPS20|RPL12|EIF3G|RPL8|RPL28|RPL29|RPS25|RPS6|RPL24|RPS3|RPS8|RPL30|RPL32|UBA52|RPL37A|RPS11|RPS9|RPL39|RPL27|RPL11|RPL18A|RPL31|RPL13A|RPL34|RPL22L1|RPS21|RPL19|RPL6|RPL5|RPL7A|RPL10|RPS15A|RPS18|RPLP1|RPL9|RPSA|EIF3K|RPS10|RPL23|RPS4X|RPL3|EIF3L|RPL39L|RPS26|RPL7
REAC:R-HSA-975956	Nonsense Mediated Decay (NMD) independent of the Exon Junction Complex (EJC)	1.70919e-17	92	RPL13|RPL35|RPS2|FAU|RPL36|RPL35A|RPL14|RPS19|RPL38|RPS24|RPL18|RPS28|RPS16|RPL37|RPL27A|RPLP2|RPS7|RPS15|RPS20|RPL12|RPL8|RPL28|RPL29|RPS25|RPS6|RPL24|RPS3|RPS8|RPL30|RPL32|UBA52|RPL37A|RPS11|RPS9|RPL39|RPL27|RPL11|RPL18A|RPL31|RPL13A|RPL34|RPL22L1|RPS21|RPL19|RPL6|RPL5|RPL7A|RPL10|RPS15A|RPS18|RPLP1|RPL9|RPSA|RPS10|RPL23
REAC:R-HSA-927802	Nonsense-Mediated Decay (NMD)	5.81998e-16	112	SMG1|DCP1A|RPL13|SMG8|RPL35|RPS2|FAU|RPL36|RPL35A|RPL14|RPS19|RPL38|RPS24|RPL18|RNPS1|RPS28|RPS16|RPL37|RPL27A|RPLP2|RPS7|RPS15|RPS20|MAGOH|RPL12|RPL8|RPL28|RPL29|RPS25|RPS6|RPL24|RPS3|RPS8|RPL30|RPL32|UBA52|RPL37A|RPS11|RPS9|RPL39|RPL27|RPL11|RPL18A|RPL31|RPL13A|RPL34|RPL22L1|RPS21|RPL19|RPL6|RPL5|RPL7A|RPL10|RPS15A|RPS18|RPLP1|RPL9|RPSA|RPS10|RPL23
REAC:R-HSA-975957	Nonsense Mediated Decay (NMD) enhanced by the Exon Junction Complex (EJC)	5.81998e-16	112	SMG1|DCP1A|RPL13|SMG8|RPL35|RPS2|FAU|RPL36|RPL35A|RPL14|RPS19|RPL38|RPS24|RPL18|RNPS1|RPS28|RPS16|RPL37|RPL27A|RPLP2|RPS7|RPS15|RPS20|MAGOH|RPL12|RPL8|RPL28|RPL29|RPS25|RPS6|RPL24|RPS3|RPS8|RPL30|RPL32|UBA52|RPL37A|RPS11|RPS9|RPL39|RPL27|RPL11|RPL18A|RPL31|RPL13A|RPL34|RPL22L1|RPS21|RPL19|RPL6|RPL5|RPL7A|RPL10|RPS15A|RPS18|RPLP1|RPL9|RPSA|RPS10|RPL23
REAC:R-HSA-1799339	SRP-dependent cotranslational protein targeting to membrane	3.56377e-15	109	RPL13|RPL35|RPS2|FAU|RPL36|RPL35A|RPL14|RPS19|RPL38|RPS24|RPL18|RPS28|RPS16|RPL37|RPL27A|RPLP2|RPS7|RPS15|RPS20|RPL12|SEC61B|RPL8|RPL28|RPL29|RPS25|RPS6|RPL24|RPS3|RPS8|RPL30|RPL32|UBA52|RPL37A|RPS11|RPS9|RPL39|SSR4|RPL27|RPL11|RPL18A|RPL31|RPL13A|RPL34|SSR2|RPL22L1|RPS21|RPL19|RPL6|RPL5|RPL7A|RPL10|RPS15A|RPS18|RPLP1|RPL9|RPSA|RPS10|RPL23
REAC:R-HSA-168273	Influenza Viral RNA Transcription and Replication	4.60896e-15	129	RPL13|POLR2J|RPL35|POLR2F|RPS2|FAU|RPL36|RANBP2|RPL35A|RPL14|RPS19|RPL38|RPS24|RPL18|RPS28|RPS16|RPL37|RPL27A|RPLP2|RPS7|RPS15|RPS20|RPL12|POLR2I|NUP153|RPL8|POLR2H|RPL28|RPL29|RPS25|RPS6|RPL24|RPS3|RPS8|RPL30|RPL32|UBA52|RPL37A|RPS11|RPS9|RPL39|RPL27|RPL11|RPL18A|RPL31|RPL13A|RPL34|RPL22L1|RPS21|RPL19|NUP155|RPL6|RPL5|RPL7A|RPL10|NUP160|POLR2E|RPS15A|RPS18|RPLP1|RPL9
REAC:R-HSA-168255	Influenza Infection	8.5692e-15	148	RPL13|POLR2J|RPL35|POLR2F|RPS2|CLTC|FAU|RPL36|RANBP2|RPL35A|CANX|RPL14|RPS19|RPL38|RPS24|RPL18|RPS28|RPS16|RPL37|RPL27A|RPLP2|RPS7|RPS15|RPS20|RPL12|POLR2I|NUP153|RPL8|POLR2H|RPL28|RPL29|RPS25|RPS6|RPL24|RPS3|RPS8|RPL30|RPL32|UBA52|RPL37A|RPS11|RPS9|RPL39|RPL27|RPL11|RPL18A|RPL31|RPL13A|RPL34|EIF2AK2|RPL22L1|RPS21|SLC25A6|RPL19|NUP155|RPL6|RPL5|RPL7A|RPL10|NUP160|POLR2E|RPS15A|RPS18|CALR|RPLP1|RP…
REAC:R-HSA-156827	L13a-mediated translational silencing of Ceruloplasmin expression	1.17173e-14	108	RPL13|RPL35|RPS2|FAU|RPL36|RPL35A|RPL14|RPS19|RPL38|RPS24|RPL18|RPS28|RPS16|RPL37|RPL27A|RPLP2|RPS7|RPS15|RPS20|RPL12|EIF3G|RPL8|RPL28|RPL29|RPS25|RPS6|RPL24|RPS3|RPS8|RPL30|RPL32|UBA52|RPL37A|RPS11|RPS9|RPL39|RPL27|RPL11|RPL18A|RPL31|RPL13A|RPL34|RPL22L1|RPS21|RPL19|RPL6|RPL5|RPL7A|RPL10|RPS15A|RPS18|RPLP1|RPL9|RPSA|EIF3K|RPS10|RPL23
REAC:R-HSA-72706	GTP hydrolysis and joining of the 60S ribosomal subunit	2.06517e-14	109	RPL13|RPL35|RPS2|FAU|RPL36|RPL35A|RPL14|RPS19|RPL38|RPS24|RPL18|RPS28|RPS16|RPL37|RPL27A|RPLP2|RPS7|RPS15|RPS20|RPL12|EIF3G|RPL8|RPL28|RPL29|RPS25|RPS6|RPL24|RPS3|RPS8|RPL30|RPL32|UBA52|RPL37A|RPS11|RPS9|RPL39|RPL27|RPL11|RPL18A|RPL31|RPL13A|RPL34|RPL22L1|RPS21|RPL19|RPL6|RPL5|RPL7A|RPL10|RPS15A|RPS18|RPLP1|RPL9|RPSA|EIF3K|RPS10|RPL23
REAC:R-HSA-72312	rRNA processing	3.0373e-14	195	RPL13|MTREX|RPL35|EXOSC7|RPS2|XRN2|TSR3|FAU|GAR1|RPL36|DDX49|RPL35A|RPL14|RPS19|RRP1|CSNK1E|RPL38|EXOSC4|RPS24|RPL18|BOP1|TRMT112|RPS28|RPS16|RPL37|RPL27A|RPLP2|BUD23|RPS7|RPS15|RPS20|RRP9|RPL12|RPL8|RPL28|RPL29|RPS25|UTP20|RPS6|RPL24|RPS3|IMP4|RPS8|NOC4L|RPL30|RPL32|UBA52|RPL37A|RPS11|PELP1|HSD17B10|RPS9|RPL39|PRORP|RPL27|RPL11|RPL18A|RPL31|RPL13A|TBL3|RPL34|WDR46|RPL22L1|EXOSC5|RPS21|RPL19|FBL|…
REAC:R-HSA-8868773	rRNA processing in the nucleus and cytosol	4.85747e-14	186	RPL13|MTREX|RPL35|EXOSC7|RPS2|XRN2|TSR3|FAU|GAR1|RPL36|DDX49|RPL35A|RPL14|RPS19|RRP1|CSNK1E|RPL38|EXOSC4|RPS24|RPL18|BOP1|TRMT112|RPS28|RPS16|RPL37|RPL27A|RPLP2|BUD23|RPS7|RPS15|RPS20|RRP9|RPL12|RPL8|RPL28|RPL29|RPS25|UTP20|RPS6|RPL24|RPS3|IMP4|RPS8|NOC4L|RPL30|RPL32|UBA52|RPL37A|RPS11|PELP1|RPS9|RPL39|RPL27|RPL11|RPL18A|RPL31|RPL13A|TBL3|RPL34|WDR46|RPL22L1|EXOSC5|RPS21|RPL19|FBL|RPL6|RPL5|RPL7A…
REAC:R-HSA-6791226	Major pathway of rRNA processing in the nucleolus and cytosol	5.788e-14	177	RPL13|MTREX|RPL35|EXOSC7|RPS2|XRN2|FAU|RPL36|DDX49|RPL35A|RPL14|RPS19|RRP1|CSNK1E|RPL38|EXOSC4|RPS24|RPL18|BOP1|RPS28|RPS16|RPL37|RPL27A|RPLP2|BUD23|RPS7|RPS15|RPS20|RRP9|RPL12|RPL8|RPL28|RPL29|RPS25|UTP20|RPS6|RPL24|RPS3|IMP4|RPS8|NOC4L|RPL30|RPL32|UBA52|RPL37A|RPS11|PELP1|RPS9|RPL39|RPL27|RPL11|RPL18A|RPL31|RPL13A|TBL3|RPL34|WDR46|RPL22L1|EXOSC5|RPS21|RPL19|FBL|RPL6|RPL5|RPL7A|RPL10|RPS15A|RPS1…
REAC:R-HSA-2408522	Selenoamino acid metabolism	6.73279e-14	113	RPL13|RPL35|RPS2|FAU|RPL36|RPL35A|RPL14|RPS19|SEPSECS|RPL38|RPS24|RPL18|RPS28|RPS16|RPL37|RPL27A|RPLP2|RPS7|RPS15|RPS20|RPL12|RPL8|RPL28|RPL29|RPS25|RPS6|RPL24|RPS3|RPS8|RPL30|RPL32|UBA52|RPL37A|IARS1|RPS11|RPS9|RPL39|RPL27|RPL11|RPL18A|RPL31|RPL13A|RPL34|RPL22L1|RPS21|RPL19|RPL6|RPL5|RPL7A|RPL10|RPS15A|RPS18|RPLP1|RPL9|RPSA|RPS10|RPL23|TXNRD1|RPS4X|RPL3
REAC:R-HSA-9711097	Cellular response to starvation	7.5186e-14	149	FNIP1|RPL13|RPL35|RPS2|CEBPB|FAU|RPL36|RPL35A|RPL14|RPS19|RPL38|RPS24|RPL18|MTOR|RPS28|RPS16|RPL37|RPL27A|NPRL3|RPLP2|LAMTOR4|RPS7|RPS15|RPS20|RPL12|RPL8|RPL28|RPL29|RPS25|RPS6|RPL24|RPS3|RPS8|RPL30|RPL32|ATP6V1F|LAMTOR2|UBA52|RPL37A|RPS11|ATP6V1A|RPS9|KPTN|RPL39|MLST8|RPL27|RPL11|RPL18A|RPL31|RPL13A|FNIP2|RPL34|RPL22L1|RPS21|RPL19|RPL6|RPL5|RPL7A|RPL10|RPS15A|RPS18|IMPACT|RPLP1|RPL9|DDIT3
REAC:R-HSA-72613	Eukaryotic Translation Initiation	1.64012e-13	116	RPL13|RPL35|RPS2|FAU|RPL36|RPL35A|RPL14|RPS19|RPL38|RPS24|RPL18|RPS28|RPS16|RPL37|RPL27A|RPLP2|RPS7|RPS15|RPS20|RPL12|EIF3G|RPL8|RPL28|RPL29|RPS25|RPS6|RPL24|RPS3|RPS8|RPL30|RPL32|UBA52|RPL37A|RPS11|RPS9|RPL39|RPL27|RPL11|RPL18A|RPL31|RPL13A|RPL34|RPL22L1|RPS21|RPL19|RPL6|RPL5|RPL7A|RPL10|RPS15A|RPS18|EIF4EBP1|RPLP1|RPL9|RPSA|EIF3K|RPS10|RPL23
REAC:R-HSA-72737	Cap-dependent Translation Initiation	1.64012e-13	116	RPL13|RPL35|RPS2|FAU|RPL36|RPL35A|RPL14|RPS19|RPL38|RPS24|RPL18|RPS28|RPS16|RPL37|RPL27A|RPLP2|RPS7|RPS15|RPS20|RPL12|EIF3G|RPL8|RPL28|RPL29|RPS25|RPS6|RPL24|RPS3|RPS8|RPL30|RPL32|UBA52|RPL37A|RPS11|RPS9|RPL39|RPL27|RPL11|RPL18A|RPL31|RPL13A|RPL34|RPL22L1|RPS21|RPL19|RPL6|RPL5|RPL7A|RPL10|RPS15A|RPS18|EIF4EBP1|RPLP1|RPL9|RPSA|EIF3K|RPS10|RPL23
GO:0002181	cytoplasmic translation	9.64927e-12	152	CPEB4|DHX29|RPL13|RPL35|RPS2|FAU|RPL36|RPL35A|RPL14|RPS19|RPL38|RPS24|RPL18|MTOR|RPS28|RPS16|RPL37|RPL27A|RPLP2|EEF1D|RPS7|RPS15|RPS20|RPL12|EIF3G|RPL8|RPL28|RPL29|RPS25|RPS6|RPL24|RPS3|RPS8|RPL30|RPL32|UBA52|RPL37A|RPS11|RPS9|CPEB3|RPL39|RPL27|RPL11|RPL18A|DRG2|RPL31|RPL13A|RPL34|RPL22L1|RPS21|RPL19|RPL6|RPL5|RPL7A|RPL10|RPS15A|RPS18|IMPACT|RPLP1|RPL9|YBX1|RPSA|EIF3K|YBX3|RPS10|RPL23
REAC:R-HSA-9010553	Regulation of expression of SLITs and ROBOs	5.08585e-10	162	RPL13|RPL35|SEM1|USP33|RPS2|FAU|RPL36|RPL35A|RPL14|RPS19|RPL38|RPS24|RPL18|RNPS1|RPS28|RPS16|RPL37|RPL27A|RPLP2|RPS7|RPS15|RPS20|MAGOH|RPL12|RPL8|RPL28|RPL29|PSMB6|RPS25|RPS6|RPL24|RPS3|RPS8|RPL30|RPL32|UBA52|RPL37A|RPS11|PSMB4|RPS9|RPL39|ELOB|RPL27|RPL11|RPL18A|PSMD4|RPL31|RPL13A|PSMC3|RPL34|RPL22L1|RPS21|RPL19|RPL6|RPL5|RPL7A|RPL10|PSMB3|RPS15A|RPS18|RPLP1|RPL9
REAC:R-HSA-72766	Translation	3.91175e-09	284	GADD45GIP1|MRPS26|RPL13|MRPL4|RPL35|RPS2|MRPL16|FAU|RPL36|MRPL28|RPL35A|AURKAIP1|RPL14|RPS19|RPL38|RPS24|RPL18|TRMT112|RPS28|RPS16|RPL37|MRPL55|RPL27A|MRPL34|RPLP2|EEF1D|RPS7|RPS15|RPS20|MRPL2|MRPS12|MRPL12|RPL12|SEC61B|EIF3G|RPL8|RPL28|RPL29|GFM1|RPS25|MRPL9|RPS6|RPL24|RPS3|RPS8|MRPL52|MRPL41|RPL30|RPL32|CARS2|UBA52|RPL37A|IARS1|MRPS15|RPS11|MRPL14|MRPS2|RPS9|RPL39|SSR4|RPL27|RPL11|MRPS21|RPL18A…
REAC:R-HSA-376176	Signaling by ROBO receptors	8.24717e-08	205	RPL13|SOS2|RPL35|SEM1|USP33|RPS2|PFN1|FAU|RPL36|RPL35A|RPL14|RPS19|RPL38|RPS24|RPL18|CLASP2|RNPS1|PRKAR2A|RPS28|RPS16|RPL37|RPL27A|RPLP2|RPS7|RPS15|RPS20|MAGOH|RPL12|RPL8|RPL28|RPL29|PSMB6|RPS25|RPS6|RPL24|RPS3|RPS8|RPL30|RPL32|UBA52|RPL37A|RPS11|PSMB4|RPS9|RPL39|ELOB|RPL27|RPL11|RPL18A|PSMD4|RPL31|RPL13A|PSMC3|RPL34|RPL22L1|NCK2|AKAP5|RPS21|RPL19|RPL6|RPL5|RPL7A|RPL10|PSMB3|RPS15A|RPS18|RPLP1|RP…
REAC:R-HSA-8953854	Metabolism of RNA	2.65936e-06	678	TNPO1|DDX46|SMG1|DCP1A|CCDC12|CNOT6L|ISY1|LSM7|CTU2|TRMT1|PRKRIP1|CDC40|RPL13|QTRT1|MTREX|THOC6|SNRPA|SMG8|PQBP1|DDX39A|POLR2J|RBM42|RPL35|CNOT6|SEM1|GEMIN5|FAM50A|AQR|EXOSC7|POLR2F|RPS2|SNRPB|POP7|LSM10|XRN2|NXT1|XRN1|TSR3|FAU|GAR1|RPL36|RANBP2|TRMT61A|METTL14|DDX49|SART1|RPL35A|CNOT8|RPL14|SF3A2|RPS19|SNRNP70|RRP1|TUT7|CSNK1E|RPL38|EXOSC4|RPS24|LSM4|RPL18|BOP1|RNPS1|TRMT112|RPS28|RPS16|RPL37|RP…
GO:0006338	chromatin remodeling	6.29136e-06	541	NSD1|TRIP12|KDM3B|ATRX|CHD6|BPTF|ARID2|NIPBL|ZNHIT1|ARID4A|BCL7C|SPTY2D1|CARM1|MBD3|PBRM1|BAZ2A|SETD7|BCOR|KDM6A|TRIM37|CLOCK|ZNF304|ERCC6L2|TAF1|SMARCAD1|CHD9|SIRT7|ARID4B|ASH1L|CTR9|HCFC2|H2AX|CHD8|RIF1|REST|BABAM1|PRDM2|SIRT1|HLTF|SIN3A|ACTB|LMNA|ZNF445|EP300|BRPF3|NFAT5|SIRT6|KAT6B
GO:0006412	translation	1.03622e-05	630	IREB2|GIGYF2|LTN1|GADD45GIP1|DDX3X|CPEB4|PURA|LARP4|CNOT6L|BCLAF1|UHMK1|MRPS26|DHX29|RPL13|SECISBP2L|ELP1|MRPL4|RPL35|CNOT6|GEMIN5|EIF2AK3|RPS2|ELOF1|PTCD1|MRPL16|XRN1|DHPS|FAU|ASCC3|RPL36|MRPL28|METTL14|RPL35A|CNOT8|AURKAIP1|RPL14|RPS19|RNF14|SEPSECS|RPL38|RPS24|RPL18|RCHY1|MTOR|RPS28|RPS16|RPL37|MRPL55|RPL27A|NSUN5|RPUSD3|MRPL34|RPLP2|BZW1|EEF1D|MALSU1|RPS7|RPS15|RPS20|MAGOH|MRPL2|MRPS12|MRPL12…
GO:0016482	cytosolic transport	2.65509e-05	134	VPS13C|GCC2|STX10|CERT1|TRAPPC10|PIKFYVE|PREPL|SPAG9|HEATR5B|ANKFY1|RBSN|CORO7|SNX2|MON2|CLTC|HEATR5A|ATP9A|TBC1D5|SNX6|WASHC1|SLC66A2|AP1G1|RNF126|KIF16B|AP4M1|DOP1B|RAB14|VPS13A|EVI5|PLEKHJ1|KLHL20|KIF5B|TMEM87B|RIC1|ARFRP1
GO:0006325	chromatin organization	4.19498e-05	679	NSD1|TRIP12|KDM3B|ATRX|CHD6|BPTF|ARID2|NIPBL|ZNHIT1|ARID4A|BCL7C|SPTY2D1|CARM1|MBD3|PBRM1|BAZ2A|SETD7|BCOR|KDM6A|TRIM37|SLF2|CLOCK|ZNF304|ERCC6L2|TAF1|SMARCAD1|CHD9|SIRT7|ARID4B|SLF1|ASH1L|CTR9|HCFC2|TP53BP1|H2AX|PHF20|CHD8|RIF1|REST|FAM50A|BABAM1|PRDM2|SIRT1|HLTF|SIN3A|ACTB|LMNA|ZNF445|EP300|BRPF3|NFAT5|SIRT6|KAT6B|CHD4|ZBTB1|PWWP2B|BANF1|BAZ2B|EPC2|LRWD1|SUZ12|HDGFL2|BTAF1|NTMT1|CHD1|PIK3CA|MIE…
GO:0043043	peptide biosynthetic process	4.2428e-05	653	IREB2|GIGYF2|LTN1|GADD45GIP1|DDX3X|CPEB4|PURA|LARP4|CNOT6L|BCLAF1|UHMK1|MRPS26|DHX29|RPL13|SECISBP2L|ELP1|MRPL4|RPL35|CNOT6|GEMIN5|EIF2AK3|RPS2|ELOF1|PTCD1|MRPL16|XRN1|DHPS|FAU|ASCC3|RPL36|MRPL28|METTL14|RPL35A|CNOT8|AURKAIP1|RPL14|RPS19|RNF14|SEPSECS|RPL38|RPS24|RPL18|RCHY1|MTOR|RPS28|RPS16|RPL37|MRPL55|RPL27A|NSUN5|RPUSD3|MRPL34|RPLP2|BZW1|EEF1D|MALSU1|RPS7|RPS15|RPS20|MAGOH|MRPL2|MRPS12|MRPL12…
REAC:R-HSA-199991	Membrane Trafficking	0.000109483	592	DENND4C|PIK3C2A|GCC2|CHM|DENND4A|STX10|SEC24A|KIF3A|TRAPPC10|SYNJ1|KIF3B|PACSIN3|KIF2A|DCTN4|BLOC1S6|FCHO2|RALGAPB|TRAPPC8|GAPVD1|AP4E1|GOLGB1|TRIP11|EXOC5|TRIP10|KIF21A|CLINT1|USE1|NAA30|KLC3|ARPC4|TBC1D15|LNPEP|SNX2|TRAPPC11|TMF1|VPS4B|CPD|ACTB|MAN1A2|CLTC|ITSN2|AP4S1|AP3B1|RAB3GAP2|RAB33B|RABGEF1|RALGAPA2|ARF5|M6PR|ASPSCR1|TGOLN2|STAM2|SEC24B|SYT8|AP1G1|C2CD5|COPE|COPB1|RAB27B|KIF16B|USO1|NAA3…
GO:0016197	endosomal transport	0.000189335	278	GCC2|STX10|CERT1|EPG5|TRAPPC10|PIKFYVE|PREPL|SPAG9|DNAJC13|HEATR5B|ANKFY1|PIK3R4|RBSN|ACAP2|SNX2|VPS4B|VPS13B|CLTC|ITSN2|EHD1|HEATR5A|ZFYVE16|ATP9A|EEA1|STAM2|TBC1D5|SNX6|WASHC4|WASHC1|SLC66A2|AP1G1|RNF126|KIF16B|AP5M1|RAB11B|MVB12A|RILP|CHMP6|RAB13|AP5Z1|RAB14|ALS2CL|ALMS1|EVI5|SNX18|VPS37B|LMTK2|PLEKHJ1|SCARB2|SORL1|MAP2K2|TMEM87B|RIC1|ARFRP1|ANKRD50
GO:0016072	rRNA metabolic process	0.000430781	252	TRIR|WDR36|MTREX|WDR74|SIRT7|RPL35|EXOSC7|POP7|XRN2|SRFBP1|XRN1|TSR3|KRI1|GAR1|RPUSD1|DDX49|SART1|RPL35A|RPL14|RPS19|RRP1|RNASEL|EXOSC4|RPS24|BOP1|MTOR|TRMT112|RPS28|RPS16|GTF3C4|NSUN5|BUD23|RRS1|RPS7|RPS15|RRP9|RPS25|UTP20|RPS6|IMP4|RPS8|NOC4L|NPM3|SDE2|PELP1|KAT2B|RPL27|RPL11|DIS3L|NOP53|TBL3|MRTO4|WDR46|GTF3C5|EXOSC5|RPS21|DDX51|POP5|DDX54|FBL|GTF3C6|PIN4|RPL5|RPL7A|ERN2|PA2G4
GO:0006364	rRNA processing	0.000693559	214	WDR36|MTREX|WDR74|SIRT7|RPL35|EXOSC7|POP7|XRN2|SRFBP1|TSR3|KRI1|GAR1|RPUSD1|DDX49|SART1|RPL35A|RPL14|RPS19|RRP1|RNASEL|EXOSC4|RPS24|BOP1|TRMT112|RPS28|RPS16|NSUN5|BUD23|RRS1|RPS7|RPS15|RRP9|RPS25|UTP20|RPS6|IMP4|RPS8|NOC4L|NPM3|SDE2|PELP1|KAT2B|RPL27|RPL11|NOP53|TBL3|MRTO4|WDR46|EXOSC5|RPS21|DDX51|POP5|DDX54|FBL|PIN4|RPL5|RPL7A|PA2G4
GO:0042254	ribosome biogenesis	0.000933231	303	DDX3X|WDR36|DHX29|MTREX|WDR74|SIRT7|RPL35|EXOSC7|ZNF593|POP7|XRN2|SRFBP1|TSR3|KRI1|GAR1|RPUSD1|RPS19BP1|DDX49|SART1|RPL35A|RPL14|RPS19|RRP1|RNASEL|RPL38|EXOSC4|RPS24|BOP1|TRMT112|RPS28|RPS16|NSUN5|MALSU1|BUD23|RRS1|RPS7|RPS15|RRP9|MPV17L2|RPS25|UTP20|RPS6|RPL24|IMP4|RPS8|NOC4L|NOP16|NPM3|RPS11|SDE2|PELP1|KAT2B|MRPS2|RPS9|RPL27|RPL11|NOP53|TBL3|SURF6|MRTO4|WDR46|EXOSC5|RPS21|DDX51|POP5|DDX54|FBL|M…
REAC:R-HSA-5653656	Vesicle-mediated transport	0.00132893	625	DENND4C|PIK3C2A|GCC2|CHM|DENND4A|STX10|SEC24A|KIF3A|TRAPPC10|SYNJ1|KIF3B|PACSIN3|KIF2A|DCTN4|BLOC1S6|FCHO2|RALGAPB|TRAPPC8|GAPVD1|AP4E1|GOLGB1|TRIP11|EXOC5|TRIP10|KIF21A|CLINT1|USE1|NAA30|KLC3|ARPC4|TBC1D15|LNPEP|SNX2|TRAPPC11|TMF1|VPS4B|CPD|ACTB|MAN1A2|CLTC|ITSN2|AP4S1|AP3B1|RAB3GAP2|RAB33B|RABGEF1|RALGAPA2|ARF5|M6PR|ASPSCR1|TGOLN2|STAM2|SEC24B|SYT8|AP1G1|C2CD5|COPE|COPB1|RAB27B|KIF16B|USO1|NAA3…
GO:0016071	mRNA metabolic process	0.00137085	675	SON|IREB2|SETX|GIGYF2|DDX46|SCAF11|SMG1|DCP1A|PCBP4|CEP97|CNOT6L|BCLAF1|ISY1|CREB1|LSM7|SCAF8|RC3H2|PRKRIP1|CDC40|TUT1|MTREX|THOC6|SNRPA|SMG8|DAZAP1|RALY|TAF1|PQBP1|DDX39A|FASTK|ROCK1|RBM42|CENATAC|CNOT6|GEMIN5|CHD8|REST|FAM50A|AQR|EXOSC7|PUS1|HLTF|SNRPB|LSM10|IRF3|XRN2|ESS2|XRN1|AP3B1|ZBTB1|TRMT61A|NCOA2|METTL14|PUS7L|SART1|CNOT8|SF3A2|SNRNP70|TUT7|RNASEL|EXOSC4|LSM4
GO:0006281	DNA repair	0.00164662	558	RNF111|SETX|TRIP12|ATRX|ARID2|RFC1|NIPBL|SMG1|POLK|BCL7C|PAXX|MSH3|BOD1L1|RAD50|PBRM1|USP47|SLF2|ERCC6L2|TAOK1|SMARCAD1|SIRT7|FANCM|ERCC4|SLF1|TP53BP1|SEM1|POLA1|H2AX|RMI1|RIF1|BABAM1|MARF1|SIRT1|HLTF|NUDT1|ACTB|ZFYVE26|SLC30A9|SIRT6|CHD4|REV3L|ZBTB1|ASCC3|RAD23A|TREX2|EPC2|CSNK1E|HDGFL2|FAAP20|OTUB1|MPG|XRCC3|ALKBH2|EME2|TMEM161A|RCHY1|SHPRH|PNKP|RAD17|HELB|CDKN2D|INO80E|UBR5|MTA1|POLR2I|NBN|SMC…
GO:0048193	Golgi vesicle transport	0.00185904	284	VPS13C|ARFGEF2|GCC2|STX10|SEC24A|TRAPPC10|PREPL|TRAPPC8|YIPF7|CNST|YIPF5|TRIP11|VPS41|EXOC5|ANKFY1|RBSN|USE1|CORO7|SNX2|TRAPPC11|MON2|RAB33B|HTT|ARF5|ATP9A|SCAMP1|MACF1|SEC24B|AP1G1|COPE|COPB1|KIF16B|USO1|MYO5A|AP4M1|DOP1B|EXOC6|RAB13|SEC24D|RAB14|VPS13A|TRAPPC2L|TMED1|RAB3IP|GOLGA4|EXOC6B|SORL1|KLHL20|ARFRP1|EXOC8|TMED5|TRAPPC6A|SEC23B|TRAPPC13
GO:0006892	post-Golgi vesicle-mediated transport	0.00282232	101	VPS13C|ARFGEF2|PREPL|CNST|EXOC5|ANKFY1|RBSN|CORO7|MON2|SCAMP1|MACF1|AP1G1|KIF16B|MYO5A|AP4M1|DOP1B|EXOC6|RAB14|VPS13A|RAB3IP|GOLGA4|EXOC6B|SORL1|KLHL20|ARFRP1|EXOC8
REAC:R-HSA-9824446	Viral Infection Pathways	0.00314572	666	CSNK1A1|CCNT1|CHUK|SEC24A|PDPK1|ARID4A|CREB1|SAP30L|MBD3|TBK1|VPS41|RPL13|PIK3R4|TAF1|ARID4B|POLR2J|ROCK1|RPL35|SEM1|GEMIN5|REST|VPS4B|POLR2F|RPS2|CLTC|SNRPB|EP300|G3BP2|IRF3|ITCH|CHD4|PTPN11|FAU|RPL36|RANBP2|BANF1|TAB3|RPL35A|PRKCSH|CANX|RPL14|RPS19|SUZ12|RPL38|CEBPD|RPS24|RPL18|SEC24B|PPIB|RPS28|RPS16|RPL37|RPL27A|ZDHHC8|SNRPD2|AP1G1|RPLP2|RPS7|RPS15|RPS20|MTA1|RPL12|MVB12A|POLR2I|CHMP6|NR3C1|N…
GO:0006886	intracellular protein transport	0.0035569	654	VPS13C|TNPO1|SPG11|GCC2|TRIM23|CHM|APPBP2|IPO11|STX10|SEC24A|KIF3A|IPO7|UHMK1|EDEM1|CTDSPL2|TIMM44|AP4E1|IPO8|VPS41|TRIM37|WDR11|PIK3R4|VPS13D|SIRT7|B3GAT3|USP9X|SNX2|FAF2|NUP58|APPL1|RILPL1|SYNRG|LMNA|CLTC|EP300|TOMM40|EMD|SIRT6|EHD1|AP4S1|NXT1|AP3B1|RAB3GAP2|PEX1|PTPN11|RANBP2|NF1|HYAL2|ICE1|ZFAND2B|PPM1A|SEL1L|ARF5|ZFYVE16|M6PR|ASPSCR1|STAM2|SEC24B|SNX6|ROMO1|PEX14|PDCD5|CEP131|AP1G1|C2CD5|COP…
GO:0072666	establishment of protein localization to vacuole	0.00391468	59	VPS13C|GCC2|VPS41|PIK3R4|VPS13D|AP3B1|ZFYVE16|M6PR|STAM2|AP4M1|MVB12A|NCOA4|VPS13A|VPS37B|SCARB2|SORL1|MON1A|NEDD4|HGS|NAGPA
GO:0010498	proteasomal protein catabolic process	0.00509598	470	CSNK1A1|FBXW11|UBR1|APC|PJA2|TRIP12|APPBP2|UBE3A|LTN1|SOCS4|UBR3|FBXL17|EDEM1|DDA1|FBXO38|CLOCK|GIPC1|FEM1B|HECTD1|TAF1|USP9X|SEM1|CDC34|USP38|TMF1|FAF2|DDI2|SIRT1|SIRT6|ITCH|UBXN1|ASCC3|RAD23A|ZFAND2B|RNF14|CSNK1E|SEL1L|TMTC3|KLHL42|TMX1|SPOPL|ANAPC11|SPSB3|EDEM3|RCHY1|FEM1C|AXIN1|RCN3|UBXN11|ZYG11B|ZNRF1|ANAPC15
REAC:R-HSA-72695	Formation of the ternary complex, and subsequently, the 43S complex	0.00522097	50	RPS2|FAU|RPS19|RPS24|RPS28|RPS16|RPS7|RPS15|RPS20|EIF3G|RPS25|RPS6|RPS3|RPS8|RPS11|RPS9|RPS21|RPS15A|RPS18|RPSA|EIF3K|RPS10|RPS4X|EIF3L|RPS26
REAC:R-HSA-3247509	Chromatin modifying enzymes	0.00634933	224	NSD1|KDM3B|ARID2|ARID4A|SAP30L|CARM1|MBD3|PBRM1|SETD7|KDM6A|CLOCK|ELP1|ARID4B|ASH1L|H2AX|PHF20|REST|BRWD1|RPS2|ACTB|EP300|BRPF3|KAT6B|CHD4
REAC:R-HSA-4839726	Chromatin organization	0.00634933	224	NSD1|KDM3B|ARID2|ARID4A|SAP30L|CARM1|MBD3|PBRM1|SETD7|KDM6A|CLOCK|ELP1|ARID4B|ASH1L|H2AX|PHF20|REST|BRWD1|RPS2|ACTB|EP300|BRPF3|KAT6B|CHD4
GO:0042147	retrograde transport, endosome to Golgi	0.0102347	95	GCC2|STX10|CERT1|TRAPPC10|PIKFYVE|PREPL|SPAG9|HEATR5B|ANKFY1|RBSN|SNX2|CLTC|HEATR5A|ATP9A|TBC1D5|SNX6|WASHC1|SLC66A2|RNF126|EVI5|PLEKHJ1|TMEM87B|RIC1|ARFRP1
GO:0043161	proteasome-mediated ubiquitin-dependent protein catabolic process	0.0104597	381	CSNK1A1|FBXW11|UBR1|APC|PJA2|TRIP12|APPBP2|UBE3A|LTN1|SOCS4|UBR3|FBXL17|DDA1|FBXO38|CLOCK|GIPC1|FEM1B|HECTD1|TAF1|USP9X|SEM1|CDC34|USP38|FAF2|SIRT1|SIRT6|ITCH|UBXN1|ASCC3|RAD23A|ZFAND2B|RNF14|CSNK1E|KLHL42|SPOPL|ANAPC11|SPSB3|RCHY1|FEM1C|AXIN1|UBXN11|ZYG11B|ZNRF1|ANAPC15
GO:0007030	Golgi organization	0.015079	137	CSNK1A1|GCC2|TRAPPC8|YIPF7|YIPF5|GOLGB1|TRIP11|RBSN|LYSMD3|CORO7|TRAPPC11|ATP8B1|VPS13B|AKAP9|DYNC2H1|RAB33B|ATP8B4|HTT
GO:0010564	regulation of cell cycle process	0.0166031	654	APC|GIGYF2|ATRX|ARID2|BIRC6|CEP120|PPP1R35|NAA10|DDX3X|WAPL|CEP97|KIF3B|BCL7C|RAD50|PBRM1|USP47|TRIM37|SLF2|CLOCK|CCNQ|PIK3R4|TAOK1|GIPC1|FEM1B|TAF1|SMC2|PINX1|SLF1|ANKRD17|TP53BP1|CENATAC|H2AX|APPL1|PHIP|VPS4B|BABAM1|TPRA1|SIRT1|SIN3A|MIIP|ACTB|CLTC|ZFYVE26|LSM10
GO:0007005	mitochondrion organization	0.0191372	466	VPS13C|BAX|MIGA1|ATG2B|SLC25A46|MTX3|LRBA|NDUFA11|UQCC3|VPS13D|SIRT7|TMEM11|TSPO|APOOL|LMNA|EP300|TOMM40|COA8|SLC30A9|NDUFS1|ATP7A|AP3B1|HTT|ATAD3B|SIVA1|SDHAF2|SCO2|NDUFS5|CDC37|LYRM7|FKBP8|BBC3|MICOS13|LIPA|COA4|ROMO1|PDCD5|ZNF205|PTCD2|CHCHD6|ATP2A1|NDUFB7|SDHAF1|ATAD3A|ATP5F1D|NDUFB10|NDUFAF8|VPS13A|ATG4D|ENDOG|MAN2A1|CHCHD10|TIMM8B|FBXL4|SSBP1|WDR45|ATP5IF1|MTM1|HSD17B10|NDUFS7|TIMM13|KIF5B|…
GO:0045814	negative regulation of gene expression, epigenetic	0.0219875	113	TRIP12|ATRX|SPTY2D1|MBD3|BAZ2A|TRIM37|ZNF304|SIRT7|CTR9|RIF1|SIRT1|SIN3A|LMNA|ZNF445|SIRT6
GO:0022613	ribonucleoprotein complex biogenesis	0.024399	448	SETX|DDX46|SCAF11|DDX3X|ISY1|WDR36|DHX29|MTREX|WDR74|SIRT7|RPL35|GEMIN5|EXOSC7|SNRPB|ZNF593|POP7|DICER1|XRN2|SRFBP1|TSR3|KRI1|GAR1|RPUSD1|RPS19BP1|DDX49|SART1|RPL35A|RPL14|SF3A2|RPS19|RRP1|RNASEL|RPL38|EXOSC4|RPS24|LSM4|BOP1|TRMT112|RPS28|RPS16|NSUN5|SNRPD2|MALSU1|BUD23|RRS1|RPS7|RPS15|RRP9|EIF3G|SRPK2|TSSC4|MPV17L2|RPS25|UTP20|RPS6|RPL24|IMP4|RPS8|NOC4L|NOP16|NPM3|RPS11|SDE2|PELP1|KAT2B|MRPS2|RP…
REAC:R-HSA-2262752	Cellular responses to stress	0.0253443	701	FNIP1|FBXL17|CREB1|EDEM1|DCTN4|CARM1|RAD50|RPL13|CLOCK|CREBRF|PHC3|CHD9|RPL35|SEM1|H2AX|EIF2AK3|EXOSC7|SIRT1|RPS2|SIN3A|LMNA|EP300|CEBPB|ATP7A|MBTPS2|FAU|RPL36|RANBP2|RPS19BP1|NCOA2|COX4I1|RORA|RPL35A|RPL14|RPS19|SUZ12|RPL38|SCO2|EXOSC4|RPS24|RPL18|ANAPC11|CCS|MTOR|ANAPC15|RPS28|RPS16|RPL37|RPL27A|CDKN2D|NPRL3|RPLP2|MAFK|LAMTOR4|RPS7|RPS15|RPS20|RPL12|NR3C1|NBN|NUP153|RPL8|RPL28|RPL29|PSMB6|RPS25…
GO:0007041	lysosomal transport	0.027747	120	GCC2|EPG5|VPS41|ANKFY1|PIK3R4|RBSN|USE1|VPS4B|AP3B1|TMEM106B|ZFYVE16|M6PR|SCYL2|LIPA|AP1G1|PLEKHF2|AP4M1|MVB12A|UEVLD|RILP|CHMP6|NCOA4|SCARB2|MTM1|SORL1|NEDD4|HGS|NAGPA|IGF2R|DTX3L|LYST|CHMP1A|SLC30A4|KIF13A|GNPTG|LRRK2|VPS51|HSPA8|HOOK1|SPTBN5|BIN1|RAB7B|ARSB|PLEKHF1
REAC:R-HSA-9705683	SARS-CoV-2-host interactions	0.0278496	169	CHUK|SEC24A|PDPK1|TBK1|VPS41|PIK3R4|GEMIN5|RPS2|SNRPB|G3BP2|IRF3|PTPN11|FAU|RANBP2|TAB3|RPS19|RPS24|SEC24B|RPS28|RPS16|SNRPD2|RPS7|RPS15|RPS20|NUP153|RPS25|RPS6|SEC24D|RPS3|RPS8|UBA52|RPS11
REAC:R-HSA-8953897	Cellular responses to stimuli	0.0330154	710	FNIP1|FBXL17|CREB1|EDEM1|DCTN4|CARM1|RAD50|RPL13|CLOCK|CREBRF|PHC3|CHD9|RPL35|SEM1|H2AX|EIF2AK3|EXOSC7|SIRT1|RPS2|SIN3A|LMNA|EP300|CEBPB|ATP7A|MBTPS2|FAU|RPL36|RANBP2|RPS19BP1|NCOA2|COX4I1|RORA|RPL35A|MTF1|RPL14|RPS19|SUZ12|RPL38|SCO2|EXOSC4|RPS24|RPL18|ANAPC11|CCS|MTOR|ANAPC15|RPS28|RPS16|RPL37|RPL27A|CDKN2D|NPRL3|RPLP2|MAFK|LAMTOR4|RPS7|RPS15|RPS20|RPL12|NR3C1|NBN|NUP153|RPL8|RPL28|RPL29|PSMB6|…
GO:0034470	ncRNA processing	0.0344549	406	WDR36|INTS2|CTU2|TRMT1|TUT1|QTRT1|MTREX|ELP1|WDR74|SIRT7|RPL35|EXOSC7|PUS1|POP7|DICER1|PTCD1|XRN2|SRFBP1|TSR3|KRI1|GAR1|RPUSD1|TRMT61A|DDX49|SART1|DTWD2|RPL35A|RPL14|RPS19|DUS1L|RRP1|TUT7|RNASEL|SEPSECS|EXOSC4|RPS24|BOP1|TRMT112|RPS28|RPS16|NSUN5|TRMT2A|BUD23|RRS1|RPS7|RPS15|RRP9|ADAT1|PUSL1|RPS25|UTP20|RPS6|IMP4|RPS8|TRMU|NOC4L
REAC:R-HSA-5389840	Mitochondrial translation elongation	0.0349582	85	GADD45GIP1|MRPS26|MRPL4|MRPL16|MRPL28|AURKAIP1|MRPL55|MRPL34|MRPL2|MRPS12|MRPL12|GFM1|MRPL9|MRPL52|MRPL41|MRPS15|MRPL14|MRPS2|MRPS21|MRPS34|MRPL24|MRPL23|MRPL11|MRPL36|MRPL58|TUFM|CHCHD1|MRPL57|MRPS9
REAC:R-HSA-9692914	SARS-CoV-1-host interactions	0.0366779	91	PDPK1|TBK1|RPS2|EP300|IRF3|ITCH|FAU|RPS19|RPS24|PPIB|RPS28|RPS16|RPS7|RPS15|RPS20|RPS25|RPS6|RPS3|RPS8|UBA52|RPS11|RPS9
REAC:R-HSA-72662	Activation of the mRNA upon binding of the cap-binding complex and eIFs, and subsequent binding to 43S	0.0412024	58	RPS2|FAU|RPS19|RPS24|RPS28|RPS16|RPS7|RPS15|RPS20|EIF3G|RPS25|RPS6|RPS3|RPS8|RPS11|RPS9|RPS21|RPS15A|RPS18|EIF4EBP1|RPSA|EIF3K|RPS10|RPS4X|EIF3L|RPS26
REAC:R-HSA-9675108	Nervous system development	0.0412921	533	CREB1|RPL13|RASA1|EPHA1|ARPC4|ROCK1|SOS2|RPL35|SEM1|ARHGAP35|USP33|RPS2|ACTB|CLTC|PFN1|ARHGEF12|EFNA4|PTPN11|FAU|RPL36|RPL35A|RPL14|RPS19|EFNB1|RPL38|RPS24|COL9A3|PIK3CA|RPL18|SCN11A|CLASP2|RNPS1|PRKAR2A|RPS28|RPS16|RPL37|RPL27A|FRS2|RPLP2|GAB1|RPS7|RPS15|RPS20|MAGOH|RPL12|LYPLA2|CFL1|RPL8|RPL28|RPL29|HMGCR|PSMB6|RPS25|ITGAV|RPS6|RPL24|HRAS|TRIO|RPS3|RPS8|EPHA2|RPL30|RPL32|UBA52|RPL37A|TUBB4B|RPS…

## Sheet: FBXW7_Basal_q25vs25
term_id	term_name	adjusted_p_val	term_size	overlap
GO:0002250	adaptive immune response	1.09936e-13	373	MALT1|RIF1|HRAS|P2RX7|ATAD5|RC3H2|CLEC7A|LAX1|CD160|CTSS|PKN1|PRKCZ|NECTIN2|TXK|TNFAIP3|CD226|STAT4|RORA|CR1|KLRD1|PIK3CG|PAG1|FYN|ADCY7|PTPRC|PYCARD|PDCD1LG2|CSF2RB|TLR4|KLHL6|PRKCB|TNFSF13B|IRF4|BTLA|SLAMF7|TRPM4|RFTN1|IRF7|JUNB|BTN3A1|MPEG1|LYN|IL18R1|TLR8|BACH2|EOMES|BTK|CD84|CD28|THEMIS|ITK|JCHAIN|INPP5D|SLAMF6|NLRP3|CD3G|IL6R|NCKAP1L|CCR2|IL10|CTSC|BTN3A3|PRR7|CD80|CD244|LILRB5|TNF|PRKCQ|CD…
REAC:R-HSA-156842	Eukaryotic Translation Elongation	3.77949e-13	89	RPS15|RPL36AL|EEF1D|RPLP1|RPL28|RPL18|RPL26L1|FAU|RPL35|RPS9|RPS28|RPL24|RPL14|RPS14|RPL36|RPL29|RPL32|RPS2|RPS5|RPL8|RPS19|RPL12|RPLP2|RPS3|RPL3|EEF2|RPL11|RPL41|RPS27L|RPL38|RPL37A|RPL13A|RPL13|RPS8|EEF1A2|RPS16|RPS11
GO:0046649	lymphocyte activation	1.04334e-12	678	PRDX2|SOS1|BAD|MALT1|RIF1|STK11|ATP11C|ATM|GPAM|PTPN11|CYLD|SART1|KMT2A|PRELID1|P2RX7|ATAD5|MIF|PTPN22|RC3H2|SOD1|DOCK8|ZFPM1|CLEC7A|LAX1|DOCK11|IKZF3|RHBDD3|CD160|CD151|NLRC3|VNN1|RPS3|TMEM131L|IMPDH2|KIT|PKN1|LGALS1|PRKCZ|PTGER4|LEPR|TNFAIP3|CHD7|STAT4|IL7|RORA|CR1|KLRD1|SMARCD3|PIK3CG|GPNMB|PAG1|FYN|PTPRC|CD38|JAG2|PYCARD|PDCD1LG2|TNFSF14|TLR4|PRKDC|CLNK|VCAM1|CD320|MFAP3|PRKCB|TNFSF13B|IRF4|T…
REAC:R-HSA-72766	Translation	1.35713e-12	284	MRPL54|RPS15|EIF3G|MRPL34|MRPS34|AURKAIP1|MRPL52|RPL36AL|MRPL28|MRPL4|GADD45GIP1|MRPL57|MRPS11|MRPL22|SRP14|EEF1D|MRPL55|RPLP1|RPL28|RPL18|RPL26L1|MRPL41|FAU|TUFM|RPL35|MRPL12|RPS9|RPS28|RPL24|RPL14|MRPL20|RPS14|RPL36|MRPL24|SEC61B|APEH|MRPL27|MRPS12|MRPL23|RPL29|EIF3K|RPL32|RPS2|RPS5|RPL8|MRPL40|MRPS26|RPS19|RPL12|MRPS15|TRMT112|RPLP2|RPS3|MRPL58|MRPL14|RPL3|EEF2|RPL11|RPL41|RPS27L|MRPL21|SSR4|R…
REAC:R-HSA-72764	Eukaryotic Translation Termination	4.2344e-12	90	RPS15|RPL36AL|RPLP1|RPL28|RPL18|RPL26L1|FAU|RPL35|RPS9|RPS28|RPL24|RPL14|RPS14|RPL36|APEH|RPL29|RPL32|RPS2|RPS5|RPL8|RPS19|RPL12|TRMT112|RPLP2|RPS3|RPL3|RPL11|RPL41|RPS27L|RPL38|RPL37A|RPL13A|RPL13|RPS8|RPS16|RPS11
GO:0050865	regulation of cell activation	4.74676e-12	534	PRDX2|SOS1|BAD|MALT1|RIF1|ATP11C|ATM|GPAM|PTPN11|CYLD|SART1|PRELID1|ATAD5|MIF|PTPN22|RC3H2|SOD1|FER|DOCK8|CLEC7A|LAX1|IKZF3|RHBDD3|CD160|VNN1|RPS3|TMEM131L|PKN1|LGALS1|PRKCZ|NECTIN2|TXK|TNFAIP3|CD226|IL7|RORA|CR1|KLRD1|SMARCD3|GPNMB|PAG1|FYN|RABGEF1|PTPRC|CD38|PYCARD|PDCD1LG2|TNFSF14|TLR4|PRKDC|CLNK|VCAM1|CD320|TNFSF13B|IRF4|TESPA1|LRRK2|JUNB|IL15|FGL2|RIPOR2|STAP1|LYN|MERTK|BTK|CD84|PDGFRA|CD28|…
REAC:R-HSA-156902	Peptide chain elongation	5.54072e-12	86	RPS15|RPL36AL|RPLP1|RPL28|RPL18|RPL26L1|FAU|RPL35|RPS9|RPS28|RPL24|RPL14|RPS14|RPL36|RPL29|RPL32|RPS2|RPS5|RPL8|RPS19|RPL12|RPLP2|RPS3|RPL3|EEF2|RPL11|RPL41|RPS27L|RPL38|RPL37A|RPL13A|RPL13|RPS8|RPS16|RPS11
GO:0002694	regulation of leukocyte activation	7.86663e-12	487	PRDX2|SOS1|BAD|MALT1|RIF1|ATP11C|ATM|GPAM|PTPN11|CYLD|SART1|PRELID1|ATAD5|MIF|PTPN22|RC3H2|SOD1|FER|DOCK8|CLEC7A|LAX1|IKZF3|RHBDD3|CD160|VNN1|RPS3|TMEM131L|PKN1|LGALS1|PRKCZ|NECTIN2|TNFAIP3|CD226|IL7|RORA|CR1|KLRD1|SMARCD3|GPNMB|PAG1|FYN|RABGEF1|PTPRC|CD38|PYCARD|PDCD1LG2|TNFSF14|TLR4|PRKDC|CLNK|VCAM1|CD320|TNFSF13B|IRF4|TESPA1|LRRK2|JUNB|IL15|FGL2|RIPOR2|STAP1|LYN|MERTK|BTK|CD84|CD28|SLAMF8|CD20…
REAC:R-HSA-163200	Respiratory electron transport, ATP synthesis by chemiosmotic coupling, and heat production by uncoupling proteins.	2.75218e-11	113	ATP5F1D|UQCRC1|NDUFS7|NDUFB10|ECSIT|COX6B1|NDUFA2|NDUFS3|NDUFS6|NDUFB7|UQCRQ|COX5B|NDUFAF3|NDUFS8|NDUFB2|COX7C|NDUFA3|ATP5PF|COX4I1|SCO2|COX5A|COX8A|ATP5ME|NDUFB11|ATP5MC2|NDUFB1|ATP5MC1|NDUFB4|NDUFA1|CYC1|ATP5PO|UQCR10|NDUFS5|SURF1|TRAP1|ATP5PD|COX6A1|ETFB|ATP5F1E|ATP5MF
GO:0042110	T cell activation	2.82851e-11	474	PRDX2|SOS1|BAD|MALT1|STK11|GPAM|PTPN11|CYLD|SART1|KMT2A|PRELID1|P2RX7|PTPN22|RC3H2|SOD1|DOCK8|ZFPM1|CLEC7A|LAX1|IKZF3|CD160|CD151|NLRC3|VNN1|RPS3|TMEM131L|KIT|LGALS1|PRKCZ|PTGER4|LEPR|CHD7|STAT4|IL7|RORA|CR1|SMARCD3|PIK3CG|GPNMB|PAG1|FYN|PTPRC|JAG2|PYCARD|PDCD1LG2|TNFSF14|PRKDC|VCAM1|MFAP3|TNFSF13B|IRF4|TESPA1|SLAMF7|RAB29|JUNB|IL15|FGL2|RIPOR2|BTN3A1|LYN|IL18R1|EOMES|CD84|CD28|THEMIS|APBB1IP|ITK…
REAC:R-HSA-2408557	Selenocysteine synthesis	2.91113e-11	90	RPS15|RPL36AL|EEFSEC|RPLP1|RPL28|RPL18|RPL26L1|FAU|RPL35|RPS9|RPS28|RPL24|RPL14|RPS14|RPL36|RPL29|RPL32|RPS2|RPS5|RPL8|RPS19|RPL12|RPLP2|RPS3|RPL3|RPL11|RPL41|RPS27L|RPL38|RPL37A|RPL13A|RPL13|RPS8|RPS16|RPS11
REAC:R-HSA-192823	Viral mRNA Translation	3.9165e-11	86	RPS15|RPL36AL|RPLP1|RPL28|RPL18|RPL26L1|FAU|RPL35|RPS9|RPS28|RPL24|RPL14|RPS14|RPL36|RPL29|RPL32|RPS2|RPS5|RPL8|RPS19|RPL12|RPLP2|RPS3|RPL3|RPL11|RPL41|RPS27L|RPL38|RPL37A|RPL13A|RPL13|RPS8|RPS16|RPS11
REAC:R-HSA-72689	Formation of a pool of free 40S subunits	9.69121e-11	98	RPS15|EIF3G|RPL36AL|RPLP1|RPL28|RPL18|RPL26L1|FAU|RPL35|RPS9|RPS28|RPL24|RPL14|RPS14|RPL36|RPL29|EIF3K|RPL32|RPS2|RPS5|RPL8|RPS19|RPL12|RPLP2|RPS3|RPL3|RPL11|RPL41|RPS27L|RPL38|RPL37A|RPL13A|RPL13|RPS8|RPS16|RPS11
REAC:R-HSA-975956	Nonsense Mediated Decay (NMD) independent of the Exon Junction Complex (EJC)	4.05903e-10	92	RPS15|RPL36AL|RPLP1|RPL28|RPL18|RPL26L1|FAU|RPL35|RPS9|RPS28|RPL24|RPL14|RPS14|RPL36|RPL29|RPL32|RPS2|RPS5|RPL8|RPS19|RPL12|RPLP2|RPS3|RPL3|RPL11|RPL41|RPS27L|RPL38|RPL37A|RPL13A|RPL13|RPS8|RPS16|RPS11
REAC:R-HSA-156827	L13a-mediated translational silencing of Ceruloplasmin expression	5.33927e-10	108	RPS15|EIF3G|RPL36AL|RPLP1|RPL28|RPL18|RPL26L1|FAU|RPL35|RPS9|RPS28|RPL24|RPL14|RPS14|RPL36|RPL29|EIF3K|RPL32|RPS2|RPS5|RPL8|RPS19|RPL12|RPLP2|RPS3|RPL3|RPL11|RPL41|RPS27L|RPL38|RPL37A|RPL13A|RPL13|RPS8|EIF4A1|RPS16|RPS11
REAC:R-HSA-1799339	SRP-dependent cotranslational protein targeting to membrane	7.3968e-10	109	RPS15|RPL36AL|SRP14|RPLP1|RPL28|RPL18|RPL26L1|FAU|RPL35|RPS9|RPS28|RPL24|RPL14|RPS14|RPL36|SEC61B|RPL29|RPL32|RPS2|RPS5|RPL8|RPS19|RPL12|RPLP2|RPS3|RPL3|RPL11|RPL41|RPS27L|SSR4|RPL38|RPL37A|RPL13A|RPL13|RPS8|RPS16|RPS11
REAC:R-HSA-72706	GTP hydrolysis and joining of the 60S ribosomal subunit	7.3968e-10	109	RPS15|EIF3G|RPL36AL|RPLP1|RPL28|RPL18|RPL26L1|FAU|RPL35|RPS9|RPS28|RPL24|RPL14|RPS14|RPL36|RPL29|EIF3K|RPL32|RPS2|RPS5|RPL8|RPS19|RPL12|RPLP2|RPS3|RPL3|RPL11|RPL41|RPS27L|RPL38|RPL37A|RPL13A|RPL13|RPS8|EIF4A1|RPS16|RPS11
GO:0051249	regulation of lymphocyte activation	1.87392e-09	434	PRDX2|SOS1|BAD|MALT1|RIF1|ATP11C|ATM|GPAM|PTPN11|CYLD|SART1|PRELID1|ATAD5|MIF|PTPN22|RC3H2|SOD1|DOCK8|CLEC7A|LAX1|IKZF3|RHBDD3|CD160|VNN1|RPS3|TMEM131L|PKN1|LGALS1|PRKCZ|TNFAIP3|IL7|CR1|KLRD1|SMARCD3|GPNMB|PAG1|FYN|PTPRC|CD38|PYCARD|PDCD1LG2|TNFSF14|TLR4|PRKDC|CLNK|VCAM1|CD320|TNFSF13B|IRF4|TESPA1|JUNB|IL15|FGL2|RIPOR2|LYN|MERTK|BTK|CD28|SLAMF8|BANK1|TGFBR2|INPP5D|MAP3K8|NLRP3|DHPS|TSPAN32|NCKAP1…
GO:0006119	oxidative phosphorylation	2.08835e-09	123	ATP5F1D|UQCRC1|NDUFS7|NDUFB10|COX6B1|NDUFA2|UQCC3|NDUFS3|PARK7|ANTKMT|NDUFS6|NDUFB7|UQCRQ|COX7A2|CHCHD2|COX5B|NDUFS8|NDUFB2|COX7C|NDUFA3|CHCHD10|ATP5PF|COX4I1|COX5A|COX8A|ATP5ME|NDUFB11|NDUFB1|NDUFB4|NDUFA1|CYC1|ATP5PO
REAC:R-HSA-9633012	Response of EIF2AK4 (GCN2) to amino acid deficiency	3.348e-09	98	RPS15|RPL36AL|RPLP1|RPL28|RPL18|RPL26L1|FAU|RPL35|RPS9|RPS28|RPL24|RPL14|RPS14|RPL36|RPL29|RPL32|RPS2|RPS5|RPL8|RPS19|RPL12|RPLP2|RPS3|RPL3|RPL11|RPL41|RPS27L|RPL38|RPL37A|RPL13A|RPL13|RPS8|RPS16|RPS11
GO:0019646	aerobic electron transport chain	3.40882e-09	75	UQCRC1|NDUFS7|NDUFB10|COX6B1|NDUFA2|UQCC3|NDUFS3|PARK7|NDUFS6|NDUFB7|UQCRQ|COX7A2|COX5B|NDUFS8|NDUFB2|COX7C|NDUFA3|COX4I1|COX5A|COX8A|NDUFB1|NDUFB4|NDUFA1|CYC1|UQCR10|NDUFS5
GO:0042773	ATP synthesis coupled electron transport	3.74738e-09	82	UQCRC1|NDUFS7|NDUFB10|COX6B1|NDUFA2|UQCC3|NDUFS3|PARK7|NDUFS6|NDUFB7|UQCRQ|COX7A2|CHCHD2|COX5B|NDUFS8|NDUFB2|COX7C|NDUFA3|COX4I1|COX5A|COX8A
GO:0042775	mitochondrial ATP synthesis coupled electron transport	3.74738e-09	82	UQCRC1|NDUFS7|NDUFB10|COX6B1|NDUFA2|UQCC3|NDUFS3|PARK7|NDUFS6|NDUFB7|UQCRQ|COX7A2|CHCHD2|COX5B|NDUFS8|NDUFB2|COX7C|NDUFA3|COX4I1|COX5A|COX8A
GO:0050776	regulation of immune response	6.07132e-09	750	ECSIT|CDC37|PHPT1|SOS1|OTUD4|CPTP|PARK7|NR1H2|MALT1|RIF1|BCAR1|NOP53|STK11|RAB11FIP2|ANKRD17|GPX1|PTPN11|RPS6KA3|CYLD|NFKBIL1|ZDHHC12|HRAS|P2RX7|PQBP1|C9orf72|ATAD5|PTPN22|RC3H2|FER|SPPL2B|CLEC7A|LAX1|TRIM11|CD160|PAK3|RPS19|NLRC3|GFER|RPS3|FYB1|KIT|ALPK1|NAGLU|NAIP|CTSS|PKN1|MATR3|PRKCZ|NECTIN2|TXK|TLR1|TNFAIP3|CD226|NLRC4|CR1|KLRD1|PIK3AP1|FYN|ADCY7|RABGEF1|PTPRC|CD38|SERPINB9|PYCARD|TLR4|PRKDC…
REAC:R-HSA-72613	Eukaryotic Translation Initiation	6.38938e-09	116	RPS15|EIF3G|RPL36AL|RPLP1|RPL28|RPL18|RPL26L1|FAU|RPL35|RPS9|RPS28|RPL24|RPL14|RPS14|RPL36|RPL29|EIF3K|RPL32|RPS2|RPS5|RPL8|RPS19|RPL12|RPLP2|RPS3|RPL3|RPL11|RPL41|RPS27L|RPL38|RPL37A|RPL13A|RPL13|RPS8|EIF4A1|RPS16|RPS11
REAC:R-HSA-72737	Cap-dependent Translation Initiation	6.38938e-09	116	RPS15|EIF3G|RPL36AL|RPLP1|RPL28|RPL18|RPL26L1|FAU|RPL35|RPS9|RPS28|RPL24|RPL14|RPS14|RPL36|RPL29|EIF3K|RPL32|RPS2|RPS5|RPL8|RPS19|RPL12|RPLP2|RPS3|RPL3|RPL11|RPL41|RPS27L|RPL38|RPL37A|RPL13A|RPL13|RPS8|EIF4A1|RPS16|RPS11
GO:0002768	immune response-regulating cell surface receptor signaling pathway	8.75606e-09	287	ECSIT|PHPT1|SOS1|MALT1|BCAR1|STK11|RAB11FIP2|CYLD|HRAS|PTPN22|RC3H2|FER|CLEC7A|LAX1|CD160|PAK3|RPS3|FYB1|KIT|NAGLU|NECTIN2|TXK|TLR1|TNFAIP3|CD226|CR1|KLRD1|PIK3AP1|FYN|RABGEF1|PTPRC|CD38|TLR4|KLHL6|PRKCB|TESPA1|BTLA|RFTN1|RAB29|BTN3A1|STAP1|LYN|MAPK10|BTK|CD28|LCP2|THEMIS|ITK|BANK1|INPP5D|CD200R1|LPXN|SCIMP|CD3G|TLR6|NCKAP1L|TLR2|BTN3A3|TNIP3|NFATC2|PRKCQ|FCN1|NOD2|PLCL2|ITGAM|FCMR|FPR3|PELI1|CMK…
REAC:R-HSA-168273	Influenza Viral RNA Transcription and Replication	1.08388e-08	129	POLR2E|RPS15|GTF2F1|RPL36AL|POLR2I|POLR2L|RPLP1|RPL28|RPL18|RPL26L1|FAU|RPL35|RPS9|RPS28|RPL24|RPL14|RPS14|RPL36|POLR2J|RPL29|RPL32|RPS2|RPS5|RPL8|RPS19|RPL12|RPLP2|RPS3|RPL3|RPL11|RPL41|RPS27L|RPL38|RPL37A|RPL13A|RPL13|RPS8|RPS16|RPS11
REAC:R-HSA-72312	rRNA processing	1.10324e-08	195	WDR18|RPS15|RPL36AL|NHP2|TSR3|RPLP1|RPL28|RPL18|RPL26L1|FAU|HSD17B10|DDX47|BUD23|RPL35|RPS9|RPS28|RPL24|RPL14|RPS14|TBL3|EXOSC5|MRM3|RPL36|EXOSC4|UTP20|RRP9|RPL29|RPL32|RPS2|RPS5|RPL8|NOC4L|RPS19|RPL12|TRMT112|RPLP2|RPS3|RPL3|RPL11|RPL41|RPS27L|RPL38|RPL37A|RPL13A|RPL13|RPS8|BOP1|RRP1|RPS16|RPS11
REAC:R-HSA-2408522	Selenoamino acid metabolism	1.31339e-08	113	RPS15|RPL36AL|EEFSEC|RPLP1|RPL28|RPL18|RPL26L1|FAU|RPL35|RPS9|RPS28|RPL24|RPL14|RPS14|RPL36|RPL29|RPL32|RPS2|RPS5|RPL8|RPS19|RPL12|RPLP2|RPS3|RPL3|RPL11|RPL41|RPS27L|TXNRD1|RPL38|RPL37A|RPL13A|RPL13|RPS8|RPS16|RPS11
GO:0009617	response to bacterium	1.34384e-08	499	PRDX2|CEP192|MALT1|WDR83|ABCD2|ROMO1|FAU|ANKRD17|GPX1|RPS6KA3|NFKBIL1|ABCA1|LYST|P2RX7|SIGIRR|MIF|PTPN22|FER|TBXA2R|IKZF3|CD160|RPS19|GFER|TAB3|NAGLU|NAIP|CA5B|PTGER4|IL10RA|TLR1|TNFAIP3|CHD7|ANG|NLRC4|SHARPIN|GSDMD|NFKBIB|RPL13A|PYCARD|PDCD1LG2|CSF2RB|TLR4|TSPO|VCAM1|KLHL6|SLC9A9|RAB29|STAP1|MPEG1|LYN|BTK|NOTCH2|GFI1|NUGGC|SLAMF8|RNF213|JCHAIN|BANK1|PRKCA|TMEM255A|SCIMP|NLRP3|MRC1|ISG15|CCR4|IL6…
GO:0030098	lymphocyte differentiation	1.63422e-08	377	PRDX2|SOS1|BAD|MALT1|STK11|ATP11C|ATM|CYLD|SART1|KMT2A|PRELID1|PTPN22|RC3H2|SOD1|ZFPM1|DOCK11|IKZF3|VNN1|TMEM131L|KIT|LGALS1|PRKCZ|PTGER4|LEPR|CHD7|STAT4|IL7|RORA|CR1|SMARCD3|PTPRC|JAG2|PRKDC|VCAM1|TNFSF13B|IRF4|TESPA1|JUNB|IL15|FGL2|MERTK|IL18R1|EOMES|BTK|NOTCH2|CD28|THEMIS|SLAMF8|ITK|IKZF1|TGFBR2|INPP5D|SLAMF6|NLRP3|ITGB1|TSHR|CD3G|IL6R|NCKAP1L|POU2AF1|CCR2|IL10|GPR18|PRR7|CD80|HDAC9|DOCK2|TNFS…
REAC:R-HSA-9711097	Cellular response to starvation	2.11299e-08	149	RPS15|RPL36AL|LAMTOR2|FNIP2|RPLP1|RPL28|LAMTOR4|RPL18|RPL26L1|FAU|MLST8|NPRL3|RPL35|NPRL2|RPS9|RPS28|RPL24|RPL14|RPS14|RPL36|ATP6V0B|RPL29|RPL32|RPS2|RPS5|RPL8|KPTN|RPS19|RPL12|RPLP2|RPS3|RPL3|RPL11|RPL41|RPS27L|RPL38|RPL37A|RPL13A|RPL13|RPS8|RPS16|RPS11
REAC:R-HSA-8868773	rRNA processing in the nucleus and cytosol	2.31036e-08	186	WDR18|RPS15|RPL36AL|NHP2|TSR3|RPLP1|RPL28|RPL18|RPL26L1|FAU|DDX47|BUD23|RPL35|RPS9|RPS28|RPL24|RPL14|RPS14|TBL3|EXOSC5|RPL36|EXOSC4|UTP20|RRP9|RPL29|RPL32|RPS2|RPS5|RPL8|NOC4L|RPS19|RPL12|TRMT112|RPLP2|RPS3|RPL3|RPL11|RPL41|RPS27L|RPL38|RPL37A|RPL13A|RPL13|RPS8|BOP1|RRP1|RPS16|RPS11
GO:0006954	inflammatory response	2.47973e-08	689	PRDX2|CPTP|PARK7|PRDX5|WDR83|ABCD2|RICTOR|ATM|GPX1|CYLD|ZDHHC12|TIMP1|CUEDC2|P2RX7|SIGIRR|MYLK3|MIF|PTPN22|SOD1|TBXA2R|CLEC7A|RHBDD3|TRIM11|SCN11A|RPS19|NLRC3|VNN1|KIT|NAGLU|NAIP|LGALS1|PRKCZ|PTGER4|DNASE1|IL10RA|TLR1|METRNL|TNFAIP3|MSMP|RORA|NLRC4|SHARPIN|GSDMD|PIK3AP1|NFKBIB|PIK3CG|SCN9A|NR3C1|FYN|ADCY7|RABGEF1|PTPRC|ETS1|PYCARD|ZEB2|TLR4|F12|VCAM1|CNTF|ADGRE2|LRRK2|TRADD|ZNF580|CYBB|LARGE1|IL1…
GO:0046651	lymphocyte proliferation	3.95233e-08	254	PRDX2|SOS1|MALT1|ATM|GPAM|P2RX7|ATAD5|MIF|PTPN22|RC3H2|DOCK8|IKZF3|CD151|RPS3|TMEM131L|IMPDH2|PKN1|IL7|CR1|PIK3CG|GPNMB|FYN|PTPRC|CD38|PYCARD|PDCD1LG2|TNFSF14|TLR4|VCAM1|CD320|TNFSF13B|IL15|RIPOR2|BTN3A1|LYN|BTK|CD28|TGFBR2|INPP5D|DHPS|TSPAN32|NCKAP1L|CCR2|IL10|CD180|CD80|NFATC2|DOCK2|PRKCQ|CD274|TNFSF8|PLCL2|CD209|CRTAM|VSIG4|ANXA1|PELI1|RASSF5|SLAMF1|SPN|TACR1|IL7R|MNDA|PRLR|FCGR2B|NFKBIZ|CD86|…
GO:0002252	immune effector process	3.9743e-08	509	PRDX2|STXBP2|MALT1|RIF1|CBL|ANKRD17|KMT2A|LYST|CUEDC2|P2RX7|ATAD5|MIF|PTPN22|RC3H2|FER|TUBB4B|ZFPM1|CLEC7A|DOCK11|SCN11A|CD160|RPS19|GFER|KIT|PKN1|LGALS1|PRKCZ|PTGER4|DNASE1|NECTIN2|CD226|STAT4|RORA|CR1|KLRD1|PIK3CG|FYN|RABGEF1|PTPRC|SERPINB9|PYCARD|CSF2RB|TLR4|CLNK|IRF4|ADGRE2|SLAMF7|TRPM4|RFTN1|IRF7|JUNB|FGL2|SUCNR1|STAP1|LYN|IL18R1|TLR8|EOMES|BTK|NOTCH2|CD84|CD28|APBB1IP|SLAMF8|INPP5D|MILR1|SL…
REAC:R-HSA-611105	Respiratory electron transport	4.38781e-08	93	UQCRC1|NDUFS7|NDUFB10|ECSIT|COX6B1|NDUFA2|NDUFS3|NDUFS6|NDUFB7|UQCRQ|COX5B|NDUFAF3|NDUFS8|NDUFB2|COX7C|NDUFA3|COX4I1|SCO2|COX5A|COX8A|NDUFB11|NDUFB1|NDUFB4|NDUFA1|CYC1|UQCR10|NDUFS5|SURF1
REAC:R-HSA-927802	Nonsense-Mediated Decay (NMD)	4.79937e-08	112	RPS15|RPL36AL|RPLP1|RPL28|RPL18|SMG1|RPL26L1|FAU|RPL35|RPS9|RPS28|RPL24|RPL14|RPS14|RPL36|RPL29|RPL32|RPS2|RPS5|RPL8|RPS19|RPL12|RPLP2|RPS3|RPL3|RPL11|RPL41|RPS27L|RPL38|RPL37A|RPL13A|RPL13|RPS8|RPS16|RPS11
REAC:R-HSA-975957	Nonsense Mediated Decay (NMD) enhanced by the Exon Junction Complex (EJC)	4.79937e-08	112	RPS15|RPL36AL|RPLP1|RPL28|RPL18|SMG1|RPL26L1|FAU|RPL35|RPS9|RPS28|RPL24|RPL14|RPS14|RPL36|RPL29|RPL32|RPS2|RPS5|RPL8|RPS19|RPL12|RPLP2|RPS3|RPL3|RPL11|RPL41|RPS27L|RPL38|RPL37A|RPL13A|RPL13|RPS8|RPS16|RPS11
GO:0022904	respiratory electron transport chain	5.50338e-08	103	UQCRC1|NDUFS7|NDUFB10|COX6B1|NDUFA2|UQCC3|NDUFS3|PARK7|NDUFS6|NDUFB7|UQCRQ|COX7A2|CHCHD2|COX5B|NDUFS8|NDUFB2|COX7C|NDUFA3|COX4I1|SCO2|COX5A|COX8A
GO:0050778	positive regulation of immune response	6.02214e-08	607	ECSIT|PHPT1|SOS1|OTUD4|CPTP|PARK7|MALT1|RIF1|BCAR1|NOP53|STK11|RAB11FIP2|ANKRD17|RPS6KA3|CYLD|NFKBIL1|ZDHHC12|HRAS|P2RX7|PQBP1|ATAD5|PTPN22|RC3H2|CLEC7A|LAX1|TRIM11|CD160|PAK3|RPS19|NLRC3|RPS3|FYB1|ALPK1|NAGLU|NAIP|CTSS|MATR3|PRKCZ|NECTIN2|TXK|TLR1|TNFAIP3|CD226|NLRC4|CR1|KLRD1|PIK3AP1|FYN|RABGEF1|PTPRC|CD38|PYCARD|TLR4|PRKDC|CLNK|KLHL6|PRKCB|TNFSF13B|IRF4|TESPA1|RFTN1|RAB29|IRF7|IL15|BTN3A1|STAP…
GO:0002429	immune response-activating cell surface receptor signaling pathway	6.3272e-08	266	ECSIT|PHPT1|SOS1|MALT1|BCAR1|STK11|RAB11FIP2|CYLD|HRAS|PTPN22|RC3H2|CLEC7A|LAX1|CD160|PAK3|RPS3|FYB1|NAGLU|NECTIN2|TXK|TLR1|TNFAIP3|CD226|CR1|KLRD1|PIK3AP1|FYN|RABGEF1|PTPRC|CD38|TLR4|KLHL6|PRKCB|TESPA1|RFTN1|RAB29|BTN3A1|STAP1|LYN|BTK|CD28|LCP2|THEMIS|ITK|BANK1|INPP5D|LPXN|SCIMP|CD3G|TLR6|NCKAP1L|TLR2|BTN3A3|TNIP3|NFATC2|FCN1|NOD2|PLCL2|ITGAM|FCMR|FPR3|PELI1|CMKLR1|CYBA|PLCG2|CD8A|C3|TRAT1|THEMI…
GO:0002366	leukocyte activation involved in immune response	6.72306e-08	249	STXBP2|MALT1|RIF1|CBL|KMT2A|ATAD5|RC3H2|FER|ZFPM1|DOCK11|SCN11A|CD160|KIT|LGALS1|PRKCZ|PTGER4|DNASE1|STAT4|RORA|CR1|PIK3CG|RABGEF1|PTPRC|PYCARD|TLR4|CLNK|IRF4|ADGRE2|JUNB|FGL2|SUCNR1|LYN|IL18R1|EOMES|BTK|NOTCH2|CD84|CD28|APBB1IP|MILR1|SLAMF6|NLRP3|IL6R|NCKAP1L|POU2AF1|PTAFR|CCR2|IL10|CD180|CD80|CD244|DOCK2|TNF|PLCL2|ITGAM|APLF|DOCK10|ANXA1|SLAMF1|LY9|SPN|IRF8|ITM2A|PLCG2|S100A13|FCGR2B|PTGDR|NFKB…
REAC:R-HSA-9010553	Regulation of expression of SLITs and ROBOs	8.36099e-08	161	RPS15|UBB|ELOB|RPL36AL|PSMB6|RPLP1|RPL28|RPL18|RPL26L1|FAU|RPL35|RPS9|RPS28|PSMC3|RPL24|RPL14|RPS14|RPL36|LHX4|PSMC5|RPL29|RPL32|RPS2|RPS5|RPL8|PSMA2|RPS19|RPL12|RPLP2|RPS3|RPL3|SEM1|RPL11|RPL41|RPS27L|RPL38|RPL37A|RPL13A|PSMB3|RPL13|RPS8|RPS16|RPS11
GO:0070661	leukocyte proliferation	1.13801e-07	290	PRDX2|SOS1|MALT1|ATM|GPAM|P2RX7|ATAD5|MIF|PTPN22|RC3H2|DOCK8|IKZF3|CD151|RPS3|TMEM131L|IMPDH2|KIT|PKN1|TNFAIP3|IL7|CR1|PIK3CG|GPNMB|FYN|PTPRC|CD38|PYCARD|PDCD1LG2|TNFSF14|CSF2RB|TLR4|VCAM1|CD320|TNFSF13B|JUNB|IL15|RIPOR2|BTN3A1|LYN|BTK|CD28|TGFBR2|INPP5D|DHPS|TSPAN32|NCKAP1L|CCR2|IL10|CD180|CD80|NFATC2|DOCK2|PRKCQ|CD274|TNFSF8|PLCL2|CD209|CRTAM|VSIG4|ANXA1|PELI1|RASSF5|SLAMF1|SPN|TACR1|IL7R|MNDA|…
REAC:R-HSA-1428517	The citric acid (TCA) cycle and respiratory electron transport	1.13934e-07	160	ATP5F1D|UQCRC1|NDUFS7|NDUFB10|ECSIT|BSG|COX6B1|NDUFA2|NDUFS3|NDUFS6|NDUFB7|GSTZ1|UQCRQ|COX5B|NDUFAF3|NDUFS8|NDUFB2|COX7C|NDUFA3|ATP5PF|COX4I1|SCO2|COX5A|COX8A|ATP5ME|NDUFB11|ATP5MC2|NDUFB1|ATP5MC1|NDUFB4|NDUFA1|CYC1|ATP5PO|UQCR10|NDUFS5|SURF1|TRAP1|ATP5PD|COX6A1|PDP1|ETFB|ATP5F1E|ATP5MF
GO:0007005	mitochondrion organization	1.48805e-07	464	FBXW7|ATP5F1D|ALKBH7|NDUFS7|NDUFB10|ECSIT|HIGD2A|CDC37|NDUFA2|ATG4D|UQCC3|NDUFS3|BAD|ATP5IF1|PARK7|ZNF205|TIMM13|MICOS13|NDUFB7|COA8|FIS1|FKBP8|SDHAF1|LMNA|FAM162A|BBC3|ROMO1|SIVA1|COX7A2|CHCHD2|COX17|HSD17B10|GPX1|VPS13A|NDUFAF3|NDUFS8|OGT|NDUFB2|INF2|LONP1|NDUFA3|CHCHD10|PRELID1|SCO2|TOMM40|TIMM10|ENDOG|P2RX7
GO:0002263	cell activation involved in immune response	1.74517e-07	253	STXBP2|MALT1|RIF1|CBL|KMT2A|ATAD5|RC3H2|FER|ZFPM1|DOCK11|SCN11A|CD160|KIT|LGALS1|PRKCZ|PTGER4|DNASE1|STAT4|RORA|CR1|PIK3CG|RABGEF1|PTPRC|PYCARD|TLR4|CLNK|IRF4|ADGRE2|JUNB|FGL2|SUCNR1|LYN|IL18R1|EOMES|BTK|NOTCH2|CD84|CD28|APBB1IP|MILR1|SLAMF6|NLRP3|IL6R|NCKAP1L|POU2AF1|PTAFR|CCR2|IL10|CD180|CD80|CD244|DOCK2|TNF|PLCL2|ITGAM|APLF|DOCK10|ANXA1|SLAMF1|LY9|SPN|IRF8|ITM2A|PLCG2|S100A13|FCGR2B|PTGDR|NFKB…
REAC:R-HSA-6791226	Major pathway of rRNA processing in the nucleolus and cytosol	1.77051e-07	177	WDR18|RPS15|RPL36AL|RPLP1|RPL28|RPL18|RPL26L1|FAU|DDX47|BUD23|RPL35|RPS9|RPS28|RPL24|RPL14|RPS14|TBL3|EXOSC5|RPL36|EXOSC4|UTP20|RRP9|RPL29|RPL32|RPS2|RPS5|RPL8|NOC4L|RPS19|RPL12|RPLP2|RPS3|RPL3|RPL11|RPL41|RPS27L|RPL38|RPL37A|RPL13A|RPL13|RPS8|BOP1|RRP1|RPS16|RPS11
GO:0032943	mononuclear cell proliferation	1.80844e-07	260	PRDX2|SOS1|MALT1|ATM|GPAM|P2RX7|ATAD5|MIF|PTPN22|RC3H2|DOCK8|IKZF3|CD151|RPS3|TMEM131L|IMPDH2|PKN1|IL7|CR1|PIK3CG|GPNMB|FYN|PTPRC|CD38|PYCARD|PDCD1LG2|TNFSF14|TLR4|VCAM1|CD320|TNFSF13B|IL15|RIPOR2|BTN3A1|LYN|BTK|CD28|TGFBR2|INPP5D|DHPS|TSPAN32|NCKAP1L|CCR2|IL10|CD180|CD80|NFATC2|DOCK2|PRKCQ|CD274|TNFSF8|PLCL2|CD209|CRTAM|VSIG4|ANXA1|PELI1|RASSF5|SLAMF1|SPN|TACR1|IL7R|MNDA|PRLR|FCGR2B|NFKBIZ|CD86|…
REAC:R-HSA-5389840	Mitochondrial translation elongation	2.88265e-07	85	MRPL54|MRPL34|MRPS34|AURKAIP1|MRPL52|MRPL28|MRPL4|GADD45GIP1|MRPL57|MRPS11|MRPL22|MRPL55|MRPL41|TUFM|MRPL12|MRPL20|MRPL24|MRPL27|MRPS12|MRPL23|MRPL40|MRPS26|MRPS15|MRPL58|MRPL14
GO:0050863	regulation of T cell activation	3.75844e-07	321	PRDX2|SOS1|BAD|MALT1|GPAM|PTPN11|CYLD|SART1|PRELID1|PTPN22|RC3H2|SOD1|DOCK8|LAX1|CD160|VNN1|RPS3|TMEM131L|LGALS1|PRKCZ|IL7|CR1|SMARCD3|GPNMB|PAG1|FYN|PTPRC|PYCARD|PDCD1LG2|TNFSF14|VCAM1|TNFSF13B|IRF4|TESPA1|JUNB|IL15|FGL2|RIPOR2|LYN|CD28|TGFBR2|MAP3K8|NLRP3|DHPS|TSPAN32|NCKAP1L|CCR2|IL10|CD80|PRKCQ|CD274|TNFSF8|NOD2|CD209|CRTAM|VSIG4|ANXA1|PELI1|PRDM1|SLAMF1|SPN|ICOS|CAMK4|EFNB2|TIGIT|IL7R|NFKBIZ…
GO:0001819	positive regulation of cytokine production	4.05919e-07	419	AGPAT2|BSG|PARK7|MALT1|PTPN11|HRAS|P2RX7|PQBP1|MIF|PTPN22|SOD1|HSPB1|ZFPM1|CLEC7A|CD160|RPS3|KIT|NAIP|ARFGEF2|PRKCZ|PTGER4|ZBTB20|TXK|TLR1|CD226|IL7|RORA|NLRC4|GSDMD|PIK3CG|PTPRC|SORL1|PYCARD|TLR4|CLNK|IRF4|LRRK2|BRCA1|RFTN1|ZNF580|CYBB|IRF7|IL15|BTN3A1|IL18R1|TLR8|BTK|CD84|CD28|UCN|CD200|ITK|SLAMF6|SCIMP|NLRP3|ISG15|HSPA1A|IL6R|TLR6|POU2AF1|PTAFR|TLR2|CCR2|IL10|TLR7|CD80|HEG1|CD244|TNF|PRKCQ|CD2…
REAC:R-HSA-168255	Influenza Infection	6.11851e-07	147	POLR2E|RPS15|GTF2F1|RPL36AL|POLR2I|POLR2L|RPLP1|RPL28|RPL18|RPL26L1|FAU|RPL35|RPS9|RPS28|RPL24|RPL14|RPS14|RPL36|POLR2J|RPL29|RPL32|RPS2|RPS5|RPL8|RPS19|RPL12|RPLP2|RPS3|RPL3|RPL11|RPL41|RPS27L|RPL38|RPL37A|RPL13A|RPL13|RPS8|RPS16|RPS11|RPL27A|POLR2F|RPL18A|SLC25A6|ISG15|HSPA1A
GO:0015986	proton motive force-driven ATP synthesis	6.30916e-07	62	ATP5F1D|NDUFS7|NDUFB10|NDUFA2|NDUFS3|ANTKMT|NDUFS6|NDUFB7|NDUFS8|NDUFB2|NDUFA3|ATP5PF|ATP5ME|NDUFB11|ATP5MC2|NDUFB1|ATP5MC1|NDUFB4|NDUFA1|ATP5PO
GO:0050851	antigen receptor-mediated signaling pathway	6.68416e-07	169	PHPT1|SOS1|MALT1|BCAR1|STK11|CYLD|HRAS|PTPN22|RC3H2|LAX1|CD160|RPS3|FYB1|NECTIN2|TXK|CD226|FYN|PTPRC|CD38|KLHL6|PRKCB|TESPA1|RFTN1|RAB29|BTN3A1|STAP1|LYN|BTK|CD28|LCP2|THEMIS|ITK|BANK1|INPP5D|LPXN|CD3G|NCKAP1L|BTN3A3|NFATC2|PLCL2|FCMR|PLCG2|CD8A|TRAT1|THEMIS2|MNDA|FCGR2B|NFKBIZ|LCK|SH2D1A|PDE4B|UBASH3A|GCSAM|GBP1|MS4A1|CD247|FCRL3|CD3E|ZAP70|CD19|CCR7|ZNF683|CTLA4|GCSAML|CD8B|VTCN1|BMX|CD79A|CD3D
GO:0050867	positive regulation of cell activation	7.66818e-07	322	BAD|MALT1|RIF1|ATP11C|GPAM|PTPN11|CYLD|SART1|ATAD5|MIF|PTPN22|DOCK8|CLEC7A|CD160|VNN1|RPS3|LGALS1|PRKCZ|NECTIN2|CD226|IL7|CR1|SMARCD3|FYN|PTPRC|CD38|PYCARD|PDCD1LG2|TNFSF14|TLR4|PRKDC|VCAM1|CD320|TNFSF13B|TESPA1|LRRK2|IL15|STAP1|LYN|BTK|CD28|TGFBR2|INPP5D|PLEK|MAP3K8|NLRP3|DHPS|TLR6|NCKAP1L|CCR2|IL10|CTSC|CD80|NFATC2|TNF|PRKCQ|CD274|NOD2|CD209|ANXA1|PELI1|SVEP1|SLAMF1|SPN|ICOS|EFNB2|TACR1|IL7R|PR…
GO:0045333	cellular respiration	9.19186e-07	214	ATP5F1D|UQCRC1|NDUFS7|NDUFB10|COX6B1|NDUFA2|UQCC3|NDUFS3|PARK7|ANTKMT|NDUFS6|NDUFB7|NOP53|UQCRQ|COX7A2|CHCHD2|COX5B|NDUFS8|NDUFB2|COX7C|NDUFA3|CHCHD10|PRELID1|MTLN|ATP5PF|COX4I1|SCO2|COX5A|CHCHD5|COX8A
GO:0002764	immune response-regulating signaling pathway	1.37343e-06	435	ECSIT|PHPT1|SOS1|OTUD4|CPTP|MALT1|BCAR1|NOP53|STK11|RAB11FIP2|ANKRD17|RPS6KA3|CYLD|NFKBIL1|ZDHHC12|HRAS|PTPN22|RC3H2|FER|CLEC7A|LAX1|TRIM11|CD160|PAK3|NLRC3|RPS3|FYB1|KIT|ALPK1|NAGLU|NAIP|CTSS|NECTIN2|TXK|TLR1|TNFAIP3|CD226|NLRC4|CR1|KLRD1|PIK3AP1|FYN|RABGEF1|PTPRC|CD38|PYCARD|TLR4|PRKDC|KLHL6|PRKCB|IRF4|TESPA1|BTLA|RFTN1|RAB29|IRF7|BTN3A1|STAP1|LYN|TLR8|MAPK10|BTK|CD28|LCP2|GFI1|THEMIS|ITK|BIRC3…
REAC:R-HSA-5368287	Mitochondrial translation	1.43852e-06	91	MRPL54|MRPL34|MRPS34|AURKAIP1|MRPL52|MRPL28|MRPL4|GADD45GIP1|MRPL57|MRPS11|MRPL22|MRPL55|MRPL41|TUFM|MRPL12|MRPL20|MRPL24|MRPL27|MRPS12|MRPL23|MRPL40|MRPS26|MRPS15|MRPL58|MRPL14
REAC:R-HSA-5368286	Mitochondrial translation initiation	1.72081e-06	85	MRPL54|MRPL34|MRPS34|AURKAIP1|MRPL52|MRPL28|MRPL4|GADD45GIP1|MRPL57|MRPS11|MRPL22|MRPL55|MRPL41|MRPL12|MRPL20|MRPL24|MRPL27|MRPS12|MRPL23|MRPL40|MRPS26|MRPS15|MRPL58|MRPL14
REAC:R-HSA-5419276	Mitochondrial translation termination	1.72081e-06	85	MRPL54|MRPL34|MRPS34|AURKAIP1|MRPL52|MRPL28|MRPL4|GADD45GIP1|MRPL57|MRPS11|MRPL22|MRPL55|MRPL41|MRPL12|MRPL20|MRPL24|MRPL27|MRPS12|MRPL23|MRPL40|MRPS26|MRPS15|MRPL58|MRPL14
GO:1903131	mononuclear cell differentiation	1.74807e-06	420	PRDX2|SOS1|BAD|MALT1|STK11|ATP11C|ATM|CYLD|SART1|KMT2A|PRELID1|PTPN22|RC3H2|SOD1|ZFPM1|DOCK11|IKZF3|VNN1|TMEM131L|KIT|LGALS1|PRKCZ|PTGER4|LEPR|CHD7|STAT4|IL7|RORA|CR1|SMARCD3|PTPRC|JAG2|PRKDC|VCAM1|TNFSF13B|IRF4|TESPA1|IRF7|JUNB|IL15|FGL2|LYN|MERTK|IL18R1|EOMES|BTK|NOTCH2|CD28|THEMIS|SLAMF8|ITK|IKZF1|TGFBR2|INPP5D|SLAMF6|NLRP3|ITGB1|TSHR|CD3G|IL6R|NCKAP1L|POU2AF1|CCR2|IL10|GPR18|PRR7|CD80|HDAC9|D…
GO:0009060	aerobic respiration	2.18965e-06	171	ATP5F1D|UQCRC1|NDUFS7|NDUFB10|COX6B1|NDUFA2|UQCC3|NDUFS3|PARK7|ANTKMT|NDUFS6|NDUFB7|NOP53|UQCRQ|COX7A2|CHCHD2|COX5B|NDUFS8|NDUFB2|COX7C|NDUFA3|CHCHD10|ATP5PF|COX4I1|COX5A|COX8A|ATP5ME|NDUFB11
GO:0009206	purine ribonucleoside triphosphate biosynthetic process	2.23677e-06	92	ATP5F1D|NDUFS7|NDUFB10|NDUFA2|UQCC3|NDUFS3|ANTKMT|NDUFS6|NME3|NDUFB7|NDUFS8|NDUFB2|NDUFA3|ATP5PF|ATP5ME|NDUFB11|ATP5MC2|NME4|NDUFB1|ATP5MC1|NDUFB4|NDUFA1|ATP5PO|IMPDH2
REAC:R-HSA-376176	Signaling by ROBO receptors	2.40804e-06	204	RPS15|UBB|ELOB|SOS1|RPL36AL|PSMB6|RPLP1|RPL28|RPL18|GPC1|RPL26L1|FAU|RPL35|RPS9|RPS28|PSMC3|RPL24|RPL14|RPS14|RPL36|LHX4|PSMC5|RPL29|RPL32|RPS2|RPS5|RPL8|PAK4|PSMA2|PAK3|RPS19|RPL12|RPLP2|RPS3|RPL3|SEM1|RPL11|RPL41|RPS27L|RPL38|RPL37A|RPL13A|PSMB3|RPL13|RPS8|RPS16|RPS11
GO:0002757	immune response-activating signaling pathway	2.54808e-06	415	ECSIT|PHPT1|SOS1|OTUD4|CPTP|MALT1|BCAR1|NOP53|STK11|RAB11FIP2|ANKRD17|RPS6KA3|CYLD|NFKBIL1|ZDHHC12|HRAS|PTPN22|RC3H2|CLEC7A|LAX1|TRIM11|CD160|PAK3|NLRC3|RPS3|FYB1|ALPK1|NAGLU|NAIP|CTSS|NECTIN2|TXK|TLR1|TNFAIP3|CD226|NLRC4|CR1|KLRD1|PIK3AP1|FYN|RABGEF1|PTPRC|CD38|PYCARD|TLR4|PRKDC|KLHL6|PRKCB|IRF4|TESPA1|RFTN1|RAB29|IRF7|BTN3A1|STAP1|LYN|TLR8|BTK|CD28|LCP2|GFI1|THEMIS|ITK|BIRC3|BANK1|INPP5D|LPXN|S…
GO:0002253	activation of immune response	2.83187e-06	463	ECSIT|PHPT1|SOS1|OTUD4|CPTP|MALT1|BCAR1|NOP53|STK11|RAB11FIP2|ANKRD17|RPS6KA3|CYLD|NFKBIL1|ZDHHC12|HRAS|PQBP1|PTPN22|RC3H2|CLEC7A|LAX1|TRIM11|CD160|PAK3|NLRC3|RPS3|FYB1|ALPK1|NAGLU|NAIP|CTSS|MATR3|NECTIN2|TXK|TLR1|TNFAIP3|CD226|NLRC4|CR1|KLRD1|PIK3AP1|FYN|RABGEF1|PTPRC|CD38|PYCARD|TLR4|PRKDC|KLHL6|PRKCB|IRF4|TESPA1|RFTN1|RAB29|IRF7|BTN3A1|STAP1|LYN|TLR8|BTK|CD28|LCP2|GFI1|THEMIS|ITK|BIRC3|BANK1|I…
GO:0009145	purine nucleoside triphosphate biosynthetic process	2.83852e-06	93	ATP5F1D|NDUFS7|NDUFB10|NDUFA2|UQCC3|NDUFS3|ANTKMT|NDUFS6|NME3|NDUFB7|NDUFS8|NDUFB2|NDUFA3|ATP5PF|ATP5ME|NDUFB11|ATP5MC2|NME4|NDUFB1|ATP5MC1|NDUFB4|NDUFA1|ATP5PO|IMPDH2
GO:0002521	leukocyte differentiation	3.67029e-06	543	FBXW7|PRDX2|SOS1|BAD|MALT1|TET2|STK11|ATP11C|ATM|GPR137|CYLD|SART1|KMT2A|PRELID1|RRAS|PTPN22|RC3H2|SOD1|ZFPM1|DOCK11|IKZF3|QKI|VNN1|TMEM131L|KIT|NAGLU|LGALS1|PRKCZ|PTGER4|LEPR|CHD7|STAT4|IL7|RORA|CR1|SMARCD3|GAB3|RASSF2|NR3C1|PTPRC|JAG2|TLR4|PRKDC|VCAM1|TNFSF13B|IRF4|TESPA1|LARGE1|IRF7|JUNB|IL15|FGL2|LYN|MERTK|IL18R1|EOMES|BTK|NOTCH2|CD28|THEMIS|SLAMF8|ITK|IKZF1|TGFBR2|INPP5D|PRKCA|SLAMF6|NLRP3|I…
GO:0042776	proton motive force-driven mitochondrial ATP synthesis	4.10585e-06	57	ATP5F1D|NDUFS7|NDUFB10|NDUFA2|NDUFS3|ANTKMT|NDUFS6|NDUFB7|NDUFS8|NDUFB2|NDUFA3|ATP5PF|ATP5ME|NDUFB11|NDUFB1|NDUFB4|NDUFA1|ATP5PO|NDUFS5|ATP5PD|ATP5F1E|ATP5MF
GO:1903037	regulation of leukocyte cell-cell adhesion	4.11829e-06	315	PRDX2|BAD|MALT1|NFAT5|GPAM|PTPN11|CYLD|SART1|PTPN22|RC3H2|DOCK8|LAX1|CD160|VNN1|RPS3|TMEM131L|LGALS1|PRKCZ|IL7|CR1|SMARCD3|GPNMB|PAG1|FYN|PTPRC|ETS1|PYCARD|PDCD1LG2|TNFSF14|VCAM1|TNFSF13B|TESPA1|IL15|FGL2|RIPOR2|LYN|CD28|TGFBR2|MAP3K8|NLRP3|DHPS|TSPAN32|NCKAP1L|PTAFR|CCR2|IL10|CD80|TNF|PRKCQ|CD274|NOD2|CD209|CRTAM|PPARA|VSIG4|ANXA1|SELE|PELI1|SLAMF1|SPN|ICOS|EFNB2|TIGIT|IL7R|GCNT1|NFKBIZ|CD86|JAK…
GO:0001816	cytokine production	4.38074e-06	663	AGPAT2|BSG|CPTP|PARK7|MALT1|ABCD2|ZBTB33|GPAM|PTPN11|CYLD|NFKBIL1|ZBTB39|HRAS|CUEDC2|P2RX7|PQBP1|SIGIRR|MIF|PTPN22|SOD1|HSPB1|ZFPM1|CLEC7A|QKI|CD160|NLRC3|RPS3|KIT|NAIP|ARFGEF2|PRKCZ|PTGER4|ZBTB20|TXK|TLR1|TNFAIP3|CD226|IL7|RORA|NLRC4|CR1|GSDMD|PIK3CG|GPNMB|ADCY7|RABGEF1|PTPRC|SORL1|PYCARD|PDCD1LG2|TLR4|CLNK|TSPO|IRF4|TRPM4|LRRK2|BRCA1|RFTN1|ZNF580|CYBB|IRF7|IL15|BTN3A1|LYN|MERTK|REL|IL18R1|TLR8|…
GO:0030217	T cell differentiation	4.59407e-06	277	PRDX2|SOS1|BAD|MALT1|STK11|CYLD|SART1|KMT2A|PRELID1|PTPN22|RC3H2|SOD1|ZFPM1|IKZF3|VNN1|TMEM131L|KIT|PRKCZ|PTGER4|LEPR|CHD7|STAT4|IL7|RORA|CR1|SMARCD3|PTPRC|JAG2|PRKDC|IRF4|TESPA1|JUNB|IL15|FGL2|IL18R1|EOMES|CD28|THEMIS|ITK|TGFBR2|SLAMF6|NLRP3|CD3G|IL6R|NCKAP1L|CCR2|GPR18|PRR7|CD80|DOCK2|TNFSF8|CRTAM|ANXA1|PRDM1|LY9|SPN|CAMK4|CD8A|IL7R|NFKBIZ|CD86|JAK3|TNFRSF9|IL2RA|LCK|ZEB1|KLRC1|RUNX3|CD4|IL12RB…
GO:0002696	positive regulation of leukocyte activation	4.6649e-06	308	BAD|MALT1|RIF1|ATP11C|GPAM|PTPN11|CYLD|SART1|ATAD5|MIF|PTPN22|DOCK8|CLEC7A|CD160|VNN1|RPS3|LGALS1|PRKCZ|NECTIN2|CD226|IL7|CR1|SMARCD3|FYN|PTPRC|CD38|PYCARD|PDCD1LG2|TNFSF14|TLR4|PRKDC|VCAM1|CD320|TNFSF13B|TESPA1|LRRK2|IL15|STAP1|LYN|BTK|CD28|TGFBR2|INPP5D|MAP3K8|NLRP3|DHPS|TLR6|NCKAP1L|CCR2|IL10|CTSC|CD80|NFATC2|TNF|PRKCQ|CD274|NOD2|CD209|ANXA1|PELI1|SLAMF1|SPN|ICOS|EFNB2|TACR1|IL7R|PRLR|NFKBIZ|C…
GO:0050670	regulation of lymphocyte proliferation	6.57305e-06	201	SOS1|ATM|GPAM|ATAD5|MIF|PTPN22|IKZF3|RPS3|TMEM131L|PKN1|IL7|CR1|GPNMB|PTPRC|CD38|PYCARD|PDCD1LG2|TLR4|VCAM1|CD320|TNFSF13B|IL15|RIPOR2|LYN|BTK|CD28|TGFBR2|INPP5D|DHPS|TSPAN32|NCKAP1L|CCR2|IL10|CD80|NFATC2|PRKCQ|CD274|TNFSF8|CD209|CRTAM|VSIG4|ANXA1|PELI1|RASSF5|SLAMF1|SPN|TACR1|MNDA|PRLR|FCGR2B|CD86|TNFRSF9|TNFSF18|IL2RA|TFRC|IL12RB1|PLA2G2D|CD40LG|SASH3|XCL1|FCRL3|IDO1|IGF1|GPR183|CD3E|IL6|ZAP70|…
GO:0001817	regulation of cytokine production	6.73548e-06	658	AGPAT2|BSG|CPTP|PARK7|MALT1|ABCD2|ZBTB33|GPAM|PTPN11|CYLD|NFKBIL1|ZBTB39|HRAS|CUEDC2|P2RX7|PQBP1|SIGIRR|MIF|PTPN22|SOD1|HSPB1|ZFPM1|CLEC7A|QKI|CD160|NLRC3|RPS3|KIT|NAIP|ARFGEF2|PRKCZ|PTGER4|ZBTB20|TXK|TLR1|TNFAIP3|CD226|IL7|RORA|NLRC4|CR1|GSDMD|PIK3CG|GPNMB|ADCY7|RABGEF1|PTPRC|SORL1|PYCARD|PDCD1LG2|TLR4|CLNK|TSPO|IRF4|TRPM4|LRRK2|BRCA1|RFTN1|ZNF580|CYBB|IRF7|IL15|BTN3A1|LYN|MERTK|REL|IL18R1|TLR8|…
GO:0007159	leukocyte cell-cell adhesion	7.66613e-06	349	GFUS|PRDX2|BAD|MALT1|NFAT5|GPAM|PTPN11|CYLD|SART1|PTPN22|RC3H2|DOCK8|LAX1|ROCK1|CD160|VNN1|RPS3|TMEM131L|LGALS1|PRKCZ|IL7|CR1|SMARCD3|GPNMB|PAG1|FYN|PTPRC|ETS1|PYCARD|PDCD1LG2|TNFSF14|VCAM1|TNFSF13B|TESPA1|IL15|FGL2|RIPOR2|LYN|CD28|TGFBR2|MAP3K8|NLRP3|ITGB1|DHPS|TSPAN32|NCKAP1L|PTAFR|CCR2|IL10|CD80|TNF|PRKCQ|CD274|NOD2|CD209|CRTAM|PPARA|VSIG4|ANXA1|SELE|PELI1|SLAMF1|SPN|ICOS|EFNB2|TIGIT|IL7R|GCNT…
GO:0002443	leukocyte mediated immunity	7.90616e-06	319	STXBP2|MALT1|RIF1|CBL|LYST|P2RX7|ATAD5|FER|TUBB4B|CLEC7A|SCN11A|CD160|GFER|KIT|PRKCZ|DNASE1|NECTIN2|CD226|CR1|KLRD1|PIK3CG|RABGEF1|PTPRC|SERPINB9|CSF2RB|TLR4|CLNK|ADGRE2|SLAMF7|TRPM4|RFTN1|IRF7|STAP1|LYN|IL18R1|TLR8|BTK|CD84|CD28|INPP5D|MILR1|SLAMF6|SCIMP|NLRP3|IL6R|NCKAP1L|PTAFR|CCR2|IL10|CTSC|BTN3A3|CD80|TNF|NOD2|ITGAM|APLF|CD96|CRTAM|FCMR|IL18RAP|SVEP1|SLAMF1|SPN|SCART1|PLCG2|CD8A|C3|S100A13|I…
GO:0009201	ribonucleoside triphosphate biosynthetic process	8.88442e-06	98	ATP5F1D|NDUFS7|NDUFB10|NDUFA2|UQCC3|NDUFS3|ANTKMT|NDUFS6|NME3|NDUFB7|NDUFS8|NDUFB2|NDUFA3|ATP5PF|ATP5ME|NDUFB11|ATP5MC2|NME4|NDUFB1|ATP5MC1|NDUFB4|NDUFA1|ATP5PO|IMPDH2
GO:0032944	regulation of mononuclear cell proliferation	1.38728e-05	204	SOS1|ATM|GPAM|ATAD5|MIF|PTPN22|IKZF3|RPS3|TMEM131L|PKN1|IL7|CR1|GPNMB|PTPRC|CD38|PYCARD|PDCD1LG2|TLR4|VCAM1|CD320|TNFSF13B|IL15|RIPOR2|LYN|BTK|CD28|TGFBR2|INPP5D|DHPS|TSPAN32|NCKAP1L|CCR2|IL10|CD80|NFATC2|PRKCQ|CD274|TNFSF8|CD209|CRTAM|VSIG4|ANXA1|PELI1|RASSF5|SLAMF1|SPN|TACR1|MNDA|PRLR|FCGR2B|CD86|TNFRSF9|TNFSF18|IL2RA|TFRC|IL12RB1|PLA2G2D|CD40LG|SASH3|XCL1|FCRL3|IDO1|IGF1|GPR183|CD3E|IL6|ZAP70|…
GO:0006412	translation	1.65988e-05	629	ELOF1|MRPL54|RPS15|EIF3G|MRPL34|OAZ1|MRPS34|AURKAIP1|DAPK3|ELOB|MRPL52|RPL36AL|MRPL28|MRPL4|PTCD1|GADD45GIP1|MRPL57|EEFSEC|GMPPB|MRPS11|MRPL22|EEF1D|MRPL55|RPLP1|RPL28|RPL18|RPL26L1|MRPL41|FAU|TUFM|TNRC6B|PYM1|RACK1|RPS6KA3|NSUN5|PTRH1|RPL35|MRPL12|RPS9|RPS28|OGT|AGO3|RPL24|RPL14|MRPL20|RPS14|AGO4|RPL36|MRPL24|DALRD3|APEH|MKNK2|MRPL27|MRPS12|MRPL23|RPL29|EIF3K|RPL32|RPS2|DAPK1|RPS5|RPL8|HSPB1|MRP…
GO:0070663	regulation of leukocyte proliferation	1.859e-05	224	SOS1|ATM|GPAM|ATAD5|MIF|PTPN22|IKZF3|RPS3|TMEM131L|KIT|PKN1|TNFAIP3|IL7|CR1|GPNMB|PTPRC|CD38|PYCARD|PDCD1LG2|CSF2RB|TLR4|VCAM1|CD320|TNFSF13B|IL15|RIPOR2|LYN|BTK|CD28|TGFBR2|INPP5D|DHPS|TSPAN32|NCKAP1L|CCR2|IL10|CD80|NFATC2|PRKCQ|CD274|TNFSF8|CD209|CRTAM|VSIG4|ANXA1|PELI1|RASSF5|SLAMF1|SPN|TACR1|MNDA|PRLR|FCGR2B|CD86|TNFRSF9|TNFSF18|IL2RA|TFRC|IL12RB1|CCL8|PLA2G2D|CD40LG|SASH3|XCL1|IL33|FCRL3|IDO…
GO:0022900	electron transport chain	2.44945e-05	152	UQCRC1|NDUFS7|NDUFB10|GFUS|COX6B1|NDUFA2|UQCC3|NDUFS3|PARK7|NDUFS6|NDUFB7|UQCRQ|COX7A2|CHCHD2|COX5B|NDUFS8|NDUFB2|COX7C|NDUFA3|COX4I1|SCO2|COX5A|COX8A
GO:0009142	nucleoside triphosphate biosynthetic process	2.63769e-05	106	ATP5F1D|NDUFS7|NDUFB10|NDUFA2|UQCC3|NDUFS3|ANTKMT|NDUFS6|NME3|NDUFB7|NDUFS8|NDUFB2|NDUFA3|ATP5PF|ATP5ME|NDUFB11|ATP5MC2|NME4|NDUFB1|ATP5MC1|NDUFB4|NDUFA1|ATP5PO|IMPDH2|NDUFS5|AK1|ATP5PD|NME1|ATP5F1E|ATP5MF
GO:0002683	negative regulation of immune system process	2.65842e-05	429	FBXW7|PRDX2|PHPT1|OTUD4|CPTP|NR1H2|ATM|GPAM|GPX1|GPR137|NFKBIL1|ZDHHC12|CUEDC2|C9orf72|MIF|PTPN22|RC3H2|FER|ZFPM1|LAX1|RHBDD3|TRIM11|QKI|CD160|RPS19|NLRC3|GFER|TMEM131L|PKN1|PTGER4|TNFAIP3|CR1|KLRD1|GPNMB|PAG1|FYN|RABGEF1|PTPRC|SERPINB9|PDCD1LG2|TLR4|PRKDC|CLNK|IRF4|FGL2|RIPOR2|STAP1|LYN|MERTK|BTK|CD84|SLAMF8|CD200|BANK1|INPP5D|MILR1|CD200R1|LPXN|ISG15|TLR6|TSPAN32|NCKAP1L|FSTL3|CCR2|IL10|GPR18|C…
GO:0043043	peptide biosynthetic process	2.76146e-05	652	ELOF1|MRPL54|RPS15|EIF3G|MRPL34|OAZ1|MRPS34|AURKAIP1|DAPK3|ELOB|MRPL52|RPL36AL|MRPL28|MRPL4|PTCD1|GADD45GIP1|MRPL57|EEFSEC|GMPPB|MRPS11|MRPL22|GSS|EEF1D|MRPL55|RPLP1|RPL28|RPL18|RPL26L1|MRPL41|FAU|TUFM|TNRC6B|PYM1|RACK1|RPS6KA3|NSUN5|PTRH1|RPL35|MRPL12|RPS9|RPS28|OGT|AGO3|RPL24|RPL14|MRPL20|RPS14|AGO4|RPL36|MRPL24|DALRD3|APEH|MKNK2|MRPL27|MRPS12|MRPL23|RPL29|EIF3K|RPL32|RPS2|DAPK1|HAGH|RPS5|RPL8|…
GO:0042100	B cell proliferation	2.79284e-05	79	ATM|ATAD5|MIF|IKZF3|PKN1|IL7|PTPRC|CD38|TLR4|CD320|TNFSF13B|LYN|BTK|INPP5D|NCKAP1L|IL10|CD180|NFATC2|PLCL2|PELI1|IL7R|MNDA|PRLR|FCGR2B|NFKBIZ|CR2|TFRC|MS4A1|CD40LG|SASH3|FCRL3|GPR183|CD19|TNFRSF13C|CTLA4|CDKN2A|RASGRP1|CD79A
GO:0002181	cytoplasmic translation	3.07201e-05	152	RPS15|EIF3G|EEF1D|RPLP1|RPL28|RPL18|RPL26L1|FAU|RACK1|RPL35|RPS9|RPS28|RPL24|RPL14|RPS14|RPL36|RPL29|EIF3K|RPL32|RPS2|RPS5|RPL8|RPS19|RPL12|RPLP2|RPS3|RPL3|RPL11|RPL41|RPL38|RPL37A|RPL13A|RPL13|RPS8|EIF4A1|RPS16|RPS11
GO:0006754	ATP biosynthetic process	3.08361e-05	83	ATP5F1D|NDUFS7|NDUFB10|NDUFA2|UQCC3|NDUFS3|ANTKMT|NDUFS6|NDUFB7|NDUFS8|NDUFB2|NDUFA3|ATP5PF|ATP5ME|NDUFB11|ATP5MC2|NDUFB1|ATP5MC1|NDUFB4|NDUFA1|ATP5PO
GO:0046631	alpha-beta T cell activation	3.54073e-05	153	MALT1|KMT2A|PTPN22|RC3H2|ZFPM1|CD160|PRKCZ|PTGER4|STAT4|RORA|PTPRC|IRF4|JUNB|IL15|IL18R1|EOMES|CD28|ITK|TGFBR2|SLAMF6|NLRP3|CD3G|IL6R|NCKAP1L|CCR2|GPR18|PRR7|CD80|WDFY4|DOCK2|PRKCQ|CD274|TNFSF8|CRTAM|ANXA1|PRDM1|LY9|SPN|NFKBIZ|CD86|JAK3|IL2RA|RUNX3|IL12RB1|PLA2G2D|SASH3|XCL1|RORC|BCL11B|CD247|GPR183|TBX21|CD3E|IL6|ZAP70|ZNF683
GO:0009144	purine nucleoside triphosphate metabolic process	3.77022e-05	215	ATP5F1D|NDUFS7|NDUFB10|SIRT6|JMJD8|NDUFA2|UQCC3|NDUFS3|BAD|ATP5IF1|ANTKMT|NDUFS6|NME3|NDUFB7|FIS1|GUK1|MLST8|NDUFS8|OGT|NDUFB2|NDUFA3|ATP5PF|P2RX7|ATP5ME|NDUFB11|ATP5MC2|NME4|ITPA|NDUFB1|ATP5MC1|NDUFB4|NDUFA1|ENO3|ATP5PO|GALK1|IMPDH2|PFKL|ZBTB20|NDUFS5
GO:1903039	positive regulation of leukocyte cell-cell adhesion	3.78743e-05	235	BAD|MALT1|NFAT5|GPAM|PTPN11|CYLD|SART1|PTPN22|DOCK8|CD160|VNN1|RPS3|LGALS1|PRKCZ|IL7|CR1|SMARCD3|FYN|PTPRC|ETS1|PYCARD|PDCD1LG2|TNFSF14|VCAM1|TNFSF13B|TESPA1|IL15|LYN|CD28|TGFBR2|MAP3K8|NLRP3|DHPS|NCKAP1L|PTAFR|CCR2|CD80|TNF|PRKCQ|CD274|NOD2|CD209|ANXA1|SELE|SLAMF1|SPN|ICOS|EFNB2|IL7R|GCNT1|NFKBIZ|CD86|IL2RA|LCK|DPP4|RUNX3|CD4|TFRC|IL12RB1|RAG1|CD40LG|SASH3|ITGA4|XCL1|CD5|IGF1|CD3E|IL6|ZAP70|CCR7…
GO:0032609	type II interferon production	4.54546e-05	95	HRAS|PTPN22|ZFPM1|CLEC7A|CD160|TXK|CD226|CR1|PYCARD|PDCD1LG2|TLR4|BTN3A1|IL18R1|TLR8|SLAMF6|ISG15|CCR2|IL10|TLR7|CD244|TNF|CD274|NOD2|CD96|CRTAM|SLAMF1|SPN|IRF8|PDE4B|IL12RB1|SASH3|XCL1|IL33|IL1RL1|IL1R1|CD2|CD3E|CCR7|ZNF683|LTA|RASGRP1|PGLYRP2|IL12RB2
GO:0009205	purine ribonucleoside triphosphate metabolic process	4.72065e-05	208	ATP5F1D|NDUFS7|NDUFB10|SIRT6|JMJD8|NDUFA2|UQCC3|NDUFS3|BAD|ATP5IF1|ANTKMT|NDUFS6|NME3|NDUFB7|FIS1|MLST8|NDUFS8|OGT|NDUFB2|NDUFA3|ATP5PF|P2RX7|ATP5ME|NDUFB11|ATP5MC2|NME4|ITPA|NDUFB1|ATP5MC1|NDUFB4|NDUFA1|ENO3|ATP5PO|GALK1|IMPDH2|PFKL|ZBTB20|NDUFS5
GO:0002697	regulation of immune effector process	5.94466e-05	313	STXBP2|MALT1|RIF1|ANKRD17|CUEDC2|P2RX7|ATAD5|MIF|PTPN22|RC3H2|FER|CLEC7A|CD160|RPS19|GFER|KIT|PKN1|PRKCZ|DNASE1|NECTIN2|CD226|CR1|KLRD1|RABGEF1|PTPRC|SERPINB9|PYCARD|TLR4|CLNK|IRF4|ADGRE2|TRPM4|JUNB|FGL2|STAP1|LYN|IL18R1|BTK|CD84|CD28|SLAMF8|SLAMF6|SCIMP|NLRP3|NCKAP1L|PTAFR|CCR2|IL10|TLR7|CD80|CD244|TNF|FCN1|NOD2|ITGAM|APLF|CD96|CRTAM|VSIG4|IL18RAP|ANXA1|CFH|SVEP1|SLAMF1|SPN|PLCG2|ANGPT1|C3|IL7R|…
GO:0050671	positive regulation of lymphocyte proliferation	6.56439e-05	122	GPAM|ATAD5|MIF|PTPN22|RPS3|IL7|PTPRC|CD38|PYCARD|PDCD1LG2|TLR4|VCAM1|CD320|TNFSF13B|IL15|BTK|CD28|TGFBR2|DHPS|NCKAP1L|CCR2|CD80|NFATC2|PRKCQ|CD274|CD209|ANXA1|PELI1|SLAMF1|SPN|TACR1|PRLR|CD86|IL2RA|TFRC|IL12RB1|CD40LG|SASH3|XCL1|FCRL3|IGF1|GPR183|CD3E|IL6|ZAP70|TNFRSF13C|IGFBP2|CD6
GO:0050853	B cell receptor signaling pathway	7.53201e-05	60	SOS1|BCAR1|PTPN22|PTPRC|CD38|KLHL6|PRKCB|RFTN1|STAP1|LYN|BTK|ITK|BANK1|LPXN|NCKAP1L|NFATC2|PLCL2|FCMR|PLCG2|MNDA|FCGR2B|NFKBIZ|LCK|GCSAM|MS4A1|FCRL3|CD19|CTLA4|GCSAML|BMX|CD79A
GO:0002460	adaptive immune response based on somatic recombination of immune receptors built from immunoglobulin superfamily domains	7.69509e-05	259	MALT1|RIF1|HRAS|P2RX7|ATAD5|RC3H2|CLEC7A|PKN1|PRKCZ|NECTIN2|TNFAIP3|CD226|STAT4|RORA|CR1|KLRD1|PTPRC|CSF2RB|TLR4|KLHL6|TNFSF13B|IRF4|TRPM4|RFTN1|IRF7|JUNB|IL18R1|TLR8|BACH2|BTK|CD28|INPP5D|SLAMF6|NLRP3|IL6R|NCKAP1L|CCR2|IL10|CTSC|BTN3A3|CD80|TNF|PRKCQ|CD274|NOD2|APLF|FCMR|ANXA1|SVEP1|SLAMF1|LY9|SPN|SCART1|CD8A|C3|IL7R|FCGR2B|NFKBIZ|JAK3|CR2|KLRC1|CD4|TFRC|IL12RB1|C1S|CD40LG|SASH3|XCL1|NCR3LG1|IL3…
GO:0006935	chemotaxis	7.85548e-05	386	BSG|BCAR1|SEMA6B|PPIB|HRAS|LYST|PIKFYVE|MIF|FER|HSPB1|GAB1|RPS19|KIT|CORO1B|MSMP|RAC3|CCR8|ARHGEF16|PIK3CG|DOCK4|GPNMB|SEMA3F|TMEM102|RPL13A|PGF|TNFSF14|ENPP2|VCAM1|ADGRE2|CMTM1|TRPM4|ZNF580|RIPOR2|SUCNR1|STAP1|LYN|SEMA3B|PDGFRA|SLAMF8|BIN2|CCR4|IL6R|NCKAP1L|PTAFR|CCR2|IL10|GPR18|CAMK1D|CYP7B1|DOCK2|PRKCQ|NOD2|RAB13|FPR3|ANXA1|NBL1|MYCBP2|PLA2G7|CCR5|SLAMF1|CSF3R|SPN|IL16|TIAM1|PLD1|CMKLR1|MET|EF…
GO:0042330	taxis	7.85548e-05	386	BSG|BCAR1|SEMA6B|PPIB|HRAS|LYST|PIKFYVE|MIF|FER|HSPB1|GAB1|RPS19|KIT|CORO1B|MSMP|RAC3|CCR8|ARHGEF16|PIK3CG|DOCK4|GPNMB|SEMA3F|TMEM102|RPL13A|PGF|TNFSF14|ENPP2|VCAM1|ADGRE2|CMTM1|TRPM4|ZNF580|RIPOR2|SUCNR1|STAP1|LYN|SEMA3B|PDGFRA|SLAMF8|BIN2|CCR4|IL6R|NCKAP1L|PTAFR|CCR2|IL10|GPR18|CAMK1D|CYP7B1|DOCK2|PRKCQ|NOD2|RAB13|FPR3|ANXA1|NBL1|MYCBP2|PLA2G7|CCR5|SLAMF1|CSF3R|SPN|IL16|TIAM1|PLD1|CMKLR1|MET|EF…
GO:0006091	generation of precursor metabolites and energy	0.000103891	451	ATP5F1D|UQCRC1|NDUFS7|NDUFB10|GFUS|SIRT6|JMJD8|FDXR|PGLS|COX6B1|NDUFA2|UQCC3|NDUFS3|ATP5IF1|PARK7|ANTKMT|NDUFS6|NDUFB7|COA8|NOP53|UQCRQ|COX7A2|CHCHD2|MLST8|COX17|COX5B|NDUFS8|OGT|NDUFB2|COX7C|NDUFA3|CHCHD10|PRELID1|MTLN|ATP5PF|COX4I1|SCO2|COX5A|SLC27A5|P2RX7|CHCHD5|COX8A
GO:0032649	regulation of type II interferon production	0.00010505	94	HRAS|PTPN22|ZFPM1|CLEC7A|CD160|TXK|CD226|CR1|PYCARD|PDCD1LG2|TLR4|BTN3A1|IL18R1|TLR8|SLAMF6|ISG15|CCR2|IL10|TLR7|CD244|TNF|CD274|NOD2|CD96|CRTAM|SLAMF1|IRF8|PDE4B|IL12RB1|SASH3|XCL1|IL33|IL1RL1|IL1R1|CD2|CD3E|CCR7|ZNF683|LTA|RASGRP1|PGLYRP2|IL12RB2
GO:0009199	ribonucleoside triphosphate metabolic process	0.000118193	215	ATP5F1D|NDUFS7|NDUFB10|SIRT6|JMJD8|NDUFA2|UQCC3|NDUFS3|BAD|ATP5IF1|ANTKMT|NDUFS6|NME3|NDUFB7|FIS1|MLST8|NDUFS8|OGT|NDUFB2|NDUFA3|ATP5PF|P2RX7|ATP5ME|NDUFB11|ATP5MC2|NME4|ITPA|NDUFB1|ATP5MC1|NDUFB4|NDUFA1|ENO3|ATP5PO|GALK1|IMPDH2|PFKL|ZBTB20|NDUFS5
GO:0042098	T cell proliferation	0.000141369	183	PRDX2|SOS1|MALT1|GPAM|P2RX7|PTPN22|RC3H2|DOCK8|CD151|RPS3|TMEM131L|CR1|PIK3CG|GPNMB|FYN|PTPRC|PYCARD|PDCD1LG2|TNFSF14|VCAM1|TNFSF13B|IL15|RIPOR2|BTN3A1|CD28|TGFBR2|DHPS|TSPAN32|NCKAP1L|CCR2|IL10|CD80|DOCK2|PRKCQ|CD274|TNFSF8|CD209|CRTAM|VSIG4|ANXA1|PELI1|SLAMF1|SPN|CD86|TNFRSF9|TNFSF18|IL2RA|TFRC|IL12RB1|PLA2G2D|CD40LG|SASH3|XCL1|IDO1|IGF1|CD3E|IL6|ZAP70|TNFRSF13C|CTLA4|IGFBP2|CD6|CDKN2A|VTCN1|FO…
GO:0050900	leukocyte migration	0.000146422	346	BSG|SOS1|PPIB|LYST|PIKFYVE|MIF|PTPN22|FER|DOCK8|ROCK1|RPS19|KIT|PTGER4|MSMP|RAC3|PIK3CG|TMEM102|RPL13A|FYN|RABGEF1|PGF|PYCARD|TNFSF14|VCAM1|ADGRE2|TRPM4|ZNF580|RIPOR2|STAP1|LYN|SLAMF8|CD200|CD200R1|ITGB1|IL6R|TNFRSF18|NCKAP1L|PTAFR|CCR2|IL10|GPR18|CAMK1D|CYP7B1|TNF|NOD2|CRTAM|ECM1|ANXA1|SELE|NBL1|PLA2G7|MCOLN2|CCR5|SLAMF1|CSF3R|SPN|IL16|CMKLR1|TACR1|TNFRSF11A|SLC12A2|VEGFD|DBH|GCNT1|CXCR2|TNFSF18…
GO:0032946	positive regulation of mononuclear cell proliferation	0.000160482	125	GPAM|ATAD5|MIF|PTPN22|RPS3|IL7|PTPRC|CD38|PYCARD|PDCD1LG2|TLR4|VCAM1|CD320|TNFSF13B|IL15|BTK|CD28|TGFBR2|DHPS|NCKAP1L|CCR2|CD80|NFATC2|PRKCQ|CD274|CD209|ANXA1|PELI1|SLAMF1|SPN|TACR1|PRLR|CD86|IL2RA|TFRC|IL12RB1|CD40LG|SASH3|XCL1|FCRL3|IGF1|GPR183|CD3E|IL6|ZAP70|TNFRSF13C|IGFBP2|CD6
GO:0022613	ribonucleoprotein complex biogenesis	0.000161428	447	WDR18|SF3A2|ZNF593|RPS15|XAB2|EIF3G|RUVBL2|YJU2|NOP16|CINP|NHP2|PIH1D1|TSR3|SNRPD2|NOP53|YBEY|RPL26L1|ATM|DDX47|BUD23|NSUN5|RPL35|RPS9|SART1|MDN1|RPS28|SF3B5|AGO3|RPL24|RPL14|MRPL20|RPS14|TBL3|RPUSD1|EXOSC5|AGO4|MRM3|EXOSC4|CELF2|UTP20|RRP9|SETX|POP7|EIF3K|TSSC4|KRI1|RPS5|NOC4L|RPS19BP1|GTF2H5|LSM4|WDR74
GO:0002285	lymphocyte activation involved in immune response	0.000171832	171	MALT1|RIF1|KMT2A|ATAD5|RC3H2|ZFPM1|DOCK11|CD160|LGALS1|PRKCZ|PTGER4|STAT4|RORA|CR1|PTPRC|TLR4|IRF4|JUNB|FGL2|IL18R1|EOMES|NOTCH2|CD28|APBB1IP|SLAMF6|NLRP3|IL6R|NCKAP1L|POU2AF1|IL10|CD180|CD80|CD244|PLCL2|APLF|DOCK10|ANXA1|LY9|SPN|IRF8|ITM2A|PLCG2|FCGR2B|NFKBIZ|CD86|JAK3|TNFSF18|TFRC|IL12RB1|CD40LG|ITGAL|LCP1|RORC|CLEC4E|GPR183|TBX21|IL6|CD19|ZNF683
REAC:R-HSA-71291	Metabolism of amino acids and derivatives	0.000184202	330	RPS15|OAZ1|RPL36AL|MTR|PSMB6|EEFSEC|RPLP1|RPL28|GSTZ1|RPL18|RPL26L1|FAU|HSD17B10|RPL35|NMRAL1|RPS9|RPS28|PSMC3|RPL24|RPL14|RPS14|TXN2|RPL36|PSMC5|BCAT2|RPL29|RPL32|RPS2|RPS5|RPL8|PSMA2|TSTD1|RPS19|SLC25A10|RPL12|RPLP2|SQOR|RPS3|SRM|SDSL|RPL3|SEM1|RPL11|TST|GLS|RPL41|RPS27L|GAMT|DMGDH|TXNRD1|RPL38|RPL37A|RPL13A|PYCR2|PSMB3|RPL13|RPS8|GCAT|RPS16|RPS11
REAC:R-HSA-6799198	Complex I biogenesis	0.000195576	51	NDUFS7|NDUFB10|ECSIT|NDUFA2|NDUFS3|NDUFS6|NDUFB7|NDUFAF3|NDUFS8|NDUFB2|NDUFA3|NDUFB11|NDUFB1|NDUFB4|NDUFA1
GO:0070665	positive regulation of leukocyte proliferation	0.00020388	137	GPAM|ATAD5|MIF|PTPN22|RPS3|KIT|IL7|PTPRC|CD38|PYCARD|PDCD1LG2|CSF2RB|TLR4|VCAM1|CD320|TNFSF13B|IL15|LYN|BTK|CD28|TGFBR2|DHPS|NCKAP1L|CCR2|CD80|NFATC2|PRKCQ|CD274|CD209|ANXA1|PELI1|SLAMF1|SPN|TACR1|PRLR|CD86|IL2RA|TFRC|IL12RB1|CD40LG|SASH3|XCL1|FCRL3|IGF1|GPR183|CD3E|IL6|ZAP70|TNFRSF13C|IGFBP2|CD6
GO:0140053	mitochondrial gene expression	0.000217754	160	MRPL54|MRPL34|MRPS34|AURKAIP1|MRPL52|MRPL28|MRPL4|PTCD1|GADD45GIP1|MRPL57|MRPS11|MRPL22|MRPL55|MRPL41|TUFM|HSD17B10|MRPL12|POLRMT|CHCHD10|MRPL20|MRPL24|MRPL27|MRPS12|MRPL23|MRPL40|FASTK|MRPS26
GO:0046034	ATP metabolic process	0.000258955	186	ATP5F1D|NDUFS7|NDUFB10|SIRT6|JMJD8|NDUFA2|UQCC3|NDUFS3|BAD|ATP5IF1|ANTKMT|NDUFS6|NDUFB7|FIS1|MLST8|NDUFS8|OGT|NDUFB2|NDUFA3|ATP5PF|P2RX7|ATP5ME|NDUFB11|ATP5MC2|NDUFB1|ATP5MC1|NDUFB4|NDUFA1|ENO3|ATP5PO|GALK1|PFKL|ZBTB20|NDUFS5
GO:0009141	nucleoside triphosphate metabolic process	0.000280166	231	ATP5F1D|NDUFS7|NDUFB10|SIRT6|JMJD8|NDUFA2|UQCC3|NDUFS3|BAD|ATP5IF1|ANTKMT|NDUFS6|NME3|NDUFB7|FIS1|GUK1|MLST8|NDUFS8|OGT|NDUFB2|NDUFA3|ATP5PF|P2RX7|ATP5ME|NDUFB11|ATP5MC2|NME4|ITPA|NDUFB1|ATP5MC1|NDUFB4|NDUFA1|ENO3|ATP5PO|GALK1|IMPDH2|PFKL|ZBTB20|NDUFS5
GO:0045058	T cell selection	0.000296848	50	STK11|CYLD|ZFPM1|PTPRC|JAG2|IRF4|IL15|CD28|THEMIS|SLAMF6|CD3G|IL6R|DOCK2|LY9|SPN|CD4|IL12RB1|BCL11B|TBX21|CD3E|IL6|ZAP70|CCR7|BATF|TOX|CD3D|FOXN1
GO:0060326	cell chemotaxis	0.000302823	265	BSG|BCAR1|PPIB|LYST|PIKFYVE|MIF|HSPB1|GAB1|RPS19|KIT|CORO1B|MSMP|RAC3|CCR8|ARHGEF16|PIK3CG|DOCK4|TMEM102|RPL13A|PGF|TNFSF14|VCAM1|ADGRE2|TRPM4|ZNF580|RIPOR2|STAP1|LYN|PDGFRA|SLAMF8|BIN2|CCR4|IL6R|NCKAP1L|CCR2|IL10|GPR18|CAMK1D|CYP7B1|PRKCQ|NOD2|RAB13|ANXA1|NBL1|PLA2G7|CCR5|SLAMF1|CSF3R|IL16|TIAM1|CMKLR1|MET|CXCR6|XCR1|TNFRSF11A|EPHB1|SLC12A2|VEGFD|CXCR2|CCL4|PDE4B|DPP4|XCL2|CXCL12|CCL8|CCR1|HGF|C…
GO:0042113	B cell activation	0.000304209	241	BAD|MALT1|RIF1|ATP11C|ATM|CYLD|ATAD5|MIF|LAX1|DOCK11|IKZF3|KIT|PKN1|LGALS1|TNFAIP3|IL7|CR1|PTPRC|CD38|TLR4|PRKDC|VCAM1|CD320|PRKCB|TNFSF13B|LYN|BTK|NOTCH2|CD28|SLAMF8|SKAP2|BANK1|INPP5D|ITGB1|TSHR|NCKAP1L|POU2AF1|IL10|CD180|NFATC2|HDAC9|NOD2|PLCL2|SAMSN1|APLF|DOCK10|PELI1|IRF8|ITM2A|PLCG2|THEMIS2|IL7R|MNDA|PRLR|FCGR2B|NFKBIZ|CD86|JAK3|PAX5|CR2|TFRC|RAG1|MS4A1|CD40LG|SASH3|SFRP1|ITGA4|FCRL3|GPR183…
GO:0032543	mitochondrial translation	0.000341166	127	MRPL54|MRPL34|MRPS34|AURKAIP1|MRPL52|MRPL28|MRPL4|PTCD1|GADD45GIP1|MRPL57|MRPS11|MRPL22|MRPL55|MRPL41|TUFM|MRPL12|MRPL20|MRPL24|MRPL27|MRPS12|MRPL23
GO:0002703	regulation of leukocyte mediated immunity	0.000353952	201	STXBP2|MALT1|RIF1|P2RX7|ATAD5|FER|CLEC7A|CD160|GFER|KIT|PRKCZ|DNASE1|NECTIN2|CD226|CR1|KLRD1|RABGEF1|PTPRC|SERPINB9|TLR4|CLNK|ADGRE2|TRPM4|STAP1|LYN|IL18R1|BTK|CD84|CD28|SLAMF6|SCIMP|NLRP3|NCKAP1L|PTAFR|CCR2|IL10|CD80|TNF|NOD2|ITGAM|APLF|CD96|CRTAM|IL18RAP|SVEP1|SLAMF1|SPN|PLCG2|C3|IL7R|FCGR2B|JAK3|CR2|SH2D1A|KLRC1|GAB2|TFRC|IL12RB1|SASH3|XCL1|SH2D1B|IL1R1|TBX21|IL6|DNASE1L3
GO:0033108	mitochondrial respiratory chain complex assembly	0.000369685	92	NDUFS7|NDUFB10|ECSIT|NDUFA2|UQCC3|NDUFS3|NDUFB7|COA8|SDHAF1|COX17|NDUFAF3|NDUFS8|NDUFB2|NDUFA3|SCO2|TMEM223|NDUFB11|NDUFB1|NDUFB4|NDUFA1
GO:0051251	positive regulation of lymphocyte activation	0.000405791	285	BAD|MALT1|RIF1|ATP11C|GPAM|PTPN11|CYLD|SART1|ATAD5|MIF|PTPN22|DOCK8|CLEC7A|CD160|VNN1|RPS3|LGALS1|PRKCZ|IL7|CR1|SMARCD3|FYN|PTPRC|CD38|PYCARD|PDCD1LG2|TNFSF14|TLR4|PRKDC|VCAM1|CD320|TNFSF13B|TESPA1|IL15|LYN|BTK|CD28|TGFBR2|INPP5D|MAP3K8|NLRP3|DHPS|NCKAP1L|CCR2|IL10|CD80|NFATC2|PRKCQ|CD274|NOD2|CD209|ANXA1|PELI1|SLAMF1|SPN|ICOS|EFNB2|TACR1|IL7R|PRLR|NFKBIZ|CD86|IL2RA|LCK|DPP4|RUNX3|CD4|TFRC|IL12RB…
GO:0007186	G protein-coupled receptor signaling pathway	0.00053071	586	RAPGEF2|CIB1|GNB2|P2RY11|BCAR1|GNG5|DGKH|ABCA1|GIPC1|GPR75|RGS13|TBXA2R|AGTRAP|GRK3|PDE3B|ROCK1|SCN11A|ZNF219|BAIAP3|PTGER4|CCR8|TENM1|ADGRD1|RGS17|GNG2|PRKD3|PIK3CG|ADGRG6|ADCY7|GNB4|SORL1|P2RY14|NPFFR1|BICD1|PRKCB|ADGRF3|ADGRE2|RAMP1|GPR158|OR7C1|GPR174|GPR173|SUCNR1|LYN|ARRDC3|TAS2R4|UCN|TAS2R5|GPR161|PRKCA|PLEK|RGS18|GPR171|PIK3R5|RAMP3|TSHR|GPRASP1|CCR4|PTAFR|CCR2|PLCB4|GPR18|PLCB2|ADGRL2|SL…
GO:1990868	response to chemokine	0.000730651	77	CIB1|GPR75|DOCK8|CCR8|RIPOR2|LYN|CCR4|CCR2|HIF1A|CCR5|THPO|CMKLR1|CXCR6|XCR1|SLC12A2|CXCR2|CCL4|XCL2|CXCL12|CCL8|CCR1|CXCL2|XCL1|CXCL9|CCR7|CCL2|CCL13|CCL18|ROBO1|CXCR3|CXCL11|CXCL10|CX3CL1|CCL11|CCL5
GO:1990869	cellular response to chemokine	0.000730651	77	CIB1|GPR75|DOCK8|CCR8|RIPOR2|LYN|CCR4|CCR2|HIF1A|CCR5|THPO|CMKLR1|CXCR6|XCR1|SLC12A2|CXCR2|CCL4|XCL2|CXCL12|CCL8|CCR1|CXCL2|XCL1|CXCL9|CCR7|CCL2|CCL13|CCL18|ROBO1|CXCR3|CXCL11|CXCL10|CX3CL1|CCL11|CCL5
GO:0030888	regulation of B cell proliferation	0.000753945	58	ATM|ATAD5|MIF|IKZF3|PKN1|IL7|PTPRC|CD38|TLR4|CD320|TNFSF13B|LYN|BTK|INPP5D|NCKAP1L|IL10|NFATC2|PELI1|MNDA|PRLR|FCGR2B|TFRC|SASH3|FCRL3|GPR183|TNFRSF13C|CTLA4|CDKN2A
GO:0015980	energy derivation by oxidation of organic compounds	0.000791078	291	ATP5F1D|UQCRC1|NDUFS7|NDUFB10|COX6B1|NDUFA2|UQCC3|NDUFS3|PARK7|ANTKMT|NDUFS6|NDUFB7|NOP53|UQCRQ|COX7A2|CHCHD2|COX5B|NDUFS8|NDUFB2|COX7C|NDUFA3|CHCHD10|PRELID1|MTLN|ATP5PF|COX4I1|SCO2|COX5A|CHCHD5|COX8A|PHLDA2|ATP5ME|NDUFB11
GO:0031347	regulation of defense response	0.000803746	665	ECSIT|CDC37|OTUD4|ERCC6|CPTP|PARK7|NR1H2|NOP53|RICTOR|ATM|RAB11FIP2|ANKRD17|GPX1|PTPN11|RPS6KA3|CYLD|NFKBIL1|ZDHHC12|PQBP1|PTPN22|SOD1|CLEC7A|RHBDD3|TRIM11|CD160|PAK3|RPS19|NLRC3|GFER|ALPK1|NAGLU|NAIP|CTSS|MATR3|LGALS1|PTGER4|DNASE1|NECTIN2|IL10RA|TXK|TLR1|METRNL|TNFAIP3|CD226|RORA|NLRC4|CR1|KLRD1|SHARPIN|GSDMD|PIK3AP1|PIK3CG|TRIM22|FYN|RABGEF1|PTPRC|ETS1|SERPINB9|PYCARD|TLR4|PRKDC|CLNK|F12|IRF4|…
REAC:R-HSA-500792	GPCR ligand binding	0.000859833	261	GNB2|P2RY11|GNG5|TBXA2R|PLPPR2|PTGER4|CCR8|GNG2|GNB4|P2RY14|NPFFR1|ADGRE2|RAMP1|SUCNR1|PTCH1|TAS2R4|UCN|TAS2R5|RAMP3|TSHR|CCR4|PTAFR|CCR2|GPR18|ADRB2|GPER1|FPR3|ANXA1|GPR65|HCAR2|XK|FZD6|CCR5|CALCR|P2RY10|CMKLR1|CXCR6|TACR1|XCR1|CYSLTR2|C3|PTGFR|PTGDR|CXCR2|HTR2B|LPAR4|UTS2|TAS2R20|CCL4|GPR132|XCL2|CXCL12|CCR1|GPR55|CXCL2|XCL1|PTCH2|CXCL9|DRD2|P2RY13|GPR183|HCAR3|CYSLTR1|CCR7|CCL2|CCL13|PNOC|SCT|…
REAC:R-HSA-8953854	Metabolism of RNA	0.000866132	678	WDR18|SF3A2|POLR2E|RPS15|XAB2|YJU2|GTF2F1|UBB|RBM42|LENG1|UBL5|RPL36AL|PSMB6|POLR2I|NHP2|POLR2L|TSR3|SNRPD2|CCDC12|LSM3|RPLP1|BUD31|RPL28|LSM7|RPL18|SMG1|RPL26L1|FAU|HSD17B10|DDX47|BUD23|RPL35|RPS9|SART1|RPS28|PSMC3|SF3B5|RPL24|RPL14|THOC6|RPS14|TBL3|EXOSC5|MRM3|RPL36|EXOSC4|PQBP1|PSMC5|UTP20|ZMAT5|RRP9|POLR2J|POP7|RPL29|RPL32|RPS2|TRMT61A|FAM50A|LSM10|RPS5|RPL8|HSPB1|NOC4L|PSMA2|GTF2H5|LSM4|TUT4…
GO:0070098	chemokine-mediated signaling pathway	0.000883277	68	CIB1|GPR75|CCR8|LYN|CCR4|CCR2|HIF1A|CCR5|THPO|CMKLR1|CXCR6|XCR1|CXCR2|CCL4|XCL2|CXCL12|CCL8|CCR1|CXCL2|XCL1|CXCL9|CCR7|CCL2|CCL13|CCL18|ROBO1|CXCR3|CXCL11|CXCL10|CX3CL1|CCL11|CCL5
REAC:R-HSA-372790	Signaling by GPCR	0.00105145	472	GNB2|P2RY11|SOS1|RHOC|GNG5|RPS6KA3|HRAS|DGKH|ITSN1|RGS13|TBXA2R|GRK3|PDE3B|ARHGEF6|ROCK1|PRKX|CDK5|PCP2|FGD4|PLPPR2|PTGER4|CCR8|RGS17|ARHGEF16|GNG2|PIK3CG|ADCY7|GNB4|P2RY14|NPFFR1|PRKCB|ADGRE2|RAMP1|SUCNR1|BTK|PRKAR1B|PTCH1|TAS2R4|UCN|CAMKK1|TAS2R5|ARHGEF33|PRKCA|RGS18|PIK3R5|RAMP3|ITGB1|TSHR|CCR4|PTAFR|CCR2|PLCB4|GPR18|PLCB2|ADRB2|PRKCQ|PDE4A|GPER1|FPR3|CAMK2D|ANXA1|GPR65|ADCY2|HCAR2|XK|FZD6|CCR…
GO:0032729	positive regulation of type II interferon production	0.00107501	62	HRAS|PTPN22|ZFPM1|CLEC7A|CD160|TXK|CD226|PYCARD|TLR4|BTN3A1|IL18R1|TLR8|SLAMF6|ISG15|CCR2|TLR7|CD244|TNF|CRTAM|SLAMF1|IRF8|PDE4B|IL12RB1|SASH3|IL1R1|CD2|CD3E|LTA|RASGRP1|IL12RB2
GO:0002695	negative regulation of leukocyte activation	0.00109296	158	PRDX2|ATM|PTPN22|RC3H2|FER|LAX1|RHBDD3|TMEM131L|PKN1|TNFAIP3|CR1|GPNMB|PAG1|RABGEF1|PTPRC|PDCD1LG2|CLNK|FGL2|RIPOR2|LYN|MERTK|BTK|CD84|CD200|BANK1|INPP5D|MILR1|TSPAN32|IL10|CD274|SAMSN1|CRTAM|GPER1|SYT11|VSIG4|ANXA1|PELI1|RASSF5|SPN|TIGIT|MNDA|FCGR2B|JAK3|IL2RA|RUNX3|PLA2G2D|SFRP1|XCL1|IDO1|TBX21|CTLA4|CNR1|CDKN2A|CX3CL1|VTCN1|FOXJ1|TBC1D10C|PGLYRP2
GO:0002698	negative regulation of immune effector process	0.00109539	94	CUEDC2|RC3H2|FER|RPS19|GFER|CR1|KLRD1|RABGEF1|PTPRC|SERPINB9|FGL2|CD84|SLAMF8|NCKAP1L|CCR2|IL10|CD80|TNF|NOD2|CD96|VSIG4|ANXA1|SVEP1|SLAMF1|SPN|ANGPT1|IL7R|FCGR2B|JAK3|CR2|KLRC1|XCL1|IL33|FCRL3|TBX21|FOXJ1|TGFB2|PGLYRP2|BST2|IRAK3
GO:0050870	positive regulation of T cell activation	0.00120665	214	BAD|MALT1|GPAM|PTPN11|CYLD|SART1|PTPN22|DOCK8|CD160|VNN1|RPS3|LGALS1|PRKCZ|IL7|CR1|SMARCD3|FYN|PTPRC|PYCARD|PDCD1LG2|TNFSF14|VCAM1|TNFSF13B|TESPA1|IL15|LYN|CD28|TGFBR2|MAP3K8|NLRP3|DHPS|NCKAP1L|CCR2|CD80|PRKCQ|CD274|NOD2|CD209|ANXA1|SLAMF1|SPN|ICOS|EFNB2|IL7R|NFKBIZ|CD86|IL2RA|LCK|DPP4|RUNX3|CD4|TFRC|IL12RB1|RAG1|CD40LG|SASH3|XCL1|CD5|IGF1|CD3E|IL6|ZAP70|CCR7|CCL2|SIRPG|TNFRSF13C|IGFBP2|CD6|VTCN1…
GO:0042102	positive regulation of T cell proliferation	0.00128588	85	GPAM|PTPN22|RPS3|PTPRC|PYCARD|PDCD1LG2|VCAM1|TNFSF13B|IL15|CD28|TGFBR2|DHPS|NCKAP1L|CCR2|CD80|PRKCQ|CD274|CD209|ANXA1|SLAMF1|SPN|CD86|IL2RA|TFRC|IL12RB1|CD40LG|SASH3|XCL1|IGF1|CD3E|IL6|ZAP70|TNFRSF13C|IGFBP2|CD6|VTCN1|CCL5
GO:0002274	myeloid leukocyte activation	0.00146806	205	STXBP2|ATM|CBL|MIF|FER|SCN11A|KIT|NAGLU|DNASE1|NECTIN2|TLR1|CD226|RORA|PIK3CG|RABGEF1|PTPRC|PYCARD|TLR4|CLNK|IRF4|ADGRE2|LRRK2|IL15|SUCNR1|STAP1|LYN|BTK|NOTCH2|CD84|LCP2|CD200|TGFBR2|MILR1|TLR6|TSPAN32|PTAFR|TLR2|CCR2|IL10|CTSC|DOCK2|TNF|ITGAM|SYT11|VSIG4|IL18RAP|ANXA1|SLAMF1|ADAM9|CAMK4|PLCG2|S100A13|FCGR2B|PTGDR|CXCR2|GAB2|IL33|DHRS2|IL1RL1|CD2|IL6|DNASE1L3|NR4A3|GRP|PLA2G4A|CNR1|CX3CL1|BATF|RA…
GO:0019221	cytokine-mediated signaling pathway	0.00151071	411	AGPAT2|CIB1|CDC37|SOS1|OTUD4|BAD|NR1H2|TXNDC17|CBL|PTPN11|CYLD|KRT8|SIGIRR|KRT18|FER|SPPL2B|GPR75|EIF5A|KIT|NAIP|LEPR|IL10RA|TXK|TNFAIP3|CCR8|STAT4|IL7|SHARPIN|TRAF1|MIB2|RABGEF1|PTPRC|PYCARD|CSF2RB|CNTF|MFAP3|TNFSF13B|TRADD|IRF7|IL15|STAP1|LYN|IL18R1|NOL3|GFI1|BIRC3|DOK1|ISG15|HSPA1A|CCR4|IL6R|TNFRSF18|IFITM2|CCR2|TNF|MED1|AIM2|IL18RAP|ECM1|HIF1A|CCR5|CSF3R|NLRC5|THPO|CMKLR1|TNFRSF17|CXCR6|XCR1|…
GO:0022409	positive regulation of cell-cell adhesion	0.00186463	274	BAD|MALT1|NFAT5|GPAM|PTPN11|CYLD|SART1|PTPN22|DOCK8|CD160|VNN1|RPS3|LGALS1|PRKCZ|IL7|CR1|SMARCD3|FYN|PTPRC|ETS1|PYCARD|PDCD1LG2|TNFSF14|VCAM1|TNFSF13B|TESPA1|IL15|LYN|CD28|TGFBR2|MAP3K8|NLRP3|DHPS|NCKAP1L|PTAFR|FSTL3|CCR2|IL10|CD80|EMILIN2|TNF|PRKCQ|CD274|NOD2|CD209|ANXA1|SELE|SLAMF1|SPN|ICOS|EFNB2|IL7R|GCNT1|NFKBIZ|CD86|IL2RA|LCK|DPP4|RUNX3|CD4|TFRC|IL12RB1|RAG1|CD40LG|SASH3|ITGA4|XCL1|CD5|IGF1|…
REAC:R-HSA-9707564	Cytoprotection by HMOX1	0.00191891	57	COX6B1|COX5B|COX7C|COX4I1|SCO2|COX5A|COX8A|CHD9|BLVRB|PTK6|BACH1|NCOA2|SURF1|SMARCD3|STAP2|COX6A1|COX16|TXNIP|MED1|PPARA|COX6C|ALB
GO:0032103	positive regulation of response to external stimulus	0.001979	534	ECSIT|OTUD4|CPTP|PARK7|NOP53|RAB11FIP2|ANKRD17|RPS6KA3|NFKBIL1|ZDHHC12|PQBP1|MIF|PTPN22|HSPB1|CLEC7A|TRIM11|CD160|PAK3|RPS19|NLRC3|ALPK1|NAGLU|NAIP|CTSS|MATR3|LGALS1|PTGER4|NECTIN2|TXK|TLR1|TNFAIP3|CD226|NLRC4|KLRD1|GSDMD|PIK3AP1|PIK3CG|TMEM102|FYN|ETS1|PGF|PYCARD|TNFSF14|TLR4|PRKDC|CLNK|CNTF|IRF4|LRRK2|TRADD|RFTN1|ZNF580|IRF7|IL15|RIPOR2|SUCNR1|STAP1|LYN|TLR8|BTK|PDGFRA|CD28|GFI1|BIRC3|PRKCA|SLA…
GO:0042129	regulation of T cell proliferation	0.00202746	150	SOS1|GPAM|PTPN22|RPS3|TMEM131L|CR1|GPNMB|PTPRC|PYCARD|PDCD1LG2|VCAM1|TNFSF13B|IL15|RIPOR2|CD28|TGFBR2|DHPS|TSPAN32|NCKAP1L|CCR2|IL10|CD80|PRKCQ|CD274|TNFSF8|CD209|CRTAM|VSIG4|ANXA1|PELI1|SLAMF1|SPN|CD86|TNFRSF9|TNFSF18|IL2RA|TFRC|IL12RB1|PLA2G2D|CD40LG|SASH3|XCL1|IDO1|IGF1|CD3E|IL6|ZAP70|TNFRSF13C|CTLA4|IGFBP2|CD6|CDKN2A|VTCN1|FOXJ1
GO:0002449	lymphocyte mediated immunity	0.00208209	238	MALT1|RIF1|LYST|P2RX7|ATAD5|TUBB4B|CD160|GFER|PRKCZ|NECTIN2|CD226|CR1|KLRD1|PTPRC|SERPINB9|CSF2RB|CLNK|SLAMF7|TRPM4|RFTN1|IRF7|IL18R1|TLR8|BTK|CD28|INPP5D|SLAMF6|NLRP3|NCKAP1L|CCR2|IL10|CTSC|BTN3A3|CD80|TNF|NOD2|APLF|CD96|CRTAM|FCMR|IL18RAP|SVEP1|SLAMF1|SPN|SCART1|CD8A|C3|IL7R|FCGR2B|NFKBIZ|CR2|SH2D1A|KLRC1|TFRC|IL12RB1|C1S|CD40LG|SASH3|XCL1|NCR3LG1|SH2D1B|C8G|IL1R1|IL21R|CD2|C4B|TBX21|IL2RB|IL6|…
GO:0002819	regulation of adaptive immune response	0.0021826	173	MALT1|RIF1|P2RX7|ATAD5|RC3H2|CLEC7A|CD160|PKN1|PRKCZ|NECTIN2|TNFAIP3|CD226|CR1|KLRD1|ADCY7|PTPRC|PYCARD|TNFSF13B|TRPM4|IRF7|JUNB|IL18R1|BTK|CD28|NLRP3|NCKAP1L|CCR2|IL10|CD80|TNF|PRKCQ|CD274|NOD2|SAMSN1|APLF|ANXA1|SVEP1|SLAMF1|SPN|C3|IL7R|FCGR2B|NFKBIZ|JAK3|CR2|KLRC1|CD4|TFRC|IL12RB1|SASH3|XCL1|IL33|IL1RL1|IL1R1|TBX21|IL6|LTA|PLA2G4A|BATF|FOXJ1
REAC:R-HSA-388396	GPCR downstream signalling	0.00272936	418	GNB2|P2RY11|SOS1|RHOC|GNG5|RPS6KA3|HRAS|DGKH|ITSN1|RGS13|TBXA2R|GRK3|PDE3B|ARHGEF6|ROCK1|PRKX|CDK5|PCP2|FGD4|PTGER4|CCR8|RGS17|ARHGEF16|GNG2|PIK3CG|ADCY7|GNB4|P2RY14|NPFFR1|PRKCB|RAMP1|SUCNR1|BTK|PRKAR1B|TAS2R4|CAMKK1|TAS2R5|ARHGEF33|PRKCA|RGS18|PIK3R5|RAMP3|ITGB1|TSHR|CCR4|PTAFR|CCR2|PLCB4|GPR18|PLCB2|ADRB2|PRKCQ|PDE4A|GPER1|FPR3|CAMK2D|ANXA1|GPR65|ADCY2|HCAR2|CCR5|RGS11|CALCR|P2RY10|TIAM1|CAMK4…
GO:0050864	regulation of B cell activation	0.00310864	124	BAD|RIF1|ATP11C|ATM|CYLD|ATAD5|MIF|IKZF3|PKN1|TNFAIP3|IL7|CR1|PTPRC|CD38|TLR4|CD320|TNFSF13B|LYN|BTK|CD28|SLAMF8|BANK1|INPP5D|NCKAP1L|IL10|NFATC2|NOD2|SAMSN1|APLF|PELI1|THEMIS2|MNDA|PRLR|FCGR2B|TFRC|SASH3|SFRP1|FCRL3|GPR183|TBX21|IL6|CD19|TNFRSF13C|CTLA4|CDKN2A|FOXJ1|TBC1D10C
REAC:R-HSA-5628897	TP53 Regulates Metabolic Genes	0.00326019	80	PRDX2|COX6B1|LAMTOR2|LAMTOR4|TNRC6B|MLST8|COX5B|AGO3|COX7C|AGO4|COX4I1|SCO2|COX5A|COX8A
GO:0009152	purine ribonucleotide biosynthetic process	0.00355282	185	ATP5F1D|NDUFS7|NDUFB10|NDUFA2|UQCC3|NDUFS3|ANTKMT|NDUFS6|NME3|NDUFB7|GUK1|NDUFS8|NDUFB2|NDUFA3|SLC25A1|ATP5PF|ATP5ME|TECR|NDUFB11|ATP5MC2|ACSL4|NME4|NDUFB1|ATP5MC1|NDUFB4|NDUFA1|ATP5PO|IMPDH2|NDUFS5|GUCY1A1|AK1|ATP5PD|NME1|ADCY7|AMPD3|ATP5F1E|ATP5MF|APRT
REAC:R-HSA-198933	Immunoregulatory interactions between a Lymphoid and a non-Lymphoid cell	0.00367659	98	CLEC2D|CD160|NPDC1|NECTIN2|CD226|KLRD1|VCAM1|SIGLEC6|SLAMF7|CD200|SLAMF6|CD200R1|ITGB1|CD3G|LILRB5|CD96|CRTAM|CD8A|C3|FCGR2B|KLRG1|SH2D1A|KLRC1|LILRA1|CD40LG|ITGAL|ITGA4|NCR3LG1|SH2D1B|CD3E|SELL|CD19|LILRA6|JAML|SIGLEC1|CD8B|KLRB1|CD300E|LILRA4|CD3D
GO:0010257	NADH dehydrogenase complex assembly	0.00368366	55	NDUFS7|NDUFB10|ECSIT|NDUFA2|NDUFS3|NDUFB7|NDUFAF3|NDUFS8|NDUFB2|NDUFA3|NDUFB11|NDUFB1|NDUFB4|NDUFA1
GO:0032981	mitochondrial respiratory chain complex I assembly	0.00368366	55	NDUFS7|NDUFB10|ECSIT|NDUFA2|NDUFS3|NDUFB7|NDUFAF3|NDUFS8|NDUFB2|NDUFA3|NDUFB11|NDUFB1|NDUFB4|NDUFA1
GO:0050854	regulation of antigen receptor-mediated signaling pathway	0.00369164	64	PHPT1|MALT1|CYLD|PTPN22|CD160|RPS3|NECTIN2|CD226|PTPRC|PRKCB|TESPA1|RAB29|STAP1|LYN|LPXN|PLCL2|FCMR|TRAT1|FCGR2B|LCK|SH2D1A|UBASH3A|GCSAM|GBP1|FCRL3|CD19|CCR7|GCSAML
GO:0002548	monocyte chemotaxis	0.0040681	53	RPS19|MSMP|LYN|SLAMF8|IL6R|CCR2|ANXA1|NBL1|PLA2G7|TNFRSF11A|CCL4|XCL2|CXCL12|CCL8|CCR1|S100A14|XCL1|IL6|CCL2|CCL13|CCL18|PTPRO|CXCL10|CX3CL1|CCL11|CCL5
GO:0002237	response to molecule of bacterial origin	0.00407299	289	PRDX2|MALT1|WDR83|RPS6KA3|NFKBIL1|ABCA1|P2RX7|SIGIRR|MIF|PTPN22|FER|TBXA2R|GFER|NAGLU|PTGER4|IL10RA|TLR1|TNFAIP3|NFKBIB|RPL13A|PYCARD|PDCD1LG2|CSF2RB|TLR4|TSPO|VCAM1|STAP1|LYN|BTK|GFI1|NUGGC|PRKCA|SCIMP|NLRP3|MRC1|TLR6|PTAFR|SOD2|TLR2|IL10|TNIP3|CD180|CD80|TNF|CD274|NOD2|CD96|CD68|TIFAB|SELE|PELI1|CCR5|ADAM9|IRF8|LOXL1|PLCG2|TNFRSF11A|PTGFR|CPS1|FASLG|FCGR2B|NFKBIZ|CD86|SASH1|PDE4B|CXCL2|S100A14|…
GO:0042254	ribosome biogenesis	0.00412169	303	WDR18|ZNF593|RPS15|NOP16|CINP|NHP2|PIH1D1|TSR3|NOP53|YBEY|RPL26L1|DDX47|BUD23|NSUN5|RPL35|RPS9|SART1|MDN1|RPS28|RPL24|RPL14|MRPL20|RPS14|TBL3|RPUSD1|EXOSC5|MRM3|EXOSC4|UTP20|RRP9|POP7|KRI1|RPS5|NOC4L|RPS19BP1|GTF2H5|WDR74
REAC:R-HSA-373076	Class A/1 (Rhodopsin-like receptors)	0.00417958	187	P2RY11|TBXA2R|PLPPR2|PTGER4|CCR8|P2RY14|NPFFR1|SUCNR1|TSHR|CCR4|PTAFR|CCR2|GPR18|ADRB2|GPER1|FPR3|ANXA1|GPR65|HCAR2|XK|CCR5|P2RY10|CMKLR1|CXCR6|TACR1|XCR1|CYSLTR2|C3|PTGFR|PTGDR|CXCR2|HTR2B|LPAR4|UTS2|CCL4|GPR132|XCL2|CXCL12|CCR1|GPR55|CXCL2|XCL1|CXCL9|DRD2|P2RY13|GPR183|HCAR3|CYSLTR1|CCR7|CCL2|CCL13|PNOC|CXCR3|GRP|CXCL11|CXCL10|CNR1|P2RY12|CX3CL1|HCAR1|OXGR1|CCL11|CCL5|AGTR1|AGT
GO:0045785	positive regulation of cell adhesion	0.00526393	423	GFUS|CIB1|BAD|MALT1|RHOD|NFAT5|ATM|GPAM|DISC1|PTPN11|CYLD|SART1|RRAS|PTPN22|DOCK8|ROCK1|CD160|VNN1|RPS3|LGALS1|PRKCZ|JUP|DAB2|RAC3|IL7|CR1|SMARCD3|TMEM102|FYN|CHRD|PTPRC|ETS1|PYCARD|PDCD1LG2|TNFSF14|VIT|VCAM1|TNFSF13B|TESPA1|IL15|LYN|OLFM4|CD28|DMD|APBB1IP|TGFBR2|PRKCA|MAP3K8|NLRP3|DHPS|TNFRSF18|NCKAP1L|PTAFR|FSTL3|CCR2|IL10|CASS4|CD80|EMILIN2|TNF|PRKCQ|CD274|NOD2|CD209|ANXA1|SELE|SLAMF1|SPN|ADAM…
GO:0050852	T cell receptor signaling pathway	0.00530567	125	PHPT1|MALT1|BCAR1|STK11|CYLD|HRAS|PTPN22|RC3H2|CD160|RPS3|FYB1|NECTIN2|TXK|CD226|FYN|PTPRC|TESPA1|RFTN1|RAB29|BTN3A1|BTK|CD28|LCP2|THEMIS|ITK|INPP5D|CD3G|BTN3A3|PLCG2|CD8A|TRAT1|THEMIS2|NFKBIZ|LCK|SH2D1A|PDE4B|UBASH3A|GBP1|CD247|CD3E|ZAP70|CCR7|ZNF683|CTLA4|CD8B
GO:0002822	regulation of adaptive immune response based on somatic recombination of immune receptors built from immunoglobulin superfamily domains	0.00537654	158	MALT1|RIF1|P2RX7|ATAD5|RC3H2|CLEC7A|PKN1|PRKCZ|NECTIN2|TNFAIP3|CD226|CR1|KLRD1|PTPRC|TNFSF13B|TRPM4|JUNB|IL18R1|BTK|CD28|NLRP3|NCKAP1L|CCR2|IL10|CD80|TNF|PRKCQ|CD274|NOD2|APLF|ANXA1|SVEP1|SLAMF1|SPN|C3|IL7R|FCGR2B|NFKBIZ|JAK3|CR2|KLRC1|CD4|TFRC|IL12RB1|SASH3|XCL1|IL33|IL1RL1|IL1R1|TBX21|IL6|LTA|PLA2G4A|BATF|FOXJ1
GO:0002831	regulation of response to biotic stimulus	0.00559254	442	ECSIT|PRDX2|CDC37|OTUD4|ERCC6|CPTP|NR1H2|NOP53|RAB11FIP2|ANKRD17|PTPN11|RPS6KA3|NFKBIL1|ZDHHC12|PQBP1|SIGIRR|MIF|PTPN22|DAPK1|CLEC7A|TRIM11|CD160|PAK3|RPS19|NLRC3|GFER|ALPK1|NAGLU|NAIP|CTSS|MATR3|NECTIN2|TXK|TLR1|TNFAIP3|CD226|NLRC4|CR1|KLRD1|PIK3AP1|TRIM22|FYN|SERPINB9|PYCARD|TLR4|PRKDC|CLNK|IRF4|RFTN1|IRF7|IL15|FGL2|LYN|TLR8|BTK|GFI1|SLAMF8|BIRC3|PRKCA|SLAMF6|SCIMP|NLRP3|ISG15|HSPA1A|TLR6|TSPAN…
GO:0035710	CD4-positive, alpha-beta T cell activation	0.00569973	105	MALT1|KMT2A|RC3H2|ZFPM1|CD160|PRKCZ|PTGER4|STAT4|RORA|IRF4|JUNB|IL18R1|CD28|TGFBR2|SLAMF6|NLRP3|IL6R|NCKAP1L|CD80|PRKCQ|CD274|ANXA1|LY9|SPN|NFKBIZ|CD86|JAK3|IL2RA|RUNX3|IL12RB1|PLA2G2D|SASH3|XCL1|RORC|GPR183|TBX21|CD3E|IL6|CDH26|BATF|TOX|IL2RG
GO:0002286	T cell activation involved in immune response	0.00588663	93	MALT1|KMT2A|RC3H2|ZFPM1|PRKCZ|PTGER4|STAT4|RORA|IRF4|JUNB|FGL2|IL18R1|EOMES|APBB1IP|SLAMF6|NLRP3|IL6R|NCKAP1L|CD80|ANXA1|LY9|SPN|FCGR2B|NFKBIZ|CD86|JAK3|TNFSF18|IL12RB1|ITGAL|LCP1|RORC|CLEC4E|GPR183|TBX21|IL6
GO:1903052	positive regulation of proteolysis involved in protein catabolic process	0.00593213	126	FBXW7|SIRT6|STUB1|ELOB|ATP5IF1|DNAJB2|NOP53|DDRGK1|RNF19A|HSPBP1|KEAP1|DISC1|RACK1|TMEM259|PSMC3
GO:0019722	calcium-mediated signaling	0.00616864	193	CIB1|P2RY11|FIS1|NFAT5|DMPK|P2RX7|CLEC7A|HPCA|ANK2|SLC8A1|RYR2|CCR8|CLIC2|PTPRC|VCAM1|TRPM4|LRRK2|NR5A2|PRKAA1|MCTP1|BTK|PDGFRA|DMD|SAMD14|PLEK|RAMP3|CCR4|CCR2|NFATC2|SLC24A4|TNF|CAMK2D|SELE|CCR5|CALCR|CMKLR1|TMBIM4|AKAP6|CXCR6|PLCG2|XCR1|PTGFR|TRAT1|CXCR2|HTR2B|CCL4|NFATC4|CD4|KCNJ11|PPP1R9A|CCR1|GBP1|TMEM38B|NCALD|IGF1|DMTN|CD3E|ZAP70|CCR7|CXCR3|P2RY12|GRIN2A|TBC1D10C|SELP|ADGRB2|AGTR1
GO:0046632	alpha-beta T cell differentiation	0.00618618	111	MALT1|KMT2A|RC3H2|ZFPM1|PRKCZ|PTGER4|STAT4|RORA|IRF4|JUNB|IL18R1|EOMES|ITK|TGFBR2|SLAMF6|NLRP3|IL6R|NCKAP1L|GPR18|PRR7|CD80|TNFSF8|ANXA1|PRDM1|LY9|SPN|NFKBIZ|CD86|JAK3|RUNX3|IL12RB1|PLA2G2D|SASH3|RORC|BCL11B|GPR183|TBX21|IL6|ZAP70|ZNF683
GO:0022407	regulation of cell-cell adhesion	0.00637295	412	PRDX2|BAD|MALT1|NFAT5|GPAM|PTPN11|CYLD|SART1|PTPN22|RC3H2|DOCK8|LAX1|CD160|SPINT2|VNN1|RPS3|TMEM131L|LGALS1|PRKCZ|IL7|CR1|SMARCD3|GPNMB|PAG1|FYN|PTPRC|ETS1|PYCARD|PDCD1LG2|TNFSF14|VCAM1|TNFSF13B|TESPA1|IL15|FGL2|RIPOR2|LYN|CD28|TGFBR2|PRKCA|MAP3K8|NLRP3|DHPS|TSPAN32|NCKAP1L|PTAFR|FSTL3|CCR2|IL10|CD80|EMILIN2|TNF|PRKCQ|CD274|NOD2|CD209|CRTAM|PPARA|VSIG4|ANXA1|PKHD1|SELE|PELI1|SLAMF1|SPN|ICOS|MBP|E…
GO:0090150	establishment of protein localization to membrane	0.00668008	256	EMC7|GET3|SGTA|CIB1|NCLN|TIMM13|EMC9|RAB11B|FIS1|SRP14|SIL1|TMEM147|DHRS1|ROMO1|RACK1|EMC10|PEX16|GRIN3B|ZDHHC12|HRAS|EMC3|EMC6|TOMM40|TIMM10|PIKFYVE|SEC61B|KRT18|NDUFB1|TRAM2|HPCA|SYNE3|SGTB|CDK5|YIF1B
GO:0030183	B cell differentiation	0.00742865	128	BAD|MALT1|ATP11C|ATM|CYLD|DOCK11|IKZF3|KIT|LGALS1|IL7|CR1|PTPRC|PRKDC|VCAM1|TNFSF13B|BTK|NOTCH2|SLAMF8|INPP5D|ITGB1|TSHR|NCKAP1L|POU2AF1|IL10|HDAC9|PLCL2|DOCK10|IRF8|ITM2A|PLCG2|FCGR2B|NFKBIZ|JAK3|PAX5|CR2|RAG1|MS4A1|CD40LG|SFRP1|ITGA4|FCRL3|GPR183|IL6|CD19
GO:0032496	response to lipopolysaccharide	0.00761036	273	PRDX2|MALT1|WDR83|RPS6KA3|NFKBIL1|ABCA1|P2RX7|SIGIRR|MIF|PTPN22|FER|TBXA2R|GFER|NAGLU|PTGER4|IL10RA|TNFAIP3|NFKBIB|RPL13A|PYCARD|PDCD1LG2|CSF2RB|TLR4|TSPO|VCAM1|STAP1|LYN|BTK|GFI1|NUGGC|PRKCA|SCIMP|NLRP3|MRC1|PTAFR|SOD2|TLR2|IL10|TNIP3|CD180|CD80|TNF|CD274|NOD2|CD96|CD68|TIFAB|SELE|PELI1|CCR5|ADAM9|IRF8|LOXL1|PLCG2|TNFRSF11A|PTGFR|CPS1|FASLG|NFKBIZ|CD86|SASH1|PDE4B|CXCL2|S100A14|GBP5|CXCL9|IDO1|I…
GO:1903050	regulation of proteolysis involved in protein catabolic process	0.00824438	218	FBXW7|SIRT6|STUB1|SGTA|UBB|ELOB|ATP5IF1|PARK7|DNAJB2|NOP53|DDRGK1|RNF19A|HSPBP1|KEAP1|DISC1|RACK1|GPX1|TMEM259|OGT|PSMC3
GO:0050766	positive regulation of phagocytosis	0.00825089	60	LMAN2|SOD1|CLEC7A|PTPRC|PYCARD|IL15|STAP1|MERTK|BTK|NCKAP1L|CAMK1D|DOCK2|FCN1|NOD2|CYBA|PLCG2|C3|FCGR2B|C4B|COLEC10|IL2RB|CCL2|SIRPG|FCN2|PTX3|C4A|SIRPB1|IL2RG
GO:0001776	leukocyte homeostasis	0.00847554	102	PRDX2|SLC39A3|SOS1|SIVA1|GPAM|P2RX7|MIF|RC3H2|DOCK11|PKN1|TNFAIP3|TNFSF14|TNFSF13B|GPR174|LYN|MERTK|BTK|NCKAP1L|CCR2|AIM2|DOCK10|ANXA1|HIF1A|HCAR2|TNFRSF17|LGALS2|IL7R|CXCR2|JAK3|IL2RA|PDE4B|FAS|RAG1|SASH3|SIT1|GPR183|IL6
GO:0016072	rRNA metabolic process	0.00887382	252	WDR18|RPS15|ERCC6|NHP2|PIH1D1|BRF1|TSR3|NOP53|YBEY|DEDD2|DDX47|BUD23|NSUN5|RPL35|SART1|RPS28|RPL14|RPS14|TBL3|RPUSD1|EXOSC5|MRM3|EXOSC4|UTP20|RRP9|POP7|KRI1|NOC4L|GTF2H5|WDR74|XRN1|TRIR|RPS19
GO:0050727	regulation of inflammatory response	0.00936531	312	PARK7|RICTOR|ATM|GPX1|CYLD|SOD1|RHBDD3|RPS19|NLRC3|NAIP|LGALS1|PTGER4|DNASE1|IL10RA|METRNL|TNFAIP3|RORA|NLRC4|SHARPIN|GSDMD|PIK3AP1|PIK3CG|FYN|RABGEF1|PTPRC|ETS1|PYCARD|TLR4|F12|LRRK2|TRADD|IL15|SUCNR1|STAP1|LYN|BTK|PTGIS|CD28|SLAMF8|CD200|BIRC3|CD200R1|NLRP3|TLR2|CCR2|IL10|TLR7|CTSC|AOAH|TNF|NOD2|IER3|PPARA|AIM2|GPER1|SYT11|ANXA1|SELE|C1QTNF12|PLA2G7|SPN|IL16|SMPDL3B|PLCG2|TNFRSF11A|NLRP1|C3|LGA…
GO:0050866	negative regulation of cell activation	0.00973354	179	PRDX2|ATM|PTPN22|RC3H2|FER|LAX1|RHBDD3|TMEM131L|PKN1|TNFAIP3|CR1|GPNMB|PAG1|RABGEF1|PTPRC|PDCD1LG2|CLNK|FGL2|RIPOR2|LYN|MERTK|BTK|CD84|PDGFRA|CD200|BANK1|INPP5D|MILR1|TSPAN32|IL10|CD274|SAMSN1|CRTAM|GPER1|SYT11|VSIG4|ANXA1|PELI1|RASSF5|SPN|TIGIT|MNDA|FCGR2B|ADAMTS18|JAK3|IL2RA|RUNX3|PLA2G2D|SFRP1|XCL1|IDO1|TBX21|UBASH3B|CTLA4|CNR1|CDKN2A|CX3CL1|VTCN1|FOXJ1|TBC1D10C|PGLYRP2
REAC:R-HSA-9609507	Protein localization	0.0104745	149	GET3|SGTA|UBB|TIMM13|FIS1|ABCD2|ACAA1|ECH1|CHCHD2|COX17|DHRS4|PEX16|CHCHD10|PEX10|TIMM44|TOMM40|TIMM10|CHCHD5|SEC61B
GO:0045619	regulation of lymphocyte differentiation	0.0107286	191	PRDX2|SOS1|BAD|MALT1|ATP11C|CYLD|SART1|PRELID1|RC3H2|SOD1|IKZF3|VNN1|TMEM131L|PRKCZ|IL7|CR1|SMARCD3|PTPRC|PRKDC|IRF4|TESPA1|JUNB|IL15|FGL2|BTK|CD28|SLAMF8|TGFBR2|INPP5D|NLRP3|NCKAP1L|CCR2|IL10|CD80|CRTAM|ANXA1|PRDM1|CAMK4|IL7R|NFKBIZ|CD86|JAK3|IL2RA|ZEB1|RUNX3|IL12RB1|RAG1|SASH3|SFRP1|FCRL3|CD2|TBX21|ZAP70|ZNF683|CTLA4|CDKN2A|BATF|CYP26B1|FOXJ1|RASGRP1|TOX|WNT10B|PGLYRP2|FOXN1|IL2RG
GO:0061136	regulation of proteasomal protein catabolic process	0.0114474	180	FBXW7|SIRT6|STUB1|UBB|ELOB|PARK7|DNAJB2|NOP53|DDRGK1|RNF19A|HSPBP1|KEAP1|RACK1|GPX1|TMEM259|OGT|PSMC3|GIPC1|UBXN1|RAD23A|PSMC5|DVL1
GO:0002292	T cell differentiation involved in immune response	0.0121935	73	MALT1|KMT2A|RC3H2|ZFPM1|PRKCZ|PTGER4|STAT4|RORA|IRF4|JUNB|FGL2|IL18R1|EOMES|SLAMF6|NLRP3|IL6R|CD80|ANXA1|LY9|SPN|NFKBIZ|CD86|JAK3|IL12RB1|RORC|CLEC4E|GPR183|TBX21|IL6
GO:0031349	positive regulation of defense response	0.0145335	413	ECSIT|OTUD4|CPTP|PARK7|NOP53|RAB11FIP2|ANKRD17|RPS6KA3|NFKBIL1|ZDHHC12|PQBP1|PTPN22|CLEC7A|TRIM11|CD160|PAK3|RPS19|NLRC3|ALPK1|NAGLU|NAIP|CTSS|MATR3|LGALS1|PTGER4|NECTIN2|TXK|TLR1|TNFAIP3|CD226|NLRC4|KLRD1|GSDMD|PIK3AP1|PIK3CG|FYN|ETS1|PYCARD|TLR4|PRKDC|CLNK|IRF4|LRRK2|TRADD|RFTN1|IRF7|IL15|SUCNR1|STAP1|LYN|TLR8|BTK|CD28|GFI1|UCN|BIRC3|SLAMF6|SCIMP|NLRP3|HSPA1A|TLR6|TLR2|CCR2|TLR7|CTSC|TNIP3|EMIL…
GO:1901800	positive regulation of proteasomal protein catabolic process	0.0156561	106	FBXW7|SIRT6|STUB1|ELOB|DNAJB2|NOP53|DDRGK1|RNF19A|HSPBP1|KEAP1|RACK1|TMEM259|PSMC3|RAD23A|PSMC5|DVL1
GO:2000060	positive regulation of ubiquitin-dependent protein catabolic process	0.0159916	99	FBXW7|SIRT6|STUB1|ELOB|DNAJB2|NOP53|DDRGK1|RNF19A|HSPBP1|KEAP1|DISC1|RACK1
GO:0002260	lymphocyte homeostasis	0.0165623	71	PRDX2|SLC39A3|SOS1|SIVA1|GPAM|P2RX7|MIF|RC3H2|DOCK11|PKN1|TNFAIP3|TNFSF14|TNFSF13B|GPR174|LYN|NCKAP1L|AIM2|DOCK10|HIF1A|TNFRSF17|LGALS2|IL7R|JAK3|IL2RA|FAS|RAG1|SASH3|SIT1
GO:0002704	negative regulation of leukocyte mediated immunity	0.0175008	50	GFER|CR1|KLRD1|RABGEF1|PTPRC|SERPINB9|CD84|NCKAP1L|CCR2|CD80|NOD2|CD96|SVEP1|SLAMF1|SPN|IL7R|FCGR2B|JAK3|CR2|KLRC1|XCL1|TBX21|FOXJ1|BST2
REAC:R-HSA-72163	mRNA Splicing - Major Pathway	0.0177733	201	SF3A2|POLR2E|XAB2|YJU2|GTF2F1|RBM42|LENG1|UBL5|POLR2I|POLR2L|SNRPD2|CCDC12|LSM3|BUD31|LSM7
GO:0040017	positive regulation of locomotion	0.0180123	535	RAPGEF2|MAP2K2|GFUS|BSG|CIB1|DAPK3|PHPT1|RHOC|RHOD|BCAR1|DDRGK1|NIPBL|SEMA6B|ATM|RACK1|EMC10|HRAS|RAB25|RRAS|FER|PDCD6|SSH2|DOCK8|HSPB1|CLEC7A|PIK3C2A|GAB1|CD151|KIT|TRIP6|SMIM22|KIF20B|DAB2|PIK3CG|TCAF2|DOCK4|GPNMB|SEMA3F|TMEM102|PTPRC|ETS1|PGF|PYCARD|CLDN7|TNFSF14|ATP8A1|TLR4|ENPP2|AGO2|TRADD|ZNF580|RIPOR2|SUCNR1|LYN|SEMA3B|PDGFRA|TGFBR2|PRKCA|ITGB1|CCR4|IL6R|TNFRSF18|NCKAP1L|PTAFR|SOD2|CCR2|CA…
GO:0002287	alpha-beta T cell activation involved in immune response	0.0186779	67	MALT1|KMT2A|RC3H2|ZFPM1|PRKCZ|PTGER4|STAT4|RORA|IRF4|JUNB|IL18R1|EOMES|SLAMF6|NLRP3|IL6R|CD80|ANXA1|LY9|SPN|NFKBIZ|CD86|JAK3|IL12RB1|RORC|GPR183|TBX21|IL6
GO:0002293	alpha-beta T cell differentiation involved in immune response	0.0186779	67	MALT1|KMT2A|RC3H2|ZFPM1|PRKCZ|PTGER4|STAT4|RORA|IRF4|JUNB|IL18R1|EOMES|SLAMF6|NLRP3|IL6R|CD80|ANXA1|LY9|SPN|NFKBIZ|CD86|JAK3|IL12RB1|RORC|GPR183|TBX21|IL6
GO:0071219	cellular response to molecule of bacterial origin	0.0187889	178	PRDX2|MALT1|NFKBIL1|ABCA1|SIGIRR|MIF|PTPN22|TBXA2R|GFER|TLR1|TNFAIP3|NFKBIB|PYCARD|PDCD1LG2|TLR4|TSPO|STAP1|LYN|GFI1|NUGGC|PRKCA|SCIMP|NLRP3|MRC1|TLR6|PTAFR|TLR2|IL10|TNIP3|CD180|CD80|TNF|CD274|NOD2|CD68|TIFAB|CCR5|ADAM9|IRF8|PLCG2|FCGR2B|NFKBIZ|CD86|SASH1|PDE4B|CXCL2|GBP5|CXCL9|IL24|IL6|CCL2|MMP3|GBP3|CD6|CXCL11|TLR10|CXCL10|CX3CL1
GO:0002706	regulation of lymphocyte mediated immunity	0.0195538	148	MALT1|RIF1|P2RX7|ATAD5|CD160|GFER|PRKCZ|NECTIN2|CD226|CR1|KLRD1|PTPRC|SERPINB9|CLNK|TRPM4|IL18R1|BTK|CD28|SLAMF6|NLRP3|NCKAP1L|CCR2|IL10|CD80|TNF|NOD2|APLF|CD96|CRTAM|IL18RAP|SVEP1|SLAMF1|SPN|C3|IL7R|FCGR2B|CR2|SH2D1A|KLRC1|TFRC|IL12RB1|SASH3|XCL1|SH2D1B|IL1R1|TBX21|IL6|LTA|KLRB1|FOXJ1|RASGRP1
GO:0097190	apoptotic signaling pathway	0.0212497	558	FBXW7|PRDX2|CIB1|DAPK3|UBB|NDUFS3|ERCC6|BAD|ATP5IF1|PARK7|ZNF205|APAF1|PIH1D1|COA8|FNIP2|FIS1|STK11|LMNA|FAM162A|BBC3|SIVA1|ATM|DEDD2|RACK1|DDX47|GPX1|CYLD|HRAS|CHCHD10|PRELID1|P2RX7|KRT8|IFI27L1|ATAD5|TFPT|BIRC6|MKNK2|KDM6A|MIF|RHOT2|SOD1|KRT18|CASP8AP2|ERP29|PDCD6|CFLAR|TPT1|DAPK1|TNFRSF12A
GO:0009260	ribonucleotide biosynthetic process	0.0215874	199	ATP5F1D|NDUFS7|NDUFB10|NDUFA2|UQCC3|NDUFS3|ANTKMT|NDUFS6|NME3|NDUFB7|GUK1|NDUFS8|NDUFB2|NDUFA3|SLC25A1|ATP5PF|ATP5ME|TECR|NDUFB11|ATP5MC2|ACSL4|NME4|NDUFB1|ATP5MC1|NDUFB4|NDUFA1|ATP5PO|IMPDH2|NDUFS5|GUCY1A1|AK1|ATP5PD|NME1|ADCY7|AMPD3|ATP5F1E|ATP5MF|APRT
REAC:R-HSA-2262752	Cellular responses to stress	0.0217359	701	PRDX2|RPS15|COX6B1|UBB|MYDGF|ELOB|RPL36AL|PSMB6|LAMTOR2|FNIP2|RPLP1|LMNA|RPL28|LAMTOR4|YIF1A|RPL18|RPL26L1|FAU|TNRC6B|ATM|MLST8|KEAP1|NPRL3|COX5B|GPX1|RPS6KA3|RPL35|NPRL2|RPS9|RPS28|ANAPC11|PSMC3|AGO3|COX7C|RPL24|RPL14|RPS14|EXOSC5|AGO4|TXN2|COX4I1|SCO2|RPL36|COX5A|AKT1S1|EXOSC4|COX8A|PSMC5|SOD1|ATP6V0B|TUBB4B|RPL29|RPL32|RPS2|CHD9|CCS|BLVRB|RPS5|RPL8|ANAPC15|RPS19BP1|PSMA2|ATOX1|H2AJ|KPTN|RPS19|…
REAC:R-HSA-72172	mRNA Splicing	0.0267765	208	SF3A2|POLR2E|XAB2|YJU2|GTF2F1|RBM42|LENG1|UBL5|POLR2I|POLR2L|SNRPD2|CCDC12|LSM3|BUD31|LSM7
GO:0045862	positive regulation of proteolysis	0.0280129	298	FBXW7|SIRT6|STUB1|AURKAIP1|ELOB|BAD|ATP5IF1|APAF1|MALT1|FIS1|DNAJB2|NOP53|FAM162A|DDRGK1|BBC3|RNF19A|HSPBP1|KEAP1|DISC1|RACK1|TMEM259|OGT|PSMC3
GO:2000147	positive regulation of cell motility	0.0282364	522	RAPGEF2|MAP2K2|GFUS|BSG|CIB1|DAPK3|PHPT1|RHOC|RHOD|BCAR1|DDRGK1|NIPBL|SEMA6B|ATM|RACK1|EMC10|HRAS|RAB25|RRAS|FER|PDCD6|SSH2|DOCK8|HSPB1|CLEC7A|PIK3C2A|GAB1|CD151|KIT|TRIP6|SMIM22|KIF20B|DAB2|PIK3CG|TCAF2|DOCK4|GPNMB|SEMA3F|TMEM102|PTPRC|ETS1|PGF|PYCARD|CLDN7|TNFSF14|ATP8A1|TLR4|ENPP2|AGO2|TRADD|ZNF580|RIPOR2|LYN|SEMA3B|PDGFRA|TGFBR2|PRKCA|ITGB1|IL6R|TNFRSF18|NCKAP1L|PTAFR|SOD2|CCR2|CASS4|CAMK1D|H…
GO:0050729	positive regulation of inflammatory response	0.0285205	122	PARK7|RPS19|NAIP|LGALS1|PTGER4|NLRC4|GSDMD|PIK3CG|ETS1|PYCARD|TLR4|LRRK2|TRADD|IL15|SUCNR1|STAP1|BTK|CD28|NLRP3|TLR2|CCR2|TLR7|CTSC|TNF|AIM2|PLA2G7|IL16|PLCG2|TNFRSF11A|NLRP1|C3|LGALS2|NFKBIZ|LPL|IL33|IL1RL1|IDO1|IL6|CCR7|LTA|CNR1|CX3CL1|PTGS2|AGTR1|AGT
GO:0071826	protein-RNA complex organization	0.0310774	203	SF3A2|RPS15|XAB2|EIF3G|RUVBL2|YJU2|DNAJC17|PIH1D1|SNRPD2|NOP53|ATM|SART1|MDN1|RPS28|SF3B5|AGO3|RPL24|MRPL20|RPS14|AGO4|CELF2|SETX|EIF3K|TSSC4
GO:0002833	positive regulation of response to biotic stimulus	0.0315881	324	ECSIT|OTUD4|CPTP|NOP53|RAB11FIP2|ANKRD17|RPS6KA3|NFKBIL1|ZDHHC12|PQBP1|MIF|PTPN22|CLEC7A|TRIM11|CD160|PAK3|RPS19|NLRC3|ALPK1|NAGLU|NAIP|CTSS|MATR3|NECTIN2|TXK|TLR1|TNFAIP3|CD226|NLRC4|KLRD1|PIK3AP1|FYN|PYCARD|TLR4|PRKDC|CLNK|IRF4|RFTN1|IRF7|LYN|TLR8|BTK|GFI1|BIRC3|PRKCA|SLAMF6|SCIMP|NLRP3|HSPA1A|TLR6|TLR2|TLR7|TNIP3|CD180|EMILIN2|TNF|LGR4|CD274|FCN1|NOD2|MED1|CRTAM|AIM2|IL18RAP|PELI1|IFI16|NLRC5|…
GO:0042093	T-helper cell differentiation	0.0320196	65	MALT1|KMT2A|RC3H2|ZFPM1|PRKCZ|PTGER4|STAT4|RORA|IRF4|JUNB|IL18R1|SLAMF6|NLRP3|IL6R|CD80|ANXA1|LY9|SPN|NFKBIZ|CD86|JAK3|IL12RB1|RORC|GPR183|TBX21|IL6
GO:0030595	leukocyte chemotaxis	0.0322699	200	BSG|PPIB|LYST|PIKFYVE|MIF|RPS19|KIT|MSMP|PIK3CG|TMEM102|RPL13A|PGF|TNFSF14|ADGRE2|TRPM4|ZNF580|RIPOR2|STAP1|LYN|SLAMF8|IL6R|NCKAP1L|CCR2|IL10|GPR18|CAMK1D|CYP7B1|NOD2|ANXA1|NBL1|PLA2G7|CCR5|SLAMF1|CSF3R|IL16|CMKLR1|TNFRSF11A|SLC12A2|VEGFD|CXCR2|CCL4|PDE4B|DPP4|XCL2|CXCL12|CCL8|CCR1|CXCL2|S100A14|XCL1|CXCL9|GPR183|IL6|CCR7|CCL2|CCL13|CCL18|JAML|PTPRO|CXCL11|CXCL10|CX3CL1|TGFB2|CCL11|CCL5
GO:0045087	innate immune response	0.0330289	749	TMED1|ECSIT|UBL7|DAPK3|CDC37|OTUD4|CPTP|NR1H2|MALT1|NOP53|FAU|RAB11FIP2|ANKRD17|PTPN11|RPS6KA3|CYLD|NFKBIL1|ZDHHC12|LYST|PQBP1|MIF|PTPN22|ATAD3A|TUBB4B|DAPK1|CLEC7A|SENP7|TRIM11|CD160|PAK3|RPS19|NLRC3|GFER|VNN1|PTK6|RNASET2|ALPK1|NAGLU|NAIP|CTSS|MATR3|NECTIN2|TXK|TLR1|TNFAIP3|ANG|CD226|NLRC4|CR1|KLRD1|GSDMD|PIK3AP1|PIK3CG|TRIM22|RPL13A|FYN|SERPINB9|PYCARD|TLR4|PRKDC|CLNK|F12|IRF4|SLAMF7|RFTN1|CYB…
GO:0071887	leukocyte apoptotic process	0.0332807	110	RAPGEF2|BBC3|SIVA1|GPAM|PRELID1|P2RX7|MIF|DOCK8|PKN1|GIMAP8|IRF7|LYN|MERTK|BTK|CD3G|IL10|PRKCQ|CD274|NOD2|ANXA1|HIF1A|HCAR2|CCR5|FASLG|IL7R|CXCR2|NFKBIZ|JAK3|IL2RA|CXCL12|FAS|RAG1|RORC|BCL11B|IDO1|PIP|IL6|CCR7
REAC:R-HSA-8953897	Cellular responses to stimuli	0.0333982	710	PRDX2|RPS15|COX6B1|UBB|MYDGF|ELOB|RPL36AL|PSMB6|LAMTOR2|FNIP2|RPLP1|LMNA|RPL28|LAMTOR4|YIF1A|RPL18|RPL26L1|FAU|TNRC6B|ATM|MLST8|KEAP1|NPRL3|COX5B|GPX1|RPS6KA3|RPL35|NPRL2|RPS9|RPS28|ANAPC11|PSMC3|AGO3|COX7C|RPL24|RPL14|RPS14|EXOSC5|AGO4|TXN2|COX4I1|SCO2|RPL36|COX5A|AKT1S1|EXOSC4|COX8A|PSMC5|SOD1|ATP6V0B|TUBB4B|RPL29|RPL32|RPS2|CHD9|CCS|BLVRB|RPS5|RPL8|ANAPC15|RPS19BP1|PSMA2|ATOX1|H2AJ|KPTN|RPS19|…
GO:2000106	regulation of leukocyte apoptotic process	0.0350266	83	RAPGEF2|BBC3|GPAM|PRELID1|P2RX7|MIF|DOCK8|GIMAP8|IRF7|LYN|MERTK|BTK|CD3G|IL10|PRKCQ|CD274|NOD2|ANXA1|HIF1A|HCAR2|CCR5|IL7R|CXCR2|JAK3|CXCL12|RAG1|RORC|BCL11B|IDO1|PIP|CCR7
GO:0051250	negative regulation of lymphocyte activation	0.0351027	136	PRDX2|ATM|PTPN22|RC3H2|LAX1|RHBDD3|TMEM131L|PKN1|TNFAIP3|CR1|GPNMB|PAG1|PDCD1LG2|CLNK|FGL2|RIPOR2|LYN|MERTK|BTK|BANK1|INPP5D|TSPAN32|IL10|CD274|SAMSN1|CRTAM|VSIG4|ANXA1|PELI1|RASSF5|SPN|TIGIT|MNDA|FCGR2B|JAK3|IL2RA|RUNX3|PLA2G2D|SFRP1|XCL1|IDO1|TBX21|CTLA4|CDKN2A|VTCN1|FOXJ1|TBC1D10C|PGLYRP2
GO:0032613	interleukin-10 production	0.0356256	51	CLEC7A|PRKCZ|PYCARD|PDCD1LG2|TLR4|IRF4|BTK|CD28|ISG15|TLR2|CD274|NOD2|PLCG2|TIGIT|FCGR2B|JAK3|HGF|CD40LG|SASH3|XCL1|IDO1|IL6
GO:0032653	regulation of interleukin-10 production	0.0356256	51	CLEC7A|PRKCZ|PYCARD|PDCD1LG2|TLR4|IRF4|BTK|CD28|ISG15|TLR2|CD274|NOD2|PLCG2|TIGIT|FCGR2B|JAK3|HGF|CD40LG|SASH3|XCL1|IDO1|IL6
GO:1902105	regulation of leukocyte differentiation	0.0362913	284	FBXW7|PRDX2|SOS1|BAD|MALT1|ATP11C|GPR137|CYLD|SART1|PRELID1|RC3H2|SOD1|ZFPM1|IKZF3|QKI|VNN1|TMEM131L|PRKCZ|IL7|CR1|SMARCD3|RASSF2|PTPRC|TLR4|PRKDC|IRF4|TESPA1|IRF7|JUNB|IL15|FGL2|LYN|BTK|NOTCH2|CD28|SLAMF8|TGFBR2|INPP5D|PRKCA|NLRP3|NCKAP1L|FSTL3|CCR2|IL10|CD80|TNF|CRTAM|ANXA1|PRDM1|EVI2B|CAMK4|TNFRSF11A|IL7R|FCGR2B|NFKBIZ|CD86|JAK3|IL2RA|ZEB1|RUNX3|CD4|IL12RB1|RAG1|CCR1|GPR55|CDK6|SASH3|SFRP1|PPA…
GO:0071345	cellular response to cytokine stimulus	0.0371362	712	AGPAT2|CIB1|DAPK3|CDC37|SOS1|OTUD4|BAD|NR1H2|TXNDC17|CDC34|RIF1|NFAT5|KEAP1|CBL|PTPN11|CYLD|ABCA1|GIPC1|SMPD4|KRT8|SIGIRR|MYLK3|KRT18|FER|SPPL2B|BCAT2|GPR75|DAPK1|DOCK8|EIF5A|GFER|RPS3|SRM|IMPDH2|KIT|NAIP|RPL3|LEPR|IL10RA|TXK|TNFAIP3|CCR8|STAT4|IL7|RORA|SHARPIN|TRAF1|RPL13A|MIB2|RABGEF1|PTPRC|PYCARD|CSF2RB|TLR4|RPS16|ARID5B|VCAM1|CNTF|MFAP3|TNFSF13B|LRRK2|BRCA1|NR5A2|TRADD|PTP4A3|IRF7|IL15|RIPOR2…
GO:0097553	calcium ion transmembrane import into cytosol	0.0374964	163	BBC3|P2RX7|TRPC1|SCN11A|PKD2|ANK2|SLC8A1|RYR2|CHD7|CLIC2|SCN9A|SCN3A|FYN|PTPRC|LYN|NOL3|DMD|PLCB4|PLCB2|SLC24A4|GPER1|CAMK2D|SCN2A|MCOLN2|CCR5|P2RX1|AKAP6|CYBA|PLCG2|XCR1|FASLG|SCN8A|HTR2B|LCK|PLCB1|RYR3|MS4A1|MCOLN3|XCL1|CXCL9|TMEM38B|DRD2|CD19|CCR7|UBASH3B|CACNA2D1|CXCR3|GP1BA|CXCL11|CXCL10|CX3CL1|GRIN2A|SCN7A|PLCH1
GO:0051282	regulation of sequestering of calcium ion	0.0398893	121	BBC3|MTLN|P2RX7|TRPC1|PKD2|ANK2|SLC8A1|RYR2|CHD7|CLIC2|PTPRC|LYN|NOL3|DMD|PLCB4|PLCB2|GPER1|CAMK2D|MCOLN2|CCR5|AKAP6|CYBA|PLCG2|XCR1|FASLG|HTR2B|LCK|PLCB1|RYR3|MCOLN3|XCL1|CXCL9|TMEM38B|DRD2|CD19|CCR7|UBASH3B|CXCR3|GP1BA|CXCL11|CXCL10|CX3CL1|PLCH1
GO:0022618	protein-RNA complex assembly	0.0410232	193	SF3A2|RPS15|XAB2|EIF3G|RUVBL2|YJU2|PIH1D1|SNRPD2|NOP53|ATM|SART1|MDN1|RPS28|SF3B5|AGO3|RPL24|MRPL20|RPS14|AGO4|CELF2|SETX|EIF3K|TSSC4
GO:0030155	regulation of cell adhesion	0.0412147	696	GFUS|PRDX2|CIB1|DAPK3|PPP1R12A|BAD|MALT1|RHOD|NFAT5|ATM|GPAM|DISC1|PTPN11|CYLD|SART1|RRAS|PTPN22|RC3H2|PDE3B|DOCK8|CAMSAP3|PEAK1|LAX1|ROCK1|CD160|PRKX|SPINT2|VNN1|RPS3|TMEM131L|LGALS1|PRKCZ|JUP|DAB2|RAC3|IL7|CR1|SMARCD3|PIK3CG|GPNMB|TMEM102|PAG1|FYN|CHRD|PTPRC|ETS1|JAG2|PYCARD|PDCD1LG2|CLDN7|TNFSF14|VIT|VCAM1|TNFSF13B|TESPA1|IL15|FGL2|RIPOR2|LYN|OLFM4|CD28|ADAM22|DMD|PLXNC1|APBB1IP|MUC1|TGFBR2|PR…
GO:0046390	ribose phosphate biosynthetic process	0.0434285	205	ATP5F1D|NDUFS7|NDUFB10|NDUFA2|UQCC3|NDUFS3|ANTKMT|NDUFS6|NME3|NDUFB7|GUK1|NDUFS8|NDUFB2|NDUFA3|SLC25A1|ATP5PF|ATP5ME|TECR|NDUFB11|ATP5MC2|ACSL4|NME4|NDUFB1|ATP5MC1|NDUFB4|NDUFA1|ATP5PO|IMPDH2|NDUFS5|GUCY1A1|AK1|ATP5PD|NME1|ADCY7|AMPD3|ATP5F1E|ATP5MF|APRT
GO:0002294	CD4-positive, alpha-beta T cell differentiation involved in immune response	0.0439343	66	MALT1|KMT2A|RC3H2|ZFPM1|PRKCZ|PTGER4|STAT4|RORA|IRF4|JUNB|IL18R1|SLAMF6|NLRP3|IL6R|CD80|ANXA1|LY9|SPN|NFKBIZ|CD86|JAK3|IL12RB1|RORC|GPR183|TBX21|IL6
GO:0032635	interleukin-6 production	0.0445539	132	BSG|PTPN11|P2RX7|PTPN22|CLEC7A|NLRC3|ZBTB20|TLR1|TNFAIP3|RABGEF1|PYCARD|TLR4|TLR8|BTK|CD84|UCN|CD200|BANK1|INPP5D|CD200R1|SCIMP|IL6R|TLR6|NCKAP1L|POU2AF1|PTAFR|TLR2|IL10|TLR7|TNF|NOD2|SYT11|SLAMF1|IL16|MBP|CYBA|PLCG2|EREG|HGF|LPL|IL33
GO:0032675	regulation of interleukin-6 production	0.0445539	132	BSG|PTPN11|P2RX7|PTPN22|CLEC7A|NLRC3|ZBTB20|TLR1|TNFAIP3|RABGEF1|PYCARD|TLR4|TLR8|BTK|CD84|UCN|CD200|BANK1|INPP5D|CD200R1|SCIMP|IL6R|TLR6|NCKAP1L|POU2AF1|PTAFR|TLR2|IL10|TLR7|TNF|NOD2|SYT11|SLAMF1|IL16|MBP|CYBA|PLCG2|EREG|HGF|LPL|IL33
REAC:R-HSA-72695	Formation of the ternary complex, and subsequently, the 43S complex	0.047309	50	RPS15|EIF3G|FAU|RPS9|RPS28|RPS14|EIF3K|RPS2|RPS5|RPS19|RPS3|RPS27L|RPS8|RPS16|RPS11
GO:0033077	T cell differentiation in thymus	0.0475414	78	SOS1|STK11|SOD1|VNN1|TMEM131L|PTPRC|JAG2|PRKDC|TESPA1|CD28|CD3G|PRR7|DOCK2|SPN|CAMK4|IL7R|TNFRSF9|ZEB1|RAG1|CDK6|BCL11B|CD3E|ZAP70|CCR7|FZD7|CDKN2A|FOXJ1|RASGRP1|TOX|CD3D|FOXN1|IL2RG
GO:0051209	release of sequestered calcium ion into cytosol	0.0475414	118	BBC3|P2RX7|TRPC1|PKD2|ANK2|SLC8A1|RYR2|CHD7|CLIC2|PTPRC|LYN|NOL3|DMD|PLCB4|PLCB2|GPER1|CAMK2D|MCOLN2|CCR5|AKAP6|CYBA|PLCG2|XCR1|FASLG|HTR2B|LCK|PLCB1|RYR3|MCOLN3|XCL1|CXCL9|TMEM38B|DRD2|CD19|CCR7|UBASH3B|CXCR3|GP1BA|CXCL11|CXCL10|CX3CL1|PLCH1
GO:0006364	rRNA processing	0.0479829	214	WDR18|RPS15|NHP2|PIH1D1|TSR3|NOP53|YBEY|DDX47|BUD23|NSUN5|RPL35|SART1|RPS28|RPL14|RPS14|TBL3|RPUSD1|EXOSC5|MRM3|EXOSC4|UTP20|RRP9|POP7|KRI1|NOC4L|GTF2H5|WDR74|RPS19

## Sheet: METTL14_Basal_q25vs25
term_id	term_name	adjusted_p_val	term_size	overlap
REAC:R-HSA-2408557	Selenocysteine synthesis	2.06853e-14	90	SEPSECS|RPL13|RPL35|RPS16|EEFSEC|RPL14|RPS15|RPL18|RPL36|FAU|RPS19|RPS2|RPL24|RPS28|RPS9|RPL28|RPL29|RPS8|RPS3|RPL18A|RPL12|RPL8|RPL37|RPLP2|RPL11|RPL32|RPS25|RPL27A|RPS24|UBA52|RPL37A|RPL5|RPL35A|RPS6|RPS20|RPS11|RPL13A|RPS7|RPSA|RPL30|RPS21|RPL38|RPLP1|RPL3|RPL31|RPL4|RPS18|RPL27|RPS5|RPL10|RPS14|RPL7A|RPL39
REAC:R-HSA-156902	Peptide chain elongation	5.69486e-14	86	RPL13|RPL35|RPS16|RPL14|RPS15|RPL18|RPL36|FAU|RPS19|RPS2|RPL24|RPS28|RPS9|RPL28|RPL29|RPS8|RPS3|RPL18A|RPL12|RPL8|RPL37|RPLP2|RPL11|RPL32|RPS25|RPL27A|RPS24|UBA52|RPL37A|RPL5|RPL35A|RPS6|RPS20|RPS11|RPL13A|RPS7|RPSA|RPL30|RPS21|RPL38|RPLP1|RPL3|RPL31|RPL4|RPS18|RPL27|RPS5|RPL10|RPS14|RPL7A|RPL39
REAC:R-HSA-192823	Viral mRNA Translation	5.69486e-14	86	RPL13|RPL35|RPS16|RPL14|RPS15|RPL18|RPL36|FAU|RPS19|RPS2|RPL24|RPS28|RPS9|RPL28|RPL29|RPS8|RPS3|RPL18A|RPL12|RPL8|RPL37|RPLP2|RPL11|RPL32|RPS25|RPL27A|RPS24|UBA52|RPL37A|RPL5|RPL35A|RPS6|RPS20|RPS11|RPL13A|RPS7|RPSA|RPL30|RPS21|RPL38|RPLP1|RPL3|RPL31|RPL4|RPS18|RPL27|RPS5|RPL10|RPS14|RPL7A|RPL39
REAC:R-HSA-156842	Eukaryotic Translation Elongation	6.80665e-14	89	RPL13|RPL35|RPS16|RPL14|RPS15|RPL18|RPL36|FAU|RPS19|RPS2|RPL24|RPS28|RPS9|RPL28|RPL29|RPS8|RPS3|RPL18A|RPL12|RPL8|RPL37|RPLP2|RPL11|EEF1D|RPL32|RPS25|RPL27A|RPS24|UBA52|RPL37A|RPL5|RPL35A|RPS6|RPS20|RPS11|RPL13A|RPS7|RPSA|RPL30|RPS21|RPL38|RPLP1|RPL3|RPL31|RPL4|RPS18|RPL27|RPS5|RPL10|RPS14|RPL7A|RPL39
REAC:R-HSA-9633012	Response of EIF2AK4 (GCN2) to amino acid deficiency	5.82085e-13	98	RPL13|RPL35|RPS16|RPL14|RPS15|RPL18|RPL36|FAU|RPS19|RPS2|RPL24|RPS28|RPS9|RPL28|RPL29|RPS8|RPS3|RPL18A|RPL12|RPL8|RPL37|RPLP2|DDIT3|RPL11|RPL32|RPS25|RPL27A|RPS24|UBA52|RPL37A|RPL5|RPL35A|RPS6|RPS20|RPS11|RPL13A|IMPACT|RPS7|CEBPB|RPSA|RPL30|RPS21|RPL38|RPLP1|RPL3|RPL31|RPL4|RPS18|RPL27|RPS5|RPL10|RPS14|RPL7A|RPL39
REAC:R-HSA-72764	Eukaryotic Translation Termination	8.1693e-13	90	RPL13|RPL35|RPS16|RPL14|RPS15|RPL18|RPL36|FAU|RPS19|RPS2|RPL24|RPS28|RPS9|RPL28|RPL29|RPS8|RPS3|RPL18A|RPL12|RPL8|RPL37|RPLP2|RPL11|RPL32|RPS25|RPL27A|RPS24|UBA52|RPL37A|RPL5|RPL35A|RPS6|RPS20|RPS11|RPL13A|RPS7|RPSA|RPL30|RPS21|RPL38|RPLP1|RPL3|RPL31|RPL4|RPS18|RPL27|RPS5|RPL10|RPS14|RPL7A|RPL39
REAC:R-HSA-975956	Nonsense Mediated Decay (NMD) independent of the Exon Junction Complex (EJC)	2.83505e-12	92	RPL13|RPL35|RPS16|RPL14|RPS15|RPL18|RPL36|FAU|RPS19|RPS2|RPL24|RPS28|RPS9|RPL28|RPL29|RPS8|RPS3|RPL18A|RPL12|RPL8|RPL37|RPLP2|RPL11|RPL32|RPS25|RPL27A|RPS24|UBA52|RPL37A|RPL5|RPL35A|RPS6|RPS20|RPS11|RPL13A|RPS7|RPSA|RPL30|RPS21|RPL38|RPLP1|RPL3|RPL31|RPL4|RPS18|RPL27|RPS5|RPL10|RPS14|RPL7A|RPL39
REAC:R-HSA-72689	Formation of a pool of free 40S subunits	3.21992e-12	98	RPL13|RPL35|RPS16|EIF3G|RPL14|RPS15|RPL18|RPL36|EIF3K|FAU|RPS19|RPS2|RPL24|RPS28|RPS9|RPL28|RPL29|RPS8|RPS3|RPL18A|RPL12|RPL8|RPL37|RPLP2|RPL11|RPL32|RPS25|RPL27A|RPS24|UBA52|RPL37A|RPL5|RPL35A|RPS6|RPS20|RPS11|RPL13A|RPS7|RPSA|RPL30|RPS21|RPL38|RPLP1|RPL3|RPL31|RPL4|RPS18|RPL27|RPS5|RPL10|RPS14|RPL7A|RPL39
REAC:R-HSA-156827	L13a-mediated translational silencing of Ceruloplasmin expression	9.97052e-11	108	RPL13|RPL35|RPS16|EIF3G|RPL14|RPS15|RPL18|RPL36|EIF3K|FAU|RPS19|RPS2|RPL24|RPS28|RPS9|EIF4E|RPL28|RPL29|RPS8|RPS3|RPL18A|RPL12|RPL8|RPL37|RPLP2|RPL11|RPL32|RPS25|RPL27A|RPS24|UBA52|RPL37A|RPL5|RPL35A|RPS6|RPS20|RPS11|RPL13A|RPS7|RPSA|RPL30|RPS21|RPL38|RPLP1|RPL3|RPL31|RPL4|RPS18|RPL27|RPS5|RPL10
REAC:R-HSA-168273	Influenza Viral RNA Transcription and Replication	1.18503e-10	129	RPL13|RPL35|RPS16|SEC13|RPL14|RPS15|RPL18|POLR2F|POLR2I|RPL36|FAU|RPS19|RPS2|POLR2J|RPL24|RPS28|RANBP2|RPS9|RPL28|RPL29|RPS8|RPS3|POLR2E|RPL18A|RPL12|RPL8|RPL37|RPLP2|RPL11|RPL32|RPS25|NUP153|RPL27A|RPS24|UBA52|RPL37A|RPL5|RPL35A|RPS6|RPS20|RPS11|RPL13A|RPS7|RPSA|RPL30|POLR2H|RPS21|RPL38|RPLP1|RPL3|RPL31|RPL4|RPS18|RPL27|RPS5|POLR2L|RPL10
REAC:R-HSA-168255	Influenza Infection	1.26514e-10	147	RPL13|RPL35|RPS16|SEC13|RPL14|CLTC|RPS15|RPL18|POLR2F|POLR2I|RPL36|FAU|RPS19|RPS2|POLR2J|RPL24|RPS28|CPSF4|RANBP2|RPS9|RPL28|RPL29|RPS8|RPS3|POLR2E|RPL18A|RPL12|RPL8|RPL37|RPLP2|EIF2AK2|RPL11|RPL32|RPS25|NUP153|RPL27A|RPS24|UBA52|RPL37A|RPL5|RPL35A|RPS6|RPS20|RPS11|RPL13A|RPS7|CALR|RPSA|RPL30|POLR2H|RPS21|RPL38|SLC25A6|RPLP1|RPL3|RPL31|RPL4|RPS18|RPL27|RPS5|POLR2L|RPL10
REAC:R-HSA-72706	GTP hydrolysis and joining of the 60S ribosomal subunit	1.58089e-10	109	RPL13|RPL35|RPS16|EIF3G|RPL14|RPS15|RPL18|RPL36|EIF3K|FAU|RPS19|RPS2|RPL24|RPS28|RPS9|EIF4E|RPL28|RPL29|RPS8|RPS3|RPL18A|RPL12|RPL8|RPL37|RPLP2|RPL11|RPL32|RPS25|RPL27A|RPS24|UBA52|RPL37A|RPL5|RPL35A|RPS6|RPS20|RPS11|RPL13A|RPS7|RPSA|RPL30|RPS21|RPL38|RPLP1|RPL3|RPL31|RPL4|RPS18|RPL27|RPS5|RPL10
REAC:R-HSA-9711097	Cellular response to starvation	3.74665e-10	149	RPL13|FNIP1|RPL35|RPS16|SEC13|LAMTOR4|RPL14|NPRL3|RPS15|RPL18|RPL36|FAU|RPS19|RPS2|KPTN|RPL24|RPS28|RPS9|RPL28|RPL29|RPS8|RPS3|RPL18A|RPL12|RPL8|RPL37|RPLP2|FNIP2|DDIT3|RPL11|RPL32|SLC38A9|RPS25|RPL27A|RPS24|UBA52|RPL37A|RPL5|RPL35A|MLST8|RPS6|RPS20|RPS11|RPL13A|IMPACT|RPS7|CEBPB|ATP6V1A|RPSA|RPL30|RPS21|RPL38|RPLP1|RPL3|RPL31|RPL4|ATP6V1C1|RPS18|RPL27|RPS5|RPL10|LAMTOR2
REAC:R-HSA-927802	Nonsense-Mediated Decay (NMD)	6.02809e-10	112	SMG1|RPL13|RPL35|RPS16|RPL14|RPS15|RPL18|RPL36|SMG8|FAU|RPS19|RPS2|RPL24|RPS28|RPS9|RPL28|RPL29|RPS8|RPS3|RPL18A|RPL12|RPL8|RPL37|RPLP2|RPL11|RPL32|RPS25|RPL27A|RPS24|UBA52|RPL37A|RPL5|RPL35A|RPS6|RPS20|RPS11|RPL13A|RPS7|MAGOH|RPSA|RPL30|RPS21|RPL38|RPLP1|RPL3|RPL31|RPL4|RPS18|RPL27|RPS5|RPL10
REAC:R-HSA-975957	Nonsense Mediated Decay (NMD) enhanced by the Exon Junction Complex (EJC)	6.02809e-10	112	SMG1|RPL13|RPL35|RPS16|RPL14|RPS15|RPL18|RPL36|SMG8|FAU|RPS19|RPS2|RPL24|RPS28|RPS9|RPL28|RPL29|RPS8|RPS3|RPL18A|RPL12|RPL8|RPL37|RPLP2|RPL11|RPL32|RPS25|RPL27A|RPS24|UBA52|RPL37A|RPL5|RPL35A|RPS6|RPS20|RPS11|RPL13A|RPS7|MAGOH|RPSA|RPL30|RPS21|RPL38|RPLP1|RPL3|RPL31|RPL4|RPS18|RPL27|RPS5|RPL10
REAC:R-HSA-1799339	SRP-dependent cotranslational protein targeting to membrane	7.27412e-10	109	RPL13|RPL35|RPS16|RPL14|RPS15|RPL18|RPL36|FAU|RPS19|RPS2|RPL24|RPS28|RPS9|RPL28|RPL29|RPS8|RPS3|RPL18A|RPL12|RPL8|RPL37|RPLP2|SSR4|RPL11|RPL32|RPS25|RPL27A|SEC61B|RPS24|UBA52|RPL37A|RPL5|RPL35A|RPS6|RPS20|RPS11|RPL13A|RPS7|RPSA|RPL30|RPS21|RPL38|RPLP1|RPL3|RPL31|RPL4|RPS18|RPL27|RPS5|RPL10
REAC:R-HSA-72613	Eukaryotic Translation Initiation	7.59749e-10	116	RPL13|RPL35|RPS16|EIF3G|RPL14|RPS15|RPL18|RPL36|EIF3K|FAU|RPS19|RPS2|RPL24|RPS28|RPS9|EIF4E|RPL28|RPL29|RPS8|RPS3|RPL18A|RPL12|RPL8|RPL37|RPLP2|RPL11|RPL32|RPS25|RPL27A|RPS24|UBA52|RPL37A|EIF4EBP1|RPL5|RPL35A|RPS6|RPS20|RPS11|RPL13A|RPS7|RPSA|RPL30|RPS21|RPL38|RPLP1|RPL3|RPL31|RPL4|RPS18|RPL27|RPS5|RPL10
REAC:R-HSA-72737	Cap-dependent Translation Initiation	7.59749e-10	116	RPL13|RPL35|RPS16|EIF3G|RPL14|RPS15|RPL18|RPL36|EIF3K|FAU|RPS19|RPS2|RPL24|RPS28|RPS9|EIF4E|RPL28|RPL29|RPS8|RPS3|RPL18A|RPL12|RPL8|RPL37|RPLP2|RPL11|RPL32|RPS25|RPL27A|RPS24|UBA52|RPL37A|EIF4EBP1|RPL5|RPL35A|RPS6|RPS20|RPS11|RPL13A|RPS7|RPSA|RPL30|RPS21|RPL38|RPLP1|RPL3|RPL31|RPL4|RPS18|RPL27|RPS5|RPL10
REAC:R-HSA-2408522	Selenoamino acid metabolism	9.26289e-10	113	SEPSECS|RPL13|RPL35|RPS16|EEFSEC|RPL14|RPS15|RPL18|RPL36|FAU|RPS19|RPS2|RPL24|RPS28|RPS9|RPL28|RPL29|RPS8|RPS3|RPL18A|RPL12|RPL8|RPL37|RPLP2|RPL11|RPL32|RPS25|RPL27A|TXNRD1|RPS24|UBA52|RPL37A|RPL5|RPL35A|RPS6|RPS20|RPS11|RPL13A|RPS7|RPSA|RPL30|RPS21|RPL38|RPLP1|RPL3|RPL31|RPL4|RPS18|RPL27|RPS5|RPL10
REAC:R-HSA-6791226	Major pathway of rRNA processing in the nucleolus and cytosol	1.70022e-09	177	BUD23|UTP20|EXOSC7|RPL13|RRP1|RRP9|RPL35|DDX49|CSNK1E|RPS16|RPL14|RPS15|RPL18|RPL36|FAU|BOP1|EXOSC4|RPS19|RPS2|WDR18|RPL24|RPS28|EXOSC5|RPS9|RPL28|RPL29|RPS8|RPS3|RPL18A|TBL3|RPL12|RPL8|RPL37|RPLP2|IMP4|FBL|WDR46|RPL11|RPP25|RPL32|RPS25|PELP1|NOC4L|RPL27A|RPS24|UBA52|RPL37A|RPL5|RPL35A|RPS6|RPS20|RPS11|RPL13A|RPS7|PES1|NOB1|RPSA|RPL30|RPS21|RPL38|RPLP1|RPL3|RPL31|RPL4|RPS18|RPL27|RPS5|RPL10
REAC:R-HSA-8868773	rRNA processing in the nucleus and cytosol	8.00306e-09	186	BUD23|UTP20|EXOSC7|RPL13|RRP1|RRP9|RPL35|DDX49|CSNK1E|RPS16|RPL14|RPS15|RPL18|RPL36|FAU|BOP1|EXOSC4|RPS19|RPS2|WDR18|TSR3|RPL24|RPS28|EXOSC5|RPS9|RPL28|RPL29|RPS8|RPS3|RPL18A|TBL3|RPL12|RPL8|RPL37|RPLP2|IMP4|FBL|WDR46|RPL11|RPP25|RPL32|RPS25|PELP1|NOC4L|RPL27A|RPS24|UBA52|RPL37A|RPL5|RPL35A|RPS6|RPS20|RPS11|RPL13A|RPS7|PES1|NOB1|RPSA|RPL30|RPS21|RPL38|RPLP1|RPL3|RPL31|RPL4|RPS18|RPL27|RPS5|RPL10
REAC:R-HSA-72312	rRNA processing	2.43203e-08	195	BUD23|UTP20|EXOSC7|RPL13|RRP1|RRP9|RPL35|DDX49|CSNK1E|RPS16|RPL14|RPS15|RPL18|RPL36|FAU|BOP1|EXOSC4|RPS19|RPS2|WDR18|TSR3|RPL24|RPS28|EXOSC5|RPS9|RPL28|RPL29|RPS8|RPS3|RPL18A|TBL3|RPL12|HSD17B10|RPL8|RPL37|RPLP2|IMP4|FBL|WDR46|RPL11|RPP25|RPL32|RPS25|PELP1|NOC4L|RPL27A|RPS24|UBA52|RPL37A|RPL5|RPL35A|RPS6|RPS20|RPS11|RPL13A|RPS7|PES1|NOB1|RPSA|RPL30|RPS21|RPL38
GO:0002181	cytoplasmic translation	7.26268e-08	152	RPL13|RPL35|CPEB4|RPS16|DHX29|EIF3G|RPL14|RPS15|RPL18|RPL36|EIF3K|FAU|RPS19|RPS2|RPL24|RPS28|RPS9|RPL28|RPL29|RPS8|RPS3|RPL18A|RPL12|RPL8|RPL37|RPLP2|RPL11|EEF1D|RPL32|RPS25|YBX1|YBX3|RPL27A|RPS24|UBA52|RPL37A|RPL5|RPL35A|RPS6|RPS20|RPS11|RPL13A|IMPACT|RPS7|CPEB2|RPSA|RPL30|RPS21|RPL38|CPEB3|RPLP1|RPL3|RPL31|RPL4|RPS18|RPL27|RPS5|RPL10|SH3BGRL
REAC:R-HSA-9010553	Regulation of expression of SLITs and ROBOs	0.000103209	161	RPL13|RPL35|RPS16|RPL14|RPS15|RPL18|RPL36|FAU|RPS19|RPS2|SEM1|RPL24|RPS28|RPS9|RPL28|RPL29|RPS8|RPS3|RPL18A|RPL12|RPL8|RPL37|RPLP2|PSMB6|RPL11|RPL32|ELOB|RPS25|PSMC3|RPL27A|RPS24|UBA52|RPL37A|RPL5|RPL35A|RPS6|RPS20|RPS11|RPL13A|RPS7|MAGOH|RPSA|RPL30|RPS21|RPL38|RPLP1|RPL3|RPL31|RPL4|RPS18|RPL27|RPS5|RPL10|PSMD4|RPS14|RPL7A|PSMB4
REAC:R-HSA-72766	Translation	0.00023777	284	GADD45GIP1|MRPL4|AURKAIP1|RPL13|MRPS26|MRPL34|RPL35|RPS16|EIF3G|RPL14|RPS15|RPL18|MRPS12|RPL36|EIF3K|MRPL2|FAU|RPS19|MRPL28|RPS2|MRPL12|MRPL52|MRPL55|MRPS25|CARS2|MRPL41|RPL24|RPS28|RPS9|EIF4E|MRPS2|RPL28|RPL29|RPS8|RPS3|RPL18A|RPL12|FARSA|RPL8|MRPL16|RPL37|RPLP2|SSR4|RPL11|EEF1D|RPL32|TUFM|RPS25|MRPS34|MRPS15|RPL27A|MRPL14|SEC61B|RPS24|UBA52|RPL37A|EIF4EBP1|RPL5|RPL35A|RPS6|RPS20|RPS11|MRPS18A|R…
GO:0003018	vascular process in circulatory system	0.000381722	230	PIK3C2A|SLC19A1|ROCK1|PTP4A3|PTPRJ|SLC8A1|ARHGAP35|BMPR2|LRP3|GPX1|MANF|SLC12A2|CTNNBIP1|HTR2B|PLOD3|LEPR|TBXA2R|ZEB2|CYSLTR1|SLC6A9|SLC29A4|ITGA4|ITGB1|SLCO2B1|ADM|ATP2B1|SLC4A3|F2R|AGER|SLC2A10|ABCC9|DOCK4|BMP6|NOS3|KAT2B|SLC1A2|KCNMB1|VEGFA|TEK|SLC2A13|SLC5A3|SLC4A8|SVEP1|SNTA1|ABCC5|FGFBP3|SERPINF2|CXCR2|SLC29A2|OCLN|SLC6A4|ABCB1|AKAP12|SLC7A5|SCNN1B|SLC5A1|ADRA2A|TFRC|KCNMA1|SOD3|ATP8A1|SLIT…
REAC:R-HSA-376176	Signaling by ROBO receptors	0.000723307	204	RPL13|RPL35|RPS16|RPL14|RPS15|RPL18|SOS2|RPL36|FAU|RPS19|RPS2|SEM1|RPL24|RPS28|RPS9|PFN1|RPL28|RPL29|RPS8|RPS3|RPL18A|RPL12|RPL8|RPL37|RPLP2|PSMB6|RPL11|RPL32|GPC1|ELOB|RPS25|PSMC3|RPL27A|PAK4|RPS24|UBA52|RPL37A|RPL5|RPL35A|RPS6|RPS20|RPS11|RPL13A|RPS7|SOS1|MAGOH|RPSA|RPL30|RPS21|RPL38|RPLP1|RPL3|AKAP5|RPL31|RPL4|RPS18|CAP2|RPL27|RPS5|RPL10|NCK2|PSMD4|RPS14|RPL7A|PSMB4|RPL39|SRGAP1|CXCL12
GO:0016197	endosomal transport	0.00115458	277	STX10|RNF126|DNAJC13|ACAP2|HEATR5B|RAB11B|GCC2|PREPL|ITSN2|EPG5|WASHC4|MVB12A|ANKRD50|CERT1|PIK3R4|SNX2|EEA1|PIKFYVE|PLEKHJ1|SLC66A2|CLTC|ALS2|AP5Z1|SCARB2|ARFIP1|SNX6|ATP9A|VPS13B|SPAG9|ARFRP1|HEATR5A|RAB8B|MAP2K2|RILP|STAM2|ABCA1|EVI5|SNX18|WASHC1|HOOK2|TOM1|HOOK1|UBXN6|TINAGL1|TRAPPC10|SORL1|KIF16B|WASHC5|ZFYVE16|ALS2CL|ERC1|AGAP2|ALMS1|LRRK2|HGS|RIC1
GO:0003013	circulatory system process	0.00120206	488	PIK3C2A|ZNHIT1|SLC19A1|GNA13|PIK3CA|LNPEP|PPP1R13L|ROCK1|ATP2A1|PTP4A3|SMAD5|PTPRJ|AKAP9|PLCB3|SLC8A1|ARHGAP35|BMPR2|AGTRAP|LRP3|GPX1|MANF|SLC12A2|CTNNBIP1|SUCNR1|WNK1|HSD11B2|HTR2B|MAP2K3|MYOF|C3AR1|PLOD3|ANK2|TNNI2|TBX2|LEPR|TBXA2R|DMPK|ZEB2|MDM2|BBS4|CYSLTR1|TMEM161B|POMC|SLC6A9|PIK3CG|SLC29A4|ITGA4|ITGB1|APLN|HEG1|ADM5|PTPRO|SLCO2B1|GAA|MYLK2|ADM|CPA3|ATP2B1|SLC4A3|F2R|AGER|SLC2A10|ABCC9|DOCK…
GO:0016072	rRNA metabolic process	0.00158151	252	TRIR|WDR74|BUD23|RNASEL|UTP20|EXOSC7|RRP1|NSUN5|RRP9|SART1|KRI1|RPL35|DDX49|POP7|RPS16|RPL14|RPS15|RPUSD1|BOP1|EXOSC4|RPS19|SMARCB1|ZCCHC4|WDR18|TSR3|RPS28|EXOSC5|RPS8|METTL15|BRF1|TBL3|NOP53|PPAN|SIRT7|IMP4|FBL|WDR46|DIS3L|RPL11|GTF3C4|RPP25|GTF3C5|RPS25|PELP1|XRN1|NOC4L|TCOF1|PIH1D1|RPS24|RPL5|RPL35A|DDX54|RPS6|RPS7|PES1|NPM3|NOB1|TENT4B|RPS21|RRS1|NAF1|PA2G4|SRFBP1|CDKN2A|YBEY|ISG20
GO:0006886	intracellular protein transport	0.00202674	654	SEC24B|STX10|CHM|TIMM44|VPS13C|TNPO1|UHMK1|LMNA|SPG11|IPO7|SYNRG|CLTB|TRIM23|TOMM40|VPS41|SEC24D|SIRT6|APPBP2|PTPN11|GCC2|RAB3GAP2|SEC24A|COPB1|TMED1|B3GAT3|MVB12A|STXBP2|PIK3R4|IPO8|SNX2|ADAR|HYAL2|USP9X|KIF3A|SEC13|PEX14|WDR11|CEP290|CLTC|EMD|SEL1L|IPO11|USO1|SCARB2|ARFIP1|SNX6|AP4M1|PEX1|PDCD5|ZFAND2B|CEP131|ARFRP1|NF1|RAB8B|ARF5|SFN|EP300|RANBP2|TIMM50|STAM2|M6PR|STK4|CCHCR1|ICE1|KIF5B|APPL2|…
GO:0006364	rRNA processing	0.00226752	214	WDR74|BUD23|RNASEL|UTP20|EXOSC7|RRP1|NSUN5|RRP9|SART1|KRI1|RPL35|DDX49|POP7|RPS16|RPL14|RPS15|RPUSD1|BOP1|EXOSC4|RPS19|ZCCHC4|WDR18|TSR3|RPS28|EXOSC5|RPS8|METTL15|TBL3|NOP53|PPAN|SIRT7|IMP4|FBL|WDR46|RPL11|RPP25|RPS25|PELP1|NOC4L|PIH1D1|RPS24|RPL5|RPL35A|DDX54|RPS6|RPS7|PES1|NPM3|NOB1|TENT4B|RPS21|RRS1|NAF1|PA2G4|SRFBP1|CDKN2A|YBEY|ISG20
GO:0006338	chromatin remodeling	0.00462331	541	SPTY2D1|ATRX|ZNHIT1|MBD3|CARM1|BPTF|SMARCAD1|BCL7C|SMARCA5|LMNA|TRIP12|SETD7|KDM3B|PIK3CA|ZNF827|CTR9|ARID4B|SIRT6|CLOCK|REST|BRPF3|NSD1|ASH1L|HCFC2|NIPBL|ZNF304|CHD6|ARID4A|MTA1|KDM6A|RESF1|CHD9|SUZ12|ERCC6L2|ZBTB1|HDGFL2|NCOA1|NCOA3|TAF1|H2AX|KAT6B|PRDM2|RUVBL2|SMARCB1|RIF1|PRMT1|MIER2|TASOR|NTMT1|INO80E|LIN54|ARID2|EP300|BABAM1|CHD1|SRPK2|KMT2C|SMARCD3|ATF7IP|CHD4|RSBN1|HR|SIRT1|DTX3L|ATM|NOC2…
GO:0016482	cytosolic transport	0.0053699	134	STX10|VPS13C|RNF126|HEATR5B|GCC2|PREPL|AP1AR|CERT1|SNX2|PIKFYVE|PLEKHJ1|SLC66A2|CLTC|ARFIP1|SNX6|ATP9A|AP4M1|MON2|SPAG9|ARFRP1|HEATR5A
GO:0006325	chromatin organization	0.00548985	679	SPTY2D1|ATRX|ZNHIT1|MBD3|CARM1|BPTF|SMARCAD1|BCL7C|SMARCA5|LMNA|SLF2|TRIP12|SETD7|KDM3B|PIK3CA|ZNF827|CTR9|ARID4B|SIRT6|CLOCK|LRWD1|BUD23|REST|TET2|RBL2|BRPF3|PHF20|NSD1|ASH1L|HCFC2|NIPBL|ZNF304|CHD6
GO:0006412	translation	0.00712673	629	METTL14|CNOT6L|UHMK1|GADD45GIP1|MRPL4|SEPSECS|IREB2|PTCD1|ELOF1|GIGYF2|DDX3X|AURKAIP1|RPL13|NSUN5|ZNF598|LARP4|MRPS26|MRPL34|PURA|RPL35|CPEB4|RPS16|DHX29|EIF3G|EEFSEC|RPL14|RCHY1|RPS15|RPL18|MRPS12|EIF2AK3|RPL36|DAPK3|EIF3K|SECISBP2L|CNOT6|MRPL2|FAU|RPS19|MRPL28|EIF5A|PRMT1|RPS2|ZCCHC4|MRPL12|MRPL52|MRPL55|MRPS25|CARS2|MRPL41|MPV17L2|RPL24|DHPS|RPS28|RPS9|EIF4E|MRPS2|RPL28|RPUSD3|RRBP1|RPL29|RPS8…
GO:0042147	retrograde transport, endosome to Golgi	0.00794228	95	STX10|RNF126|HEATR5B|GCC2|PREPL|CERT1|SNX2|PIKFYVE|PLEKHJ1|SLC66A2|CLTC|ARFIP1|SNX6|ATP9A|SPAG9|ARFRP1|HEATR5A
REAC:R-HSA-8953854	Metabolism of RNA	0.00811795	678	METTL14|CNOT6L|SF3A2|TNPO1|CCDC12|SNRPA|LSM7|RBM42|SMG1|TRMT1|QTRT1|CTU2|DDX46|BUD23|ISY1|PRKRIP1|TRMT61A|UTP20|EXOSC7|RPL13|RRP1|RRP9|SART1|PQBP1|RPL35|SRRT|ADAR|THOC6|DDX49|CSNK1E|POP7|RPS16|SNRPB|SEC13|RPL14|DHX15|RPS15|RPL18|SNRNP70|DDX39A|POLR2F|POLR2I|FAM50A|RPL36|SMG8|BUD31|XAB2|CNOT6|FAU|BOP1|EXOSC4|RPS19|SUGP1|RPS2|POLR2J|SEM1|WDR18|TSR3|RPL24|RPS28|CPSF4|RANBP2|EXOSC5|RPS9|EIF4E|RPL28|R…
GO:0006936	muscle contraction	0.00983974	276	PIK3C2A|CHUK|PIK3CA|PPP1R13L|TPM2|CERT1|SMTN|ROCK1|MYL6B|ATP2A1|EMD|DAPK3|SMAD5|AKAP9|CHRNE|SCN11A|SLC8A1|MYL6|HTR2B|MAP2K3|MYOF|ANK2|TNNI2|SRF|TBX2|TBXA2R|DMPK|UTRN|SPHK1|APBB2|PIK3CG|JSRP1|STAC2|GAA|MYLK2|ENO1|ATP2B1|F2R|ABCC9|DOCK4|BIN1|SLC6A8|P2RX6|CNN1|MYL5|C12orf57|GHRL|CLIC2|TMEM38A|SNTA1|PDE5A|MYH7B|MYL9|TCAP|LARGE1|ABAT|CCDC78|NPNT|NOS1AP|KCNJ5|CACNA2D1|SCN7A|TNNC2|ACTA1|CRYAB|CAMK2D|SCN…
GO:0042254	ribosome biogenesis	0.0119609	303	ZNF593|WDR74|DDX3X|BUD23|RNASEL|UTP20|EXOSC7|RRP1|NSUN5|RRP9|SART1|KRI1|RPL35|DDX49|POP7|RPS16|DHX29|RPS19BP1|RPL14|RPS15|NOP16|RPUSD1|BOP1|EXOSC4|RPS19|ZCCHC4|WDR18|TSR3|MPV17L2|RPL24|RPS28|EXOSC5|RPS9|MRPS2|RPS8|METTL15|TBL3|NOP53|PPAN|NOC2L|SIRT7|IMP4|FBL|WDR46|RPL11|RPP25|RPS25|PELP1|NOC4L|PIH1D1|MYBBP1A|RPS24|RPL5|RPL35A|DDX54|RPS6|SURF6|RPS11|RPS7|PES1|NPM3|NOB1|RPSA|TENT4B|RPS21|RRS1|RPL38…
REAC:R-HSA-72662	Activation of the mRNA upon binding of the cap-binding complex and eIFs, and subsequent binding to 43S	0.0172275	58	RPS16|EIF3G|RPS15|EIF3K|FAU|RPS19|RPS2|RPS28|RPS9|EIF4E|RPS8|RPS3|RPS25|RPS24|EIF4EBP1|RPS6|RPS20|RPS11|RPS7|RPSA|RPS21
REAC:R-HSA-72695	Formation of the ternary complex, and subsequently, the 43S complex	0.0209179	50	RPS16|EIF3G|RPS15|EIF3K|FAU|RPS19|RPS2|RPS28|RPS9|RPS8|RPS3|RPS25|RPS24|RPS6|RPS20|RPS11|RPS7|RPSA|RPS21
REAC:R-HSA-8953897	Cellular responses to stimuli	0.0272231	710	CARM1|LMNA|MAFK|CREB1|CLOCK|CUL3|COX4I1|EXOSC7|RPL13|FNIP1|MBTPS2|RPL35|CREBRF|NCOA2|RPS16|SEC13|PHC3|LAMTOR4|RPS19BP1|RPL14|CHD9|NPRL3|RPS15|RPL18|SUZ12|TLR4|NBN|EIF2AK3|ATF6|RPL36|ERF|NCOA1|SCO2|FAU|H2AX|EXOSC4|RPS19|CDKN2D|FZR1|RPS2|KPTN|CXXC1|CYBA|SEM1|KLHDC3|RPL24|ATP7A|GSTP1|TUBB4B|RPS28|EP300|RANBP2|EXOSC5|RPS9|RPL28|NR3C1|SMARCD3|RPL29|RPS8|RPS3|TUBB6|RPL18A|ZBTB17|RPL12|PPP1R15A|ACD|RPL8…
REAC:R-HSA-199991	Membrane Trafficking	0.0273424	592	PIK3C2A|SEC24B|RAB33B|STX10|CHM|TRAPPC11|TRIP10|RALGAPB|KIF3B|DENND4A|DENND4C|CLTB|MAN1A2|SEC24D|SH3GL1|LNPEP|RAB11B|PACSIN3|GCC2|ARPC4|ITSN2|TBC1D15|CPD|RAB3GAP2|SEC24A|COPB1|MVB12A|FCHO2|COPE|SNX2|USE1|KIF3A|SEC13|GRK3|CLTC|ALS2|GAPVD1|EPN1|TRAPPC8|SBF2|GOLGB1|USO1|SCARB2|AP4M1|GALNT1|KIF21A|RABGEF1|NAA30|NAA38|ARFRP1|RAB8B|TRIP11|ARF5|SFN|TUBB4B|KLC3|STAM2|M6PR|KIF5B|SNX18|AP4E1|EXOC5|EXOC8|RI…
GO:0043043	peptide biosynthetic process	0.0274329	653	METTL14|CNOT6L|AASDH|UHMK1|GADD45GIP1|MRPL4|SEPSECS|IREB2|PTCD1|ELOF1|GIGYF2|DDX3X|AURKAIP1|RPL13|NSUN5|ZNF598|LARP4|MRPS26|MRPL34|PURA|RPL35|CPEB4|RPS16|DHX29|EIF3G|EEFSEC|RPL14|RCHY1|RPS15|RPL18|MRPS12|EIF2AK3|RPL36|DAPK3|EIF3K|SECISBP2L|CNOT6|MRPL2|FAU|RPS19|MRPL28|EIF5A|PRMT1|RPS2|ZCCHC4|MRPL12|MRPL52|MRPL55|MRPS25|CARS2|MRPL41|MPV17L2|RPL24|DHPS|RPS28|RPS9|EIF4E|MRPS2|RPL28|RPUSD3|RRBP1|RPL2…
GO:0007204	positive regulation of cytosolic calcium ion concentration	0.0285855	125	GNA13|NMB|BAX|LPAR2|SLC8A1|CCR8|FPR3|C3AR1|TBXA2R|ITGAV|BCL2|ESR1|CMKLR1|JPH2|CYSLTR1|PIK3CG|CCR4|FIS1|ADM|LRP6|P2RX7|PKD2|F2R|JAK2|BCAP31|GHRL|C5AR2|CACNA1A|LPAR1|SAA1|PTGER2|CXCR2|GPR35|CCR1|CACNA2D1|CCR2|CIB2|GPER1|CCR5|S1PR3|EDNRB|XCR1|RYR2|FPR1|EDNRA|TRPV4|ADCY5|PTGER4|CX3CR1|GNAT2|CXCR6|PRKG1|CD38|LPAR3|P2RX5|JPH3|CD36|PTGER3|AGTR1|GLP1R
GO:0070828	heterochromatin organization	0.029349	94	SPTY2D1|ATRX|MBD3|SMARCA5|LMNA|TRIP12|SETD7
GO:0019730	antimicrobial humoral response	0.0347165	58	FAM3A|FAU|RPS19|NCR3LG1|ROMO1|GAPDH|DEFB1|PI3|SLPI|RPL30|KLK7|KLK5|PLA2G6|SPON2|KRT6A|RPL39|RARRES2|CXCL1|CTSG|SLC11A1|S100A9|LYZ|S100A7|NOD2|H2BC11|CXCL2|CST9|WFDC2|COLEC11|CXCL9|JCHAIN|TF|SPINK5
REAC:R-HSA-2262752	Cellular responses to stress	0.0357729	701	CARM1|LMNA|MAFK|CREB1|CLOCK|CUL3|COX4I1|EXOSC7|RPL13|FNIP1|MBTPS2|RPL35|CREBRF|NCOA2|RPS16|SEC13|PHC3|LAMTOR4|RPS19BP1|RPL14|CHD9|NPRL3|RPS15|RPL18|SUZ12|TLR4|NBN|EIF2AK3|ATF6|RPL36|ERF|NCOA1|SCO2|FAU|H2AX|EXOSC4|RPS19|CDKN2D|FZR1|RPS2|KPTN|CXXC1|CYBA|SEM1|KLHDC3|RPL24|ATP7A|GSTP1|TUBB4B|RPS28|EP300|RANBP2|EXOSC5|RPS9|RPL28|NR3C1|SMARCD3|RPL29|RPS8|RPS3|TUBB6|RPL18A|ZBTB17|RPL12|PPP1R15A|ACD|RPL8…
GO:0022613	ribonucleoprotein complex biogenesis	0.0436158	448	SETX|SF3A2|ZNF593|SCAF11|WDR74|DDX3X|DDX46|BUD23|ISY1|RNASEL|UTP20|EXOSC7|RRP1|NSUN5|RRP9|SART1|KRI1|RPL35|ADAR|DDX49|POP7|RPS16|DHX29|EIF3G|SNRPB|RPS19BP1|RPL14|RPS15|NOP16|RPUSD1|EIF3K|XAB2|BOP1|EXOSC4|RPS19|RUVBL2|ZCCHC4|WDR18|TSR3|MPV17L2|RPL24|RPS28|EXOSC5|RPS9|MRPS2|SRPK2|RPS8|LSM4|SF3B5|METTL15|TBL3|NOP53|PPAN|ATM|NOC2L|SIRT7|IMP4|FBL|SNRPD2|WDR46|SRPK3|RPL11|RPP25|TSSC4|DICER1
GO:0006959	humoral immune response	0.0444958	142	FAM3A|FAU|RPS19|NCR3LG1|ROMO1|C8G|GAPDH|NOTCH2|DEFB1|FCN3|CD46|GPI|BCL2|PI3|SLPI|PTPRC|CFH|RPL30|KLK7|KLK5|C5|PLA2G6|SPON2|NOTCH1|TFEB|SVEP1|KRT6A|RPL39|IL7|CD28|RARRES2|BLNK|FCGR2B|VSIG4|GATA3|SPNS2|CCR2|CFB|CXCL1|FCMR|CTSG|SLC11A1|S100A9|LYZ|COLEC10|S100A7|CR1|SH2D1A|NOD2|H2BC11|CXCL2|CST9|WFDC2|COLEC11|CXCL9|C7|C4B|FCN2|C4A|MS4A1|JCHAIN|LTA|TF|SPINK5|FCN1|C6
REAC:R-HSA-72649	Translation initiation complex formation	0.0486725	57	RPS16|EIF3G|RPS15|EIF3K|FAU|RPS19|RPS2|RPS28|RPS9|EIF4E|RPS8|RPS3|RPS25|RPS24|RPS6|RPS20|RPS11|RPS7|RPSA|RPS21
REAC:R-HSA-72702	Ribosomal scanning and start codon recognition	0.0486725	57	RPS16|EIF3G|RPS15|EIF3K|FAU|RPS19|RPS2|RPS28|RPS9|EIF4E|RPS8|RPS3|RPS25|RPS24|RPS6|RPS20|RPS11|RPS7|RPSA|RPS21

## Sheet: PLGRKT_Basal_q25vs25
term_id	term_name	adjusted_p_val	term_size	overlap
GO:0035082	axoneme assembly	6.53712e-07	68	DNAH5|CEP131|DNAH17|DNAH7|RSPH1|CFAP43|DNAAF4|LRGUK|CFAP69|FOXJ1|ZMYND10|CFAP58|DNAI3|CFAP91|SPEF1|CFAP46|TEKT2|SPEF2|DCLK1|RP1|TPGS1|HYDIN|DNAAF3
GO:0003341	cilium movement	1.44577e-05	139	NME5|CFAP61|DNAH5|CEP131|DNAH17|DNAH7|CFAP43|DNAAF4|RFX3|CFAP69|SPA17|NEK10|ZMYND10|CFAP58|DNAI3|IQUB|CFAP91|TTLL9|SPEF1|DEFB1|CFAP46|DYNC2H1|TEKT2|DNALI1|SPEF2|ROPN1L
GO:0008544	epidermis development	1.48809e-05	280	IFT74|ZDHHC21|SLC39A2|NOTCH1|BCL2|IL20|ASAH1|SFN|ELAPOR2|EVPL|GJB5|TCHH|JAG2|PLAAT4|SCRIB|KLK7|TMEM132E|EDA|CALML5|EPHA2|SFRP4|SLC44A4|GATA6|UGCG|LHX2|TGM1|CELSR1|KLK5|KRT6A|TGFB2|KRT16|COL7A1|KRT86|CNFN|TNFRSF19|SOSTDC1|FLG|TGM5|FGF10|SPINK5|KRT80|PLA2G10|GAL|SULT2B1|FST|CDH3|MSX2|FGFR2|S100A7|KRT17
REAC:R-HSA-373076	Class A/1 (Rhodopsin-like receptors)	2.55547e-05	187	RLN2|CX3CR1|P2RY12|GPR65|P2RY13|C5AR2|CYSLTR1|GPR68|PTGER3|S1PR5|ADORA3|C5|SUCNR1|NPW|C3AR1|GRPR|CXCL12|CCL2|AGTR1|HCAR1|FPR1|OXGR1|CCR5|CCL4|ADRA2A|P2RY10|FFAR2|CYSLTR2|HTR2B|HTR7|CHRM1|GPR143|GAL|NMU|CXCL1|CCL5|CHRM3|GPR37
REAC:R-HSA-112316	Neuronal System	4.44142e-05	300	PPFIA3|KCNJ11|SLITRK5|TUBA4A|CACNB1|KCNG1|PRKAA2|KCNQ4|SLC1A1|GLUL|GABRR2|APBA1|TUBB4A|KCNH2|TUBA3D|GRIN3B|LIN7B|AKAP5|KCNH1|LIN7A|KCND3|CHRNA6|NCALD|ABCC8|GRIA4|SYT1|CHRNA5|ABAT|SLC6A11|KCNK13|NBEA|CHRNA3|GRIK4|PTPRD|SLC6A4|TUBB8B|TUBA3E|APBA2|GRIN2C|CACNA1B|ACHE|KCND2|KCNB1|LRRC4B|KCNK3|HCN2|KCNQ5|NTRK3|GABRB2|PANX2
GO:0001578	microtubule bundle formation	0.000138914	95	DNAH5|CEP131|DNAH17|DNAH7|RSPH1|CFAP43|DNAAF4|LRGUK|CFAP69|FOXJ1|ZMYND10|CFAP58|DNAI3
GO:0098659	inorganic cation import across plasma membrane	0.00023392	95	KCNJ11|TRPV6|CACNA1D|KCNH2|SLC39A4|AKAP5|ABCC8|CACNA1I|ATP1B1|STEAP2|CACNA2D1|SLC9A2|KCNK5|SLC12A1|SLC39A6|CACNA1B|SLC24A2|SCNN1A|SLC30A8|SLC9A3|SLC12A2|HCN2|SCNN1G|SCN7A
GO:0099587	inorganic ion import across plasma membrane	0.00023392	95	KCNJ11|TRPV6|CACNA1D|KCNH2|SLC39A4|AKAP5|ABCC8|CACNA1I|ATP1B1|STEAP2|CACNA2D1|SLC9A2|KCNK5|SLC12A1|SLC39A6|CACNA1B|SLC24A2|SCNN1A|SLC30A8|SLC9A3|SLC12A2|HCN2|SCNN1G|SCN7A
GO:0043588	skin development	0.00027333	236	IFT74|ZDHHC21|SLC39A2|SLITRK5|NOTCH1|BCL2|IL20|ASAH1|SFN|EVPL|TCHH|GJB3|PLAAT4|ATP8A2|EDA|EPHA2|GATA6|UGCG|LHX2|CDSN|TGM1|CELSR1|KLK5|KRT6A|TGFB2|KRT16|KRT86|CNFN|TNFRSF19|SOSTDC1|FLG|FGF10|SPINK5|KRT80|PLA2G10|GAL|FST|CDH3|MSX2|FGFR2|S100A7|KRT17
REAC:R-HSA-500792	GPCR ligand binding	0.00053544	260	RLN2|CX3CR1|P2RY12|GPR65|P2RY13|C5AR2|CYSLTR1|GPR68|PTGER3|FZD9|S1PR5|WNT6|ADORA3|C5|SUCNR1|NPW|C3AR1|GRPR|CXCL12|CCL2|AGTR1|HCAR1|FPR1|OXGR1|CCR5|CCL4|ADRA2A|P2RY10|ADM|GRM4|FFAR2|CYSLTR2|HTR2B|HTR7|CHRM1|GPR143|WNT2|GAL|GLP1R|NMU|CXCL1|CCL5|CHRM3|GPR37
GO:0098739	import across plasma membrane	0.00077968	158	KCNJ11|TRPV6|CACNA1D|SLC1A1|KCNH2|SLC7A5|SLC39A4|SLC6A9|SLC15A2|LRP2|AKAP5|ABCC8|CACNA1I|ATP1B1|STEAP2|SLC15A1|CACNA2D1|SLC9A2|KCNK5|SLC7A8|SLC12A1|SLC39A6|CACNA1B|SLC24A2|SCNN1A|SLC30A8|SLC9A3|SLC12A2|HCN2
REAC:R-HSA-1442490	Collagen degradation	0.00107588	57	FURIN|COL23A1|COL26A1|CTSK|COL11A2|COL9A3|COL8A2|MMP2|MMP15|COL12A1|COL7A1|COL11A1|COL10A1|COL8A1|MMP3|COL2A1|MMP13
GO:0007018	microtubule-based movement	0.00122173	344	IFT74|WDR19|NME5|SUN2|DYNLRB2|CFAP61|DNAH5|KIF5C|CEP131|DNAH17|RAB27B|DNAH7|KIF16B|CFAP43|DNAAF4|RFX3|CFAP69|SPA17|NEK10|ZMYND10|APBA1|CFAP58|DNAI3
GO:0006959	humoral immune response	0.00142999	142	NOTCH1|BCL2|COLEC11|TNFRSF21|BMI1|CFB|FOXJ1|IL1B|KLK7|NCR3LG1|C5|CCL2|GATA6|GATA3|DEFB1|C4B|KLK5|KRT6A|C4A|S100A9|VSIG4|PI3|SLPI|MASP1|CST9|SPINK5|S100A7|CXCL1|FCN1
GO:0007268	chemical synaptic transmission	0.00158272	569	JAK2|PPFIA3|CX3CR1|AMPH|SLITRK5|CACNB1|SLC1A1|GABRR2|APBA1|AKAP9|SCRIB|CADPS2|IL1B|SLC4A8|ADORA3|SLC6A9|DVL1|GRIN3B|LRP8|PPP1R9A|ADGRB1|LIN7B|AKAP5|SYNGR1|HAP1|LIN7A|CHRNA6|ABCC8|CCL2|GRIA4|SYT1|CHRNA5|ABAT|PDE9A|CHRNA3|GRIK4|LYNX1|P2RX5|PVALB|PTPRD|CDC20|ADRA2A|CLSTN2|SCN2B|GABRE|SLC6A4|SNCG|RASD2|MAPT|RIMS3|APBA2|GRM4|GRIN2C|CACNA1B|PLAT|SLC24A2|ACHE|EGR3|HTR2B|KCND2|HTR7|KCNB1|KCNK3|TPGS1|SLC1…
GO:0098916	anterograde trans-synaptic signaling	0.00158272	569	JAK2|PPFIA3|CX3CR1|AMPH|SLITRK5|CACNB1|SLC1A1|GABRR2|APBA1|AKAP9|SCRIB|CADPS2|IL1B|SLC4A8|ADORA3|SLC6A9|DVL1|GRIN3B|LRP8|PPP1R9A|ADGRB1|LIN7B|AKAP5|SYNGR1|HAP1|LIN7A|CHRNA6|ABCC8|CCL2|GRIA4|SYT1|CHRNA5|ABAT|PDE9A|CHRNA3|GRIK4|LYNX1|P2RX5|PVALB|PTPRD|CDC20|ADRA2A|CLSTN2|SCN2B|GABRE|SLC6A4|SNCG|RASD2|MAPT|RIMS3|APBA2|GRM4|GRIN2C|CACNA1B|PLAT|SLC24A2|ACHE|EGR3|HTR2B|KCND2|HTR7|KCNB1|KCNK3|TPGS1|SLC1…
GO:0010817	regulation of hormone levels	0.0016646	421	JAK2|FAM3D|FURIN|KCNJ11|SLC26A7|HSD17B2|MYRIP|BRSK2|DHCR7|SOX8|TRPV6|CTSK|RFX3|DDO|GPR68|MYB|IL1B|SLC7A5|UGT2B15|BIRC5|ESR1|ABCC8|STC2|TSPO|ABAT|AGTR1|TBX3|GATA3|CEL|DUOX1|KLK6|C1QTNF3|PCSK1N|SLC7A8|CPA3|PCSK6|FOXA1|ADRA2A|AKR1C1|RDH16|RDH10|CFTR|FAM3B|ADM|C1QTNF12|FFAR2|CORIN|AKR1C2|CYP11A1|SLC30A8|KCNB1|IGF1R|GAL|GLP1R|VGF|LRAT|DUOXA2|CCL5|PTPRN2|CHRM3
GO:0099537	trans-synaptic signaling	0.00207857	573	JAK2|PPFIA3|CX3CR1|AMPH|SLITRK5|CACNB1|SLC1A1|GABRR2|APBA1|AKAP9|SCRIB|CADPS2|IL1B|SLC4A8|ADORA3|SLC6A9|DVL1|GRIN3B|LRP8|PPP1R9A|ADGRB1|LIN7B|AKAP5|SYNGR1|HAP1|LIN7A|CHRNA6|ABCC8|CCL2|GRIA4|SYT1|CHRNA5|ABAT|PDE9A|CHRNA3|GRIK4|LYNX1|P2RX5|PVALB|PTPRD|CDC20|ADRA2A|CLSTN2|SCN2B|GABRE|SLC6A4|SNCG|RASD2|MAPT|RIMS3|APBA2|GRM4|GRIN2C|CACNA1B|PLAT|SLC24A2|ACHE|EGR3|HTR2B|KCND2|HTR7|KCNB1|KCNK3|TPGS1|SLC1…
GO:0051962	positive regulation of nervous system development	0.00319384	255	CDON|CX3CR1|PLXNB3|SLITRK5|SOX8|NOTCH1|CYSLTR1|ZNF488|MYB|OBSL1|IL1B|CHODL|SLC7A5|IL6ST|LRP8|LRP2|ADGRB1|VSTM5|MYRF|HAP1|CXCL12|TSPO|LRRN1|PTPRD|CLSTN2|MAG|SYNDIG1|MAPT|PTPRZ1|GLI3|ROBO2|LRRC4B|CDH4|L1CAM|SOX10|ACAN|BCL11A|FLRT3|WNT2|CBLN2|IL34
GO:0009913	epidermal cell differentiation	0.00337352	164	IFT74|SLC39A2|NOTCH1|IL20|ASAH1|SFN|EVPL|TCHH|JAG2|PLAAT4|SCRIB|TMEM132E|EPHA2|SFRP4|SLC44A4|GATA6|UGCG|TGM1|KLK5|KRT6A|KRT16|KRT86|CNFN|FLG|SPINK5|KRT80|SULT2B1|CDH3|MSX2|S100A7|KRT17
GO:0042391	regulation of membrane potential	0.00353885	340	KCNJ11|BCL2|ABCD1|PMAIP1|FZD9|CACNA1D|GABRR2|AKAP9|SLC4A11|SLC4A8|KCNH2|DVL1|GRIN3B|CXADR|KCNH1|KCND3|CHRNA6|DCN|CACNA1I|GRIA4|CHRNA5|TSPO|PLN|ABAT|ATP1B1|KCNK13|CHRNA3|GRIK4|P2RX5|CACNA2D1|PIEZO2|STOX1|KCNK5|SCN2B|GABRE|SLC6A4|NDP|MAPT|CFTR|RIMS3|GRIN2C|KCND2|KCNB1|KCNK3|HCN2|CHRM1|KCNQ5|GABRB2|SLC25A27
GO:0099536	synaptic signaling	0.00371878	592	JAK2|PPFIA3|CX3CR1|AMPH|SLITRK5|CACNB1|SLC1A1|GABRR2|APBA1|AKAP9|SCRIB|CADPS2|IL1B|SLC4A8|ADORA3|SLC6A9|DVL1|GRIN3B|LRP8|PPP1R9A|ADGRB1|LIN7B|AKAP5|SYNGR1|HAP1|LIN7A|CHRNA6|ABCC8|CCL2|GRIA4|SYT1|CHRNA5|ABAT|PDE9A|CHRNA3|GRIK4|LYNX1|P2RX5|PVALB|PTPRD|CDC20|ADRA2A|CLSTN2|SCN2B|GABRE|SLC6A4|SNCG|RASD2|MAPT|PRR7|RIMS3|APBA2|GRM4|GRIN2C|CACNA1B|PLAT|SLC24A2|ACHE|EGR3|HTR2B|KCND2|HTR7|KCNB1|KCNK3|TPGS1…
REAC:R-HSA-112315	Transmission across Chemical Synapses	0.00420031	203	PPFIA3|TUBA4A|CACNB1|PRKAA2|SLC1A1|GLUL|GABRR2|APBA1|TUBB4A|TUBA3D|GRIN3B|LIN7B|AKAP5|LIN7A|CHRNA6|NCALD|GRIA4|SYT1|CHRNA5|ABAT|SLC6A11|NBEA|CHRNA3|GRIK4
GO:0090596	sensory organ morphogenesis	0.00498814	227	WDR19|CDON|SOX8|NOTCH1|BCL2|DZANK1|TBX2|KCNQ4|SLC1A1|SDK2|MFAP5|SCRIB|ATP8A2|VAX2|DVL1|EPHA2|TSKU|SLC44A4|TBX3|COL8A2|GATA3|CELSR1|STOX1|FASLG|NDP|COL11A1|GLI3|TBX1|FSCN2|TENM3|COL8A1|EFEMP1|RP1|FGF10|WNT2|COL2A1|FGFR2
GO:0030001	metal ion transport	0.00743834	688	SLC40A1|KCNJ11|SLC39A2|BCL2|TRPV6|CYBRD1|CACNB1|KCNG1|G6PD|SLC6A8|CYSLTR1|TTYH1|CD33|KCNQ4|NIPAL1|CACNA1D|SLC1A1|AKAP9|SLC4A11|SLC4A8|KCNH2|SLC39A4|SLC6A9|GRIN3B|LILRA2|LRP2|AKAP5|KCNH1|HAP1|KCND3|CXCL12|MELTF|ABCC8|CCL2|CACNA1I|CBARP|STC2|TSPO|PLN|ATP1B1|SLC6A11|KCNK13|STAC2|STEAP2|PIK3CG|P2RX5|CACNA2D1|CCR5|SLC9A2|KCNK5|CCL4|ADRA2A|SCN2B|FASLG|SLC12A1|SLC6A4|ATP2B2|SLC39A6|LCN2|GSTM2|NKAIN1|PLC…
GO:0098660	inorganic ion transmembrane transport	0.00752041	686	SLC40A1|KCNJ11|SLC26A7|SLC39A2|BCL2|TRPV6|CLIC6|SLC26A6|CACNB1|KCNG1|G6PD|SLC6A8|TTYH1|KCNQ4|NIPAL1|CACNA1D|SLC1A1|GABRR2|AKAP9|SLC4A11|SLC4A8|KCNH2|SLC39A4|SLC25A10|SLC6A9|SLC15A2|GRIN3B|AKAP5|KCNH1|HAP1|SLC26A8|KCND3|ABCC8|CACNA1I|CBARP|PLN|ATP1B1|SLC6A11|KCNK13|STAC2|STEAP2|PIK3CG|SLC15A1|P2RX5|CACNA2D1|CCR5|SLC9A2|KCNK5|ADRA2A|SCN2B|FASLG|GABRE|SLC12A1|SLC6A4|ATP6V0D2|CFTR|ATP2B2|SLC39A6|GSTM…
REAC:R-HSA-1474228	Degradation of the extracellular matrix	0.0097412	124	FURIN|COL23A1|COL26A1|CTSK|CTSV|KLK7|COL11A2|COL9A3|DCN|COL8A2|MMP2|MMP15|COL12A1|COL7A1|COL11A1|TPSAB1|COL10A1|FBN3|COL8A1|CAPN14|ACAN|MMP3|COL2A1|MMP13|CAPN13
GO:0030216	keratinocyte differentiation	0.0115751	109	IFT74|SLC39A2|NOTCH1|IL20|ASAH1|SFN|EVPL|TCHH|PLAAT4|EPHA2|UGCG|TGM1|KLK5|KRT6A|KRT16|KRT86|CNFN|FLG|KRT80|CDH3|MSX2|S100A7|KRT17
GO:0099111	microtubule-based transport	0.0143074	198	IFT74|WDR19|NME5|SUN2|DNAH5|KIF5C|CEP131|RAB27B|CFAP43|DNAAF4|RFX3|SPA17|NEK10
GO:0045229	external encapsulating structure organization	0.0151131	293	FURIN|SCX|COL23A1|NOTCH1|CTSK|HPSE2|CTSV|KLK7|COL11A2|COL9A3|MELTF|LUM|COL8A2|SFRP2|SERPINF2|TGM1|KLK5|MMP2|DPT|TGFB2|TNFRSF11B|MMP15|COL12A1|ECM2|COL7A1|COL11A1|FMOD|TPSAB1|COL10A1|THSD4|NOXO1|GREM1|COL8A1|VTN|SPINK5|ACAN|KLK4|MMP3|ADTRP|COL2A1|SMOC1|POSTN|MMP13|NTN4
GO:0098773	skin epidermis development	0.0159712	111	ZDHHC21|NOTCH1|BCL2|SFN|EDA|GATA6|UGCG|LHX2|CELSR1|TGFB2|KRT16|TNFRSF19|SOSTDC1|FLG|FGF10|SPINK5|PLA2G10|GAL|FST|CDH3|MSX2|FGFR2|KRT17
GO:0042303	molting cycle	0.016493	96	ZDHHC21|NOTCH1|BCL2|EDA|TSKU|LHX2|CELSR1|TGFB2|KRT16|TNFRSF19|SOSTDC1|FGF10|SPINK5|PLA2G10|GAL|TRPV3|FST|CDH3|MSX2|FGFR2|KRT17
GO:0042633	hair cycle	0.016493	96	ZDHHC21|NOTCH1|BCL2|EDA|TSKU|LHX2|CELSR1|TGFB2|KRT16|TNFRSF19|SOSTDC1|FGF10|SPINK5|PLA2G10|GAL|TRPV3|FST|CDH3|MSX2|FGFR2|KRT17
GO:0044782	cilium organization	0.0205905	355	IFT74|WDR19|NME5|UBXN10|CFAP61|DNAH5|NOTCH1|CEP131|DNAH17|DNAH7|RSPH1|CFAP43|DNAAF4|LRGUK|RFX3|CFAP69|FOXJ1|ZMYND10|BBOF1
GO:0014015	positive regulation of gliogenesis	0.0233501	64	SOX8|NOTCH1|CYSLTR1|ZNF488|MYB|IL1B|SLC7A5|IL6ST|LRP2|MYRF|TSPO
GO:0001539	cilium or flagellum-dependent cell motility	0.0234688	110	DNAH5|CEP131|DNAH17|DNAH7|CFAP43|RFX3|CFAP69|CFAP58|DNAI3|IQUB|TTLL9|DEFB1|CFAP46|DYNC2H1|TEKT2|DNALI1|SPEF2|ROPN1L
GO:0060285	cilium-dependent cell motility	0.0234688	110	DNAH5|CEP131|DNAH17|DNAH7|CFAP43|RFX3|CFAP69|CFAP58|DNAI3|IQUB|TTLL9|DEFB1|CFAP46|DYNC2H1|TEKT2|DNALI1|SPEF2|ROPN1L
GO:0098655	monoatomic cation transmembrane transport	0.0273608	643	SLC40A1|KCNJ11|SLC39A2|BCL2|TRPV6|CACNB1|KCNG1|G6PD|SLC6A8|CNGA1|TTYH1|KCNQ4|NIPAL1|CACNA1D|SLC1A1|AKAP9|SLC4A11|SLC4A8|KCNH2|SLC39A4|SLC6A9|SLC15A2|GRIN3B|AKAP5|KCNH1|HAP1|KCND3|ABCC8|CACNA1I|CBARP|PLN|ATP1B1|SLC6A11|KCNK13|STAC2|STEAP2|PDZK1|PIK3CG|SLC15A1|P2RX5|CACNA2D1|PIEZO2|CCR5|SLC9A2|KCNK5|ADRA2A|SCN2B|FASLG|SLC12A1|TMEM63C|SLC6A4|ATP6V0D2|ATP2B2|SLC39A6|GSTM2|ATP13A5|PLCH1|GRIN2C|CACNA1B…
GO:0060271	cilium assembly	0.0313931	333	IFT74|WDR19|NME5|UBXN10|DNAH5|NOTCH1|CEP131|DNAH17|DNAH7|RSPH1|CFAP43|DNAAF4|LRGUK|RFX3|CFAP69|FOXJ1|ZMYND10|BBOF1
GO:0030198	extracellular matrix organization	0.0316129	292	FURIN|SCX|COL23A1|NOTCH1|CTSK|HPSE2|CTSV|KLK7|COL11A2|COL9A3|MELTF|LUM|COL8A2|SFRP2|SERPINF2|KLK5|MMP2|DPT|TGFB2|TNFRSF11B|MMP15|COL12A1|ECM2|COL7A1|COL11A1|FMOD|TPSAB1|COL10A1|THSD4|NOXO1|GREM1|COL8A1|VTN|SPINK5|ACAN|KLK4|MMP3|ADTRP|COL2A1|SMOC1|POSTN|MMP13|NTN4
GO:0007423	sensory organ development	0.0343308	471	WDR19|NPHP1|CDON|SOX8|NOTCH1|BCL2|DZANK1|LAMC3|NES|TBX2|KCNQ4|JAG2|MYO7B|SLC1A1|SDK2|MFAP5|SCRIB|ATP8A2|WNT6|PBX3|TMEM132E|VAX2|DVL1|EPHA2|LIN7A|TSKU|SLC44A4|TBX3|LHX2|COL8A2|GATA3|CELSR1|STOX1|TGFB2|EYA4|FASLG|RDH10|NDP|COL11A1|GLI3|TBX1|ATP2B2|SALL2|FSCN2|DCLK1|TENM3|COL8A1|EFEMP1|ACHE|RP1|KCNK3|FGF10|WNT2|COL2A1|SMOC1|GABRB2|SLC25A27|CECR2|FGFR2|MYOM2
GO:0043062	extracellular structure organization	0.034435	293	FURIN|SCX|COL23A1|NOTCH1|CTSK|HPSE2|CTSV|KLK7|COL11A2|COL9A3|MELTF|LUM|COL8A2|SFRP2|SERPINF2|KLK5|MMP2|DPT|TGFB2|TNFRSF11B|MMP15|COL12A1|ECM2|COL7A1|COL11A1|FMOD|TPSAB1|COL10A1|THSD4|NOXO1|GREM1|COL8A1|VTN|SPINK5|ACAN|KLK4|MMP3|ADTRP|COL2A1|SMOC1|POSTN|MMP13|NTN4
GO:0030031	cell projection assembly	0.036926	533	IFT74|WDR19|NME5|CTTN|UBXN10|PLXNB3|DNAH5|NOTCH1|CEP131|P2RY12|DNAH17|DNAH7|RSPH1|CFAP43|DNAAF4|LRGUK|RFX3|CFAP69|TTYH1|MTSS2|FOXJ1|ZMYND10|BBOF1|VAV3|CFAP58|DNAI3|IQUB|MACIR|KLHL41|CDC42EP1|CFAP91|FGD3|EPHA2|VSTM5|HAP1
